# Supplementary material for: Comprehensive analysis of integrin αvβ3/α6β1 in prognosis and immune escape of prostate cancer
Source: Aging (Albany NY). 2023 Oct 19;15(20):11369–88. doi: 10.18632/aging.205131 (PMC10637796; doi:10.18632/aging.205131)
Supplement: Supplementary Table 1 [file aging-15-205131-s002.xlsx]

## Sheet: GSEA.result
Supplementary Table 1. GO enrichment analysis for two risk groups in TCGA cohort.
ID	Description	setSize	enrichmentScore	NES	pvalue	p.adjust	qvalues	rank	leading_edge	core_enrichment
GOCC_MITOCHONDRIAL_MATRIX	GOCC_MITOCHONDRIAL_MATRIX	457	0.350324	1.38464	4.66975e-08	0.000284733	0.00024457	10017	tags=64%, list=54%, signal=31%	AKR1B15/ACSM6/HTD2/HMGCS2/DHRS2/CASQ1/OXCT2/ACSM2B/HOGA1/ALAS2/ACSM5/AMT/TMLHE/BCKDHA/PC/FDX2/NAT8L/MTHFS/ETFB/MRPS24/DMGDH/THEM5/HSPA1L/NUDT13/PABPC5/MRPL38/TK2/AGXT/COQ3/PARS2/ACADL/ACO2/ACADVL/RNASEL/MIPEP/TXNRD2/AASS/TRMT61B/ABAT/TDRD7/SARS2/SIRT4/NMNAT3/MCCC2/MRPL11/CLPP/DHX30/HSD17B8/ACSS2/OXCT1/IDH3G/ALDH5A1/MRPS31/MCCC1/NDUFS8/FDXR/NAXE/MRM1/ETFBKMT/HSD17B10/ACSS1/MTERF4/SHC1/TYMS/FASTK/M…
GOBP_COVALENT_CHROMATIN_MODIFICATION	GOBP_COVALENT_CHROMATIN_MODIFICATION	444	0.351175	1.38655	8.54669e-08	0.000284733	0.00024457	8970	tags=59%, list=48%, signal=31%	NOS1/KDM4E/PADI4/PADI1/PRDM16/SNCA/PAX5/BRCA1/MYB/MUC1/PADI2/HDAC10/PRDM5/BRD7/TRERF1/MAPK3/PHC1/RCOR3/DDB2/TADA2A/TAF6L/KDM5A/N6AMT1/EHMT2/KAT5/RING1/KMT5C/RNF168/PHF19/MCM3AP/AASS/ZNF304/WDR61/KAT6A/PER2/CBX8/THAP7/HCFC1/HDAC11/TADA3/KANSL1L/MECOM/HUWE1/NCOA3/SIRT7/LDB1/APBB1/HDAC3/KDM5B/REST/IWS1/KDM4A/FBLL1/ARRB1/ZBTB7B/RIOX1/CDK5/SIRT2/TAF1/CARM1/PRKAA2/AUTS2/DOT1L/PRKD2/ELK4/ATXN7L3/KDM5D/A…
GOBP_SMALL_GTPASE_MEDIATED_SIGNAL_TRANSDUCTION	GOBP_SMALL_GTPASE_MEDIATED_SIGNAL_TRANSDUCTION	496	0.340755	1.35064	6.00259e-07	0.00133317	0.00114513	9224	tags=57%, list=49%, signal=30%	EPS8L3/SYNPO2L/GPR20/ARHGAP40/GPR55/FRMD7/NGEF/KNDC1/LRRD1/IQSEC3/RASA4/MCF2/NTN1/LAT/ARHGAP22/GPR18/CDKN2A/ARHGEF18/OBSCN/KSR2/PSD/GPR35/DEPDC1B/SYNGAP1/ADGRG1/KSR1/ARHGAP11B/CGNL1/RASGRP1/RIPOR2/ARHGAP30/RASGRF2/CELSR1/EPS8L1/GMIP/CHM/INPP5B/RAPGEFL1/ABCA1/HACE1/ARHGAP6/TIAM1/IQSEC1/LPAR6/PSD4/RHOH/FGD2/CAVIN4/CYTH4/RGL2/DOCK6/RHOB/DLC1/EPO/ARHGEF17/ARHGEF10/RALGPS1/RASL10A/EPS8L2/P2RY8/NUCB1/A…
GOBP_REGULATION_OF_SMALL_GTPASE_MEDIATED_SIGNAL_TRANSDUCTION	GOBP_REGULATION_OF_SMALL_GTPASE_MEDIATED_SIGNAL_TRANSDUCTION	316	0.361153	1.41009	1.73693e-06	0.00263547	0.00226372	7380	tags=51%, list=40%, signal=32%	EPS8L3/SYNPO2L/GPR20/ARHGAP40/GPR55/FRMD7/NGEF/LRRD1/IQSEC3/RASA4/MCF2/ARHGAP22/GPR18/ARHGEF18/OBSCN/PSD/GPR35/DEPDC1B/SYNGAP1/ADGRG1/ARHGAP11B/CGNL1/RASGRP1/RIPOR2/ARHGAP30/RASGRF2/EPS8L1/GMIP/INPP5B/ABCA1/ARHGAP6/TIAM1/IQSEC1/LPAR6/PSD4/RHOH/FGD2/CAVIN4/CYTH4/RGL2/RHOB/DLC1/EPO/ARHGEF17/ARHGEF10/RALGPS1/EPS8L2/P2RY8/ARHGEF25/SGSM3/RHOBTB1/GBF1/ARFGEF2/RASAL3/TSC2/ARRB1/FAM13B/VAV2/ECT2/ERBIN/AK…
GOBP_NIK_NF_KAPPAB_SIGNALING	GOBP_NIK_NF_KAPPAB_SIGNALING	164	0.403714	1.53559	1.97769e-06	0.00263547	0.00226372	8416	tags=63%, list=45%, signal=35%	NOD2/NLRP12/IL23A/C1QTNF4/NLRP3/TLR7/TNF/NOL3/SPHK1/CARD10/NMI/C1QTNF3/NLRC3/IFI35/BMP7/TLR3/PSMB10/PSMC1/TIRAP/TNFSF15/LGALS9/AKIP1/AGER/TLR2/CD14/PSMA6/PSME4/PSME2/LRRC19/PSMB3/IRAK1/RC3H2/RBCK1/PSME3/DICER1/PPP4C/SKP1/EGFR/EP300/DDX3X/TREM2/CALR/PSMC6/RIPK3/TERF2IP/EDARADD/AGO3/MALT1/SASH1/PSMC4/PSMB8/RC3H1/PSMD13/PSMC2/NFKB2/RPS3/TRAF4/PSMD11/TNFRSF10A/PSMD3/PSMB7/RASSF2/TMSB4X/PSMA2/PPM1B/PS…
GOMF_MOLECULAR_ADAPTOR_ACTIVITY	GOMF_MOLECULAR_ADAPTOR_ACTIVITY	312	0.359241	1.40152	3.25026e-06	0.00360941	0.00310029	9392	tags=61%, list=50%, signal=31%	COL19A1/ARRDC5/FLRT1/SHANK1/STX1B/FCRL2/GRIP2/FLRT3/PDZK1/LAT/TRIM6/DLG5/LPL/IPPK/ANK2/SPAG4/ANK1/CD3G/KSR1/CNOT1/STON2/VPS18/CARD10/GOSR2/AFAP1L2/CRADD/BAIAP2/FSCN1/MAP1A/BLNK/LDLRAP1/SH2B3/AP1G2/AP1M1/AP2A2/POLD3/TRIM22/TIRAP/SPATA2/YKT6/HCFC1/DOK2/SH2B2/ATP1B2/ARRB1/SH3PXD2A/SYNE1/NCSTN/MMS19/AKAP13/SHANK2/RGS14/CNTLN/ANAPC1/MAPK8IP1/GOSR1/CHCHD3/VPS11/SHC1/AP2B1/GAB2/STX16/DDB1/NUP62/MAGI3/DG…
GOBP_RAS_PROTEIN_SIGNAL_TRANSDUCTION	GOBP_RAS_PROTEIN_SIGNAL_TRANSDUCTION	334	0.349196	1.36588	6.04873e-06	0.00555601	0.00477231	7380	tags=50%, list=40%, signal=31%	EPS8L3/SYNPO2L/GPR20/GPR55/LRRD1/IQSEC3/RASA4/NTN1/LAT/GPR18/CDKN2A/ARHGEF18/KSR2/PSD/GPR35/SYNGAP1/ADGRG1/KSR1/RASGRP1/RIPOR2/RASGRF2/CELSR1/EPS8L1/ABCA1/HACE1/ARHGAP6/TIAM1/IQSEC1/LPAR6/PSD4/RHOH/CAVIN4/CYTH4/RGL2/RHOB/DLC1/EPO/ARHGEF10/RALGPS1/EPS8L2/P2RY8/ARHGEF25/RERG/ZNF304/SGSM3/DOK2/GBF1/GNA12/ARFGEF2/RASAL3/CDC42EP1/RAB35/RASSF1/NRAS/ARRB1/GPSM2/ERBIN/AKAP13/AUTS2/KCTD10/RALB/KANK2/RASA1…
GOMF_TRANSCRIPTION_COREGULATOR_ACTIVITY	GOMF_TRANSCRIPTION_COREGULATOR_ACTIVITY	464	0.334196	1.32122	6.67088e-06	0.00555601	0.00477231	10298	tags=64%, list=55%, signal=29%	NR0B2/IL31RA/TRIM31/NRG1/PRDM16/TLE6/PARP15/MLIP/PSMC3IP/BRCA1/MUC1/CENPJ/PAGE4/CRYM/ZNF410/LPIN3/NMI/BRD7/MAML2/MED22/TRERF1/AJUBA/RCOR3/ARID3A/TADA2A/TAF6L/WWOX/LMCD1/BEND6/KDM5A/JMY/BTG2/KAT5/SRA1/XPC/CALCOCO1/MAMSTR/AASS/SMARCD3/TRIM22/KAT6A/PER2/HCFC1/SUFU/TADA3/TRIM21/NCOA3/SIRT7/LDB1/RUNX1T1/APBB1/HDAC3/SMARCC2/CBFA2T2/KDM5B/ARRB1/ATN1/MMS19/MID2/DNAJB1/CARM1/MED18/ARID5B/ATXN7L3/PARP9/FHL…
GOBP_PEPTIDYL_LYSINE_MODIFICATION	GOBP_PEPTIDYL_LYSINE_MODIFICATION	374	0.340261	1.33455	1.88495e-05	0.0139549	0.0119865	9438	tags=58%, list=51%, signal=29%	METTL21C/NOS1/NAT8/PRDM16/SNCA/PAX5/BRCA1/GNL3L/MYB/MUC1/HDAC10/POM121/P3H3/PRDM5/BRD7/MAPK3/NUP210/TADA2A/TAF6L/N6AMT1/EHMT2/VIPAS39/KAT5/KMT5C/PHF19/MCM3AP/SENP5/ZNF304/WDR61/KAT6A/THAP7/SETD4/HCFC1/SENP2/SIRT4/TADA3/KANSL1L/MECOM/NCOA3/SIRT7/LDB1/APBB1/PLOD1/IWS1/ARRB1/SIRT2/TAF1/PRKAA2/AUTS2/ETFBKMT/DOT1L/NUP133/ARID4A/ZBED1/RIF1/SETD7/NUP62/MRGBP/SMARCB1/HDAC4/WBP2/DHPS/SETD5/SUPT3H/MBD3/KAT…
GOBP_POSITIVE_REGULATION_OF_NIK_NF_KAPPAB_SIGNALING	GOBP_POSITIVE_REGULATION_OF_NIK_NF_KAPPAB_SIGNALING	65	0.471026	1.67403	2.10835e-05	0.0140479	0.0120664	8072	tags=65%, list=43%, signal=37%	NOD2/NLRP12/IL23A/C1QTNF4/TLR7/TNF/SPHK1/NMI/IFI35/TLR3/LGALS9/AGER/TLR2/CD14/LRRC19/IRAK1/RC3H2/RBCK1/EGFR/EP300/DDX3X/TREM2/CALR/TERF2IP/EDARADD/AGO3/SASH1/RC3H1/RPS3/LAPTM5/RELA/CCL19/IL18R1/PTP4A3/PHB/NFAT5/EIF2AK2/APP/NOD1/TLR4/NR3C2/CD27
GOBP_NEGATIVE_REGULATION_OF_ORGANELLE_ORGANIZATION	GOBP_NEGATIVE_REGULATION_OF_ORGANELLE_ORGANIZATION	327	0.34556	1.35074	2.33175e-05	0.014124	0.0121318	8786	tags=56%, list=47%, signal=30%	TUBB4A/TRIM54/FRMD7/SHANK1/SNCA/TEX14/TMSB15B/ARHGEF18/DUSP1/USP44/BRCA1/GNL3L/APC2/TFRC/RTEL1/NOL3/PLEKHH2/CGNL1/BECN1/PATL2/SMG6/ACD/PLK1/CARMIL1/CDT1/PFN4/SPEF1/ARHGAP6/TBC1D4/INPP5J/BMP7/MTM1/DLC1/ADD3/MPV17L/TEN1/MDM1/GMFG/HUWE1/TRIOBP/TSC2/FNIP1/SSH3/FLII/SVIL/PHF23/TINF2/ZWINT/CLASP2/NAA10/AURKAIP1/TERF2/SSH1/SCIN/TESK1/MID1IP1/LCMT1/KAT2A/CAPZB/YAP1/PPIF/LMOD1/USP30/TACSTD2/TPR/CDH5/IK/MA…
GOBP_PROTEIN_TARGETING	GOBP_PROTEIN_TARGETING	423	0.328012	1.29262	3.28339e-05	0.0152704	0.0131164	8275	tags=52%, list=44%, signal=30%	HAP1/NOS2/BAAT/PIPOX/PDZK1/HAO2/EHHADH/SLC51B/AQP11/ZDHHC15/CRAT/PAOX/ACOX3/RTP4/GOSR2/PAK1/ERBB2/HSPA1L/CHM/AGXT/ZDHHC24/TRAM2/SLC27A2/MIPEP/AP4B1/SEC61A2/NUCB1/ABLIM3/ACOT8/TOMM20L/MON1A/SIRT4/HUWE1/RASSF9/DHRS4/EXOC4/RPL21/SREBF2/AP3D1/CDK5/MON1B/SMURF1/ERBIN/SEC61G/ZDHHC23/FIS1/CROT/ZFYVE16/VPS13C/MTERF4/VPS11/GDI1/MIEF2/SIL1/SPCS3/USP9X/TRAM1L1/FYN/MYO1C/RAC2/VPS4A/RNF31/GOLGA7/RPS10/SEC61A1…
GOCC_VACUOLAR_MEMBRANE	GOCC_VACUOLAR_MEMBRANE	408	0.334349	1.31607	3.33952e-05	0.0152704	0.0131164	9545	tags=60%, list=51%, signal=30%	ABCA13/ABCC11/CEACAM6/RAB44/PIGR/SPAAR/ATP6V0A4/AZU1/CP/GIMAP5/SLC30A4/SPNS1/MAP1LC3B2/GPLD1/TLR7/IRGM/MANBA/DPP4/MREG/TCIRG1/VPS18/ZFYVE26/RILP/DAGLB/CFTR/WDR59/ABHD6/VAC14/SLC38A9/RAB5C/CLEC16A/MCOLN3/EEF1A2/CLCN5/GNA11/RRAGB/GPR137C/RUBCNL/ULK1/RNF183/CYB561A3/ATG16L2/TLR3/SLC46A3/ANPEP/AP1M1/AP2A2/AP1S1/VPS39/BORCS8/KPTN/SLC12A4/AP1B1/SLC29A3/MAP1LC3C/FNIP1/ARRB1/AP3D1/LNPEP/NCSTN/UBXN6/ABCB6…
GOBP_REGULATION_OF_CHROMOSOME_ORGANIZATION	GOBP_REGULATION_OF_CHROMOSOME_ORGANIZATION	261	0.359318	1.39353	3.39564e-05	0.0152704	0.0131164	8430	tags=56%, list=45%, signal=31%	NOS1/TEX14/PRKCQ/AXIN2/DUSP1/USP44/BRCA1/GNL3L/MYB/MUC1/RTEL1/DDX11/BECN1/SMG6/ACD/PLK1/BRD7/CDT1/MAPK3/CDCA5/TADA2A/PHF19/MAP2K7/ZNF304/WDR61/TEN1/ARRB1/ZBTB7B/HECW2/YLPM1/AUTS2/MAP3K4/PRKD2/TINF2/ANAPC1/ZWINT/NAA10/TERF2/CDC26/RIF1/UPF1/NEK2/TACC3/NUMA1/SMARCB1/PPP1R10/WBP2/RIOK2/ANAPC11/LCMT1/KAT2A/NIPBL/OGT/TPR/IK/ING2/RUVBL2/MAPT/NABP2/ERCC4/PAF1/PPHLN1/ERCC1/KMT2E/CDC6/POT1/TADA2B/AURKB/SMC…
GOMF_PROTEIN_MACROMOLECULE_ADAPTOR_ACTIVITY	GOMF_PROTEIN_MACROMOLECULE_ADAPTOR_ACTIVITY	260	0.357299	1.38536	3.45177e-05	0.0152704	0.0131164	6209	tags=47%, list=33%, signal=32%	COL19A1/ARRDC5/FLRT1/SHANK1/STX1B/FCRL2/GRIP2/FLRT3/PDZK1/LAT/TRIM6/DLG5/LPL/ANK2/SPAG4/ANK1/CD3G/KSR1/STON2/VPS18/CARD10/GOSR2/AFAP1L2/CRADD/BAIAP2/FSCN1/MAP1A/BLNK/LDLRAP1/SH2B3/AP1G2/AP1M1/AP2A2/POLD3/TRIM22/TIRAP/SPATA2/YKT6/HCFC1/DOK2/SH2B2/ATP1B2/ARRB1/SYNE1/NCSTN/MMS19/AKAP13/SHANK2/RGS14/CNTLN/MAPK8IP1/GOSR1/VPS11/SHC1/AP2B1/GAB2/STX16/DDB1/NUP62/DGCR8/ARRDC1/ST13/BET1L/AMFR/PPP4R2/AP2M1/…
GOBP_DEPHOSPHORYLATION	GOBP_DEPHOSPHORYLATION	464	0.326574	1.29109	3.84464e-05	0.0152704	0.0131164	10406	tags=63%, list=56%, signal=29%	MYH8/CHP2/PPP1R27/PLPPR3/MYH6/NT5DC4/CA3/PON3/PTPRH/THNSL2/DRD2/TMEM225B/PPEF1/PTPRU/ITGA2/ACP7/GPLD1/DUSP1/TNF/CCDC8/PLPP7/SLC39A10/ELFN2/LRRC39/PKMYT1/DUSP23/SMG6/ACP5/MTMR3/FBP2/CILP/LPIN3/CSRNP3/ELFN1/INPP5B/THTPA/DAPP1/INPP5J/PIN1/MTMR10/CAMK2G/PCIF1/MTM1/DMPK/DLC1/NT5C/CDC25B/ZFYVE1/CDCA2/CD33/TSC1/CEP192/FKBP15/PPP4R4/PTPN18/RCAN3/TNS2/RBM26/PPP2R2B/SSH3/SBF1/SYMPK/DUSP18/PLPP3/DUSP16/INPP…
GOBP_PEPTIDYL_GLUTAMIC_ACID_MODIFICATION	GOBP_PEPTIDYL_GLUTAMIC_ACID_MODIFICATION	29	0.58063	1.86281	3.9925e-05	0.0152704	0.0131164	5085	tags=55%, list=27%, signal=40%	NAA11/AGBL4/TTLL13P/TPGS1/AGBL2/TTLL6/TTLL1/FOLH1/TTLL11/TTLL3/TTLL7/NAA10/TTLL5/AGBL3/TPGS2/CEP41
GOBP_CHROMOSOME_SEGREGATION	GOBP_CHROMOSOME_SEGREGATION	310	0.343606	1.34047	4.12527e-05	0.0152704	0.0131164	8471	tags=55%, list=45%, signal=30%	SYCE3/MEI4/ANKRD31/TEX14/MEIOC/SYCP2/AXIN2/DUSP1/SYCE2/USP44/BRCA1/DDX11/TTN/BECN1/PLK1/CDT1/DMC1/CCNE1/CDCA5/RECQL5/REC8/CENPC/CEP85/CHMP7/CDCA2/NCAPH/SIRT7/MAU2/FANCM/MIS18A/MLH1/SIRT2/TEX12/HECW2/MMS19/DIS3L2/MLH3/ECT2/BEX4/RGS14/DYNC1H1/ANAPC1/ZWINT/SMC2/NAA10/EME2/CDC26/BRIP1/AURKC/RAD18/NEK2/TACC3/NUMA1/NUP62/USP9X/CHMP5/INO80/RIOK2/ANAPC11/STAG1/LCMT1/CENPS/NIPBL/VPS4A/RAN/NCAPH2/P3H4/PLSC…
GOMF_TUBULIN_BINDING	GOMF_TUBULIN_BINDING	356	0.336693	1.32026	4.68652e-05	0.0164349	0.0141167	9013	tags=56%, list=48%, signal=29%	CEP295NL/C10orf90/DPYSL5/NEFM/SAXO1/TRIM54/AGBL4/TTLL13P/S100A9/SNCA/TPGS1/JAKMIP1/TRPV4/FSD1/SPAG8/CAPN6/MAP1LC3B2/HOOK2/BRCA1/APC2/JAKMIP3/CENPJ/MX2/TTLL6/TTLL1/PLK1/CLIP2/BCAS3/SPEF1/TIAM1/TTLL11/KIF24/TUBGCP2/MAP1A/TTLL7/CLIP4/KIF5C/KATNAL2/DCTN1/OGG1/RAB11FIP5/DYNC1I1/CCDC181/MDM1/RMDN3/CCDC88B/DNM1/MAP1LC3C/FAM161A/MARK4/MID2/BEX4/KIF7/RGS14/KIF27/TBCA/CLASP2/CCDC88A/TTLL5/CEP44/NUMA1/KIF5A…
GOMF_PROTEIN_SERINE_THREONINE_KINASE_ACTIVITY	GOMF_PROTEIN_SERINE_THREONINE_KINASE_ACTIVITY	419	0.325518	1.28247	6.48641e-05	0.0216095	0.0185614	9732	tags=58%, list=52%, signal=29%	MYO3A/MYLK2/ERN2/ITPKA/SOSTDC1/TGFBR3L/CDKL2/GRK1/CAMK1G/PRKCQ/OBSCN/KSR2/CAMK1/CDKL4/SPEG/PASK/KSR1/GRK5/WNK4/PKMYT1/TTN/PAK1/PLK1/CDC42BPG/ACVR1C/MAPK10/DCLK2/PRKCZ/MAPK3/TESK2/PRKAB2/STKLD1/CAMK2G/ARAF/ULK1/DMPK/ACVR1/MYLK4/RPS6KB2/PHKA2/CLK4/GRK4/CIT/CDK11A/MAP3K3/FAM20C/MAP2K7/MINK1/CDK4/CDK18/BMP2K/ALPK1/PHKG2/PTK2B/STK36/CDK5/MARK4/TAF1/ENG/ADCK2/PRKD3/MAPK7/AKAP13/PRKAA2/MAP3K4/PRKD2/CSNK…
GOBP_VESICLE_ORGANIZATION	GOBP_VESICLE_ORGANIZATION	328	0.336716	1.31615	7.38884e-05	0.0229999	0.0197556	9318	tags=59%, list=50%, signal=30%	ANXA8/SPINK2/STX1B/GRIA1/SNCA/TRAPPC5/AQP11/HPS1/HOOK2/ZDHHC15/DLG4/ASIP/ANXA8L1/MX2/SPHK1/SAMD9/INSIG1/VPS18/GOSR2/ALS2CL/RILP/ABCA1/SYP/SNX33/TGFA/SHROOM2/TBC1D4/RUBCNL/AKTIP/IST1/CHMP7/SEC23B/AP1M1/VPS39/TRAPPC2/GBF1/ARFGEF2/SERPINE2/DNM1/RAB32/AP3D1/GORASP1/SNX11/PPP6R1/TMED10/ZFYVE16/GOSR1/ZNF385A/VPS11/STX16/SDC1/CHMP5/SDC4/BLOC1S6/TMEM9/VPS4A/CD2AP/CHMP3/AP2M1/CHP1/SNAP23/STX12/USP8/TRAPPC…
GOBP_REGULATION_OF_CELL_CYCLE_PHASE_TRANSITION	GOBP_REGULATION_OF_CELL_CYCLE_PHASE_TRANSITION	434	0.325543	1.28411	7.84006e-05	0.0229999	0.0197556	10599	tags=65%, list=57%, signal=29%	TUBB4A/C10orf99/HUS1B/CYP1A1/TEX14/CDKN2A/KCNA5/TUBA4A/DBF4B/DUSP1/USP44/BRCA1/MUC1/ORC1/CENPJ/CNOT1/CEP131/PLK1/BRD7/CDT1/CRADD/CDCA5/UBD/TNKS1BP1/ARID3A/NACC2/CEP72/CDC25B/PKD1/PSMB10/PSMC1/BTG2/ZFYVE19/XPC/DCTN1/ZFP36L1/DTL/CDKN2D/E2F4/SMARCD3/MEPCE/CEP192/CDK4/SENP2/ATAD5/ID2/RBL1/NAE1/SIRT2/HECW2/TAF1/ADAM17/CARM1/SYF2/CEP152/CDC25C/DYNC1H1/ANAPC1/ZWINT/CDK6/KANK2/ZNF385A/CDC26/TRIM39/NEK2/D…
GOBP_REGULATION_OF_CYTOSKELETON_ORGANIZATION	GOBP_REGULATION_OF_CYTOSKELETON_ORGANIZATION	487	0.321846	1.27491	8.17848e-05	0.0229999	0.0197556	10910	tags=66%, list=59%, signal=28%	SYNPO2L/TUBB4A/ARHGAP40/EPHA5/TRIM54/FRMD7/SHANK1/S100A9/SNCA/MAGEL2/TMSB15B/TRPV4/FSD1/CCL26/ARHGEF18/CAPN6/NTRK3/GRHL3/TGFB3/PLXNA3/BRCA1/SPIRE2/APC2/CENPJ/PLEKHH2/CGNL1/PAK1/CELSR1/PLK1/CARMIL1/EPHA1/BCAS3/PFN4/SPEF1/ARHGAP6/MAPK3/INPP5J/BAIAP2/FSCN1/RHOH/FHOD1/MAP1A/CCL24/RHOB/JAM3/DLC1/ADD3/PKD1/NES/JMY/ARHGEF10/TEK/DCTN1/TSC1/RHOBTB1/MDM1/GMFG/CDC42EP1/RASSF1/TRIOBP/SSH3/PTK2B/FLII/ID1/GPSM…
GOMF_ATPASE_ACTIVITY	GOMF_ATPASE_ACTIVITY	454	0.325151	1.28521	8.29128e-05	0.0229999	0.0197556	9628	tags=57%, list=52%, signal=28%	ABCC12/MYH8/MYO1A/ABCA13/MYH7/MYO3A/DDX4/MYH6/ABCC11/ACSM6/ATP1A4/DQX1/ACSBG2/TDRD12/ABCG4/MYO7B/DDX25/ACSM2B/ABCA7/FIGNL2/DNAH10/ATP8B3/ATP13A4/DDX47/ACSM5/DNAH6/ABCC8/DHX58/ATP2A1/ORC1/DNAH2/RTEL1/ATAD3C/DDX11/CHD9/DHX38/DNAH5/FIGN/DNHD1/CFTR/HSPA1L/ABCB4/DMC1/ABCA1/ABCA12/MYO1F/MFSD2A/PMS2/IQCA1/RECQL5/HELB/MSH5/SLC27A2/ABCC2/ABCF1/DDX60L/DDX31/PSMC1/KIF5C/AK6/KATNAL2/MCM8/ATP2A3/MYO15A/ATAD5/…
GOCC_NUCLEAR_SPECK	GOCC_NUCLEAR_SPECK	397	0.329999	1.29746	8.6297e-05	0.0229999	0.0197556	9720	tags=60%, list=52%, signal=29%	SYNPO2L/SLC28A1/SERPINB13/DNAAF1/CMYA5/AFF2/GRK5/CARMIL1/PLAG1/DNAJC11/MAML2/NFATC4/TFIP11/SDCBP2/ATOH8/PIN1/FTO/S100PBP/HBP1/TOE1/EHMT2/AK6/WT1/RING1/SREK1/OGG1/PHF7/TRIM22/KAT6A/THAP7/ZC3H18/MECOM/BMP2K/SAP130/SIRT7/APBB1/SRRM2/DGKZ/SART1/PRPF4/ZC3H13/SYF2/ERBIN/PRKAA2/RUFY1/YLPM1/THOC1/CDC25C/PRPF6/ATPAF2/ASCC2/SF3A3/PRPF3/HDAC4/CD2BP2/THRAP3/PRPF19/AFDN/HDAC5/SRSF5/PRPF4B/PSME4/PNN/PSPC1/VPS7…
GOCC_ENDOCYTIC_VESICLE	GOCC_ENDOCYTIC_VESICLE	299	0.339401	1.32225	9.64494e-05	0.0243583	0.0209225	9449	tags=59%, list=51%, signal=30%	PGLYRP1/MPO/CACNG8/SFTPD/WNT6/NOD2/GRIA1/DRD2/ATP6V0A4/CD207/AMN/SFTPA1/APOB/GRIA3/DLG4/HBB/TLR7/IRGM/DPP4/RAB11FIP1/SPHK1/TCIRG1/STAB2/HVCN1/BECN1/LPAR2/RILP/HBEGF/INPP5B/ABCA1/HBA2/RAB5C/HBA1/CTLA4/CAMK2G/NCF2/AP2A2/TIRAP/CPNE6/RAB11FIP5/NOS3/PTCH1/STAB1/RAB35/UNC93B1/HLA-C/CD36/RAB32/TLR2/CLTB/LRP2/VPS11/AP2B1/CLTC/WNT3/MYO1C/RAC2/SYK/CD2AP/ATP6V0E2/AP2M1/ATP6V0A1/RABEP1/EHD1/SNAP23/STX12/RAB2…
GOBP_LEUKOCYTE_MIGRATION	GOBP_LEUKOCYTE_MIGRATION	436	0.323599	1.27674	9.87055e-05	0.0243583	0.0209225	9277	tags=57%, list=50%, signal=29%	CXCR5/AIRE/CEACAM5/CXCR1/C10orf99/CEACAM3/DBH/S100A14/S100A7/CEACAM6/SFTPD/CXCL5/NOD2/MMP1/SLC7A10/UMODL1/DEFB124/CCL23/EPX/S100A9/CXCR2/C5AR2/IL6/IL23A/AZU1/GCSAML/CCR2/EDN2/MMP28/ITGA2/CCL26/APOB/CD200R1/ITGA2B/ADTRP/NLRP3/DUSP1/CCL8/TNF/DPP4/PADI2/ARTN/CXCL2/MPP1/FUT9/CCL22/NBL1/PIK3CD/ZAP70/RIPOR2/KIT/CD99L2/MAPK3/LGMN/ITGAL/RHOH/SLC12A2/CCL25/CCL24/JAM3/ADA/TEK/ZNF580/STAT5B/TIRAP/LGALS9/DOK…
GOCC_MICROTUBULE	GOCC_MICROTUBULE	411	0.3257	1.28271	0.000119033	0.0273488	0.0234911	10571	tags=64%, list=57%, signal=29%	SCTR/TUBB4A/CRHBP/DNAI2/SAXO1/RP1L1/TRIM54/TUBB1/TTLL13P/DNAH10/TPGS1/JAKMIP1/TRPV4/FSD1/TUBA8/CAPN6/DNAH6/DCDC2C/MAP1LC3B2/HOOK2/TUBA4A/APC2/DNAH2/CENPJ/ZNF804A/TTLL6/TTLL1/DNAH5/FIGN/PLK1/CLIP2/BCAS3/SPEF1/TIAM1/TTLL11/KIF24/SHROOM2/TTLL3/TUBGCP2/MAP1A/ENKD1/TCP11L1/TTLL7/CLIP4/KIF5C/KATNAL2/DCTN1/DYNC1I1/CCDC181/MDM1/ARFGEF2/RMDN3/RASSF1/DNM1/MAP1LC3C/FAM161A/DCDC2/CDK5/SVIL/AKNA/SIRT2/MID2/DN…
GOMF_NUCLEOSIDE_TRIPHOSPHATASE_REGULATOR_ACTIVITY	GOMF_NUCLEOSIDE_TRIPHOSPHATASE_REGULATOR_ACTIVITY	495	0.317993	1.26017	0.000119033	0.0273488	0.0234911	8847	tags=54%, list=47%, signal=29%	RGPD1/ARHGAP40/PCP2/FRMD7/RGS6/ADGRB3/NGEF/RASA4/RGPD3/MCF2/PLEKHG4B/ARHGAP22/ARHGEF18/OBSCN/HPS1/PSD/DEPDC1B/SYNGAP1/PLEKHG4/RASGRP1/TBC1D3B/ALS2CL/ARHGAP30/RASGRF2/EPS8L1/GMIP/RCBTB2/CHM/RAPGEFL1/RGPD8/ARHGAP6/TIAM1/GPSM1/TBC1D4/IQSEC1/PSD4/RHOH/ARHGEF40/FGD2/TBC1D2B/CYTH4/DENND1C/AGAP9/RGL2/ACAP3/DOCK6/DLC1/ARHGEF17/ARHGEF10/RALGPS1/EPS8L2/TBC1D2/STXBP5L/NUCB1/SEC23B/ARHGEF25/TSC1/TBC1D9B/RGS1…
GOBP_NEGATIVE_REGULATION_OF_PHOSPHORUS_METABOLIC_PROCESS	GOBP_NEGATIVE_REGULATION_OF_PHOSPHORUS_METABOLIC_PROCESS	482	0.318531	1.26091	0.000128102	0.0275336	0.0236499	9616	tags=57%, list=52%, signal=28%	KIRREL2/PPP1R27/NLRP2B/SERPINB3/RD3/WEE2/PIP5KL1/DRD2/SNCA/TMEM225B/NLRP12/SPRED3/CDKN2A/KLHL31/NTRK3/PRKAR1B/DUSP1/TNF/CCDC8/BDKRB2/ELFN2/PKMYT1/NPPA/TRIB2/CSRNP3/ELFN1/CD109/XDH/PLK1/EPHA1/PIK3IP1/PRKCZ/ADORA2A/AJUBA/INPP5J/BMP7/RHOH/PCIF1/TESC/TARBP2/CEP85/ZFYVE1/SH2B3/CIT/CDKN2D/CAMK2N1/CEP192/PPARA/DDIT4/GMFG/FKBP15/PPP4R4/LRP6/RBM26/TSC2/PID1/ARRB1/DUSP18/SIRT2/HEXIM1/PLPP3/ENG/DUSP16/PDGFB…
GOBP_POSITIVE_REGULATION_OF_PROTEOLYSIS	GOBP_POSITIVE_REGULATION_OF_PROTEOLYSIS	353	0.33406	1.31	0.000128102	0.0275336	0.0236499	10583	tags=68%, list=57%, signal=30%	GRIN2B/SERPINB3/AGBL4/SEMG1/ASTL/S100A9/SNCA/NLRP12/KCNE2/GRIN1/P2RX1/ACER2/NLRP3/GPLD1/TNFSF10/TNF/ST20/PRSS22/CLEC3B/TRIB2/CDC20B/XDH/PLK1/ACVR1C/CRADD/SEMG2/SNX33/CLEC7A/LGMN/EPHA4/DLC1/ADAM9/IST1/VSIR/PSMC1/SPON1/TNFSF15/ATP2A3/LGALS9/TBC1D10A/BEX3/AGER/REST/BBS7/PTK2B/CCDC22/ARRB1/NRDC/SIRT2/NCSTN/TAF1/SMURF1/TMTC3/FIS1/AURKAIP1/PSEN1/BBC3/IFT57/DNAJB2/HECTD1/CLN6/PSME4/FYN/PSME2/PLK3/SYK/RH…
GOBP_MODULATION_OF_EXCITATORY_POSTSYNAPTIC_POTENTIAL	GOBP_MODULATION_OF_EXCITATORY_POSTSYNAPTIC_POTENTIAL	43	0.502991	1.70849	0.000137859	0.0287048	0.0246559	4138	tags=49%, list=22%, signal=38%	NPY2R/IGSF11/CHRNA7/SHANK1/STX1B/TMEM108/GRIN1/DLG4/ADRB2/CELF4/PRKCZ/DMPK/NLGN2/PTK2B/SHANK2/MTMR2/SSH1/S1PR2/SH3GL1/ZMYND8/CUX2
GOBP_ENDOSOMAL_TRANSPORT	GOBP_ENDOSOMAL_TRANSPORT	226	0.356664	1.37387	0.000150774	0.02937	0.0252272	9761	tags=64%, list=52%, signal=31%	ANXA8/GRIP2/MAGEL2/SRL/ANXA8L1/GOSR2/NDRG4/RILP/ABCA1/SNX33/CLEC16A/RBSN/DENND1C/MVB12B/SNX8/CHMP7/REPS2/DCTN1/VPS39/EVI5/YKT6/TBC1D10A/GBF1/VPS50/RASSF9/CCDC93/RAB35/CCDC22/AP3D1/SNX12/UBXN6/SNX5/ACAP2/ZFYVE16/GOSR1/VPS52/RNF126/SNX17/STX16/SNX27/CHMP5/CLTC/BET1L/LEPROTL1/DCLK1/VPS4A/CHMP3/VPS29/ZFYVE9/EHD1/GCC2/REPS1/MICALL2/TBC1D23/VAMP3/UBE2O/INPP5F/GGA1/TRIM27/ARHGAP1/TSG101/STAM2/RAB14/ITSN…
GOBP_POSITIVE_REGULATION_OF_CHROMOSOME_ORGANIZATION	GOBP_POSITIVE_REGULATION_OF_CHROMOSOME_ORGANIZATION	159	0.36887	1.39945	0.000153041	0.02937	0.0252272	8430	tags=59%, list=45%, signal=33%	NOS1/PRKCQ/BRCA1/MYB/MUC1/RTEL1/DDX11/ACD/BRD7/CDT1/MAPK3/TADA2A/PHF19/MAP2K7/ZNF304/WDR61/ARRB1/ZBTB7B/AUTS2/MAP3K4/PRKD2/TERF2/RIF1/NEK2/NUMA1/SMARCB1/PPP1R10/WBP2/KAT2A/NIPBL/OGT/TPR/ING2/RUVBL2/NABP2/PAF1/PPHLN1/ERCC1/KMT2E/POT1/TADA2B/AURKB/SMC5/JARID2/RPS6KA4/CCT5/NEK7/PARN/SART3/RNF40/PML/TRIM28/HNRNPA1/MTF2/RPS6KA5/PRKD1/KAT7/MIER1/CHTOP/DNMT3B/WDR5/DNMT1/ATM/NELFE/TCP1/NBN/HNRNPD/NAP1L2/…
GOBP_POSITIVE_REGULATION_OF_CELL_ADHESION	GOBP_POSITIVE_REGULATION_OF_CELL_ADHESION	413	0.323247	1.27312	0.000155308	0.02937	0.0252272	9277	tags=55%, list=50%, signal=28%	PRSS2/NPY2R/IL1A/FUT3/IL1RL2/CEACAM6/OLFM4/TNFRSF13C/NOD2/CLECL1/FOXC2/IL6/IL23A/MIP/AZU1/PTPRU/CCR2/ITGA2/PRKCQ/SIRPB1/NLRP3/RELL2/MYB/TFRC/TNF/DPP4/ADGRG1/SHH/PAK1/ZAP70/ICOS/CD274/LILRB1/ERBB2/GCNT2/HHLA2/CARMIL1/EPHA1/GPAM/PRKCZ/CTLA4/BMP7/RHOH/CCL25/EPO/ADA/ADAM9/EGFLAM/VSIR/TEK/PNP/STAT5B/TSC1/LGALS9/IL4R/RASAL3/RARA/CHRD/CCDC88B/LDB1/TRIOBP/AGER/PTK2B/CD36/ZBTB7B/AP3D1/P4HB/PODXL/SART1/PLP…
GOBP_TELOMERE_CAPPING	GOBP_TELOMERE_CAPPING	40	0.507516	1.71039	0.000158685	0.02937	0.0252272	7390	tags=68%, list=40%, signal=41%	PRKCQ/RTEL1/SMG6/ACD/TFIP11/MAPK3/DCLRE1C/MAP2K7/TEN1/MAP3K4/TINF2/TERF2/NEK2/NABP2/ERCC4/ERCC1/POT1/AURKB/TERF2IP/NEK7/DCLRE1B/USP7/ATM/NBN/HNRNPD/RAD50/PRKDC
GOBP_REGULATION_OF_NIK_NF_KAPPAB_SIGNALING	GOBP_REGULATION_OF_NIK_NF_KAPPAB_SIGNALING	89	0.423078	1.5386	0.000168912	0.0303935	0.0261063	8288	tags=63%, list=44%, signal=35%	NOD2/NLRP12/IL23A/C1QTNF4/NLRP3/TLR7/TNF/NOL3/SPHK1/NMI/C1QTNF3/NLRC3/IFI35/BMP7/TLR3/LGALS9/AKIP1/AGER/TLR2/CD14/LRRC19/IRAK1/RC3H2/RBCK1/EGFR/EP300/DDX3X/TREM2/CALR/TERF2IP/EDARADD/AGO3/SASH1/RC3H1/RPS3/RASSF2/TMSB4X/PPM1B/LAPTM5/RELA/CCL19/IL18R1/NFKBIA/PTP4A3/PHB/NFAT5/EIF2AK2/APP/BCL3/NOD1/TLR4/PTPN22/PPM1A/NR3C2/CD27/ZC3H12A
GOBP_INTERLEUKIN_1_MEDIATED_SIGNALING_PATHWAY	GOBP_INTERLEUKIN_1_MEDIATED_SIGNALING_PATHWAY	100	0.411957	1.5143	0.000177981	0.0303935	0.0261063	7793	tags=62%, list=42%, signal=36%	IL1A/IL1RL2/NOD2/IL6/IL1RN/IL1R2/ZBP1/MAPK3/PSMB10/PSMC1/MAP3K3/UBE2V1/IRAK3/PSMA6/PSME4/PSME2/TAB3/PSMB3/IRAK1/TAB1/PSME3/SKP1/PSMC6/RPS6KA4/PSMC4/PSMB8/ZNF675/PSMD13/UBA52/PSMC2/IRAK2/PLCB1/PSMD11/PSMD3/PSMB7/OTUD4/RPS6KA5/ST18/PSMA2/IL1RAP/PSMB1/PSMB2/RELA/VRK2/PSMB9/CUL1/PSMD5/RIPK2/NFKBIA/PSMC5/PSMD1/PELI1/TNIP2/PSMC3/MYD88/FBXW11/TOLLIP/PSMB6/NFKB1/PSMA7/NOD1/IKBKB
GOCC_CONTRACTILE_FIBER	GOCC_CONTRACTILE_FIBER	227	0.352934	1.35979	0.000180248	0.0303935	0.0261063	6641	tags=46%, list=36%, signal=30%	MYH8/NRAP/SYNPO2L/MYH7/C10orf71/TNNT1/MYH6/MYLK2/KY/SMTNL2/TRIM54/MYH1/MYL2/KLHL41/ACTA1/SCN3B/SMTNL1/TIMP4/CASQ1/SMN2/TNNC2/TNNI1/CMYA5/MYH2/KCNA5/OBSCN/RYR3/MYOZ3/MYOM3/ANK2/ANK1/AHNAK2/LRRC39/ITGB1BP2/LDB3/TTN/PAK1/FBP2/MYOM2/MYOM1/PDLIM2/CAVIN4/MTM1/FBXO32/KCNN2/FLNC/RTN2/ARHGEF25/MYL5/CSRP2/SVIL/SYNE1/SYNPO/CALD1/FHL2/PSEN1/MYZAP/SDC4/PSMA6/HDAC4/NEBL/CAPZB/DST/CFL2/LMOD1/PYROXD1/PPP3CB/SCO2…
GOBP_CELL_CELL_SIGNALING_BY_WNT	GOBP_CELL_CELL_SIGNALING_BY_WNT	498	0.318394	1.26254	0.000184782	0.0303935	0.0261063	10621	tags=63%, list=57%, signal=28%	TBX18/AMER3/LBX2/RSPO4/DRAXIN/WNT6/SALL1/SOSTDC1/SFRP5/DKKL1/WIF1/NOTUM/DRD2/SCEL/PTPRU/TLE6/KREMEN2/TNN/GRHL3/AMER2/AXIN2/WNT9B/APC2/DEPDC1B/SHH/ETV2/GRK5/GPC6/CELSR1/TMEM198/BRD7/TMEM88/BARX1/CCNE1/SPEF1/NFATC4/PRICKLE2/TIAM1/FZD3/PIN1/WWOX/HBP1/PKD1/PSMB10/WNT8B/PSMC1/CALCOCO1/AP2A2/ESR1/WDR61/GRB10/TMEM237/SENP2/GNAO1/LDB1/LRP6/CDH2/TSC2/DCDC2/TLR2/CHD8/PLPP3/SMURF1/LZTS2/PRKAA2/CSNK1G1/DAAM2…
GOCC_CELL_SUBSTRATE_JUNCTION	GOCC_CELL_SUBSTRATE_JUNCTION	421	0.326255	1.28557	0.000189317	0.0303935	0.0261063	10666	tags=65%, list=57%, signal=29%	XIRP2/NRAP/S100A7/FLRT1/FLRT3/ARHGAP22/ITGA2/TRPV4/FBLN7/ITGA2B/COL17A1/ITGB8/DPP4/ALKBH6/PAK1/ABCB4/CD99L2/MAPK3/AJUBA/NHS/RHOB/DLC1/DDR2/ADAM9/FLNC/LCP1/CAPN1/TEK/CSRP2/GNA12/CDC42EP1/GIT2/TNS2/TRIOBP/CDH2/PTK2B/FLII/SVIL/P4HB/NCSTN/ADAM17/ENG/ERBIN/CLASP2/FHL2/STX16/SDC4/CTNNA1/CLTC/PAK4/PTPRA/ARL2/MARCKS/NUMB/DST/RAC2/LAP3/TADA1/RPS10/ARHGAP26/CHP1/SNAP23/CD151/PALLD/CD46/MME/HSPA1A/ADAM10/AD…
GOBP_RIBONUCLEOPROTEIN_COMPLEX_BIOGENESIS	GOBP_RIBONUCLEOPROTEIN_COMPLEX_BIOGENESIS	424	0.321683	1.26771	0.000191584	0.0303935	0.0261063	11347	tags=70%, list=61%, signal=28%	SMN2/DDX47/EIF3CL/GNL3L/NOL3/CELF4/HEATR3/HELB/RBM5/TARBP2/RNASEL/DDX31/ZNF658/TSC1/RPL3L/TRMT61B/URB1/EXOSC6/EIF3G/SIRT7/DHX30/FBLL1/TBL3/DHX37/DDX52/LSG1/SART1/GTPBP4/PIH1D2/MRM1/NOP9/NLE1/IMP4/PRPF6/AGO1/MTERF4/PES1/RPP30/EIF2S2/SF3A3/PRPF3/RPL26L1/EBNA1BP2/CD2BP2/PRPF19/SRSF5/RIOK2/NOM1/EIF4H/MRPS7/DDX18/BYSL/RPUSD3/RAN/MRM2/RPS10/MPV17L2/POP4/SCAF11/GEMIN8/SETX/EFL1/PWP1/METTL5/STRAP/RUVBL2/…
GOBP_ALPHA_BETA_T_CELL_PROLIFERATION	GOBP_ALPHA_BETA_T_CELL_PROLIFERATION	37	0.512392	1.70741	0.000220999	0.034155	0.0293373	6204	tags=59%, list=33%, signal=40%	LGALS9C/IL23A/CCR2/ZAP70/CD274/VSIR/LGALS9/RASAL3/ZBTB7B/ELF4/MAPK8IP1/TNFRSF14/SYK/CBLB/IRF1/HLA-A/LGALS9B/HLA-E/TWSG1/CD3E/SH3RF1/PTPRC
GOCC_GERM_CELL_NUCLEUS	GOCC_GERM_CELL_NUCLEUS	14	0.683733	1.9135	0.000249035	0.034155	0.0293373	4594	tags=71%, list=25%, signal=54%	MORC1/STPG4/REC8/MLH1/MLH3/TERF2/MARCKS/YAP1/AURKA/TCFL5
GOBP_NEGATIVE_REGULATION_OF_PHOSPHORYLATION	GOBP_NEGATIVE_REGULATION_OF_PHOSPHORYLATION	373	0.325079	1.2749	0.000252911	0.034155	0.0293373	9616	tags=58%, list=52%, signal=29%	KIRREL2/NLRP2B/SERPINB3/WEE2/PIP5KL1/DRD2/SNCA/NLRP12/SPRED3/CDKN2A/KLHL31/NTRK3/PRKAR1B/DUSP1/BDKRB2/NPPA/TRIB2/CD109/XDH/PLK1/EPHA1/PIK3IP1/PRKCZ/ADORA2A/AJUBA/INPP5J/BMP7/RHOH/TESC/TARBP2/CEP85/SH2B3/CIT/CDKN2D/CAMK2N1/PPARA/DDIT4/GMFG/LRP6/TSC2/PID1/ARRB1/DUSP18/SIRT2/HEXIM1/PLPP3/ENG/DUSP16/RGS14/SEMA4D/DUSP14/MAPK8IP1/IRAK3/DUSP3/SPRY1/PSEN1/NUP62/HEG1/GPS1/HDAC4/CRKL/TESK1/FBP1/TAOK3/PPP5C…
GOBP_REGULATION_OF_PROTEIN_CONTAINING_COMPLEX_ASSEMBLY	GOBP_REGULATION_OF_PROTEIN_CONTAINING_COMPLEX_ASSEMBLY	423	0.317819	1.25245	0.000252911	0.034155	0.0293373	9383	tags=57%, list=50%, signal=29%	TCL1A/TUBB4A/NRG1/ARHGAP40/MMP1/STX1B/SNCA/MAGEL2/TMSB15B/CCL26/LCAT/IRGM/GNL3L/SPIRE2/TFRC/TNF/VPS18/ANKRA2/PAK1/NLRC3/CARMIL1/CDT1/ABCA1/PFN4/PRKCZ/TFIP11/AJUBA/CLEC7A/INPP5J/DDB2/BAIAP2/FSCN1/ULK1/TMC8/CCL24/JAM3/ADD3/JMY/LCP1/DCTN1/ESR1/TIRAP/CDH17/HCFC1/GMFG/CDC42EP1/MED25/TRIOBP/FNIP1/SSH3/PTK2B/FLII/CD36/SVIL/SIRT2/GTF2H3/BAIAP2L1/FER/RALB/RASA1/P2RY12/VPS11/SSH1/COTL1/SCIN/DDB1/NUMA1/FAF1…
GOBP_REGULATION_OF_SYNAPTIC_TRANSMISSION_GLUTAMATERGIC	GOBP_REGULATION_OF_SYNAPTIC_TRANSMISSION_GLUTAMATERGIC	64	0.456572	1.62195	0.000253164	0.034155	0.0293373	3219	tags=38%, list=17%, signal=31%	HTR1B/NPY2R/GRM6/GRM4/CACNG8/GRM7/DRD1/SHANK1/DRD2/CCR2/TNF/GRIK2/ADORA2A/TSHZ3/NLGN2/SERPINE2/TPRG1L/CDH2/PTK2B/DGKZ/CNR1/CDK5/SHANK2/PSEN1
GOBP_PROTEIN_TARGETING_TO_VACUOLE	GOBP_PROTEIN_TARGETING_TO_VACUOLE	39	0.507095	1.7024	0.000254949	0.034155	0.0293373	6999	tags=72%, list=38%, signal=45%	GOSR2/MON1A/AP3D1/MON1B/SMURF1/ZFYVE16/VPS13C/VPS4A/NEDD4/GCC2/AP3M1/VPS37B/LAMP2/AP4M1/NCOA4/VTI1B/NAGPA/AP3B1/VPS13D/VPS37C/VPS37A/M6PR/LAPTM5/SORT1/HGS/SNX16/CLU/GGA3
GOCC_TRANS_GOLGI_NETWORK	GOCC_TRANS_GOLGI_NETWORK	231	0.347314	1.34005	0.000257468	0.034155	0.0293373	7582	tags=48%, list=41%, signal=29%	RBFOX1/NMNAT2/PCSK1N/CHST6/ATP8B3/AZIN2/FUT9/KLHL20/BECN1/CHST2/COG4/C17orf75/CORO7/AP4B1/NUCB1/AP1M1/AP1S1/PCSK4/GBF1/ARFGEF2/ATP9B/AP1B1/GOLGA1/RAB32/BACE2/PLPP3/SCAMP2/CABP7/YIPF1/CLTB/PLEKHA8/COG2/COG1/CLASP2/VPS52/CNST/STX16/CLTC/COG7/LAP3/CCDC91/GCC2/TRAPPC6A/AP4E1/TBC1D23/MME/ADAM10/VAMP3/TRAPPC9/SLC2A4/RAB14/ATP8B1/SNX9/AP4M1/RAC1/PIK3C2A/RAB13/RAB21/ARL1/YIPF6/PAM/COG6/HLA-DQA1/CD74/AP1M…
GOMF_PROTEIN_PHOSPHORYLATED_AMINO_ACID_BINDING	GOMF_PROTEIN_PHOSPHORYLATED_AMINO_ACID_BINDING	56	0.472036	1.65461	0.000257984	0.034155	0.0293373	7442	tags=62%, list=40%, signal=38%	ZAP70/MAPK3/PIN1/PCIF1/LDLRAP1/SHE/ARRB1/VAV2/RASA1/PLCG2/SHC1/SHB/CRKL/PIK3R3/SYK/NEDD4/CBLB/PTPN5/FGR/SCAF4/GRB2/LCK/YWHAB/PTPN11/NCK2/PTPN6/SHF/SH3BP2/LEO1/CRK/YWHAE/SH2D3C/ABL2/CBL/SHD
GOCC_FILAMENTOUS_ACTIN	GOCC_FILAMENTOUS_ACTIN	32	0.526091	1.71986	0.00027009	0.034155	0.0293373	6790	tags=66%, list=36%, signal=42%	MYO1A/MYO3A/SMTNL2/ESPN/SMTNL1/APC2/LDB3/CARMIL1/PDLIM2/JAM3/KPTN/MYO1C/CD2AP/PDLIM7/NCKAP1/RAC3/PDLIM1/EHBP1/PRICKLE4/SPECC1/PDLIM5
GOMF_CATALYTIC_ACTIVITY_ACTING_ON_RNA	GOMF_CATALYTIC_ACTIVITY_ACTING_ON_RNA	344	0.330732	1.29559	0.000271139	0.034155	0.0293373	10478	tags=66%, list=56%, signal=30%	DDX4/ERN2/TDRD12/DDX25/SLFN13/ZC3H12B/DDX47/DHX58/CNOT1/SMG6/DHX38/USB1/TYW1B/AZGP1/RNASEK/ZC3H12C/PARS2/PCIF1/FTO/ZC3H12D/DDX60L/RNASEL/RNASEH2A/TOE1/DDX31/TRMT10B/MEPCE/NYNRIN/TRMT61B/AARS2/SARS2/POLR3B/RNASEH1/TSEN34/DHX30/POLR3F/QTRT1/FBLL1/FANCM/DHX37/CMTR1/DDX52/DIS3L2/DDX24/POLR2A/METTL6/MRM1/TRMO/BRIP1/UPF1/NSUN6/RPP30/ENDOU/DDX3Y/TYW5/RPP21/DCPS/TRMT61A/CPSF3/DDX18/TRNT1/MRM2/POP4/ENDOV/…
GOMF_ENDORIBONUCLEASE_ACTIVITY	GOMF_ENDORIBONUCLEASE_ACTIVITY	59	0.453637	1.5994	0.000271682	0.034155	0.0293373	8891	tags=76%, list=48%, signal=40%	ERN2/SLFN13/ZC3H12B/SMG6/RNASEK/ZC3H12C/ZC3H12D/RNASEL/RNASEH2A/NYNRIN/RNASEH1/TSEN34/RPP30/ENDOU/RPP21/CPSF3/POP4/ENDOV/ERN1/DICER1/RIDA/SND1/DBR1/TSNAX/AGO3/RCL1/YBEY/EDC3/APEX1/ELAC2/RNASE1/TSN/TSEN2/FEN1/PIWIL1/POP1/MRPL44/RNASET2/RPP38/ZC3H12A/RPP40/NOB1/NUDT16/KHNYN/LACTB2
GOBP_RESPONSE_TO_INTERLEUKIN_1	GOBP_RESPONSE_TO_INTERLEUKIN_1	195	0.360634	1.38192	0.000280253	0.0343581	0.0295117	8288	tags=57%, list=44%, signal=32%	IL1A/IL1RL2/NOD2/CCL23/SNCA/IL6/CCL26/CCL8/IL1RN/IL1R2/HNMT/CCL22/ZBP1/MAPK3/GBP3/CCL25/CCL24/EPO/ABCC2/PSMB10/PSMC1/MAP3K3/UBE2V1/LGALS9/IRAK3/PTGIS/MTHFR/UPF1/PSMA6/HDAC4/PSME4/PSME2/TAB3/PSMB3/SMPD1/IRAK1/TAB1/PSME3/CCL2/SKP1/PYCARD/PSMC6/YY1/CCL21/RPS6KA4/CACTIN/MAPK13/RBMX/PSMC4/PSMB8/RC3H1/PRKCI/ZNF675/PSMD13/UBA52/PSMC2/CCL20/IRAK2/CCL4/NKX3-1/PLCB1/ETS1/AKAP12/PSMD11/SOX9/PSMD3/PSMB7/OTUD…
GOBP_CELL_CYCLE_G1_S_PHASE_TRANSITION	GOBP_CELL_CYCLE_G1_S_PHASE_TRANSITION	261	0.345322	1.33924	0.000289366	0.0343581	0.0295117	9110	tags=57%, list=49%, signal=30%	TRIM71/C10orf99/CYP1A1/CDKN2A/KCNA5/PRIM2/MUC1/ORC1/CNOT1/BRD7/CDT1/BCAT1/CRADD/CCNE1/POLE/TNKS1BP1/ARID3A/ZNF324/POLA2/ACVR1/NACC2/PKD1/BTG2/CDKN2D/E2F4/MCM8/MEPCE/CDK4/SENP2/CDK18/ID2/RBL1/CDK5/TAF1/ADAM17/CARM1/CACUL1/CDC25C/CDK6/KANK2/ZNF385A/TRIM39/TYMS/INO80/CCNA1/POLA1/PRMT1/PSME2/GMNN/PLK3/MDM4/CDK2AP2/CCNA2/FBXO7/PSME3/PAF1/CCL2/CDC25A/KMT2E/EIF4EBP1/CDC6/EGFR/EP300/DDX3X/CNOT6/AURKA/ORC…
GOBP_CELL_CYCLE_G2_M_PHASE_TRANSITION	GOBP_CELL_CYCLE_G2_M_PHASE_TRANSITION	268	0.343655	1.33298	0.000289366	0.0343581	0.0295117	10489	tags=66%, list=56%, signal=29%	TUBB4A/HUS1B/TUBA4A/DBF4B/BRCA1/ORC1/CENPJ/CEP131/PKMYT1/PLK1/AJUBA/CEP72/CDC25B/PSMB10/NES/PSMC1/ZFYVE19/DCTN1/DTL/SMARCD3/CEP192/CDK4/ATAD5/NAE1/SYF2/CEP152/CDC25C/DYNC1H1/TRIM39/NEK2/FBXL12/PSMA6/PPME1/TAOK3/LCMT1/PSME4/PPP2R2A/PSME2/TUBA1A/PLK3/HMMR/VPS4A/PSMB3/CSNK1E/CCNA2/BRCC3/MASTL/NEDD1/PSME3/NABP2/CDC25A/CCNY/SKP1/CDC6/FAM122A/AURKA/CCNB2/AURKB/PSMC6/DYRK3/SKP2/ENSA/PPP1R12A/CDC7/MIIP/P…
GOBP_VESICLE_LOCALIZATION	GOBP_VESICLE_LOCALIZATION	220	0.353828	1.36193	0.000293923	0.0343581	0.0295117	9010	tags=59%, list=48%, signal=31%	MYO1A/HAP1/GRIA1/MYO7B/TPGS1/TRAPPC5/ASIP/BBS2/MREG/MX2/TCIRG1/BICDL1/CEP19/GOSR2/PRKCZ/TGFA/MYO1F/SHROOM2/C17orf75/KIF5C/BICDL2/RAB27B/NLGN2/TRAPPC2/MYO15A/DYNC1I1/YKT6/AP3M2/GBF1/DNM1/EXOC4/CDH2/BBS7/AP3D1/CDK5/TANC2/GORASP1/MYO19/PPP6R1/TMED10/DYNC1H1/GOSR1/CLASP2/VPS33A/PSEN1/KIF5A/TESK1/AP3S2/BLOC1S6/MYO1C/ARL6/CHP1/SNAP23/BBS5/TRAPPC6A/PEF1/F8/TBC1D23/LMAN1/SEC24B/TRAPPC9/AP3M1/SLC2A4/SEC22…
GOMF_TRANSCRIPTION_COREPRESSOR_ACTIVITY	GOMF_TRANSCRIPTION_COREPRESSOR_ACTIVITY	176	0.364675	1.39181	0.000303037	0.0346471	0.02976	9699	tags=65%, list=52%, signal=31%	NR0B2/TLE6/PARP15/MLIP/CRYM/BRD7/TRERF1/AJUBA/RCOR3/LMCD1/BEND6/BTG2/AASS/TRIM22/SUFU/SIRT7/RUNX1T1/HDAC3/CBFA2T2/KDM5B/ATN1/DNAJB1/PARP9/FHL2/SIN3B/HDAC4/GMNN/TBL1X/YAP1/BCOR/SIAH2/ZMYND8/RUVBL2/HIPK2/HSPA1A/SFMBT1/TSG101/MAP3K10/JAZF1/RBFOX2/PIAS1/DMAP1/HDGF/APEX1/N4BP2L2/CASP8AP2/MED1/DR1/SRSF2/URI1/CREBBP/PAWR/RBBP8/HDAC1/MTA1/TRIM28/IRF2BP2/PIAS4/EID2/MTA3/MIER1/CTBP2/DNMT3B/RB1/TAF9B/MYBBP1…
GOCC_MYOSIN_FILAMENT	GOCC_MYOSIN_FILAMENT	21	0.596835	1.80547	0.000306796	0.0346471	0.02976	1575	tags=43%, list=8%, signal=39%	MYBPH/MYH8/MYH7/MYH6/MYBPC2/MYH1/MYH2/MYOM2/MYOM1
GOMF_GTPASE_ACTIVITY	GOMF_GTPASE_ACTIVITY	293	0.335407	1.3054	0.000321264	0.0356764	0.0306441	9933	tags=62%, list=53%, signal=29%	GNG8/TUBB4A/RAB40AL/RAB44/TUBB1/RGS6/GNG3/RASL10B/RERGL/TUBA8/TUBA4A/IRGM/MX2/RAB25/RAB5C/RABL2A/EEF1A2/GBP3/GNA11/RRAGB/RHOH/ATL1/RHOB/RASL10A/RAB27B/RGS12/RERG/RHOBTB1/GNGT2/GNA12/GNAO1/RAB35/DNM1/NRAS/DRG2/RAB32/GNAZ/RGS7/LSG1/RGS9/GTPBP4/RGS14/RALB/MFN1/RASA1/ARL2/RHOC/TUBB2A/RAB40C/IFT22/TUBA1A/RAC2/TUBB6/RAN/EFL1/ARL6/RAB24/RASD1/GNAI3/RRAGC/RGS5/SRP54/DDX3X/RAB14/RALA/RAC1/RAB13/GNA13/RAB2…
GOBP_PHOSPHATIDIC_ACID_METABOLIC_PROCESS	GOBP_PHOSPHATIDIC_ACID_METABOLIC_PROCESS	50	0.468594	1.61725	0.000336616	0.0367684	0.0315821	5919	tags=54%, list=32%, signal=37%	PLA2G2F/GPD1/PLA2G4D/PLA2G10/GPAT3/ABHD8/LPCAT4/GPAM/DGKE/DGKA/DGKG/DGKZ/PLA2G6/GPAT4/DGKD/AGPAT3/PLA2G4A/ABHD4/PLA2G12A/AGPAT5/DDHD1/LCLAT1/GNPAT/PLD2/PLA2G1B/AGPAT2/ABHD5
GOBP_REGULATION_OF_LEUKOCYTE_MIGRATION	GOBP_REGULATION_OF_LEUKOCYTE_MIGRATION	200	0.356612	1.36824	0.000344049	0.0369537	0.0317412	8117	tags=54%, list=44%, signal=31%	AIRE/C10orf99/S100A14/S100A7/NOD2/DEFB124/C5AR2/IL6/IL23A/GCSAML/CCR2/EDN2/MMP28/ITGA2/CD200R1/ITGA2B/ADTRP/DUSP1/CCL8/TNF/DPP4/PADI2/MPP1/FUT9/NBL1/RIPOR2/CD99L2/MAPK3/LGMN/RHOH/CCL25/CCL24/JAM3/ADA/ZNF580/TIRAP/LGALS9/CXCR3/AGER/GPSM3/PTK2B/IL6R/CREB3/ADAM17/CXCL12/P2RY12/LRCH1/OXSR1/CRKL/CSF1R/TNFRSF14/RAC2/WNK1/EMILIN1/ECM1/SWAP70/CCL2/ADAM10/AKIRIN1/STK10/HOXA7/PYCARD/TREM2/CALR/C3AR1/RIPK3/…
GOCC_SPINDLE_POLE	GOCC_SPINDLE_POLE	159	0.362027	1.37349	0.000353162	0.0369537	0.0317412	8033	tags=55%, list=43%, signal=31%	RASSF10/DNAAF1/POC1A/DDX11/CEP19/CEP89/PLK1/FBF1/TUBGCP2/CDC25B/CEP85/KATNAL2/DCTN1/DYNC1I1/RMDN3/RASSF1/FAM161A/GPSM2/CEP104/BEX4/RGS14/CEP44/AURKC/NEK2/TACC3/NUMA1/NUP62/PPP2CB/STAG1/PLK3/VPS4A/IK/PRC1/BRCC3/SPAG5/NEDD1/KLHL21/CDC6/CALM2/AURKA/AURKB/SMC3/SBDS/GOLGA2/NEK7/YPEL5/CENPF/CKAP2/KATNAL1/SGO1/NPM1/WDR73/CSPP1/LATS2/MAPK14/ODF2/MAD1L1/TUBGCP5/CUL3/ALMS1/TUBGCP4/CALM1/NDE1/UXT/FAM110C/CD…
GOCC_STAGA_COMPLEX	GOCC_STAGA_COMPLEX	12	0.70309	1.89386	0.000354951	0.0369537	0.0317412	4185	tags=58%, list=22%, signal=45%	TAF6L/TADA3/SUPT3H/KAT2A/TADA1/TAF5L/TADA2B
GOBP_ESTABLISHMENT_OF_ORGANELLE_LOCALIZATION	GOBP_ESTABLISHMENT_OF_ORGANELLE_LOCALIZATION	422	0.321439	1.26656	0.00037139	0.0376235	0.0323165	9348	tags=57%, list=50%, signal=29%	MYO1A/HAP1/AGBL4/SLIT1/GRIA1/MYO7B/MEIOC/NTN1/TLE6/LAT/TRAPPC5/ASIP/BBS2/SPIRE2/MREG/MX2/TCIRG1/BICDL1/BECN1/CEP19/GOSR2/PIK3CD/KIT/PLK1/CDT1/PRKCZ/TGFA/MYO1F/SHROOM2/CLMN/BTK/CDCA5/FHOD1/CENPC/C17orf75/CHMP7/KIF5C/BICDL2/DCTN1/RAB27B/TRAPPC2/LGALS9/MYO15A/DYNC1I1/YKT6/AP3M2/GBF1/IL4R/STXBP2/DNM1/EXOC4/BBS7/GPSM2/AP3D1/MLH1/CDK5/LSG1/TANC2/GORASP1/FER/MYO19/PPP6R1/NOP9/TMED10/DYNC1H1/GOSR1/CLASP2…
GOBP_HOMEOSTASIS_OF_NUMBER_OF_CELLS	GOBP_HOMEOSTASIS_OF_NUMBER_OF_CELLS	238	0.344114	1.32976	0.000375947	0.0376235	0.0323165	10186	tags=68%, list=55%, signal=31%	MPL/KLHL10/IL6/ARMCX1/ALAS2/LMO1/FOXN1/ILDR2/ADGRG1/TCIRG1/ETV2/PIK3CD/KIT/GPAM/JAM3/EPO/ADA/SH2B3/ZFP36L1/HOXA5/STAT5B/LGALS9/NOS3/LDB1/MAFB/CDH2/CCR4/FANCC/NCSTN/ADAM17/INPP5D/PPP2R3C/P4HTM/CDK6/NLE1/ARID4A/MAEA/ASXL1/PRMT1/EMCN/ARNT/LRRC19/ZFX/GAPT/BRD1/RC3H2/PPP3CB/ALAS1/HIPK2/HSPA1A/KMT2E/L3MBTL3/SOS1/CCNB2/ERCC2/DYRK3/GATA1/RIPK3/RBFOX2/UBAP2L/G6PD/ADGRF5/HMGB2/IKZF1/PTPN11/CEBPG/RC3H1/CD74…
GOBP_LEUKOCYTE_CELL_CELL_ADHESION	GOBP_LEUKOCYTE_CELL_CELL_ADHESION	340	0.328155	1.28449	0.000380504	0.0376235	0.0323165	8799	tags=54%, list=47%, signal=29%	PLA2G2F/LGALS9C/IL1A/IL1RL2/SFTPD/TNFRSF13C/NOD2/S100A9/CLECL1/IL6/IL23A/CCR2/PRKCQ/SIRPB1/ADTRP/NLRP3/DLG5/LAG3/MYB/TFRC/TNF/DPP4/SHH/FUT9/PAK1/ZAP70/ICOS/RIPOR2/CD274/LILRB1/ERBB2/HHLA2/GPAM/PRKCZ/CTLA4/HFE/BMP7/ITGAL/RHOH/CCL25/EPO/ADA/VSIR/PNP/STAT5B/PPARA/LGALS9/IL4R/RASAL3/RARA/CCDC88B/AGER/ZBTB7B/AP3D1/SART1/CXCL12/CD5/SEMA4D/DUSP3/SDC4/TNFRSF14/FYN/CD4/NKAP/RAC2/WNK1/SYK/IRAK1/PODXL2/RC3H…
GOBP_PROTEIN_POLYUBIQUITINATION	GOBP_PROTEIN_POLYUBIQUITINATION	324	0.332423	1.29896	0.000389617	0.0376235	0.0323165	8478	tags=54%, list=45%, signal=30%	C10orf90/TRIM71/FBXW12/NOD2/MKRN3/FBXW10/MAGEL2/KLHL3/TRIM34/TRIM6/FBXO41/BRCA1/FBXW9/KLHL20/FOXF2/NMI/MIB2/FBXO10/HACE1/HERC6/UBE2S/DDB2/RNF183/AKTIP/FBXO32/PSMB10/PSMC1/FBXO11/DTL/RNF168/UBE2V1/TRIM22/RNF216/TRIM21/HUWE1/UBE3B/FBXL20/FBXW5/KLHL42/DZIP3/LNPEP/RNF165/HECW2/TAF1/SMURF1/PPIL2/ANAPC1/FBXO21/CDC26/RNF126/FBXL12/HECTD1/PSMA6/PRPF19/HERC5/RNF114/ANAPC11/PSME4/PSME2/IFI27/AMFR/SIAH2/RNF…
GOMF_MICROTUBULE_BINDING	GOMF_MICROTUBULE_BINDING	260	0.339974	1.31819	0.000389617	0.0376235	0.0323165	9013	tags=56%, list=48%, signal=29%	CEP295NL/C10orf90/DPYSL5/NEFM/SAXO1/TRIM54/S100A9/TPGS1/JAKMIP1/TRPV4/FSD1/SPAG8/CAPN6/MAP1LC3B2/HOOK2/APC2/JAKMIP3/MX2/PLK1/CLIP2/SPEF1/TIAM1/KIF24/TUBGCP2/MAP1A/CLIP4/KIF5C/KATNAL2/DCTN1/OGG1/DYNC1I1/CCDC181/MDM1/RMDN3/CCDC88B/DNM1/MAP1LC3C/FAM161A/MARK4/MID2/KIF7/RGS14/KIF27/CLASP2/CCDC88A/CEP44/NUMA1/KIF5A/PPP5C/DST/MAP1B/CHP1/PRC1/GAS2L1/SPAG5/MAPT/LZTS1/KRIT1/SGIP1/CEP350/SYBU/EML2/SBDS/EML…
GOBP_REGULATION_OF_RAS_PROTEIN_SIGNAL_TRANSDUCTION	GOBP_REGULATION_OF_RAS_PROTEIN_SIGNAL_TRANSDUCTION	188	0.358755	1.37181	0.000412402	0.0392547	0.0337177	7380	tags=51%, list=40%, signal=31%	EPS8L3/SYNPO2L/GPR20/GPR55/LRRD1/IQSEC3/RASA4/GPR18/ARHGEF18/PSD/GPR35/SYNGAP1/ADGRG1/RASGRP1/RIPOR2/RASGRF2/EPS8L1/ABCA1/IQSEC1/LPAR6/PSD4/CAVIN4/CYTH4/RGL2/DLC1/EPO/ARHGEF10/RALGPS1/EPS8L2/P2RY8/ARHGEF25/SGSM3/GBF1/ARFGEF2/RASAL3/ARRB1/ERBIN/AKAP13/AUTS2/KCTD10/KANK2/RASA1/NOTCH2/SPRY1/SHC1/NUP62/HEG1/CRKL/FBP1/DENND3/PPP2CB/ARHGAP17/OGT/KCTD13/SHOC2/TIMP2/MAPKAP1/DENND4B/RASA2/LRRC59/PSD3/PRAG…
GOBP_ACTIN_FILAMENT_ORGANIZATION	GOBP_ACTIN_FILAMENT_ORGANIZATION	414	0.320812	1.26334	0.0004443	0.0408162	0.0350589	10726	tags=65%, list=58%, signal=28%	NRAP/MYO1A/SYNPO2L/POF1B/ARHGAP40/ESPNL/FRMD7/ESPN/ACTA1/SHANK1/RFLNA/MYO7B/MAGEL2/TMSB15B/TLE6/ERMN/TRPV4/CCL26/ARHGEF18/TGFB3/SPIRE2/PLEKHH2/ELMO3/CGNL1/TTN/PAK1/CARMIL1/EPHA1/PFN4/ARHGAP6/MYO1F/SHROOM2/BAIAP2/FSCN1/RHOH/PLS1/FHOD1/CCL24/RHOB/DLC1/ADD3/JMY/COBL/ARHGEF10/LCP1/CORO7/TSC1/MYO15A/KPTN/RHOBTB1/GMFG/CDC42EP1/TRIOBP/SSH3/PTK2B/FLII/ARRB1/ID1/MSRB2/SVIL/BAIAP2L1/SYNPO/CXCL12/FER/MYO19/…
GOCC_I_BAND	GOCC_I_BAND	134	0.375026	1.40639	0.000453414	0.0408162	0.0350589	7126	tags=51%, list=38%, signal=32%	NRAP/SYNPO2L/MYH7/C10orf71/MYH6/KY/SMTNL2/TRIM54/SCN3B/SMTNL1/CASQ1/SMN2/KCNA5/OBSCN/RYR3/MYOZ3/ANK2/ANK1/AHNAK2/ITGB1BP2/LDB3/TTN/PAK1/FBP2/PDLIM2/CAVIN4/MTM1/FBXO32/KCNN2/FLNC/RTN2/CSRP2/SYNPO/FHL2/PSEN1/MYZAP/HDAC4/NEBL/DST/CFL2/PPP3CB/PALLD/PARVB/KRT8/KAT2B/PDLIM7/SORBS2/PPP1R12A/FBXO22/DES/CAB39/NEXN/DMD/JUP/PDLIM1/IGFN1/FRG1/SYNPO2/SCN8A/PRICKLE4/ANKRD2/PDE4B/BIN1/DNAJB6/PDLIM5/FHL5/PGM5/JP…
GOBP_NEGATIVE_REGULATION_OF_CELL_CYCLE_PROCESS	GOBP_NEGATIVE_REGULATION_OF_CELL_CYCLE_PROCESS	327	0.328856	1.28545	0.00045797	0.0408162	0.0350589	10599	tags=65%, list=57%, signal=28%	C10orf99/HUS1B/TEX14/CDKN2A/DUSP1/USP44/BRCA1/MUC1/ORC1/CNOT1/PLK1/HMGN5/BRD7/CDT1/CRADD/PHC1/BMP7/TNKS1BP1/ARID3A/NACC2/PSMB10/EHMT2/PSMC1/BTG2/ZFYVE19/RING1/ZFP36L1/DTL/CDKN2D/E2F4/CDK4/MDM1/RBL1/NAE1/CARM1/SYF2/CDC25C/ZWINT/CDK6/KANK2/NAA10/ZNF385A/AURKAIP1/TERF2/TRIM39/NEK2/PSMA6/PPP1R10/TAOK3/LCMT1/PSME4/PRMT1/PSME2/KAT2A/PLK3/MDM4/VPS4A/CDK2AP2/PSMB3/FBXO7/TPR/IK/BRCC3/PSME3/NABP2/MGA/CCL2/…
GOBP_NEGATIVE_REGULATION_OF_INTRACELLULAR_SIGNAL_TRANSDUCTION	GOBP_NEGATIVE_REGULATION_OF_INTRACELLULAR_SIGNAL_TRANSDUCTION	467	0.314665	1.2439	0.000462527	0.0408162	0.0350589	9315	tags=56%, list=50%, signal=29%	NPY2R/SERPINB3/SFRP5/DRD2/RASA4/CASTOR2/NLRP12/SPAAR/ABCA7/SPRED3/OTUD7A/KLHL31/NLRP3/DHX58/DLG5/DUSP1/MUC1/SYNGAP1/NOL3/BDKRB2/CGNL1/NPPA/DDIAS/RIPOR2/NMI/XDH/C1QTNF3/NLRC3/APLNR/PIK3IP1/AJUBA/PIN1/IFI35/BMP7/RHOH/MTM1/DLC1/EPO/SH2B3/CIT/NLRX1/CDKN2D/CAMK2N1/TSC1/ESR1/GPATCH3/PPARA/KPTN/DDIT4/RASAL3/MECOM/CHRNA10/HDAC3/SERPINE2/FIGNL1/TSC2/DGKG/FNIP1/CCDC22/ARRB1/SESN1/CREB3/DUSP18/MAPK7/CXCL12/…
GOBP_RECEPTOR_MEDIATED_ENDOCYTOSIS	GOBP_RECEPTOR_MEDIATED_ENDOCYTOSIS	260	0.338969	1.31429	0.000462527	0.0408162	0.0350589	9061	tags=58%, list=49%, signal=30%	APOA5/HTR1B/CXCR1/CACNG8/SFTPD/SH3GL3/DRD4/GRIA1/DRD2/SNCA/CXCR2/CD207/ASGR1/AMN/TMEM108/APOB/ACHE/DLG4/HBB/TFRC/FCHO1/MX2/STAB2/LILRB1/ARR3/ADRB2/HPR/HBA2/HBA1/HFE/LDLRAP1/AP1G2/GRK4/AP2A2/AP1S1/BMP2K/PI4KB/STAB1/ANKRD13D/ARC/LRP6/DNM1/CD36/ARRB1/CD14/APOC2/CLTB/LRP2/MTMR2/PLCG2/AP2B1/SNX17/CLTC/WDR54/LDLRAD3/NUMB/SYK/CD2AP/AP2M1/NEDD4/REPS1/VLDLR/AP4E1/RAMP2/DGKD/FCGR1B/GRK2/ANXA2/SGIP1/HIP1R/I…
GOBP_POSITIVE_REGULATION_OF_PROTEIN_CONTAINING_COMPLEX_ASSEMBLY	GOBP_POSITIVE_REGULATION_OF_PROTEIN_CONTAINING_COMPLEX_ASSEMBLY	244	0.341209	1.3187	0.000471686	0.0408162	0.0350589	8786	tags=55%, list=47%, signal=30%	TCL1A/NRG1/MMP1/SNCA/MAGEL2/CCL26/GNL3L/SPIRE2/TFRC/TNF/PAK1/CARMIL1/CDT1/ABCA1/AJUBA/CLEC7A/DDB2/BAIAP2/FSCN1/CCL24/JMY/LCP1/DCTN1/ESR1/TIRAP/CDH17/GMFG/CDC42EP1/MED25/FNIP1/PTK2B/CD36/GTF2H3/BAIAP2L1/FER/P2RY12/SCIN/DDB1/NUMA1/FAF1/ARL2/RHOC/NR1H2/MYO1C/SYK/TPPP3/LMOD1/CDH5/MAP1B/CREB1/MAPT/ERCC4/HSPA1A/ERCC1/HIP1R/DDX3X/PYCARD/TRIM27/FCHSD2/GMFB/ERCC2/PSMC6/SNX9/RAC1/CCL21/CXCL13/PARK7/ARPC4/V…
GOCC_CHROMOSOMAL_REGION	GOCC_CHROMOSOMAL_REGION	314	0.32942	1.28599	0.000471686	0.0408162	0.0350589	9091	tags=56%, list=49%, signal=29%	ZSCAN4/TEX14/ORC1/RTEL1/SMG6/POLD1/ACD/PLK1/CDT1/DMC1/TFIP11/CDCA5/REC8/ZBTB48/CENPC/SP100/KMT5C/DCTN1/TEN1/LRWD1/DYNC1I1/CFDP1/CENPM/MIS18A/SIRT2/DYNLT3/DOT1L/THOC1/SUGT1/NUP133/TINF2/ZWINT/CLASP2/TERF2/PSEN1/RIF1/UPF1/NEK2/DDB1/PPP1R10/PPP2CB/STAG1/SS18L1/CENPS/HAT1/SETX/MSH2/TPR/MEN1/SPAG5/NABP2/ERCC4/UVRAG/ERCC1/CENPA/POT1/SPC25/NCAPD2/XRCC6/NGDN/AURKB/PPP1CC/CENPW/SMC3/ORC2/SMC5/TERF2IP/TP53…
GOBP_POSITIVE_REGULATION_OF_LEUKOCYTE_MIGRATION	GOBP_POSITIVE_REGULATION_OF_LEUKOCYTE_MIGRATION	133	0.376767	1.41215	0.000480845	0.0410752	0.0352814	8043	tags=55%, list=43%, signal=31%	S100A14/S100A7/DEFB124/IL6/IL23A/CCR2/EDN2/ITGA2/ITGA2B/CCL8/TNF/RIPOR2/CD99L2/MAPK3/LGMN/CCL24/JAM3/ZNF580/TIRAP/LGALS9/AGER/GPSM3/PTK2B/IL6R/CREB3/ADAM17/CXCL12/P2RY12/OXSR1/CSF1R/TNFRSF14/RAC2/WNK1/SWAP70/ADAM10/AKIRIN1/PYCARD/TREM2/CALR/C3AR1/RAC1/CCL21/CXCL13/MCU/LBP/VEGFC/SELENOK/CD74/CCL20/CCL4/PTAFR/DNM1L/DOCK8/MOSPD2/STK39/C5AR1/CXCL10/BDKRB1/SERPINE1/CCL19/CX3CL1/CSF1/F2RL1/CXCL14/PDGFD…
GOBP_REGULATION_OF_PROTEIN_SERINE_THREONINE_KINASE_ACTIVITY	GOBP_REGULATION_OF_PROTEIN_SERINE_THREONINE_KINASE_ACTIVITY	468	0.315159	1.24593	0.000490003	0.0413278	0.0354983	10725	tags=65%, list=58%, signal=28%	TCL1A/PRKAG3/SERPINB3/GRM4/ERN2/NRG1/CHRNA7/DRD4/NOD2/WEE2/GNG3/SNCA/TDGF1/MST1R/SPRED3/ADRA2B/CDKN2A/AVPI1/NTRK3/DBF4B/CAMK1/TGFB3/PRKAR1B/DUSP1/IRGM/TNF/KSR1/PKMYT1/RASGRP1/NPPA/PAK1/TRIB2/KIT/ERBB2/ADRB2/PLK1/CCNO/CCNE1/MAPK10/TIAM1/TGFA/MAPK3/AJUBA/SERTAD1/BMP7/FGD2/EPHA4/SH2B3/PKD1/CIT/UBE2V1/CDKN2D/MAP2K7/CDK4/LRP6/AGER/PTK2B/ARRB1/DUSP18/HEXIM1/ADAM17/GTPBP4/DUSP16/PDGFB/AKAP13/RGS14/CCNT1…
GOBP_POSITIVE_REGULATION_OF_CELL_ACTIVATION	GOBP_POSITIVE_REGULATION_OF_CELL_ACTIVATION	321	0.330862	1.29207	0.000499162	0.041574	0.0357098	9520	tags=58%, list=51%, signal=29%	IL1A/CHRNB2/IL1RL2/MPL/TNFRSF13C/NOD2/CLECL1/IL6/IL23A/CCR2/PRKCQ/SIRPB1/NLRP3/FLT3LG/SOX15/MYB/TFRC/DPP4/SLC39A10/SHH/PAK1/ZAP70/ICOS/CD274/LILRB1/HHLA2/GPAM/LILRA5/PRKCZ/BTK/CLEC7A/CTLA4/RHOH/EPO/ADA/VSIR/PNP/KMT5C/STAT5B/TIRAP/LGALS9/EXOSC6/IL4R/RASAL3/RARA/CCDC88B/AGER/CD226/ZBTB7B/AP3D1/MLH1/SART1/TNFRSF4/INPP5D/PPP2R3C/CD5/RIF1/GAB2/TNFRSF14/FYN/CD4/IL13/NKAP/SYK/MSH2/CD46/CD70/CCL2/RUNX1/P…
GOBP_NEGATIVE_REGULATION_OF_MITOTIC_CELL_CYCLE	GOBP_NEGATIVE_REGULATION_OF_MITOTIC_CELL_CYCLE	297	0.333543	1.29899	0.000508321	0.0417737	0.0358813	9153	tags=57%, list=49%, signal=30%	HUS1B/WEE2/TEX14/MEIOC/CDKN2A/DUSP1/USP44/BRCA1/MUC1/TNF/ORC1/CNOT1/DDIAS/GAS1/PLK1/RAD9A/BRD7/CDT1/CRADD/FZD3/BMP7/TNKS1BP1/ARID3A/NACC2/PSMB10/PSMC1/BTG2/ZFYVE19/XPC/ZFP36L1/CDKN2D/E2F4/CDK4/RBL1/NAE1/CARM1/SYF2/CDC25C/ZWINT/CDK6/NLE1/KANK2/ZNF385A/EME2/AURKAIP1/TRIM39/PSMA6/PPP1R10/TAOK3/LCMT1/PSME4/PRMT1/PSME2/PLK3/MDM4/VPS4A/CDK2AP2/PSMB3/MSH2/FBXO7/TPR/IK/PSME3/NABP2/CCL2/SKP1/CDC6/EGFR/EP3…
GOBP_TELOMERE_MAINTENANCE_IN_RESPONSE_TO_DNA_DAMAGE	GOBP_TELOMERE_MAINTENANCE_IN_RESPONSE_TO_DNA_DAMAGE	13	0.681282	1.87404	0.000516019	0.0417737	0.0358813	5156	tags=85%, list=28%, signal=61%	RTEL1/ACD/TFIP11/DCLRE1C/TERF2/RIF1/ERCC4/ERCC1/TERF2IP/APEX1/DCLRE1B
GOBP_POSITIVE_REGULATION_OF_CATECHOLAMINE_SECRETION	GOBP_POSITIVE_REGULATION_OF_CATECHOLAMINE_SECRETION	13	0.678469	1.8663	0.000526039	0.0417737	0.0358813	4031	tags=46%, list=22%, signal=36%	NPY2R/VIP/CHRNB2/CARTPT/CXCL12/GRK2
GOCC_ACTIN_CYTOSKELETON	GOCC_ACTIN_CYTOSKELETON	482	0.313614	1.24145	0.000526638	0.0417737	0.0358813	10109	tags=59%, list=54%, signal=28%	ACTBL2/C10orf90/XIRP2/MYH8/MYO1A/GYS2/SYNPO2L/MYH7/MYO3A/TNNT1/MYH6/HAP1/POF1B/SMTNL2/MYH1/MYL2/ESPN/ACTA1/SMTNL1/RFLNA/SNCA/TNNC2/MYO7B/MST1R/PKNOX2/TNNI1/TRPV4/KLHL14/MYH2/DCDC2C/MYOZ3/APC2/CORIN/PLEKHH2/ACTL10/LDB3/CGNL1/VPS18/KLHL20/PAK1/CD274/CARMIL1/ABCB4/PDLIM2/ARHGAP6/CALB2/NEURL1B/PRKCZ/MYO1F/SHROOM2/HFE/BAIAP2/FSCN1/TNKS1BP1/PLS1/AFAP1L1/FHOD1/USH1G/JAM3/DLC1/DDR2/TMEM63B/COBL/LCP1/TEK/…
GOCC_COATED_VESICLE	GOCC_COATED_VESICLE	285	0.335522	1.30488	0.000535797	0.0420002	0.0360759	8864	tags=57%, list=48%, signal=30%	ENTHD1/CHRM2/SFTPD/SYT2/GRIA1/CD207/SFTPA1/APOB/MALL/TFRC/CD3G/FCHO1/STON2/VPS18/GOSR2/HBEGF/ADRB2/CFTR/ABCB4/TGFA/CTLA4/DENND1C/SYNRG/LDLRAP1/AP1G2/LMAN2/NRGN/SEC23B/RAB27B/AP1M1/AP2A2/AP1S1/CPNE6/STEAP2/RASSF9/AP1B1/RAB35/EPN1/SREBF2/HLA-C/YIF1A/COPZ2/CLTB/LRP2/TMED10/CCDC88A/VPS33A/VPS11/GOPC/AP2B1/CLTC/CD4/TEX261/NUMB/CD3D/AP2M1/ECE1/PEF1/F8/FCGR1B/LMAN1/FZD4/ADAM10/SEC24B/SGIP1/HAX1/VAMP3/HI…
GOMF_CADHERIN_BINDING	GOMF_CADHERIN_BINDING	313	0.329066	1.28452	0.000554114	0.042931	0.0368754	10666	tags=67%, list=57%, signal=29%	OLFM4/CDH22/PTPRH/TRIM29/CDH18/CDH15/CDH10/CDH24/EPS8L1/BAIAP2/FSCN1/TNKS1BP1/ACVR1/EFHD2/IST1/EPS8L2/TBC1D2/CDH17/YKT6/HCFC1/TBC1D10A/CDC42EP1/CDH2/BAIAP2L1/DNAJB1/TXNDC9/SNX5/PCMT1/ZC3HAV1/CALD1/CDH4/PSEN1/CHMP5/CTNNA1/CRKL/PPME1/PAK4/AFDN/EIF4H/NUMB/SH3GL1/CAPZB/EEF1G/RAN/CD2AP/GIGYF2/GPRC5A/EHD1/CDH5/USP8/SWAP70/CTNND1/GLOD4/CD46/IDH1/ANXA2/HSPA1A/PLIN3/CNN2/ESYT2/LARP1/HSP90AB1/EGFR/DDX3X/MP…
GOBP_NUCLEAR_TRANSPORT	GOBP_NUCLEAR_TRANSPORT	337	0.327689	1.28214	0.000627384	0.0475029	0.0408025	9501	tags=59%, list=51%, signal=29%	NXF3/CHP2/RGPD1/SMN2/RGPD3/MMP12/DDX25/CAMK1/MX2/SHH/SMG6/DHX38/POM121/HEATR3/RGPD8/CABP1/NUP210/PKD1/MBTPS1/SP100/MCM3AP/TSC1/SUFU/SIRT7/HDAC3/IPO13/IWS1/TSC2/CD36/SYMPK/CDK5/LSG1/SMURF1/CPSF4/DUSP16/ECT2/AKAP13/LZTS2/RGS14/THOC1/NOP9/NUP133/XPO5/NUTF2/PSEN1/UPF1/RBM22/RANBP3/CCHCR1/NUP62/PPP1R10/SRSF5/RIOK2/CPSF3/IFI27/FIP1L1/FAM53C/SYK/RAN/PRICKLE1/GEMIN8/NEDD4/EGR2/TPR/IPO8/CHP1/AGFG1/RNPS1/S…
GOBP_SIGNAL_TRANSDUCTION_BY_P53_CLASS_MEDIATOR	GOBP_SIGNAL_TRANSDUCTION_BY_P53_CLASS_MEDIATOR	259	0.340093	1.31811	0.000627384	0.0475029	0.0408025	9292	tags=60%, list=50%, signal=31%	PRKAG3/ATRIP/EDA2R/SPRED3/ACER2/BRCA1/MUC1/BDKRB2/CNOT1/MSX1/RAD9A/BRD7/CRADD/PRKAB2/PIN1/TNKS1BP1/ARID3A/WWOX/PRKAB1/EHMT2/JMY/BTG2/SP100/KAT5/E2F4/KAT6A/DDIT4/CHD3/CDK5/HEXIM1/TAF1/CARM1/PRKAA2/CDC25C/CDIP1/ZNF385A/BRIP1/PRMT1/TTC5/MBD3/TMEM109/BRPF1/SUPT16H/PLK3/MDM4/TAF11/TP53RK/MSH2/PERP/ING2/RFC3/PPP1R13B/HIPK2/TRIM24/EP300/PYCARD/CNOT6/AURKA/AURKB/TOP3A/DYRK3/CNOT6L/DYRK1A/SMYD2/RNF34/BARD…
GOBP_REGULATION_OF_SUPRAMOLECULAR_FIBER_ORGANIZATION	GOBP_REGULATION_OF_SUPRAMOLECULAR_FIBER_ORGANIZATION	348	0.325677	1.27641	0.00065486	0.0480908	0.0413074	10832	tags=66%, list=58%, signal=28%	SYNPO2L/TUBB4A/CHRNA7/ARHGAP40/TRIM54/FRMD7/SHANK1/SNCA/MAGEL2/TMSB15B/TRPV4/CCL26/ARHGEF18/TGFB3/SPIRE2/APC2/PLEKHH2/CGNL1/PAK1/CARMIL1/EPHA1/PFN4/SPEF1/ARHGAP6/INPP5J/BAIAP2/FHOD1/MAP1A/CCL24/DLC1/ADD3/JMY/ARHGEF10/DCTN1/TSC1/GMFG/CDC42EP1/TRIOBP/SSH3/PTK2B/FLII/ID1/SVIL/BAIAP2L1/SYNPO/CXCL12/FER/AKAP13/CLASP2/CCDC88A/RASA1/PSEN1/SSH1/COTL1/SCIN/NUMA1/SDC4/TESK1/MID1IP1/ARL2/RHOC/NF2/CAPZB/MYO1…
GOMF_PHOSPHOPROTEIN_BINDING	GOMF_PHOSPHOPROTEIN_BINDING	87	0.410312	1.49141	0.00065486	0.0480908	0.0413074	8196	tags=61%, list=44%, signal=34%	TRPV1/SNCA/GPRIN1/ZAP70/ARR3/MAPK3/PIN1/PCIF1/LDLRAP1/PLAT/SHE/ARRB1/MID2/VAV2/RASA1/PLCG2/SHC1/SHB/CRKL/PIK3R3/PRKCSH/THRAP3/SYK/NEDD4/CBLB/PTPN5/FGR/SCAF4/GRB2/LCK/YWHAB/PTPN11/LRP11/RRAGA/NCK2/PTPN6/URI1/SHF/SH3BP2/RB1/LEO1/LYN/TOX3/CRK/YWHAE/SRC/SH2D3C/ABL2/CBL/SHD/TBL2/PIK3R2/EPB41
GOBP_MACROPHAGE_ACTIVATION	GOBP_MACROPHAGE_ACTIVATION	94	0.39544	1.4466	0.000664019	0.0480908	0.0413074	9023	tags=62%, list=48%, signal=32%	IL31RA/PLA2G10/SNCA/IL6/AZU1/EDN2/TLR7/TNF/SPHK1/NMI/IFI35/TLR3/IL4R/AGER/TLR2/IL13/SYK/MAPT/CRTC3/TREM2/FOXP1/FCGR2B/PLA2G4A/ADGRF5/LBP/VSIG4/CD74/BPI/JAK2/CTSC/MFHAS1/C5AR1/PTPRC/PJA2/IFNGR1/ATM/TICAM1/MIF/CX3CL1/MYO18A/HSPD1/GRN/CLU/HAMP/TNIP2/NR1D1/RORA/APP/TLR4/ITGB2/TYROBP/TLR6/ZC3H12A/CD200/IFNG/TLR1/DYSF/C1QA
GOBP_NEGATIVE_REGULATION_OF_CYTOSKELETON_ORGANIZATION	GOBP_NEGATIVE_REGULATION_OF_CYTOSKELETON_ORGANIZATION	145	0.371549	1.40138	0.000664019	0.0480908	0.0413074	8786	tags=58%, list=47%, signal=31%	TUBB4A/TRIM54/FRMD7/SHANK1/SNCA/TMSB15B/ARHGEF18/BRCA1/APC2/PLEKHH2/CGNL1/CARMIL1/PFN4/SPEF1/ARHGAP6/INPP5J/DLC1/ADD3/MDM1/GMFG/TRIOBP/SSH3/FLII/SVIL/CLASP2/SSH1/SCIN/MID1IP1/KAT2A/CAPZB/LMOD1/TACSTD2/CDH5/MAP1B/SWAP70/HIP1R/MTPN/GMFB/KAT2B/EML2/DYRK1A/CAPG/SPTBN5/TMOD1/ARPIN/STMN1/TWF1/PRKCD/NPM1/CCNF/TMSB4X/ARHGAP28/MAP2/TMOD3/SPTBN1/PRKN/PIK3CA/TMEM67/INPP5K/AVIL/PAK2/SMAD4/HDAC6/RBM14/PPP1R9A…
GOMF_TRANSCRIPTION_COACTIVATOR_ACTIVITY	GOMF_TRANSCRIPTION_COACTIVATOR_ACTIVITY	253	0.338843	1.31165	0.000682336	0.0488861	0.0419905	10274	tags=64%, list=55%, signal=29%	IL31RA/TRIM31/PRDM16/PSMC3IP/BRCA1/CENPJ/PAGE4/LPIN3/BRD7/MAML2/TRERF1/TADA2A/TAF6L/WWOX/KDM5A/JMY/KAT5/SRA1/XPC/CALCOCO1/SMARCD3/TRIM22/KAT6A/PER2/HCFC1/TADA3/TRIM21/NCOA3/APBB1/SMARCC2/ARRB1/MMS19/MID2/CARM1/ARID5B/ATXN7L3/PRPF6/ZBED1/MED7/HCFC2/MED27/SMARCB1/WBP2/THRAP3/SUPT3H/BCL9/ASXL1/KAT2A/SS18L1/YAP1/TAF11/TADA1/DYRK1B/TACC1/SMARCD2/RBPMS/HIPK2/SMARCC1/SLC30A9/TRIM24/TAF5L/EP300/TADA2B/NC…
GOMF_OXIDOREDUCTASE_ACTIVITY_ACTING_ON_CH_OH_GROUP_OF_DONORS	GOMF_OXIDOREDUCTASE_ACTIVITY_ACTING_ON_CH_OH_GROUP_OF_DONORS	125	0.37599	1.40247	0.000691495	0.0490152	0.0421014	6330	tags=50%, list=34%, signal=33%	AKR1B15/GPD1/LDHC/ADH1A/ALDH3A1/AKR1B10/DHRS2/SDR9C7/ADH4/MIOX/LDHAL6A/HAO2/EHHADH/AKR7A3/ADH6/RDH5/HSD17B1/HSD17B3/CBR3/CHDH/HSD17B2/RDH11/HSD11B1/DHRS4/SORD/GPD2/HSD17B8/IDH3G/ADH1C/AKR1D1/AKR1C2/CRYL1/KCNAB2/RDH13/HSD17B10/DHRS3/PTGR2/HSD3B7/HSD11B2/CBR1/IDH1/MDH1/MDH2/IMPDH1/HMGCR/G6PD/IDH2/HSD17B13/IMPDH2/ME2/ALDH3A2/HSD3B1/ZADH2/DCXR/KCNAB1/FASN/PGD/CTBP2/AKR1C3/PTGR1/ABCC4/NSDHL
GOBP_TISSUE_MIGRATION	GOBP_TISSUE_MIGRATION	289	0.332769	1.29468	0.000709813	0.049784	0.0427618	9450	tags=57%, list=51%, signal=29%	PRSS3/ACTA1/TDGF1/FOXC2/ITGA2/ADTRP/KRT2/GPLD1/TNF/DPP4/CARD10/PIK3CD/KIT/HBEGF/RAB25/BCAS3/FGF7/CYP1B1/ATOH8/LGMN/IQSEC1/NANOS1/RHOB/ADAM9/STAT5A/SP100/MAP3K3/TEK/ZNF580/NOS3/PTK2B/ID1/PLPP3/ADAM17/PDGFB/PRKD2/KANK2/CLASP2/PDCD10/PLCG2/PLXND1/TESK1/NRP2/PIK3R3/HDAC5/TACSTD2/CDH5/STRAP/PTPRG/GPX1/ADGRB1/KRIT1/ITGB1BP1/TBXA2R/SERPINF1/PPARD/CEACAM1/CALR/EPPK1/PRCP/SOX18/FOXP1/RAC1/PIK3C2A/RAB13/MY…
GOBP_DNA_REPLICATION	GOBP_DNA_REPLICATION	273	0.334247	1.2981	0.00072813	0.050346	0.0432445	8841	tags=55%, list=47%, signal=29%	ATRIP/DBF4B/BRCA1/PRIM2/ORC1/RTEL1/DDX11/POLD1/MMS22L/RAD9A/DACH1/CDT1/CCNE1/CHAF1A/POLH/POLE/POLA2/RECQL5/HELB/RNASEH2A/EHMT2/KAT5/DTL/MCM8/POLD3/TBRG1/LRWD1/SENP2/ATAD5/SIRT7/POLD2/TONSL/FANCM/WIZ/NFIX/GTPBP4/RFC1/THOC1/CCDC88A/MSH3/EME2/TERF2/BRIP1/UPF1/ETAA1/FAF1/INO80/POLA1/ZNF365/GMNN/SUPT16H/CENPS/CCNA2/RFC3/NFIC/REPIN1/NFIA/KCTD13/CDC6/REV3L/EGFR/KIN/TOP3A/SMC3/ORC2/BARD1/RAC1/MAP2K4/CDC7…
GOMF_ENDONUCLEASE_ACTIVITY	GOMF_ENDONUCLEASE_ACTIVITY	113	0.383741	1.42046	0.000737289	0.050346	0.0432445	8891	tags=62%, list=48%, signal=33%	ERN2/DNASE1L3/SLFN13/ZC3H12B/APLF/SMG6/PELO/RNASEK/ZC3H12C/PMS2/DCLRE1C/ZC3H12D/RNASEL/RNASEH2A/OGG1/NYNRIN/RNASEH1/TSEN34/DNASE1/EME2/RPP30/ENDOU/RPP21/CPSF3/POP4/ENDOV/ERN1/DICER1/RIDA/ERCC4/ERCC1/SND1/DBR1/G3BP1/TSNAX/AGO3/RCL1/YBEY/EDC3/TATDN2/APEX1/ELAC2/RNASE1/MBD4/RPS3/RBBP8/TSN/TATDN1/PPP1R8/NTHL1/TSEN2/ENDOD1/RAD50/RAD51C/FEN1/ANKLE1/ZRANB3/PIWIL1/POP1/MRPL44/GEN1/RNASET2/RPP38/ZC3H12A/R…
GOBP_MEMBRANE_DOCKING	GOBP_MEMBRANE_DOCKING	179	0.354437	1.3532	0.000755606	0.050346	0.0432445	10447	tags=66%, list=56%, signal=29%	TUBB4A/STX1B/TUBA4A/CENPJ/CEP131/VPS18/NDRG4/CEP89/CFTR/PLK1/KIF24/FBF1/PPFIA3/CEP72/DCTN1/CEP192/YKT6/STXBP2/EXOC4/MARK4/CEP152/RALB/DYNC1H1/VPS33A/VPS11/NPHP1/NEK2/C2CD3/STX16/B9D1/BLOC1S6/TUBA1A/CSNK1E/SYTL2/CHP1/STX12/NEDD1/RPGRIP1L/ESYT2/VAMP3/CAV2/SNX3/RAB13/TMEM216/RAB12/CEP78/CEP162/CETN2/HAUS4/YWHAG/VTI1B/EXOC6/CEP41/PLEK/SNAP29/SCFD1/TSNARE1/USO1/TCTN3/STX17/EXOC6B/VCAM1/ODF2/NSF/PEX16/…
GOBP_NEGATIVE_REGULATION_OF_LOCOMOTION	GOBP_NEGATIVE_REGULATION_OF_LOCOMOTION	295	0.329016	1.28075	0.000755606	0.050346	0.0432445	9446	tags=56%, list=51%, signal=28%	CLDN19/SEMG1/PIP5KL1/DRD2/C5AR2/PTPRU/MMP28/CD200R1/ADTRP/TNN/DLG5/PLXNA3/DUSP1/TNF/DPP4/PADI2/ADGRG1/SHH/CARD10/NBL1/NDRG4/RIPOR2/ABHD6/ACVR1C/EPHA1/DACH1/SEMA4F/SPOCK3/SEMG2/ADORA2A/CYP1B1/PIN1/CCL25/RHOB/DLC1/ADA/SEMA3B/SP100/SEMA3F/CHRD/ATP1B2/SEMA4B/SPINT2/ENG/GTPBP4/CXCL12/PODN/SEMA4D/CLASP2/PDCD10/DUSP3/LRCH1/CTNNA1/RYK/AFDN/HDAC5/NF2/WNT3/EMILIN1/TACSTD2/ZMYND8/STRAP/RNF41/PTPRG/CCL2/ADGR…
GOBP_REGULATION_OF_LEUKOCYTE_CHEMOTAXIS	GOBP_REGULATION_OF_LEUKOCYTE_CHEMOTAXIS	116	0.385535	1.42971	0.000755606	0.050346	0.0432445	7904	tags=55%, list=42%, signal=32%	S100A14/S100A7/NOD2/DEFB124/C5AR2/IL6/IL23A/CCR2/EDN2/MMP28/DUSP1/DPP4/PADI2/MPP1/NBL1/RIPOR2/MAPK3/LGMN/JAM3/ZNF580/TIRAP/LGALS9/GPSM3/PTK2B/IL6R/CREB3/ADAM17/CXCL12/OXSR1/CSF1R/RAC2/WNK1/SWAP70/CCL2/ADAM10/AKIRIN1/CALR/C3AR1/RAC1/CCL21/C5/CXCL13/MCU/LBP/VEGFC/CD74/CCL4/DNM1L/MOSPD2/STK39/C5AR1/CXCL10/LYN/SERPINE1/CCL19/MIF/CSF1/F2RL1/CXCL14/PGF/VEGFD/XCL2/VEGFA/VEGFB
GOBP_POSITIVE_REGULATION_OF_NEUROGENESIS	GOBP_POSITIVE_REGULATION_OF_NEUROGENESIS	207	0.346132	1.32989	0.000764765	0.0504518	0.0433354	8653	tags=56%, list=46%, signal=30%	HAP1/RASSF10/ITPKA/LTA/DRD2/DCT/ASCL1/CHODL/IL6/NTN1/PLXNA3/MYB/TNF/ISLR2/SHH/IL1RAPL1/PAK1/KIT/PLAG1/LRP8/PARP6/TIAM1/FZD3/BHLHB9/EPHA4/IST1/SMARCD3/SERPINE2/TLR2/CXCL12/RGS14/LRP2/SEMA4D/TRPV2/CDH4/PLXND1/GDI1/SPINT1/SRRT/PRPF19/WNT3/ZNF365/NUMB/SS18L1/EGR2/MAP1B/MAPT/DICER1/MME/CUX1/EEF2K/CUX2/SERPINF1/LPAR3/PPP1CC/FAIM/ZNF335/RAB21/XRCC2/NRP1/HDAC2/BDNF/VEGFC/IL6ST/PRKCI/TNFRSF1B/DNM1L/NAP1L1…
GOBP_REGULATION_OF_TELOMERE_CAPPING	GOBP_REGULATION_OF_TELOMERE_CAPPING	26	0.539287	1.7023	0.000791315	0.0512496	0.0440206	6860	tags=69%, list=37%, signal=44%	PRKCQ/RTEL1/SMG6/MAPK3/MAP2K7/MAP3K4/TERF2/NEK2/NABP2/ERCC4/ERCC1/AURKB/NEK7/USP7/ATM/NBN/HNRNPD/RAD50
GOBP_CELLULAR_MODIFIED_AMINO_ACID_METABOLIC_PROCESS	GOBP_CELLULAR_MODIFIED_AMINO_ACID_METABOLIC_PROCESS	190	0.344978	1.32109	0.000792241	0.0512496	0.0440206	8466	tags=56%, list=45%, signal=31%	PLA2G2F/DUOXA2/GGTLC2/NAT8/FOXE1/PLA2G4D/DUOX2/PLA2G10/BHMT/PAX8/GGT6/PIPOX/GGT7/GSTA1/HOGA1/SLC5A5/GSTM2/DUOX1/TMLHE/MBOAT1/MTHFS/CRAT/LPCAT4/GGH/CRYM/PLA2G15/DMGDH/CHDH/VNN2/BBOX1/MFSD2A/ACADL/GATM/ALDH1L1/CPT1B/ABHD16A/CLIC5/CPT2/PANK2/SLC5A6/GSTM3/CROT/MTHFR/TYMS/GCLC/SLC19A1/EEF1G/HPGDS/GART/PLSCR1/CKMT1A/IDH1/GPX1/GSS/GSR/CNDP2/SHMT2/OPLAH/PLA2G4A/PARK7/PDZD11/G6PD/CKMT1B/PLA2G12A/DHFR/MED1…
GOCC_M_BAND	GOCC_M_BAND	24	0.558856	1.73481	0.00082616	0.0525981	0.045179	1575	tags=46%, list=8%, signal=42%	SMTNL2/KLHL41/SMTNL1/CMYA5/OBSCN/MYOM3/ANK2/ANK1/LRRC39/MYOM2/MYOM1
GOBP_TOLL_LIKE_RECEPTOR_SIGNALING_PATHWAY	GOBP_TOLL_LIKE_RECEPTOR_SIGNALING_PATHWAY	148	0.366141	1.38308	0.000828876	0.0525981	0.045179	9298	tags=58%, list=50%, signal=29%	BPIFB1/NLRP2B/S100A14/SFTPD/NOD2/S100A9/TLR10/SFTPA1/APOB/TLR7/NMI/BTK/IFI35/LGMN/IRF3/TLR3/ESR1/TIRAP/TLR5/RAB11FIP2/UNC93B1/CD36/TLR2/CD14/IRAK3/SMPDL3B/TAB3/LRRC19/IRAK1/TAB1/DDX3X/IRF1/CACTIN/LY96/IRF7/LBP/UBA52/IRAK2/UBE2D1/MAPKAPK2/AP3B1/OTUD4/LGR4/CTSL/CASP8/HSP90B1/MFHAS1/LYN/PJA2/PIK3AP1/UBE2D3/GRAMD4/TICAM1/SFTPA2/HSPD1/F2RL1/RIPK2/NFKBIA/IKBKE/LRRC14/PELI1/TNIP2/NR1D1/APPL1/MYD88/IKBKB…
GOCC_TRANSPORT_VESICLE	GOCC_TRANSPORT_VESICLE	385	0.319282	1.25371	0.000856353	0.053829	0.0462362	9496	tags=56%, list=51%, signal=28%	SYT10/TH/NTF4/DBH/HAP1/RAB40AL/SPX/SYT2/KIRREL3/SVOP/STX1B/ASTL/GRIA1/DRD2/DOC2A/GRIN1/SCGN/DLG4/SNCAIP/GALNT15/AZIN2/STON2/GOSR2/SYTL5/PRRT1/SYP/SYT17/TGFA/CLCN5/IQSEC1/SYNRG/AP1G2/NRGN/SEC23B/RAB27B/AP1S1/RAB11FIP5/YKT6/STEAP2/WDR7/RASSF9/SYNGR3/RAB35/SYTL1/TPRG1L/SREBF2/HLA-C/YIPF3/NCSTN/SCAMP2/COPZ2/YIPF1/CLTB/TMED10/GOSR1/CCDC88A/MTMR2/CNST/GOPC/PSEN1/SV2C/STX16/CLTC/BLOC1S6/SLC4A8/RAB40C/SY…
GOMF_WATER_TRANSMEMBRANE_TRANSPORTER_ACTIVITY	GOMF_WATER_TRANSMEMBRANE_TRANSPORTER_ACTIVITY	14	0.6517	1.82385	0.000877156	0.0546214	0.0469168	1223	tags=36%, list=7%, signal=33%	AQP10/AQP5/MIP/AQP11/SLC14A1
GOBP_SYNAPSE_ORGANIZATION	GOBP_SYNAPSE_ORGANIZATION	401	0.31667	1.24538	0.000966438	0.0590769	0.0507438	9496	tags=56%, list=51%, signal=28%	ACTBL2/IL1RAPL2/GRIN2B/LRRTM1/AMIGO3/CHRNB2/PCDH8/LRTM2/CHRNA7/NPAS4/ITPKA/GRID2/ERC2/PCDHB3/DRD1/KIRREL3/SLIT1/SHANK1/ADGRB3/NGEF/FRMPD4/PCDHB5/FLRT3/DRD2/SNCA/PCDHGC4/LRFN2/NTN1/PCDHB13/TMEM108/PCDHB4/ARHGAP22/ACHE/LRRN3/CAMK1/ZDHHC15/DLG4/DLG5/PCDHGC5/ADGRL1/TNF/SYNGAP1/LZTS3/ZNF804A/IL1RAPL1/SNTA1/GPC6/CACNB1/LRRC4/ELFN1/ERBB2/PRRT1/LRP8/PCDHB14/NFATC4/TIAM1/PIN1/LGMN/BHLHB9/PPFIA3/DMPK/EPHA4…
GOBP_TELOMERE_ORGANIZATION	GOBP_TELOMERE_ORGANIZATION	144	0.365933	1.37944	0.000966438	0.0590769	0.0507438	7759	tags=52%, list=42%, signal=31%	ZSCAN4/HUS1B/PRKCQ/GNL3L/PRIM2/RTEL1/SMG6/POLD1/ACD/CCNE1/TFIP11/MAPK3/POLE/TNKS1BP1/POLA2/DCLRE1C/ZBTB48/SP100/MAP2K7/POLD3/TEN1/POLD2/RFC1/YLPM1/DOT1L/MAP3K4/TINF2/TERF2/RIF1/UPF1/NEK2/PPP1R10/POLA1/ZNF365/RFC3/NABP2/ERCC4/ERCC1/HSP90AB1/POT1/XRCC6/AURKB/SMC5/TERF2IP/NAT10/CCT5/NEK7/PARN/APEX1/HDAC8/DCLRE1B/USP7/PML/HNRNPA1/ATM/NHP2/POLD4/TCP1/NBN/HNRNPD/RPA3/SRC/RAD50/TPRKB/NSMCE2/RAD51C/HNRNP…
GOMF_MISMATCHED_DNA_BINDING	GOMF_MISMATCHED_DNA_BINDING	14	0.648067	1.81369	0.00098618	0.0597134	0.0512906	4216	tags=57%, list=23%, signal=44%	PMS2/MSH5/XPC/MLH1/MLH3/MSH3/MSH2/PMS1
GOBP_POST_GOLGI_VESICLE_MEDIATED_TRANSPORT	GOBP_POST_GOLGI_VESICLE_MEDIATED_TRANSPORT	101	0.395125	1.45284	0.00100325	0.0597134	0.0512906	7119	tags=56%, list=38%, signal=35%	AMN/BBS2/KLHL20/GOSR2/BBS1/RBSN/AP1G2/CORO7/PKDCC/STEAP2/GBF1/ARFGEF2/CCDC93/EXOC4/CCDC22/AP3D1/VAMP5/SCAMP2/VPS13C/VPS52/CNST/GOPC/GOLGA7/CCDC91/RABEP1/SNAP23/EXOC2/VAMP3/GGA1/RAB14/AP4M1/VTI1B/EHD3/EXOC6/SCAMP1/SCFD1/EXOC6B/AP1AR/NSF/MYO1B/EXOC8/RABIF/GOLPH3/OSBPL5/RAB10/EXOC5/LAPTM5/EXOC1/LYPLA1/SORT1/SPTBN1/GOLPH3L/BLZF1/SYS1/GGA3/KRT18/RAB31
GOBP_ENDOTHELIAL_CELL_MIGRATION	GOBP_ENDOTHELIAL_CELL_MIGRATION	204	0.347196	1.33291	0.00102166	0.0597134	0.0512906	9450	tags=60%, list=51%, signal=30%	PRSS3/TDGF1/FOXC2/ADTRP/GPLD1/TNF/DPP4/CARD10/PIK3CD/BCAS3/CYP1B1/ATOH8/LGMN/RHOB/STAT5A/SP100/MAP3K3/TEK/ZNF580/NOS3/PTK2B/ID1/PLPP3/ADAM17/PDGFB/PRKD2/PDCD10/PLXND1/NRP2/PIK3R3/HDAC5/CDH5/GPX1/ADGRB1/KRIT1/ITGB1BP1/TBXA2R/SERPINF1/CEACAM1/CALR/PRCP/SOX18/FOXP1/RAC1/PIK3C2A/RAB13/MYH9/CXCL13/NRP1/SASH1/GPI/VEGFC/GADD45A/AAMP/PDCD6/JUP/PRKX/ETS1/SRPX2/GLUL/DNAJA4/PRKD1/TMSB4X/TNFSF12/FAP/SCARB1/N…
GOBP_REGULATION_OF_ENDOTHELIAL_CELL_MIGRATION	GOBP_REGULATION_OF_ENDOTHELIAL_CELL_MIGRATION	159	0.352829	1.33859	0.00102166	0.0597134	0.0512906	9402	tags=58%, list=50%, signal=29%	TDGF1/FOXC2/GPLD1/TNF/CARD10/PIK3CD/BCAS3/ATOH8/LGMN/RHOB/STAT5A/SP100/MAP3K3/TEK/ZNF580/NOS3/PTK2B/PLPP3/ADAM17/PDGFB/PRKD2/PDCD10/NRP2/HDAC5/ADGRB1/KRIT1/ITGB1BP1/TBXA2R/SERPINF1/CEACAM1/CALR/PRCP/FOXP1/RAC1/PIK3C2A/CXCL13/NRP1/SASH1/GPI/VEGFC/GADD45A/AAMP/PDCD6/JUP/ETS1/SRPX2/GLUL/DNAJA4/PRKD1/TMSB4X/SCARB1/NFE2L2/FUT1/SP1/PTPRM/SEMA5A/MEOX2/RIN2/HDAC9/APOE/DCN/SPRED1/GRN/SMOC2/BMP4/RHOJ/RRAS/…
GOMF_GUANYL_NUCLEOTIDE_EXCHANGE_FACTOR_ACTIVITY	GOMF_GUANYL_NUCLEOTIDE_EXCHANGE_FACTOR_ACTIVITY	194	0.351197	1.34595	0.00102166	0.0597134	0.0512906	8994	tags=58%, list=48%, signal=30%	PCP2/FRMD7/NGEF/MCF2/PLEKHG4B/ARHGEF18/OBSCN/HPS1/PSD/PLEKHG4/RASGRP1/RASGRF2/EPS8L1/RCBTB2/RAPGEFL1/TIAM1/IQSEC1/PSD4/ARHGEF40/FGD2/CYTH4/DENND1C/RGL2/DOCK6/ARHGEF17/ARHGEF10/RALGPS1/EPS8L2/NUCB1/ARHGEF25/HERC2/MON1A/TBC1D10A/GBF1/ARFGEF2/PLCD4/FNIP1/SBF1/VAV2/ECT2/AKAP13/DOCK4/RIC8A/CCDC88A/P2RY12/RIC8B/TRIO/SPATA13/DENND3/RASGRP3/ARHGEF9/RCC1L/PREX1/TBXA2R/SOS1/DENND4B/ITSN1/LAMTOR1/ABR/RALGDS…
GOBP_REGULATION_OF_CHROMATIN_ORGANIZATION	GOBP_REGULATION_OF_CHROMATIN_ORGANIZATION	167	0.352044	1.34133	0.00104007	0.0602607	0.0517607	8690	tags=57%, list=47%, signal=31%	NOS1/SNCA/PAX5/BRCA1/MYB/MUC1/PADI2/BRD7/MAPK3/TADA2A/KDM5A/PHF19/AASS/ZNF304/WDR61/THAP7/TADA3/IWS1/ARRB1/ZBTB7B/AUTS2/PRKD2/RIF1/MTHFR/SETD7/SMARCB1/WBP2/SETD5/KAT2A/MLLT3/BCOR/NIPBL/PYGO2/OGT/TPR/ING2/RUVBL2/PAF1/PPHLN1/KMT2E/TADA2B/TRIP12/ZNF335/JARID2/RPS6KA4/PARK7/UBR5/PHF8/CHEK1/SART3/RNF40/TRIM28/SPI1/MTF2/RPS6KA5/PRKD1/KAT7/UBE2B/MIER1/CHTOP/DNMT3B/CAMK2D/WDR5/DNMT1/PARG/ATM/NELFE/SETD1A…
GOCC_MITOCHONDRIAL_PROTEIN_CONTAINING_COMPLEX	GOCC_MITOCHONDRIAL_PROTEIN_CONTAINING_COMPLEX	240	0.335658	1.2967	0.00105848	0.0607986	0.0522227	9253	tags=59%, list=50%, signal=30%	COX6A2/BCKDHA/MRPS24/MTX3/WDR93/DNAJC11/C15orf48/MRPL38/CHCHD6/TOMM20L/APOOL/MCCC2/MRPL11/NDUFS6/MRPS31/MCCC1/NDUFS8/MFN1/AFG3L2/CHCHD3/HSD17B10/MTERF4/UQCC3/IMMT/MRPL21/MRPL46/MRPL49/MRPS7/BCKDK/MRPS12/PPIF/NDUFA10/MPV17L2/NDUFA11/UQCRQ/MRPS27/NDUFC1/MTX2/MRPS18B/SDHAF4/TIMM10B/NDUFA6/NDUFS3/NDUFB7/MRPS21/TOMM5/MRPL48/TOMM22/MRPS17/COX7C/VDAC1/TIMM17B/MICU2/NDUFA8/MRPL17/MRPL51/AGK/DBT/TOMM70/MC…
GOBP_CELLULAR_RESPONSE_TO_CHEMICAL_STRESS	GOBP_CELLULAR_RESPONSE_TO_CHEMICAL_STRESS	326	0.32283	1.26161	0.00109529	0.0618469	0.0531232	10350	tags=62%, list=56%, signal=28%	MPO/DHRS2/KCNC2/SNCA/GPR37L1/AQP5/IL6/SRXN1/TRPV4/MYB/GPX2/NOL3/SPHK1/BDKRB2/PAGE4/BECN1/MAPK3/BTK/CYP1B1/BMP7/ANKZF1/MGAT3/RHOB/EPO/NCF2/TXNRD2/ZFP36L1/ZNF580/NFE2L1/TSC1/CBX8/NOS3/REST/CD36/FANCC/P4HB/SIRT2/MAPK7/FER/ECT2/PRKAA2/PDCD10/OXSR1/TMEM161A/PPP5C/FYN/ARNT/PPIF/SIGMAR1/RCSD1/SETX/CCNA2/FBXO7/PYROXD1/ERN1/MAPT/MTR/HSPA1A/GPX1/AIFM2/EGFR/GSR/DDX3X/XRCC6/MAPKAP1/SLC2A4/RIPK3/HTRA2/SOD2/TB…
GOBP_FC_RECEPTOR_SIGNALING_PATHWAY	GOBP_FC_RECEPTOR_SIGNALING_PATHWAY	177	0.352514	1.34544	0.00109529	0.0618469	0.0531232	10048	tags=66%, list=54%, signal=31%	PIGR/LAT/PRKCQ/CD200R1/MYH2/FCER1A/CD3G/PAK1/KIT/MAPK10/MAPK3/BTK/BAIAP2/NFATC3/PSMB10/PSMC1/MAP2K7/VAV2/FER/PLCG2/SHC1/GAB2/PLA2G6/PSMA6/PSME4/FYN/PSME2/TAB3/MYO1C/SYK/PSMB3/PPP3CB/TAB1/PSME3/FCGR1B/SKP1/HSP90AB1/SOS1/PSMC6/FCER1G/WIPF3/FGR/FCGR2B/RAC1/MAP2K4/MALT1/ABI1/ARPC4/GRB2/NCKAP1/NFATC2/PSMC4/PSMB8/PSMD13/PSMC2/PRKCD/PLD2/PSMD11/PSMD3/FCGR3A/CYFIP1/PSMB7/PSMA2/ARPC5/PLPP4/PTPRC/PSMB1/PSM…
GOCC_RIBONUCLEOPROTEIN_GRANULE	GOCC_RIBONUCLEOPROTEIN_GRANULE	239	0.337571	1.30413	0.00113211	0.0633886	0.0544474	9283	tags=60%, list=50%, signal=30%	TRIM71/DDX4/RBFOX1/MYH1/TDRD5/SMN2/DDX25/ZC3H12B/SNCAIP/EDC4/CNOT1/PATL2/CPEB1/PABPC5/AJUBA/ZC3H12C/PMS2/APOBEC3C/BLNK/ZC3H12D/ZFP36L1/NYNRIN/DYNC1I1/TDRD7/FXR2/TRIM21/ARC/MAP1LC3C/DHX30/TDRKH/DCP1B/SYMPK/SYNE1/DIS3L2/DCP1A/PRKAA2/TNRC6B/TNRC6A/AGO1/UPF1/SHB/DDX3Y/PSMA6/DCPS/LARP4/TUBA1A/GIGYF2/ENDOV/RC3H2/MAPT/RBPMS/SAMD4B/HAX1/SARNP/LARP1/TAF5L/DDX3X/DYRK3/NFKBIZ/GRB7/PABPC4L/TARDBP/G3BP1/BARD1…
GOBP_POSITIVE_REGULATION_OF_CHEMOTAXIS	GOBP_POSITIVE_REGULATION_OF_CHEMOTAXIS	138	0.367122	1.3795	0.00115052	0.0638824	0.0548716	7904	tags=52%, list=42%, signal=30%	S100A14/S100A7/DEFB124/IL6/IL23A/AZU1/CCR2/EDN2/ITGA2/CCL26/NTRK3/ARTN/RIPOR2/TIAM1/MAPK3/LGMN/ZNF580/TIRAP/LGALS9/AGER/GPSM3/PTK2B/CCR4/IL6R/CREB3/ADAM17/CXCL12/PDGFB/PRKD2/P2RY12/OXSR1/CSF1R/RAC2/WNK1/SWAP70/ADAM10/AKIRIN1/TREM2/CALR/C3AR1/RAC1/CCL21/CXCL13/NRP1/MCU/LBP/VEGFC/F3/CD74/CCL4/DNM1L/MOSPD2/PRKD1/TMSB4X/STK39/C5AR1/CXCL10/SEMA5A/SERPINE1/CCL19/PPM1F/CSF1/F2RL1/SMOC2/CXCL14/PDGFD/PGF/…
GOBP_IMMUNE_RESPONSE_REGULATING_SIGNALING_PATHWAY	GOBP_IMMUNE_RESPONSE_REGULATING_SIGNALING_PATHWAY	387	0.317952	1.24871	0.00118733	0.0647891	0.0556503	8971	tags=56%, list=48%, signal=30%	MUC5B/MUC5AC/BTN1A1/CR2/MUC4/MUC12/KLRC1/CD19/C5AR2/MUC3A/PAX5/PIGR/GCSAML/LAT/MUCL1/MS4A1/PRKCQ/CD200R1/MYH2/FCER1A/BTNL9/BMX/GPLD1/MUC1/CD3G/MNDA/SLC39A10/PAK1/PIK3CD/ZAP70/KIT/LILRB1/HHLA2/MICB/MAPK10/TXK/MAPK3/BTK/CTLA4/BAIAP2/NFATC3/BLNK/BTN2A1/ADA/CLEC10A/PSMB10/PSMC1/CD33/MAP2K7/NCR3/SH2B2/NRAS/CD226/DGKZ/VAV2/FER/INPP5D/PRKD2/BTN3A3/PLCG2/DUSP3/PSEN1/ICAM2/SHC1/GAB2/PLA2G6/PSMA6/CRKL/PSME…
GOBP_PEPTIDYL_THREONINE_MODIFICATION	GOBP_PEPTIDYL_THREONINE_MODIFICATION	123	0.376761	1.40436	0.00118733	0.0647891	0.0556503	7693	tags=53%, list=41%, signal=31%	MYLK2/AZU1/SPRED3/GALNTL6/TRIM6/IRGM/SPHK1/PLK1/CDC42BPG/BMP7/TNKS1BP1/ULK1/ACVR1/CIT/DDIT4/CDK5/SIRT2/TAF1/PRKD2/S1PR2/OXSR1/GALNT16/WNK1/DYRK1B/GRK2/HIPK2/CLK1/CALM2/DYRK3/MAP3K10/DYRK1A/CSNK2A1/CAB39/EIF4G1/HIPK3/AXIN1/GALNT11/CHEK1/GALNT1/PRKCD/PRKD1/STK39/GALNT3/PRKAG2/CDC42BPA/CAMK2D/DYRK4/CALM1/TTK/SPRED2/INPP5K/TGFBR1/SPRED1/RIPK2/ACVR1B/VRK1/GALNT13/NLK/PARD3/PRKDC/CDC42BPB/PRKCA/EOGT/AP…
GOBP_PHAGOCYTOSIS	GOBP_PHAGOCYTOSIS	262	0.335818	1.30219	0.00120574	0.0647891	0.0556503	9348	tags=57%, list=50%, signal=29%	FCN2/XKR5/SFTPD/NOD2/MST1R/ABCA7/AZU1/SFTPA1/ITGA2/SIRPB1/MYH2/CEBPE/TNF/CD3G/SPHK1/XKR9/ELMO3/BECN1/PAK1/IRF8/MAPK3/ADORA2A/TXNDC5/CLEC7A/ITGAL/BAIAP2/RHOH/PEAR1/C4B/CD302/NCF2/LMAN2/RHOBTB1/RARA/RAB11FIP2/CD36/TLR2/CD14/VAV2/PLCG2/PLA2G6/XKR6/FYN/MYO1C/RAC2/SYK/TUSC2/PLSCR1/TULP1/CCL2/ADGRB1/HSP90AB1/PYCARD/MEGF10/TREM2/CALR/ARHGAP12/FCER1G/RAB14/WIPF3/FGR/FCGR2B/SNX3/RAC1/ABI1/MYH9/ARPC4/GRB2/…
GOBP_REGULATION_OF_INNATE_IMMUNE_RESPONSE	GOBP_REGULATION_OF_INNATE_IMMUNE_RESPONSE	298	0.325025	1.26594	0.00120574	0.0647891	0.0556503	8971	tags=57%, list=48%, signal=30%	MUC5B/MUC5AC/NCR1/MUC4/NOD2/MUC12/DRD2/KLRC1/MMP12/MUC3A/MUCL1/TRIM6/DHX58/LAG3/IRGM/MUC1/MNDA/RASGRP1/PAK1/LILRB1/NMI/NLRC3/ZBP1/LRP8/TXK/IFI35/IRF3/COCH/RNASEL/CLEC10A/PSMB10/PSMC1/NLRX1/STAT5B/TIRAP/LGALS9/POLR3B/NCR3/TRIM21/POLR3F/NRAS/CD226/HEXIM1/PARP9/IRAK3/PLCG2/ICAM2/PSMA6/PSME4/FYN/PSME2/TAB3/NR1H2/PSPC1/SYK/PSMB3/PLSCR1/TAB1/PSME3/SKP1/ERAP1/HSP90AB1/EP300/PYCARD/TREM2/XRCC6/CEACAM1/IR…
GOBP_PROTEIN_CONTAINING_COMPLEX_DISASSEMBLY	GOBP_PROTEIN_CONTAINING_COMPLEX_DISASSEMBLY	320	0.324492	1.26701	0.00124256	0.0662332	0.0568908	10805	tags=67%, list=58%, signal=29%	TRIM54/LIX1/TRPV4/SLN/MAP1LC3B2/IRGM/APC2/TNF/MRPS24/PLEKHH2/ADRB2/CARMIL1/MRPL38/SPEF1/TFIP11/KIF24/CLEC16A/RUBCNL/MAP1A/UBQLN4/ADD3/IST1/N6AMT1/NES/CHMP7/WNT8B/SMARCD3/DDIT4/LRP6/TBC1D25/MRPL11/TRIOBP/SMARCC2/MAP1LC3C/FLII/SVIL/MRPS31/PHF23/CLASP2/IRAK3/VPS33A/AURKAIP1/UPF1/MRPL21/SCIN/SMARCB1/CHMP5/MRPL46/MRPL49/MID1IP1/MFSD8/MRPS7/SH3GL1/SUPT16H/CAPZB/MRPS12/CFL2/GABARAPL1/LMOD1/VPS4A/CHMP3/S…
GOBP_VESICLE_DOCKING	GOBP_VESICLE_DOCKING	65	0.423521	1.50519	0.00129778	0.0680875	0.0584835	6174	tags=49%, list=33%, signal=33%	STX1B/VPS18/NDRG4/CFTR/PPFIA3/YKT6/STXBP2/EXOC4/RALB/VPS33A/VPS11/STX16/BLOC1S6/SYTL2/STX12/VAMP3/CAV2/RAB13/RAB12/VTI1B/EXOC6/PLEK/SCFD1/TSNARE1/USO1/STX17/EXOC6B/NSF/STXBP3/STX2/CTBP2/RAB10
GOCC_ENDOSOME_MEMBRANE	GOCC_ENDOSOME_MEMBRANE	488	0.308869	1.22367	0.00129778	0.0680875	0.0584835	11028	tags=66%, list=59%, signal=28%	ANXA8/SH3GL3/GPR62/GPR61/GRIA1/SPAAR/ABCA7/ATP6V0A4/CD207/AMN/TMEM108/GIMAP5/APOB/SORCS2/KREMEN2/OR51E2/SLC30A4/PSD/TLR7/TFRC/SLC26A7/MREG/SPHK1/TCIRG1/VPS18/BECN1/GOSR2/CD274/RILP/ERBB2/ADRB2/CFTR/ABHD6/INPP5B/ANTXR2/VAC14/SLC38A9/RAB5C/CLEC16A/MCOLN3/RBSN/CLCN5/FGD2/CYB561A3/MVB12B/EPHA4/SNX8/RHOB/TLR3/AP1G2/CHMP7/WDR91/RAB27B/AP2A2/VPS39/RAB11FIP5/STEAP2/ARC/LRP6/RAB11FIP2/RAB35/SLC29A3/HLA-C/…
GOBP_POSITIVE_REGULATION_OF_GRANULOCYTE_CHEMOTAXIS	GOBP_POSITIVE_REGULATION_OF_GRANULOCYTE_CHEMOTAXIS	27	0.528865	1.6757	0.0013108	0.0681361	0.0585252	6352	tags=59%, list=34%, signal=39%	S100A14/S100A7/IL23A/RIPOR2/TIRAP/RAC2/C3AR1/RAC1/CCL21/MCU/LBP/CD74/DNM1L/MOSPD2/C5AR1/CCL19
GOMF_PROTEIN_GLUTAMIC_ACID_LIGASE_ACTIVITY	GOMF_PROTEIN_GLUTAMIC_ACID_LIGASE_ACTIVITY	10	0.703801	1.82363	0.00131916	0.0681361	0.0585252	3152	tags=70%, list=17%, signal=58%	TTLL13P/TPGS1/TTLL6/TTLL1/TTLL11/TTLL7/TTLL5
GOCC_PROTEIN_ACETYLTRANSFERASE_COMPLEX	GOCC_PROTEIN_ACETYLTRANSFERASE_COMPLEX	91	0.403207	1.47058	0.00137141	0.0691977	0.0594371	8872	tags=60%, list=48%, signal=32%	ACTBL2/NAA11/TADA2A/TAF6L/KAT5/KAT6A/HCFC1/TADA3/KANSL1L/ATXN7L3/NAA10/NAA16/MRGBP/NAA38/SUPT3H/KAT2A/BRPF1/KANSL2/TADA1/BRD1/OGT/RUVBL2/MORF4L1/TAF5L/EP300/TADA2B/YEATS4/KAT2B/DMAP1/UBAP2L/ING5/DR1/CREBBP/MBIP/TAF5/NAA50/MEAF6/KAT7/WDR5/TAF9B/EPC1/TAF4/KANSL3/TAF2/MSL2/EPC2/POLE3/MORF4L2/NAA30/YEATS2/EP400/JADE1/TAF6/MSL3/RUVBL1
GOBP_NEGATIVE_REGULATION_OF_GENE_EXPRESSION_EPIGENETIC	GOBP_NEGATIVE_REGULATION_OF_GENE_EXPRESSION_EPIGENETIC	54	0.446321	1.55804	0.00137278	0.0691977	0.0594371	8870	tags=72%, list=48%, signal=38%	PHF19/SIRT2/DOT1L/RIF1/MTHFR/HDAC5/HAT1/PPHLN1/MORF4L1/TRIM27/JARID2/PPM1D/RBBP7/HDAC2/SPI1/MTF2/UBR2/UBE2B/MIER1/CREBZF/DPY30/DNMT3B/AEBP2/DNMT1/PCGF2/EPC1/SMCHD1/PCGF1/ASF1A/MPHOSPH8/ATAD2B/MORF4L2/SIN3A/KMT2D/PHF1/EZH2/BMI1/MSL3/DNMT3A
GOBP_POSITIVE_REGULATION_OF_RESPONSE_TO_EXTERNAL_STIMULUS	GOBP_POSITIVE_REGULATION_OF_RESPONSE_TO_EXTERNAL_STIMULUS	472	0.309265	1.22314	0.00138982	0.0691977	0.0594371	7910	tags=48%, list=42%, signal=29%	KLK7/MUC5B/S100A14/S100A7/MUC5AC/MUC4/NOD2/LTA/DEFB124/MUC12/S100A9/FFAR3/SNCA/MMP12/MUC3A/IL6/NLRP12/IL23A/AZU1/TLR10/CCR2/MUCL1/EDN2/ITGA2/CCL26/NTRK3/TRIM6/DHX58/LPL/LAG3/TLR7/IRGM/MUC1/TNF/MNDA/ARTN/RASGRP1/PAK1/RIPOR2/NMI/ZBP1/LILRA5/TIAM1/TXK/MAPK3/BTK/IFI35/LGMN/IRF3/COCH/CCL24/TLR3/CLEC10A/PSMB10/PSMC1/ZNF580/STAT5B/TIRAP/LGALS9/POLR3B/NCR3/AGER/GPSM3/POLR3F/NRAS/PTK2B/OSM/CD226/CCR4/IL6R…
GOBP_POSITIVE_REGULATION_OF_ESTABLISHMENT_OF_PROTEIN_LOCALIZATION	GOBP_POSITIVE_REGULATION_OF_ESTABLISHMENT_OF_PROTEIN_LOCALIZATION	323	0.321545	1.25588	0.00140823	0.0691977	0.0594371	9932	tags=60%, list=53%, signal=29%	CHP2/IL1A/NR0B2/PDZK1/ACHE/OR51E2/SLC51B/CAMK1/GPLD1/TGFB3/NMU/TNF/CENPJ/CEP131/SHH/TTN/PAK1/ERBB2/MYOM1/C1QTNF3/CFTR/HSPA1L/BCAS3/PRKCZ/ADORA2A/GPR68/TM7SF3/ADAM9/CD33/ANO1/CAMK2N1/NLGN2/ABLIM3/HUWE1/APBB1/HDAC3/SREBF2/OXCT1/TLR2/CDK5/ECT2/FIS1/TMED10/PDCD10/CNST/VPS11/NUTF2/PSEN1/BBC3/PLA2G6/RBM22/MIEF2/RIOK2/FYN/NR1H2/MYO1C/IL13/PLK3/RAC2/RAN/CD2AP/RNF31/OAZ2/TPR/CHP1/MICALL2/PPP3CB/PDX1/PPP1R…
GOBP_REGULATION_OF_LYMPHOCYTE_ACTIVATION	GOBP_REGULATION_OF_LYMPHOCYTE_ACTIVATION	415	0.313202	1.23334	0.00140823	0.0691977	0.0594371	8799	tags=52%, list=47%, signal=28%	PLA2G2F/LGALS9C/IL1A/CHRNB2/IL1RL2/SFTPD/MPL/TNFRSF13C/NOD2/CLECL1/CD19/IL6/IL23A/LAT/CCR2/PRKCQ/SIRPB1/LMO1/NLRP3/FLT3LG/DLG5/LAG3/FOXN1/MYB/TFRC/MZB1/GAL/DPP4/MNDA/SLC39A10/SHH/CYP26B1/PAK1/ZAP70/ICOS/RIPOR2/CD274/LILRB1/ERBB2/HHLA2/GPAM/PRKCZ/BTK/CLEC7A/CTLA4/HFE/RHOH/PRDM1/EPO/ADA/VSIR/PNP/KMT5C/ZFP36L1/STAT5B/TIRAP/LGALS9/EXOSC6/IL4R/RASAL3/RARA/CCDC88B/AGER/ZBTB7B/AP3D1/MLH1/SART1/TNFRSF4/I…
GOCC_ENDOLYSOSOME_MEMBRANE	GOCC_ENDOLYSOSOME_MEMBRANE	15	0.614491	1.73543	0.00141972	0.0691977	0.0594371	4287	tags=53%, list=23%, signal=41%	TLR7/CLEC16A/TLR3/AP2A2/AP2B1/CLTC/AP2M1/AP2S1
GOBP_MACROAUTOPHAGY	GOBP_MACROAUTOPHAGY	305	0.326567	1.27334	0.00142664	0.0691977	0.0594371	10716	tags=66%, list=57%, signal=29%	PRKAG3/NOD2/LIX1/KLHL3/MAP1LC3B2/IRGM/TCIRG1/BECN1/MTMR3/ATG101/ADRB2/HDAC10/ATG2A/SLC38A9/MAPK3/CLEC16A/PRKAB2/GPSM1/RETREG3/RRAGB/RUBCNL/MTM1/ULK1/UBQLN4/ATG16L2/PRKAB1/ZFYVE1/CAPN1/TP53INP2/TSC1/HUWE1/TBC1D25/MAP1LC3C/EXOC4/TSC2/SESN1/CDK5/UBXN6/SMURF1/SNX5/PRKAA2/PHF23/RALB/MFN1/VPS13C/QSOX1/ATG16L1/VPS33A/PSEN1/ATP6V1D/MFSD8/GABARAPL1/VPS4A/USP30/CHMP3/ATP6V0E2/ATP6V0A1/ATP6V1A/NEDD4/ATP6V1H…
GOBP_REGULATION_OF_ACTIN_FILAMENT_ORGANIZATION	GOBP_REGULATION_OF_ACTIN_FILAMENT_ORGANIZATION	256	0.331822	1.2855	0.00142664	0.0691977	0.0594371	9277	tags=57%, list=50%, signal=29%	SYNPO2L/ARHGAP40/FRMD7/SHANK1/MAGEL2/TMSB15B/CCL26/ARHGEF18/TGFB3/SPIRE2/PLEKHH2/CGNL1/PAK1/CARMIL1/EPHA1/PFN4/ARHGAP6/BAIAP2/FHOD1/CCL24/DLC1/ADD3/JMY/ARHGEF10/TSC1/GMFG/CDC42EP1/TRIOBP/SSH3/PTK2B/FLII/ID1/SVIL/BAIAP2L1/SYNPO/CXCL12/FER/CLASP2/CCDC88A/RASA1/SSH1/COTL1/SCIN/SDC4/TESK1/RHOC/NF2/CAPZB/MYO1C/CFL2/LMOD1/TACSTD2/SWAP70/PREX1/HAX1/ITGB1BP1/HIP1R/ESAM/PYCARD/TRIM27/FCHSD2/MTPN/GBA2/GMFB…
GOBP_AMINO_ACID_BETAINE_METABOLIC_PROCESS	GOBP_AMINO_ACID_BETAINE_METABOLIC_PROCESS	17	0.615496	1.78735	0.00143318	0.0691977	0.0594371	3047	tags=59%, list=16%, signal=49%	BHMT/TMLHE/CRAT/DMGDH/CHDH/BBOX1/ACADL/CPT1B/CPT2/CROT
GOBP_PEPTIDYL_LYSINE_METHYLATION	GOBP_PEPTIDYL_LYSINE_METHYLATION	114	0.37785	1.39923	0.00144504	0.0692685	0.0594979	8593	tags=56%, list=46%, signal=30%	METTL21C/PRDM16/PAX5/BRCA1/MYB/PRDM5/N6AMT1/EHMT2/KMT5C/PHF19/ZNF304/WDR61/SETD4/MECOM/IWS1/AUTS2/ETFBKMT/DOT1L/ARID4A/RIF1/SETD7/SMARCB1/SETD5/BCOR/PYGO2/PWP1/OGT/MEN1/CAMKMT/KMT2E/SETD2/SMYD2/ZNF335/JARID2/METTL21A/SETD1B/SETD3/MTF2/DPY30/DNMT3B/WDR5/DNMT1/TET3/NELFE/SETD1A/ASH1L/SETDB2/ASH2L/SMAD4/ZNF274/EEF1AKMT3/BRD4/CTR9/SNW1/BEND3/PAXIP1/TET2/KDM6A/KMT2D/KMT2B/RLF/PHF1/EZH2/KMT2A
GOMF_GLUTAMATE_RECEPTOR_ACTIVITY	GOMF_GLUTAMATE_RECEPTOR_ACTIVITY	26	0.525675	1.65933	0.00145869	0.0694234	0.059631	2707	tags=42%, list=15%, signal=36%	GRIN2B/GRM6/GRM4/GRM7/GRID2/GRIA1/GRIN1/GRIA3/GRIK2/GRIN2D/PTK2B
GOBP_MYELIN_ASSEMBLY	GOBP_MYELIN_ASSEMBLY	19	0.569525	1.68983	0.00147761	0.0698247	0.0599757	6477	tags=63%, list=35%, signal=41%	NCMAP/TLR2/MPP5/MTMR2/DICER1/ERCC2/GNPAT/TPPP/PIKFYVE/PMP22/MOBP/CNTNAP1
GOBP_PROTEIN_POLYMERIZATION	GOBP_PROTEIN_POLYMERIZATION	282	0.327108	1.27134	0.00150027	0.0703963	0.0604667	9074	tags=56%, list=49%, signal=29%	TUBB4A/ARHGAP40/SNCA/CASQ1/MAGEL2/TMSB15B/TRPV4/CCL26/TRIM6/SPIRE2/CENPJ/MX2/PAK1/CARMIL1/PFN4/ARHGAP6/UBE2S/INPP5J/BAIAP2/TUBGCP2/CCL24/ADD3/JMY/COBL/CORO7/DCTN1/CEP192/GMFG/CDC42EP1/TRIOBP/DNM1/SSH3/PTK2B/FLII/MSRB2/SVIL/BAIAP2L1/FER/CLASP2/RASA1/SSH1/COTL1/MIEF2/SCIN/NUMA1/GPX4/MID1IP1/ARL2/WASHC3/TTC17/CAPZB/MYO1C/TPPP3/LMOD1/CHMP3/ARL6/CDH5/MAP1B/MICALL2/MAPT/HSPA1A/PREX1/HAX1/HIP1R/ESAM/PYC…
GOBP_REGULATION_OF_CELL_CYCLE_G2_M_PHASE_TRANSITION	GOBP_REGULATION_OF_CELL_CYCLE_G2_M_PHASE_TRANSITION	212	0.341966	1.31427	0.00151868	0.0707618	0.0607805	10489	tags=67%, list=56%, signal=29%	TUBB4A/HUS1B/TUBA4A/DBF4B/BRCA1/ORC1/CENPJ/CEP131/PLK1/CEP72/CDC25B/PSMB10/PSMC1/ZFYVE19/DCTN1/DTL/SMARCD3/CEP192/CDK4/ATAD5/NAE1/SYF2/CEP152/CDC25C/DYNC1H1/TRIM39/NEK2/PSMA6/TAOK3/PSME4/PSME2/TUBA1A/HMMR/VPS4A/PSMB3/CSNK1E/BRCC3/NEDD1/PSME3/NABP2/CDC25A/SKP1/CDC6/FAM122A/AURKA/AURKB/PSMC6/DYRK3/CDC7/MIIP/CEP78/CETN2/HAUS4/YWHAG/CENPF/USP47/PSMC4/PSMB8/CEP41/PSMD13/PSMC2/CHEK1/NPM1/NEK10/ODF2/PSM…
GOBP_POSITIVE_REGULATION_OF_CATABOLIC_PROCESS	GOBP_POSITIVE_REGULATION_OF_CATABOLIC_PROCESS	437	0.309733	1.22189	0.00155549	0.0709879	0.0609748	10712	tags=65%, list=57%, signal=28%	APOA5/TRIM71/VIP/GPD1/NOD2/AGBL4/SNCA/IL6/KCNE2/ZBTB20/TRIM34/TRIM6/GPLD1/IRGM/APC2/TNF/ST20/CNOT1/BECN1/TRIB2/RILP/DAGLB/CDC20B/ADRB2/PLK1/HACE1/SNX33/MAPK3/GPSM1/NANOS1/ULK1/FTO/ZC3H12D/ADAM9/VSIR/PSMC1/BTG2/KAT5/TP53INP2/ZFP36L1/CPEB3/DTL/TSC1/TRIM22/PPARA/SGSM3/TRIM21/HUWE1/DHRSX/TSC2/BBS7/PHKG2/PTK2B/CCDC22/NRDC/SESN1/SIRT2/HECW2/APOC2/MID2/TAF1/SMURF1/PRKAA2/TMTC3/LRP2/ZC3HAV1/RALB/TNRC6B/T…
GOBP_VIRAL_LIFE_CYCLE	GOBP_VIRAL_LIFE_CYCLE	330	0.324275	1.26788	0.00155549	0.0709879	0.0609748	9877	tags=58%, list=53%, signal=28%	SERPINB3/TRIM31/CR2/CLDN9/SLPI/ITGA2/TRIM34/TRIM6/PC/CCL8/TFRC/TNF/DPP4/OAS1/VPS18/POM121/IFIT1/SLC20A2/NUP210/APOBEC3C/ATG16L2/MVB12B/TARBP2/IST1/RNASEL/CHMP7/ANPEP/TRIM22/PPARA/LGALS9/TRIM21/IFIT5/P4HB/MID2/TNFRSF4/ZC3HAV1/NUP133/ATG16L1/ZBED1/DDB1/NUP62/SMARCB1/CHMP5/ILF3/TNFRSF14/CD4/IFI27/VPS4A/RAN/CHMP3/NEDD4/PLSCR1/TPR/SMPD1/TRIM26/CD46/NFIA/KPNA3/GRK2/CCL2/HSPA1A/UVRAG/LARP1/HSP90AB1/EGFR…
GOMF_TRANSFERASE_ACTIVITY_TRANSFERRING_ACYL_GROUPS	GOMF_TRANSFERASE_ACTIVITY_TRANSFERRING_ACYL_GROUPS	236	0.337092	1.30235	0.00155549	0.0709879	0.0609748	7671	tags=49%, list=41%, signal=29%	TGM7/HHATL/NAT8/ACSM6/LRAT/HTD2/AANAT/NAA11/HMGCS2/TGM1/GGT6/ASPG/MOGAT2/BAAT/ACSM2B/GGT7/ALAS2/ACSM5/LCAT/ZDHHC15/GPAT3/MBOAT1/ABHD8/NAT8L/CRAT/SPHK1/LPCAT4/PLA2G15/GPAM/HHAT/ZDHHC24/TADA2A/CPT1B/TAZ/KAT5/MCM3AP/KAT6A/YKT6/TADA3/NCOA3/SIRT7/CPT2/ELP3/TAF1/ZDHHC23/CROT/NAT9/NAA10/NAA16/ACAT1/KAT2A/BRPF1/HAT1/GOLGA7/BRD1/GPAT4/ALAS1/PAFAH1B2/PAFAH1B3/ZDHHC22/ZDHHC6/EP300/NCOA1/GTF3C4/SRCAP/ZDHHC21…
GOBP_PROTEIN_ACYLATION	GOBP_PROTEIN_ACYLATION	234	0.33748	1.30319	0.00159231	0.0721738	0.0619934	9104	tags=58%, list=49%, signal=30%	NOS1/HHATL/NAT8/AANAT/NAA11/SNCA/CAMK1/ZDHHC15/BRCA1/MUC1/SPHK1/BRD7/HHAT/MAPK3/ZDHHC24/TADA2A/TAF6L/KAT5/MCM3AP/KAT6A/THAP7/HCFC1/TADA3/KANSL1L/NCOA3/LDB1/APBB1/FAM161A/IWS1/ARRB1/TAF1/PRKAA2/AUTS2/ZDHHC23/NAT9/NAA10/NAA16/MRGBP/SMARCB1/WBP2/SETD5/SUPT3H/MBD3/KAT2A/BRPF1/HAT1/KANSL2/GOLGA7/TADA1/PYGO2/BRD1/OGT/RUVBL2/MAPT/MORF4L1/ZDHHC22/ZDHHC6/TAF5L/EP300/TADA2B/DDX3X/NCOA1/YEATS4/GTF3C4/SRCAP/…
GOBP_NATURAL_KILLER_CELL_ACTIVATION_INVOLVED_IN_IMMUNE_RESPONSE	GOBP_NATURAL_KILLER_CELL_ACTIVATION_INVOLVED_IN_IMMUNE_RESPONSE	20	-0.42272	-2.06757	0.00164361	0.0739956	0.0635583	1291	tags=40%, list=7%, signal=37%	PGLYRP2/IFNA6/IFNA4/IFNA1/IFNA5/IFNA13/IFNA16/IFNA7
GOMF_INWARD_RECTIFIER_POTASSIUM_CHANNEL_ACTIVITY	GOMF_INWARD_RECTIFIER_POTASSIUM_CHANNEL_ACTIVITY	20	0.569377	1.70724	0.00166552	0.0744788	0.0639732	3190	tags=45%, list=17%, signal=37%	KCNJ15/KCNJ12/KCNE2/KCNH2/ABCC8/KCNJ10/KCNK6/KCNJ5/KCNJ9
GOBP_RESPONSE_TO_TUMOR_NECROSIS_FACTOR	GOBP_RESPONSE_TO_TUMOR_NECROSIS_FACTOR	300	0.32465	1.2648	0.00168435	0.0748187	0.0642652	9399	tags=57%, list=50%, signal=29%	TCL1A/NLRP2B/GPD1/CRHBP/TNFRSF13C/LTA/CCL23/TDGF1/EDA2R/GGT7/CCL26/APOB/TNFRSF25/CCL8/BRCA1/TNF/NOL3/SPHK1/CCL22/MAPK3/UBD/GBP3/CCL25/CCL24/ABCC2/ADAM9/PSMB10/PSMC1/ZFP36L1/MAP2K7/TNFSF15/SPATA2/PID1/PTK2B/CD14/ADAM17/TNFRSF4/ERBIN/SGMS1/CDIP1/CARD16/PSMA6/HDAC4/TNFRSF14/PSME4/PSME2/KAT2A/SYK/RNF31/PSMB3/SMPD1/RBCK1/PSME3/CD70/CCL2/HSPA1A/ADAM10/GSS/PYCARD/SLC2A4/PSMC6/TNFSF8/KRT8/COMMD7/EDARADD/…
GOBP_REGULATION_OF_ACTIN_FILAMENT_BASED_PROCESS	GOBP_REGULATION_OF_ACTIN_FILAMENT_BASED_PROCESS	370	0.316135	1.24022	0.00173957	0.076255	0.0654989	10812	tags=65%, list=58%, signal=28%	SYNPO2L/MYLK2/ARHGAP40/EPHA5/FRMD7/SHANK1/MAGEL2/TMSB15B/CCL26/ARHGEF18/NTRK3/GRHL3/ATP2A1/TGFB3/ANK2/SPIRE2/PLEKHH2/CGNL1/PAK1/CELSR1/CARMIL1/EPHA1/BCAS3/PFN4/ARHGAP6/BAIAP2/FSCN1/RHOH/FHOD1/CCL24/RHOB/JAM3/DLC1/ADD3/JMY/ARHGEF10/TEK/TSC1/RHOBTB1/GMFG/CDC42EP1/TRIOBP/SSH3/PTK2B/FLII/ID1/CDK5/SVIL/BAIAP2L1/SYNPO/CXCL12/FER/DSP/ECT2/AKAP13/HCN4/CLASP2/CCDC88A/RASA1/NOTCH2/SSH1/COTL1/SCIN/SDC4/TESK…
GOCC_CELL_CELL_JUNCTION	GOCC_CELL_CELL_JUNCTION	474	0.305504	1.20882	0.00173957	0.076255	0.0654989	9853	tags=58%, list=53%, signal=28%	NRAP/CLDN19/DSG4/KIRREL2/AOC1/CLDN20/CLDN34/IGSF11/GJB5/CCDC85A/POF1B/CDH22/GJD3/CLDN9/MYH1/DSG3/KIRREL3/FLRT1/CADM3/TRIM29/FLRT3/FRMPD2/GJA3/CDH18/MIP/PTPRU/AJAP1/SCN4B/CRB1/TRPV4/MYH2/KCNA5/COL17A1/OBSCN/DSC3/CDH10/PCDH9/DLG5/CDH24/ANK2/DPP4/LAMA1/WNK4/LDB3/CGNL1/PAK1/ZAP70/KIT/CLDN15/ABCB4/CD99L2/PDLIM2/STARD10/CALB2/TIAM1/PRKCZ/AJUBA/PDZD2/SHROOM2/GJA9/BAIAP2/FSCN1/TNKS1BP1/FBF1/NHS/FHOD1/PLE…
GOBP_LEUKOCYTE_CHEMOTAXIS	GOBP_LEUKOCYTE_CHEMOTAXIS	218	0.339776	1.30763	0.00175798	0.0765583	0.0657594	9143	tags=58%, list=49%, signal=30%	CXCR5/CXCR1/C10orf99/S100A14/S100A7/SFTPD/CXCL5/NOD2/DEFB124/CCL23/S100A9/CXCR2/C5AR2/IL6/IL23A/AZU1/CCR2/EDN2/MMP28/CCL26/DUSP1/CCL8/DPP4/PADI2/CXCL2/MPP1/CCL22/NBL1/PIK3CD/RIPOR2/KIT/MAPK3/LGMN/SLC12A2/CCL25/CCL24/JAM3/ZNF580/TIRAP/LGALS9/GBF1/CXCR3/GPSM3/PTK2B/IL6R/CREB3/ADAM17/CXCL12/PDGFB/IL17RC/OXSR1/CSF1R/HSD3B7/RAC2/WNK1/SYK/SWAP70/CCL2/ADAM10/PREX1/CXCL3/AKIRIN1/SRP54/CALR/FCER1G/C3AR1/S…
GOBP_POSITIVE_REGULATION_OF_CHROMATIN_ORGANIZATION	GOBP_POSITIVE_REGULATION_OF_CHROMATIN_ORGANIZATION	96	0.390222	1.4296	0.00179479	0.0775263	0.0665909	9809	tags=71%, list=53%, signal=34%	NOS1/BRCA1/MYB/MUC1/BRD7/MAPK3/TADA2A/PHF19/ZNF304/WDR61/ARRB1/ZBTB7B/AUTS2/PRKD2/RIF1/SMARCB1/WBP2/KAT2A/NIPBL/OGT/TPR/ING2/RUVBL2/PAF1/PPHLN1/KMT2E/TADA2B/JARID2/RPS6KA4/SART3/RNF40/TRIM28/MTF2/RPS6KA5/PRKD1/KAT7/MIER1/CHTOP/DNMT3B/WDR5/DNMT1/ATM/NELFE/NAP1L2/JDP2/SETDB2/SMAD4/BCL6/MPHOSPH8/BRD4/AKAP8L/CTR9/SNW1/VEGFA/PAXIP1/SIN3A/RNF20/TET1/SPHK2/PHF1/KMT2A/ATF7IP/PPARGC1A/ISL1/MECP2/LRRK2/PIH…
GOBP_NEGATIVE_REGULATION_OF_RESPONSE_TO_FOOD	GOBP_NEGATIVE_REGULATION_OF_RESPONSE_TO_FOOD	11	0.683931	1.80472	0.00183025	0.0775263	0.0665909	2401	tags=36%, list=13%, signal=32%	CARTPT/SPX/BBS2/PPARA
GOBP_CHROMATIN_REMODELING	GOBP_CHROMATIN_REMODELING	172	0.346757	1.32163	0.00183161	0.0775263	0.0665909	9191	tags=59%, list=49%, signal=30%	KDM4E/PADI4/CDKN2A/MYB/PAK1/TADA2A/TAF6L/CENPC/KDM5A/SMARCD3/ESR1/ZNF304/SATB1/HCFC1/CENPM/SMARCC2/KDM5B/KDM4A/CHD3/MIS18A/CHD8/SIRT2/INO80C/KDM5D/HCFC2/SMARCB1/HDAC4/INO80/HDAC5/PSME4/MBD3/KAT2A/CENPS/VPS72/TPR/RUVBL2/SMARCD2/SMARCA1/PPHLN1/CENPA/GATAD2B/SMARCC1/TADA2B/SRCAP/BPTF/CENPW/KAT2B/DMAP1/JARID2/RBBP7/HDAC2/CENPU/BAZ2B/CENPI/DR1/ITGB3BP/ZNFX1/PHF8/NPM1/SOX9/HDAC1/TRIM28/NRDE2/RB1/DNMT1/…
GOMF_ACETYLTRANSFERASE_ACTIVITY	GOMF_ACETYLTRANSFERASE_ACTIVITY	89	0.397468	1.44547	0.00183161	0.0775263	0.0665909	6371	tags=52%, list=34%, signal=34%	NAT8/AANAT/NAA11/MOGAT2/LCAT/NAT8L/CRAT/SPHK1/LPCAT4/TADA2A/KAT5/MCM3AP/KAT6A/TADA3/NCOA3/ELP3/TAF1/NAT9/NAA10/NAA16/ACAT1/KAT2A/BRPF1/HAT1/BRD1/PAFAH1B2/PAFAH1B3/EP300/NCOA1/GTF3C4/SRCAP/KAT2B/NAT10/GNPNAT1/HGSNAT/DBT/GCAT/GNPAT/CREBBP/NAA60/NAA50/MEAF6/KAT7/FASN/EPC1/CASD1
GOBP_POSITIVE_REGULATION_OF_NERVOUS_SYSTEM_DEVELOPMENT	GOBP_POSITIVE_REGULATION_OF_NERVOUS_SYSTEM_DEVELOPMENT	253	0.332188	1.28589	0.00185002	0.0775263	0.0665909	8653	tags=54%, list=46%, signal=29%	AMIGO3/LRTM2/HAP1/RASSF10/ITPKA/GRID2/LTA/ADGRB3/FLRT3/DRD2/DCT/ASCL1/CHODL/IL6/NTN1/LRRN3/DLG5/PLXNA3/MYB/TNF/ISLR2/SHH/IL1RAPL1/PAK1/KIT/PLAG1/LRP8/PARP6/TIAM1/FZD3/BHLHB9/EPHA4/IST1/SMARCD3/NLGN2/SERPINE2/TLR2/CXCL12/RGS14/LRP2/SEMA4D/TRPV2/CDH4/PLXND1/GDI1/SPINT1/SRRT/ADGRL2/PRPF19/WNT3/ZNF365/NUMB/SS18L1/EGR2/MAP1B/MAPT/DICER1/MME/CUX1/ADGRB1/EEF2K/CUX2/SERPINF1/LPAR3/PPP1CC/FAIM/ZNF335/SYND…
GOBP_VACUOLAR_TRANSPORT	GOBP_VACUOLAR_TRANSPORT	148	0.358504	1.35423	0.00185002	0.0775263	0.0665909	9074	tags=59%, list=49%, signal=31%	CACNG8/PCDHGA3/HOOK2/VPS18/BECN1/GOSR2/RILP/ADRB2/CLEC16A/RBSN/MTM1/AKTIP/RHOB/SLC46A3/AP1G2/VIPAS39/CHMP7/VPS39/MON1A/AP3D1/MON1B/UBXN6/SMURF1/ZFYVE16/VPS13C/VPS52/VPS33A/VPS11/SNX27/CHMP5/DENND3/LEPROTL1/VPS4A/CHMP3/CCDC91/NEDD4/GCC2/HSPA1A/AP3M1/TSG101/VPS37B/LAMP2/AP4M1/VCP/RAB12/HGSNAT/SPTBN5/CHMP1B/NCOA4/VTI1B/EHD3/NAGPA/AP3B1/VPS13D/MGRN1/VPS37C/VPS37A/M6PR/LAPTM5/SORT1/PRKN/HGS/SNX16/BIN1…
GOBP_POSITIVE_REGULATION_OF_AMINE_TRANSPORT	GOBP_POSITIVE_REGULATION_OF_AMINE_TRANSPORT	32	0.491162	1.60567	0.00187436	0.0780554	0.0670454	4031	tags=38%, list=22%, signal=29%	NPY2R/VIP/CHRNB2/SLC38A3/CARTPT/DRD4/DRD2/ADORA2A/SLC12A2/CXCL12/PSEN1/GRK2
GOBP_WATER_SOLUBLE_VITAMIN_METABOLIC_PROCESS	GOBP_WATER_SOLUBLE_VITAMIN_METABOLIC_PROCESS	79	0.3977	1.43291	0.0019814	0.0820004	0.0704339	8547	tags=61%, list=46%, signal=33%	PRSS3/CTRB1/CTRC/AMN/PC/MTHFS/TCN2/ACP5/THTPA/VNN2/SLC2A3/ALDH1L1/MCCC2/PANK2/MCCC1/SLC5A6/MTHFR/SLC23A2/PCCB/SLC19A1/MTR/SLC25A19/SHMT2/ABCC1/SLC52A3/PDZD11/AOX1/CYB5R3/DHFR/BTD/ALDH1L2/PDXK/SLC23A1/TPK1/SLC52A2/MTHFD1L/RFK/SLC25A32/VNN1/MMAA/MMADHC/FOLR2/TKTL1/HLCS/MTRR/CUBN/PNPO/ABCD4
GOBP_POSITIVE_REGULATION_OF_LEUKOCYTE_CHEMOTAXIS	GOBP_POSITIVE_REGULATION_OF_LEUKOCYTE_CHEMOTAXIS	91	0.398055	1.45179	0.00201642	0.0829345	0.0712362	7904	tags=56%, list=42%, signal=32%	S100A14/S100A7/DEFB124/IL6/IL23A/CCR2/EDN2/RIPOR2/MAPK3/LGMN/ZNF580/TIRAP/LGALS9/GPSM3/PTK2B/IL6R/CREB3/ADAM17/CXCL12/OXSR1/CSF1R/RAC2/WNK1/SWAP70/ADAM10/AKIRIN1/CALR/C3AR1/RAC1/CCL21/CXCL13/MCU/LBP/VEGFC/CD74/CCL4/DNM1L/MOSPD2/STK39/C5AR1/CXCL10/SERPINE1/CCL19/CSF1/F2RL1/CXCL14/PGF/VEGFD/XCL2/VEGFA/VEGFB
GOMF_DEACETYLASE_ACTIVITY	GOMF_DEACETYLASE_ACTIVITY	36	0.48552	1.61024	0.00204088	0.0834258	0.0716582	8071	tags=72%, list=43%, signal=41%	NDST3/CES1/HDAC10/AMDHD2/HDAC11/PIGL/SIRT7/HDAC3/SIRT2/YDJC/HDAC4/HDAC5/CES2/NDST1/HDAC2/SUDS3/HDAC8/HDAC1/MIER1/HDAC9/MACROD2/ESD/SIRT3/HDAC6/SIRT5/MTA2
GOBP_RIBOSOME_BIOGENESIS	GOBP_RIBOSOME_BIOGENESIS	295	0.322208	1.25425	0.00209041	0.0844146	0.0725076	10892	tags=66%, list=58%, signal=28%	DDX47/GNL3L/HEATR3/HELB/RNASEL/DDX31/ZNF658/TSC1/RPL3L/TRMT61B/URB1/EXOSC6/SIRT7/DHX30/FBLL1/TBL3/DHX37/DDX52/LSG1/SART1/GTPBP4/PIH1D2/MRM1/NOP9/NLE1/IMP4/MTERF4/PES1/RPP30/RPL26L1/EBNA1BP2/RIOK2/NOM1/MRPS7/DDX18/BYSL/RPUSD3/RAN/MRM2/RPS10/MPV17L2/POP4/EFL1/PWP1/METTL5/NOL11/DDX3X/TFB1M/ZCCHC4/KRR1/NGDN/ERCC2/ABT1/TEX10/MRM3/ISG20/TRAF7/KAT2B/EIF6/TSR3/TFB2M/SBDS/ERI2/NAT10/RCL1/YBEY/UTP11/RPL7L1…
GOCC_CHROMOSOME_CENTROMERIC_REGION	GOCC_CHROMOSOME_CENTROMERIC_REGION	190	0.337474	1.29235	0.00209041	0.0844146	0.0725076	9067	tags=59%, list=49%, signal=31%	TEX14/PLK1/CDT1/CDCA5/REC8/CENPC/KMT5C/DCTN1/LRWD1/DYNC1I1/CFDP1/CENPM/MIS18A/DYNLT3/SUGT1/NUP133/ZWINT/CLASP2/PSEN1/NEK2/PPP2CB/STAG1/SS18L1/CENPS/TPR/SPAG5/UVRAG/CENPA/SPC25/NCAPD2/NGDN/AURKB/PPP1CC/CENPW/SMC3/ORC2/SMC5/TP53BP1/KAT2B/PPP1R12A/DSN1/IKZF1/CENPU/CENPF/SKA2/KIF22/CENPI/ITGB3BP/CDCA8/SGO1/NUP37/DYNC1LI2/MAD1L1/SEH1L/PDS5A/RASSF2/UHRF2/MEAF6/KAT7/RCC2/SYCP2L/DCTN5/CBX1/CBX3/NDE1/TTK/…
GOBP_NEUROTRANSMITTER_METABOLIC_PROCESS	GOBP_NEUROTRANSMITTER_METABOLIC_PROCESS	27	0.515271	1.63263	0.00217967	0.0872273	0.0749236	2994	tags=44%, list=16%, signal=37%	SLC5A7/TH/NOS1/DBH/GCHFR/ACHE/PRIMA1/HNMT/DAGLB/ABAT/ALDH5A1/COLQ
GOBP_MUSCLE_FILAMENT_SLIDING	GOBP_MUSCLE_FILAMENT_SLIDING	38	0.475943	1.5918	0.00218625	0.0872273	0.0749236	1465	tags=32%, list=8%, signal=29%	MYH8/MYH7/TNNT1/MYH6/MYBPC2/MYLK2/MYL2/ACTA1/TNNC2/TNNI1/MYH2/TTN
GOBP_REGULATION_OF_AUTOPHAGY	GOBP_REGULATION_OF_AUTOPHAGY	321	0.318996	1.24573	0.0022754	0.0901464	0.0774309	9098	tags=55%, list=49%, signal=29%	PRKAG3/NOD2/SNCA/ACER2/TRIM34/TRIM6/IRGM/BECN1/MTMR3/ATG101/ADRB2/ZKSCAN3/SLC38A9/MAPK3/CLEC16A/PRKAB2/GPSM1/EEF1A2/RRAGB/MTM1/ULK1/UBQLN4/PRKAB1/KAT5/CAPN1/TP53INP2/TSC1/TRIM22/TRIM21/DHRSX/TBC1D25/EXOC4/TSC2/SREBF2/KDM4A/SESN1/CDK5/SIRT2/MID2/FOXK1/SNX5/PRKAA2/PHF23/RALB/VPS13C/QSOX1/ATP6V1D/MFSD8/TAB3/PLK3/WDR6/USP30/ATP6V0E2/ATP6V0A1/ATP6V1A/NEDD4/FBXO7/ATP6V1H/ERN1/RNF41/RNF5/MAPT/PAFAH1B2/G…
GOBP_RESPONSE_TO_AMYLOID_BETA	GOBP_RESPONSE_TO_AMYLOID_BETA	43	0.456732	1.55137	0.00228682	0.0901464	0.0774309	8244	tags=65%, list=44%, signal=36%	MMP13/CHRNA7/MMP12/CACNB1/ADRB2/LGMN/EPHA4/AGER/CD36/CDK5/PSEN1/FYN/TREM2/FCGR2B/ABCC1/CASP4/VCAM1/MMP2/GJA1/IGF1R/IGF1/CACNA1B/BACE1/APP/TLR4/ATP1A3/ICAM1/TLR6
GOBP_INTERLEUKIN_6_MEDIATED_SIGNALING_PATHWAY	GOBP_INTERLEUKIN_6_MEDIATED_SIGNALING_PATHWAY	22	0.545386	1.66604	0.00231232	0.0901464	0.0774309	7519	tags=73%, list=40%, signal=43%	IL6/C1QTNF4/IL6R/FER/YAP1/PTPN11/IL6ST/STAT1/JAK2/SPI1/ST18/JAK1/SRC/SMAD4/CBL/CTR9
GOMF_CATECHOLAMINE_BINDING	GOMF_CATECHOLAMINE_BINDING	13	0.638436	1.75618	0.00232736	0.0901464	0.0774309	1610	tags=54%, list=9%, signal=49%	ADRB3/TH/DRD4/DRD1/DRD2/ADRA2B/ADRB2
GOBP_POSITIVE_REGULATION_OF_LEUKOCYTE_CELL_CELL_ADHESION	GOBP_POSITIVE_REGULATION_OF_LEUKOCYTE_CELL_CELL_ADHESION	226	0.333448	1.28444	0.00234939	0.0901464	0.0774309	9976	tags=62%, list=54%, signal=29%	IL1A/IL1RL2/TNFRSF13C/NOD2/CLECL1/IL6/IL23A/CCR2/PRKCQ/SIRPB1/NLRP3/MYB/TFRC/TNF/DPP4/SHH/PAK1/ZAP70/ICOS/CD274/LILRB1/HHLA2/GPAM/PRKCZ/CTLA4/RHOH/EPO/ADA/VSIR/PNP/STAT5B/LGALS9/IL4R/RASAL3/RARA/CCDC88B/AGER/ZBTB7B/AP3D1/SART1/CD5/TNFRSF14/FYN/CD4/NKAP/SYK/IRAK1/CD46/CD70/CCL2/RUNX1/PYCARD/HLA-A/NFKBIZ/IGFBP2/RAC1/CCL21/MALT1/CD1D/GRB2/LCK/PTPN11/IL6ST/SELENOK/CD74/ST3GAL4/SOX12/HLA-E/NCK2/PTPN6/…
GOBP_AMYLOID_PRECURSOR_PROTEIN_METABOLIC_PROCESS	GOBP_AMYLOID_PRECURSOR_PROTEIN_METABOLIC_PROCESS	69	0.410194	1.46282	0.00238639	0.0901464	0.0774309	8837	tags=61%, list=47%, signal=32%	HAP1/CHRNA7/ABCA7/ACHE/TNF/PIN1/EPHA4/LDLRAP1/RTN2/SPON1/AGER/BACE2/NCSTN/ADAM17/TMED10/NECAB3/PSEN1/ITM2B/ADAM10/APH1A/RTN3/DYRK1A/RTN1/DLG1/PAWR/SP1/LYN/RELA/IFNGR1/ITM2A/APOE/BIN1/IGF1/CLU/GGA3/BACE1/TMCC2/AATF/NECAB1/ITM2C/IFNG/ROCK2
GOBP_ENGULFMENT_OF_APOPTOTIC_CELL	GOBP_ENGULFMENT_OF_APOPTOTIC_CELL	19	0.555684	1.64876	0.0023875	0.0901464	0.0774309	4545	tags=63%, list=24%, signal=48%	XKR5/ABCA7/XKR9/BECN1/RHOH/RHOBTB1/XKR6/RAC2/ADGRB1/MEGF10/TREM2/RAC1
GOCC_PRP19_COMPLEX	GOCC_PRP19_COMPLEX	13	0.636421	1.75064	0.00240831	0.0901464	0.0774309	3898	tags=46%, list=21%, signal=37%	POLR2A/SYF2/RBM22/PRPF19/CTNNBL1/ISY1
GOBP_PEPTIDYL_LYSINE_ACETYLATION	GOBP_PEPTIDYL_LYSINE_ACETYLATION	164	0.350727	1.33404	0.00242339	0.0901464	0.0774309	9368	tags=61%, list=50%, signal=31%	NOS1/NAT8/SNCA/BRCA1/MUC1/BRD7/MAPK3/TADA2A/TAF6L/KAT5/MCM3AP/KAT6A/THAP7/HCFC1/TADA3/KANSL1L/NCOA3/LDB1/APBB1/IWS1/ARRB1/TAF1/PRKAA2/AUTS2/MRGBP/SMARCB1/WBP2/SETD5/SUPT3H/MBD3/KAT2A/BRPF1/HAT1/KANSL2/TADA1/PYGO2/BRD1/OGT/RUVBL2/MORF4L1/TAF5L/EP300/TADA2B/NCOA1/YEATS4/GTF3C4/SRCAP/SMC5/KAT2B/DMAP1/RPS6KA4/PARK7/HDAC2/ING5/DR1/CHEK1/CREBBP/NAA60/SPI1/MBIP/DIP2A/RPS6KA5/TAF5/NAA50/MEAF6/KAT7/WDR5/P…
GOBP_PROTEASOMAL_PROTEIN_CATABOLIC_PROCESS	GOBP_PROTEASOMAL_PROTEIN_CATABOLIC_PROCESS	471	0.307005	1.21427	0.00242339	0.0901464	0.0774309	9520	tags=55%, list=51%, signal=28%	TRIM71/FBXO39/NCCRP1/KCNE2/RNF175/AQP11/USP44/GET4/SHH/KLHL20/TRIB2/FOXF2/CDC20B/PLK1/ERLIN2/HACE1/UBXN11/HFE/UBE2S/ARAF/MAP1A/ANKZF1/MTM1/UGGT2/UBQLN4/ALAD/PKD1/PSMB10/RHBDF1/PSMC1/KAT5/AMN1/RNF216/GNA12/HUWE1/FBXL20/FBXW5/BBS7/KLHL15/ARRB1/KLHL42/SIRT2/HECW2/TAF1/UBXN6/SMURF1/DCAF11/TMTC3/KCTD10/ANAPC1/CDC26/TRIM39/PSEN1/TMUB1/UGGT1/RNF126/DDB1/DNAJB2/FBXL12/HECTD1/PSMA6/FAF1/PRPF19/MAEA/PPP2CB…
GOBP_PROTEIN_ACETYLATION	GOBP_PROTEIN_ACETYLATION	192	0.34238	1.31153	0.00242339	0.0901464	0.0774309	9033	tags=59%, list=48%, signal=31%	NOS1/NAT8/AANAT/NAA11/SNCA/CAMK1/BRCA1/MUC1/SPHK1/BRD7/MAPK3/TADA2A/TAF6L/KAT5/MCM3AP/KAT6A/THAP7/HCFC1/TADA3/KANSL1L/NCOA3/LDB1/APBB1/FAM161A/IWS1/ARRB1/TAF1/PRKAA2/AUTS2/NAT9/NAA10/NAA16/MRGBP/SMARCB1/WBP2/SETD5/SUPT3H/MBD3/KAT2A/BRPF1/HAT1/KANSL2/TADA1/PYGO2/BRD1/OGT/RUVBL2/MAPT/MORF4L1/TAF5L/EP300/TADA2B/DDX3X/NCOA1/YEATS4/GTF3C4/SRCAP/SMC5/TERF2IP/KAT2B/DMAP1/NAT10/RPS6KA4/PARK7/HDAC2/ING5/D…
GOBP_RECEPTOR_CATABOLIC_PROCESS	GOBP_RECEPTOR_CATABOLIC_PROCESS	36	0.481616	1.59729	0.00245279	0.0901464	0.0774309	6660	tags=56%, list=36%, signal=36%	BECN1/LGMN/CAPN1/AP2A2/CDK5/SMURF1/MTMR2/AP2B1/CLTC/AP2M1/NEDD4/VLDLR/ANXA2/UVRAG/AP2S1/PTPN1/SH3GLB1/LAPTM5/APOE/RNF43
GOCC_CLATHRIN_ADAPTOR_COMPLEX	GOCC_CLATHRIN_ADAPTOR_COMPLEX	23	0.53949	1.66146	0.00246012	0.0901464	0.0774309	5927	tags=74%, list=32%, signal=50%	SYNRG/AP1G2/AP4B1/AP1M1/AP2A2/AP1S1/AP3M2/AP1B1/AP2B1/AP2M1/SGIP1/AP3M1/AP2S1/AP4M1/AP1M2/AP3B1/TBC1D5
GOBP_MRNA_PROCESSING	GOBP_MRNA_PROCESSING	492	0.305989	1.21236	0.00246039	0.0901464	0.0774309	9556	tags=54%, list=51%, signal=27%	APOBEC2/RBFOX1/CPSF4L/RBM20/ERN2/ELAVL4/SMN2/DDX47/AFF2/NOL3/RBFOX3/DHX38/CPEB1/CELF4/GPKOW/NOVA2/TFIP11/RBM5/RNASEL/RBM6/ZNF473/CDK11A/ZFP36L1/CPEB3/SREK1/TSEN54/FXR2/CSTF1/SREK1IP1/SRRM2/TSEN34/RBM26/REST/IWS1/PPIL1/CMTR1/RAVER2/SYMPK/SART1/GTF2H3/CPSF4/POLR2A/RBM28/PRPF4/ZC3H13/SYF2/RBM23/CCNT1/THOC1/PRPF6/AURKAIP1/GTF2F1/CWF19L1/SNRNP35/RBM22/SF3A3/PRPF3/SRRT/CD2BP2/THRAP3/DCPS/PRPF19/SRSF5/G…
GOBP_NEGATIVE_REGULATION_OF_FATTY_ACID_BIOSYNTHETIC_PROCESS	GOBP_NEGATIVE_REGULATION_OF_FATTY_ACID_BIOSYNTHETIC_PROCESS	14	0.614824	1.72065	0.00246235	0.0901464	0.0774309	4255	tags=64%, list=23%, signal=50%	CYP7A1/BRCA1/INSIG1/ERLIN2/ACADL/ACADVL/WDTC1/PIBF1/CEACAM1
GOBP_REGULATION_OF_NEUTROPHIL_CHEMOTAXIS	GOBP_REGULATION_OF_NEUTROPHIL_CHEMOTAXIS	31	0.492941	1.60576	0.00249529	0.0904352	0.0776789	6352	tags=61%, list=34%, signal=40%	NOD2/C5AR2/IL23A/DPP4/MPP1/RIPOR2/JAM3/TIRAP/RAC2/C3AR1/RAC1/CCL21/MCU/LBP/CD74/DNM1L/MOSPD2/C5AR1/CCL19
GOMF_DNA_BINDING_TRANSCRIPTION_FACTOR_BINDING	GOMF_DNA_BINDING_TRANSCRIPTION_FACTOR_BINDING	365	0.312107	1.2245	0.00249738	0.0904352	0.0776789	10361	tags=62%, list=56%, signal=28%	TCF23/NR0B2/PRDM16/BEX1/ASCL1/TLE6/CDKN2A/BBS2/PADI2/CNOT1/BBS1/CRTC1/PRDM5/BCAS3/TCF21/TRERF1/FOXH1/ATOH8/KAT5/STAT5B/SMARCD3/ESR1/RERG/PPARA/HCFC1/TADA3/ID2/NCOA3/MED25/LDB1/HDAC3/BBS7/RBL1/ARRB1/RXRA/ATN1/MMS19/TAF1/MEF2D/KDM5D/PARP9/IKZF4/FHL2/PRPF6/NOTCH2/JUND/SMARCB1/PSMA6/HDAC4/FAF1/WBP2/FBP1/THRAP3/HDAC5/NFYB/ASXL1/NR1H2/GMNN/IFI27/YAP1/ARNT/GABARAPL1/TAF11/TEAD3/ZMYND8/EGR2/TACC1/GAS2L1/…
GOCC_MEMBRANE_COAT	GOCC_MEMBRANE_COAT	90	0.388878	1.41701	0.00253438	0.0912788	0.0784036	9451	tags=66%, list=51%, signal=32%	ENTHD1/VPS18/SYNRG/AP1G2/AP4B1/SEC23B/AP1M1/AP2A2/AP1S1/VPS39/AP3M2/AP1B1/EPN1/AP3D1/COPZ2/CLTB/VPS33A/AP2B1/CLTC/AP3S2/AP2M1/ARL6/PEF1/AP4E1/SEC24B/SGIP1/AP3M1/AP2S1/AP4M1/ARCN1/SYNJ1/CHMP1B/AP1M2/PDCD6/COPZ1/COPB2/AP3B1/SEC23A/COPG1/TBC1D5/SEC24D/NCALD/AP3B2/AP3S1/TEPSIN/SAR1A/COPB1/BTBD8/AP5S1/SCYL1/SEC24A/EPS15L1/SEC31A/CHMP4A/AFTPH/COPE/SAR1B/AP2A1/AP5M1
GOBP_ATP_METABOLIC_PROCESS	GOBP_ATP_METABOLIC_PROCESS	282	0.324238	1.26018	0.00257138	0.0914717	0.0785692	9129	tags=56%, list=49%, signal=29%	PKLR/MYH8/PRKAG3/MYH7/COX6A2/GPD1/LDHC/MYH6/SNCA/ZBTB20/ALDOC/GALK1/POM121/AK1/HK1/NMNAT1/NUP210/TAZ/COQ9/FAM20C/PPARA/DDIT4/PGAM1/FIGNL1/PID1/NDUFS6/NDUFS8/FOXK1/PRKAA2/SLC25A12/FIS1/NUP133/UQCC3/PSEN1/NUP62/HDAC4/FBP1/ARNT/PPIF/NDUFA10/NDUFA11/ATP6V1A/MSH2/OGT/UQCRQ/TPR/COX7A1/NDUFC1/JMJD8/AFG1L/HSPA1A/ATP1B1/ATP6V0C/EP300/P2RX7/TREM2/NDUFA6/NDUFS3/NDUFB7/SHMT2/COX7C/NUP50/EIF6/COX6B1/GHITM/NDU…
GOBP_REGULATION_OF_ANATOMICAL_STRUCTURE_SIZE	GOBP_REGULATION_OF_ANATOMICAL_STRUCTURE_SIZE	473	0.30636	1.21183	0.00257138	0.0914717	0.0785692	8926	tags=52%, list=48%, signal=28%	HTR1B/ADRB3/SCTR/NOS1/DBH/ARHGAP40/DRAXIN/SMTNL2/DRD1/HTR7/SMTNL1/MAGEL2/FOXC2/NTN1/TMSB15B/ADRA2B/EDN2/P2RX1/TRPV4/CCL26/KCNA5/AQP11/PLXNA3/WNT9B/BBS2/SPIRE2/ISLR2/PLEKHH2/BDKRB2/NPR1/SNTA1/NPPA/PAK1/RILP/SLC12A9/ADRB2/CARMIL1/PFN4/SEMA4F/ADORA2A/BAIAP2/SCPEP1/SLC12A2/PLS1/CCL24/ADD3/EPHA7/IST1/JMY/SEMA3B/SEMA3F/E2F4/TSC1/SLC12A7/PER2/CDK4/SLC12A4/GMFG/CDC42EP1/NOS3/WDTC1/TRIOBP/SEMA4B/SSH3/PTK2…
GOBP_POSITIVE_REGULATION_OF_EXCITATORY_POSTSYNAPTIC_POTENTIAL	GOBP_POSITIVE_REGULATION_OF_EXCITATORY_POSTSYNAPTIC_POTENTIAL	27	0.511384	1.62031	0.00259664	0.0914717	0.0785692	4741	tags=52%, list=25%, signal=39%	IGSF11/CHRNA7/SHANK1/STX1B/GRIN1/DLG4/ADRB2/PRKCZ/NLGN2/PTK2B/SHANK2/SSH1/CUX2/NRXN1
GOBP_NEGATIVE_REGULATION_OF_KINASE_ACTIVITY	GOBP_NEGATIVE_REGULATION_OF_KINASE_ACTIVITY	245	0.327955	1.26797	0.00260838	0.0914717	0.0785692	10969	tags=67%, list=59%, signal=28%	SERPINB3/WEE2/SNCA/SPRED3/CDKN2A/PRKAR1B/DUSP1/NPPA/TRIB2/PLK1/EPHA1/PIK3IP1/ADORA2A/AJUBA/BMP7/RHOH/TESC/TARBP2/CEP85/SH2B3/CIT/CDKN2D/CAMK2N1/GMFG/LRP6/TSC2/DUSP18/HEXIM1/DUSP16/RGS14/DUSP14/MAPK8IP1/IRAK3/DUSP3/SPRY1/PSEN1/NUP62/HEG1/GPS1/TESK1/TAOK3/NF2/WNK1/GPRC5A/FBXO7/MEN1/CHP1/SMPD1/PPP1R1B/MAPT/SOCS4/CBLB/SRCIN1/ITGB1BP1/PYCARD/TRIM27/CEACAM1/DUSP19/GMFB/TSG101/KAT2B/PTPN1/PARK7/YWHAB/YW…
GOCC_EARLY_ENDOSOME	GOCC_EARLY_ENDOSOME	364	0.312647	1.22685	0.00260838	0.0914717	0.0785692	8561	tags=52%, list=46%, signal=29%	APOA5/SLC30A10/HAP1/SH3GL3/GRIA1/ST8SIA2/MAGEL2/ABCA7/CD207/TMEM108/APOB/SORCS2/KREMEN2/OR51E2/ANK2/TFRC/WDFY2/SPHK1/VPS18/CD274/ERBB2/MIB2/ADRB2/CFTR/INPP5B/VAC14/NEURL1B/RAB5C/MAPK3/MCOLN3/HFE/RBSN/CLCN5/FGD2/MVB12B/EPHA4/SNX8/RHOB/TLR3/LDLRAP1/VIPAS39/WDR91/NUCB1/UHRF1BP1L/RAB11FIP5/STEAP2/FKBP15/ARC/CCDC93/LRP6/HLA-C/NIPA2/RAB32/LNPEP/SNX12/NCSTN/APOC2/UBXN6/SNX5/RUFY1/ZFYVE16/MTMR2/VPS33A/VP…
GOBP_FC_EPSILON_RECEPTOR_SIGNALING_PATHWAY	GOBP_FC_EPSILON_RECEPTOR_SIGNALING_PATHWAY	111	0.376657	1.39192	0.00264537	0.0917296	0.0787908	9061	tags=61%, list=49%, signal=32%	LAT/PRKCQ/FCER1A/PAK1/MAPK10/MAPK3/BTK/NFATC3/PSMB10/PSMC1/MAP2K7/VAV2/FER/PLCG2/SHC1/GAB2/PSMA6/PSME4/PSME2/TAB3/SYK/PSMB3/PPP3CB/TAB1/PSME3/SKP1/SOS1/PSMC6/FCER1G/RAC1/MAP2K4/MALT1/GRB2/NFATC2/PSMC4/PSMB8/PSMD13/PSMC2/PSMD11/PSMD3/PSMB7/PSMA2/PSMB1/PSMB2/LYN/RELA/CALM1/PIK3CA/PSMB9/CUL1/PAK2/PSMD5/PSMC5/PSMD1/ITK/PSMC3/FBXW11/PSMB6/NFKB1/PSMA7/IKBKB/PIK3R2/IKBKG/PPP3R1/FOS/CARD11/PSMD14/PIK3CB
GOBP_SPINDLE_ORGANIZATION	GOBP_SPINDLE_ORGANIZATION	175	0.34112	1.30156	0.00264537	0.0917296	0.0787908	10873	tags=66%, list=58%, signal=28%	TUBB1/FSD1/CENPJ/PLK1/TUBGCP2/CEP72/PKD1/ARHGEF10/DCTN1/CEP192/HDAC3/CEP126/CHD3/GPSM2/MLH1/LZTS2/RGS14/DYNC1H1/CLASP2/AURKC/NEK2/TACC3/NUMA1/NUP62/CHMP5/CLTC/INO80/STAG1/RAN/TPR/TACC1/PRC1/SPAG5/HSPA1A/UVRAG/SPC25/PIBF1/AURKA/CCNB2/AURKB/SMC3/SBDS/GOLGA2/MYH9/MAP4/VCP/NEK7/HAUS4/CHMP1B/STMN1/KPNB1/DLG1/RPS3/TPPP/MAP9/TUBGCP5/KIFC1/TUBGCP4/EFHC2/TOGARAM2/CEP120/TOGARAM1/WRAP73/TRIM36/CCSAP/WASHC5…
GOBP_PATTERN_RECOGNITION_RECEPTOR_SIGNALING_PATHWAY	GOBP_PATTERN_RECOGNITION_RECEPTOR_SIGNALING_PATHWAY	197	0.340201	1.30401	0.00268237	0.0917296	0.0787908	9804	tags=58%, list=53%, signal=28%	BPIFB1/NLRP2B/S100A14/SFTPD/NOD2/S100A9/TLR10/SFTPA1/APOB/SLC15A2/DHX58/TLR7/IRGM/NMI/BTK/IFI35/LGMN/IRF3/TLR3/UBE2V1/NLRX1/ESR1/TIRAP/GPATCH3/TLR5/ALPK1/RAB11FIP2/UNC93B1/CD36/TLR2/CD14/ERBIN/IRAK3/SMPDL3B/TAB3/LRRC19/IRAK1/TAB1/HSPA1A/DDX3X/IRF1/CACTIN/LY96/IRF7/LBP/UBA52/IRAK2/UBE2D1/RIOK3/MAPKAPK2/AP3B1/PUM2/OTUD4/FFAR2/LGR4/ANKRD17/CTSL/CASP8/HSP90B1/MFHAS1/LYN/PJA2/RELA/PIK3AP1/UBE2D3/GRAMD…
GOBP_RNA_PHOSPHODIESTER_BOND_HYDROLYSIS_ENDONUCLEOLYTIC	GOBP_RNA_PHOSPHODIESTER_BOND_HYDROLYSIS_ENDONUCLEOLYTIC	75	0.406329	1.45907	0.00268237	0.0917296	0.0787908	9071	tags=72%, list=49%, signal=37%	ERN2/SLFN13/ZC3H12B/SMG6/RNASEK/ZC3H12C/ZC3H12D/RNASEL/RNASEH2A/NYNRIN/RNASEH1/TSEN34/TBL3/NOP9/AGO1/RPP30/ENDOU/RPP21/CPSF3/POP4/ENDOV/ERN1/DICER1/RIDA/SND1/ABT1/DBR1/TSNAX/AGO3/RCL1/YBEY/EDC3/APEX1/ELAC2/RNASE1/NUDT16L1/TSN/TSEN2/NOP14/FEN1/PIWIL1/POP1/MRPL44/RRS1/RNASET2/RPP38/UTP20/ZC3H12A/RPP40/NOB1/NUDT16/KHNYN/LACTB2/UTP23
GOMF_CARGO_ADAPTOR_ACTIVITY	GOMF_CARGO_ADAPTOR_ACTIVITY	17	0.59541	1.72902	0.00268457	0.0917296	0.0787908	5123	tags=71%, list=27%, signal=51%	STON2/LDLRAP1/AP1G2/AP1M1/AP2A2/ARRB1/AP2B1/AP2M1/AP4E1/HIP1R/AP2S1/AP1M2
GOBP_CHOLESTEROL_STORAGE	GOBP_CHOLESTEROL_STORAGE	18	0.556295	1.6324	0.00270373	0.091913	0.0789483	6904	tags=78%, list=37%, signal=49%	APOB/LPL/CES1/ABCA1/PPARA/SREBF2/CD36/STARD4/NR1H2/EHD1/PPARD/SCARB1/MSR1/TTC39B
GOBP_MUSCLE_CELL_DIFFERENTIATION	GOBP_MUSCLE_CELL_DIFFERENTIATION	320	0.318725	1.24449	0.00271937	0.0919529	0.0789826	7907	tags=49%, list=42%, signal=29%	NRAP/SYNPO2L/TCF23/NOS1/CEACAM5/TBX18/TNNT1/MYH6/LBX2/NRG1/MYL2/KLHL41/ACTA1/WFIKKN2/ADGRB3/FGF9/CASQ1/SCGB3A1/OBSCN/CDH15/CAMK1/PI16/SPEG/ANK2/PLPP7/SHH/TBX1/MSX1/ZBED6/LDB3/TTN/CYP26B1/PAK1/RIPOR2/KIT/NFATC4/PIN1/NFATC3/DMPK/ACVR1/TARBP2/FLNC/WT1/TANC1/SGCB/MAMSTR/SMARCD3/TSC1/PPARA/CSRP2/IL4R/PARP2/ID2/CDH2/FLII/SYNE1/ENG/PDGFB/AKAP13/AFG3L2/FHL2/SDC1/CTNNA1/HDAC4/HDAC5/NEBL/BCL9/KAT2A/CFL2/LM…
GOBP_REGULATION_OF_PEPTIDYL_SERINE_PHOSPHORYLATION_OF_STAT_PROTEIN	GOBP_REGULATION_OF_PEPTIDYL_SERINE_PHOSPHORYLATION_OF_STAT_PROTEIN	14	-0.480734	-1.98225	0.00275586	0.0919529	0.0789826	1251	tags=50%, list=7%, signal=47%	IFNA6/IFNA4/IFNA1/IFNA5/IFNA13/IFNA16/IFNA7
GOBP_IMPORT_INTO_NUCLEUS	GOBP_IMPORT_INTO_NUCLEUS	159	0.34433	1.30635	0.00275637	0.0919529	0.0789826	9496	tags=60%, list=51%, signal=30%	CHP2/RGPD1/SMN2/RGPD3/MMP12/SHH/POM121/HEATR3/RGPD8/CABP1/MBTPS1/SUFU/HDAC3/IPO13/TSC2/CD36/ECT2/NUP133/NUTF2/PSEN1/RBM22/NUP62/PPP1R10/FAM53C/SYK/RAN/PRICKLE1/GEMIN8/TPR/IPO8/CHP1/CBLB/KPNA3/DDX20/TNPO2/HSP90AB1/NUP50/TARDBP/DMAP1/MDFIC/UBR5/HTATIP2/NOLC1/TMCO6/KPNB1/NUP214/HIKESHI/MED1/RANBP6/CSE1L/JAK2/JUP/PRKCD/GEMIN6/MAPK14/SNRPF/PML/TRIM28/HNRNPA1/SNRPG/UFM1/NUP188/SNRPB/CDKN1A/NUP35/PKIA/E…
GOBP_REGULATION_OF_VESICLE_MEDIATED_TRANSPORT	GOBP_REGULATION_OF_VESICLE_MEDIATED_TRANSPORT	489	0.307903	1.21991	0.00279337	0.0919529	0.0789826	10401	tags=60%, list=56%, signal=27%	APOA5/SYT10/HTR1B/HAP1/SFTPD/SH3GL3/CACNA1I/DRD4/SYT2/NOD2/STX1B/DRD2/SNCA/ABCA7/AZU1/DOC2A/CCR2/P2RX1/ITGA2/SIRPB1/CADPS/DLG4/PRKAR1B/TNF/SPHK1/IL1RAPL1/STON2/VPS18/NDRG4/GAS1/LILRB1/CFTR/RAB25/SYP/SYT17/RAB5C/SNX33/MAPK3/ADORA2A/CLEC7A/HFE/TBC1D4/C4B/LDLRAP1/STXBP5L/LMAN2/MBTPS1/RAB27B/PKDCC/LGALS9/IL4R/BMP2K/ANKRD13D/ARC/STXBP2/REST/TSC2/CD36/ARRB1/TLR2/CNR1/CDK5/CD14/SNX12/APOC2/FER/RUFY1/ZFY…
GOMF_BITTER_TASTE_RECEPTOR_ACTIVITY	GOMF_BITTER_TASTE_RECEPTOR_ACTIVITY	15	-0.453412	-1.97994	0.00280625	0.0919529	0.0789826	1088	tags=47%, list=6%, signal=44%	TAS2R30/TAS2R50/TAS2R39/TAS2R1/TAS2R8/TAS2R7/TAS2R9
GOBP_CELL_CYCLE_ARREST	GOBP_CELL_CYCLE_ARREST	228	0.333316	1.28482	0.00283036	0.0919529	0.0789826	9292	tags=58%, list=50%, signal=30%	PRKAG3/ERN2/CDKN2A/DUSP1/BRCA1/MUC1/CNOT1/DDIAS/GAS1/HMGN5/CRADD/SLC38A9/ZBTB49/PRKAB2/RRAGB/TNKS1BP1/ARID3A/PRKAB1/HBP1/PKD1/JMY/BTG2/CDKN2D/E2F4/TBRG1/CDK4/SGSM3/ID2/MED25/APBB1/RASSF1/CDK5/CARM1/PRKAA2/CDC25C/CDK6/ZNF385A/NOTCH2/PRMT1/PLK3/WDR6/MDM4/MSH2/GAS2L1/ERN1/KLLN/ADAM10/RRAGC/KMT2E/MAPK12/HSP90AB1/EP300/CNOT6/CALR/AURKA/TSG101/IRF1/LAMTOR1/IRF6/CNOT6L/KAT2B/BARD1/SDE2/CNOT4/CAB39/TBRG4…
GOBP_IN_UTERO_EMBRYONIC_DEVELOPMENT	GOBP_IN_UTERO_EMBRYONIC_DEVELOPMENT	327	0.316889	1.23867	0.00283036	0.0919529	0.0789826	10184	tags=60%, list=55%, signal=28%	SLC5A7/HS3ST6/MYH6/C6orf141/GJB5/AGBL4/ASCL2/APOB/DSC3/TGFB3/WNT9B/SOX15/OVOL2/CNOT1/ETV2/MSX1/ZBED6/PHLDA2/TTLL1/JUNB/HSD17B2/ACVR1C/CELF4/INPP5B/PELO/PLCD3/BMP7/LPAR6/ACVR1/ADA/PKD1/UNK/ZFP36L1/SENP2/PTCH1/SLC35E2B/PPP4R4/PTPN18/WDTC1/FBLL1/PCDH12/SH3PXD2A/APBA3/SLC30A1/CHD8/SPINT2/TANC2/DAD1/PDGFB/SYF2/OTUD7B/NLE1/RIC8A/TERF2/NOTCH2/MDFI/NEK2/C2CD3/EIF2S2/HEG1/SPINT1/PRPF19/PRMT1/MBD3/KAT2A/BY…
GOCC_CLATHRIN_COATED_VESICLE	GOCC_CLATHRIN_COATED_VESICLE	186	0.344145	1.31552	0.00283036	0.0919529	0.0789826	6945	tags=48%, list=37%, signal=31%	ENTHD1/CHRM2/SFTPD/SYT2/CD207/SFTPA1/APOB/MALL/TFRC/CD3G/FCHO1/STON2/VPS18/HBEGF/ADRB2/CFTR/ABCB4/TGFA/CTLA4/DENND1C/SYNRG/LDLRAP1/AP1G2/NRGN/RAB27B/AP1M1/AP2A2/AP1S1/CPNE6/STEAP2/RASSF9/AP1B1/RAB35/EPN1/CLTB/LRP2/TMED10/VPS33A/VPS11/GOPC/AP2B1/CLTC/CD4/NUMB/CD3D/AP2M1/ECE1/FCGR1B/FZD4/ADAM10/SGIP1/HAX1/VAMP3/HIP1R/INPP5F/EGFR/DVL2/AP2S1/SLC2A4/RAB14/SNX9/SNX3/PIK3C2A/RAB13/HLA-DQA1/CD74/AP1M2/SL…
GOBP_PROTEIN_MONOUBIQUITINATION	GOBP_PROTEIN_MONOUBIQUITINATION	64	0.418375	1.48625	0.00283319	0.0919529	0.0789826	8970	tags=67%, list=48%, signal=35%	DDB2/RING1/DTL/RNF168/TRIM21/HUWE1/FANCM/ATXN7L3/RAD18/RNF126/DDB1/BCOR/PEF1/PAF1/SKP1/UBE2O/TSG101/FANCL/PEX12/WAC/PDCD6/RNF40/CUL3/MGRN1/UBE2B/PCGF2/LEO1/UBE2D3/PRKN/CUL1/UBE3D/KLHL22/PCGF1/TOPORS/CBL/CTR9/UBE2R2/RNF20/UHRF1/BMI1/PCGF5/UBB/PCGF3
GOCC_ENDOCYTIC_VESICLE_MEMBRANE	GOCC_ENDOCYTIC_VESICLE_MEMBRANE	156	0.351341	1.33022	0.00286736	0.0919529	0.0789826	9449	tags=63%, list=51%, signal=31%	CACNG8/WNT6/GRIA1/ATP6V0A4/CD207/APOB/GRIA3/DLG4/IRGM/RAB11FIP1/TCIRG1/STAB2/HVCN1/RILP/HBEGF/INPP5B/CAMK2G/AP2A2/NOS3/PTCH1/STAB1/HLA-C/CD36/RAB32/TLR2/AP2B1/CLTC/WNT3/RAC2/ATP6V0E2/AP2M1/ATP6V0A1/SNAP23/FCGR1B/FZD4/SGIP1/VAMP3/ATP6V0C/CALR/AP2S1/HLA-A/LAMP2/SEC22B/RAB22A/HLA-DQA1/CD74/HLA-E/UBA52/SH3GL2/RAB11B/HLA-DRB1/TAP2/HLA-F/PIKFYVE/MARCO/SCARB1/TBC1D5/CAMK2D/RAB10/MSR1/HLA-DQB1/WNT7B/FZD5…
GOMF_KINASE_REGULATOR_ACTIVITY	GOMF_KINASE_REGULATOR_ACTIVITY	207	0.336088	1.2913	0.00286736	0.0919529	0.0789826	8880	tags=55%, list=48%, signal=29%	TCL1A/PRKAG3/NRG1/CCKBR/SNCA/GPRC5C/CDKN2A/DBF4B/PRKAR1B/IRGM/ALKAL2/AFAP1L2/TRIB2/CISH/CCNO/CCNE1/RHOH/TESC/EPO/WDR91/CIT/CDKN2D/CAMK2N1/CDK4/GMFG/LRP6/SOCS7/ELP3/HEXIM1/CCNT1/MAPK8IP1/CNPPD1/CCNJL/ETAA1/FAF1/PIK3R3/CCNA1/TAOK3/CCNYL1/RAC2/WNK1/GPRC5A/CCNA2/CHP1/PPP1R1B/TAB1/SOCS4/CCNY/CCNT2/CALM2/HSP90AB1/DDX3X/DUSP19/GMFB/CCNB2/KAT2B/SPDYA/MALT1/ABI1/TOM1L1/CAB39/YWHAB/YWHAG/RICTOR/CDKN1C/DNAJ…
GOBP_POSTSYNAPTIC_SPECIALIZATION_ORGANIZATION	GOBP_POSTSYNAPTIC_SPECIALIZATION_ORGANIZATION	31	0.489698	1.5952	0.00287051	0.0919529	0.0789826	6257	tags=58%, list=34%, signal=39%	LRRTM1/GRID2/SHANK1/TMEM108/SYNGAP1/LRRC4/GAP43/NLGN2/CDH2/LRFN1/SHANK2/ZMYND8/NTNG2/NRXN1/LRRTM2/DLG1/IL1RAP/PTPRD
GOBP_ALCOHOL_METABOLIC_PROCESS	GOBP_ALCOHOL_METABOLIC_PROCESS	355	0.314965	1.23507	0.00290436	0.0921511	0.0791529	8445	tags=52%, list=45%, signal=29%	APOA5/AKR1B15/GPD1/NR0B2/ACER1/ADH1A/DBH/LRAT/CYP1A1/ITPKA/CYP7A1/CYP46A1/HMGCS2/AKR1B10/SNCA/CYP3A5/ADH4/MOGAT2/MIOX/ACER2/APOB/ADH6/CYP3A7/LCAT/RDH5/PLCD1/IPPK/APOF/SEC14L2/ALDH1A2/ASAH2/SPHK1/CYP51A1/INSIG1/CES1/GALK1/PLB1/CLCN2/APOBR/CFTR/INSIG2/INPP5B/CETP/ERLIN2/GPAM/ABCA1/PLCB4/COQ3/PLCD3/SULT2B1/RDH11/CYP1B1/INPP5J/ACADL/FDPS/LDLRAP1/ACADVL/BCO1/SCD/GDPD1/MBTPS1/PMVK/NFE2L1/DHRS4/FMO5/SOR…
GOBP_REGULATION_OF_CHEMOTAXIS	GOBP_REGULATION_OF_CHEMOTAXIS	212	0.336527	1.29337	0.00290436	0.0921511	0.0791529	7382	tags=45%, list=40%, signal=28%	S100A14/S100A7/NOD2/FEZF2/DEFB124/C5AR2/IL6/IL23A/AZU1/CCR2/EDN2/MMP28/ITGA2/CCL26/NTRK3/PLXNA3/DUSP1/DPP4/PADI2/ARTN/MPP1/NBL1/RIPOR2/SEMA4F/TIAM1/MAPK3/LGMN/JAM3/ZSWIM4/SEMA3B/SEMA3F/ZNF580/TIRAP/LGALS9/SEMA4B/AGER/GPSM3/PTK2B/CCR4/IL6R/CREB3/ADAM17/CXCL12/PDGFB/PRKD2/SEMA4D/P2RY12/DUSP3/OXSR1/RYK/CSF1R/WNT3/RAC2/WNK1/SWAP70/CCL2/ADAM10/AKIRIN1/TREM2/CALR/C3AR1/RAC1/CCL21/C5/CXCL13/NRP1/MCU/LBP…
GOBP_MALE_GENITALIA_DEVELOPMENT	GOBP_MALE_GENITALIA_DEVELOPMENT	18	0.55474	1.62784	0.00297604	0.0936074	0.0804037	2255	tags=50%, list=12%, signal=44%	KLHL10/SYCP2/WNT9B/HSD17B3/SHH/HOXA13/SRD5A1/ASB1/WT1
GOMF_RNA_POLYMERASE_II_SPECIFIC_DNA_BINDING_TRANSCRIPTION_FACTOR_BINDING	GOMF_RNA_POLYMERASE_II_SPECIFIC_DNA_BINDING_TRANSCRIPTION_FACTOR_BINDING	266	0.324279	1.25774	0.00297835	0.0936074	0.0804037	10361	tags=64%, list=56%, signal=29%	TCF23/NR0B2/BEX1/CDKN2A/BBS2/PADI2/CNOT1/BBS1/BCAS3/TCF21/TRERF1/FOXH1/STAT5B/SMARCD3/ESR1/RERG/PPARA/TADA3/ID2/NCOA3/MED25/LDB1/HDAC3/BBS7/RBL1/ARRB1/RXRA/MMS19/TAF1/KDM5D/PARP9/PRPF6/NOTCH2/JUND/SMARCB1/PSMA6/FAF1/WBP2/THRAP3/ASXL1/NR1H2/IFI27/ARNT/GABARAPL1/TAF11/EGR2/TACC1/GAS2L1/BBS5/CREB1/RNF6/HIPK2/UBA3/TBX3/SLC30A9/TRIM24/EP300/NCOA1/PPARD/TRIP12/CALR/MED4/FOXP1/TP53BP1/COMMD7/DMAP1/MED13…
GOBP_PROTECTION_FROM_NON_HOMOLOGOUS_END_JOINING_AT_TELOMERE	GOBP_PROTECTION_FROM_NON_HOMOLOGOUS_END_JOINING_AT_TELOMERE	10	0.666044	1.7258	0.00311062	0.0973056	0.0835803	5156	tags=80%, list=28%, signal=58%	ACD/TFIP11/DCLRE1C/TERF2/ERCC4/ERCC1/TERF2IP/DCLRE1B
GOBP_CYTOSKELETON_DEPENDENT_INTRACELLULAR_TRANSPORT	GOBP_CYTOSKELETON_DEPENDENT_INTRACELLULAR_TRANSPORT	190	0.333305	1.27639	0.00312634	0.0973403	0.0836101	10750	tags=67%, list=58%, signal=29%	MYO1A/HAP1/AGBL4/MYO7B/TMEM108/HOOK2/MREG/CEP131/BICDL1/PRKCZ/MYO1F/MAP1A/KIF5C/BICDL2/RAB27B/MYO15A/DYNC1I1/AP3M2/CCDC88B/AP3D1/TANC2/MYO19/DYNC1H1/CCDC88A/DYNC2H1/TERF2/IFT57/KIF5A/AP3S2/BLOC1S6/IFT22/MYO1C/TUBA1A/DST/MAP1B/MAPT/BBS12/AP3M1/ACTR10/SYBU/IFT74/FNBP1L/RAB21/APBA1/TTC30A/TUBA1C/SYT4/RAB6A/AP3B1/MYO1B/WDR19/MYO1E/MAP2/COPG1/SPG11/KIF1A/NDE1/UXT/MAP6/AP3B2/SOD1/DYNLL1/MAK/TTC21A/KIF1…
GOCC_A_BAND	GOCC_A_BAND	37	0.460848	1.53566	0.00315789	0.0978653	0.084061	4570	tags=49%, list=25%, signal=37%	SMTNL2/MYH1/MYL2/KLHL41/SMTNL1/CMYA5/OBSCN/MYOM3/ANK2/ANK1/LRRC39/MYOM2/MYOM1/FHL2/HDAC4/DST/KAT2B/PPP1R12A
GOBP_REGULATION_OF_NUCLEOCYTOPLASMIC_TRANSPORT	GOBP_REGULATION_OF_NUCLEOCYTOPLASMIC_TRANSPORT	102	0.380207	1.39955	0.00320034	0.0986921	0.0847712	9380	tags=69%, list=50%, signal=34%	CHP2/CAMK1/MX2/SHH/CABP1/SP100/SUFU/SIRT7/HDAC3/IWS1/CD36/CDK5/ECT2/NUTF2/PSEN1/RBM22/NUP62/RIOK2/IFI27/RAN/NEDD4/TPR/CHP1/CPSF6/HSP90AB1/SETD2/PPP1CC/TARDBP/DMAP1/BARD1/PPP1R12A/PARK7/MDFIC/CTDSPL2/UBR5/PTPN11/NOLC1/NUP214/JAK2/JUP/PRKCD/MAPK14/TRIM28/UFM1/TCF7L2/NRDE2/PKIA/EFCAB7/YWHAE/BMP4/PTPN14/TXN/GLI3/RBM4/IPO5/AKAP8L/SMO/PPM1A/DNAJC27/PIK3R2/NUP54/ZC3H12A/FERMT1/IFNG/RAPGEF3/ANGPT1/AAAS/G…
GOBP_POSITIVE_REGULATION_OF_CELL_CELL_ADHESION	GOBP_POSITIVE_REGULATION_OF_CELL_CELL_ADHESION	267	0.327149	1.26866	0.00323734	0.0986921	0.0847712	9976	tags=61%, list=54%, signal=29%	IL1A/FUT3/IL1RL2/CEACAM6/TNFRSF13C/NOD2/CLECL1/IL6/IL23A/PTPRU/CCR2/PRKCQ/SIRPB1/NLRP3/MYB/TFRC/TNF/DPP4/SHH/PAK1/ZAP70/ICOS/CD274/LILRB1/GCNT2/HHLA2/GPAM/PRKCZ/CTLA4/BMP7/RHOH/EPO/ADA/VSIR/PNP/STAT5B/LGALS9/IL4R/RASAL3/RARA/CCDC88B/AGER/ZBTB7B/AP3D1/PODXL/SART1/PLPP3/CD5/AFDN/TNFRSF14/FYN/CD4/NKAP/SYK/IRAK1/CD46/CD70/CCL2/RUNX1/PYCARD/MEGF10/HLA-A/NFKBIZ/IGFBP2/RAC1/CCL21/MALT1/CXCL13/CD1D/GRB2/…
GOBP_REGULATION_OF_HISTONE_MODIFICATION	GOBP_REGULATION_OF_HISTONE_MODIFICATION	135	0.355375	1.3332	0.00323734	0.0986921	0.0847712	8372	tags=58%, list=45%, signal=32%	NOS1/SNCA/PAX5/BRCA1/MYB/MUC1/BRD7/MAPK3/TADA2A/KDM5A/PHF19/AASS/ZNF304/WDR61/THAP7/TADA3/IWS1/ARRB1/ZBTB7B/AUTS2/PRKD2/RIF1/MTHFR/SETD7/SMARCB1/WBP2/SETD5/KAT2A/BCOR/NIPBL/PYGO2/OGT/ING2/RUVBL2/PAF1/KMT2E/TADA2B/TRIP12/ZNF335/JARID2/RPS6KA4/PARK7/UBR5/CHEK1/SART3/RNF40/SPI1/MTF2/RPS6KA5/PRKD1/KAT7/UBE2B/CHTOP/DNMT3B/CAMK2D/WDR5/DNMT1/PARG/ATM/NELFE/WDR70/NAP1L2/JDP2/SMAD4/BCL6/ZNF274/BRD4/AKAP8L…
GOBP_HISTONE_H3_ACETYLATION	GOBP_HISTONE_H3_ACETYLATION	60	0.416661	1.47028	0.00324382	0.0986921	0.0847712	9033	tags=62%, list=48%, signal=32%	BRCA1/TADA2A/TAF6L/MCM3AP/KAT6A/TADA3/LDB1/SMARCB1/WBP2/SUPT3H/KAT2A/BRPF1/TADA1/BRD1/TAF5L/KAT2B/ING5/DR1/CHEK1/NAA60/SPI1/MBIP/TAF5/MEAF6/KAT7/WDR5/TRIM16/NAP1L2/CRTC2/SMAD4/POLE3/SIN3A/SPHK2/KMT2A/YEATS2/JADE1/IRF4
GOBP_REGULATION_OF_CENTRIOLE_REPLICATION	GOBP_REGULATION_OF_CENTRIOLE_REPLICATION	21	0.540646	1.6355	0.00330188	0.100002	0.0858963	7456	tags=62%, list=40%, signal=37%	CEP295NL/C10orf90/BRCA1/CENPJ/MDM1/NUP62/KAT2A/KAT2B/NPM1/ALMS1/CEP120/RBM14/STIL
GOBP_NUCLEIC_ACID_PHOSPHODIESTER_BOND_HYDROLYSIS	GOBP_NUCLEIC_ACID_PHOSPHODIESTER_BOND_HYDROLYSIS	284	0.322722	1.2544	0.00334833	0.10095	0.0867105	10253	tags=63%, list=55%, signal=29%	MEI4/CPSF4L/ERN2/ANKRD31/DNASE1L3/IL6/SLFN13/ZC3H12B/APLF/EDC4/ST20/CNOT1/SMG6/POLD1/USB1/RAD9A/PELO/AZGP1/RNASEK/NMNAT1/ZC3H12C/PMS2/POLE/DDB2/DCLRE1C/ZC3H12D/RNASEL/RNASEH2A/TOE1/XPC/OGG1/POLD3/NYNRIN/EXOSC6/RNASEH1/TSEN34/POLD2/TBL3/FANCM/DCP1B/DNASE1/GTF2H3/DIS3L2/CPSF4/DCP1A/RFC1/NOP9/AGO1/EME2/RPP30/ENDOU/DDB1/RPP21/DCPS/CPSF3/FIP1L1/POP4/ENDOV/PLSCR1/RFC3/ERN1/DICER1/RIDA/ERCC4/ERCC1/CPSF6…
GOBP_MYELOID_CELL_DIFFERENTIATION	GOBP_MYELOID_CELL_DIFFERENTIATION	375	0.315576	1.23804	0.00342233	0.101845	0.0874792	10774	tags=67%, list=58%, signal=29%	IL31RA/CARTPT/MPL/GPR55/DHRS2/IL23A/PRKCQ/ALAS2/ITGA2B/CEBPE/TFRC/TNF/ITGB8/TCIRG1/ETV2/PIK3CD/IRF8/JUNB/KIT/LILRB1/CD109/UBD/GPR68/TESC/TLR3/EPO/SH2B3/LRRC17/NBEAL2/ZFP36L1/HOXA5/STAT5B/TIRAP/WDR61/KAT6A/RARA/LDB1/MAFB/PTK2B/SH3PXD2A/TLR2/INPP5D/P4HTM/CDK6/TNRC6B/TNRC6A/ZNF385A/ARID4A/VPS33A/AGO1/NOTCH2/PSEN1/GAB2/SCIN/CSF1R/MAEA/IL11/TCTA/PRMT1/CD4/ARNT/BRD1/THPO/RNF41/CREB1/ALAS1/PAF1/ANXA2/HI…
GOBP_NEGATIVE_REGULATION_OF_CELL_CYCLE_PHASE_TRANSITION	GOBP_NEGATIVE_REGULATION_OF_CELL_CYCLE_PHASE_TRANSITION	241	0.327758	1.26652	0.00345932	0.101845	0.0874792	10599	tags=66%, list=57%, signal=29%	C10orf99/HUS1B/TEX14/CDKN2A/DUSP1/USP44/BRCA1/MUC1/ORC1/CNOT1/PLK1/BRD7/CDT1/CRADD/TNKS1BP1/ARID3A/NACC2/PSMB10/PSMC1/BTG2/ZFYVE19/ZFP36L1/DTL/CDKN2D/E2F4/CDK4/RBL1/NAE1/CARM1/SYF2/CDC25C/ZWINT/CDK6/KANK2/ZNF385A/TRIM39/PSMA6/TAOK3/LCMT1/PSME4/PRMT1/PSME2/PLK3/MDM4/VPS4A/CDK2AP2/PSMB3/FBXO7/TPR/IK/BRCC3/PSME3/NABP2/CCL2/SKP1/CDC6/EP300/CNOT6/FAM122A/AURKA/AURKB/PSMC6/CNOT6L/MIIP/PSMG2/CNOT4/CENPF…
GOCC_AZUROPHIL_GRANULE	GOCC_AZUROPHIL_GRANULE	148	0.353373	1.33485	0.00345932	0.101845	0.0874792	9545	tags=61%, list=51%, signal=30%	PRSS2/ORM2/ABCA13/MPO/SERPINB3/S100A7/CEACAM6/RAB44/PIGR/AZU1/PLAC8/GALNS/MANBA/PADI2/MNDA/GGH/RAB5C/AGA/FUCA1/TXNDC5/IST1/DPP7/STXBP2/NCSTN/DYNC1H1/PSEN1/GM2A/GAA/TMEM179B/FUCA2/FAF2/SNAP23/ANXA2/IMPDH1/ATP6V0C/ACTR10/PYCARD/PRCP/LAMTOR1/C3AR1/LAMP2/MAN2B1/VCP/STOM/C6orf120/DSN1/CYB5R3/ADA2/BPI/DNAJC3/PRKCD/SNAP29/FTL/CTSC/ANXA11/B4GALT1/SDCBP/CTSG/MAGT1/RAP1B/GDI2/ATP8A1/DNAJC13/DNAJC5/FRK/BRI3…
GOMF_GROWTH_FACTOR_BINDING	GOMF_GROWTH_FACTOR_BINDING	130	0.35779	1.33873	0.00345932	0.101845	0.0874792	7192	tags=49%, list=39%, signal=30%	HAP1/IL36RN/WFIKKN2/IGFBPL1/TGFBR3L/HTRA4/IGFALS/NTRK3/TGFB3/DUSP1/IL1RN/IL1R2/CD109/ERBB2/ACVR1C/ACVR1/RHBDF1/TEK/PCSK6/CD36/NRDC/IL6R/ENG/PDGFB/LRP2/SHC1/NRP2/PXDN/HTRA3/HAX1/EGFR/VASN/FGFRL1/IGFBP2/LRRC32/CXCL13/NRP1/IGFBP4/IL6ST/CRIM1/TWSG1/SEC61B/RPS19/COL1A1/SRPX2/OSMR/COL1A2/LTBP2/FGFR4/IGFBP3/TRIM16/SORT1/IGF1R/RHBDF2/TGFBR1/IL2RG/GHRHR/FGFBP3/LTBP4/IL11RA/ACVR1B/GHR/IL2RB/FSTL4
GOBP_POSITIVE_REGULATION_OF_RECEPTOR_RECYCLING	GOBP_POSITIVE_REGULATION_OF_RECEPTOR_RECYCLING	13	0.623473	1.71502	0.00346066	0.101845	0.0874792	5536	tags=54%, list=30%, signal=38%	SNCA/PSEN1/ECE1/ANXA2/VAMP3/INPP5F/NSF
GOBP_REGULATION_OF_MACROPHAGE_ACTIVATION	GOBP_REGULATION_OF_MACROPHAGE_ACTIVATION	52	0.422932	1.46703	0.00346972	0.101845	0.0874792	8461	tags=62%, list=45%, signal=34%	IL31RA/PLA2G10/IL6/SPHK1/IL4R/IL13/TREM2/FCGR2B/PLA2G4A/ADGRF5/LBP/VSIG4/CD74/BPI/CTSC/MFHAS1/PTPRC/PJA2/ATM/MIF/CX3CL1/MYO18A/HSPD1/GRN/HAMP/TNIP2/NR1D1/RORA/TLR4/TLR6/ZC3H12A/CD200
GOBP_GENERATION_OF_PRECURSOR_METABOLITES_AND_ENERGY	GOBP_GENERATION_OF_PRECURSOR_METABOLITES_AND_ENERGY	491	0.303194	1.20125	0.00353332	0.102155	0.0877455	9240	tags=55%, list=50%, signal=28%	PKLR/ADRB3/GYS2/PRKAG3/COX6A2/MCHR1/GPD1/ADH1A/NOS2/HMGCS2/PRDM16/SNCA/ADH4/OXCT2/PPP1R3G/PYGL/ZBTB20/AKR7A3/ADH6/PYGM/ALDOC/FDX2/ASIP/GPX2/PASK/ETFB/RBKS/PHLDA2/GALK1/DMGDH/XDH/POM121/WDR93/THTPA/C15orf48/NFATC4/HK1/SRD5A1/NUP210/RUBCNL/ACO2/TAZ/PHKA2/COQ9/SLC25A4/ACADVL/NCF2/PPARA/PER2/COQ10A/DDIT4/PGAM1/PANK2/GPD2/PHKG2/PID1/NDUFS6/PCDH12/ACSS2/OXCT1/IDH3G/GLRX/ADH1C/NDUFS8/ACO1/FOXK1/FDXR/PRK…
GOCC_CONDENSED_CHROMOSOME	GOCC_CONDENSED_CHROMOSOME	204	0.337665	1.29632	0.00353332	0.102155	0.0877455	9091	tags=57%, list=49%, signal=29%	SYCE3/MEI4/HUS1B/TEX14/SYCP2/SYCE2/BRCA1/DDX11/TTN/PLK1/RAD9A/CDT1/DMC1/REC8/ADD3/CENPC/KMT5C/RSPH1/RGS12/LRWD1/DYNC1I1/CFDP1/CENPM/MLH1/TEX12/MLH3/DYNLT3/NUP133/ZWINT/CLASP2/SMC2/AURKC/RIF1/NEK2/STAG1/SS18L1/CENPS/NCAPH2/P3H4/SPAG5/CENPA/SPC25/NCAPD2/AURKB/PPP1CC/CENPW/SMC3/ORC2/SMC5/TP53BP1/AGO3/DSN1/HMGB2/CENPU/CENPF/SKA2/ITGB3BP/CHEK1/SGO1/NUP37/MAD1L1/SEH1L/HORMAD1/RASSF2/C14orf39/MEAF6/SYCP…
GOCC_RIBOSOMAL_SUBUNIT	GOCC_RIBOSOMAL_SUBUNIT	184	0.341584	1.30619	0.00353332	0.102155	0.0877455	10805	tags=71%, list=58%, signal=30%	MRPS24/HBA2/MRPL38/HBA1/RPL3L/FXR2/MRPL11/RPL21/MRPS31/MTERF4/MRPL21/MRPL46/RPL26L1/MRPL49/MRPS7/LARP4/MRPS12/RPS10/MPV17L2/MRPS27/MRPS18B/MCTS1/DDX3X/MRPS21/MRPL48/MRPS17/RPS12/MRPL17/MRPL51/EIF2D/RPL7L1/RPL3/RPS27/MRPS35/UBA52/MRPS22/RPS9/RPS28/RPL23A/MRPS15/RPL31/RPS23/MRPL18/RPS19/RPL37A/MRPS9/RPS3/RPL39L/RPS15A/RPL18/RPL11/MRPL13/RPL28/RPL5/RPL32/RPS8/RPS24/RPS18/RPL26/RPS4Y1/RPS25/MRPS28/MR…
GOBP_PROTEIN_POLYGLUTAMYLATION	GOBP_PROTEIN_POLYGLUTAMYLATION	13	0.622779	1.71311	0.00354161	0.102155	0.0877455	5085	tags=69%, list=27%, signal=50%	TTLL13P/TPGS1/TTLL6/TTLL1/TTLL11/TTLL7/TTLL5/TPGS2/CEP41
GOBP_AMEBOIDAL_TYPE_CELL_MIGRATION	GOBP_AMEBOIDAL_TYPE_CELL_MIGRATION	392	0.309489	1.21605	0.00360732	0.102406	0.0879609	9450	tags=54%, list=51%, signal=27%	PRSS3/TDGF1/FOXC2/ITGA2/ADTRP/KRT2/GPLD1/TNF/DPP4/OVOL2/SHH/TBX1/CARD10/PAK1/PIK3CD/KIT/HBEGF/RAB25/ACVR1C/BCAS3/SEMA4F/FGF7/CYP1B1/ATOH8/LGMN/BMP7/IQSEC1/NANOS1/ACVR1/RHOB/DDR2/ADAM9/STAT5A/SEMA3B/SP100/MAP3K3/SEMA3F/TEK/ZNF580/GNA12/NOS3/SEMA4B/CDH2/PTK2B/ID1/PLPP3/ADAM17/FER/PDGFB/ARID5B/PRKD2/SEMA4D/KANK2/CLASP2/RIC8A/PDCD10/P2RY12/PLCG2/PLXND1/SDC4/LAMA5/TESK1/NRP2/PIK3R3/HDAC5/SGPL1/TACSTD2…
GOBP_MYELOID_CELL_HOMEOSTASIS	GOBP_MYELOID_CELL_HOMEOSTASIS	138	0.353946	1.32999	0.00360732	0.102406	0.0879609	10109	tags=70%, list=54%, signal=32%	MPL/IL6/ALAS2/ETV2/PIK3CD/KIT/JAM3/EPO/SH2B3/ZFP36L1/HOXA5/STAT5B/LDB1/MAFB/FANCC/NCSTN/ADAM17/INPP5D/P4HTM/CDK6/ARID4A/MAEA/PRMT1/ARNT/BRD1/ALAS1/HIPK2/HSPA1A/KMT2E/L3MBTL3/ERCC2/DYRK3/GATA1/RBFOX2/G6PD/ADGRF5/HMGB2/IKZF1/CEBPG/MED1/STAT1/JAK2/MPIG6B/ETS1/RPS19/MAPK14/SPI1/HOXB6/RPS24/ANKRD54/KAT7/MFHAS1/ZNF16/RB1/RPS6/SP3/LYN/TMOD3/PDE4B/JAK3/SOD1/INHBA/ZFPM1/BMP4/SLC25A38/BPGM/HAMP/ACVR1B/BCL6…
GOCC_SPINDLE	GOCC_SPINDLE	364	0.310624	1.21891	0.00360732	0.102406	0.0879609	9129	tags=54%, list=49%, signal=28%	RASSF10/STX1B/CXCR2/DNAAF1/SPAG8/CAPN6/POC1A/IL17RB/DDX11/CEP19/CEP89/CRMP1/PLK1/FBF1/TUBGCP2/CDC25B/CEP85/KATNAL2/RSPH1/DCTN1/EVI5/DYNC1I1/TADA3/RMDN3/HDAC3/RASSF1/FAM161A/KLHL42/GPSM2/CEP104/DCDC2/SIRT2/HECW2/MMS19/PPP2R3C/ECT2/BEX4/RGS14/CLASP2/CEP44/AURKC/RIF1/NEK2/TACC3/NUMA1/NUP62/CLTC/INO80/PRPF19/MAEA/PPP2CB/STAG1/TMEM9/KAT2A/TBL1X/PLK3/INVS/VPS4A/TPR/IK/PRC1/BRCC3/SPAG5/NEDD1/KLHL21/CDC6…
GOCC_AMPA_GLUTAMATE_RECEPTOR_COMPLEX	GOCC_AMPA_GLUTAMATE_RECEPTOR_COMPLEX	22	0.531628	1.62401	0.00361178	0.102406	0.0879609	1633	tags=36%, list=9%, signal=33%	OLFM3/SHISA9/CACNG8/SHISA8/GRIA1/GRIA3/DLG4/ABHD6
GOBP_ALCOHOL_BIOSYNTHETIC_PROCESS	GOBP_ALCOHOL_BIOSYNTHETIC_PROCESS	146	0.350452	1.3221	0.00364431	0.1026	0.0881281	10058	tags=65%, list=54%, signal=30%	APOA5/ACER1/DBH/ITPKA/CYP7A1/HMGCS2/SNCA/ACER2/APOB/IPPK/SEC14L2/ASAH2/SPHK1/CYP51A1/INSIG1/CES1/CLCN2/CFTR/INSIG2/ERLIN2/GPAM/FDPS/SCD/MBTPS1/PMVK/REST/SREBF2/PTK2B/CYP2R1/TM7SF2/PRKAA2/PLCG2/NFYB/RAN/GOT1/HMGCR/PARK7/G6PD/HRH1/AGK/CYB5R3/CYP27B1/DHFR/KPNB1/PLEK/SRD5A3/GCH1/PTAFR/MVD/PTS/GPER1/NFYC/SP1/FASN/ITPKC/NSDHL/ELOVL6/APOE/SOD1/MAS1/DHCR24/SPR/LSS/SPTLC2/NFKB1/MBTPS2/QDPR/FGF2/AKR1B1/CAC…
GOBP_NUCLEOTIDE_SUGAR_BIOSYNTHETIC_PROCESS	GOBP_NUCLEOTIDE_SUGAR_BIOSYNTHETIC_PROCESS	21	0.536955	1.62433	0.00364945	0.1026	0.0881281	6437	tags=67%, list=35%, signal=44%	RENBP/UAP1L1/AMDHD2/PMM1/NANS/MPI/GMPPB/PMM2/PGM3/GFPT1/GNPNAT1/GNPDA1/SLC35D1/UAP1
GOBP_POSITIVE_REGULATION_OF_ORGANELLE_ASSEMBLY	GOBP_POSITIVE_REGULATION_OF_ORGANELLE_ASSEMBLY	61	0.411994	1.4589	0.00371831	0.103395	0.0888108	8155	tags=61%, list=44%, signal=34%	HAP1/SAXO1/TNF/CENPJ/CNOT1/BECN1/FSCN1/ULK1/LCP1/GPSM2/MARK4/RALB/DYNC1H1/CCDC88A/NUMA1/NUP62/SDC1/SDC4/SPAG5/CNOT6/CNOT6L/G3BP1/SH3GLB1/RAB3GAP2/ATMIN/ARHGAP35/MNS1/SDCBP/G3BP2/CEP120/WRAP73/DYNLL1/SRC/IL5/FUZ/MSN/RAB3GAP1
GOBP_RECEPTOR_RECYCLING	GOBP_RECEPTOR_RECYCLING	29	0.496303	1.59227	0.00373002	0.103395	0.0888108	5803	tags=52%, list=31%, signal=36%	SNCA/ACHE/ARFGEF2/PSEN1/CHMP5/ECE1/ANXA2/VAMP3/INPP5F/LAMTOR1/EHD3/RAB11B/AP1AR/NSF/PLEKHJ1
GOBP_HISTONE_DEACETYLATION	GOBP_HISTONE_DEACETYLATION	73	0.409808	1.46695	0.00375531	0.103395	0.0888108	8369	tags=63%, list=45%, signal=35%	HDAC10/PRDM5/TRERF1/RCOR3/KDM5A/PER2/HDAC11/TADA3/SIRT7/HDAC3/REST/ZBTB7B/SIRT2/PRKD2/ELK4/SIN3B/HDAC4/HDAC5/TBL1X/NIPBL/ING2/MORF4L1/HDAC2/SUDS3/HDAC8/HDAC1/MTA1/PRKD1/MTA3/MIER1/CAMK2D/HDAC9/SIRT3/JDP2/BCL6/HDAC6/RBM14/TBL1Y/PHB/AKAP8L/MORF4L2/VEGFA/SIN3A/MTA2/ZNF541/SPHK2
GOBP_POST_TRANSLATIONAL_PROTEIN_MODIFICATION	GOBP_POST_TRANSLATIONAL_PROTEIN_MODIFICATION	350	0.312876	1.22651	0.00375531	0.103395	0.0888108	10716	tags=64%, list=57%, signal=28%	APOA5/SERPIND1/FBXW12/KLHL41/AGBL4/MSLN/SERPINC1/CHGB/NOTUM/FBXW10/IL6/ASB12/KLHL3/CP/APOB/GPLD1/FEM1A/FBXO41/IRGM/CCDC8/FBXW9/KLHL20/FOLH1/CISH/FBXO10/CHM/GAN/UBD/ASB1/DDB2/CUL9/RABGGTA/FBXO32/PSMB10/PSMC1/MBTPS1/FBXO11/DTL/NUCB1/FAM20C/DCAF4/FBXL20/FBXW5/WDTC1/CDH2/CCDC22/KLHL42/NAE1/P4HB/DCAF11/FBXO21/APLP2/QSOX1/LRRC41/P3H1/DDB1/GPS1/FBXL12/PSMA6/PRKCSH/UBE2M/LCMT1/PSME4/PSME2/RHBDD1/KBTBD7/P…
GOMF_GTPASE_BINDING	GOMF_GTPASE_BINDING	214	0.336729	1.29487	0.00375531	0.103395	0.0888108	9146	tags=57%, list=49%, signal=29%	ITPKA/BICDL1/BECN1/PAK1/RILP/CHM/ABCA1/HACE1/RGPD8/RRAGB/RHOH/FGD2/ULK1/RABGGTA/LCP1/EVI5/SGSM3/TRIOBP/EXOC4/TSC2/ECT2/AKAP13/PIH1D2/PPP6R1/RUSC2/DOCK4/RASA1/ATG16L1/XPO5/NUTF2/AFDN/SH3GL1/MYO1C/EHD1/GCC2/RASGRP3/IPO8/MICALL2/RNF41/KCTD13/RRAGC/EXOC2/AP3M1/GGA1/DVL2/AMBRA1/FMNL1/MAPKAP1/ARHGAP1/LAMTOR1/HPS6/AIMP1/FNBP1L/GNB1/NCKAP1/RALBP1/RAB3GAP2/PEX5/FGD1/YBX1/DNM1L/ENO1/NSF/TBC1D20/CYFIP1/PDE6…
GOBP_GLYCOSYLATION	GOBP_GLYCOSYLATION	252	0.326415	1.26318	0.00382967	0.104144	0.0894542	9361	tags=58%, list=50%, signal=29%	GCNT7/MUC5B/FUT3/MUC5AC/ST8SIA3/FUT6/MUC4/MUC12/ST8SIA2/GALNT8/MUC3A/ASGR1/MUCL1/B3GALT2/ACER2/SLC51B/AQP11/GALNTL6/B3GALNT2/GALNT15/MUC1/FUT9/B3GALT1/GALNT12/GCNT2/ALG10/ST6GALNAC4/B3GNT7/NUDT14/UGGT2/MGAT3/GAL3ST1/ST6GALNAC2/B3GALT4/POFUT2/B4GALT3/MPDU1/PMM1/ALG6/B3GNT8/ALG11/DOLPP1/PIGV/ALG3/POMT1/GORASP1/DAD1/NANS/MPI/TMTC3/FKRP/GALNT9/MGAT4C/GALNT10/PSEN1/UGGT1/SLC35C2/GALNT16/COG7/ST6GAL2/E…
GOBP_NEGATIVE_REGULATION_OF_TRANSFERASE_ACTIVITY	GOBP_NEGATIVE_REGULATION_OF_TRANSFERASE_ACTIVITY	274	0.323192	1.25527	0.00382967	0.104144	0.0894542	10969	tags=66%, list=59%, signal=28%	SERPINB3/WEE2/SNCA/SPRED3/CDKN2A/PRKAR1B/DUSP1/USP44/NPPA/TRIB2/PLK1/EPHA1/PIK3IP1/ADORA2A/AJUBA/BMP7/RHOH/TESC/TARBP2/CEP85/SH2B3/CIT/CDKN2D/CAMK2N1/TEN1/GMFG/LRP6/TSC2/DUSP18/HEXIM1/DUSP16/RGS14/DUSP14/MAPK8IP1/IRAK3/DUSP3/SPRY1/PSEN1/NUP62/HEG1/GPS1/TESK1/TAOK3/NF2/WNK1/GPRC5A/FBXO7/MEN1/CHP1/SMPD1/PPP1R1B/MAPT/SOCS4/CBLB/SRCIN1/ITGB1BP1/POT1/PYCARD/TRIM27/CEACAM1/DUSP19/GMFB/TSG101/KAT2B/PTPN…
GOMF_PROTEIN_DEACETYLASE_ACTIVITY	GOMF_PROTEIN_DEACETYLASE_ACTIVITY	22	0.530292	1.61993	0.0038411	0.104144	0.0894542	8071	tags=77%, list=43%, signal=44%	HDAC10/HDAC11/SIRT7/HDAC3/SIRT2/HDAC4/HDAC5/HDAC2/SUDS3/HDAC8/HDAC1/MIER1/HDAC9/SIRT3/HDAC6/SIRT5/MTA2
GOMF_PHOSPHOTYROSINE_RESIDUE_BINDING	GOMF_PHOSPHOTYROSINE_RESIDUE_BINDING	44	0.454694	1.54819	0.00384503	0.104144	0.0894542	7442	tags=61%, list=40%, signal=37%	ZAP70/MAPK3/LDLRAP1/SHE/VAV2/RASA1/PLCG2/SHC1/SHB/CRKL/PIK3R3/SYK/CBLB/PTPN5/FGR/GRB2/LCK/PTPN11/NCK2/PTPN6/SHF/SH3BP2/CRK/SH2D3C/ABL2/CBL/SHD
GOBP_ARF_PROTEIN_SIGNAL_TRANSDUCTION	GOBP_ARF_PROTEIN_SIGNAL_TRANSDUCTION	19	0.542576	1.60987	0.00386268	0.104198	0.0895008	6616	tags=63%, list=35%, signal=41%	IQSEC3/PSD/IQSEC1/PSD4/CYTH4/GBF1/ARFGEF2/PSD3/MAP4K4/CYTH3/ARFGEF3/MAPRE2
GOBP_REGULATION_OF_RECEPTOR_RECYCLING	GOBP_REGULATION_OF_RECEPTOR_RECYCLING	22	0.530096	1.61933	0.00387932	0.104225	0.0895241	5536	tags=50%, list=30%, signal=35%	SNCA/ACHE/PSEN1/CHMP5/ECE1/ANXA2/VAMP3/INPP5F/LAMTOR1/AP1AR/NSF
GOBP_REGULATION_OF_APOPTOTIC_SIGNALING_PATHWAY	GOBP_REGULATION_OF_APOPTOTIC_SIGNALING_PATHWAY	327	0.313928	1.2271	0.00390403	0.104468	0.0897324	11037	tags=70%, list=59%, signal=29%	IL1A/DBH/S100A9/TNFSF10/BRCA1/MUC1/TNF/ASAH2/NOL3/BDKRB2/MSX1/BECN1/DDIAS/CRADD/NFATC4/ACVR1/RNF183/TMC8/NACC2/MPV17L/EPO/WWOX/G0S2/SP100/BCL2L14/CDKN2D/NOS3/FIGNL1/CREB3/P4HB/MAPK7/CXCL12/SGMS1/FIS1/NLE1/MAPK8IP1/ZNF385A/TRIM39/PSEN1/BBC3/EYA3/CTNNA1/TMEM161A/FAF1/BCL2L2/FYN/IVNS1ABP/YAP1/SIAH2/PPIF/ING2/PDX1/RBCK1/PSME3/GNAI3/HSPA1A/GPX1/DDX3X/PYCARD/NDUFS3/VDAC2/GATA1/RIPK3/TRAF7/PTPN1/ZC3HC1/…
GOBP_INTERFERON_BETA_PRODUCTION	GOBP_INTERFERON_BETA_PRODUCTION	50	0.428907	1.48028	0.00399836	0.106173	0.0911973	9171	tags=72%, list=49%, signal=37%	DHX58/TLR7/IRF5/LILRB1/NMI/NLRC3/IRF3/TLR3/NLRX1/TIRAP/POLR3B/RNF216/POLR3F/TLR2/DDX3X/PYCARD/IRF1/YY1/POLR3G/CACTIN/IRF7/HMGB2/TOMM70/PTPN11/RIOK3/PPM1B/TICAM1/RELB/RIPK2/POLR3C/REL/TLR4/TRAF3/TRIM56/HSP90AA1/IFIH1
GOBP_POSITIVE_REGULATION_OF_ENDOTHELIAL_CELL_MIGRATION	GOBP_POSITIVE_REGULATION_OF_ENDOTHELIAL_CELL_MIGRATION	100	0.376857	1.38528	0.00405275	0.106173	0.0911973	9348	tags=62%, list=50%, signal=31%	TDGF1/FOXC2/GPLD1/PIK3CD/BCAS3/ATOH8/LGMN/RHOB/STAT5A/MAP3K3/TEK/ZNF580/NOS3/PTK2B/PLPP3/ADAM17/PDGFB/PRKD2/NRP2/ITGB1BP1/CALR/FOXP1/RAC1/PIK3C2A/NRP1/SASH1/GPI/VEGFC/AAMP/PDCD6/ETS1/SRPX2/PRKD1/TMSB4X/SCARB1/NFE2L2/FUT1/SP1/SEMA5A/RIN2/HDAC9/GRN/SMOC2/BMP4/RHOJ/RRAS/PRKCA/FGF2/VEGFA/CIB1/ZC3H12A/ANGPT4/PIK3CG/ROCK2/ITGB3/ANGPT1/PIK3CB/HMOX1/AKT1/ANXA3/HIF1A/GATA2
GOBP_PROTEIN_IMPORT	GOBP_PROTEIN_IMPORT	190	0.329241	1.26083	0.00405275	0.106173	0.0911973	10295	tags=63%, list=55%, signal=28%	CHP2/RGPD1/RGPD3/MMP12/GPIHBP1/SHH/POM121/HEATR3/RGPD8/SNX33/CABP1/MBTPS1/TOMM20L/SUFU/HDAC3/IPO13/TSC2/CD36/ECT2/NUP133/NUTF2/PSEN1/RBM22/NUP62/PPP1R10/FAM53C/SYK/RAN/PRICKLE1/TPR/IPO8/CHP1/CBLB/KPNA3/TNPO2/HSP90AB1/TOMM22/LAMP2/NUP50/TARDBP/PEX12/DMAP1/PEX19/TIMM17B/MDFIC/UBR5/TOMM70/GRPEL1/NOLC1/GRPEL2/TMCO6/PEX10/PEX6/KPNB1/NUP214/HIKESHI/MED1/RANBP6/CSE1L/PEX5/JAK2/JUP/PRKCD/MAPK14/ROMO1/PEX…
GOMF_KINASE_INHIBITOR_ACTIVITY	GOMF_KINASE_INHIBITOR_ACTIVITY	66	0.409	1.45492	0.00405275	0.106173	0.0911973	7589	tags=56%, list=41%, signal=33%	SNCA/CDKN2A/PRKAR1B/TRIB2/RHOH/TESC/CIT/CDKN2D/CAMK2N1/GMFG/LRP6/HEXIM1/MAPK8IP1/TAOK3/WNK1/CHP1/PPP1R1B/DUSP19/GMFB/KAT2B/YWHAB/YWHAG/CDKN1C/DNAJC3/NPM1/MBIP/CDKN1A/DUS2/PRKAG2/SH3BP5L/PKIA/TRIB1/SPRED2/SPRED1/CDKN2B/NCK1/SH3BP5
GOBP_NEGATIVE_REGULATION_OF_ALPHA_BETA_T_CELL_PROLIFERATION	GOBP_NEGATIVE_REGULATION_OF_ALPHA_BETA_T_CELL_PROLIFERATION	12	0.640719	1.72586	0.0041082	0.106173	0.0911973	5097	tags=75%, list=27%, signal=55%	LGALS9C/CD274/VSIR/LGALS9/ZBTB7B/TNFRSF14/CBLB/LGALS9B/TWSG1
GOBP_INTERFERON_GAMMA_MEDIATED_SIGNALING_PATHWAY	GOBP_INTERFERON_GAMMA_MEDIATED_SIGNALING_PATHWAY	88	0.382234	1.39044	0.00412711	0.106173	0.0911973	6524	tags=50%, list=35%, signal=33%	TRIM31/TRIM34/IRGM/IRF5/OAS1/IRF8/NMI/IRF9/TXK/IRF3/CAMK2G/SP100/TRIM22/TRIM21/HLA-C/PARP9/NR1H2/TRIM26/FCGR1B/HSP90AB1/IRF1/HLA-A/IRF6/PIAS1/IFNGR2/IRF7/HLA-DQA1/MED1/HLA-E/STAT1/JAK2/PRKCD/HLA-DRB1/PTAFR/VCAM1/HLA-F/PML/HPX/OAS2/CAMK2D/JAK1/IFNGR1/TRIM68/HLA-DQB1
GOBP_REGULATION_OF_MAP_KINASE_ACTIVITY	GOBP_REGULATION_OF_MAP_KINASE_ACTIVITY	300	0.317397	1.23654	0.00412711	0.106173	0.0911973	9278	tags=58%, list=50%, signal=29%	SERPINB3/GRM4/ERN2/NRG1/CHRNA7/DRD4/NOD2/GNG3/TDGF1/MST1R/SPRED3/ADRA2B/AVPI1/NTRK3/TGFB3/DUSP1/TNF/KSR1/RASGRP1/NPPA/PAK1/TRIB2/KIT/ERBB2/MAPK10/TIAM1/TGFA/MAPK3/AJUBA/BMP7/FGD2/EPHA4/SH2B3/UBE2V1/MAP2K7/AGER/PTK2B/ARRB1/DUSP18/DUSP16/PDGFB/AKAP13/RGS14/MAP3K4/DUSP14/MAPK8IP1/IRAK3/PDCD10/DUSP3/SPRY1/PSEN1/SHC1/S1PR2/NUP62/GPS1/CRKL/TAOK3/TAB3/SHC2/SYK/MAP4K5/SMPD1/IRAK1/ERN1/TAB1/FZD4/EGFR/LPAR…
GOCC_RIBOSOME	GOCC_RIBOSOME	219	0.334395	1.28713	0.00412711	0.106173	0.0911973	10805	tags=69%, list=58%, signal=29%	MRPS24/HBA2/MRPL38/HBA1/RPL3L/FXR2/MRPL11/RPL21/MRPS31/MTERF4/AURKAIP1/MRPL21/MRPL46/RPL26L1/MRPL49/MRPS7/LARP4/MRPS12/RPS10/MPV17L2/MRPS27/MRPS18B/PTCD3/LARP1/MCTS1/DDX3X/MRPS21/MRPL48/MRPS17/RPS12/MRPL17/MRPL51/EIF2D/RPL7L1/RPL3/RPS27/APEX1/MRPS35/EIF2AK4/UBA52/MRPS22/RPS9/RPS28/RPL23A/MRPS15/RPL31/RPS23/MRPL18/RPS19/RPL37A/MRPS9/RPS3/RPL39L/SERP1/RPS15A/RPL18/RPL11/MRPL13/RPL28/RPL5/RPL32/RPS8…
GOCC_TRANSFERASE_COMPLEX_TRANSFERRING_PHOSPHORUS_CONTAINING_GROUPS	GOCC_TRANSFERASE_COMPLEX_TRANSFERRING_PHOSPHORUS_CONTAINING_GROUPS	241	0.325927	1.25944	0.00412711	0.106173	0.0911973	10662	tags=67%, list=57%, signal=29%	PRKAG3/PRIM2/BECN1/POLD1/PIK3CD/CISH/CCNO/ACVR1C/VAC14/CCNE1/PRKAB2/POLE/POLA2/RECQL5/ULK1/ACVR1/TAF6L/PHKA2/PRKAB1/CDKN2D/POLD3/WDR61/CDK4/POLR3B/TADA3/POLD2/SOCS7/PHKG2/POLR3F/IFIT5/CDK5/GTF2H3/MMS19/TAF1/POLR2A/CCNT1/CDK6/CNPPD1/GTF2F1/CCNJL/PIK3R3/CCNA1/SETD5/SUPT3H/GTF2F2/POLA1/KAT2A/TAF11/CCNA2/POLR1B/PHKB/ERN1/SOCS4/PAF1/UVRAG/CCNY/REV3L/CCNT2/TAF5L/PYCARD/CCNB2/ERCC2/POLR3E/POLR3G/RPAP2/P…
GOMF_UNFOLDED_PROTEIN_BINDING	GOMF_UNFOLDED_PROTEIN_BINDING	104	0.374832	1.38011	0.00412711	0.106173	0.0911973	10145	tags=74%, list=54%, signal=34%	ERN2/HSPA1L/HEATR3/CHAF1A/UGGT2/PDRG1/DNAJB1/AFG3L2/UGGT1/SIL1/DNAJB2/ST13/RUVBL2/ERN1/LMAN1/HSPA1A/HSP90AB1/SERPINH1/CALR/DNAJA2/HTRA2/PPIB/HYOU1/PFDN2/CCT5/GRPEL1/GRPEL2/NAP1L4/CANX/DNAJB4/ERO1B/AIP/NPM1/ERLEC1/CLGN/DNAJA4/HSP90B1/NACA2/NACA/TCP1/TMEM67/DNAJB6/MDN1/HSPD1/CLU/CCT8/PPIA/NUDC/CCT4/CDC37L1/TOR1A/NACAD/SCG5/SYVN1/CRYAB/HSPA1B/DNAJA1/CLPX/HSPA14/HSP90AA1/TUBB4B/PFDN1/DNAJB5/TAPBP/HSP…
GOBP_NEGATIVE_REGULATION_OF_FATTY_ACID_METABOLIC_PROCESS	GOBP_NEGATIVE_REGULATION_OF_FATTY_ACID_METABOLIC_PROCESS	28	0.506633	1.61408	0.00414806	0.106302	0.0913076	4255	tags=54%, list=23%, signal=41%	UGT1A8/SLC22A13/CYP7A1/BRCA1/INSIG1/ERLIN2/MFSD2A/ACADL/ACADVL/SIRT4/WDTC1/CNR1/ETFBKMT/PIBF1/CEACAM1
GOBP_MACROMOLECULE_DEACYLATION	GOBP_MACROMOLECULE_DEACYLATION	104	0.374443	1.37867	0.00420147	0.106849	0.0917773	8838	tags=63%, list=47%, signal=34%	NOTUM/SPRED3/HDAC10/PRDM5/TRERF1/RCOR3/ABHD16A/KDM5A/PER2/HDAC11/SIRT4/TADA3/SIRT7/HDAC3/REST/ZBTB7B/SIRT2/BEX4/PRKAA2/PRKD2/ELK4/SIN3B/HDAC4/HDAC5/TBL1X/NIPBL/ING2/MAPT/MORF4L1/EP300/DYRK1A/HDAC2/SUDS3/HDAC8/TPPP/HDAC1/MTA1/PRKD1/MTA3/MIER1/CAMK2D/LYPLAL1/LYPLA2/LYPLA1/HDAC9/SPRED2/SIRT3/SPRED1/JDP2/BCL6/HDAC6/RBM14/TBL1Y/PHB/AKAP8L/ABHD12/MORF4L2/SIRT5/VEGFA/SIN3A/MTA2/ZNF541/SPHK2/FNTA/IFNG/MS…
GOCC_COATED_VESICLE_MEMBRANE	GOCC_COATED_VESICLE_MEMBRANE	174	0.339996	1.29685	0.00420147	0.106849	0.0917773	9472	tags=60%, list=51%, signal=30%	ENTHD1/CHRM2/SYT2/GRIA1/CD207/APOB/TFRC/CD3G/GOSR2/HBEGF/ADRB2/CFTR/TGFA/SYNRG/LDLRAP1/AP1G2/NRGN/SEC23B/AP1M1/AP2A2/AP1S1/RASSF9/AP1B1/RAB35/EPN1/SREBF2/HLA-C/COPZ2/CLTB/LRP2/TMED10/AP2B1/CLTC/CD4/CD3D/AP2M1/PEF1/FCGR1B/LMAN1/FZD4/SEC24B/SGIP1/VAMP3/HIP1R/EGFR/AP2S1/HLA-A/SEC22B/ARCN1/KDELR2/VMA21/VTI1B/HLA-DQA1/CD74/HLA-E/AP1M2/SLC18A1/SH3GL2/PDCD6/USO1/STX17/HLA-DRB1/COPZ1/COPB2/HLA-F/AP3B1/SE…
GOBP_PROTEIN_METHYLATION	GOBP_PROTEIN_METHYLATION	158	0.34546	1.30959	0.00427583	0.107212	0.0920891	8593	tags=55%, list=46%, signal=30%	METTL21C/BHMT/PRDM16/PAX5/BRCA1/MYB/PRDM5/N6AMT1/EHMT2/BTG2/KMT5C/FBXO11/PHF19/AASS/ZNF304/WDR61/SETD4/MECOM/SIRT7/IWS1/FBLL1/CARM1/PCMT1/AUTS2/ETFBKMT/DOT1L/ARID4A/RIF1/MTHFR/SETD7/SMARCB1/SETD5/LCMT1/PRMT1/BCOR/PCMTD2/PYGO2/PWP1/OGT/MEN1/CAMKMT/PAF1/KMT2E/SETD2/SMYD2/ZNF335/JARID2/METTL21A/SETD1B/CREBBP/RAB6A/SETD3/MTF2/SNRPB/DPY30/CHTOP/DNMT3B/WDR5/DNMT1/TET3/NELFE/SETD1A/FAM98A/PRMT3/ASH1L/SE…
GOBP_REGULATION_OF_CELL_CELL_ADHESION	GOBP_REGULATION_OF_CELL_CELL_ADHESION	411	0.307457	1.21087	0.00427583	0.107212	0.0920891	8808	tags=52%, list=47%, signal=28%	PLA2G2F/LGALS9C/IL1A/FUT3/IL1RL2/PCDH8/CEACAM6/SFTPD/TNFRSF13C/NOD2/CLECL1/IL6/IL23A/PTPRU/CCR2/PRKCQ/SIRPB1/TRPV4/ADTRP/NLRP3/DLG5/LAG3/MYB/TFRC/TNF/DPP4/IL1RN/SHH/FUT9/PAK1/ZAP70/ICOS/RIPOR2/CD274/LILRB1/ERBB2/GCNT2/HHLA2/GPAM/PRKCZ/CTLA4/HFE/BMP7/RHOH/CCL25/EPHA7/LRFN3/EPO/ADA/SH2B3/VSIR/PNP/STAT5B/PPARA/MINK1/LGALS9/C1QTNF1/IL4R/RASAL3/RARA/CCDC88B/SERPINE2/AGER/ZBTB7B/AP3D1/PODXL/AKNA/SPINT2…
GOBP_RESPONSE_TO_OXIDATIVE_STRESS	GOBP_RESPONSE_TO_OXIDATIVE_STRESS	419	0.305815	1.20485	0.00427583	0.107212	0.0920891	10783	tags=63%, list=58%, signal=27%	MPO/TAT/CA3/S100A7/DUOX2/DHRS2/EPX/KCNC2/SNCA/GPR37L1/IL6/TLDC2/GGT7/SRXN1/KCNA5/DUOX1/DUSP1/HBB/MYB/GPX2/NOL3/SPHK1/PAGE4/BECN1/HBA2/MICB/HBA1/MAPK3/MB/BTK/CYP1B1/BMP7/ANKZF1/MGAT3/RHOB/ALAD/ADA/ABCC2/ADAM9/NCF2/TXNRD2/ZNF580/OGG1/NFE2L1/TSC1/CBX8/ATRN/GNAO1/NOS3/REST/PTK2B/CD36/SESN1/FANCC/MSRB2/P4HB/SIRT2/UCP2/MAPK7/NDUFS8/FER/ECT2/PRKAA2/RGS14/PDCD10/PSEN1/SDC1/OXSR1/GPX4/TMEM161A/PXDN/PPP5C/…
GOBP_MEGAKARYOCYTE_DIFFERENTIATION	GOBP_MEGAKARYOCYTE_DIFFERENTIATION	71	0.392881	1.40397	0.0042801	0.107212	0.0920891	9631	tags=70%, list=52%, signal=34%	PRKCQ/ITGA2B/KIT/TESC/SH2B3/TNRC6B/TNRC6A/ZNF385A/AGO1/SCIN/IL11/PRMT1/THPO/KMT2E/EP300/RUNX1/GATA1/KAT2B/EIF6/AGO3/CNOT4/HMGB2/PTPN11/MED1/PTPN6/MPIG6B/HDAC1/MTURN/DPY30/ZNF16/WDR5/SP3/LOX/SETD1A/AGO4/ZFPM1/ASH2L/CDKN2B/SRF/SIN3A/CIB1/KMT2D/KMT2B/WASF2/KMT2A/RAB7B/GATA2/MEF2C/FAXDC2/UBA5
GOBP_NCRNA_METABOLIC_PROCESS	GOBP_NCRNA_METABOLIC_PROCESS	447	0.30459	1.20313	0.00435019	0.108167	0.09291	10892	tags=65%, list=58%, signal=28%	TRIM71/DDX4/ERN2/TDRD12/IL6/SLFN13/DDX47/USB1/TYW1B/PELO/PARS2/HELB/TARBP2/RNASEL/TOE1/CTU2/INTS9/INTS6L/TRMT10B/MEPCE/TRMT61B/AARS2/TSEN54/SARS2/URB1/EXOSC6/INTS5/SIRT7/TSEN34/KTI12/TDRKH/QTRT1/FBLL1/TBL3/DHX37/ELP3/DDX52/SART1/DIS3L2/GTPBP4/CPSF4/METTL6/PIH1D2/MRM1/NOP9/IMP4/HSD17B10/XPO5/TRMO/AGO1/ELP6/MTERF4/PES1/DPH3/NSUN6/RPP30/TYW5/SRRT/EBNA1BP2/DGCR8/RPP21/RIOK2/TRMT61A/ELP5/DDX18/BYSL/TR…
GOBP_SENSORY_PERCEPTION_OF_BITTER_TASTE	GOBP_SENSORY_PERCEPTION_OF_BITTER_TASTE	34	-0.28715	-1.69994	0.00435073	0.108167	0.09291	1098	tags=35%, list=6%, signal=33%	RTP3/TAS2R30/TAS2R50/RTP5/GNAT1/GNAT3/TAS2R39/TAS2R1/TAS2R8/TAS2R7/TAS2R9/TAS2R60
GOBP_REGULATION_OF_DEPHOSPHORYLATION	GOBP_REGULATION_OF_DEPHOSPHORYLATION	201	0.33495	1.28546	0.00442455	0.108494	0.0931901	8007	tags=50%, list=43%, signal=29%	CHP2/PPP1R27/DRD2/TMEM225B/ITGA2/GPLD1/TNF/CCDC8/SLC39A10/ELFN2/PKMYT1/SMG6/MTMR3/CSRNP3/ELFN1/PIN1/PCIF1/DMPK/DLC1/ZFYVE1/CDCA2/CD33/TSC1/CEP192/FKBP15/PPP4R4/RCAN3/RBM26/PPP2R2B/SYMPK/PPP2R3C/PPP6R1/SEMA4D/MTMR2/CNST/PPP1R37/CD2BP2/PPP1R10/PPME1/PPP1R2/PPP2R2A/WNK1/PPP4R2/SYTL2/CDH5/PPP1R14A/CHP1/SMPD1/ZCCHC9/PPP1R1B/MASTL/SWAP70/SMG7/PPP1R14D/CALM2/HSP90AB1/SHOC2/FAM122A/MTMR9/CAMTA1/RIPK3/ENS…
GOBP_REGULATION_OF_SMALL_MOLECULE_METABOLIC_PROCESS	GOBP_REGULATION_OF_SMALL_MOLECULE_METABOLIC_PROCESS	411	0.307371	1.21053	0.00442455	0.108494	0.0931901	9129	tags=55%, list=49%, signal=29%	UGT1A8/APOA5/NOS1/GPD1/SLC22A13/ACMSD/RD3/BHMT/CYP7A1/NOS2/DKKL1/GUCA1B/SNCA/MALRD1/PPP1R3G/ATCAY/ZBTB20/APOB/GPLD1/BRCA1/TNF/SEC14L2/PASK/PHLDA2/CYP51A1/INSIG1/CES1/KIT/CLCN2/C1QTNF3/POM121/ERLIN2/GPAM/COQ3/PRKAB2/MFSD2A/ACADL/FDPS/NUP210/RUBCNL/LDLRAP1/ACADVL/PSMB10/PSMC1/SCD/MBTPS1/PMVK/PPARA/C1QTNF1/DDIT4/SIRT4/PGAM1/NOS3/SIRT7/WDTC1/FMO5/REST/PANK2/PHKG2/PID1/SREBF2/PTK2B/TM7SF2/CNR1/APOC2/F…
GOCC_NUCLEAR_ENVELOPE	GOCC_NUCLEAR_ENVELOPE	444	0.298906	1.18018	0.00442455	0.108494	0.0931901	9443	tags=54%, list=51%, signal=27%	ATP1B4/RGPD1/MPL/DHRS2/RGPD3/P2RX1/GCHFR/MLIP/FAM156A/SPAG4/PLPP7/NELL1/MX2/ALOX5AP/GRK5/QRICH2/PAK1/POM121/RNF123/RGPD8/PRICKLE2/PRKCZ/MAPK3/CLMN/NUP210/DMPK/TMC8/ABCF1/IST1/NEMP1/CHMP7/DCTN1/DTL/MCM3AP/ATP2A3/CDK4/TMEM170A/PHF11/THAP7/INTS5/SENP2/MGST3/KLHDC2/SLC29A2/DTX2/OSBPL3/DHX37/TM7SF2/GNAZ/SLC30A1/DNASE1/SYNE1/PARP11/TMEM176B/GTPBP4/ERBIN/CUEDC2/NUP133/TNRC18/ZBED1/TEX2/NUTF2/BRIP1/PSEN1…
GOMF_HYDROLASE_ACTIVITY_ACTING_ON_CARBON_NITROGEN_BUT_NOT_PEPTIDE_BONDS_IN_LINEAR_AMIDES	GOMF_HYDROLASE_ACTIVITY_ACTING_ON_CARBON_NITROGEN_BUT_NOT_PEPTIDE_BONDS_IN_LINEAR_AMIDES	62	0.406866	1.44112	0.00442897	0.108494	0.0931901	8267	tags=66%, list=44%, signal=37%	PGLYRP1/ACER1/UPB1/ASPG/ACER2/PDF/ASAH2/HDAC10/AMDHD2/VNN2/AGA/NIT1/HDAC11/SIRT4/PIGL/SIRT7/HDAC3/SIRT2/NGLY1/HDAC4/HDAC5/NTAN1/HDAC2/SUDS3/BTD/HDAC8/HDAC1/FAAH/MIER1/GLS/NAAA/ASRGL1/ASPA/HDAC9/SIRT3/VNN1/HDAC6/SIRT5/FAAH2/MTA2/HINT1
GOMF_DIOXYGENASE_ACTIVITY	GOMF_DIOXYGENASE_ACTIVITY	89	0.382137	1.38971	0.00449891	0.109794	0.094307	8600	tags=58%, list=46%, signal=32%	KDM4E/ALOXE3/JMJD7/TMLHE/ASPHD1/ALKBH6/P3H3/HPD/BBOX1/OGFOD3/FTO/BCO1/KDM5A/PLOD1/KDM5B/KDM4A/RIOX1/P4HB/KDM5D/P4HTM/P3H1/TYW5/P3H2/P4HA1/ALKBH7/CDO1/UTY/ASPHD2/PHF8/ASPH/ALKBH2/KDM7A/ALKBH3/TET3/JMJD4/RIOX2/PIR/TDO2/P4HA2/BCO2/IDO1/KDM6B/ALOX5/KDM5C/TET2/KDM6A/TET1/KDM4C/HSPBAP1/PLOD2/HPDL/KDM3B
GOBP_CARNITINE_METABOLIC_PROCESS	GOBP_CARNITINE_METABOLIC_PROCESS	13	0.610495	1.67932	0.00451501	0.109794	0.094307	3047	tags=54%, list=16%, signal=45%	TMLHE/CRAT/BBOX1/ACADL/CPT1B/CPT2/CROT
GOCC_MUSCLE_MYOSIN_COMPLEX	GOCC_MUSCLE_MYOSIN_COMPLEX	14	0.591432	1.65519	0.00454667	0.110162	0.0946229	2421	tags=43%, list=13%, signal=37%	MYH8/MYH7/MYH6/MYH1/MYH2/MYL5
GOBP_REGULATION_OF_SIGNAL_TRANSDUCTION_BY_P53_CLASS_MEDIATOR	GOBP_REGULATION_OF_SIGNAL_TRANSDUCTION_BY_P53_CLASS_MEDIATOR	174	0.338809	1.29232	0.00457327	0.110405	0.0948317	10621	tags=68%, list=57%, signal=30%	PRKAG3/ATRIP/SPRED3/BRCA1/MUC1/BDKRB2/MSX1/RAD9A/BRD7/PRKAB2/PIN1/PRKAB1/EHMT2/JMY/KAT5/KAT6A/CHD3/CDK5/HEXIM1/TAF1/PRKAA2/ZNF385A/BRIP1/TTC5/MBD3/BRPF1/SUPT16H/PLK3/MDM4/TAF11/TP53RK/ING2/RFC3/PPP1R13B/HIPK2/TRIM24/EP300/AURKA/AURKB/TOP3A/DYRK3/DYRK1A/SMYD2/RNF34/BARD1/CSNK2A1/RBBP7/HDAC2/ING5/CD74/ARMC10/TAF15/CHEK1/MAPK14/RBBP8/RPL11/PML/HDAC1/RPL5/TAF5/RPL26/MEAF6/PRKAG2/RHNO1/RAD1/TAF9B/TAF4…
GOMF_N_ACETYLTRANSFERASE_ACTIVITY	GOMF_N_ACETYLTRANSFERASE_ACTIVITY	67	0.399433	1.42188	0.00464763	0.111795	0.0960257	6216	tags=49%, list=33%, signal=33%	NAT8/AANAT/NAA11/NAT8L/TADA2A/KAT5/MCM3AP/KAT6A/TADA3/NCOA3/ELP3/TAF1/NAT9/NAA10/NAA16/KAT2A/BRPF1/HAT1/BRD1/EP300/NCOA1/GTF3C4/SRCAP/KAT2B/NAT10/GNPNAT1/HGSNAT/CREBBP/NAA60/NAA50/MEAF6/KAT7/EPC1
GOBP_ACTIN_POLYMERIZATION_OR_DEPOLYMERIZATION	GOBP_ACTIN_POLYMERIZATION_OR_DEPOLYMERIZATION	202	0.335329	1.2869	0.00472199	0.112079	0.0962695	10774	tags=69%, list=58%, signal=30%	ARHGAP40/MAGEL2/TMSB15B/CCL26/SPIRE2/PLEKHH2/CARMIL1/PFN4/ARHGAP6/BAIAP2/CCL24/ADD3/JMY/COBL/CORO7/GMFG/CDC42EP1/TRIOBP/SSH3/PTK2B/FLII/MSRB2/SVIL/BAIAP2L1/CXCL12/FER/RASA1/SSH1/COTL1/SCIN/WASHC3/TTC17/CAPZB/MYO1C/CFL2/LMOD1/MICALL2/SWAP70/PREX1/HAX1/HIP1R/ESAM/PYCARD/TRIM27/FCHSD2/MTPN/GBA2/GMFB/SNX9/CAPG/RAC1/CCL21/ABI1/ARPC4/GRB2/NCKAP1/SPTBN5/ENAH/TMOD1/ARHGAP18/ARPIN/WASF3/ARPC5L/TWF1/RICTOR…
GOBP_REGULATION_OF_EPITHELIAL_CELL_DIFFERENTIATION	GOBP_REGULATION_OF_EPITHELIAL_CELL_DIFFERENTIATION	135	0.351154	1.31737	0.00472199	0.112079	0.0962695	8837	tags=58%, list=47%, signal=31%	NKX6-3/PAX8/SERPINB13/ASCL1/SPRED3/AJAP1/KRT36/WNT9B/FOXN1/TNF/OVOL2/ETV2/CD109/XDH/SULT2B1/APOLD1/ATOH8/MYCL/ZFP36L1/STAT5B/NCOA3/PTCH1/ID1/SPRY1/S1PR2/NUMA1/SGPP1/IL13/YAP1/MAFF/ZEB1/KLF7/CDH5/ZBED2/TBX3/HOXA7/RUNX1/CEACAM1/ZDHHC21/CYP27B1/DLL1/MED1/STAT1/PRKX/PLCB1/SOX9/BTG1/CTSL/OSR1/GRHL1/TRIM16/SERPINE1/AHI1/SPRED2/SPRED1/BMP4/NKX6-1/HES1/PROM1/HES5/FGF2/IKBKB/VEGFA/SMO/SFRP4/CCND1/MESP1/CA…
GOBP_REGULATION_OF_SYNAPSE_STRUCTURE_OR_ACTIVITY	GOBP_REGULATION_OF_SYNAPSE_STRUCTURE_OR_ACTIVITY	206	0.329118	1.26437	0.00472199	0.112079	0.0962695	10122	tags=61%, list=54%, signal=28%	IL1RAPL2/GRIN2B/LRRTM1/AMIGO3/CHRNB2/PCDH8/LRTM2/ITPKA/GRID2/SLIT1/STX1B/ADGRB3/NGEF/FRMPD4/FLRT3/DRD2/SNCA/LRFN2/NTN1/ARHGAP22/LRRN3/CAMK1/ZDHHC15/DLG5/ADGRL1/TNF/SYNGAP1/LZTS3/MX2/ZNF804A/IL1RAPL1/GPC6/LRP8/NFATC4/TIAM1/BHLHB9/DMPK/EPHA4/EPHA7/LRFN3/SEMA3F/DCTN1/NLGN2/ARC/DNM1/CDH2/TLR2/CDK5/TANC2/LRFN1/SEMA4D/NRP2/ADGRL2/SETD5/FYN/TUBA1A/NEDD4/ZMYND8/ADAM10/ADGRB1/SRCIN1/EEF2K/CUX2/NTNG2/ITSN1…
GOBP_AMYLOID_PRECURSOR_PROTEIN_CATABOLIC_PROCESS	GOBP_AMYLOID_PRECURSOR_PROTEIN_CATABOLIC_PROCESS	53	0.425099	1.48036	0.00472671	0.112079	0.0962695	7198	tags=53%, list=39%, signal=33%	HAP1/CHRNA7/ABCA7/TNF/PIN1/EPHA4/RTN2/SPON1/AGER/NCSTN/ADAM17/TMED10/PSEN1/ADAM10/APH1A/RTN3/DYRK1A/RTN1/SP1/LYN/RELA/IFNGR1/APOE/BIN1/IGF1/CLU/GGA3/BACE1
GOMF_G_PROTEIN_COUPLED_CHEMOATTRACTANT_RECEPTOR_ACTIVITY	GOMF_G_PROTEIN_COUPLED_CHEMOATTRACTANT_RECEPTOR_ACTIVITY	26	0.498727	1.57427	0.0048281	0.11379	0.0977394	2755	tags=35%, list=15%, signal=30%	CXCR5/CXCR1/CCR9/CXCR2/CCR2/GPR35/GPR75/CXCR3/CCR4
GOBP_POSITIVE_REGULATION_OF_NEUTROPHIL_MIGRATION	GOBP_POSITIVE_REGULATION_OF_NEUTROPHIL_MIGRATION	29	0.490065	1.57225	0.00483304	0.11379	0.0977394	6352	tags=52%, list=34%, signal=34%	IL23A/RIPOR2/CD99L2/TIRAP/RAC2/C3AR1/RAC1/CCL21/MCU/LBP/CD74/DNM1L/MOSPD2/C5AR1/CCL19
GOBP_NEGATIVE_REGULATION_OF_CELLULAR_AMIDE_METABOLIC_PROCESS	GOBP_NEGATIVE_REGULATION_OF_CELLULAR_AMIDE_METABOLIC_PROCESS	153	0.351019	1.32912	0.00487071	0.113872	0.09781	7611	tags=55%, list=41%, signal=33%	TRIM71/IGF2BP3/HAP1/CHRNA7/ABCA7/SPHK1/CNOT1/PATL2/CPEB1/CELF4/PIN1/PCIF1/NANOS1/FTO/ZC3H12D/UNK/RTN2/BTG2/ZFP36L1/CPEB3/TSC1/SPON1/FXR2/TNRC6B/TNRC6A/AGO1/UPF1/TYMS/ILF3/GIGYF2/TPR/C8orf88/RIDA/SAMD4B/EIF4EBP1/LARP1/DDX3X/CALR/RTN3/SHMT2/GRB7/CNOT6L/TARDBP/EIF6/GZMB/TIA1/AGO3/HNRNPR/GAPDH/ORMDL1/EIF4G1/DHFR/RC3H1/EIF2AK4/EIF4EBP3/RTN1/YTHDF3/YBX1/INPP5E/RPS3/MRPL13/PAIP2B/CELF1/ORMDL2/DAPK1/CPEB…
GOBP_NEGATIVE_REGULATION_OF_DNA_BINDING_TRANSCRIPTION_FACTOR_ACTIVITY	GOBP_NEGATIVE_REGULATION_OF_DNA_BINDING_TRANSCRIPTION_FACTOR_ACTIVITY	154	0.340961	1.29097	0.00487071	0.113872	0.09781	8808	tags=53%, list=47%, signal=28%	NLRP2B/NR0B2/PLA2G10/NOD2/SFRP5/NLRP12/CDKN2A/NLRP3/NLRC3/FOXH1/CYP1B1/BMP7/PKD1/SP100/NWD1/ESR1/FOXS1/SUFU/TRIM21/ID2/PTCH1/CCDC22/ARRB1/ID1/TAF1/TNFRSF4/HEYL/ERBIN/IRAK3/PTGIS/MDFI/HDAC4/FAF1/MEN1/CHP1/IRAK1/RBCK1/PYCARD/MAP3K10/COMMD7/ANXA4/CACTIN/HDAC2/CEBPG/EIF2AK4/HES6/ZNF675/NUPR1/IRAK2/TBX6/SIK1/USP7/MTURN/PIAS4/TMSB4X/G3BP2/TCF7L2/RB1/TAX1BP1/TRIB1/DAP/NFKBIB/CARD8/NFKBIA/LRRC14/PIM1/PEL…
GOBP_ORGANIC_ACID_CATABOLIC_PROCESS	GOBP_ORGANIC_ACID_CATABOLIC_PROCESS	250	0.32483	1.25708	0.00494507	0.114374	0.0982407	10443	tags=63%, list=56%, signal=28%	CYP4F3/NOS1/TAT/ACMSD/PON3/UROC1/NOS2/THNSL2/CYP2W1/PIPOX/HAO2/HOGA1/EHHADH/CYP4F12/ADTRP/ALDH8A1/AMT/ACAD11/BCKDHA/RENBP/MTHFS/CRAT/ETFB/ACOX3/HNMT/CYP26B1/CRYM/PLA2G15/LPIN3/AMDHD2/HPD/BCAT1/AGXT/MAT1A/MFSD2A/ACADL/ALDH1L1/CPT1B/SDSL/SLC27A2/ECHDC2/ACADVL/AASS/ABAT/PPARA/ACOT8/NOS3/SLC25A44/MCCC2/CPT2/SORD/GADL1/CNR1/ALDH5A1/AKR1D1/CRYL1/MCCC1/ETFBKMT/CROT/HSD17B10/ACAT1/ETFA/BCKDK/PCCB/MCEE/NU…
GOBP_REGULATION_OF_RESPONSE_TO_CYTOKINE_STIMULUS	GOBP_REGULATION_OF_RESPONSE_TO_CYTOKINE_STIMULUS	169	0.342919	1.30731	0.00494507	0.114374	0.0982407	9610	tags=62%, list=52%, signal=30%	NLRP2B/IL36RN/MMP12/IL6/C1QTNF4/TRIM6/IRGM/TNF/PADI2/IL1RN/NOL3/IL1R2/SPHK1/LRRC70/ZBP1/SLIT3/TXK/IRF3/SH2B3/RNASEL/SPATA2/TLR2/ADAM17/MAPK7/PARP9/IRAK3/CARD16/PXDN/NR1H2/SYK/RNF31/ECM1/IRAK1/RBCK1/HSPA1A/HSP90AB1/RUNX1/PYCARD/TREM2/PIAS1/PTPN1/CACTIN/IFNGR2/IRF7/PTPN11/CD74/MED1/ZNF675/STAT1/JAK2/IRAK2/PTPN6/YTHDF3/CASP4/AGPAT2/HPX/OTUD4/PIAS4/CASP8/ABCE1/IL7/PTPRC/IFNAR2/JAK1/TAX1BP1/LAPTM5/IFN…
GOCC_PHAGOCYTIC_VESICLE	GOCC_PHAGOCYTIC_VESICLE	133	0.356647	1.33674	0.00494507	0.114374	0.0982407	9449	tags=60%, list=51%, signal=30%	PGLYRP1/MPO/NOD2/ATP6V0A4/TLR7/IRGM/RAB11FIP1/TCIRG1/HVCN1/BECN1/RILP/INPP5B/ABCA1/NCF2/RAB11FIP5/UNC93B1/HLA-C/CD36/RAB32/TLR2/MYO1C/RAC2/SYK/ATP6V0E2/ATP6V0A1/SNAP23/STX12/UVRAG/VAMP3/ATP6V0C/AMBRA1/CALR/FMNL1/HLA-A/RAB14/LAMP2/SEC22B/SNX3/RAB22A/MPEG1/GNLY/VPS26B/HLA-E/RAB11B/TAP2/HLA-F/PDIA3/ANXA11/STXBP3/ITGB5/PIKFYVE/RAB10/ATP6V0D2/OCRL/RAB31/RAPGEF1/TAP1/APPL1/ATP6V0E1/NOD1/STXBP4/RAB5A/TL…
GOBP_TERMINATION_OF_RNA_POLYMERASE_II_TRANSCRIPTION	GOBP_TERMINATION_OF_RNA_POLYMERASE_II_TRANSCRIPTION	35	0.463708	1.53422	0.00500507	0.114374	0.0982407	6015	tags=54%, list=32%, signal=37%	ZNF473/CSTF1/SYMPK/MED18/CPSF4/CPSF3/FIP1L1/SETX/PCF11/TTF2/NUDT21/SCAF4/CPSF2/NCBP1/LSM10/SNRPF/SNRPG/SNRPB/SSU72
GOBP_MITOCHONDRIAL_GENE_EXPRESSION	GOBP_MITOCHONDRIAL_GENE_EXPRESSION	161	0.342659	1.30105	0.00501943	0.114374	0.0982407	11276	tags=70%, list=60%, signal=28%	MRPS24/MRPL38/TRMT10B/TRMT61B/AARS2/SARS2/MRPL11/MRPS31/HSD17B10/MTERF4/AURKAIP1/MRPL21/MRPL46/MRPL49/MRPS7/TRNT1/MRPS12/RPUSD3/MPV17L2/MRPS27/TRIT1/RCC1L/MRPS18B/PTCD3/NOA1/TFB1M/MRPS21/MRPL48/SHMT2/MRPS17/TFB2M/TACO1/MRRF/MRPL17/MRPL51/GFM1/WARS2/TBRG4/ELAC2/MTIF2/MRPS35/MRPS22/MRPS15/MRPL18/MRPS9/MTERF1/MRPL13/MRPS28/MRPL58/MTRF1/UQCC2/TSFM/MRPL20/MRPL52/TFAM/MTERF2/NGRN/RARS2/FASTKD2/TRMT10C/…
GOBP_MITOTIC_CELL_CYCLE_CHECKPOINT	GOBP_MITOTIC_CELL_CYCLE_CHECKPOINT	157	0.338526	1.28239	0.00501943	0.114374	0.0982407	8033	tags=52%, list=43%, signal=30%	HUS1B/WEE2/TEX14/DUSP1/USP44/BRCA1/MUC1/ORC1/CNOT1/PLK1/RAD9A/CDT1/CRADD/TNKS1BP1/ARID3A/BTG2/ZFYVE19/XPC/E2F4/NAE1/CARM1/SYF2/CDC25C/ZWINT/ZNF385A/EME2/TRIM39/PPP1R10/TAOK3/LCMT1/PRMT1/PLK3/MDM4/VPS4A/MSH2/TPR/IK/NABP2/CDC6/EP300/CNOT6/FAM122A/AURKA/AURKB/STK33/CNOT6L/PSMG2/CNOT4/CENPF/GADD45A/CASP2/DCLRE1B/CHEK1/MAD1L1/FOXO4/PML/PCBP4/RPL26/ANAPC15/ZNF830/CDKN1A/CNOT3/NEK11/ATM/FBXO31/NBN/TTK/K…
GOBP_ESTABLISHMENT_OF_PROTEIN_LOCALIZATION_TO_VACUOLE	GOBP_ESTABLISHMENT_OF_PROTEIN_LOCALIZATION_TO_VACUOLE	48	0.431737	1.48956	0.00502948	0.114374	0.0982407	7663	tags=65%, list=41%, signal=38%	CACNG8/GOSR2/MON1A/AP3D1/MON1B/SMURF1/ZFYVE16/VPS13C/VPS4A/NEDD4/GCC2/AP3M1/VPS37B/LAMP2/AP4M1/NCOA4/VTI1B/NAGPA/AP3B1/VPS13D/VPS37C/VPS37A/M6PR/LAPTM5/SORT1/HGS/SNX16/CLU/GGA3/VPS25/VPS36
GOCC_CLATHRIN_COATED_ENDOCYTIC_VESICLE	GOCC_CLATHRIN_COATED_ENDOCYTIC_VESICLE	55	0.42668	1.4923	0.00502948	0.114374	0.0982407	6630	tags=53%, list=36%, signal=34%	SFTPD/CD207/SFTPA1/APOB/HBEGF/CTLA4/AP2A2/CPNE6/RAB35/CLTB/AP2B1/CLTC/AP2M1/FCGR1B/FZD4/SGIP1/INPP5F/DVL2/AP2S1/HLA-DQA1/CD74/SH3GL2/HLA-DRB1/MYO1E/TBC1D5/HLA-DQB1/FZD5/APOE/SFTPA2
GOBP_VESICLE_BUDDING_FROM_MEMBRANE	GOBP_VESICLE_BUDDING_FROM_MEMBRANE	107	0.367734	1.35368	0.00509379	0.114777	0.098587	9571	tags=66%, list=51%, signal=32%	GRIA1/TRAPPC5/MX2/INSIG1/GOSR2/RILP/TGFA/CHMP7/SEC23B/TRAPPC2/GBF1/DNM1/AP3D1/GORASP1/PPP6R1/TMED10/CHMP5/VPS4A/AP2M1/TRAPPC6A/PEF1/F8/ANXA2/LMAN1/SEC24B/TRAPPC9/SLC2A4/SEC22B/TRAPPC4/FNBP1L/SNX3/GOLGA2/PPP6C/PRKCI/PDCD6/SCFD1/USO1/AP3B1/NSF/TBC1D20/SEC23A/CTSC/CUL3/ANKRD28/GOLPH3/SEC23IP/GOLPH3L/SEC24D/PRKN/PPP6R3/MYO18A/S100A10/F5/CNIH2/SNAP91/COL7A1/SAR1A/ARFGAP3/CD59/SEC16A/TRAPPC3/SEC24A/WAS…
GOBP_STEROL_BIOSYNTHETIC_PROCESS	GOBP_STEROL_BIOSYNTHETIC_PROCESS	71	0.389613	1.3923	0.00509889	0.114777	0.098587	9855	tags=69%, list=53%, signal=33%	APOA5/CYP7A1/HMGCS2/APOB/SEC14L2/CYP51A1/INSIG1/CES1/CFTR/INSIG2/ERLIN2/GPAM/FDPS/SCD/MBTPS1/PMVK/SREBF2/TM7SF2/PRKAA2/NFYB/RAN/HMGCR/G6PD/CYB5R3/KPNB1/MVD/NFYC/SP1/FASN/PRKAG2/NSDHL/ELOVL6/APOE/SOD1/DHCR24/LSS/MBTPS2/CYB5R2/ACACA/ACAA2/FDFT1/HSD17B7/LBR/NFYA/EBP/SCAP/FAXDC2/SC5D/GGPS1
GOMF_AMIDE_TRANSMEMBRANE_TRANSPORTER_ACTIVITY	GOMF_AMIDE_TRANSMEMBRANE_TRANSPORTER_ACTIVITY	54	0.427771	1.49329	0.00509889	0.114777	0.098587	7537	tags=61%, list=40%, signal=37%	SLC38A3/AQP10/SLC15A2/SLC14A1/SLC47A1/ABCA1/AZGP1/DISP1/SEC61A2/CDH17/TOMM20L/SLC5A6/SEC61G/TMED10/SLC13A3/SLC19A1/SEC61A1/SLC33A1/TOMM22/TIMM17B/ABCC1/TOMM70/TAP2/MCL1/TIMM22/SLC25A32/SEC63/GJA1/TOMM40L/SLC27A1/ABCG2/TAP1/TIMM17A
GOBP_REGULATION_OF_ACTIN_FILAMENT_LENGTH	GOBP_REGULATION_OF_ACTIN_FILAMENT_LENGTH	174	0.337028	1.28552	0.00516815	0.115169	0.0989236	8786	tags=56%, list=47%, signal=30%	ARHGAP40/MAGEL2/TMSB15B/CCL26/SPIRE2/PLEKHH2/CARMIL1/PFN4/BAIAP2/CCL24/ADD3/JMY/GMFG/CDC42EP1/TRIOBP/SSH3/PTK2B/FLII/SVIL/BAIAP2L1/CXCL12/FER/RASA1/SSH1/COTL1/SCIN/CAPZB/MYO1C/CFL2/LMOD1/SWAP70/PREX1/HAX1/HIP1R/ESAM/PYCARD/TRIM27/FCHSD2/MTPN/GBA2/GMFB/SNX9/CAPG/CCL21/ARPC4/GRB2/NCKAP1/SPTBN5/TMOD1/ARHGAP18/ARPIN/WASF3/ARPC5L/TWF1/RICTOR/PLEK/NCK2/DLG1/PRKCD/ELN/AP1AR/CYFIP1/ARHGAP35/TMSB4X/ARHGAP…
GOBP_REGULATION_OF_NERVOUS_SYSTEM_DEVELOPMENT	GOBP_REGULATION_OF_NERVOUS_SYSTEM_DEVELOPMENT	404	0.307408	1.20944	0.00516815	0.115169	0.0989236	8653	tags=51%, list=46%, signal=28%	AMIGO3/LRTM2/NCMAP/HAP1/RASSF10/DRAXIN/ITPKA/GRID2/FEZF2/HES2/SLIT1/LTA/ADGRB3/FLRT3/DRD2/DCT/ASCL1/GPR37L1/CHODL/MCF2/IL6/NTN1/ASCL2/LRRN3/DLG5/LINGO1/PLXNA3/MYB/TNF/ISLR2/SYNGAP1/SHH/IL1RAPL1/PAK1/KIT/PRTG/PLAG1/LRP8/SEMA4F/NFATC4/PARP6/TIAM1/FZD3/BMP7/BHLHB9/EPHA4/EPHA7/IST1/SEMA3B/SEMA3F/SMARCD3/NLGN2/PER2/SERPINE2/SEMA4B/REST/ID1/TLR2/CDK5/SIRT2/GORASP1/CXCL12/HEYL/SLC25A12/RGS14/LRP2/SEMA4D…
GOBP_STEM_CELL_DIFFERENTIATION	GOBP_STEM_CELL_DIFFERENTIATION	246	0.322491	1.247	0.00516815	0.115169	0.0989236	10217	tags=61%, list=55%, signal=28%	NRG1/FOXC2/HOXB4/LMO1/TRIM6/MYB/ALDH1A2/OVOL2/SHH/TBX1/MSX1/KIT/SEMA4F/MAPK3/BMP7/ACVR1/PSMB10/SEMA3B/PSMC1/SEMA3F/ESR1/TEAD2/LDB1/LRP6/SEMA4B/CDH2/REST/OSM/SEMA4D/LAMA5/PSMA6/NRP2/WNT3/PSME4/PSME2/YAP1/MLLT3/PRICKLE1/PSMB3/TACSTD2/PWP1/METTL5/PDX1/PEF1/PSME3/SETD2/OCIAD2/HOXA7/RUNX1/ERCC2/PSMC6/GATA1/SOX18/NUDT21/JARID2/NRP1/SOX5/OCIAD1/N4BP2L2/NOLC1/PSMC4/PSMB8/PSMD13/PSMC2/TCF12/PDCD6/PSMD11/T…
GOBP_GLYCOPROTEIN_BIOSYNTHETIC_PROCESS	GOBP_GLYCOPROTEIN_BIOSYNTHETIC_PROCESS	322	0.315822	1.23324	0.00531688	0.118088	0.101431	9582	tags=58%, list=51%, signal=29%	GCNT7/MUC5B/FUT3/CHST9/NDST3/MUC5AC/ST8SIA3/FUT6/MUC4/MUC12/ST8SIA2/GALNT8/MUC3A/CHST8/ABCA7/GAL3ST2/ASGR1/MUCL1/B3GALT2/ACER2/CHST15/SLC51B/AQP11/GALNTL6/B3GALNT2/GALNT15/MUC1/FUT9/B3GALT1/GALNT12/GCNT2/HBEGF/ALG10/GAL3ST4/ST6GALNAC4/B3GNT7/NUDT14/UGGT2/MGAT3/GAL3ST1/ST6GALNAC2/B3GALT4/POFUT2/ACOT8/B4GALT3/CANT1/MPDU1/PMM1/ALG6/B3GNT8/ALG11/DOLPP1/BACE2/ALG3/NCSTN/POMT1/GORASP1/DAD1/CYTL1/MPI/TM…
GOBP_CYTOSOLIC_TRANSPORT	GOBP_CYTOSOLIC_TRANSPORT	156	0.345158	1.30681	0.00539124	0.118554	0.101831	11262	tags=74%, list=60%, signal=30%	MAGEL2/HOOK2/CES1/KLHL20/BECN1/GOSR2/RILP/MAPK3/RBSN/SNX8/AKTIP/CORO7/WDR91/DCTN1/EVI5/YKT6/TBC1D10A/GBF1/SNX12/TANC2/SNX5/VPS13C/GOSR1/MTMR2/VPS52/VPS11/RNF126/STX16/CLTC/KIF5A/BET1L/CHMP3/CCDC91/VPS29/GCC2/TBC1D23/VAMP3/UBE2O/GGA1/TRIM27/RAB14/AP4M1/SNX3/RAB21/ARL1/VTI1B/VPS26B/EHD3/SYT4/RAB6A/AP1AR/USP7/DENND2A/PIKFYVE/PLEKHJ1/MAP2/TBC1D5/KIF1A/LAPTM5/SORT1/PRKN/DNAJC13/SNX16/ANKRD27/VPS35/TME…
GOBP_POSITIVE_REGULATION_OF_CELL_DEVELOPMENT	GOBP_POSITIVE_REGULATION_OF_CELL_DEVELOPMENT	279	0.320087	1.24352	0.00539124	0.118554	0.101831	8653	tags=53%, list=46%, signal=29%	BNC1/HAP1/RASSF10/OLFM4/ITPKA/MPL/LTA/DRD2/DCT/ASCL1/CHODL/IL6/NTN1/PLXNA3/MYB/TNF/ISLR2/SHH/IL1RAPL1/PAK1/KIT/CARMIL1/PLAG1/LRP8/PARP6/TIAM1/FZD3/CLEC7A/BHLHB9/GPR68/EPHA4/IST1/SMARCD3/SERPINE2/TRIOBP/TLR2/P4HB/SIRT2/CXCL12/RGS14/LRP2/SEMA4D/TRPV2/CDH4/PLXND1/GDI1/S1PR2/SPINT1/SRRT/CRKL/TESK1/PRPF19/WNT3/ZNF365/NUMB/SS18L1/EGR2/CDH5/MAP1B/MAPT/DICER1/MME/CUX1/PREX1/EEF2K/CUX2/SERPINF1/LPAR3/CALR…
GOBP_POSITIVE_REGULATION_OF_CYTOSKELETON_ORGANIZATION	GOBP_POSITIVE_REGULATION_OF_CYTOSKELETON_ORGANIZATION	212	0.330731	1.27109	0.00539124	0.118554	0.101831	10851	tags=66%, list=58%, signal=28%	SYNPO2L/MAGEL2/TRPV4/CCL26/NTRK3/TGFB3/PLXNA3/SPIRE2/CENPJ/PAK1/CARMIL1/EPHA1/BCAS3/BAIAP2/FHOD1/CCL24/NES/JMY/ARHGEF10/TEK/DCTN1/TSC1/GMFG/CDC42EP1/PTK2B/ID1/GPSM2/CDK5/BAIAP2L1/SYNPO/FER/DYNC1H1/CCDC88A/SCIN/NUMA1/NUP62/SDC4/TESK1/ARL2/RHOC/NF2/MYO1C/CFL2/LMOD1/MAP1B/SPAG5/SWAP70/MAPT/HSPA1A/HAX1/ITGB1BP1/HIP1R/PYCARD/P2RX7/TRIM27/FCHSD2/GMFB/SNX9/RAC1/CCL21/NRP1/ARPC4/PFDN2/GRB2/NCKAP1/ARPIN/W…
GOBP_CORONARY_VASCULATURE_DEVELOPMENT	GOBP_CORONARY_VASCULATURE_DEVELOPMENT	42	0.448816	1.51865	0.0054292	0.11898	0.102197	8085	tags=69%, list=43%, signal=39%	TBX1/APLNR/SUFU/LRP2/DYNC2H1/PLXND1/AP2B1/SNX17/PRICKLE1/TAB1/SEC24B/SETD2/NDST1/NRP1/GPER1/DCTN5/TGFBR1/SPRED1/ARID2/BMP4/SMAD6/TBX5/SRF/MMP21/VEGFA/VEGFB/TGFBR3/MESP1/PTK7
GOMF_OXYGEN_BINDING	GOMF_OXYGEN_BINDING	35	0.460618	1.52399	0.00545665	0.11898	0.102197	1878	tags=34%, list=10%, signal=31%	CYP2A7/TH/HBQ1/CYP8B1/CYP1A1/CYP3A5/CYP3A7/HBB/HBA2/HBA1/MB/CYP1B1
GOBP_HISTONE_METHYLATION	GOBP_HISTONE_METHYLATION	125	0.354988	1.32413	0.0054656	0.11898	0.102197	8593	tags=56%, list=46%, signal=30%	PRDM16/PAX5/BRCA1/MYB/PRDM5/N6AMT1/EHMT2/KMT5C/PHF19/AASS/ZNF304/WDR61/MECOM/SIRT7/IWS1/FBLL1/CARM1/AUTS2/DOT1L/ARID4A/RIF1/MTHFR/SETD7/SMARCB1/SETD5/PRMT1/BCOR/PYGO2/PWP1/OGT/MEN1/PAF1/KMT2E/SETD2/SMYD2/ZNF335/JARID2/SETD1B/CREBBP/SETD3/MTF2/DPY30/CHTOP/DNMT3B/WDR5/DNMT1/TET3/NELFE/SETD1A/ASH1L/SETDB2/ASH2L/SMAD4/ZNF274/BRD4/CTR9/SNW1/BEND3/PAXIP1/TET2/KDM6A/NTMT1/KMT2D/KMT2B/RNF20/TET1/RLF/PHF1…
GOBP_CELLULAR_MODIFIED_AMINO_ACID_BIOSYNTHETIC_PROCESS	GOBP_CELLULAR_MODIFIED_AMINO_ACID_BIOSYNTHETIC_PROCESS	46	0.435755	1.49566	0.00548203	0.11898	0.102197	8456	tags=65%, list=45%, signal=36%	GGT6/GGT7/TMLHE/MTHFS/CHDH/BBOX1/GATM/GCLC/GART/PLSCR1/CKMT1A/GSS/CNDP2/OPLAH/PARK7/CKMT1B/DHFR/GCH1/NFE2L2/PTDSS1/MTHFD1L/GCLM/HAGH/PTDSS2/SLC27A1/CHAC2/GAMT/ALDH7A1/ATIC/PLOD2
GOBP_ESTABLISHMENT_OR_MAINTENANCE_OF_CELL_POLARITY	GOBP_ESTABLISHMENT_OR_MAINTENANCE_OF_CELL_POLARITY	210	0.330976	1.27114	0.00553996	0.119515	0.102657	11506	tags=73%, list=62%, signal=28%	SFRP5/CRB1/DLG5/ANK1/CD3G/LAMA1/TCIRG1/SHH/CYP26B1/PAK1/RIPOR2/PLK1/BCAS3/PRKCZ/FSCN1/FBF1/RHOH/RHOB/JAM3/PKD1/TEK/DCTN1/RHOBTB1/GBF1/RAB11FIP2/PTK2B/GPSM2/SPINT2/ERBIN/CLASP2/PARD6B/SPRY1/NUMA1/SNX27/CTNNA1/CRKL/RHOC/DST/RAC2/CDH5/MAP1B/RNF41/CENPA/KRIT1/RPGRIP1L/HSP90AB1/PARVB/MAPKAP1/LMNA/FAM89B/RAC1/CCL21/MYH9/MAP4/PDZD11/CAP2/UST/PRKCI/RICTOR/RAC3/ARF4/RND3/DLG1/PDLIM1/CCL4/CYTH3/DOCK8/ARHGA…
GOBP_NEGATIVE_REGULATION_OF_AMYLOID_PRECURSOR_PROTEIN_CATABOLIC_PROCESS	GOBP_NEGATIVE_REGULATION_OF_AMYLOID_PRECURSOR_PROTEIN_CATABOLIC_PROCESS	21	0.526909	1.59394	0.00554973	0.119515	0.102657	6999	tags=67%, list=38%, signal=42%	HAP1/CHRNA7/ABCA7/PIN1/RTN2/SPON1/TMED10/RTN3/RTN1/APOE/BIN1/IGF1/CLU/GGA3
GOBP_REGULATION_OF_SKELETAL_MUSCLE_CONTRACTION	GOBP_REGULATION_OF_SKELETAL_MUSCLE_CONTRACTION	14	0.582241	1.62947	0.00559278	0.119515	0.102657	2021	tags=43%, list=11%, signal=38%	MYH7/SCN4A/CASQ1/GSTM2/ATP2A1/DMPK
GOBP_PROTEIN_DEPHOSPHORYLATION	GOBP_PROTEIN_DEPHOSPHORYLATION	310	0.314916	1.22854	0.00561432	0.119515	0.102657	10406	tags=62%, list=56%, signal=28%	MYH8/PPP1R27/MYH6/PTPRH/DRD2/PPEF1/PTPRU/DUSP1/TNF/SLC39A10/ELFN2/LRRC39/DUSP23/MTMR3/ELFN1/DAPP1/PIN1/CAMK2G/MTM1/DMPK/DLC1/CDC25B/CDCA2/CD33/TSC1/PPP4R4/PTPN18/RCAN3/TNS2/PPP2R2B/SSH3/SBF1/SYMPK/DUSP18/DUSP16/PPP6R1/PTPDC1/CDC25C/DUSP14/ILKAP/MTMR2/DUSP3/SSH1/PPP1R37/EYA3/PPP1R10/PPME1/PTPRA/PPP5C/PPM1H/PPP2CB/PPP1R2/PPP2R2A/PALD1/PPP4R2/CDH5/PPP1R14A/SMPD1/PPP1R1B/MASTL/PPP3CB/SWAP70/PTPRG/PPP…
GOBP_REGULATION_OF_CELL_DEVELOPMENT	GOBP_REGULATION_OF_CELL_DEVELOPMENT	464	0.300994	1.18995	0.00561432	0.119515	0.102657	8877	tags=52%, list=48%, signal=28%	BNC1/HAP1/RASSF10/DRAXIN/OLFM4/ITPKA/MPL/FEZF2/HES2/LTA/WEE2/RFLNA/DRD2/DCT/ASCL1/GPR37L1/CHODL/MCF2/IL6/NTN1/ASCL2/LINGO1/PLXNA3/AXIN2/MYB/TNF/ISLR2/SYNGAP1/SHH/IL1RAPL1/NPR2/PAK1/KIT/LILRB1/PRTG/CARMIL1/PLAG1/LRP8/SEMA4F/NFATC4/PARP6/TIAM1/FZD3/CLEC7A/BMP7/BHLHB9/GPR68/EPHA4/EPHA7/IST1/SEMA3B/SEMA3F/SMARCD3/PER2/SERPINE2/TRIOBP/SEMA4B/REST/ID1/TLR2/CDK5/P4HB/SIRT2/GORASP1/CXCL12/HEYL/RGS14/LRP2…
GOMF_PEPTIDE_BINDING	GOMF_PEPTIDE_BINDING	290	0.319448	1.24284	0.00561432	0.119515	0.102657	8548	tags=52%, list=46%, signal=28%	SCTR/SSTR5/CCKAR/GRIN2B/MCHR1/CRHBP/CHRNA7/GNRHR/CRHR2/CCKBR/NOD2/GRIA1/OPRL1/GPR37L1/GRIN1/ITGA2/ACHE/GSTM2/GRIA3/VIPR2/GPR1/SSTR1/NPR1/NPR2/ERAP2/FOLH1/ADRB2/POM121/LRP8/CABP1/ACVR1/EPHA4/RPS6KB2/LDLRAP1/ANPEP/SEC61A2/VIPR1/TOMM20L/APBB1/AGER/HLA-C/CD36/APBA3/PPIL1/LNPEP/TLR2/CD14/RXRA/GSTM3/CLTB/AP2B1/LDLRAD3/PPIF/AP2M1/PGRMC1/SEC61A1/ECE1/ITM2B/RAMP2/MME/KPNA3/FZD4/ERAP1/GSS/TNPO2/HSP90AB1/SR…
GOBP_CHEMICAL_SYNAPTIC_TRANSMISSION_POSTSYNAPTIC	GOBP_CHEMICAL_SYNAPTIC_TRANSMISSION_POSTSYNAPTIC	99	0.377321	1.38452	0.00568868	0.120329	0.103356	4209	tags=39%, list=23%, signal=31%	CHRNB4/NPY2R/GRIN2B/CHRNB2/IGSF11/CHRNA7/NPAS4/GRID2/DRD4/TRPV1/SHANK1/STX1B/CHRNA3/DRD2/TMEM108/GRIN1/P2RX1/CHRNA6/MPP2/DLG4/GRIK2/ADRB2/CELF4/PRKCZ/ADORA2A/GRIN2D/DMPK/NLGN2/CHRNA10/PTK2B/CDK5/SHANK2/MTMR2/SSH1/S1PR2/SH3GL1/ZMYND8/CUX2/P2RX7
GOBP_METHYLATION	GOBP_METHYLATION	329	0.314828	1.23093	0.00568868	0.120329	0.103356	9858	tags=59%, list=53%, signal=28%	METTL21C/DDX4/MORC1/ZFP57/CYP1A1/BHMT/TDRD12/PRDM16/STPG4/TDRD5/METTL7B/PAX5/PNMT/BRCA1/MYB/HNMT/PRDM5/COQ3/MAT1A/FAM86B1/PCIF1/PRDM1/N6AMT1/EHMT2/BTG2/WT1/KMT5C/FBXO11/PHF19/AASS/TRMT10B/MEPCE/TRMT61B/ZNF304/WDR61/SETD4/MECOM/SIRT7/SMYD5/TDRKH/IWS1/FBLL1/MIS18A/CMTR1/CARM1/ZC3H13/METTL6/INMT/PCMT1/MRM1/AUTS2/ETFBKMT/DOT1L/PRDM2/ARID4A/HSD17B10/TRMO/MTERF4/RIF1/MTHFR/TYMS/NSUN6/SETD7/SMARCB1/SMYD…
GOBP_REGULATION_OF_CELLULAR_AMIDE_METABOLIC_PROCESS	GOBP_REGULATION_OF_CELLULAR_AMIDE_METABOLIC_PROCESS	402	0.305626	1.20206	0.00576304	0.121133	0.104047	10141	tags=60%, list=54%, signal=28%	AIRE/TRIM71/IGF2BP3/HAP1/CHRNA7/NOD2/DDX25/IL6/ABCA7/ITGA2/KRT17/TNF/PASK/SPHK1/CNOT1/PATL2/ERBB2/CPEB1/CELF4/MAPK3/PIN1/PCIF1/NANOS1/FTO/EPHA4/RPS6KB2/ZC3H12D/TARBP2/UNK/RTN2/BTG2/SAMD8/TRNAU1AP/ZFP36L1/CPEB3/TSC1/SPON1/PER2/CDK4/FXR2/PGAM1/PTK2B/ACO1/TMED10/TNRC6B/TNRC6A/ZNF385A/AGO1/EIF4E3/DPH3/UPF1/TYMS/ILF3/EIF4H/LARP4/RPUSD3/GIGYF2/MPV17L2/TPR/METTL5/MRPS27/RCC1L/PTCD3/C8orf88/NEMF/RIDA/SAM…
GOBP_REGULATION_OF_NEUROGENESIS	GOBP_REGULATION_OF_NEUROGENESIS	333	0.312622	1.22238	0.00576304	0.121133	0.104047	8653	tags=51%, list=46%, signal=28%	HAP1/RASSF10/DRAXIN/ITPKA/FEZF2/HES2/LTA/DRD2/DCT/ASCL1/GPR37L1/CHODL/MCF2/IL6/NTN1/ASCL2/LINGO1/PLXNA3/MYB/TNF/ISLR2/SYNGAP1/SHH/IL1RAPL1/PAK1/KIT/PRTG/PLAG1/LRP8/SEMA4F/NFATC4/PARP6/TIAM1/FZD3/BMP7/BHLHB9/EPHA4/EPHA7/IST1/SEMA3B/SEMA3F/SMARCD3/PER2/SERPINE2/SEMA4B/REST/ID1/TLR2/CDK5/SIRT2/GORASP1/CXCL12/HEYL/RGS14/LRP2/SEMA4D/DAAM2/TRPV2/TMEM98/CDH4/PSEN1/PLXND1/GDI1/SPINT1/SRRT/CTNNA1/RYK/PRPF…
GOBP_VIRAL_GENOME_REPLICATION	GOBP_VIRAL_GENOME_REPLICATION	120	0.359493	1.33923	0.0058374	0.12231	0.105058	9314	tags=61%, list=50%, signal=31%	SLPI/TRIM6/CCL8/TNF/OAS1/IFIT1/APOBEC3C/ATG16L2/TARBP2/RNASEL/PPARA/IFIT5/ZC3HAV1/ATG16L1/ZBED1/DDB1/SMARCB1/ILF3/IFI27/PLSCR1/NFIA/GRK2/CCL2/LARP1/DDX3X/ISG20/PPIH/SRPK1/PPIB/VCP/PCBP2/STOM/EIF2AK4/APOBEC3A/PPIE/PDE12/IFITM2/TBC1D20/NR5A2/TRIM28/OAS2/SRPK2/YTHDC2/PPID/PKN2/CTBP2/HACD3/PRKN/LAMTOR5/PABPC1/INPP5K/RAD23A/MPHOSPH8/PPIA/PHB/HTATSF1/TMEM39A/EIF2AK2/PARP10/IFI16/STAU1/CD209/RAB5A/TOP2B…
GOCC_MALE_GERM_CELL_NUCLEUS	GOCC_MALE_GERM_CELL_NUCLEUS	10	0.643284	1.66683	0.0059163	0.123575	0.106144	4594	tags=60%, list=25%, signal=45%	MORC1/REC8/MLH1/MLH3/TERF2/TCFL5
GOBP_LYSOSOMAL_TRANSPORT	GOBP_LYSOSOMAL_TRANSPORT	107	0.365137	1.34412	0.00598612	0.124642	0.107061	8828	tags=60%, list=47%, signal=32%	CACNG8/PCDHGA3/HOOK2/VPS18/RILP/ADRB2/CLEC16A/RBSN/MTM1/AKTIP/RHOB/VIPAS39/VPS39/AP3D1/UBXN6/ZFYVE16/VPS52/VPS33A/VPS11/SNX27/CHMP5/DENND3/VPS4A/CHMP3/CCDC91/NEDD4/GCC2/HSPA1A/AP3M1/TSG101/LAMP2/AP4M1/VCP/RAB12/HGSNAT/SPTBN5/NCOA4/EHD3/NAGPA/AP3B1/MGRN1/M6PR/LAPTM5/SORT1/PRKN/HGS/SNX16/BIN1/VPS35/TMEM106B/GRN/CLU/GGA3/VPS53/VPS16/VPS54/LYST/STX8/VAMP7/RAB7B/HOOK3/SCARB2/C9orf72/ALS2
GOBP_MITOTIC_NUCLEAR_DIVISION	GOBP_MITOTIC_NUCLEAR_DIVISION	285	0.318123	1.23722	0.00606048	0.125407	0.107718	9892	tags=60%, list=53%, signal=29%	IL1A/TEX14/DUSP1/USP44/CCDC8/SPHK1/HOXA13/PKMYT1/TTN/BECN1/PLK1/CDT1/TGFA/CDCA5/UBE2S/PIN1/BMP7/CUL9/REC8/CENPC/CEP85/ARHGEF10/CHMP7/CEP192/NCAPH/SIRT7/FBXW5/MAU2/SIRT2/HECW2/DIS3L2/PDGFB/CDC25C/ANAPC1/ZWINT/CLASP2/SMC2/NAA10/AURKAIP1/CDC26/AURKC/NEK2/TACC3/NUMA1/NUP62/CHMP5/INO80/RIOK2/ANAPC11/STAG1/LCMT1/PPP2R2A/NIPBL/VPS4A/RAN/NCAPH2/TPR/IK/PRC1/SPAG5/HSPA1A/CDC6/NCAPD2/PIBF1/AURKA/CCNB2/AURKB…
GOMF_SNARE_BINDING	GOMF_SNARE_BINDING	111	0.366847	1.35567	0.00606048	0.125407	0.107718	9046	tags=56%, list=49%, signal=29%	SYT10/SYT2/STX1B/SNCA/VPS18/GOSR2/ABCA1/SYP/SYT17/STXBP5L/TNFAIP2/VPS50/STXBP2/TMED10/VPS52/VPS11/STX16/BLOC1S6/TXLNA/SNAP23/STX12/UVRAG/SEC24B/VAMP3/SYBU/SEC22B/GOLGA2/TXLNB/VTI1B/RAB4A/SYT4/SNAP29/SCFD1/TSNARE1/STX17/RNF40/NSF/STXBP3/STX2/SYPL1/DAPK1/SEC24D/CAPN10/ANKRD27/TRIM9/SYT15/EXOC3/SNAP91/PRRT2/STXBP4/SCFD2/EXOC3L1/UNC13A/UNC13B/SEC24A/VPS54/SYT7/STX8/SYT9/VAMP7/STX11/VAMP2
GOBP_AMYLOID_BETA_METABOLIC_PROCESS	GOBP_AMYLOID_BETA_METABOLIC_PROCESS	53	0.421115	1.46649	0.00614098	0.126679	0.108811	7198	tags=57%, list=39%, signal=35%	NAT8/HAP1/CHRNA7/ABCA7/TNF/BECN1/PIN1/MGAT3/EPHA4/RTN2/SPON1/BACE2/NCSTN/TMED10/PSEN1/MME/ADAM10/APH1A/RTN3/DYRK1A/RTN1/SP1/RELA/IFNGR1/APOE/BIN1/IGF1/CLU/GGA3/BACE1
GOCC_NUCLEOTIDE_EXCISION_REPAIR_COMPLEX	GOCC_NUCLEOTIDE_EXCISION_REPAIR_COMPLEX	12	0.626594	1.68781	0.00620302	0.126908	0.109007	4757	tags=42%, list=26%, signal=31%	POLD1/XPC/ERCC4/ERCC1/CETN2
GOBP_MICROTUBULE_CYTOSKELETON_ORGANIZATION_INVOLVED_IN_MITOSIS	GOBP_MICROTUBULE_CYTOSKELETON_ORGANIZATION_INVOLVED_IN_MITOSIS	139	0.348999	1.31265	0.0062092	0.126908	0.109007	10903	tags=68%, list=58%, signal=29%	FSD1/PLK1/PKD1/ARHGEF10/DCTN1/CEP192/CEP126/GPSM2/DYNC1H1/CLASP2/SPRY1/AURKC/NEK2/TACC3/NUMA1/NUP62/CHMP5/CLTC/STAG1/RAN/TPR/TACC1/PRC1/HSPA1A/CENPA/SETD2/SPC25/PIBF1/AURKA/AURKB/SMC3/SBDS/GOLGA2/MAP4/VCP/CHMP1B/STMN1/KPNB1/MAP9/KIFC1/EFHC2/TOGARAM2/TOGARAM1/WRAP73/CCSAP/GJA1/NDE1/TTK/HNRNPU/NUDC/CHEK2/STIL/CCDC61/FBXW11/BCCIP/MAD2L1/RMDN1/TBCE/LSM14A/TACC2/CLASP1/CKAP5/RAE1/SPDL1/PKHD1/MYBL2/HSP…
GOMF_HELICASE_ACTIVITY	GOMF_HELICASE_ACTIVITY	152	0.345161	1.30609	0.0062092	0.126908	0.109007	9880	tags=62%, list=53%, signal=30%	DDX4/DQX1/TDRD12/DDX25/DDX47/DHX58/RTEL1/DDX11/CHD9/DHX38/RECQL5/HELB/DDX60L/DDX31/MCM8/DHX30/FANCM/CHD3/DHX37/CHD8/DDX52/DDX24/BRIP1/UPF1/DDX3Y/INO80/GTF2F2/DDX18/SETX/RFC3/RUVBL2/DHX32/DICER1/SMARCA1/DDX20/DDX46/DDX3X/XRCC6/SRCAP/ERCC2/G3BP1/TTF2/DDX50/ERCC6L2/HLTF/ZNFX1/WRNIP1/YTHDC2/MCM4/CHTF18/CHD2/DDX59/DDX19A/HELZ/MCM9/DDX23/DDX28/RAD50/DDX6/DDX39B/DDX60/RAD54B/SUPV3L1/MCM5/SNRNP200/DDX39A…
GOBP_PROTEIN_TARGETING_TO_LYSOSOME	GOBP_PROTEIN_TARGETING_TO_LYSOSOME	22	0.521516	1.59312	0.00626062	0.127567	0.109573	6999	tags=77%, list=38%, signal=48%	ZFYVE16/VPS4A/NEDD4/GCC2/AP3M1/LAMP2/AP4M1/NCOA4/NAGPA/AP3B1/M6PR/LAPTM5/SORT1/HGS/SNX16/CLU/GGA3
GOCC_CLATHRIN_COAT	GOCC_CLATHRIN_COAT	44	0.443908	1.51147	0.00630878	0.128063	0.109999	6459	tags=55%, list=35%, signal=36%	ENTHD1/SYNRG/AP1G2/AP4B1/AP1M1/AP2A2/AP1S1/AP3M2/AP1B1/EPN1/CLTB/VPS33A/AP2B1/CLTC/AP2M1/SGIP1/AP3M1/AP2S1/AP4M1/SYNJ1/AP1M2/AP3B1/TBC1D5/NCALD
GOMF_PROTEIN_TRANSPORTER_ACTIVITY	GOMF_PROTEIN_TRANSPORTER_ACTIVITY	29	0.481555	1.54495	0.00635523	0.128063	0.109999	6640	tags=66%, list=36%, signal=42%	GPIHBP1/ABCA1/AZGP1/SEC61A2/TOMM20L/SEC61G/LRP2/TMED10/SEC61A1/TIMM10B/TOMM22/TIMM17B/TOMM70/TIMM8B/MCL1/TIMM22/SEC63/IGF1R/TOMM40L
GOBP_POSITIVE_REGULATION_OF_RESPONSE_TO_BIOTIC_STIMULUS	GOBP_POSITIVE_REGULATION_OF_RESPONSE_TO_BIOTIC_STIMULUS	239	0.321417	1.24172	0.00635793	0.128063	0.109999	8287	tags=53%, list=44%, signal=30%	KLK7/MUC5B/SLC22A13/MUC5AC/MUC4/NOD2/MUC12/MMP12/MUC3A/MUCL1/TRIM6/DHX58/LAG3/IRGM/MUC1/MNDA/RASGRP1/PAK1/CD274/NMI/ZBP1/TXK/IFI35/IRF3/COCH/CLEC10A/PSMB10/PSMC1/STAT5B/POLR3B/NCR3/POLR3F/NRAS/CD226/HEXIM1/PARP9/PLCG2/ICAM2/PSMA6/PSME4/FYN/PSME2/TAB3/PSPC1/SYK/PSMB3/PLSCR1/TAB1/PSME3/SKP1/EP300/PYCARD/XRCC6/PSMC6/FCER1G/POLR3G/MALT1/LY96/SASH1/CD1D/IRF7/HMGB2/TOMM70/LBP/PSMC4/PSMB8/MED1/HLA-E/PSM…
GOBP_SPHINGOMYELIN_METABOLIC_PROCESS	GOBP_SPHINGOMYELIN_METABOLIC_PROCESS	14	0.575747	1.61129	0.00639748	0.128063	0.109999	7482	tags=71%, list=40%, signal=43%	SAMD8/SGMS1/SMPDL3B/SMPD1/SGMS2/PRKCD/ABCA8/PEMT/ORMDL3/SPTLC2
GOBP_COLLAGEN_METABOLIC_PROCESS	GOBP_COLLAGEN_METABOLIC_PROCESS	101	0.372576	1.36993	0.00643229	0.128063	0.109999	6318	tags=44%, list=34%, signal=29%	PRSS2/MMP20/MMP13/COL19A1/MMP26/MMP1/CYP7A1/TMPRSS6/MMP12/IL6/MMP28/ITGA2/MMP17/TGFB3/MYB/MMP23B/P3H3/TRAM2/VIPAS39/VSIR/CBX8/TNS2/MMP10/ENG/MMP7/P3H1/P3H2/EMILIN1/P3H4/GOT1/RUNX1/SERPINH1/PPARD/RCN3/HDAC2/MMP19/COL1A1/COL15A1/COL1A2/CTSL/FAP/MMP2/SUCO/SERPINF2
GOBP_POSITIVE_REGULATION_OF_CYTOKINE_PRODUCTION	GOBP_POSITIVE_REGULATION_OF_CYTOKINE_PRODUCTION	409	0.302266	1.18999	0.00643229	0.128063	0.109999	9380	tags=56%, list=50%, signal=28%	ORM1/ORM2/IL1A/IL1RL2/NOD2/LTA/DEFB124/EPX/FFAR3/DRD2/MMP12/IL6/NLRP12/IL23A/AZU1/C1QTNF4/CCR2/PRKCQ/NLRP3/TRIM6/DHX58/LPL/TLR7/BRCA1/MYB/IRF5/TNF/MNDA/SPHK1/RASGRP1/AFAP1L2/IRF8/CD274/LILRB1/C1QTNF3/HHLA2/ZBP1/LILRA5/NFATC4/HK1/PRKCZ/TXK/LY9/CLEC7A/CYP1B1/IRF3/TLR3/ZNF580/STAT5B/TIRAP/LGALS9/TLR5/POLR3B/ARFGEF2/IL4R/RARA/CCDC88B/AGER/GPSM3/POLR3F/CD36/OSM/CD226/IL6R/TLR2/CD14/ADAM17/IL17RC/PRKD2…
GOMF_PROTEIN_C_TERMINUS_BINDING	GOMF_PROTEIN_C_TERMINUS_BINDING	182	0.338499	1.29313	0.00643229	0.128063	0.109999	10903	tags=71%, list=58%, signal=30%	MCHR1/RBFOX1/SH3GL3/SHANK1/DLG4/LAMA1/KSR1/ERBB2/FIGN/SDCBP2/BAIAP2/NCF2/CALCOCO1/SREBF2/PTK2B/ID1/GPSM2/CNRIP1/POLR2A/TERF2/SNX17/NUMA1/SDC1/TESK1/MID1IP1/AFDN/PPP2CB/SH3GL1/MYO1C/TBL1X/YAP1/DST/NIPBL/VPS4A/CD2AP/MSH2/ECM1/ERCC4/KPNA3/ERCC1/ATP1B1/EP300/YEATS4/XRCC6/ERCC2/PPP1CC/PIAS1/EML2/PEX12/SCAF4/SASH1/LCK/SPTBN5/YWHAB/CENPF/PEX6/PIAS3/ITGB3BP/PRDX3/SH3GL2/JAK2/FBLN5/DLG1/TRIM3/RABAC1/USP7/…
GOBP_CYTOPLASMIC_MICROTUBULE_ORGANIZATION	GOBP_CYTOPLASMIC_MICROTUBULE_ORGANIZATION	62	0.400553	1.41876	0.00643872	0.128063	0.109999	8055	tags=61%, list=43%, signal=35%	FIGNL2/TRPV4/FSD1/CCDC13/HOOK2/CENPJ/FIGN/CLIP2/TUBGCP2/CLIP4/KATNAL2/DCTN1/CCDC88B/CEP126/FIGNL1/DYNC1H1/CCDC88A/NUMA1/DST/PLK3/CHP1/MAPT/KPNB1/KATNAL1/DLG1/SLK/WDR73/TPPP/TUBGCP5/TUBGCP4/CEP120/STMN3/KATNA1/CRIPT/CCDC88C/TRDN/CLASP1/CIB1
GOBP_RESPONSE_TO_HEAT	GOBP_RESPONSE_TO_HEAT	155	0.346745	1.31235	0.00650665	0.129029	0.110829	9873	tags=63%, list=53%, signal=30%	PKLR/IL1A/NOS1/TRPV1/CASQ1/TRPV4/ASIC3/HSPA1L/POM121/MICB/STAC/MAPK3/NUP210/CAMK2G/ABCC2/ANO1/MAP2K7/NOS3/CD14/DNAJB1/CXCL12/NUP133/TRPV2/NUP62/GCLC/TPR/IRAK1/MAPT/HSPA1A/HSP90AB1/EP300/ATXN3/NUP50/DNAJA2/HTRA2/SLC52A3/VCP/RBBP7/HDAC2/NUP214/HIKESHI/PDCD6/DNAJB4/NUP37/MAPKAPK2/CREBBP/MICA/NDC1/SEH1L/DNAJA4/NUP188/CDKN1A/NUP35/CAMK2D/CXCL10/LYN/ATM/DNAJC2/SOD1/IGF1/DNAJB6/YWHAE/RPA3/CD34/CPB2/EIF2…
GOBP_RECEPTOR_METABOLIC_PROCESS	GOBP_RECEPTOR_METABOLIC_PROCESS	161	0.339906	1.29059	0.00665537	0.131159	0.112658	8595	tags=53%, list=46%, signal=29%	HTR1B/CXCR1/CACNG8/DRD4/GRIA1/DRD2/SNCA/CXCR2/ACHE/DLG4/TFRC/MX2/BECN1/LILRB1/ARR3/LGMN/LDLRAP1/GRK4/CAPN1/AP2A2/ARFGEF2/ANKRD13D/ARC/DNM1/CD36/ARRB1/CDK5/SMURF1/MTMR2/PLCG2/PSEN1/AP2B1/CHMP5/CLTC/WDR54/NUMB/SYK/AP2M1/NEDD4/ECE1/VLDLR/RAMP2/GRK2/ANXA2/UVRAG/VAMP3/INPP5F/CEACAM1/USP46/AP2S1/FCER1G/LAMTOR1/PTPN1/GRB2/SH3GLB1/EHD3/ANKRD13B/LRRTM2/RAB11B/GRK3/AP1AR/ATXN2/NSF/HTR2B/PLEKHJ1/SDCBP/TBC1D…
GOBP_CELLULAR_RESPONSE_TO_PH	GOBP_CELLULAR_RESPONSE_TO_PH	21	0.517284	1.56482	0.00671399	0.131159	0.112658	5270	tags=57%, list=28%, signal=41%	SLC38A3/TRPV1/AQP10/GPLD1/HVCN1/ASIC1/GNA11/GPR68/RAB11FIP5/CHP1/PKD1L3/RAB11B
GOBP_HEMATOPOIETIC_PROGENITOR_CELL_DIFFERENTIATION	GOBP_HEMATOPOIETIC_PROGENITOR_CELL_DIFFERENTIATION	158	0.341679	1.29526	0.00672973	0.131159	0.112658	9380	tags=60%, list=50%, signal=30%	HOXB4/LMO1/MYB/SLC7A6OS/SHH/KIT/ZNF784/JAM3/PSMB10/PSMC1/LDB1/FNIP1/FST/OSM/ZFAT/TMEM190/PSEN1/PSMA6/CSF1R/PSME4/PSME2/YAP1/MLLT3/PSMB3/PSME3/OCIAD2/RUNX1/SOS1/ERCC2/PSMC6/GATA1/SBDS/NUDT21/OCIAD1/N4BP2L2/AGPAT5/PSMC4/PSMB8/PLEK/PSMD13/PSMC2/TCF12/PTPN6/PYGO1/PSMD11/AP3B1/PSMD3/PSMB7/SPI1/ARMC6/PSMA2/NFE2L2/PTPRC/PSMB1/SIPA1L3/PSMB2/C12orf29/SETD1A/PSMB9/BATF/INHBA/PSMD5/TCF3/BMP4/METTL3/PSMC5/PS…
GOMF_UBIQUITIN_LIKE_PROTEIN_LIGASE_BINDING	GOMF_UBIQUITIN_LIKE_PROTEIN_LIGASE_BINDING	301	0.313727	1.22253	0.00672973	0.131159	0.112658	11081	tags=66%, list=59%, signal=27%	ARRDC5/KCNH2/USP2/MAP1LC3B2/SNCAIP/AXIN2/BRCA1/GRIK2/BECN1/ANKRA2/TRIB2/HSPA1L/ERLIN2/STAT2/CUL9/HERC2/APBB1/TRIOBP/MAP1LC3C/PTK2B/KDM4A/ARRB1/NAE1/CACUL1/POLR2A/PARP9/RALB/RAD18/FAF1/TNFRSF14/ARRDC1/GABARAPL1/RNF31/HM13/EGR2/FAF2/FBXO7/UBE2A/FZD4/HSPA1A/ATP6V0C/HSP90AB1/EGFR/ATXN3/AMBRA1/CALR/AURKA/TSG101/RALA/SNX9/FANCL/PIAS1/RNF34/LAPTM4B/VCP/PCBP2/GPI/DBT/HLTF/UBE2G1/NEDD8/ARIH1/TNFRSF1B/RRAG…
GOCC_H3_HISTONE_ACETYLTRANSFERASE_COMPLEX	GOCC_H3_HISTONE_ACETYLTRANSFERASE_COMPLEX	10	0.634746	1.6447	0.00675548	0.131159	0.112658	5957	tags=60%, list=32%, signal=41%	KAT6A/BRPF1/BRD1/ING5/MEAF6/KAT7
GOBP_CELL_CHEMOTAXIS	GOBP_CELL_CHEMOTAXIS	288	0.316599	1.23164	0.00680409	0.131159	0.112658	9143	tags=55%, list=49%, signal=28%	CXCR5/CXCR1/CCR9/C10orf99/S100A14/S100A7/SFTPD/CXCL5/NOD2/DEFB124/CCL23/S100A9/CXCR2/C5AR2/IL6/IL23A/AZU1/CCR2/EDN2/MMP28/PRKCQ/CCL26/DUSP1/CCL8/DPP4/PADI2/CXCL2/MPP1/CCL22/NBL1/PIK3CD/RIPOR2/KIT/HBEGF/TIAM1/MAPK3/LGMN/SLC12A2/CCL25/CCL24/JAM3/ZNF580/TIRAP/LGALS9/GBF1/CXCR3/GPSM3/PTK2B/CCR4/IL6R/CREB3/ADAM17/CXCL12/PDGFB/IL17RC/PRKD2/DOCK4/OXSR1/CRKL/CSF1R/HSD3B7/RAC2/WNK1/SYK/SWAP70/CCL2/ADAM10/…
GOCC_SITE_OF_POLARIZED_GROWTH	GOCC_SITE_OF_POLARIZED_GROWTH	182	0.337897	1.29083	0.00680409	0.131159	0.112658	10943	tags=71%, list=59%, signal=30%	LRRTM1/GRM6/HAP1/ELAVL4/ERC2/FRMD7/NGEF/PCDHGB1/FLRT3/SNCA/ATCAY/TRPV4/TENM2/GPRIN1/PCDH9/ADGRL1/ZNF804A/CRMP1/TIAM1/ADCY10/INPP5J/FSCN1/TSHZ3/ACAP3/EPHA4/GAP43/COBL/KIF5C/CCDC120/TSC1/FXR2/FKBP15/PTCH1/APBB1/EXOC4/PTK2B/CNR1/CDK5/SIRT2/SHANK2/AUTS2/TRPV2/MAPK8IP1/PSEN1/SSH1/USP9X/WHRN/AMFR/SIGMAR1/SETX/MAP1B/MAPT/PALLD/CTNND1/DICER1/PREX1/HSP90AB1/TIMP2/FRYL/RTN4R/HNRNPR/ABI1/NRP1/EXOC6/RAC3/ORA…
GOMF_PHOSPHATASE_ACTIVITY	GOMF_PHOSPHATASE_ACTIVITY	258	0.322203	1.24858	0.00680409	0.131159	0.112658	10920	tags=67%, list=59%, signal=28%	MYH8/PLPPR3/MYH6/NT5DC4/CA3/PON3/PTPRH/PPEF1/PTPRU/ACP7/DUSP1/PLPP7/LRRC39/DUSP23/ACP5/MTMR3/FBP2/LPIN3/INPP5B/INPP5J/MTMR10/CAMK2G/MTM1/NT5C/CDC25B/PTPN18/TNS2/SSH3/SBF1/DUSP18/PLPP3/DUSP16/INPP5D/PTPDC1/CDC25C/DUSP14/ILKAP/MTMR2/DUSP3/SSH1/EYA3/PTPRA/FBP1/PPP5C/PPM1H/PPP2CB/SGPP1/PALD1/FRA10AC1/INPP5A/MTMR11/PPP3CB/PTPRG/CDC25A/PPP4C/PPTC7/INPP5F/MTMR9/PTPN5/DUSP19/PTPN21/PPP1CC/CTDNEP1/ACP1/PT…
GOMF_PHOSPHORIC_ESTER_HYDROLASE_ACTIVITY	GOMF_PHOSPHORIC_ESTER_HYDROLASE_ACTIVITY	348	0.311159	1.21951	0.00680409	0.131159	0.112658	10791	tags=64%, list=58%, signal=28%	MYH8/PLPPR3/MYH6/NT5DC4/CA3/PON3/PTPRH/NOTUM/PPEF1/PTPRU/ACP7/GPLD1/DUSP1/PLCD1/PDE7B/PLPP7/PDE4C/BDKRB2/LRRC39/DUSP23/ACP5/MTMR3/FBP2/LPIN3/INPP5B/PLCXD3/PLCB4/PLCD3/INPP5J/MTMR10/CAMK2G/MTM1/NT5C/CDC25B/GDPD1/CNP/PTPN18/TNS2/PLCXD1/PLCD4/SSH3/SBF1/DUSP18/PLPP3/DUSP16/INPP5D/PTPDC1/CDC25C/DUSP14/ILKAP/MTMR2/PLCG2/DUSP3/SMPDL3B/SSH1/EYA3/PTPRA/FBP1/PPP5C/PPM1H/PPP2CB/SGPP1/PALD1/FRA10AC1/INPP5A/S…
GOBP_POSITIVE_REGULATION_OF_SMOOTH_MUSCLE_CELL_PROLIFERATION	GOBP_POSITIVE_REGULATION_OF_SMOOTH_MUSCLE_CELL_PROLIFERATION	80	0.386153	1.39183	0.0068109	0.131159	0.112658	9083	tags=61%, list=49%, signal=32%	HTR1B/FGF9/IL6/ITGA2/MYB/TNF/PAK1/HBEGF/LDLRAP1/ID2/IL6R/MEF2D/PDGFB/NQO2/HDAC4/IL13/IRAK1/ERN1/GNAI3/EGFR/FOXP1/STAT1/JAK2/PTAFR/TGM2/MAP3K5/MMP2/BMPR1A/DNMT1/SERPINF2/ABCC4/GJA1/CALCRL/IGF1/CX3CL1/BMP4/PDGFD/DDX39B/PHB/MYD88/HES5/FGF2/AKR1B1/S1PR1/RPS6KB1/IRAK4/PPARGC1A/HMOX1/AKT1
GOBP_POSITIVE_REGULATION_OF_SODIUM_ION_TRANSMEMBRANE_TRANSPORT	GOBP_POSITIVE_REGULATION_OF_SODIUM_ION_TRANSMEMBRANE_TRANSPORT	21	0.515641	1.55985	0.00686923	0.131901	0.113296	5441	tags=52%, list=29%, signal=37%	NOS1/DRD4/WNK4/TESC/ATP1B2/GLRX/WNK1/CHP1/ATP1B1/DMD/ATP1B3
GOBP_EXTRACELLULAR_MATRIX_DISASSEMBLY	GOBP_EXTRACELLULAR_MATRIX_DISASSEMBLY	78	0.387033	1.39398	0.00695281	0.133122	0.114345	6138	tags=44%, list=33%, signal=29%	PRSS2/MMP20/CAPNS2/KLK7/MMP13/CTRB1/MMP1/TMPRSS6/MMP12/IL6/DPP4/SCUBE1/FSCN1/DDR2/LCP1/CAPN1/MMP10/MMP7/CLASP2/TPSAB1/KLK2/ADAM10/TIMP2/MELTF/ETS1/MMP19/CAPNS1/CTSL/FAP/EXOC8/MMP2/FGFR4/TLL2/CTSG
GOBP_NEUROTRANSMITTER_BIOSYNTHETIC_PROCESS	GOBP_NEUROTRANSMITTER_BIOSYNTHETIC_PROCESS	16	0.578756	1.659	0.00702302	0.134081	0.115169	1556	tags=38%, list=8%, signal=34%	SLC5A7/TH/NOS1/DBH/ACHE/DAGLB
GOMF_IONOTROPIC_GLUTAMATE_RECEPTOR_ACTIVITY	GOMF_IONOTROPIC_GLUTAMATE_RECEPTOR_ACTIVITY	19	0.529358	1.57065	0.00706128	0.134306	0.115362	2707	tags=42%, list=15%, signal=36%	GRIN2B/GRID2/GRIA1/GRIN1/GRIA3/GRIK2/GRIN2D/PTK2B
GOBP_NEGATIVE_REGULATION_OF_NEURON_DEATH	GOBP_NEGATIVE_REGULATION_OF_NEURON_DEATH	185	0.327308	1.25173	0.00710154	0.134306	0.115362	9935	tags=61%, list=53%, signal=29%	NTF4/SLC30A10/FOXB1/DRAXIN/SNCA/CD200R1/TGFB3/SYNGAP1/TFAP2B/GRIK2/NFATC4/ADORA2A/NMNAT1/PIN1/LGMN/BHLHB9/EN1/EPO/NES/PSMC1/BTG2/GABRB2/TSC1/PPARA/PARP2/REST/PTK2B/ARRB1/CDK5/RASA1/PSEN1/AP2B1/PPP5C/SLC23A2/FYN/IL13/INPP5A/MSH2/FBXO7/CREB1/CCL2/HIPK2/HSP90AB1/SERPINF1/AMBRA1/HTRA2/SOD2/MAP2K4/XRCC2/PARK7/BDNF/EIF4G1/FAIM2/PRKCI/TNFRSF1B/SIX4/JAK2/RETREG1/GBE1/HLA-F/KRAS/C5AR1/KIF14/NGF/TMEM259/OX…
GOMF_OXIDOREDUCTASE_ACTIVITY_ACTING_ON_THE_CH_CH_GROUP_OF_DONORS	GOMF_OXIDOREDUCTASE_ACTIVITY_ACTING_ON_THE_CH_CH_GROUP_OF_DONORS	59	0.403871	1.42394	0.00711575	0.134306	0.115362	9257	tags=63%, list=50%, signal=32%	ACAD11/CRAT/ACOX3/SRD5A1/ACADL/ACADVL/TBXAS1/TM7SF2/AKR1D1/AKR1C2/DHODH/PTGR2/SDHAF4/SRD5A3/IVD/ACAD9/ZADH2/DUS2/FASN/RSAD1/AKR1C3/PTGR1/DHCR24/ACADS/ACOX1/TECR/SDHA/DECR1/DUS4L/SRD5A2/DPYD/CPOX/LBR/SDHB/PPOX/ACAD10/DUS1L
GOBP_HYDROGEN_PEROXIDE_CATABOLIC_PROCESS	GOBP_HYDROGEN_PEROXIDE_CATABOLIC_PROCESS	28	0.493121	1.57104	0.00711633	0.134306	0.115362	5124	tags=50%, list=27%, signal=36%	MPO/HBQ1/DUOX2/EPX/SNCA/DUOX1/HBB/HBA2/HBA1/PXDN/GPX1/NNT/PRDX1/PRDX3
GOBP_ESTABLISHMENT_OF_PROTEIN_LOCALIZATION_TO_MEMBRANE	GOBP_ESTABLISHMENT_OF_PROTEIN_LOCALIZATION_TO_MEMBRANE	335	0.31008	1.21289	0.0071759	0.134306	0.115362	10506	tags=64%, list=56%, signal=29%	STX1B/GRIP2/PDZK1/AMN/SLC51B/AQP11/ZDHHC15/BBS2/GET4/RTP4/PAK1/BBS1/ERBB2/CHM/EMC8/ZDHHC24/TRAM2/EMC1/SEC61A2/RILPL1/PKDCC/EXOC4/RPL21/CDK5/GORASP1/VAMP5/SEC61G/ZDHHC23/FIS1/CNST/GOPC/BBC3/GDI1/MIEF2/SIL1/AFDN/TRAM1L1/FYN/MYO1C/EMC7/GOLGA7/RPS10/SEC61A1/ARL6/CHP1/EMC3/PPP1R13B/TIMM10B/ITGB1BP1/VAMP3/ATP1B1/GGA1/EGFR/ZDHHC22/ZDHHC6/SRP54/ZDHHC21/TOMM22/VPS37B/COX18/GZMB/PEX19/TCAF1/RPS12/STOM/RPL3…
GOBP_GLYCEROPHOSPHOLIPID_METABOLIC_PROCESS	GOBP_GLYCEROPHOSPHOLIPID_METABOLIC_PROCESS	328	0.310558	1.2139	0.0071759	0.134306	0.115362	10867	tags=65%, list=58%, signal=28%	APOA5/PLA2G2F/GPD1/PLA2G4D/ITPKA/PLA2G10/PIP5KL1/ACHE/LCAT/BMX/GPLD1/GPAT3/MBOAT1/PLCD1/ABHD8/LPCAT4/PLA2G15/PIGO/PLB1/MTMR3/PIK3CD/LPIN3/THEM5/CISH/ABHD6/INPP5B/CETP/GPAM/STARD10/VAC14/DGKE/DGKA/PNPLA6/AJUBA/MFSD2A/INPP5J/MTMR10/MTM1/TAZ/ABHD16A/PIGG/GDPD1/TTC7A/CPNE6/CHKB/PI4KB/PIGL/PIGF/SOCS7/PLCD4/DGKG/PCYT1A/SLC44A3/PIGV/DGKZ/SBF1/INPP5D/PDGFB/RUFY1/PLEKHA8/MTMR2/PLCG2/PLA2G6/CHKA/CDS1/PIK3R…
GOBP_REGULATION_OF_INTRACELLULAR_TRANSPORT	GOBP_REGULATION_OF_INTRACELLULAR_TRANSPORT	335	0.310015	1.21263	0.0071759	0.134306	0.115362	9965	tags=59%, list=53%, signal=28%	CHP2/MYLK2/HAP1/PDZK1/SLC51B/CAMK1/ATP2A1/MX2/CEP131/SHH/INSIG1/NDRG4/GAS1/PAK1/ERBB2/HSPA1L/BCAS3/MAPK3/CABP1/LDLRAP1/LCP1/SP100/NUCB1/ABLIM3/SUFU/HUWE1/SIRT7/HDAC3/IWS1/SREBF2/CD36/CDK5/SNX12/ECT2/FIS1/DYNC1H1/PDCD10/MTMR2/VPS11/NUTF2/PSEN1/BBC3/GDI1/RBM22/MIEF2/NUMA1/NUP62/RIOK2/FYN/IFI27/MYO1C/PLK3/RAC2/RAN/CHMP3/RNF31/OAZ2/NEDD4/EHD1/GCC2/TPR/MAP1B/CHP1/MICALL2/PPP1R13B/SPAG5/ANXA2/LMAN1/SEC…
GOBP_REGULATION_OF_CELLULAR_COMPONENT_SIZE	GOBP_REGULATION_OF_CELLULAR_COMPONENT_SIZE	356	0.307577	1.20609	0.00725026	0.134613	0.115625	9255	tags=53%, list=50%, signal=27%	SCTR/ARHGAP40/DRAXIN/MAGEL2/NTN1/TMSB15B/TRPV4/CCL26/AQP11/PLXNA3/SPIRE2/ISLR2/PLEKHH2/PAK1/RILP/SLC12A9/CARMIL1/PFN4/SEMA4F/BAIAP2/SLC12A2/PLS1/CCL24/ADD3/EPHA7/IST1/JMY/SEMA3B/SEMA3F/E2F4/TSC1/SLC12A7/CDK4/SLC12A4/GMFG/CDC42EP1/WDTC1/TRIOBP/SEMA4B/SSH3/PTK2B/FLII/CDK5/SVIL/BAIAP2L1/VAV2/CXCL12/FER/SEMA4D/TRPV2/RASA1/CDH4/SSH1/GDI1/COTL1/SCIN/RYK/WNT3/CAPZB/MYO1C/CFL2/LMOD1/AP2M1/MAP1B/SWAP70/CR…
GOBP_TYPE_I_INTERFERON_PRODUCTION	GOBP_TYPE_I_INTERFERON_PRODUCTION	123	0.358444	1.33608	0.00725026	0.134613	0.115625	7893	tags=53%, list=42%, signal=31%	MMP12/DHX58/TLR7/IRF5/IRF8/LILRB1/NMI/NLRC3/ZBP1/DTX4/PIN1/IRF3/TLR3/NLRX1/TIRAP/GPATCH3/POLR3B/RNF216/TRIM21/POLR3F/TLR2/CD14/PLCG2/HERC5/POLA1/SYK/IRAK1/SETD2/EP300/DDX3X/PYCARD/XRCC6/IRF1/POLR3E/G3BP1/YY1/POLR3G/CACTIN/PCBP2/IRF7/HMGB2/TOMM70/PTPN11/STAT1/NFKB2/RIOK3/CREBBP/RNF26/POLR3H/PPM1B/TAX1BP1/RELA/TICAM1/RELB/HSPD1/RIPK2/POLR3C/IKBKE/PRKDC/MYD88/NFKB1/REL/TLR4/PTPN22/IFI16
GOBP_DETECTION_OF_CHEMICAL_STIMULUS_INVOLVED_IN_SENSORY_PERCEPTION_OF_TASTE	GOBP_DETECTION_OF_CHEMICAL_STIMULUS_INVOLVED_IN_SENSORY_PERCEPTION_OF_TASTE	35	-0.269033	-1.655	0.00725288	0.134613	0.115625	1098	tags=34%, list=6%, signal=32%	RTP3/TAS2R30/TAS2R50/RTP5/GNAT1/GNAT3/TAS2R39/TAS1R2/TAS2R1/TAS2R8/TAS2R7/TAS2R9
GOBP_REGULATION_OF_APPETITE	GOBP_REGULATION_OF_APPETITE	19	0.52846	1.56799	0.00737338	0.135067	0.116015	2401	tags=32%, list=13%, signal=28%	SCTR/CARTPT/SPX/HTR4/BBS2/PPARA
GOCC_ENDOLYSOSOME	GOCC_ENDOLYSOSOME	23	0.516221	1.5898	0.0073976	0.135067	0.116015	5813	tags=52%, list=31%, signal=36%	TLR7/CLEC16A/LGMN/TLR3/AP2A2/AP2B1/CLTC/AP2M1/SMPD1/AP2S1/PRKCD/CTSL
GOBP_CELLULAR_AMINO_ACID_METABOLIC_PROCESS	GOBP_CELLULAR_AMINO_ACID_METABOLIC_PROCESS	298	0.312611	1.21759	0.00739898	0.135067	0.116015	10443	tags=63%, list=56%, signal=28%	TH/NOS1/TAT/ACMSD/UROC1/UPB1/BHMT/NOS2/THNSL2/DCT/ASPG/BAAT/PIPOX/ATCAY/HOGA1/ALDH8A1/AMT/NAT8L/MTHFS/NOXRED1/AZIN2/HNMT/CRYM/FOLH1/AASDH/HPD/BCAT1/AGXT/MAT1A/PARS2/SDSL/PSMB10/PSMC1/AASS/AARS2/ABAT/CTPS2/SARS2/SIRT4/NOS3/MCCC2/GADL1/ALDH5A1/MCCC1/SLC25A12/HSD17B10/MTHFR/PSMA6/ACAT1/GCLC/PSME4/BCKDK/PSME2/OAZ2/AIMP2/PSMB3/GART/CDO1/HARS2/PSME3/MTR/RIDA/GOT1/GSS/DDAH2/GLUD2/PSMC6/ACCS/SHMT2/AIMP1/…
GOBP_EXOCYTIC_PROCESS	GOBP_EXOCYTIC_PROCESS	76	0.386495	1.38873	0.00739898	0.135067	0.116015	8676	tags=57%, list=47%, signal=30%	ERC2/STX1B/SNCA/P2RX1/VPS18/CFTR/BTK/PPFIA3/YKT6/STXBP2/EXOC4/RALB/VPS33A/VPS11/PSEN1/BLOC1S6/SYK/SYTL2/SNAP23/VAMP3/RAB13/SYNJ1/RAB12/VTI1B/EXOC6/PLEK/SNAP29/SCFD1/EXOC6B/STXBP3/STX2/CTBP2/RAB10/LYN/PRRT2/SCFD2/RAB3D/GRIK5/UNC13A/UNC13B/RAB3A/SYT9/VAMP7
GOBP_REGULATION_OF_INTRACELLULAR_PROTEIN_TRANSPORT	GOBP_REGULATION_OF_INTRACELLULAR_PROTEIN_TRANSPORT	241	0.32135	1.24176	0.00739898	0.135067	0.116015	9541	tags=59%, list=51%, signal=29%	CHP2/PDZK1/SLC51B/CAMK1/CEP131/SHH/INSIG1/PAK1/ERBB2/HSPA1L/BCAS3/CABP1/LCP1/SP100/NUCB1/ABLIM3/SUFU/HUWE1/SIRT7/HDAC3/SREBF2/CD36/CDK5/ECT2/FIS1/PDCD10/VPS11/NUTF2/PSEN1/BBC3/GDI1/RBM22/MIEF2/NUP62/RIOK2/FYN/IFI27/MYO1C/PLK3/RAC2/RAN/RNF31/OAZ2/GCC2/TPR/CHP1/MICALL2/PPP1R13B/LMAN1/HAX1/ITGB1BP1/HSP90AB1/TARDBP/GZMB/PTPN1/DMAP1/BARD1/HTRA2/TCAF1/PARK7/OAZ1/MDFIC/CTDSPL2/STOM/UBR5/SH3GLB1/YWHAB/PT…
GOBP_T_CELL_ACTIVATION	GOBP_T_CELL_ACTIVATION	450	0.299624	1.18394	0.00739898	0.135067	0.116015	8737	tags=52%, list=47%, signal=28%	PLA2G2F/AIRE/LGALS9C/IL1A/CCR9/IL1RL2/SFTPD/TNFRSF13C/NOD2/CLECL1/KLRC1/IL6/IL23A/LAT/CCR2/PRKCQ/SIRPB1/LMO1/NLRP3/DLG5/NHEJ1/LAG3/FOXN1/MYB/TFRC/CD3G/DPP4/TCIRG1/SHH/RASGRP1/CYP26B1/PAK1/PIK3CD/ZAP70/ICOS/RIPOR2/CD274/KIT/LILRB1/ERBB2/NLRC3/HHLA2/GPAM/MICB/PRKCZ/LY9/CLEC7A/CTLA4/HFE/ITGAL/RHOH/PRDM1/EPO/ADA/PSMB10/LCP1/VSIR/PNP/ZFP36L1/STAT5B/TSC1/LGALS9/IL4R/RASAL3/RARA/CCDC88B/MAFB/AGER/ZBTB7B…
GOBP_REGULATION_OF_TOLL_LIKE_RECEPTOR_SIGNALING_PATHWAY	GOBP_REGULATION_OF_TOLL_LIKE_RECEPTOR_SIGNALING_PATHWAY	68	0.395202	1.40805	0.00747334	0.135185	0.116117	9449	tags=60%, list=51%, signal=30%	BPIFB1/NLRP2B/NOD2/IFI35/TLR3/ESR1/TIRAP/TLR5/CD36/TLR2/CD14/IRAK3/SMPDL3B/DDX3X/IRF1/CACTIN/LY96/IRF7/LBP/OTUD4/LGR4/MFHAS1/LYN/PJA2/GRAMD4/TICAM1/F2RL1/LRRC14/PELI1/NR1D1/APPL1/TLR4/PTPN22/CAV1/TLR6/NFKBIL1/RAB7B/TLR1/IRF4/CYBA/APPL2
GOBP_RESPONSE_TO_INTERLEUKIN_6	GOBP_RESPONSE_TO_INTERLEUKIN_6	40	0.440985	1.48617	0.00752597	0.135185	0.116117	8954	tags=70%, list=48%, signal=36%	TDGF1/IL6/C1QTNF4/ABCC2/PID1/IL6R/FER/PTGIS/YAP1/SELPLG/PTPN11/IL6ST/STAT1/JAK2/SPI1/ST18/JAK1/RELA/SRC/HAMP/SMAD4/PHB/CBL/CTR9/NFKB1/ICAM1/FOXA2/PPARGC1A
GOBP_POSITIVE_REGULATION_OF_EPITHELIAL_CELL_MIGRATION	GOBP_POSITIVE_REGULATION_OF_EPITHELIAL_CELL_MIGRATION	142	0.346439	1.30482	0.0075477	0.135185	0.116117	9348	tags=58%, list=50%, signal=29%	TDGF1/FOXC2/ITGA2/GPLD1/PIK3CD/HBEGF/RAB25/BCAS3/FGF7/ATOH8/LGMN/IQSEC1/RHOB/ADAM9/STAT5A/MAP3K3/TEK/ZNF580/NOS3/PTK2B/PLPP3/ADAM17/PDGFB/PRKD2/CLASP2/PLCG2/NRP2/ITGB1BP1/CALR/FOXP1/RAC1/PIK3C2A/NRP1/SASH1/GPI/VEGFC/MAP4K4/RREB1/AAMP/PDCD6/ETS1/SRPX2/TGFB2/SOX9/PRKD1/TMSB4X/SCARB1/NFE2L2/FUT1/SP1/SEMA5A/PPM1F/RIN2/HDAC9/MAPRE2/GRN/SRC/SMOC2/BMP4/RHOJ/HDAC6/RRAS/PRKCA/FGF2/VEGFA/CLASP1/CIB1/GLIPR2…
GOBP_REGULATION_OF_CHROMOSOME_SEGREGATION	GOBP_REGULATION_OF_CHROMOSOME_SEGREGATION	83	0.377029	1.36518	0.0075477	0.135185	0.116117	8401	tags=58%, list=45%, signal=32%	TEX14/DUSP1/USP44/BECN1/PLK1/CDT1/SIRT2/HECW2/ANAPC1/ZWINT/CDC26/RAD18/TACC3/NUMA1/RIOK2/ANAPC11/LCMT1/PLSCR1/TPR/IK/CDC6/AURKB/SMC5/PSMG2/CSNK2A1/CENPF/MAD1L1/PUM2/CDC23/CUL3/HORMAD1/ANAPC15/RCC2/RB1/ATM/TTK/CDC16/KLHL22/NSMCE2/HNRNPU/MKI67/BUB3/APC/MAD2L1/GEN1/SPDL1/WAPL/BUB1B
GOBP_REGULATION_OF_DNA_BINDING_TRANSCRIPTION_FACTOR_ACTIVITY	GOBP_REGULATION_OF_DNA_BINDING_TRANSCRIPTION_FACTOR_ACTIVITY	417	0.303317	1.19468	0.0075477	0.135185	0.116117	9121	tags=54%, list=49%, signal=28%	NLRP2B/NR0B2/TRIM31/EPHA5/PLA2G10/NOD2/SFRP5/S100A9/BEX1/EDA2R/IL6/NLRP12/PRKCQ/CDKN2A/TRIM34/NLRP3/TRIM6/FANK1/ESR2/TFRC/TNF/SPHK1/SHH/KIT/CRTC1/NLRC3/LRP8/MAPK10/FOXH1/PRKCZ/MAPK3/BTK/CYP1B1/BMP7/TLR3/DDR2/CARF/PKD1/KDM5A/JMY/SP100/UBE2V1/NWD1/ESR1/TRIM22/TIRAP/LGALS9/FOXS1/SUFU/TRIM21/ID2/PTCH1/LRP6/AGER/SLCO3A1/STK36/CD36/CCDC22/ARRB1/ID1/TLR2/MID2/PLPP3/TAF1/TNFRSF4/FER/CYTL1/HEYL/ERBIN/ARID…
GOCC_NUCLEAR_MEMBRANE	GOCC_NUCLEAR_MEMBRANE	284	0.315401	1.22594	0.0075477	0.135185	0.116117	9608	tags=56%, list=52%, signal=28%	ATP1B4/MPL/P2RX1/GCHFR/SPAG4/ALOX5AP/GRK5/QRICH2/PAK1/POM121/RNF123/PRICKLE2/CLMN/NUP210/DMPK/TMC8/NEMP1/DTL/MCM3AP/ATP2A3/CDK4/PHF11/THAP7/INTS5/SENP2/KLHDC2/SLC29A2/DTX2/OSBPL3/DHX37/TM7SF2/SLC30A1/SYNE1/TMEM176B/GTPBP4/ERBIN/CUEDC2/NUP133/TNRC18/ZBED1/TEX2/NUTF2/BRIP1/PSEN1/RIF1/PRKG2/NUP62/DNAJB2/TMX4/TMEM109/IFI27/PRICKLE1/GTF3C3/SIGMAR1/MFSD10/TPR/CDH5/ERN1/RNF6/HAX1/AKIRIN1/EGFR/HOXA7/P2RX…
GOBP_POSITIVE_REGULATION_OF_B_CELL_MEDIATED_IMMUNITY	GOBP_POSITIVE_REGULATION_OF_B_CELL_MEDIATED_IMMUNITY	35	0.453634	1.50089	0.00756402	0.135185	0.116117	6204	tags=49%, list=33%, signal=32%	FCER2/NOD2/LTA/TFRC/TNF/BTK/KMT5C/EXOSC6/CD226/MLH1/RIF1/MSH2/TP53BP1/HLA-E/HPX/HMCES/PTPRC
GOCC_OUTER_MITOCHONDRIAL_MEMBRANE_PROTEIN_COMPLEX	GOCC_OUTER_MITOCHONDRIAL_MEMBRANE_PROTEIN_COMPLEX	21	0.512688	1.55092	0.00756779	0.135185	0.116117	7038	tags=71%, list=38%, signal=45%	MTX3/DNAJC11/CHCHD6/TOMM20L/APOOL/MFN1/CHCHD3/IMMT/MTX2/TOMM5/TOMM22/TOMM70/SAMM50/TOMM40L/MTX1
GOBP_GOLGI_VESICLE_TRANSPORT	GOBP_GOLGI_VESICLE_TRANSPORT	360	0.307936	1.20801	0.00769716	0.136135	0.116933	9958	tags=59%, list=53%, signal=28%	GRIA1/AMN/TRAPPC5/CTAGE8/DNAJC28/ANK2/BBS2/SPIRE2/ANK1/INSIG1/KLHL20/CEP19/GOSR2/GAS1/BBS1/TGFA/RBSN/COG4/SNX8/AP1G2/CORO7/LMAN2/DCTN1/SEC23B/TRAPPC2/PKDCC/DYNC1I1/YKT6/STEAP2/GBF1/ARFGEF2/ATP9B/CCDC93/EXOC4/CCDC22/AP3D1/SNX12/YIF1A/PLPP3/GORASP1/VAMP5/SCAMP2/COPZ2/PPP6R1/COG2/TMED10/DYNC1H1/COG1/VPS13C/GOSR1/VPS52/CNST/GOPC/KIF5A/COG7/TEX261/BET1L/CAPZB/GOLGA7/CCDC91/SEC22C/RABEP1/GCC2/SNAP23/TR…
GOCC_AZUROPHIL_GRANULE_LUMEN	GOCC_AZUROPHIL_GRANULE_LUMEN	89	0.375303	1.36486	0.00769716	0.136135	0.116933	7560	tags=51%, list=41%, signal=30%	PRSS2/ORM2/MPO/SERPINB3/S100A7/AZU1/PLAC8/GALNS/PADI2/MNDA/GGH/AGA/FUCA1/TXNDC5/IST1/DPP7/DYNC1H1/GM2A/FUCA2/FAF2/ANXA2/IMPDH1/ACTR10/PYCARD/MAN2B1/VCP/C6orf120/DSN1/CYB5R3/ADA2/BPI/DNAJC3/PRKCD/FTL/CTSC/SDCBP/CTSG/GDI2/FRK/GRN/HEBP2/PSMD1/CCT8/PYGB/TOLLIP
GOMF_UBIQUITIN_LIKE_PROTEIN_TRANSFERASE_ACTIVITY	GOMF_UBIQUITIN_LIKE_PROTEIN_TRANSFERASE_ACTIVITY	421	0.303362	1.19536	0.00769716	0.136135	0.116933	7555	tags=47%, list=41%, signal=29%	C10orf90/TRIM71/RNF133/TRIM74/TRIM31/TRIM50/NCCRP1/TRIM54/MKRN3/MAGEL2/ASB12/TRIM34/RNF175/PJA1/TRIM6/BRCA1/VPS18/KLHL20/MIB2/FBXO10/RNF123/DTX4/WDSUB1/HACE1/NEURL1B/HERC6/UBE2S/RNF150/ASB1/DDB2/RNF183/AKTIP/RING1/FBXO11/DTL/HECTD4/RNF168/TRIM22/HERC2/RNF216/TRIM21/HUWE1/UBE3B/RNF214/DTX3/DTX2/KLHL42/DZIP3/RNF165/HECW2/TAF1/SMURF1/PPIL2/MED18/KCTD10/FBXO21/FBXO25/ATG16L1/ZBED1/VPS11/UBE2Z/TRIM39/…
GOBP_DEFENSE_RESPONSE_TO_FUNGUS	GOBP_DEFENSE_RESPONSE_TO_FUNGUS	32	-0.276721	-1.50221	0.00770269	0.136135	0.116933	1496	tags=34%, list=8%, signal=32%	ARG1/RNASE7/DEFB106B/DEFA6/DEFA5/IL17A/DEFA3/CLEC6A/DEFB114/DEFA1B/DCD
GOBP_CDP_DIACYLGLYCEROL_BIOSYNTHETIC_PROCESS	GOBP_CDP_DIACYLGLYCEROL_BIOSYNTHETIC_PROCESS	13	0.5976	1.64385	0.007769	0.136773	0.11748	5602	tags=62%, list=30%, signal=43%	GPAT3/GPAM/CDS1/GPAT4/AGPAT3/AGPAT5/LCLAT1/AGPAT2
GOMF_ATP_DEPENDENT_MICROTUBULE_MOTOR_ACTIVITY_MINUS_END_DIRECTED	GOMF_ATP_DEPENDENT_MICROTUBULE_MOTOR_ACTIVITY_MINUS_END_DIRECTED	18	0.528392	1.55053	0.00777981	0.136773	0.11748	3228	tags=50%, list=17%, signal=41%	DNAH10/DNAH6/DNAH2/DNAH5/DNHD1/DNAH1/DYNC1H1/DYNC2H1/DNAH12
GOBP_EPIDERMAL_GROWTH_FACTOR_RECEPTOR_SIGNALING_PATHWAY	GOBP_EPIDERMAL_GROWTH_FACTOR_RECEPTOR_SIGNALING_PATHWAY	120	0.355268	1.32349	0.00784661	0.136864	0.117559	9520	tags=60%, list=51%, signal=30%	SLC30A10/HAP1/FAM83B/PIGR/AFAP1L2/HBEGF/TGFA/MVB12B/RHBDF1/REPS2/EPN1/PTK2B/ADAM17/FER/SNX5/ERBIN/CCDC88A/DUSP3/SPRY1/PSEN1/SHC1/RNF126/NUP62/WDR54/GPRC5A/SOCS4/DGKD/CBLB/HIP1R/EGFR/SOS1/CEACAM1/TSG101/STAM2/GRB7/SH3KBP1/PIK3C2A/GRB2/PTPN11/PLAUR/AGR2/SH3GL2/ARF4/IFI6/NCK2/SOX9/RPS6KA5/GPER1/RASSF2/ARHGEF7/ZFYVE28/RHBDF2/HGS/PIK3CA/SRC/ADRA2A/VPS25/CBL/GAREM1/SHKBP1/NEU3/PTPN12/IQGAP1/EPS15L1/BCA…
GOBP_TRANSLATIONAL_ELONGATION	GOBP_TRANSLATIONAL_ELONGATION	130	0.34614	1.29514	0.00784661	0.136864	0.117559	9951	tags=63%, list=53%, signal=30%	MRPS24/MRPL38/EEF1A2/TRNAU1AP/CPEB3/MRPL11/MRPS31/AURKAIP1/DPH3/MRPL21/MRPL46/MRPL49/MRPS7/MRPS12/EEF1G/EFL1/MRPS27/MRPS18B/PTCD3/NEMF/EEF2K/MRPS21/MRPL48/USP16/MRPS17/EIF5A/MRPL17/MRPL51/GFM1/MRPS35/EEFSEC/MRPS22/EEF1B2/MRPS15/MRPL18/MRPS9/SECISBP2/MRPL13/DPH7/DPH5/MRPS28/MRPL58/RPLP1/SECISBP2L/TSFM/MRPL20/MRPL52/SEPSECS/MRPL40/MRPL3/MRPL9/DPH6/MRPL34/MRPL54/MRPL22/MRPL35/MRPL39/MRPS2/MRPL2/MRPL…
GOMF_STRUCTURAL_CONSTITUENT_OF_RIBOSOME	GOMF_STRUCTURAL_CONSTITUENT_OF_RIBOSOME	157	0.331913	1.25734	0.00784661	0.136864	0.117559	10805	tags=69%, list=58%, signal=29%	MRPS24/RPL3L/MRPL11/RPL21/MRPS31/MRPL21/MRPL46/RPL26L1/MRPL49/SRBD1/MRPS7/MRPS12/RPS10/MRPS18B/MRPS21/MRPS17/RPS12/MRPL17/MRPL51/RPL7L1/RPL3/RPS27/MRPS35/UBA52/MRPS22/RPS9/RPS28/RPL23A/MRPS15/RPL31/RPS23/MRPL18/RPS19/RPL37A/MRPS9/RPS3/RPL39L/RPS15A/RPL18/RPL11/MRPL13/RPL28/RPL5/RPL32/RPS8/RPS24/RPS18/RPL26/RPS4Y1/RPS25/RPL14/RPL24/RPLP1/RPL27A/RPL10/RPS6/RPL22L1/RPS15/MRPL20/RPSA/MRPL52/RPS20/RPL…
GOBP_CILIARY_BASAL_BODY_PLASMA_MEMBRANE_DOCKING	GOBP_CILIARY_BASAL_BODY_PLASMA_MEMBRANE_DOCKING	94	0.365857	1.33838	0.00799607	0.138744	0.119174	10447	tags=68%, list=56%, signal=30%	TUBB4A/TUBA4A/CENPJ/CEP131/CEP89/PLK1/KIF24/FBF1/CEP72/DCTN1/CEP192/MARK4/CEP152/DYNC1H1/NPHP1/NEK2/C2CD3/B9D1/TUBA1A/CSNK1E/NEDD1/RPGRIP1L/TMEM216/CEP78/CEP162/CETN2/HAUS4/YWHAG/CEP41/TCTN3/ODF2/ALMS1/NDE1/AHI1/TMEM67/HAUS6/DYNLL1/YWHAE/B9D2/SSNA1/RAB3IP/PPP2R1A/CC2D2A/CEP70/CLASP1/CEP250/CKAP5/PCNT/CEP290/CNTRL/HSP90AA1/HAUS7/TUBB4B/PCM1/NPHP4/CEP135/MKS1/DCTN3/AKAP9/HAUS5/IQCB1/ACTR1A/CDK1/PAF…
GOMF_LIGAND_GATED_CATION_CHANNEL_ACTIVITY	GOMF_LIGAND_GATED_CATION_CHANNEL_ACTIVITY	103	0.366096	1.34836	0.00799607	0.138744	0.119174	1979	tags=27%, list=11%, signal=24%	CHRNB4/HTR3E/GRIN2B/CHRNB2/CHRNA7/TRPV1/GRIA1/CHRNA3/KCNJ15/KCNJ12/KCNE2/GRIN1/P2RX1/ASIC4/CHRNA6/KCNH2/RYR3/ABCC8/GRIA3/ASIC3/GRIK2/ASIC1/KCNJ10/KCNK6/KCNJ5/MCOLN3/SHROOM2/GRIN2D
GOBP_NEGATIVE_REGULATION_OF_DNA_RECOMBINATION	GOBP_NEGATIVE_REGULATION_OF_DNA_RECOMBINATION	28	0.489155	1.5584	0.00803114	0.138991	0.119386	4452	tags=57%, list=24%, signal=44%	ZSCAN4/RTEL1/RECQL5/HELB/UBQLN4/KLHL15/MLH1/PARPBP/THOC1/MSH3/TERF2/RIF1/MSH2/MAGEF1/TERF2IP/TP53BP1
GOBP_AUTOPHAGOSOME_MATURATION	GOBP_AUTOPHAGOSOME_MATURATION	41	0.439744	1.48584	0.00819464	0.141453	0.121501	6467	tags=56%, list=35%, signal=37%	LIX1/MAP1LC3B2/IRGM/ADRB2/CLEC16A/RUBCNL/UBQLN4/TBC1D25/MAP1LC3C/PHF23/VPS33A/MFSD8/GABARAPL1/CHMP3/UVRAG/TSG101/LAMP2/VCP/SNAP29/STX17/MAP1LC3A/CALCOCO2/GABARAP
GOBP_ERYTHROCYTE_HOMEOSTASIS	GOBP_ERYTHROCYTE_HOMEOSTASIS	114	0.358116	1.32616	0.00829498	0.142223	0.122162	10109	tags=73%, list=54%, signal=34%	ALAS2/ETV2/KIT/EPO/SH2B3/ZFP36L1/HOXA5/STAT5B/LDB1/MAFB/INPP5D/P4HTM/CDK6/ARID4A/MAEA/PRMT1/ARNT/BRD1/ALAS1/HIPK2/HSPA1A/KMT2E/L3MBTL3/ERCC2/DYRK3/GATA1/RBFOX2/G6PD/ADGRF5/HMGB2/IKZF1/CEBPG/MED1/STAT1/JAK2/MPIG6B/ETS1/RPS19/MAPK14/SPI1/HOXB6/RPS24/ANKRD54/KAT7/MFHAS1/ZNF16/RB1/RPS6/SP3/LYN/TMOD3/JAK3/INHBA/ZFPM1/BMP4/SLC25A38/BPGM/ACVR1B/BCL6/PRKDC/SRF/VEGFA/TGFBR3/FAM210B/SMAP1/HSPA1B/LYAR/AXL/N…
GOCC_INNER_MITOCHONDRIAL_MEMBRANE_PROTEIN_COMPLEX	GOCC_INNER_MITOCHONDRIAL_MEMBRANE_PROTEIN_COMPLEX	118	0.359528	1.33592	0.00829498	0.142223	0.122162	9040	tags=59%, list=48%, signal=31%	COX6A2/MTX3/WDR93/DNAJC11/C15orf48/CHCHD6/APOOL/NDUFS6/NDUFS8/AFG3L2/CHCHD3/UQCC3/IMMT/PPIF/NDUFA10/NDUFA11/UQCRQ/NDUFC1/MTX2/SDHAF4/TIMM10B/NDUFA6/NDUFS3/NDUFB7/COX7C/TIMM17B/MICU2/NDUFA8/AGK/MCU/GRPEL1/SMDT1/GRPEL2/NDUFA12/MT-CO1/NDUFB9/NDUFA9/MT-ATP6/ROMO1/NDUFA5/SAMM50/SLC25A6/MCUB/NDUFB1/TIMM22/UQCRFS1/NDUFB4/NDUFV3/NDUFB8/MT-ND4/COX6A1/UQCRB/MT-ND5/NDUFB11/MTX1/PHB/TIMM17A/SDHA/NDUFS5/DNAJC…
GOBP_GOLGI_TO_PLASMA_MEMBRANE_TRANSPORT	GOBP_GOLGI_TO_PLASMA_MEMBRANE_TRANSPORT	57	0.407613	1.43262	0.00830327	0.142223	0.122162	7119	tags=60%, list=38%, signal=37%	AMN/BBS2/BBS1/PKDCC/STEAP2/ARFGEF2/CCDC93/EXOC4/CCDC22/VAMP5/CNST/GOPC/GOLGA7/RABEP1/EXOC2/VAMP3/GGA1/EXOC6/EXOC6B/NSF/EXOC8/GOLPH3/OSBPL5/RAB10/EXOC5/EXOC1/LYPLA1/SPTBN1/GOLPH3L/BLZF1/SYS1/GGA3/KRT18/RAB31
GOBP_ALPHA_AMINO_ACID_CATABOLIC_PROCESS	GOBP_ALPHA_AMINO_ACID_CATABOLIC_PROCESS	82	0.378884	1.3714	0.00844443	0.142385	0.122301	8322	tags=56%, list=45%, signal=31%	NOS1/TAT/ACMSD/NOS2/THNSL2/PIPOX/HOGA1/ALDH8A1/AMT/CRYM/HPD/AGXT/MAT1A/SDSL/AASS/NOS3/HSD17B10/ACAT1/CDO1/RIDA/GOT1/DDAH2/GLUD2/SHMT2/GCAT/GLUL/DDAH1/GPT/GLS/FAH/GLUD1/KYAT1/ASRGL1/ASPA/CBSL/AHCY/TDO2/IDO1/GCSH/QDPR/GPT2/CSAD/ALDH7A1/ALDH4A1/MTRR/DLST
GOBP_REGULATION_OF_MONONUCLEAR_CELL_MIGRATION	GOBP_REGULATION_OF_MONONUCLEAR_CELL_MIGRATION	110	0.356378	1.31518	0.00844443	0.142385	0.122301	7582	tags=53%, list=41%, signal=31%	AIRE/C10orf99/S100A14/S100A7/DEFB124/GCSAML/CCR2/CD200R1/ADTRP/DUSP1/TNF/PADI2/NBL1/RIPOR2/CD99L2/MAPK3/LGMN/LGALS9/AGER/PTK2B/CREB3/ADAM17/CXCL12/LRCH1/OXSR1/CRKL/CSF1R/TNFRSF14/WNK1/ECM1/CCL2/ADAM10/AKIRIN1/STK10/PYCARD/CALR/C3AR1/RIPK3/CCL21/CXCL13/SELENOK/CCL20/CCL4/PLCB1/DOCK8/MOSPD2/STK39/C5AR1/CXCL10/LYN/SERPINE1/CRK/CSF1/CXCL14/PDGFD/JAM2/XCL2/APP
GOBP_REGULATION_OF_PROTEIN_POLYMERIZATION	GOBP_REGULATION_OF_PROTEIN_POLYMERIZATION	214	0.327842	1.2607	0.00844443	0.142385	0.122301	10832	tags=67%, list=58%, signal=29%	TUBB4A/ARHGAP40/SNCA/MAGEL2/TMSB15B/CCL26/SPIRE2/PAK1/CARMIL1/PFN4/INPP5J/BAIAP2/CCL24/ADD3/JMY/DCTN1/GMFG/CDC42EP1/TRIOBP/SSH3/PTK2B/FLII/SVIL/BAIAP2L1/FER/RASA1/SSH1/COTL1/SCIN/NUMA1/ARL2/CAPZB/MYO1C/TPPP3/LMOD1/CDH5/MAP1B/MAPT/HSPA1A/PREX1/HAX1/HIP1R/ESAM/PYCARD/TRIM27/FCHSD2/VDAC2/MTPN/GBA2/GMFB/SNX9/EML2/DYRK1A/CAPG/RAC1/CCL21/ARPC4/GRB2/NCKAP1/SPTBN5/TMOD1/ARHGAP18/ARPIN/STMN1/WASF3/ARPC5L/…
GOBP_RNA_SPLICING	GOBP_RNA_SPLICING	434	0.298152	1.17607	0.00844443	0.142385	0.122301	10590	tags=60%, list=57%, signal=26%	RBFOX1/RBM20/ELAVL4/SMN2/DDX47/AFF2/NOL3/AHNAK2/RBFOX3/DHX38/USB1/CELF4/GPKOW/NOVA2/TFIP11/RBM5/CLK4/RBM6/WT1/SREK1/TSEN54/FXR2/CSTF1/SREK1IP1/SRRM2/TSEN34/REST/IWS1/PPIL1/RAVER2/SYMPK/SART1/CPSF4/POLR2A/RBM28/PRPF4/ZC3H13/SYF2/RBM23/THOC1/PRPF6/GTF2F1/CWF19L1/SNRNP35/FASTK/RBM22/SF3A3/PRPF3/SRRT/CD2BP2/THRAP3/DCPS/PRPF19/SRSF5/GTF2F2/CPSF3/PRPF4B/PNN/IVNS1ABP/PSPC1/CTNNBL1/FIP1L1/PPP4R2/DAZAP1/S…
GOMF_LIGASE_ACTIVITY	GOMF_LIGASE_ACTIVITY	128	0.349648	1.30623	0.00844443	0.142385	0.122301	8770	tags=55%, list=47%, signal=30%	ACSM6/ACSBG2/TTLL13P/ACSM2B/TPGS1/ACSM5/PC/MTHFS/TTLL6/TTLL1/AASDH/TTLL11/PARS2/TTLL3/TTLL7/SLC27A2/AARS2/CTPS2/SARS2/MCCC2/ACSS2/NAE1/MCCC1/TTLL5/ACSS1/UBA6/GCLC/PCCB/UBA1/GART/ATP6V1A/HARS2/UBA3/GSS/ATP6V0C/RTCB/PPCS/MOCS3/GMPS/WARS2/PAICS/MT-ATP6/GLUL/FARSB/DIP2A/CARS2/TTL/MTHFD1L/UBA2/RARS2/NARS2/ASS1/GCLM/SLC27A1/ACSL1/ACSM3/DPH6/LIPT2/LIG4/ACSL5/QRSL1/SLC27A5/GATC/CPS1/ACSF3/ACACA/HLCS/FARS…
GOMF_ACTIN_DEPENDENT_ATPASE_ACTIVITY	GOMF_ACTIN_DEPENDENT_ATPASE_ACTIVITY	24	0.500058	1.55229	0.00855126	0.142385	0.122301	5717	tags=54%, list=31%, signal=38%	MYO1A/MYH7/MYO3A/MYH6/MYO7B/MYO1F/MYO15A/MYO19/MYL6/MYO1C/MYH9/MYO1B/MYO1E
GOBP_POSITIVE_REGULATION_OF_VIRAL_GENOME_REPLICATION	GOBP_POSITIVE_REGULATION_OF_VIRAL_GENOME_REPLICATION	31	0.469594	1.52971	0.00856421	0.142385	0.122301	8185	tags=68%, list=44%, signal=38%	IFIT1/TARBP2/PPARA/DDB1/LARP1/DDX3X/PPIH/SRPK1/PPIE/PDE12/NR5A2/SRPK2/PPID/PKN2/HACD3/PABPC1/RAD23A/PPIA/TMEM39A/STAU1/TOP2B
GOBP_DENDRITE_DEVELOPMENT	GOBP_DENDRITE_DEVELOPMENT	231	0.320789	1.23771	0.00859389	0.142385	0.122301	10238	tags=63%, list=55%, signal=29%	CHRNB2/CHRNA7/ITPKA/FEZF2/FLRT1/SHANK1/NTN3/ADGRB3/NGEF/KNDC1/CHRNA3/NTN1/CAMK1/ZDHHC15/DLG4/DLG5/SYNGAP1/LZTS3/IL1RAPL1/CRTC1/LRP8/NFATC4/PARP6/TIAM1/MFSD2A/BMP7/BHLHB9/IQSEC1/MAP1A/EPHA4/COBL/CPEB3/MINK1/ARC/DGKG/ID1/DCDC2/CDK5/HECW2/TANC2/CARM1/GORASP1/SHANK2/SEMA4D/PSEN1/UBA6/CRKL/PAK4/ZNF365/FYN/SS18L1/DCLK1/KLF7/NEDD4/ZMYND8/LLPH/MAP1B/TULP1/VLDLR/CUX1/ADAM10/SRCIN1/LZTS1/PREX1/EEF2K/PRKG1/…
GOBP_POSITIVE_REGULATION_OF_CELL_CYCLE	GOBP_POSITIVE_REGULATION_OF_CELL_CYCLE	366	0.306924	1.20417	0.00859389	0.142385	0.122301	7983	tags=51%, list=43%, signal=30%	CXCR5/SSTR5/IL1A/CYP1A1/ANKRD31/TGM1/DRD2/ASCL1/MEIOC/RXFP3/KCNA5/USP2/DBF4B/BRCA1/SOX15/MUC1/CENPJ/SPHK1/CNOT1/MSX1/ZBED6/HOXA13/DDX11/BECN1/HMGN5/CDT1/CRADD/TGFA/CDCA5/LGMN/TNKS1BP1/ARID3A/ZBED9/CDC25B/PKD1/BTG2/CIT/DTL/STAT5B/E2F4/SMARCD3/MEPCE/CDK4/HCFC1/ATAD5/TRIM21/ID2/RARA/MED25/LRP6/GPSM2/WIZ/SVIL/SIRT2/ADAM17/CARM1/PDGFB/ECT2/CCNT1/THOC1/CDC25C/DYNC1H1/ZNF385A/DUSP3/AURKC/NUMA1/NUP62/PPP…
GOBP_POSITIVE_REGULATION_OF_SYNAPTIC_TRANSMISSION	GOBP_POSITIVE_REGULATION_OF_SYNAPTIC_TRANSMISSION	138	0.343581	1.29104	0.00859389	0.142385	0.122301	4169	tags=33%, list=22%, signal=26%	GRIN2B/CACNG8/IGSF11/HAP1/CHRNA7/CRHR2/DRD1/SHANK1/STX1B/CYP46A1/DRD2/CCR2/SCGN/MPP2/DLG4/NMU/TNF/GRIK2/RASGRF2/CRTC1/PRRT1/NFATC4/CALB2/PRKCZ/ADORA2A/LGMN/GRIN2D/TSHZ3/EPHA4/NRGN/NLGN2/ARC/SERPINE2/AGER/PTK2B/CNR1/CDK5/NCSTN/SHANK2/RGS14/SLC4A8/CREB1/MME/KCTD13/CCL2/EGFR
GOCC_EXOCYTIC_VESICLE	GOCC_EXOCYTIC_VESICLE	206	0.324784	1.24772	0.00859389	0.142385	0.122301	9496	tags=57%, list=51%, signal=28%	SYT10/TH/NTF4/HAP1/RAB40AL/SYT2/KIRREL3/SVOP/STX1B/GRIA1/DRD2/DOC2A/GRIN1/DLG4/SNCAIP/STON2/SYTL5/PRRT1/SYP/SYT17/CLCN5/IQSEC1/RAB27B/WDR7/SYNGR3/RAB35/SYTL1/TPRG1L/NCSTN/CLTB/MTMR2/PSEN1/SV2C/STX16/SLC4A8/RAB40C/SYTL2/STX12/MME/MCTP2/ADAM10/VAMP3/APH1A/VDAC2/SEC22B/TRAPPC4/VDAC1/RAB13/SYNDIG1/RAB12/SLC17A5/BDNF/VTI1B/APBA1/RAB4A/APBA2/SYT4/SLC18A1/SCAMP1/SH3GL2/RAB11B/RABAC1/DNM1L/RAB6A/STX2/MCT…
GOMF_DNA_BINDING_TRANSCRIPTION_REPRESSOR_ACTIVITY	GOMF_DNA_BINDING_TRANSCRIPTION_REPRESSOR_ACTIVITY	301	0.311621	1.21432	0.00859389	0.142385	0.122301	8711	tags=53%, list=47%, signal=29%	TBX18/ZFP57/NKX6-3/ZNF705E/FEZF2/SALL1/HES2/SCRT1/PRDM16/ASCL1/ASCL2/ZBTB32/ZNF750/ZBTB20/ARX/SP5/KCNIP3/OVOL2/ZNF177/MSX1/ZNF248/DLX4/IRF8/ZNF668/ZNF219/SNAI3/ZKSCAN3/PRDM5/DACH1/INSM2/THAP11/NFATC4/TCF21/ZBTB49/IRF3/NFATC3/ZNF439/NACC2/ETV3/EN1/PRDM1/ZNF891/ZBTB5/PPARA/GZF1/SATB1/FOXS1/ZBTB39/REST/TFAP2C/SREBF2/ZNF554/HEYL/FOXK1/HOXB13/PRDM2/ZNF846/ZNF491/ZNF749/ZNF536/ZNF148/NACC1/ZEB1/ELK3/TB…
GOMF_MONOOXYGENASE_ACTIVITY	GOMF_MONOOXYGENASE_ACTIVITY	92	0.365247	1.33398	0.00859389	0.142385	0.122301	3156	tags=34%, list=17%, signal=28%	CYP2A7/TH/CYP4F3/NOS1/CYP8B1/DBH/CYP1A1/CYP7A1/NOS2/CYP46A1/CYP2W1/CYP3A5/CYP4F22/TPH1/CYP4F12/CYP3A43/JMJD7/CYP3A7/FMO4/CYP51A1/CYP26B1/NDOR1/CYP1B1/TBXAS1/NOS3/FMO5/CYP2R1/AKR1D1/COQ6/AKR1C2/PTGIS
GOBP_RESPONSE_TO_NERVE_GROWTH_FACTOR	GOBP_RESPONSE_TO_NERVE_GROWTH_FACTOR	50	0.413227	1.42616	0.00863703	0.142385	0.122301	9083	tags=64%, list=49%, signal=33%	NTF4/KCNC2/TMEM108/NTRK3/RAB35/ID1/ACAP2/KAT2A/EHD1/USP8/CREB1/MAPT/EEF2K/BPTF/BDNF/SH3GL2/DYNC1LI2/NGF/SORT1/CRK/KIDINS220/WASF1/RAPGEF1/KIF1B/E2F1/CBL/APP/CIB1/STMN2/CORO1A/RPL8/AKT1
GOBP_ENDOTHELIUM_DEVELOPMENT	GOBP_ENDOTHELIUM_DEVELOPMENT	125	0.350248	1.30645	0.00874334	0.142385	0.122301	9334	tags=58%, list=50%, signal=29%	COL22A1/NRG1/HAPLN2/SETSIP/FOXC2/TNF/ETV2/HOXA13/XDH/APOLD1/SCUBE1/ATOH8/ACVR1/RHOB/ID1/ENG/PRKD2/GSTM3/ITGAX/S1PR2/HEG1/AFDN/ZEB1/COL18A1/CDH5/MARVELD2/GPX1/CEACAM1/ZDHHC21/SOX18/FOXP1/NRP1/DLL1/CLDN3/PLCB1/COL15A1/BTG1/CLIC4/GJA5/FASN/CNMD/CXCL10/RAP1B/GJA1/WNT7B/F2RL1/BMP4/CD34/ARHGEF26/SMAD4/RAPGEF1/RAP2C/ADAMTS12/DLL4/MYD88/KDM6B/IKBKB/VEGFA/MESP1/MSN/VEZF1/ICAM1/S1PR1/S1PR3/PDPN/CCM2/MYADM/…
GOBP_HOMOPHILIC_CELL_ADHESION_VIA_PLASMA_MEMBRANE_ADHESION_MOLECULES	GOBP_HOMOPHILIC_CELL_ADHESION_VIA_PLASMA_MEMBRANE_ADHESION_MOLECULES	166	0.336965	1.28308	0.00874334	0.142385	0.122301	4255	tags=35%, list=23%, signal=27%	PCDHA6/DSG4/CEACAM5/PCDHA9/PCDHAC1/PCDHA13/PCDH8/IGSF11/CEACAM6/CDH22/PCDHGA8/PCDHB3/DSG3/KIRREL3/PCDHGB7/CADM3/CNTN6/PCDHGA5/PCDHGB1/PCDHGB2/PCDHA3/PCDHB5/PCDHA12/PCDHGA3/PCDHGA7/PCDHGC4/CDH18/PCDHGA1/PCDHB13/PCDHB4/TRO/PCDHGA10/FAT3/CDH15/DSC3/CDH10/PCDH9/PCDHGC5/CDH24/PCDHGA11/CELSR1/PCDHB14/DCHS2/PKD1/PCDHB12/CDH17/CDH2/PCDH12/PCDH18/PCDHB9/CDH4/PCDHGB3/EMB/CDH5/PALLD/ESAM/PCDHB6/CEACAM1
GOBP_NEURON_DEATH	GOBP_NEURON_DEATH	328	0.308678	1.20656	0.00874334	0.142385	0.122301	9935	tags=58%, list=53%, signal=28%	NTF4/SLC30A10/GRIN2B/POU4F3/GRM4/FOXB1/CHRNA7/DRAXIN/GRID2/SNCA/ASCL1/CD200R1/TGFB3/MYB/TNF/SYNGAP1/TFAP2B/GRIK2/NFATC4/ADORA2A/NMNAT1/PIN1/LGMN/BHLHB9/EN1/EPHA7/EPO/NES/GPR75/PSMC1/BTG2/CIT/GABRB2/TSC1/RILPL1/PPARA/DDIT4/PARP2/REST/PTK2B/ARRB1/NAE1/CDK5/NCSTN/ATN1/RASA1/PSEN1/NQO2/SSH1/AP2B1/HDAC4/PPP5C/UBE2M/SLC23A2/FYN/DPYSL4/IL13/SIGMAR1/AIMP2/INPP5A/MSH2/FBXO7/CHP1/PPP1R13B/CREB1/MAPT/CCL2/H…
GOBP_PHOSPHOLIPID_METABOLIC_PROCESS	GOBP_PHOSPHOLIPID_METABOLIC_PROCESS	397	0.302208	1.18819	0.00874334	0.142385	0.122301	10867	tags=64%, list=58%, signal=27%	APOA5/PLA2G2F/PLPPR3/GPD1/PLA2G4D/ITPKA/PLA2G10/HMGCS2/PIP5KL1/CYP2W1/ACHE/LCAT/BMX/GPLD1/GPAT3/LPL/MBOAT1/PLCD1/ABHD8/LPCAT4/PLA2G15/PIGO/PLB1/MTMR3/PIK3CD/LPIN3/THEM5/CISH/ABHD6/INPP5B/CETP/GPAM/STARD10/VAC14/DGKE/DGKA/PNPLA6/AJUBA/MFSD2A/INPP5J/MTMR10/FDPS/MTM1/TAZ/ABHD16A/PIGG/GDPD1/SAMD8/PMVK/TTC7A/CPNE6/CHKB/PI4KB/PIGL/PIGF/SOCS7/PLCD4/DGKG/PCYT1A/SLC44A3/DOLPP1/PIGV/DGKZ/SBF1/APOC2/PLPP3/I…
GOBP_SYNAPSE_ASSEMBLY	GOBP_SYNAPSE_ASSEMBLY	169	0.338785	1.29155	0.00874334	0.142385	0.122301	9453	tags=59%, list=51%, signal=29%	IL1RAPL2/LRRTM1/AMIGO3/CHRNB2/LRTM2/NPAS4/GRID2/PCDHB3/DRD1/KIRREL3/SLIT1/SHANK1/ADGRB3/PCDHB5/FLRT3/DRD2/SNCA/NTN1/PCDHB13/PCDHB4/ACHE/LRRN3/DLG5/IL1RAPL1/GPC6/LRRC4/PCDHB14/BHLHB9/GAP43/EPHA7/LRFN3/GABRB2/NLGN2/CDH2/TLR2/CDK5/LRFN1/SHANK2/PCDHB9/SEMA4D/SPOCK2/PLXND1/RYK/CRKL/ADGRL2/SETD5/MAP1B/ADGRB1/EEF2K/CUX2/PCDHB6/NTNG2/SYNDIG1/NRXN1/BDNF/EIF4G1/LRRTM2/SIX4/PCDHB10/SLITRK5/GNPAT/SRPX2/IGFN1…
GOBP_NEGATIVE_REGULATION_OF_G_PROTEIN_COUPLED_RECEPTOR_SIGNALING_PATHWAY	GOBP_NEGATIVE_REGULATION_OF_G_PROTEIN_COUPLED_RECEPTOR_SIGNALING_PATHWAY	47	0.431615	1.4862	0.00875208	0.142385	0.122301	6961	tags=55%, list=37%, signal=35%	HTR1B/DRD2/SNCA/APLP1/ARR3/ADRB2/APLNR/ADA/GRK4/KLK14/ARRB1/RGS14/GRK2/RPGRIP1L/ARRDC3/YWHAB/STMN1/PLEK/HTR2B/MRAP2/MGRN1/RGS4/CRY1/PDE4B/RGS2/GTF2H2
GOBP_CANONICAL_WNT_SIGNALING_PATHWAY	GOBP_CANONICAL_WNT_SIGNALING_PATHWAY	322	0.309609	1.20898	0.0088928	0.142385	0.122301	10440	tags=60%, list=56%, signal=27%	TBX18/AMER3/DRAXIN/WNT6/SOSTDC1/SFRP5/DKKL1/NOTUM/SCEL/PTPRU/TLE6/KREMEN2/TNN/AMER2/AXIN2/WNT9B/APC2/SHH/TMEM198/TMEM88/FZD3/PIN1/PSMB10/WNT8B/PSMC1/LRP6/CDH2/CHD8/PLPP3/LZTS2/CSNK1G1/DAAM2/NLE1/PSEN1/SDC1/RYK/PSMA6/WNT3/BCL9/PSME4/TMEM9/PSME2/AMFR/TBL1X/YAP1/MLLT3/WNK1/SIAH2/INVS/PRICKLE1/PSMB3/CSNK1E/PYGO2/RUVBL2/USP8/PSME3/CTNND1/FZD4/CCNY/RBMS3/EGFR/DDX3X/DVL2/ANKRD6/PSMC6/IGFBP2/CTDNEP1/FRAT…
GOBP_ERBB_SIGNALING_PATHWAY	GOBP_ERBB_SIGNALING_PATHWAY	141	0.344696	1.29795	0.0088928	0.142385	0.122301	9520	tags=59%, list=51%, signal=29%	SLC30A10/NRG1/HAP1/FAM83B/PIGR/AFAP1L2/ERBB2/HBEGF/TGFA/LGMN/MVB12B/RHBDF1/REPS2/NRG4/PTPN18/EPN1/PTK2B/ADAM17/FER/SNX5/ERBIN/CCDC88A/DUSP3/SPRY1/PSEN1/SHC1/RNF126/NUP62/WDR54/GPRC5A/SOCS4/DGKD/CBLB/HIP1R/EGFR/SOS1/CEACAM1/TSG101/STAM2/GRB7/SH3KBP1/PIK3C2A/GRB2/PTPN11/PLAUR/AGR2/SH3GL2/ARF4/IFI6/NCK2/SOX9/RPS6KA5/GPER1/RASSF2/ARHGEF7/ZFYVE28/RHBDF2/HGS/PIK3CA/SRC/ADRA2A/VPS25/CBL/PRKCA/SH3TC2/GAR…
GOBP_REGULATION_OF_PROTEIN_MODIFICATION_BY_SMALL_PROTEIN_CONJUGATION_OR_REMOVAL	GOBP_REGULATION_OF_PROTEIN_MODIFICATION_BY_SMALL_PROTEIN_CONJUGATION_OR_REMOVAL	226	0.322028	1.24045	0.0088928	0.142385	0.122301	9796	tags=58%, list=53%, signal=28%	NOD2/USP44/BRCA1/GNL3L/SPHK1/FOXF2/NMI/CDC20B/PLK1/UBE2S/PIN1/PER2/SENP2/TRIM21/HUWE1/FANCI/SIRT7/HDAC3/ARRB1/FANCM/CDK5/TAF1/GORASP1/GTPBP4/PHF23/PSEN1/DNAJB2/HDAC4/RASSF5/FYN/IVNS1ABP/CENPS/ARNT/SIAH2/PRICKLE1/AIMP2/OGT/CHP1/PEF1/CBLB/HSPA1A/ADGRB1/SKP1/HSP90AB1/DDX3X/TRIP12/PIAS1/GOLGA2/ARRDC3/MALT1/PARK7/SASH1/VCP/UBR5/HDAC8/PIAS3/AXIN1/PDCD6/UBE2D1/SART3/RNF40/ARRDC4/RPS3/RPL11/MTA1/CUL3/RPL…
GOBP_TUMOR_NECROSIS_FACTOR_MEDIATED_SIGNALING_PATHWAY	GOBP_TUMOR_NECROSIS_FACTOR_MEDIATED_SIGNALING_PATHWAY	167	0.330766	1.26026	0.0088928	0.142385	0.122301	8764	tags=54%, list=47%, signal=29%	NLRP2B/TNFRSF13C/LTA/EDA2R/TNFRSF25/TNF/NOL3/SPHK1/PSMB10/PSMC1/TNFSF15/SPATA2/PTK2B/ADAM17/TNFRSF4/CDIP1/CARD16/PSMA6/TNFRSF14/PSME4/PSME2/SYK/RNF31/PSMB3/RBCK1/PSME3/CD70/HSPA1A/PYCARD/PSMC6/TNFSF8/KRT8/COMMD7/EDARADD/PSMC4/PSMB8/TNFRSF1B/PIAS3/ZNF675/PSMD13/PSMC2/STAT1/TNFRSF17/JAK2/CASP4/TRAF4/PSMD11/FAS/PSMD3/PSMB7/PIAS4/ST18/TMSB4X/PSMA2/TNFSF12/CASP8/TNFRSF12A/PSMB1/PSMB2/TAX1BP1/LAPTM5/RE…
GOBP_CARBOHYDRATE_DERIVATIVE_TRANSPORT	GOBP_CARBOHYDRATE_DERIVATIVE_TRANSPORT	80	0.381486	1.37501	0.00890169	0.142385	0.122301	7856	tags=55%, list=42%, signal=32%	CALHM1/SLC28A1/SLC5A2/PLA2G10/SLC15A2/SLC35E3/MFSD2A/ADA/SLC25A4/SLC29A3/SLC29A2/PLEKHA8/SLC35C2/SLC50A1/SLC19A1/SLC37A1/SLC33A1/VLDLR/SLC17A9/SLC25A19/LBP/RALBP1/SLC37A4/AGR2/CR1/SLC25A5/SLC35D1/SLC25A6/SCARB1/SLC35A1/SLC10A7/SLC35A5/ABCC4/GJA1/SLC25A41/SLC25A42/SLC35A2/SLC35A3/SLC29A1/SLC35C1/G6PC3/SLC28A2/SLC29A4/RFT1
GOBP_REGULATION_OF_GRANULOCYTE_CHEMOTAXIS	GOBP_REGULATION_OF_GRANULOCYTE_CHEMOTAXIS	48	0.420298	1.4501	0.0089106	0.142385	0.122301	6744	tags=52%, list=36%, signal=33%	S100A14/S100A7/NOD2/C5AR2/IL23A/DPP4/MPP1/RIPOR2/MAPK3/JAM3/TIRAP/CSF1R/RAC2/AKIRIN1/C3AR1/RAC1/CCL21/MCU/LBP/CD74/DNM1L/MOSPD2/C5AR1/CCL19/CSF1
GOMF_LYSINE_N_METHYLTRANSFERASE_ACTIVITY	GOMF_LYSINE_N_METHYLTRANSFERASE_ACTIVITY	55	0.414167	1.44854	0.0089106	0.142385	0.122301	8601	tags=53%, list=46%, signal=28%	METTL21C/PRDM16/N6AMT1/EHMT2/KMT5C/SETD4/MECOM/ETFBKMT/DOT1L/SETD7/SETD5/MEN1/CAMKMT/SETD2/SMYD2/METTL21A/SETD1B/SETD3/WDR5/SETD1A/ASH1L/SETDB2/ASH2L/EEF1AKMT3/KMT2D/KMT2B/EZH2/KMT2A/SETD9
GOBP_VITAMIN_CATABOLIC_PROCESS	GOBP_VITAMIN_CATABOLIC_PROCESS	13	0.593812	1.63343	0.00891111	0.142385	0.122301	1466	tags=38%, list=8%, signal=35%	CYP4F3/CYP2W1/CYP4F12/MTHFS/CYP26B1
GOBP_HYPOTONIC_RESPONSE	GOBP_HYPOTONIC_RESPONSE	10	0.626019	1.62209	0.00902374	0.143791	0.123509	6109	tags=90%, list=33%, signal=61%	AQP5/ITGA2/TRPV4/OXSR1/SLC12A5/CAB39/MYLK/STK39/TSPO
GOBP_STEROL_TRANSPORT	GOBP_STEROL_TRANSPORT	103	0.364566	1.34272	0.00904225	0.143791	0.123509	6987	tags=47%, list=37%, signal=29%	APOA5/CYP8B1/PLA2G10/ABCG4/ABCA7/GRAMD1B/APOB/LCAT/OSBP2/STARD5/SHH/CES1/CFTR/ABCB4/CETP/ABCA1/ABCA12/LDLRAP1/PTCH1/LRP6/SREBF2/CD36/OSBPL3/APOC2/NAXE/ABCA5/STARD4/NR1H2/VPS4A/STX12/EEPD1/ANXA2/LAMTOR1/GRAMD1A/OSBPL8/OSBPL1A/OSBP/SCARB1/OSBPL5/TSPO/MSR1/ABCA8/APOE/CLU/TTC39B/OSBPL7/NFKBIA/MTTP
GOMF_MICROFILAMENT_MOTOR_ACTIVITY	GOMF_MICROFILAMENT_MOTOR_ACTIVITY	28	0.484729	1.5443	0.00910193	0.14391	0.123611	5717	tags=50%, list=31%, signal=35%	MYH8/MYO1A/MYH7/MYO3A/MYH6/MYO7B/MYH2/MYO1F/MYO15A/MYO19/MYO1C/MYH9/MYO1B/MYO1E
GOBP_POSITIVE_REGULATION_OF_PEPTIDASE_ACTIVITY	GOBP_POSITIVE_REGULATION_OF_PEPTIDASE_ACTIVITY	190	0.322187	1.23381	0.00919171	0.14391	0.123611	9446	tags=59%, list=51%, signal=30%	GRIN2B/SERPINB3/SEMG1/S100A9/SNCA/NLRP12/GRIN1/P2RX1/ACER2/NLRP3/TNFSF10/TNF/ST20/PRSS22/XDH/ACVR1C/CRADD/SEMG2/CLEC7A/LGMN/EPHA4/DLC1/VSIR/TNFSF15/ATP2A3/LGALS9/TBC1D10A/BEX3/AGER/REST/ARRB1/NCSTN/FIS1/BBC3/IFT57/PSME4/FYN/PSME2/SYK/PERP/MAPT/PSME3/HIP1R/APH1A/MAPK12/DDX3X/PYCARD/HTRA2/RCN3/MALT1/VCP/COL4A3/LCK/F3/CASP8AP2/CASP2/JAK2/CLDN3/PDCD6/NKX3-1/ASPH/RPS3/TNFRSF10A/CYCS/FAS/CR1/PML/MAP3K5…
GOBP_REGULATION_OF_GENE_EXPRESSION_EPIGENETIC	GOBP_REGULATION_OF_GENE_EXPRESSION_EPIGENETIC	129	0.350681	1.31118	0.00919171	0.14391	0.123611	9368	tags=63%, list=50%, signal=31%	MORC1/ZFP57/BRCA1/PADI2/SERTAD1/PHF19/TFAP2C/SIRT2/DOT1L/ARID4A/RIF1/MTHFR/UPF1/HDAC4/WBP2/HDAC5/KAT2A/MYO1C/HAT1/POLR1B/GPX1/PPHLN1/MORF4L1/EP300/KDM1B/TRIM27/KAT2B/ZNF335/JARID2/PPM1D/RBBP7/HDAC2/SF3B1/CHEK1/MTA1/SPI1/MTF2/UBR2/POLR1E/UBE2B/MIER1/CREBZF/DPY30/DNMT3B/AEBP2/MYBBP1A/DNMT1/PCGF2/EPC1/METTL3/BAZ1B/SMCHD1/PCGF1/HNRNPU/ASF1A/GLMN/HDAC6/MPHOSPH8/KCNQ1/ATAD2B/MORF4L2/IFI16/SIN3A/KMT2D/R…
GOBP_REGULATION_OF_T_CELL_ACTIVATION	GOBP_REGULATION_OF_T_CELL_ACTIVATION	311	0.310851	1.21291	0.00919171	0.14391	0.123611	8799	tags=52%, list=47%, signal=28%	PLA2G2F/LGALS9C/IL1A/IL1RL2/SFTPD/TNFRSF13C/NOD2/CLECL1/IL6/IL23A/LAT/CCR2/PRKCQ/SIRPB1/LMO1/NLRP3/DLG5/LAG3/FOXN1/MYB/TFRC/DPP4/SHH/CYP26B1/PAK1/ZAP70/ICOS/RIPOR2/CD274/LILRB1/ERBB2/HHLA2/GPAM/PRKCZ/CTLA4/HFE/RHOH/PRDM1/EPO/ADA/VSIR/PNP/STAT5B/LGALS9/IL4R/RASAL3/RARA/CCDC88B/AGER/ZBTB7B/AP3D1/SART1/CD5/MAPK8IP1/DUSP3/SDC4/TNFRSF14/FYN/CD4/KAT2A/NKAP/RAC2/SYK/RC3H2/CD46/CBLB/CD70/CCL2/RUNX1/PYCAR…
GOCC_FICOLIN_1_RICH_GRANULE_LUMEN	GOCC_FICOLIN_1_RICH_GRANULE_LUMEN	124	0.349809	1.30472	0.00919171	0.14391	0.123611	9202	tags=57%, list=49%, signal=29%	CALML5/A1BG/PYGL/ALDOC/HBB/MNDA/ALAD/CAPN1/PNP/GMFG/HUWE1/CANT1/PGAM1/PLEKHO2/COTL1/PAFAH1B2/IDH1/HSPA1A/LRG1/IMPDH1/HSP90AB1/ACTR10/DDX3X/C1orf35/TIMP2/XRCC6/KCMF1/COMMD3/VCP/CAB39/GPI/YPEL5/KPNB1/PSMD13/PSMC2/PPIE/CRISPLD2/JUP/IMPDH2/MAPK14/PSMD11/CDA/PSMD3/PSMB7/PSMA2/PDAP1/ARPC5/PSMB1/COMMD9/MIF/PFKL/QPCT/CCT8/PPIA/PSMC3/KRT1/ALOX5/HSPA1B/ALDOA/CDK13/TNFAIP6/CFD/HSP90AA1/PSMD14/ASAH1/BIN2/CTS…
GOMF_AMIDE_BINDING	GOMF_AMIDE_BINDING	361	0.305055	1.19675	0.00919171	0.14391	0.123611	8548	tags=50%, list=46%, signal=27%	SCTR/SSTR5/CCKAR/GRIN2B/MCHR1/CRHBP/CHRNA7/GNRHR/CRHR2/CCKBR/NOD2/GRIA1/OPRL1/GPR37L1/GRIN1/GLTPD2/ITGA2/ACHE/GSTM2/GRIA3/VIPR2/PC/GPR1/SSTR1/MTHFS/NPR1/NPR2/ERAP2/FOLH1/ADRB2/POM121/LRP8/SRD5A1/ACADL/CABP1/ACVR1/EPHA4/RPS6KB2/LDLRAP1/ACADVL/ANPEP/SEC61A2/VIPR1/TOMM20L/APBB1/AGER/HLA-C/CD36/APBA3/PANK3/PPIL1/LNPEP/TLR2/CD14/RXRA/MCCC1/GSTM3/CLTB/FKBP2/PLEKHA8/NQO2/AP2B1/TYMS/LDLRAD3/SLC19A1/PPIF/…
GOBP_REGULATION_OF_CELL_ADHESION_MEDIATED_BY_INTEGRIN	GOBP_REGULATION_OF_CELL_ADHESION_MEDIATED_BY_INTEGRIN	47	0.430623	1.48278	0.0092009	0.14391	0.123611	8712	tags=72%, list=47%, signal=39%	FOXC2/ACER2/MUC1/DPP4/CYP1B1/TESC/JAM3/ADA/ADAM9/PODXL/P2RY12/CRKL/WNK1/SYK/SWAP70/ITGB1BP1/IFT74/CCL21/CXCL13/PTPN11/RAC3/PTPN6/TGFB2/CD3E/LYN/SERPINE1/CRK/FERMT3/EPHA8/CIB1/SKAP1/FERMT1/NCKAP1L/PIK3CG
GOBP_MICROTUBULE_SEVERING	GOBP_MICROTUBULE_SEVERING	12	0.612436	1.64967	0.00932988	0.144889	0.124452	2973	tags=58%, list=16%, signal=49%	FIGNL2/TTLL6/FIGN/TTLL11/KATNAL2/FIGNL1/LZTS2
GOBP_REGULATION_OF_MACROAUTOPHAGY	GOBP_REGULATION_OF_MACROAUTOPHAGY	158	0.338444	1.28299	0.00934116	0.144889	0.124452	9539	tags=61%, list=51%, signal=30%	PRKAG3/NOD2/IRGM/BECN1/ATG101/ADRB2/SLC38A9/MAPK3/CLEC16A/PRKAB2/GPSM1/RRAGB/MTM1/ULK1/UBQLN4/PRKAB1/CAPN1/TSC1/TBC1D25/EXOC4/TSC2/SESN1/CDK5/SNX5/PRKAA2/PHF23/RALB/VPS13C/QSOX1/ATP6V1D/USP30/ATP6V0E2/ATP6V0A1/ATP6V1A/NEDD4/ATP6V1H/ERN1/RNF41/PAFAH1B2/GNAI3/UVRAG/RRAGC/LZTS1/ATP6V1E2/ATP6V0C/LARP1/LAMTOR1/SEC22B/VDAC1/GAPDH/SH3GLB1/WAC/RAB3GAP2/VPS26B/RRAGA/NUPR1/SCFD1/CAPNS1/VPS13D/SCOC/ATP6V1C1…
GOCC_CELL_LEADING_EDGE	GOCC_CELL_LEADING_EDGE	404	0.302971	1.19199	0.00934116	0.144889	0.124452	10903	tags=62%, list=58%, signal=26%	EPS8L3/DUOXA2/SHISA9/DUOX2/KLHL41/TRPV1/ACTA1/SHISA8/GRIA1/KCNC2/GABRA3/ABCA7/TRPV4/DUOX1/MPP2/PSD/BMX/ANK1/APC2/DPP4/PLEKHH2/KSR1/PAK1/RIPOR2/EPS8L1/CDC42BPG/CARMIL1/BCAS3/SPEF1/TIAM1/PRKCZ/ADORA2A/AJUBA/INPP5J/BAIAP2/FSCN1/NHS/PSD4/FGD2/MTM1/TESC/DLC1/SGCE/JMY/COBL/LCP1/EPS8L2/SRA1/PLEK2/TSC1/ABLIM3/TIRAP/KPTN/GBF1/LDB1/APBB1/CDH2/PTK2B/IFIT5/DGKZ/CDK5/P4HB/PODXL/ADAM17/FER/SNX5/ACAP2/CDK6/CLAS…
GOBP_POSITIVE_REGULATION_OF_GLIOGENESIS	GOBP_POSITIVE_REGULATION_OF_GLIOGENESIS	57	0.405412	1.42489	0.0093505	0.144889	0.124452	9143	tags=63%, list=49%, signal=32%	LTA/IL6/MYB/TNF/SHH/PLAG1/SERPINE2/TLR2/LRP2/SPINT1/PRPF19/ZNF365/EGR2/DICER1/PPP1CC/HDAC2/IL6ST/PRKCI/TNFRSF1B/HDAC1/ETV5/TSPO/LYN/RELA/SOX8/ASPA/BIN1/NKX6-1/HES1/E2F1/TP73/NKX2-2/GJC2/PPARG/UFL1/IL34
GOBP_REGULATION_OF_AMYLOID_PRECURSOR_PROTEIN_CATABOLIC_PROCESS	GOBP_REGULATION_OF_AMYLOID_PRECURSOR_PROTEIN_CATABOLIC_PROCESS	41	0.43585	1.47268	0.00939749	0.144994	0.124542	6999	tags=51%, list=38%, signal=32%	HAP1/CHRNA7/ABCA7/TNF/PIN1/EPHA4/RTN2/SPON1/AGER/TMED10/RTN3/RTN1/SP1/LYN/RELA/IFNGR1/APOE/BIN1/IGF1/CLU/GGA3
GOCC_TELOMERE_CAP_COMPLEX	GOCC_TELOMERE_CAP_COMPLEX	13	0.591793	1.62788	0.00940162	0.144994	0.124542	4433	tags=54%, list=24%, signal=41%	ACD/TEN1/TINF2/TERF2/POT1/XRCC6/TERF2IP
GOBP_REGULATION_OF_TELOMERE_MAINTENANCE	GOBP_REGULATION_OF_TELOMERE_MAINTENANCE	78	0.383128	1.37992	0.00949062	0.144994	0.124542	7497	tags=50%, list=40%, signal=30%	PRKCQ/GNL3L/RTEL1/SMG6/ACD/MAPK3/MAP2K7/TEN1/YLPM1/MAP3K4/TINF2/TERF2/UPF1/NEK2/PPP1R10/NABP2/ERCC4/ERCC1/POT1/AURKB/TERF2IP/NAT10/CCT5/NEK7/PARN/HDAC8/USP7/PML/HNRNPA1/ATM/TCP1/NBN/HNRNPD/SRC/RAD50/HNRNPU/CCT8/CCT4/HMBOX1
GOBP_RNA_CATABOLIC_PROCESS	GOBP_RNA_CATABOLIC_PROCESS	399	0.302351	1.18898	0.00949062	0.144994	0.124542	10646	tags=65%, list=57%, signal=28%	TRIM71/VIP/IGF2BP3/ERN2/ELAVL4/MEIOC/SLFN13/AXIN2/EDC4/CNOT1/PATL2/SMG6/PELO/TNKS1BP1/NANOS1/SMG8/FTO/ZC3H12D/RNASEL/RNASEH2A/PSMB10/PSMC1/BTG2/ZFP36L1/CPEB3/TIRAP/WDR61/EXOSC6/FXR2/RNASEH1/RPL21/DCP1B/MLH1/DIS3L2/DCP1A/ZC3HAV1/TNRC6B/TNRC6A/AGO1/UPF1/FASTK/PSMA6/THRAP3/DCPS/PSME4/PPP2R2A/PSME2/GIGYF2/RPS10/PSMB3/ZHX2/RBM10/RC3H2/ERN1/RNPS1/PSME3/SMG7/RIDA/SLIRP/HSPA1A/SAMD4B/LARP1/CNOT6/SND1/PSM…
GOBP_STRESS_FIBER_ASSEMBLY	GOBP_STRESS_FIBER_ASSEMBLY	99	0.370026	1.35775	0.00949062	0.144994	0.124542	9557	tags=58%, list=51%, signal=28%	SYNPO2L/FRMD7/ARHGEF18/TGFB3/CGNL1/PAK1/CARMIL1/EPHA1/ARHGAP6/FHOD1/DLC1/ARHGEF10/TSC1/PTK2B/ARRB1/CLASP2/CCDC88A/SDC4/TESK1/RHOC/NF2/TACSTD2/KCTD13/ITGB1BP1/RAC1/NRP1/STMN1/PDLIM1/ELN/CUL3/ALMS1/ITGB5/SORBS1/ARHGAP28/SERPINF2/PPM1F/INPP5K/PAK2/TGFBR1/SRC/LIMCH1/S100A10/PPP1R9A/PFN2/SRF/PHACTR1/CLASP1/S1PR1/WASF2/ROCK2/RAPGEF3/ARHGEF10L/SFRP1/CDC42/ASAP3/TMEFF2/LIMK1
GOBP_VESICLE_MEDIATED_TRANSPORT_TO_THE_PLASMA_MEMBRANE	GOBP_VESICLE_MEDIATED_TRANSPORT_TO_THE_PLASMA_MEMBRANE	86	0.374485	1.36055	0.00949062	0.144994	0.124542	9190	tags=64%, list=49%, signal=33%	STX1B/GRIP2/AMN/BBS2/BBS1/VPS39/PKDCC/STEAP2/ARFGEF2/CCDC93/EXOC4/CCDC22/VAMP5/CNST/GOPC/SNX17/SNX27/GOLGA7/VPS29/RABEP1/EXOC2/VAMP3/GGA1/EXOC6/RAB11B/EXOC6B/NSF/EXOC8/GOLPH3/OSBPL5/RAB10/EXOC5/EXOC1/LYPLA1/SPTBN1/GOLPH3L/ANKRD27/BLZF1/VPS35/SYS1/GGA3/KRT18/RAB31/SLC1A1/SNX31/RAB26/SEC16A/AKAP5/GOLGA4/MICALL1/ANKRD50/GRIP1/VPS26A/VAMP2/STXBP6
GOBP_MEMBRANE_PROTEIN_PROTEOLYSIS	GOBP_MEMBRANE_PROTEIN_PROTEOLYSIS	60	0.398417	1.4059	0.00950962	0.144994	0.124542	8686	tags=63%, list=47%, signal=34%	TMPRSS6/TIMP4/PRKCQ/GPLD1/TNF/SNX33/ADAM9/MBTPS1/CLPP/NRDC/BACE2/NCSTN/ADAM17/MMP7/AFG3L2/PSEN1/RHBDD1/HM13/ADAM10/ERAP1/APH1A/TIMP2/SNX9/MYH9/RBMX/TNFRSF1B/PACSIN3/RELA/LRIG2/APOE/ADRA2A/BACE1/NFKB1/MBTPS2/SH3D19/SPPL2A/IFNG/SPPL2B
GOCC_TRANS_GOLGI_NETWORK_TRANSPORT_VESICLE	GOCC_TRANS_GOLGI_NETWORK_TRANSPORT_VESICLE	31	0.465566	1.51659	0.00962524	0.145981	0.12539	6469	tags=58%, list=35%, signal=38%	SYNRG/AP1G2/NRGN/RAB27B/AP1S1/STEAP2/RASSF9/CLTB/TMED10/GOPC/CLTC/SLC2A4/RAB14/RAB13/TGOLN2/SORT1/NCALD/SPG21
GOBP_PROTEIN_LOCALIZATION_TO_NUCLEUS	GOBP_PROTEIN_LOCALIZATION_TO_NUCLEUS	269	0.315029	1.22235	0.00964007	0.145981	0.12539	9561	tags=58%, list=51%, signal=29%	CHP2/RGPD1/TRIM29/RGPD3/MMP12/ABCA7/TFRC/SHH/MSX1/CARD10/PLK1/POM121/HEATR3/RGPD8/PIN1/BMP7/CABP1/MBTPS1/SP100/MEPCE/TBRG1/SUFU/HDAC3/IPO13/TSC2/CD36/CDK5/SYNE1/ECT2/LZTS2/NUP133/PARP9/OTUD7B/TMEM98/NUTF2/PSEN1/RBM22/NUP62/CTNNA1/PPP1R10/TESK1/ARL2/RASSF5/NF2/FYN/BYSL/YAP1/DCLK1/FAM53C/SYK/RAN/PRICKLE1/CD2AP/TPR/IPO8/CHP1/CBLB/KPNA3/PAF1/SKP1/TNPO2/HSP90AB1/CALR/CTDNEP1/LMNA/NUP50/TARDBP/DMAP1/BA…
GOBP_REGULATION_OF_REACTIVE_OXYGEN_SPECIES_METABOLIC_PROCESS	GOBP_REGULATION_OF_REACTIVE_OXYGEN_SPECIES_METABOLIC_PROCESS	171	0.332508	1.26745	0.00964007	0.145981	0.12539	9467	tags=60%, list=51%, signal=30%	DUOXA2/SLC30A10/PON3/SNCA/GRIN1/HBB/BRCA1/TNF/PAGE4/HVCN1/BECN1/XDH/CLEC7A/CYP1B1/BMP7/MPV17L/PPARA/PID1/PTK2B/CD36/SIRT2/PDGFB/PTGIS/NQO2/HDAC4/FYN/RAC2/SYK/TUSC2/RNF41/MAPT/GNAI3/ADGRB1/DDAH2/HSP90AB1/EGFR/PRCP/RIPK3/VDAC1/EIF6/NNT/RAC1/SOD2/PARK7/G6PD/GRB2/DHFR/GADD45A/ARF4/JAK2/FBLN5/PRKCD/CD177/GCH1/MAPK14/ROMO1/DDAH1/PIKFYVE/NFE2L2/CDKN1A/TSPO/AKR1C3/PRKN/TICAM1/TIGAR/ASS1/SOD1/DYNLL1/SIRT3…
GOBP_RESPONSE_TO_TEMPERATURE_STIMULUS	GOBP_RESPONSE_TO_TEMPERATURE_STIMULUS	218	0.324762	1.24985	0.00978953	0.147241	0.126472	9690	tags=60%, list=52%, signal=29%	PKLR/HTR1B/IL1A/NOS1/SAXO1/TRPV1/PCSK1N/CASQ1/TRPV4/PLAC8/LPL/ASIC3/GRIK2/ADRB2/HSPA1L/POM121/MICB/STAC/MAPK3/NUP210/CAMK2G/ABCC2/ACADVL/ANO1/MAP2K7/NOS3/CD14/UCP2/DNAJB1/CXCL12/TMEM135/NUP133/TRPV2/NUP62/GCLC/TPR/IRAK1/MAPT/HSPA1A/HSP90AB1/EP300/ATXN3/NUP50/DNAJA2/HTRA2/SOD2/SLC12A5/SLC52A3/VCP/RBBP7/HDAC2/TRPM2/NUP214/HIKESHI/EIF2AK4/SLC25A27/DNAJC3/PDCD6/DNAJB4/NUP37/MAPKAPK2/CREBBP/HTR2B/ACOT…
GOCC_NEURON_TO_NEURON_SYNAPSE	GOCC_NEURON_TO_NEURON_SYNAPSE	333	0.307497	1.20234	0.00978953	0.147241	0.126472	8920	tags=53%, list=48%, signal=28%	GRIN2B/NOS1/SHISA9/CACNG8/IGSF11/GRM7/GRID2/SH3GL3/SHANK1/SHISA8/GNG3/GRIA1/CHRNA3/DRD2/IQSEC3/LRFN2/TMEM108/GRIN1/SORCS2/MPP2/PSD/CAMK1/ZDHHC15/DLG4/DLG5/PRKAR1B/ADGRL1/SYNGAP1/LZTS3/MX2/GRIK2/LRRC4/CRTC1/CPEB1/PRRT1/BAALC/LRP8/PLCB4/SEMA4F/TIAM1/PRKCZ/ADORA2A/CABP1/IQSEC1/GRIN2D/EPHA4/GAP43/ADD3/EPHA7/LRFN3/NRGN/TANC1/CPEB3/CAMK2N1/TSC1/NLGN2/MINK1/FXR2/ARFGEF2/SORCS3/PTCH1/ARC/DNM1/ATP1B2/CDH2…
GOMF_ORGANIC_ACID_BINDING	GOMF_ORGANIC_ACID_BINDING	108	0.359787	1.32618	0.00978953	0.147241	0.126472	4904	tags=38%, list=26%, signal=28%	UGT1A8/GRIN2B/HBQ1/NOS1/DBH/LRAT/PADI4/GRM7/UGT1A1/NOS2/THNSL2/CYP2W1/S100A9/GRIN1/PC/HBB/MTHFS/ALOX5AP/CYP26B1/P3H3/HBA2/HBA1/OGFOD3/RARA/NOS3/PLOD1/RXRA/MCCC1/P4HTM/TYMS/P3H1/P3H2/GCLC/P4HA1/SLC19A1/GSS/PPARD/SHMT2/PAM/DBT/DHFR
GOBP_SPERM_CAPACITATION	GOBP_SPERM_CAPACITATION	26	-0.305693	-1.61441	0.00981819	0.14731	0.126532	1997	tags=46%, list=11%, signal=41%	SLC26A3/ROPN1L/CATSPER3/SLC26A8/TCP11/ELSPBP1/CATSPER4/CCR6/ROPN1/IQCF1/CATSPERZ/BSPH1
GOBP_CELL_PROLIFERATION_INVOLVED_IN_METANEPHROS_DEVELOPMENT	GOBP_CELL_PROLIFERATION_INVOLVED_IN_METANEPHROS_DEVELOPMENT	10	0.623863	1.6165	0.00986706	0.14731	0.126532	5862	tags=60%, list=31%, signal=41%	SHH/BMP7/WT1/PTCH1/STAT1/OSR1
GOBP_NADP_METABOLIC_PROCESS	GOBP_NADP_METABOLIC_PROCESS	35	0.447411	1.4803	0.00990831	0.14731	0.126532	6535	tags=54%, list=35%, signal=35%	TP53I3/RBKS/NUDT13/NUDT17/PGAM1/FMO5/KCNAB2/PGLS/FMO2/IDH1/RPIA/NNT/G6PD/IDH2/ME2/NADK2/DCXR/PGD/TIGAR
GOBP_REGULATION_OF_AMPA_RECEPTOR_ACTIVITY	GOBP_REGULATION_OF_AMPA_RECEPTOR_ACTIVITY	23	0.510013	1.57068	0.00993791	0.14731	0.126532	2989	tags=43%, list=16%, signal=37%	SHISA9/CACNG8/SHANK1/SHISA8/ADRB2/PRRT1/NLGN2/MINK1/ARC/SHANK2
GOBP_ACTOMYOSIN_STRUCTURE_ORGANIZATION	GOBP_ACTOMYOSIN_STRUCTURE_ORGANIZATION	184	0.332876	1.27289	0.00993898	0.14731	0.126532	10354	tags=60%, list=56%, signal=27%	NRAP/SYNPO2L/TNNT1/MYH6/MYL2/FRMD7/KLHL41/ACTA1/CASQ1/ARHGEF18/OBSCN/TGFB3/LDB3/CGNL1/TTN/PAK1/CDC42BPG/CARMIL1/EPHA1/ARHGAP6/EPB41L4A/FHOD1/DLC1/FRMD3/ARHGEF10/CIT/TSC1/CSRP2/PTK2B/FLII/ARRB1/ECT2/AKAP13/CLASP2/CCDC88A/SDC4/TESK1/RHOC/NF2/NEBL/CFL2/LMOD1/VPS4A/TACSTD2/KCTD13/CNN2/ITGB1BP1/EPB41L2/FRMD6/KRT8/RAC1/MYH9/NRP1/TMOD1/CNN3/STMN1/SIX4/PDLIM1/MEF2A/ELN/CUL3/ALMS1/ITGB5/SORBS1/ARHGAP28/CD…
GOMF_RIBONUCLEASE_ACTIVITY	GOMF_RIBONUCLEASE_ACTIVITY	104	0.363602	1.33876	0.00993898	0.14731	0.126532	8891	tags=63%, list=48%, signal=33%	ERN2/SLFN13/ZC3H12B/CNOT1/SMG6/USB1/AZGP1/RNASEK/ZC3H12C/ZC3H12D/RNASEL/RNASEH2A/TOE1/NYNRIN/RNASEH1/TSEN34/DIS3L2/RPP30/ENDOU/RPP21/DCPS/CPSF3/POP4/ENDOV/ERN1/DICER1/RIDA/CNOT6/SND1/ISG20/DBR1/CNOT6L/ANGEL2/TSNAX/ERI2/AGO3/RCL1/YBEY/PARN/EDC3/APEX1/ELAC2/RNASE1/PDE12/TSN/PPP1R8/EXOSC4/REXO2/TSEN2/PNPT1/FEN1/ISG20L2/EXOSC3/PIWIL1/POP1/MRPL44/RNASET2/RPP38/ZC3H12A/ANGEL1/RPP40/SAMHD1/NOB1/NUDT16/K…
GOBP_NEGATIVE_REGULATION_OF_NF_KAPPAB_TRANSCRIPTION_FACTOR_ACTIVITY	GOBP_NEGATIVE_REGULATION_OF_NF_KAPPAB_TRANSCRIPTION_FACTOR_ACTIVITY	81	0.381988	1.37842	0.00994892	0.14731	0.126532	8764	tags=56%, list=47%, signal=30%	NLRP2B/NOD2/NLRP12/CDKN2A/NLRP3/NLRC3/CYP1B1/BMP7/NWD1/TRIM21/CCDC22/ARRB1/ERBIN/IRAK3/PTGIS/FAF1/CHP1/IRAK1/RBCK1/PYCARD/COMMD7/ANXA4/CACTIN/ZNF675/IRAK2/USP7/MTURN/PIAS4/TMSB4X/G3BP2/TAX1BP1/DAP/NFKBIB/CARD8/NFKBIA/LRRC14/PELI1/PARP10/DDIT3/ZC3H12A/PKHD1/NFKBIL1/CD200/COMMD6/TRAF3
GOBP_MONONUCLEAR_CELL_DIFFERENTIATION	GOBP_MONONUCLEAR_CELL_DIFFERENTIATION	388	0.30132	1.18339	0.0100884	0.148387	0.127456	8726	tags=52%, list=47%, signal=28%	AIRE/IL1A/CCR9/IL1RL2/IL31RA/CR2/DHRS2/KLRC1/CD19/IL6/IL23A/CCR2/MS4A1/NLRP3/NHEJ1/LAG3/FOXN1/MYB/ITGB8/CD3G/TCIRG1/SHH/CYP26B1/PIK3CD/ZAP70/IRF8/KIT/LILRB1/ERBB2/PRKCZ/LY9/BTK/CTLA4/UBD/GPR68/RHOH/DCLRE1C/BLNK/PRDM1/ADA/VSIR/PNP/ZFP36L1/STAT5B/TSC1/LGALS9/CDH17/IL4R/RARA/MAFB/AGER/FNIP1/PTK2B/ZBTB7B/AP3D1/IL6R/SART1/ADAM17/TMEM176B/INPP5D/PPP2R3C/CDK6/TMEM98/PLCG2/NOTCH2/PSEN1/HDAC4/CSF1R/HDAC5/…
GOBP_POSITIVE_REGULATION_OF_MONONUCLEAR_CELL_MIGRATION	GOBP_POSITIVE_REGULATION_OF_MONONUCLEAR_CELL_MIGRATION	63	0.395974	1.40514	0.0100884	0.148387	0.127456	7582	tags=54%, list=41%, signal=32%	S100A14/S100A7/DEFB124/CCR2/TNF/CD99L2/LGMN/LGALS9/AGER/PTK2B/CREB3/ADAM17/CXCL12/OXSR1/TNFRSF14/WNK1/ADAM10/PYCARD/CALR/CCL21/CXCL13/SELENOK/CCL20/CCL4/DOCK8/MOSPD2/STK39/CXCL10/SERPINE1/CXCL14/PDGFD/JAM2/XCL2/APP
GOBP_REGULATION_OF_GTPASE_ACTIVITY	GOBP_REGULATION_OF_GTPASE_ACTIVITY	470	0.296711	1.17311	0.0100884	0.148387	0.127456	10229	tags=57%, list=55%, signal=27%	RGPD1/ARHGAP40/EPHA5/RGS6/CCL23/ADGRB3/NGEF/RASA4/RGPD3/ARHGAP22/CCL26/NTRK3/GRHL3/PLXNA3/CCL8/APC2/DEPDC1B/SYNGAP1/ARHGAP11B/RASGRP1/TBC1D3B/CCL22/ALS2CL/RIPOR2/ARHGAP30/ERBB2/GMIP/CHM/EPHA1/BCAS3/RGPD8/ARHGAP6/TIAM1/AJUBA/GPSM1/TBC1D4/PIN1/IQSEC1/RHOH/FGD2/CCL25/TBC1D2B/CCL24/AGAP9/ACAP3/EPHA4/DLC1/ARHGEF10/TBC1D2/STXBP5L/SEC23B/TSC1/TBC1D9B/RGS12/EVI5/SGSM3/TBC1D10A/RASAL3/GNAO1/GIT2/RAB11FIP2…
GOBP_NUCLEOBASE_CONTAINING_COMPOUND_TRANSPORT	GOBP_NUCLEOBASE_CONTAINING_COMPOUND_TRANSPORT	245	0.315409	1.21946	0.0102379	0.148812	0.127822	9965	tags=60%, list=53%, signal=28%	NXF3/CALHM1/IGF2BP3/RBFOX1/SLC28A1/ABCC11/DDX25/MX2/SMG6/DHX38/POM121/SLC35E3/NUP210/SLC25A4/KIF5C/ZFP36L1/MCM3AP/TSC1/TOMM20L/SENP2/ARC/SLC29A3/IWS1/SLC29A2/SYMPK/LSG1/PARP11/CPSF4/THOC1/NOP9/NUP133/XPO5/TERF2/NUTF2/UPF1/SLC35C2/NUP62/SRSF5/RIOK2/CPSF3/SLC19A1/MYO1C/FIP1L1/RAN/TPR/SLC33A1/AGFG1/RNPS1/SMG7/SLC17A9/CPSF6/SLC25A19/SARNP/SETD2/NUP50/EIF6/CPSF2/EIF5A/SLC25A36/CETN2/UPF2/NXF1/NUP214/S…
GOBP_REGULATION_OF_SYNAPSE_ASSEMBLY	GOBP_REGULATION_OF_SYNAPSE_ASSEMBLY	91	0.374897	1.36732	0.0102379	0.148812	0.127822	8602	tags=58%, list=46%, signal=32%	IL1RAPL2/LRRTM1/AMIGO3/CHRNB2/LRTM2/GRID2/SLIT1/ADGRB3/FLRT3/SNCA/NTN1/LRRN3/DLG5/IL1RAPL1/GPC6/BHLHB9/EPHA7/LRFN3/NLGN2/TLR2/LRFN1/SEMA4D/ADGRL2/SETD5/ADGRB1/EEF2K/CUX2/NTNG2/SYNDIG1/NRXN1/BDNF/EIF4G1/LRRTM2/SIX4/SLITRK5/SRPX2/IL1RAP/LHFPL4/PTPRD/VPS35/ASIC2/PDLIM5/ROBO2/AMIGO2/UBE2V2/PPP1R9A/APP/CBLN2/EPHB2/RAB17/SEMA4A/WNT3A/SLITRK4
GOBP_RIBONUCLEOPROTEIN_COMPLEX_SUBUNIT_ORGANIZATION	GOBP_RIBONUCLEOPROTEIN_COMPLEX_SUBUNIT_ORGANIZATION	191	0.331143	1.26843	0.0102379	0.148812	0.127822	10644	tags=68%, list=57%, signal=29%	SMN2/EIF3CL/NOL3/CELF4/TFIP11/RBM5/TARBP2/RPL3L/EIF3G/DHX30/SART1/PIH1D2/NLE1/PRPF6/AGO1/EIF2S2/SF3A3/PRPF3/CD2BP2/PRPF19/SRSF5/EIF4H/MRPS7/RPS10/SCAF11/GEMIN8/SETX/STRAP/RUVBL2/ISY1/DICER1/CPSF6/DDX20/HSP90AB1/MCTS1/USP39/ABT1/DYRK3/TRAF7/EIF6/EIF3I/NUDT21/AGO3/SRPK1/VCP/EIF2D/LSM4/RPL3/RBMX/PRPF8/RPS27/DENR/SF3B1/EIF5/RPS28/RPL23A/NCBP1/GEMIN6/BRIX1/SART3/PRPF39/RPS19/SNRPF/RPL11/RPL5/SRPK2/SNR…
GOCC_POSTSYNAPTIC_MEMBRANE	GOCC_POSTSYNAPTIC_MEMBRANE	251	0.31607	1.22361	0.0102379	0.148812	0.127822	3420	tags=29%, list=18%, signal=24%	CHRNB4/GRIN2B/LRRTM1/CHRNB2/SHISA9/PCDH8/CACNG8/CHRM2/CHRNA7/GRM7/GRID2/TRPV1/SHANK1/SHISA8/GRIA1/LRRTM4/CHRNA3/FLRT3/KCNC2/DRD2/LRFN2/GABRA3/KCTD16/KCTD8/GRIN1/P2RX1/TENM2/SORCS2/CHRNA6/GABRD/CDH10/GRIA3/DLG4/ANK2/ANK1/GABBR1/MX2/IL1RAPL1/GRIK2/SNTA1/LRRC4/DAGLB/ABHD6/PRRT1/SEMA4F/TIAM1/ADORA2A/SLC6A11/GRIN2D/EPHA4/EPHA7/LRFN3/NRGN/GABRB2/NLGN2/SORCS3/ARC/CHRNA10/DNM1/CDH2/ARRB1/SLC30A1/SYNE1/RG…
GOMF_NON_MEMBRANE_SPANNING_PROTEIN_TYROSINE_KINASE_ACTIVITY	GOMF_NON_MEMBRANE_SPANNING_PROTEIN_TYROSINE_KINASE_ACTIVITY	46	0.425461	1.46033	0.0102687	0.148812	0.127822	7574	tags=59%, list=41%, signal=35%	WEE2/BMX/ZAP70/TXK/BTK/PKDCC/PTK2B/FER/STK16/FYN/SYK/CLK1/DYRK1A/FGR/LCK/JAK2/PRKCD/JAK1/LYN/JAK3/FRK/SRC/RIPK2/BAZ1B/ABL2/ITK/EIF2AK2
GOCC_TRANS_GOLGI_NETWORK_MEMBRANE	GOCC_TRANS_GOLGI_NETWORK_MEMBRANE	88	0.368462	1.34035	0.0103874	0.148812	0.127822	8428	tags=49%, list=45%, signal=27%	FUT9/COG4/AP4B1/AP1M1/AP1S1/AP1B1/SCAMP2/CABP7/COG2/COG1/VPS52/STX16/CLTC/COG7/AP4E1/VAMP3/AP4M1/ARL1/COG6/HLA-DQA1/CD74/AP1M2/SCAMP1/COG5/HLA-DRB1/RAB6A/MYO1B/ST3GAL1/TMEM79/M6PR/GOLPH3L/USP6NL/HLA-DQB1/RGP1/SYS1/RAB31/ARFIP2/TEPSIN/VPS53/APP/RIC1/HLA-DRA/VPS54
GOBP_ATP_BIOSYNTHETIC_PROCESS	GOBP_ATP_BIOSYNTHETIC_PROCESS	33	0.453991	1.48982	0.0103936	0.148812	0.127822	8954	tags=73%, list=48%, signal=38%	PKLR/LDHC/PPARA/PID1/SLC25A12/UQCC3/ATP6V1A/ATP6V0C/TREM2/VCP/NUDT2/MT-ATP6/ENO1/DGUOK/TMSB4X/PRKAG2/AK9/SLC25A13/DNAJC30/STOML2/SPHK2/MT-CO2/ALDOA/PPARGC1A
GOBP_CELLULAR_RESPONSE_TO_AMYLOID_BETA	GOBP_CELLULAR_RESPONSE_TO_AMYLOID_BETA	34	0.450273	1.48241	0.0104042	0.148812	0.127822	8244	tags=68%, list=44%, signal=38%	CACNB1/ADRB2/LGMN/EPHA4/AGER/CD36/CDK5/PSEN1/FYN/TREM2/FCGR2B/ABCC1/CASP4/VCAM1/GJA1/IGF1R/IGF1/BACE1/APP/TLR4/ATP1A3/ICAM1/TLR6
GOMF_NADP_BINDING	GOMF_NADP_BINDING	52	0.406792	1.41104	0.0104186	0.148812	0.127822	8440	tags=63%, list=45%, signal=35%	NOS1/NOS2/TP53I3/FMO4/DUOX1/HSD17B1/CBR3/CRYM/NDOR1/SRD5A1/HSD11B1/NOS3/FMO5/TM7SF2/MTHFR/FMO2/IDH1/GSR/HMGCR/NNT/GAPDH/G6PD/DHFR/KCNAB1/DUS2/PGD/SPR/QDPR/CRYZ/ME3/DECR1/MTRR/DPYD
GOMF_PEPTIDE_N_ACETYLTRANSFERASE_ACTIVITY	GOMF_PEPTIDE_N_ACETYLTRANSFERASE_ACTIVITY	50	0.41033	1.41617	0.0104395	0.148812	0.127822	6216	tags=50%, list=33%, signal=33%	NAA11/TADA2A/KAT5/MCM3AP/KAT6A/TADA3/NCOA3/TAF1/NAA10/NAA16/KAT2A/BRPF1/HAT1/BRD1/EP300/NCOA1/GTF3C4/SRCAP/KAT2B/CREBBP/NAA60/NAA50/MEAF6/KAT7/EPC1
GOCC_MYELIN_SHEATH	GOCC_MYELIN_SHEATH	40	0.433272	1.46018	0.0104605	0.148812	0.127822	9276	tags=72%, list=50%, signal=37%	TUBB4A/NCMAP/ERMN/PLP1/ERBB2/PRKCZ/SRD5A1/JAM3/CNP/PLLP/GNAO1/EXOC4/SIRT2/MPP5/GDI1/TUBA1A/MARVELD2/PRKCI/DLG1/PMP2/CALM1/MOBP/CA13/CNTN2/AKR1B1/ITPR3/GJC2/HSP90AA1/MBP
GOBP_POSTSYNAPTIC_SPECIALIZATION_ASSEMBLY	GOBP_POSTSYNAPTIC_SPECIALIZATION_ASSEMBLY	21	0.506132	1.53109	0.0105303	0.148812	0.127822	6257	tags=57%, list=34%, signal=38%	LRRTM1/GRID2/SHANK1/GAP43/NLGN2/LRFN1/SHANK2/NTNG2/NRXN1/LRRTM2/IL1RAP/PTPRD
GOBP_CELL_ADHESION_MEDIATED_BY_INTEGRIN	GOBP_CELL_ADHESION_MEDIATED_BY_INTEGRIN	69	0.385972	1.37644	0.0105368	0.148812	0.127822	9752	tags=71%, list=52%, signal=34%	FOXC2/ACER2/ITGA2/MUC1/ITGB8/DPP4/CYP1B1/TESC/JAM3/ADA/ADAM9/PODXL/PLPP3/ADAM17/P2RY12/CRKL/WNK1/SYK/SWAP70/ITGB1BP1/IFT74/CCL21/CXCL13/PTPN11/RAC3/PTPN6/TGFB2/ITGB5/CD3E/LYN/SERPINE1/ITGA5/CRK/FERMT3/EXT1/EPHA8/ITGBL1/CIB1/ITGB2/ICAM1/SKAP1/FERMT1/NCKAP1L/PIK3CG/ITGB3/ITGAV/RET/VTN/ITGB6
GOBP_DEVELOPMENTAL_GROWTH_INVOLVED_IN_MORPHOGENESIS	GOBP_DEVELOPMENTAL_GROWTH_INVOLVED_IN_MORPHOGENESIS	222	0.32442	1.24919	0.0105368	0.148812	0.127822	8589	tags=51%, list=46%, signal=28%	POU4F3/DRAXIN/SYT2/SALL1/SLIT1/FLRT1/FLRT3/NTN1/TMEM108/TNN/PLXNA3/ISLR2/SHH/PAK1/SEMA4F/SYT17/SLIT3/TIAM1/PRKCZ/ULK1/EPHA7/IST1/COBL/SEMA3B/SEMA3F/ESR1/CPNE6/LRP6/SEMA4B/KDM5B/CDK5/SMURF1/CXCL12/LZTS2/AUTS2/SEMA4D/TRPV2/CDH4/SPRY1/GDI1/USP9X/RYK/NRP2/WNT3/SLC23A2/YAP1/DCLK1/LLPH/MAP1B/PPP3CB/MAPT/RNF6/HSP90AB1/LPAR3/AURKA/RTN4R/RAB21/NRP1/BDNF/MED1/EIF2AK4/SYT4/SIX4/SH3GL2/POSTN/NKD1/TBX2/SOX9/C…
GOBP_REGULATION_OF_RESPONSE_TO_DNA_DAMAGE_STIMULUS	GOBP_REGULATION_OF_RESPONSE_TO_DNA_DAMAGE_STIMULUS	207	0.325345	1.25003	0.0105368	0.148812	0.127822	9302	tags=55%, list=50%, signal=28%	SPRED3/AXIN2/BRCA1/SPIRE2/MUC1/RTEL1/MSX1/DDX11/DDIAS/HDAC10/TFIP11/POLH/IER3/RECQL5/NACC2/HELB/UBQLN4/KMT5C/OGG1/RNF168/UBE2V1/CDKN2D/CBX8/FXR2/SIRT7/FIGNL1/KLHL15/MMS19/PARPBP/CXCL12/THOC1/PARP9/ZNF385A/TERF2/RIF1/EYA3/ETAA1/PPP1R10/TMEM161A/ZNF365/PPP4R2/ING2/BRCC3/MAPT/ERCC4/ERCC1/PPP4C/MAGEF1/SETD2/EGFR/POT1/NPAS2/TRIP12/DYRK3/TERF2IP/TP53BP1/ZCWPW1/DYRK1A/SMYD2/FUS/UBR5/CEBPG/USP47/CD74/BCL…
GOBP_REGULATION_OF_SYNAPTIC_PLASTICITY	GOBP_REGULATION_OF_SYNAPTIC_PLASTICITY	171	0.331188	1.26242	0.0105368	0.148812	0.127822	9442	tags=61%, list=51%, signal=30%	SCTR/GRIN2B/SHISA9/IGSF11/CHRNA7/JPH3/NPAS4/ITPKA/CRHR2/GRID2/ERC2/SHANK1/SHISA8/CYP46A1/GRIA1/DRD2/GRIN1/SORCS2/SCGN/MPP2/DLG4/SYNGAP1/GRIK2/KIT/RASGRF2/CRTC1/ABHD6/PRRT1/KCNJ10/SYP/NFATC4/CALB2/PRKCZ/ADORA2A/LGMN/PPFIA3/GRIN2D/MAP1A/TSHZ3/EPHA4/NRGN/CPEB3/SORCS3/ARC/SERPINE2/AGER/PTK2B/CDK5/NCSTN/SHANK2/RGS14/PSEN1/SSH1/KAT2A/EGR2/MAP1B/PPP3CB/CREB1/MAPT/MME/ADGRB1/LZTS1/HRH1/YWHAG/NCDN/LRRTM2/…
GOBP_REGULATION_OF_WNT_SIGNALING_PATHWAY	GOBP_REGULATION_OF_WNT_SIGNALING_PATHWAY	352	0.308264	1.20842	0.0105368	0.148812	0.127822	10606	tags=63%, list=57%, signal=28%	TBX18/AMER3/LBX2/RSPO4/DRAXIN/SALL1/SOSTDC1/SFRP5/DKKL1/WIF1/NOTUM/SCEL/PTPRU/TLE6/KREMEN2/TNN/AMER2/AXIN2/APC2/DEPDC1B/SHH/TMEM198/TMEM88/BARX1/SPEF1/NFATC4/TIAM1/PIN1/WWOX/PSMB10/PSMC1/ESR1/GRB10/TMEM237/SENP2/LRP6/CDH2/TSC2/DCDC2/TLR2/CHD8/PLPP3/LZTS2/CSNK1G1/DAAM2/NLE1/PSEN1/MDFI/C12orf43/PSMA6/WNT3/PSME4/TMEM9/PSME2/AMFR/TBL1X/YAP1/MLLT3/WNK1/SIAH2/INVS/PRICKLE1/PSMB3/CSNK1E/RUVBL2/USP8/PSME…
GOCC_KINETOCHORE	GOCC_KINETOCHORE	133	0.345037	1.29322	0.0105368	0.148812	0.127822	9067	tags=62%, list=49%, signal=32%	TEX14/PLK1/CDT1/REC8/CENPC/DCTN1/LRWD1/DYNC1I1/CFDP1/CENPM/DYNLT3/SUGT1/NUP133/ZWINT/CLASP2/PSEN1/NEK2/SS18L1/CENPS/TPR/SPAG5/CENPA/SPC25/AURKB/PPP1CC/CENPW/ORC2/TP53BP1/KAT2B/PPP1R12A/DSN1/CENPU/CENPF/SKA2/KIF22/CENPI/ITGB3BP/SGO1/NUP37/DYNC1LI2/MAD1L1/SEH1L/RASSF2/MEAF6/DCTN5/NDE1/TTK/DYNLL1/HNRNPU/ZNF276/KNSTRN/SKA3/PELI1/CENPN/SKA1/HSF1/FBXW11/BUB3/NUP107/BOD1/APC/MAD2L1/HJURP/SIN3A/CLASP1/CK…
GOBP_DNA_DEALKYLATION_INVOLVED_IN_DNA_REPAIR	GOBP_DNA_DEALKYLATION_INVOLVED_IN_DNA_REPAIR	10	0.620351	1.6074	0.0105417	0.148812	0.127822	6042	tags=50%, list=32%, signal=34%	FTO/ASCC2/ALKBH2/ALKBH3/MPG
GOMF_4_IRON_4_SULFUR_CLUSTER_BINDING	GOMF_4_IRON_4_SULFUR_CLUSTER_BINDING	41	0.431107	1.45665	0.0106003	0.148955	0.127944	6368	tags=49%, list=34%, signal=32%	PRIM2/RTEL1/DDX11/POLD1/TYW1B/POLE/ACO2/ELP3/NDUFS8/ACO1/BRIP1/POLA1/NUBPL/CIAPIN1/REV3L/ERCC2/TYW1/ISCU/RSAD1/NTHL1
GOBP_MATURE_B_CELL_DIFFERENTIATION	GOBP_MATURE_B_CELL_DIFFERENTIATION	29	0.470135	1.50831	0.0106316	0.148955	0.127944	8823	tags=76%, list=47%, signal=40%	CD19/IL6/ADA/CDH17/PTK2B/PLCG2/NOTCH2/FCGR2B/MALT1/DLL1/CR1/ST3GAL1/GPR183/ITM2A/BCL3/DOCK10/LGALS1/ITFG2/DOCK11/POU2AF1/NKX2-3/PLCL2
GOBP_MYD88_DEPENDENT_TOLL_LIKE_RECEPTOR_SIGNALING_PATHWAY	GOBP_MYD88_DEPENDENT_TOLL_LIKE_RECEPTOR_SIGNALING_PATHWAY	35	0.445365	1.47353	0.0106647	0.148955	0.127944	8931	tags=66%, list=48%, signal=34%	TLR10/BTK/TIRAP/TLR5/CD36/TLR2/CD14/IRAK3/TAB3/IRAK1/TAB1/IRF1/LY96/IRF7/UBA52/IRAK2/HSPD1/MYD88/TLR4/TLR6/IRAK4/UBB/TLR1
GOBP_GRANULOCYTE_CHEMOTAXIS	GOBP_GRANULOCYTE_CHEMOTAXIS	120	0.351591	1.30979	0.0106863	0.148955	0.127944	9143	tags=60%, list=49%, signal=31%	CXCR1/S100A14/S100A7/CXCL5/NOD2/CCL23/S100A9/CXCR2/C5AR2/IL23A/EDN2/CCL26/CCL8/DPP4/CXCL2/MPP1/CCL22/PIK3CD/RIPOR2/MAPK3/CCL25/CCL24/JAM3/TIRAP/GBF1/IL17RC/CSF1R/RAC2/SYK/CCL2/PREX1/CXCL3/AKIRIN1/SRP54/FCER1G/C3AR1/RAC1/CCL21/CXCL13/PPIB/HRH1/MCU/LBP/CD74/CCL20/CCL4/DNM1L/PLA2G1B/TGFB2/MOSPD2/PIKFYVE/C5AR1/CXCL10/CCL19/CXCL9/PDE4B/CX3CL1/CSF1/PPIA/XCL2/CCL11/ITGB2/SLIT2/PF4V1/NCKAP1L/PIK3CG/CCL17…
GOBP_REGULATION_OF_CELL_CYCLE_G1_S_PHASE_TRANSITION	GOBP_REGULATION_OF_CELL_CYCLE_G1_S_PHASE_TRANSITION	161	0.333356	1.26572	0.0106863	0.148955	0.127944	10637	tags=67%, list=57%, signal=29%	C10orf99/CYP1A1/CDKN2A/KCNA5/MUC1/CNOT1/BRD7/CRADD/TNKS1BP1/ARID3A/NACC2/PKD1/BTG2/CDKN2D/E2F4/MEPCE/CDK4/SENP2/ID2/RBL1/TAF1/ADAM17/CARM1/CDC25C/CDK6/KANK2/ZNF385A/TRIM39/INO80/PRMT1/PSME2/PLK3/MDM4/CDK2AP2/FBXO7/PSME3/PAF1/CCL2/KMT2E/CDC6/EGFR/EP300/DDX3X/CNOT6/AURKA/UBE2E2/CNOT6L/CNOT4/APEX1/EIF4G1/GADD45A/CASP2/PTPN6/DLG1/PLCB1/LSM10/SUSD2/FHL1/PML/PCBP4/ANKRD17/RPL26/CDKN1A/CNOT3/KIF14/RB1/A…
GOMF_NUCLEASE_ACTIVITY	GOMF_NUCLEASE_ACTIVITY	191	0.330558	1.26619	0.0106863	0.148955	0.127944	8891	tags=55%, list=48%, signal=29%	ERN2/DNASE1L3/SLFN13/ZC3H12B/APLF/CNOT1/SMG6/POLD1/USB1/RAD9A/PELO/AZGP1/RNASEK/ZC3H12C/PMS2/POLE/DCLRE1C/ZC3H12D/RNASEL/RNASEH2A/TOE1/OGG1/NYNRIN/RNASEH1/TSEN34/FANCM/DNASE1/DIS3L2/EME2/RPP30/ENDOU/RPP21/DCPS/CPSF3/POP4/ENDOV/PLSCR1/ERN1/DICER1/RIDA/ERCC4/ERCC1/REXO1/CNOT6/SND1/ISG20/DBR1/CNOT6L/ANGEL2/G3BP1/TSNAX/ERI2/AGO3/RCL1/YBEY/PARN/EDC3/TATDN2/DXO/APEX1/ELAC2/RNASE1/REXO5/DCLRE1B/MBD4/TSE…
GOBP_PHYSIOLOGICAL_CARDIAC_MUSCLE_HYPERTROPHY	GOBP_PHYSIOLOGICAL_CARDIAC_MUSCLE_HYPERTROPHY	24	0.494635	1.53546	0.0107083	0.148955	0.127944	7253	tags=67%, list=39%, signal=41%	PI16/PAK1/PIN1/PPARA/PARP2/AKAP13/YY1/SORBS2/MAP2K4/G6PD/RGS4/IGF1/PDLIM5/RGS2/HAMP/DDX39B
GOCC_CYTOPLASMIC_REGION	GOCC_CYTOPLASMIC_REGION	244	0.316801	1.22437	0.0108357	0.150413	0.129197	8386	tags=52%, list=45%, signal=29%	TUBB4A/DNAI2/HAP1/SAXO1/RP1L1/ERC2/AGBL4/DNAAF1/DNAH10/TMEM108/DRC1/DNAH6/DLG4/DNAH2/RSPH9/GRIK2/CFAP221/DNAH5/BBS1/DNHD1/SPEF1/PRKCZ/TTLL3/PPFIA3/MAP1A/ADA/KIF5C/DCTN1/RAB27B/AP3M2/ARFGEF2/ARC/CCDC113/BBS7/GPSM2/DCDC2/AP3D1/DNAH1/CLTB/DYNC1H1/CLASP2/ATG16L1/CCDC96/DYNC2H1/TERF2/IFT57/NUMA1/KIF5A/AP3S2/BLOC1S6/DST/GABARAPL1/CCDC40/ARL6/BBS5/MAPT/CTNND1/RPGRIP1L/HIP1R/AP3M1/EPB41L2/ACTR10/AMBRA1/S…
GOMF_TASTE_RECEPTOR_ACTIVITY	GOMF_TASTE_RECEPTOR_ACTIVITY	21	-0.342003	-1.68236	0.0109804	0.151541	0.130165	1088	tags=38%, list=6%, signal=36%	TAS2R30/TAS2R50/TAS2R39/TAS1R2/TAS2R1/TAS2R8/TAS2R7/TAS2R9
GOBP_GLYCOPROTEIN_METABOLIC_PROCESS	GOBP_GLYCOPROTEIN_METABOLIC_PROCESS	390	0.302126	1.1868	0.0109852	0.151541	0.130165	9582	tags=56%, list=51%, signal=28%	GCNT7/MUC5B/FUT3/CHST9/NDST3/MUC5AC/ST8SIA3/FUT6/NCCRP1/MUC4/MUC12/ST8SIA2/GALNT8/MMP12/MUC3A/CHST8/ABCA7/GAL3ST2/ASGR1/MUCL1/B3GALT2/ACER2/CHST15/SLC51B/AQP11/GALNTL6/B3GALNT2/GALNT15/MUC1/MANBA/FUT9/B3GALT1/GALNT12/GCNT2/HBEGF/ALG10/GAL3ST4/SPOCK3/ENGASE/ST6GALNAC4/AGA/B3GNT7/NUDT14/UGGT2/MGAT3/GAL3ST1/ST6GALNAC2/B3GALT4/EGFLAM/POFUT2/ACOT8/B4GALT3/CANT1/MPDU1/PMM1/ALG6/B3GNT8/ALG11/PCSK6/DOLPP…
GOBP_POSITIVE_REGULATION_OF_ANION_TRANSPORT	GOBP_POSITIVE_REGULATION_OF_ANION_TRANSPORT	469	0.293217	1.1593	0.0109852	0.151541	0.130165	9470	tags=54%, list=51%, signal=27%	NPY2R/VIP/CHP2/IL1A/NR0B2/CYP8B1/CHRNB2/SLC38A3/LRAT/CARTPT/DRD4/PLA2G10/DRD2/ABCA7/PDZK1/RASL10B/ACHE/OR51E2/SLC51B/CAMK1/GPLD1/TGFB3/NMU/MYB/TNF/GAL/CEP131/SHH/AZIN2/CES1/TTN/PAK1/ERBB2/MYOM1/C1QTNF3/CFTR/HSPA1L/ABCB4/CETP/ABCA1/BCAS3/ABCA12/PRKCZ/ADORA2A/HFE/GPR68/SLC12A2/ITLN1/TM7SF3/LDLRAP1/ADAM9/RNASEL/CD33/ANO1/CAMK2N1/NLGN2/ABLIM3/C1QTNF1/HUWE1/PTCH1/APBB1/HDAC3/SREBF2/OXCT1/TLR2/CDK5/CXC…
GOBP_MITOTIC_SISTER_CHROMATID_SEGREGATION	GOBP_MITOTIC_SISTER_CHROMATID_SEGREGATION	158	0.336342	1.27502	0.0111346	0.152654	0.131122	8401	tags=54%, list=45%, signal=30%	TEX14/DUSP1/USP44/TTN/BECN1/PLK1/CDT1/CDCA5/REC8/CENPC/CHMP7/NCAPH/MAU2/HECW2/DIS3L2/ANAPC1/ZWINT/SMC2/NAA10/CDC26/AURKC/NEK2/TACC3/NUMA1/NUP62/CHMP5/INO80/RIOK2/ANAPC11/LCMT1/NIPBL/VPS4A/RAN/NCAPH2/TPR/IK/PRC1/SPAG5/CDC6/NCAPD2/PIBF1/AURKB/SMC5/EML4/PSMG2/DSN1/CHMP1B/CENPF/KPNB1/KIF22/CDCA8/SGO1/MAD1L1/CDC23/CUL3/SEH1L/PDS5A/KIFC1/ANAPC15/POGZ/NAA50/KIF14/RB1/WRAP73/ATM/TTK/CDC16/KLHL22/NSMCE2/H…
GOBP_REGULATION_OF_EPITHELIAL_CELL_MIGRATION	GOBP_REGULATION_OF_EPITHELIAL_CELL_MIGRATION	220	0.324596	1.24941	0.0111346	0.152654	0.131122	9402	tags=54%, list=50%, signal=27%	TDGF1/FOXC2/ITGA2/GPLD1/TNF/CARD10/PIK3CD/HBEGF/RAB25/BCAS3/FGF7/ATOH8/LGMN/IQSEC1/RHOB/ADAM9/STAT5A/SP100/MAP3K3/TEK/ZNF580/NOS3/PTK2B/PLPP3/ADAM17/PDGFB/PRKD2/CLASP2/PDCD10/PLCG2/NRP2/HDAC5/TACSTD2/STRAP/PTPRG/ADGRB1/KRIT1/ITGB1BP1/TBXA2R/SERPINF1/CEACAM1/CALR/EPPK1/PRCP/FOXP1/RAC1/PIK3C2A/CXCL13/NRP1/SASH1/GPI/VEGFC/MAP4K4/GADD45A/RREB1/AAMP/PDCD6/JUP/ETS1/SRPX2/TGFB2/SOX9/GLUL/DNAJA4/PRKD1/TM…
GOCC_MITOTIC_SPINDLE	GOCC_MITOTIC_SPINDLE	153	0.342515	1.29692	0.0111346	0.152654	0.131122	9129	tags=59%, list=49%, signal=31%	CXCR2/IL17RB/PLK1/DCTN1/TADA3/RMDN3/HDAC3/FAM161A/GPSM2/DCDC2/SIRT2/HECW2/ECT2/CLASP2/TACC3/NUMA1/NUP62/CLTC/STAG1/TMEM9/KAT2A/TBL1X/TPR/IK/PRC1/SPAG5/CDC6/AURKA/AURKB/SMC3/EML2/CAPG/EML4/GOLGA2/CEP170/CDC7/MAP4/HAUS4/PHLPP2/YPEL5/KIF22/RPS3/TPPP/MAP9/MAD1L1/CUL3/KIFC1/RCC2/HNF4G/EFHC2/TOGARAM2/TOGARAM1/WRAP73/CCSAP/NGRN/CDC14A/HAUS6/DYNLL1/CDC16/GEM/KIF20B/MAK/KLHL22/HNRNPU/KNSTRN/SKA3/KATNA1/NU…
GOMF_DIPEPTIDYL_PEPTIDASE_ACTIVITY	GOMF_DIPEPTIDYL_PEPTIDASE_ACTIVITY	10	0.614598	1.5925	0.0112164	0.153283	0.131662	7095	tags=90%, list=38%, signal=56%	DPP4/DPP3/PRSS16/DPP7/DPP8/PRCP/CTSC/FAP/NAALAD2
GOBP_NONRIBOSOMAL_PEPTIDE_BIOSYNTHETIC_PROCESS	GOBP_NONRIBOSOMAL_PEPTIDE_BIOSYNTHETIC_PROCESS	18	0.51792	1.51979	0.0112363	0.153283	0.131662	6850	tags=61%, list=37%, signal=39%	GGT6/GGT7/AASDH/GCLC/GSS/CNDP2/OPLAH/NFE2L2/GCLM/HAGH/CHAC2
GOBP_ORGANIC_HYDROXY_COMPOUND_TRANSPORT	GOBP_ORGANIC_HYDROXY_COMPOUND_TRANSPORT	249	0.318327	1.23196	0.0112841	0.153283	0.131662	7071	tags=43%, list=38%, signal=27%	APOA5/SLC5A8/SYT10/HTR1B/NPY2R/VIP/NOS1/NR0B2/CYP8B1/CHRNB2/ABCC11/CARTPT/DRD4/SYT2/PLA2G10/DRD1/AQP10/CYP7A1/SLC10A6/FFAR3/DRD2/SNCA/ABCG4/ABCA7/GRAMD1B/ADRA2B/P2RX1/APOB/SLC51B/AQP11/LCAT/OSBP2/MYB/STARD5/GAL/SLC10A4/SHH/ASIC3/CES1/LILRB1/CFTR/ABCB4/CETP/ABCA1/ABCA12/SYT17/ADORA2A/LDLRAP1/ABCC2/SLC5A11/C1QTNF1/PTCH1/LRP6/KDM5B/SREBF2/CD36/OSBPL3/CNR1/RXRA/APOC2/CXCL12/NAXE/ABCA5/P2RY12/STARD4/N…
GOBP_POSITIVE_REGULATION_OF_PHAGOCYTOSIS	GOBP_POSITIVE_REGULATION_OF_PHAGOCYTOSIS	61	0.394173	1.3958	0.0112841	0.153283	0.131662	9449	tags=62%, list=51%, signal=31%	SFTPD/NOD2/ABCA7/AZU1/ITGA2/SIRPB1/TNF/CLEC7A/C4B/LMAN2/CD36/TULP1/CCL2/PYCARD/TREM2/CALR/FCER1G/FCGR2B/PTPRC/SOD1/MYO18A/F2RL1/IL2RG/C4A/RAB31/IL2RB/RAPGEF1/SIRPG/PPARG/LYAR/IFNG/NCKAP1L/PTPRJ/IL15RA/MERTK/CYBA/GATA2/APPL2
GOMF_DEATH_RECEPTOR_ACTIVITY	GOMF_DEATH_RECEPTOR_ACTIVITY	12	0.605116	1.62996	0.0113114	0.153283	0.131662	5475	tags=58%, list=29%, signal=41%	EDA2R/TNFRSF25/TNFRSF4/TNFRSF14/TNFRSF1B/TNFRSF10A/FAS
GOBP_NEGATIVE_REGULATION_OF_CELL_ADHESION_MEDIATED_BY_INTEGRIN	GOBP_NEGATIVE_REGULATION_OF_CELL_ADHESION_MEDIATED_BY_INTEGRIN	11	0.612707	1.61678	0.0113339	0.153283	0.131662	6329	tags=73%, list=34%, signal=48%	ACER2/MUC1/CYP1B1/JAM3/WNK1/SWAP70/PTPN11/SERPINE1
GOBP_DETOXIFICATION	GOBP_DETOXIFICATION	122	0.349422	1.30302	0.0114335	0.153283	0.131662	7312	tags=48%, list=39%, signal=29%	MT1B/MPO/SLC30A10/HBQ1/DUOX2/AKR1B10/MT1M/EPX/S100A9/ADH4/PDZK1/GSTA1/SRXN1/AKR7A3/SLC15A2/GSTM2/DUOX1/HBB/GPX2/ALOX5AP/HBA2/HBA1/RDH11/BMP7/ABCC2/TXNRD2/NOS3/MGST3/CD36/SESN1/SLC30A1/FANCC/GSTM3/GPX4/PXDN/GPX1/GSR/NNT/SOD2/PRDX1/PARK7/RALBP1/DHFR/PRDX3/FBLN5/GCH1/NFE2L2/APOE/TXNDC17/SOD1/ESD/SELENOW/SESN2/IPCEF1/SLC22A18/ABCG2/PIM1/TXN
GOBP_REGULATION_OF_MUSCLE_CELL_DIFFERENTIATION	GOBP_REGULATION_OF_MUSCLE_CELL_DIFFERENTIATION	130	0.341184	1.27659	0.0114335	0.153283	0.131662	9609	tags=62%, list=52%, signal=30%	TCF23/CEACAM5/NRG1/FGF9/CDH15/CAMK1/PI16/PLPP7/SHH/TBX1/MSX1/ZBED6/CYP26B1/PAK1/KIT/PIN1/NFATC3/DMPK/TARBP2/MAMSTR/SMARCD3/PPARA/PARP2/ID2/CDH2/ENG/PDGFB/CTNNA1/HDAC4/HDAC5/KAT2A/MAPK12/MEGF10/PIAS1/YY1/SOD2/FBXO22/G6PD/NFATC2/BDNF/DLL1/TMEM119/SIK1/MEF2A/OLFM2/MAPK14/FOXO4/SETD3/GPER1/ANKRD17/RGS4/DNMT1/HDAC9/SHOX2/IGF1/BOC/TCF3/BMP4/RGS2/HAMP/SMAD4/DDX39B/RBM4/CTNNA2/SRF/MORF4L2/MED28/MESP1/FRS…
GOBP_STEROL_METABOLIC_PROCESS	GOBP_STEROL_METABOLIC_PROCESS	153	0.341837	1.29435	0.0114335	0.153283	0.131662	9855	tags=61%, list=53%, signal=29%	APOA5/NR0B2/CYP8B1/CYP7A1/CYP46A1/HMGCS2/APOB/LCAT/FDX2/APOF/SEC14L2/CYP51A1/INSIG1/CES1/CYP26B1/APOBR/CFTR/INSIG2/CETP/ERLIN2/GPAM/ABCA1/SULT2B1/CYP1B1/ACADL/FDPS/LDLRAP1/ACADVL/SCD/MBTPS1/PMVK/NFE2L1/FMO5/SREBF2/TM7SF2/AKR1D1/RXRA/FDXR/PRKAA2/SNX17/CLN6/NFYB/RAN/SMPD1/VLDLR/PPARD/GBA2/HMGCR/G6PD/HDLBP/CYB5R3/KPNB1/MVD/OSBPL1A/NFYC/SCARB1/SP1/OSBPL5/FASN/PRKAG2/LEPR/NSDHL/ELOVL6/CYP4V2/APOL2/APO…
GOBP_STRESS_ACTIVATED_PROTEIN_KINASE_SIGNALING_CASCADE	GOBP_STRESS_ACTIVATED_PROTEIN_KINASE_SIGNALING_CASCADE	267	0.316184	1.22613	0.0114335	0.153283	0.131662	10285	tags=63%, list=55%, signal=29%	SERPINB3/ERN2/NOD2/EDA2R/KLHL31/RELL1/RELL2/DUSP1/TNF/SPHK1/PAGE4/GRIK2/RASGRP1/NPPA/PAK1/XDH/MAPK10/MAPK3/CLEC7A/TLR3/MAP3K3/ZFP36L1/UBE2V1/MAP2K7/TIRAP/MINK1/LGALS9/MECOM/HDAC3/AGER/PTK2B/MAP3K4/MAPK8IP1/PDCD10/DUSP3/GPS1/MAGI3/CRKL/PAK4/TAOK3/PRMT1/TAB3/SYK/MAP4K5/MEN1/IRAK1/ERN1/TAB1/HIPK2/SKP1/EGFR/PYCARD/ANKRD6/DUSP19/MAP3K10/PTPN1/FCGR2B/CCL21/MAP2K4/SASH1/MAPK13/MDFIC/MAP4K4/GADD45A/HIPK3…
GOCC_PIGMENT_GRANULE	GOCC_PIGMENT_GRANULE	105	0.360884	1.32858	0.0114335	0.153283	0.131662	9088	tags=61%, list=49%, signal=31%	TH/DCT/GCHFR/TFRC/MREG/GGH/RAB5C/CNP/RAB27B/RAB35/SYTL1/RAB32/P4HB/NCSTN/PDIA4/TMED10/TRPV2/CLTC/RAN/SYTL2/ATP6V0A1/CALU/ANXA2/HSP90AB1/SERPINF1/SND1/RPN1/SEC22B/CAPG/RAC1/GNA13/PRDX1/PPIB/TMEM33/STOM/YWHAB/CANX/ATP1B3/NAP1L1/PDIA3/ANXA11/SDCBP/HSP90B1/RAB2A/MYRIP/FASN/SYPL1/DNAJC5/AHCY/ANKRD27/YWHAE/CCT4/ATP6V1G2/SLC45A2/TYRP1/RAB5A/PMEL/RAB17/ATP1A1/OCA2/HSP90AA1/ITGB3/LAMP1/CTSD
GOBP_NEGATIVE_REGULATION_OF_BLOOD_PRESSURE	GOBP_NEGATIVE_REGULATION_OF_BLOOD_PRESSURE	39	0.441411	1.48189	0.0115257	0.153588	0.131924	6818	tags=59%, list=37%, signal=37%	ADRB3/NOS1/NOS2/FFAR3/DRD2/GPR37L1/NPPA/ADRB2/KCNK6/SCPEP1/PPARA/NOS3/CNR1/SNX5/PRCP/SOD2/VEGFC/ADM2/GCH1/PTAFR/GJA5/BDKRB1/RNLS
GOBP_I_KAPPAB_KINASE_NF_KAPPAB_SIGNALING	GOBP_I_KAPPAB_KINASE_NF_KAPPAB_SIGNALING	274	0.313238	1.21661	0.011583	0.153588	0.131924	10064	tags=59%, list=54%, signal=27%	NOD2/DEFB124/EDA2R/NLRP12/OTUD7A/TRIM34/TRIM6/TNFSF10/TLR7/TFRC/TNF/MIB2/NLRC3/TBKBP1/AJUBA/BTK/UBD/IRF3/RHOH/TLR3/MAP3K3/UBE2V1/NLRX1/ESR1/TRIM22/TIRAP/S100A4/LGALS9/TRIM21/CANT1/ALPK1/IFIT5/CD36/CCDC22/TLR2/CD14/MID2/ECT2/AKAP13/OTUD7B/TRIM39/CARD16/SLC20A1/NUP62/RHOC/PPP5C/FYN/CD4/TAB3/TMEM9B/IRAK1BP1/RNF31/ECM1/IRAK1/RBCK1/TAB1/JMJD8/PYCARD/TRIM27/RIPK3/TERF2IP/CCL21/FAIM/CACTIN/MALT1/LY96/GO…
GOBP_REGULATION_OF_MICROTUBULE_BASED_PROCESS	GOBP_REGULATION_OF_MICROTUBULE_BASED_PROCESS	218	0.321802	1.23846	0.011583	0.153588	0.131924	10877	tags=66%, list=58%, signal=28%	CEP295NL/C10orf90/TUBB4A/HAP1/TAC4/TRIM54/SEMG1/SNCA/DNAAF1/DRC1/TACR1/TRPV4/FSD1/BRCA1/BBS2/APC2/CENPJ/CEP131/TTLL6/PAK1/ERBB2/PLK1/SPEF1/SEMG2/INPP5J/MAP1A/PKD1/DCTN1/MDM1/FBXW5/RASSF1/KLHL42/GPSM2/MARK4/PRKAA2/DYNC1H1/CLASP2/TACC3/NUMA1/NUP62/CHMP5/CLTC/MID1IP1/ARL2/KAT2A/CDK2AP2/CHMP3/CCDC40/TPR/CDH5/MAP1B/GAS2L1/SPAG5/MAPT/HSPA1A/GBA2/AURKA/KAT2B/EML2/DYRK1A/RAC1/NAT10/CHMP1B/SKA2/STMN1/CCDC…
GOCC_NEURON_SPINE	GOCC_NEURON_SPINE	176	0.33065	1.26195	0.011583	0.153588	0.131924	7777	tags=50%, list=42%, signal=29%	NOS1/SHISA9/HAP1/ITPKA/GRID2/DRD1/TRPV1/SHANK1/SHISA8/FRMPD4/GRIA1/DRD2/GRIN1/TENM2/SORCS2/MPP2/PSD/GRIA3/DLG4/LZTS3/MX2/ZNF804A/LRRC4/TIAM1/EPHA4/KCNN2/NRGN/FXR2/ARFGEF2/ARC/DNM1/PTK2B/ARRB1/APBA3/TANC2/DNAJB1/SYNPO/SHANK2/RGS14/MTMR2/KCND3/NEDD4/ZMYND8/MAP1B/PPP1R1B/USP8/MAPT/CTNND1/ADAM10/ADGRB1/LZTS1/EEF2K/HIP1R/PPP1CC/ITSN1/ABR/FCGR2B/RAC1/SYNDIG1/CNN3/STRN/APBA1/APBA2/PSMC2/ITGA8/ARF4/RGS10…
GOCC_UBIQUITIN_LIGASE_COMPLEX	GOCC_UBIQUITIN_LIGASE_COMPLEX	282	0.312413	1.21422	0.011583	0.153588	0.131924	11011	tags=66%, list=59%, signal=28%	DCAF12L1/FBXO39/NCCRP1/KLHL41/ASB12/KLHL3/FEM1A/BRCA1/KLHL20/MIB2/CDC20B/FBXO10/GAN/RANBP10/PHC1/UBE2S/ASB1/DDB2/CUL9/ZSWIM4/FBXO32/RING1/FBXO11/DTL/RNF168/UBE2V1/AMN1/CBX8/DCAF4/TRIM21/FBXL20/FBXW5/WDTC1/KLHL15/KLHL42/MED18/DCAF11/KCTD10/SUGT1/ANAPC1/FBXO21/FBXO25/CDC26/RAD18/MED7/DDB1/FBXL12/MAEA/KLHL7/ANAPC11/AMFR/BCOR/RNF31/NEDD4/FBXO7/UBE2A/PHC2/BRCC3/PEF1/RBCK1/KLHL9/KLHL21/CRBN/KCTD13/RNF1…
GOCC_TRANSCRIPTION_REPRESSOR_COMPLEX	GOCC_TRANSCRIPTION_REPRESSOR_COMPLEX	72	0.386288	1.38205	0.0115946	0.153588	0.131924	8100	tags=58%, list=43%, signal=33%	TBX18/PRDM16/INSM2/ETV3/HDAC3/REST/CHD3/ARID4A/CORO2A/HDAC4/MBD3/TBL1X/GATAD2B/GATA1/JAZF1/CSNK2A1/HDGF/RBBP7/HDAC2/YWHAB/N4BP2L2/DR1/RBBP8/HDAC1/MTA1/TFAP4/MTA3/MIER1/SP1/ZBTB16/CTBP2/SP3/RELB/DEPDC1/ZFPM1/GLI3/LIN9/SIN3A/PRDM10/CCND1/MTA2/RLIM
GOCC_SPLICEOSOMAL_COMPLEX	GOCC_SPLICEOSOMAL_COMPLEX	183	0.327079	1.24992	0.0117325	0.154005	0.132282	9501	tags=56%, list=51%, signal=28%	DQX1/DHX38/GPKOW/TFIP11/RBM5/SREK1/SRRM2/PPIL1/SART1/RBM28/PRPF4/SYF2/PRPF6/UPF1/CWF19L1/SNRNP35/RBM22/SF3A3/PRPF3/PRPF19/PRPF4B/PNN/IVNS1ABP/CTNNBL1/IK/ISY1/DHX32/RBMXL1/USP39/TTF2/PPIH/CACTIN/HNRNPR/RBMX2/LSM4/WBP11/RBMX/PRPF8/CWC22/WBP4/RALY/SF3B1/PPIE/YBX1/C9orf78/HNRNPF/PRPF39/SNRPF/TRA2A/LSM5/RBM8A/LSM3/PRPF38A/HNRNPA3/HNRNPA1/SNRPG/SNRPA1/CASC3/PPP1R8/SNRPB/ZNF830/FRG1/SF1/SF3B4/HNRNPM/ZMA…
GOBP_NEGATIVE_REGULATION_OF_CELL_SUBSTRATE_ADHESION	GOBP_NEGATIVE_REGULATION_OF_CELL_SUBSTRATE_ADHESION	60	0.394746	1.39295	0.0117559	0.154005	0.132282	8302	tags=50%, list=45%, signal=28%	MMP12/ACER2/AJAP1/CDKN2A/GCNT2/BCAS3/ARHGAP6/DLC1/CLASP2/RASA1/NF2/TACSTD2/FZD4/ITGB1BP1/HOXA7/MAP4K4/MELTF/POSTN/COL1A1/AP1AR/RCC2/SERPINE1/CX3CL1/SRC/BCL6/ANGPT2/CASK/KANK1/FBLN1/LGALS1
GOBP_PIGMENT_GRANULE_LOCALIZATION	GOBP_PIGMENT_GRANULE_LOCALIZATION	26	0.472168	1.49044	0.0118433	0.154005	0.132282	3893	tags=38%, list=21%, signal=30%	ASIP/BBS2/MREG/SHROOM2/RAB27B/BBS7/VPS33A/BLOC1S6/ARL6/BBS5
GOBP_ANTIGEN_PROCESSING_AND_PRESENTATION_OF_PEPTIDE_ANTIGEN	GOBP_ANTIGEN_PROCESSING_AND_PRESENTATION_OF_PEPTIDE_ANTIGEN	187	0.32869	1.25618	0.0118819	0.154005	0.132282	10475	tags=64%, list=56%, signal=28%	CD207/LAG3/ERAP2/RILP/AZGP1/HFE/LGMN/PSMB10/NCF2/PSMC1/DCTN1/AP1M1/AP2A2/AP1S1/DYNC1I1/AP1B1/HLA-C/CD36/LNPEP/DYNC1H1/AP2B1/CLTC/PSMA6/KIF5A/PSME4/PSME2/CAPZB/PSMB3/AP2M1/SNAP23/MFSD6/PSME3/FCGR1B/SEC24B/ERAP1/VAMP3/ACTR10/PYCARD/TREM2/CALR/AP2S1/PSMC6/HLA-A/FCER1G/SEC22B/FCGR2B/PSMC4/HLA-DQA1/PSMB8/KIF22/CD74/HLA-E/CANX/PSMD13/PSMC2/AP1M2/SH3GL2/HLA-DRB1/TAP2/DYNC1LI2/PSMD11/HLA-F/OSBPL1A/PSMD3/…
GOCC_NUCLEAR_CHROMOSOME	GOCC_NUCLEAR_CHROMOSOME	215	0.32268	1.24115	0.0118819	0.154005	0.132282	9163	tags=53%, list=49%, signal=28%	SYCE3/MEI4/HUS1B/SYCP2/SYCE2/BRCA1/PRIM2/ORC1/TTN/POLD1/MMS22L/PLK1/RAD9A/DMC1/POLE/POLA2/HELB/MSH5/REC8/ADD3/CENPC/KAT5/RSPH1/POLD3/RGS12/LRWD1/SAP130/SIRT7/POLD2/FIGNL1/TONSL/MLH1/TEX12/INO80C/MLH3/SMC2/SIN3B/NEK2/SMARCB1/ETAA1/INO80/PRPF19/POLA1/P3H4/SETX/IK/YY1AP1/ING2/RUVBL2/REPIN1/CENPA/MORF4L1/CPSF6/TRIM24/NCAPD2/SWI5/SRCAP/SMC3/ORC2/TERF2IP/TARDBP/DMAP1/YY1/AGO3/CSNK2A1/DSN1/HDAC2/SUDS3/H…
GOBP_SPERM_AXONEME_ASSEMBLY	GOBP_SPERM_AXONEME_ASSEMBLY	21	0.501628	1.51746	0.0119343	0.154005	0.132282	2878	tags=43%, list=15%, signal=36%	MEIG1/TPGS1/BBS2/CEP131/TTLL1/CFAP44/TTC12/SPEF2/DNAH1
GOMF_PROTEIN_TRANSMEMBRANE_TRANSPORTER_ACTIVITY	GOMF_PROTEIN_TRANSMEMBRANE_TRANSPORTER_ACTIVITY	21	0.501441	1.5169	0.0119343	0.154005	0.132282	8171	tags=76%, list=44%, signal=43%	ABCA1/AZGP1/SEC61A2/TOMM20L/SEC61G/TMED10/SEC61A1/TOMM22/TIMM17B/TOMM70/MCL1/TIMM22/SEC63/TOMM40L/TIMM17A/TIMM23
GOBP_GLIAL_CELL_DEVELOPMENT	GOBP_GLIAL_CELL_DEVELOPMENT	108	0.357916	1.31928	0.0120314	0.154005	0.132282	8653	tags=55%, list=46%, signal=29%	NCMAP/S100A9/ASCL1/IL6/TNF/PLP1/SHH/HDAC10/OLIG1/KCNJ10/ADORA2A/ARHGEF10/HDAC11/AGER/BACE2/TLR2/CDK5/SIRT2/NCSTN/MPP5/CDK6/PSEN1/ADGRG6/MAPT/DICER1/EGFR/TREM2/ERCC2/DLL1/WASF3/MYRF/TPPP/PRX/ADAM22/KRAS/C5AR1/LGI4/LYN/IFNGR1/MOBP/ASPA/CNTNAP1/NDRG1/SOD1/GRN/CLU/EIF2B5/PARD3/NR1D1/APP/SH3TC2/HES5/TLR4/SMO/NKX2-2/NSUN5/LAMC3/VIM/IFNG
GOBP_NON_CANONICAL_WNT_SIGNALING_PATHWAY	GOBP_NON_CANONICAL_WNT_SIGNALING_PATHWAY	152	0.337036	1.27535	0.0120314	0.154005	0.132282	10481	tags=64%, list=56%, signal=28%	LBX2/SFRP5/GRHL3/WNT9B/GPC6/CELSR1/SPEF1/PRICKLE2/TIAM1/FZD3/PSMB10/PSMC1/AP2A2/GNAO1/SMURF1/DAAM2/TNRC6B/TNRC6A/AGO1/AP2B1/CLTC/RYK/PSMA6/PSME4/PSME2/MLLT3/PRICKLE1/PSMB3/AP2M1/CSNK1E/PPP3CB/PSME3/FZD4/DVL2/ANKRD6/AP2S1/PSMC6/RAC1/AGO3/GNB1/RSPO3/PSMC4/PSMB8/PSMD13/PSMC2/PLCB1/NKD1/PSMD11/PSMD3/PSMB7/PSMA2/TCF7L2/PSMB1/PSMB2/CALM1/FZD5/AGO4/PSMB9/PSMD5/PSMC5/PSMD1/SMURF2/NLK/PSMC3/GNG2/VANGL1/PS…
GOBP_NUCLEAR_CHROMOSOME_SEGREGATION	GOBP_NUCLEAR_CHROMOSOME_SEGREGATION	251	0.31344	1.21343	0.0120314	0.154005	0.132282	8471	tags=51%, list=45%, signal=28%	SYCE3/MEI4/ANKRD31/TEX14/MEIOC/SYCP2/AXIN2/DUSP1/SYCE2/USP44/DDX11/TTN/BECN1/PLK1/CDT1/DMC1/CCNE1/CDCA5/REC8/CENPC/CHMP7/NCAPH/SIRT7/MAU2/FANCM/MLH1/SIRT2/TEX12/HECW2/DIS3L2/MLH3/ECT2/DYNC1H1/ANAPC1/ZWINT/SMC2/NAA10/EME2/CDC26/BRIP1/AURKC/NEK2/TACC3/NUMA1/NUP62/CHMP5/INO80/RIOK2/ANAPC11/STAG1/LCMT1/CENPS/NIPBL/VPS4A/RAN/NCAPH2/P3H4/TPR/IK/PRC1/SPAG5/ERCC4/CDC6/NCAPD2/PIBF1/AURKB/SMC3/SMC5/ZCWPW1/…
GOBP_POSITIVE_REGULATION_OF_PROTEIN_CATABOLIC_PROCESS	GOBP_POSITIVE_REGULATION_OF_PROTEIN_CATABOLIC_PROCESS	222	0.322781	1.24288	0.0120314	0.154005	0.132282	10910	tags=68%, list=59%, signal=29%	VIP/AGBL4/KCNE2/GPLD1/APC2/TNF/TRIB2/RILP/CDC20B/PLK1/HACE1/SNX33/ADAM9/PSMC1/DTL/SGSM3/HUWE1/BBS7/PTK2B/CCDC22/NRDC/SIRT2/HECW2/TAF1/SMURF1/TMTC3/LRP2/VPS11/PSEN1/DDB1/DNAJB2/HECTD1/FAF1/PLK3/PRICKLE1/OAZ2/CSNK1E/NEDD4/RNF41/SOCS4/RNF19A/CBLB/HSPA1A/MAGEF1/GGA1/ATXN3/TREM2/FAM122A/AURKA/SEC22B/SNX9/PIAS1/BARD1/FBXO22/OAZ1/CSNK2A1/VCP/ARIH1/PSMC4/TNFRSF1B/AXIN1/PSMC2/NUPR1/SUMO2/NKD1/RNF40/SOX9/N…
GOBP_POSITIVE_REGULATION_OF_REACTIVE_OXYGEN_SPECIES_METABOLIC_PROCESS	GOBP_POSITIVE_REGULATION_OF_REACTIVE_OXYGEN_SPECIES_METABOLIC_PROCESS	91	0.371873	1.3563	0.0120314	0.154005	0.132282	9467	tags=64%, list=51%, signal=32%	DUOXA2/SNCA/GRIN1/HBB/TNF/HVCN1/XDH/CLEC7A/PID1/PTK2B/CD36/PDGFB/NQO2/HDAC4/SYK/RNF41/MAPT/GNAI3/ADGRB1/DDAH2/HSP90AB1/EGFR/RIPK3/NNT/SOD2/PARK7/GRB2/GADD45A/JAK2/PRKCD/CD177/MAPK14/ROMO1/DDAH1/NFE2L2/CDKN1A/TSPO/AKR1C3/TICAM1/ASS1/SOD1/F2RL1/CLU/SLC5A3/TLR4/ITGB2/ICAM1/TYROBP/TLR6/ZC3H12A/MT-CO2/IFNG/HSP90AA1/AKT1/CLCN3/CYBA/NOS1AP/GNAI2
GOBP_REGULATION_OF_DNA_REPAIR	GOBP_REGULATION_OF_DNA_REPAIR	119	0.350425	1.30388	0.0120314	0.154005	0.132282	7476	tags=49%, list=40%, signal=29%	AXIN2/BRCA1/SPIRE2/RTEL1/DDX11/HDAC10/TFIP11/POLH/RECQL5/HELB/UBQLN4/KMT5C/OGG1/RNF168/UBE2V1/CBX8/SIRT7/FIGNL1/KLHL15/MMS19/PARPBP/PARP9/TERF2/RIF1/EYA3/TMEM161A/ZNF365/PPP4R2/BRCC3/PPP4C/MAGEF1/SETD2/EGFR/POT1/NPAS2/TRIP12/TERF2IP/TP53BP1/ZCWPW1/FUS/UBR5/CEBPG/CHEK1/WRNIP1/EYA2/RPS3/PML/NUDT16L1/TRIM28/KAT7/PARG/TIGAR/ARID2/SMCHD1/UBE2V2/FANCB/PRKDC/HSF1
GOBP_REGULATION_OF_HEMATOPOIETIC_STEM_CELL_DIFFERENTIATION	GOBP_REGULATION_OF_HEMATOPOIETIC_STEM_CELL_DIFFERENTIATION	74	0.376919	1.35104	0.0120314	0.154005	0.132282	7775	tags=58%, list=42%, signal=34%	LMO1/MYB/PSMB10/PSMC1/LDB1/OSM/PSMA6/PSME4/PSME2/YAP1/PSMB3/PSME3/OCIAD2/RUNX1/PSMC6/GATA1/OCIAD1/N4BP2L2/PSMC4/PSMB8/PSMD13/PSMC2/TCF12/PSMD11/PSMD3/PSMB7/PSMA2/NFE2L2/PSMB1/PSMB2/SETD1A/PSMB9/PSMD5/TCF3/METTL3/PSMC5/PSMD1/PRKDC/PSMC3/EIF2AK2/PSMB6/TP73/PSMA7
GOCC_MEMBRANE_MICRODOMAIN	GOCC_MEMBRANE_MICRODOMAIN	318	0.308413	1.20422	0.0120314	0.154005	0.132282	10928	tags=66%, list=59%, signal=28%	MYO1A/LY6K/NOS1/CHRNB2/ATP1A4/CHRNA7/RTN4RL1/CHRNA3/TDGF1/CD19/PDZK1/LAT/MS4A1/P2RX1/ADTRP/KCNA5/MALL/CDH15/TNF/DPP4/ADGRG1/ASAH2/SHH/ZAP70/ABCB4/BAALC/ERLIN2/LRP8/ABCA1/SLC38A9/ORAI1/HK1/PRKCZ/MAPK3/BTK/ARID3A/CAVIN4/ITLN1/DLC1/EFHD2/RTN4RL2/TEK/ANO1/PLLP/NOS3/PTCH1/ARC/LRP6/CDH2/PTK2B/CD36/CD226/TLR2/CNR1/CD14/PODXL/PLPP3/ADAM17/INPP5D/P2RY12/PTGIS/PSEN1/SDC4/CTNNA1/CLN6/FYN/CD4/MYO1C/TUBA1A/PL…
GOCC_DNA_REPAIR_COMPLEX	GOCC_DNA_REPAIR_COMPLEX	34	0.447728	1.47403	0.0120749	0.154005	0.132282	7417	tags=56%, list=40%, signal=34%	NHEJ1/POLD1/PMS2/DCLRE1C/XPC/MLH1/MLH3/MSH3/MSH2/ERCC4/ERCC1/PMS1/XRCC6/TP53BP1/CETN2/ATP23/ATM/PRKDC/LIG4
GOCC_PHOTORECEPTOR_DISC_MEMBRANE	GOCC_PHOTORECEPTOR_DISC_MEMBRANE	19	-0.351364	-1.72519	0.0121286	0.154005	0.132282	1816	tags=47%, list=10%, signal=43%	PDE6A/RHO/GRK7/GUCA1A/GUCA1C/GNAT1/OPN1MW2/OPN1LW/OPN1MW
GOBP_ACTIN_FILAMENT_BUNDLE_ORGANIZATION	GOBP_ACTIN_FILAMENT_BUNDLE_ORGANIZATION	151	0.342183	1.29471	0.0121808	0.154005	0.132282	9592	tags=56%, list=51%, signal=28%	SYNPO2L/ESPNL/FRMD7/ESPN/SHANK1/RFLNA/ARHGEF18/TGFB3/SPIRE2/CGNL1/PAK1/CARMIL1/EPHA1/ARHGAP6/BAIAP2/FSCN1/PLS1/FHOD1/DLC1/ARHGEF10/LCP1/TSC1/PTK2B/ARRB1/ID1/BAIAP2L1/SYNPO/CALD1/CLASP2/CCDC88A/SDC4/TESK1/RHOC/NF2/MARCKS/TACSTD2/SWAP70/KCTD13/ITGB1BP1/RAC1/NRP1/STMN1/PLEK/PDLIM1/ELN/PAWR/MYO1B/CUL3/ALMS1/ITGB5/SORBS1/ARHGAP28/HSP90B1/SYNPO2/SERPINF2/RFLNB/PRKN/PPM1F/CX3CL1/INPP5K/PAK2/TGFBR1/SRC/L…
GOBP_ACTIVATION_OF_IMMUNE_RESPONSE	GOBP_ACTIVATION_OF_IMMUNE_RESPONSE	432	0.296428	1.16891	0.0121808	0.154005	0.132282	9061	tags=54%, list=49%, signal=29%	HMSD/FCN2/MUC5B/MUC5AC/MASP2/BTN1A1/CR2/MUC4/NOD2/MUC12/COLEC10/CD19/C5AR2/MUC3A/PAX5/GCSAML/LAT/MUCL1/MS4A1/PRKCQ/MYH2/BTNL9/BMX/GPLD1/MUC1/CD3G/MNDA/SLC39A10/PAK1/PIK3CD/ZAP70/HHLA2/ZBP1/MICB/TXK/MAPK3/BTK/CTLA4/BAIAP2/BLNK/C4B/BTN2A1/ADA/CLEC10A/PSMB10/PSMC1/NCR3/SH2B2/NRAS/CD226/DGKZ/HEXIM1/VAV2/INPP5D/PRKD2/BTN3A3/PLCG2/DUSP3/PSEN1/ICAM2/PLA2G6/C1RL/PSMA6/CRKL/PSME4/FYN/CD4/PSME2/TAB3/MYO1C/…
GOBP_DEMETHYLATION	GOBP_DEMETHYLATION	70	0.384384	1.37348	0.0121808	0.154005	0.132282	8721	tags=61%, list=47%, signal=33%	APOBEC2/KDM4E/CYP1A1/STPG4/CYP3A5/CYP3A43/CYP3A7/CYP51A1/APOBEC3C/FTO/KDM5A/KDM5B/KDM4A/RIOX1/KDM5D/USP9X/PPME1/KDM1B/UTY/HR/JARID2/APEX1/APOBEC3A/PHF8/ALKBH2/USP7/TRIM28/OTUD4/KDM7A/ALKBH3/UBE2B/TET3/RIOX2/CYP1A2/KDM6B/KDM5C/TET2/KDM6A/TET1/KDM4C/APOBEC3H/KDM3B/HSF4
GOBP_EPITHELIAL_TUBE_MORPHOGENESIS	GOBP_EPITHELIAL_TUBE_MORPHOGENESIS	301	0.307649	1.19885	0.0121808	0.154005	0.132282	10764	tags=62%, list=58%, signal=27%	TRIM71/HOXD11/WNT6/SALL1/SOSTDC1/PAX8/FOXC2/NTN1/DNAAF1/KLHL3/GRHL3/DLG5/WNT9B/TNF/OVOL2/LAMA1/SHH/WNK4/NDRG4/PAK1/PIK3CD/CELSR1/RNF207/NFATC4/TCF21/FOXH1/FZD3/BMP7/LRP5L/ACVR1/EPHA4/RHOB/DLC1/EPHA7/PKD1/COBL/WT1/HOXA5/TSC1/ESR1/GZF1/TEAD2/SUFU/PTCH1/LRP6/KDM5B/TSC2/BBS7/PODXL/SPINT2/ENG/LZTS2/PRKD2/LRP2/NOTCH2/SPRY1/PSEN1/PLXND1/MTHFR/ITGAX/C2CD3/IFT57/SPINT1/SDC4/LAMA5/CSF1R/KAT2A/YAP1/PRICKLE1…
GOBP_HEMATOPOIETIC_STEM_CELL_DIFFERENTIATION	GOBP_HEMATOPOIETIC_STEM_CELL_DIFFERENTIATION	88	0.364384	1.32551	0.0121808	0.154005	0.132282	9348	tags=66%, list=50%, signal=33%	HOXB4/LMO1/MYB/PSMB10/PSMC1/LDB1/OSM/PSMA6/PSME4/PSME2/YAP1/MLLT3/PSMB3/PSME3/OCIAD2/RUNX1/ERCC2/PSMC6/GATA1/OCIAD1/N4BP2L2/PSMC4/PSMB8/PSMD13/PSMC2/TCF12/PSMD11/PSMD3/PSMB7/PSMA2/NFE2L2/PSMB1/PSMB2/SETD1A/PSMB9/BATF/PSMD5/TCF3/METTL3/PSMC5/PSMD1/EXT1/PRKDC/MEOX1/PSMC3/SRF/EIF2AK2/PSMB6/TP73/PSMA7/KMT2A/PUS7/PSMD14/UFL1/LMBR1L/SFRP1/PSMF1/GATA2
GOBP_REGULATION_OF_RESPONSE_TO_BIOTIC_STIMULUS	GOBP_REGULATION_OF_RESPONSE_TO_BIOTIC_STIMULUS	396	0.300242	1.18044	0.0121808	0.154005	0.132282	8971	tags=54%, list=48%, signal=29%	KLK7/MUC5B/SLC22A13/MUC5AC/NCR1/MUC4/NOD2/MUC12/DRD2/KLRC1/MMP12/MUC3A/IL23A/MUCL1/IFNLR1/TRIM6/DHX58/LAG3/IRGM/MUC1/MNDA/RASGRP1/PAK1/CD274/LILRB1/NMI/NLRC3/ZBP1/LRP8/MICB/IFIT1/TXK/MAPK3/IFI35/IRF3/COCH/TARBP2/RNASEL/CLEC10A/PSMB10/PSMC1/NLRX1/STAT5B/TIRAP/GPATCH3/LGALS9/POLR3B/RNF216/NCR3/TRIM21/POLR3F/NRAS/CD36/CD226/SIRT2/HEXIM1/PPP2R3C/PARP9/IRAK3/PLCG2/CARD16/ICAM2/ELMOD2/PSMA6/HERC5/PSME4…
GOCC_CONDENSED_CHROMOSOME_CENTROMERIC_REGION	GOCC_CONDENSED_CHROMOSOME_CENTROMERIC_REGION	113	0.352594	1.30517	0.0121808	0.154005	0.132282	9067	tags=63%, list=49%, signal=32%	TEX14/PLK1/CDT1/REC8/CENPC/KMT5C/LRWD1/DYNC1I1/CFDP1/CENPM/DYNLT3/NUP133/ZWINT/CLASP2/NEK2/SS18L1/CENPS/SPAG5/CENPA/SPC25/NCAPD2/AURKB/PPP1CC/CENPW/ORC2/TP53BP1/DSN1/CENPU/CENPF/SKA2/ITGB3BP/SGO1/NUP37/MAD1L1/SEH1L/RASSF2/MEAF6/SYCP2L/DCTN5/CBX3/NDE1/HNRNPU/ZNF276/KNSTRN/SKA3/PELI1/CENPN/SKA1/HSF1/BUB3/NUP107/BOD1/MAD2L1/HJURP/CLASP1/CKAP5/BOD1L1/SPDL1/PMF1/MIS12/CENPO/ERCC6L/BUB1B/MIS18BP1/FBXO2…
GOBP_REGULATION_OF_POSTSYNAPSE_ORGANIZATION	GOBP_REGULATION_OF_POSTSYNAPSE_ORGANIZATION	84	0.373445	1.35469	0.0123303	0.155013	0.133147	7323	tags=52%, list=39%, signal=32%	GRIN2B/LRRTM1/ITPKA/GRID2/NGEF/LRFN2/ARHGAP22/ZDHHC15/LZTS3/ZNF804A/IL1RAPL1/LRP8/TIAM1/BHLHB9/EPHA4/EPHA7/SEMA3F/ARC/CDH2/CDK5/TANC2/LRFN1/NRP2/FYN/ZMYND8/ADAM10/SRCIN1/EEF2K/CUX2/FCGR2B/LRRTM2/ARF4/DNM1L/IL1RAP/PTPRD/KIF1A/SRGN/APOE/ABI2/VPS35/SIPA1L1/PDLIM5/PPP1R9A/CRIPT
GOMF_GUANYL_NUCLEOTIDE_BINDING	GOMF_GUANYL_NUCLEOTIDE_BINDING	365	0.30341	1.19038	0.0123303	0.155013	0.133147	10765	tags=61%, list=58%, signal=26%	TUBB4A/ACSM6/RAB40AL/RAB44/TUBB1/SRL/RASL10B/GIMAP5/RERGL/ACSM5/TUBA8/TUBA4A/IRGM/GNL3L/MX2/NPR1/NPR2/RAB25/HHAT/RAB5C/RABL2A/EEF1A2/GBP3/GNA11/RRAGB/RHOH/ATL1/RHOB/RASL10A/RAB27B/RERG/IFI44L/RHOBTB1/GNA12/GNAO1/RAB35/DNM1/NRAS/DRG2/RAB32/GNAZ/LSG1/GTPBP4/RALB/MFN1/PRKG2/ARL2/RHOC/TUBB2A/GMPPB/RAB40C/IFT22/SLC19A1/TUBA1A/RAC2/TUBB6/RAN/EHD1/EFL1/ARL6/RCC1L/RAB24/RASD1/GNAI3/RRAGC/PRKG1/NOA1/HSP90…
GOMF_MODIFICATION_DEPENDENT_PROTEIN_BINDING	GOMF_MODIFICATION_DEPENDENT_PROTEIN_BINDING	151	0.341973	1.29392	0.0123303	0.155013	0.133147	9804	tags=63%, list=53%, signal=30%	ATRIP/MINDY1/OTUD7A/JMJD7/FAM156A/ANK2/BRD7/ZCWPW2/SPIN3/UBQLN4/KDM5A/RNF168/PHF19/CBX8/LRWD1/THAP7/ANKRD13D/FAAP20/KDM4A/DZIP3/CHD8/TAF1/CARM1/OTUD7B/PLCG2/RAD18/DNAJB2/PSME4/MLLT3/ZMYND8/PWP1/ING2/BRCC3/KMT2E/TRIM24/YEATS4/BPTF/BRD9/TP53BP1/ZCWPW1/PHIP/VCP/PRPF8/ING5/ANKRD13B/PHF8/PTPN6/PYGO1/PML/MTF2/SPIN4/KDM7A/WDR5/LAPTM5/LYN/DNAJC2/MINDY2/RAD23A/SPRTN/IKBKE/HDAC6/DAXX/MPHOSPH8/TNIP2/BRD4/TD…
GOBP_POSITIVE_REGULATION_OF_LYMPHOCYTE_MIGRATION	GOBP_POSITIVE_REGULATION_OF_LYMPHOCYTE_MIGRATION	37	0.433469	1.44442	0.0124547	0.155425	0.133502	7582	tags=62%, list=41%, signal=37%	S100A7/CCR2/CD99L2/PTK2B/ADAM17/CXCL12/OXSR1/TNFRSF14/WNK1/ADAM10/PYCARD/CCL21/CXCL13/SELENOK/CCL20/CCL4/DOCK8/STK39/CXCL10/CXCL14/JAM2/XCL2/APP
GOBP_MITOCHONDRIAL_TRANSMEMBRANE_TRANSPORT	GOBP_MITOCHONDRIAL_TRANSMEMBRANE_TRANSPORT	91	0.371198	1.35384	0.0124797	0.155425	0.133502	8617	tags=57%, list=46%, signal=31%	SLC25A2/PRKAB2/CPT1B/SLC25A4/TOMM20L/CPT2/UCP2/PRKAA2/SLC25A12/SLC25A1/AFG3L2/MID1IP1/SLC25A37/MRS2/SFXN1/VDAC1/TIMM17B/MICU2/SLC25A36/TOMM70/MCU/GRPEL1/SMDT1/GRPEL2/MPC2/MT-ATP6/MRPL18/SFXN2/ROMO1/SLC25A5/SLC25A6/MCUB/SLC39A8/PRKAG2/SLC25A32/SLC25A13/TOMM40L/HSPD1/SLC25A41/AIFM1/SLC25A38/PNPT1/UCP3/TIMM17A/DNAJC30/STOML2/DNAJC19/ACACA/TIMM23/MAIP1/MPC1/SLC25A29
GOBP_NCRNA_PROCESSING	GOBP_NCRNA_PROCESSING	374	0.30374	1.19131	0.0124797	0.155425	0.133502	10892	tags=65%, list=58%, signal=28%	IL6/DDX47/USB1/TYW1B/HELB/TARBP2/RNASEL/TOE1/CTU2/INTS9/INTS6L/TRMT10B/TRMT61B/AARS2/TSEN54/URB1/EXOSC6/INTS5/SIRT7/TSEN34/KTI12/QTRT1/FBLL1/TBL3/DHX37/ELP3/DDX52/SART1/GTPBP4/CPSF4/METTL6/PIH1D2/MRM1/NOP9/IMP4/HSD17B10/TRMO/AGO1/ELP6/MTERF4/PES1/DPH3/NSUN6/RPP30/TYW5/SRRT/EBNA1BP2/DGCR8/RPP21/RIOK2/TRMT61A/ELP5/DDX18/BYSL/TRNT1/RPUSD3/MRM2/TP53RK/POP4/METTL5/TRIT1/DICER1/NOL11/ZBTB8OS/TFB1M/ZCCH…
GOBP_REGULATION_OF_DNA_METABOLIC_PROCESS	GOBP_REGULATION_OF_DNA_METABOLIC_PROCESS	321	0.307229	1.19978	0.0124797	0.155425	0.133502	9231	tags=52%, list=50%, signal=27%	MORC1/ZSCAN4/STPG4/IL6/PRKCQ/APLF/AXIN2/DUSP1/BRCA1/GNL3L/SPIRE2/TFRC/ST20/RTEL1/DDX11/SMG6/ACD/HDAC10/DACH1/CDT1/TFIP11/MAPK3/NMNAT1/POLH/RECQL5/HELB/UBQLN4/WT1/KMT5C/OGG1/RNF168/UBE2V1/MAP2K7/TEN1/CBX8/EXOSC6/SIRT7/FIGNL1/PTK2B/KLHL15/MIS18A/MLH1/MMS19/PARPBP/PDGFB/YLPM1/MAP3K4/PRKD2/THOC1/TINF2/PARP9/MSH3/TERF2/RIF1/UPF1/EYA3/NEK2/USP9X/PPP1R10/TMEM161A/ZNF365/MBD3/PPP4R2/MSH2/MEN1/RFC3/BRCC3/…
GOCC_ATPASE_COMPLEX	GOCC_ATPASE_COMPLEX	103	0.361502	1.33143	0.0124797	0.155425	0.133502	8927	tags=60%, list=48%, signal=32%	ATP1B4/ATP1A4/NCR1/KAT5/SMARCD3/ATAD5/SMARCC2/ATP1B2/CHD3/INO80C/RFC1/ABCB6/ATP10A/SMARCB1/INO80/MBD3/SS18L1/BICRAL/YY1AP1/RUVBL2/SMARCD2/SMARCA1/GATAD2B/ATP1B1/SMARCC1/SRCAP/BPTF/BRD9/ATP8B1/DMAP1/YY1/CSNK2A1/VCP/RBBP7/HDAC2/ATP1B3/PHF10/HDAC1/MTA1/MTA3/RB1/ATP8A1/PBRM1/ATP11A/RSF1/ABCB8/SS18/POLE3/DPF2/ATP10B/ATP1A3/MTA2/SMARCA4/BAZ1A/C17orf49/ABCD4/EP400/ATP1A1/ACTR5/CHD4/RUVBL1/SMARCA2
GOMF_OXIDIZED_DNA_BINDING	GOMF_OXIDIZED_DNA_BINDING	11	0.606737	1.60102	0.0125093	0.155502	0.133568	5424	tags=45%, list=29%, signal=32%	OGG1/MSH3/MSH2/POT1/RPS3
GOBP_CELLULAR_RESPONSE_TO_HEAT	GOBP_CELLULAR_RESPONSE_TO_HEAT	114	0.352554	1.30556	0.0126292	0.156409	0.134347	9873	tags=64%, list=53%, signal=30%	IL1A/TRPV1/TRPV4/HSPA1L/POM121/STAC/MAPK3/NUP210/CAMK2G/ANO1/DNAJB1/NUP133/NUP62/TPR/IRAK1/MAPT/HSPA1A/HSP90AB1/EP300/ATXN3/NUP50/HTRA2/SLC52A3/VCP/RBBP7/HDAC2/NUP214/HIKESHI/PDCD6/NUP37/MAPKAPK2/CREBBP/NDC1/SEH1L/NUP188/CDKN1A/NUP35/CAMK2D/CXCL10/LYN/ATM/DNAJC2/DNAJB6/YWHAE/RPA3/CD34/DAXX/BAG2/HSF1/NUP107/TFEC/RPA1/AKT1S1/RAE1/NUP54/ATR/CRYAB/HSPA1B/FKBP4/NUP85/SLU7/HSP90AA1/RPA2/HMOX1/AAAS/ATP2…
GOBP_DNA_INTEGRITY_CHECKPOINT	GOBP_DNA_INTEGRITY_CHECKPOINT	152	0.33627	1.27245	0.0126292	0.156409	0.134347	10627	tags=64%, list=57%, signal=28%	HUS1B/ATRIP/BRCA1/MUC1/ORC1/CNOT1/PLK1/RAD9A/CDT1/CRADD/TNKS1BP1/ARID3A/BTG2/XPC/DTL/E2F4/NAE1/CARM1/SYF2/DOT1L/THOC1/CDC25C/ZNF385A/EME2/TRIM39/BRIP1/ETAA1/PPP1R10/PRPF19/TAOK3/PRMT1/PLK3/MDM4/MSH2/BRCC3/CDC6/EP300/CNOT6/AURKA/STK33/CNOT6L/TP53BP1/INTS7/CNOT4/PTPN11/WAC/GADD45A/EIF2AK4/CASP2/CHEK1/MAPK14/FOXO4/PML/PCBP4/RPL26/ZNF830/CDKN1A/CRY1/CNOT3/NEK11/RHNO1/RAD1/ATM/FBXO31/NBN/CNOT11/DDX39B…
GOBP_CHOLESTEROL_EFFLUX	GOBP_CHOLESTEROL_EFFLUX	49	0.406547	1.40108	0.0126672	0.156589	0.134501	6982	tags=49%, list=37%, signal=31%	APOA5/PLA2G10/ABCG4/ABCA7/APOB/SHH/CES1/CETP/ABCA1/ABCA12/PTCH1/SREBF2/APOC2/NAXE/ABCA5/NR1H2/STX12/EEPD1/LAMTOR1/SCARB1/ABCA8/APOE/TTC39B/NFKBIA
GOBP_CELL_CYCLE_CHECKPOINT	GOBP_CELL_CYCLE_CHECKPOINT	204	0.327468	1.25717	0.0127786	0.157383	0.135183	8463	tags=51%, list=45%, signal=28%	HUS1B/WEE2/ATRIP/TEX14/DUSP1/USP44/BRCA1/MUC1/ORC1/CNOT1/PLK1/RAD9A/CDT1/CRADD/TNKS1BP1/ARID3A/BTG2/ZFYVE19/XPC/DTL/E2F4/NAE1/CARM1/SYF2/DOT1L/THOC1/CDC25C/ZWINT/ZNF385A/EME2/TRIM39/BRIP1/ETAA1/PPP1R10/PRPF19/TAOK3/LCMT1/PRMT1/PLK3/MDM4/VPS4A/MSH2/TPR/IK/BRCC3/NABP2/CDC6/EP300/CNOT6/FAM122A/AURKA/AURKB/STK33/CNOT6L/TP53BP1/PSMG2/INTS7/CNOT4/PTPN11/WAC/CENPF/GADD45A/EIF2AK4/CASP2/DCLRE1B/CHEK1/MAP…
GOBP_PHOSPHOLIPID_BIOSYNTHETIC_PROCESS	GOBP_PHOSPHOLIPID_BIOSYNTHETIC_PROCESS	263	0.314779	1.22042	0.0127786	0.157383	0.135183	10867	tags=66%, list=58%, signal=28%	PLA2G2F/GPD1/PLA2G4D/PLA2G10/HMGCS2/ACHE/LCAT/BMX/GPAT3/MBOAT1/ABHD8/LPCAT4/PIGO/MTMR3/PIK3CD/LPIN3/GPAM/STARD10/VAC14/DGKE/DGKA/AJUBA/MFSD2A/INPP5J/FDPS/MTM1/TAZ/PIGG/SAMD8/PMVK/CPNE6/CHKB/PI4KB/PIGL/PIGF/DGKG/PCYT1A/SLC44A3/DOLPP1/PIGV/DGKZ/SBF1/INPP5D/PDGFB/SGMS1/RUFY1/PLEKHA8/MTMR2/PLCG2/PLA2G6/CHKA/CDS1/PIK3R3/CWH43/SELENOI/PIGM/PLSCR1/CHP1/FAR1/HDHD5/GPAT4/PIGP/IDH1/DGKD/INPP5F/PPARD/MTMR9/…
GOMF_ACID_AMINO_ACID_LIGASE_ACTIVITY	GOMF_ACID_AMINO_ACID_LIGASE_ACTIVITY	21	0.500383	1.5137	0.0128703	0.158123	0.135819	6685	tags=67%, list=36%, signal=43%	TTLL13P/TPGS1/TTLL6/TTLL1/TTLL11/TTLL3/TTLL7/TTLL5/GCLC/GSS/PPCS/PAICS/TTL/GCLM
GOBP_VESICLE_TARGETING	GOBP_VESICLE_TARGETING	91	0.370749	1.3522	0.0129281	0.158123	0.135819	9010	tags=63%, list=48%, signal=33%	GRIA1/TRAPPC5/CEP19/GOSR2/TGFA/C17orf75/TRAPPC2/YKT6/GBF1/EXOC4/GORASP1/PPP6R1/TMED10/GOSR1/CLASP2/PSEN1/CHP1/SNAP23/TRAPPC6A/PEF1/F8/TBC1D23/LMAN1/SEC24B/TRAPPC9/SEC22B/TRAPPC4/GOLGA2/PPP6C/AP1M2/PDCD6/SNAP29/SCFD1/USO1/AP1AR/NSF/TBC1D20/SEC23A/CTSC/CUL3/ANKRD28/SEC23IP/SEC24D/PPP6R3/F5/CNIH2/COL7A1/SAR1A/ARFGAP3/CD59/SEC16A/CLASP1/TRAPPC3/SEC24A/SEC31A/STARD3/TRAPPC6B
GOBP_VITAMIN_METABOLIC_PROCESS	GOBP_VITAMIN_METABOLIC_PROCESS	124	0.345489	1.2886	0.0129281	0.158123	0.135819	6251	tags=45%, list=34%, signal=30%	CYP4F3/PRSS3/LRAT/CYP1A1/CTRB1/CYP2W1/CTRC/AMN/CYP4F12/PC/TNF/MTHFS/ALDH1A2/CYP26B1/TCN2/ACP5/THTPA/VNN2/LGMN/SLC2A3/ALDH1L1/BCO1/MCCC2/PANK2/CYP2R1/MCCC1/SLC5A6/LRP2/MTHFR/SLC23A2/PCCB/SLC19A1/CBR1/MTR/SLC25A19/PPARD/SHMT2/ABCC1/SLC52A3/PDZD11/AOX1/CYB5R3/CYP27B1/DHFR/BTD/ALDH1L2/PIAS4/PDXK/SLC23A1/TPK1/RBP1/SLC52A2/MTHFD1L/RFK/AKR1C3/SLC25A32
GOBP_NEGATIVE_REGULATION_OF_CELL_MATRIX_ADHESION	GOBP_NEGATIVE_REGULATION_OF_CELL_MATRIX_ADHESION	36	0.439939	1.45907	0.0129337	0.158123	0.135819	7432	tags=53%, list=40%, signal=32%	MMP12/ACER2/AJAP1/CDKN2A/BCAS3/ARHGAP6/DLC1/CLASP2/RASA1/NF2/ITGB1BP1/HOXA7/MAP4K4/POSTN/RCC2/SERPINE1/SRC/BCL6/CASK
GOBP_VESICLE_DOCKING_INVOLVED_IN_EXOCYTOSIS	GOBP_VESICLE_DOCKING_INVOLVED_IN_EXOCYTOSIS	44	0.428041	1.45744	0.01298	0.158398	0.136056	8402	tags=64%, list=45%, signal=35%	STX1B/VPS18/CFTR/PPFIA3/YKT6/STXBP2/EXOC4/RALB/VPS33A/VPS11/BLOC1S6/SYTL2/VAMP3/RAB13/RAB12/VTI1B/EXOC6/PLEK/SCFD1/EXOC6B/STXBP3/CTBP2/RAB10/SCFD2/RAB3D/UNC13A/UNC13B/RAB3A
GOBP_NEGATIVE_REGULATION_OF_CHROMOSOME_ORGANIZATION	GOBP_NEGATIVE_REGULATION_OF_CHROMOSOME_ORGANIZATION	86	0.370347	1.34551	0.0130776	0.159007	0.136578	8401	tags=53%, list=45%, signal=30%	TEX14/DUSP1/USP44/GNL3L/RTEL1/SMG6/ACD/PLK1/CDT1/TEN1/TINF2/ZWINT/NAA10/TERF2/LCMT1/TPR/IK/ERCC4/ERCC1/POT1/AURKB/TERF2IP/NAT10/PSMG2/CENPF/PHF8/MAD1L1/HNRNPA1/ANAPC15/ATM/NBN/TTK/SRC/RAD50/KLHL22/HNRNPU/BUB3/APC/MAD2L1/GEN1/SPDL1/WAPL/TNKS2/TET1/MCM2/BUB1B
GOBP_REACTIVE_OXYGEN_SPECIES_BIOSYNTHETIC_PROCESS	GOBP_REACTIVE_OXYGEN_SPECIES_BIOSYNTHETIC_PROCESS	103	0.360763	1.32871	0.0130776	0.159007	0.136578	9357	tags=63%, list=50%, signal=32%	MPO/DUOXA2/SLC30A10/NOS1/CYP1A1/DUOX2/NOS2/SNCA/GRIN1/GCHFR/DUOX1/HBB/TNF/PAGE4/CLEC7A/CYP1B1/MPV17L/PPARA/GBF1/NOS3/PTK2B/CD36/PTGIS/HDAC4/FYN/ADGRB1/DDAH2/HSP90AB1/RAC1/SOD2/PARK7/CYB5R3/JAK2/GCH1/DDAH1/PIKFYVE/TSPO/TICAM1/ASS1/SOD1/DYNLL1/CLU/CD34/SPR/KHSRP/ACOX1/CYP1A2/RORA/ALOX5/SLC5A3/TLR4/ITGB2/CAV1/ICAM1/TLR6/ZC3H12A/SPHK2/MT-CO2/IFNG/ROCK2/HSP90AA1/AKT1/CLCN3/CYBA/NOS1AP
GOBP_TRIGLYCERIDE_RICH_LIPOPROTEIN_PARTICLE_REMODELING	GOBP_TRIGLYCERIDE_RICH_LIPOPROTEIN_PARTICLE_REMODELING	12	0.598782	1.61289	0.0131278	0.159064	0.136628	2859	tags=58%, list=15%, signal=49%	APOA5/APOB/GPIHBP1/LCAT/LPL/CETP/APOC2
GOMF_2_OXOGLUTARATE_DEPENDENT_DIOXYGENASE_ACTIVITY	GOMF_2_OXOGLUTARATE_DEPENDENT_DIOXYGENASE_ACTIVITY	44	0.427722	1.45635	0.01313	0.159064	0.136628	9192	tags=68%, list=49%, signal=35%	JMJD7/TMLHE/P3H3/BBOX1/FTO/PLOD1/KDM4A/RIOX1/P4HB/P4HTM/P3H1/TYW5/P3H2/P4HA1/PHF8/ASPH/ALKBH2/KDM7A/ALKBH3/TET3/JMJD4/RIOX2/P4HA2/TET2/TET1/KDM4C/HSPBAP1/PLOD2/EGLN2/HIF1AN
GOBP_MICROTUBULE_ORGANIZING_CENTER_ORGANIZATION	GOBP_MICROTUBULE_ORGANIZING_CENTER_ORGANIZATION	139	0.340797	1.2818	0.013227	0.15937	0.13689	10927	tags=69%, list=59%, signal=29%	CEP295NL/C10orf90/BRCA1/CENPJ/CEP131/RTTN/PLK1/BCAS3/CEP68/CEP72/CEP85/ARHGEF10/DCTN1/E2F4/CEP192/MDM1/FBXW5/CHD3/MARK4/CEP152/CNTLN/CLASP2/PARD6B/CEP44/NEK2/C2CD3/NUP62/CHMP5/CCDC78/ARL2/KAT2A/CHMP3/GCC2/KIAA0753/UVRAG/AURKA/KAT2B/GOLGA2/PPP1R12A/NAT10/XRCC2/CETN2/HAUS4/CHMP1B/GADD45A/CHEK1/SGO1/NPM1/ODF2/MAP9/CCNF/ALMS1/CEP120/NDE1/UXT/TMEM67/HAUS6/RBM14/TUBE1/STIL/CCDC61/FBXW11/SAC3D1/SSX2IP/C…
GOBP_RNA_PHOSPHODIESTER_BOND_HYDROLYSIS	GOBP_RNA_PHOSPHODIESTER_BOND_HYDROLYSIS	146	0.336721	1.2703	0.013227	0.15937	0.13689	10110	tags=69%, list=54%, signal=32%	CPSF4L/ERN2/SLFN13/ZC3H12B/CNOT1/SMG6/USB1/AZGP1/RNASEK/ZC3H12C/ZC3H12D/RNASEL/RNASEH2A/TOE1/NYNRIN/EXOSC6/RNASEH1/TSEN34/TBL3/DIS3L2/CPSF4/NOP9/AGO1/RPP30/ENDOU/RPP21/DCPS/CPSF3/FIP1L1/POP4/ENDOV/ERN1/DICER1/RIDA/CPSF6/PCF11/CNOT6/SND1/ABT1/ISG20/DBR1/CNOT6L/ANGEL2/TSNAX/NUDT21/ERI2/AGO3/RCL1/CPSF2/YBEY/PARN/EDC3/APEX1/ELAC2/RNASE1/NCBP1/PDE12/NUDT16L1/TSN/PPP1R8/EXOSC4/REXO2/NHP2/EXOSC8/TSEN2/N…
GOCC_MIDBODY	GOCC_MIDBODY	182	0.33027	1.26169	0.013227	0.15937	0.13689	10763	tags=70%, list=58%, signal=30%	TEX14/APC2/FAM50B/DDX11/ZFYVE26/CRMP1/PLK1/PIN1/CENPC/IST1/ZFYVE19/CPEB3/PTCH1/TRIOBP/CEP126/EXOC4/WIZ/SVIL/SIRT2/MARK4/TXNDC9/ECT2/LZTS2/RALB/CEP44/AURKC/SSH1/GDI1/NEK2/NUP62/TTC19/VPS4A/RAN/LAP3/TACC1/PRC1/USP8/SPAG5/CTNND1/KLHL9/GNAI3/ANXA2/UVRAG/EXOC2/NTNG2/AURKA/AURKB/TSG101/PPP1CC/RALA/VPS37B/CAPG/EML4/NAT10/SH3GLB1/YPEL5/CHMP1B/CENPF/CEP55/EXOC6/CDCA8/ANXA11/RAP2A/CCDC66/ANKRD54/HSP90B1/CL…
GOBP_SERINE_PHOSPHORYLATION_OF_STAT_PROTEIN	GOBP_SERINE_PHOSPHORYLATION_OF_STAT_PROTEIN	18	-0.359709	-1.72855	0.0132937	0.159884	0.137332	1251	tags=39%, list=7%, signal=36%	IFNA6/IFNA4/IFNA1/IFNA5/IFNA13/IFNA16/IFNA7
GOBP_RESPONSE_TO_RADIATION	GOBP_RESPONSE_TO_RADIATION	425	0.298088	1.17494	0.0133765	0.16059	0.137938	8912	tags=53%, list=48%, signal=28%	TH/AGRP/GRM6/CHRNB2/FOXB1/DBH/AANAT/PRPH2/DRD1/MMP1/RRH/GUCA1B/SERPINB13/KCNC2/DRD2/DCT/GRK1/PPEF1/ABCA7/PDC/GRIN1/CRB1/USP2/NHEJ1/DUSP1/HOXA1/BRCA1/NMU/SYNGAP1/ST20/POLD1/NDRG4/KIT/UVSSA/CRTC1/RAD9A/MAPK10/NFATC4/POLH/DDB2/GNA11/TNKS1BP1/TRPC3/DCLRE1C/CPT1B/RHOB/ALAD/GRK4/KAT5/XPC/TANC1/OGG1/DTL/RNF168/CDKN2D/MAP2K7/POLD3/PER2/GNGT2/ID2/BEST1/FIGNL1/CCR4/CYP2R1/CDK5/TAF1/CXCL12/RDH13/ECT2/RGS14/…
GOBP_ALDITOL_PHOSPHATE_METABOLIC_PROCESS	GOBP_ALDITOL_PHOSPHATE_METABOLIC_PROCESS	11	0.602864	1.5908	0.0135167	0.161982	0.139134	2688	tags=45%, list=14%, signal=39%	GPD1/GPAT3/ABHD6/GPAM/GPD2
GOMF_CYCLIN_DEPENDENT_PROTEIN_SERINE_THREONINE_KINASE_REGULATOR_ACTIVITY	GOMF_CYCLIN_DEPENDENT_PROTEIN_SERINE_THREONINE_KINASE_REGULATOR_ACTIVITY	46	0.418627	1.43687	0.0135666	0.162288	0.139396	8309	tags=59%, list=45%, signal=33%	CDKN2A/CCNO/CCNE1/CDKN2D/CDK4/HEXIM1/CCNT1/CNPPD1/CCNJL/CCNA1/CCNYL1/CCNA2/CCNY/CCNT2/CCNB2/KAT2B/CDKN1C/CCNF/CDKN1A/CCNJ/CCNG1/CKS1B/CDKN2B/CCNE2/CCND3/CCND1/CDK5R2
GOBP_NEGATIVE_REGULATION_OF_SUPRAMOLECULAR_FIBER_ORGANIZATION	GOBP_NEGATIVE_REGULATION_OF_SUPRAMOLECULAR_FIBER_ORGANIZATION	148	0.338898	1.28017	0.0136754	0.162713	0.139761	8786	tags=55%, list=47%, signal=30%	TUBB4A/TRIM54/FRMD7/SHANK1/SNCA/TMSB15B/ARHGEF18/APC2/PLEKHH2/CGNL1/CARMIL1/PFN4/SPEF1/ARHGAP6/INPP5J/DLC1/ADD3/GMFG/TRIOBP/SSH3/FLII/SVIL/CLASP2/SSH1/SCIN/MID1IP1/CAPZB/EMILIN1/LMOD1/TACSTD2/CDH5/MAP1B/SWAP70/HIP1R/MTPN/GMFB/EML2/DYRK1A/CAPG/PFDN2/SPTBN5/TMOD1/ARPIN/STMN1/TWF1/PRKCD/CHADL/TMSB4X/ARHGAP28/MAP2/TMOD3/SPTBN1/PRKN/PIK3CA/APOE/INPP5K/AVIL/PAK2/CLU/SMAD4/HDAC6/PPP1R9A/PFN2/CTNNA2/KANK…
GOCC_PROTEIN_KINASE_COMPLEX	GOCC_PROTEIN_KINASE_COMPLEX	101	0.362152	1.3316	0.0136754	0.162713	0.139761	8880	tags=61%, list=48%, signal=32%	PRKAG3/CCNO/ACVR1C/CCNE1/PRKAB2/ULK1/ACVR1/PHKA2/PRKAB1/CDKN2D/CDK4/PHKG2/IFIT5/CDK5/GTF2H3/MMS19/CCNT1/CDK6/CNPPD1/CCNJL/CCNA1/CCNA2/PHKB/ERN1/UVRAG/CCNY/CCNT2/PYCARD/CCNB2/ERCC2/CAB39/GTF2H5/NEK10/MAP3K5/CDK14/CCNF/TBC1D5/CDKN1A/RB1CC1/PRKAG2/RB1/CCNJ/CCNG1/CKS1B/IGF1R/GTF2H4/TGFBR1/SESN2/GTF2H2/ACVR1B/CCNE2/SNW1/CCND3/BCCIP/IKBKB/CCND1/IKBKG/CDK5R2/CDK13/C9orf72/CDK7/PRKAG1
GOMF_TRANSFERASE_ACTIVITY_TRANSFERRING_ONE_CARBON_GROUPS	GOMF_TRANSFERASE_ACTIVITY_TRANSFERRING_ONE_CARBON_GROUPS	208	0.323582	1.24283	0.0136754	0.162713	0.139761	9029	tags=54%, list=48%, signal=28%	METTL21C/BHMT/PRDM16/METTL7B/PNMT/AMT/HNMT/PRDM5/METTL27/COQ3/FAM86B1/PCIF1/GATM/ALDH1L1/PRDM1/N6AMT1/EHMT2/KMT5C/FBXO11/TRMT10B/MEPCE/TRMT61B/SETD4/MECOM/SMYD5/FBLL1/CMTR1/CARM1/METTL6/INMT/PCMT1/MRM1/ETFBKMT/DOT1L/PRDM2/TRMO/TYMS/NSUN6/SETD7/SMYD4/SETD5/TRMT61A/LCMT1/PRMT1/PCMTD2/MRM2/GART/METTL5/MEN1/CIAPIN1/MTR/CAMKMT/LRTOMT/SETD2/NNMT/TFB1M/ZCCHC4/SHMT2/MRM3/TFB2M/SMYD2/METTL21A/PRDM11/TRMT2…
GOBP_CELLULAR_RESPIRATION	GOBP_CELLULAR_RESPIRATION	183	0.324876	1.2415	0.0138248	0.164101	0.140954	9595	tags=60%, list=51%, signal=29%	COX6A2/GPD1/NOS2/PRDM16/SNCA/ETFB/NFATC4/ACO2/TAZ/COQ9/COQ10A/PANK2/GPD2/NDUFS6/IDH3G/NDUFS8/ACO1/SLC25A12/UQCC3/ETFA/LYRM7/NDUFA10/NDUFA11/UQCRQ/NDUFC1/SCO2/SDHAF4/IDH1/AFG1L/MDH1/MDH2/NOA1/AIFM2/NDUFA6/NDUFS3/NDUFB7/SHMT2/COX7C/NNT/COX6B1/GHITM/NDUFA8/PARK7/VCP/IDH2/NDUFA12/MT-CO1/ISCU/NDUFB9/NDUFA9/COX5B/ME2/CYCS/COX8A/NDUFA5/CISD1/DGUOK/OGDHL/COX7A2L/NDUFB1/CS/UQCRFS1/NDUFB4/NDUFV3/NDUFB8/MYB…
GOMF_PEPTIDE_TRANSMEMBRANE_TRANSPORTER_ACTIVITY	GOMF_PEPTIDE_TRANSMEMBRANE_TRANSPORTER_ACTIVITY	35	0.438944	1.45228	0.0138413	0.164101	0.140954	7537	tags=66%, list=40%, signal=39%	SLC15A2/ABCA1/AZGP1/DISP1/SEC61A2/CDH17/TOMM20L/SEC61G/TMED10/SLC13A3/SEC61A1/TOMM22/TIMM17B/ABCC1/TOMM70/TAP2/MCL1/TIMM22/SEC63/GJA1/TOMM40L/TAP1/TIMM17A
GOBP_NEUTROPHIL_CHEMOTAXIS	GOBP_NEUTROPHIL_CHEMOTAXIS	99	0.361711	1.32724	0.0139743	0.165358	0.142034	8926	tags=62%, list=48%, signal=32%	CXCR1/CXCL5/NOD2/CCL23/S100A9/CXCR2/C5AR2/IL23A/EDN2/CCL26/CCL8/DPP4/CXCL2/MPP1/CCL22/PIK3CD/RIPOR2/CCL25/CCL24/JAM3/TIRAP/GBF1/RAC2/SYK/CCL2/PREX1/CXCL3/SRP54/FCER1G/C3AR1/RAC1/CCL21/CXCL13/PPIB/MCU/LBP/CD74/CCL20/CCL4/DNM1L/PLA2G1B/TGFB2/MOSPD2/PIKFYVE/C5AR1/CXCL10/CCL19/CXCL9/PDE4B/CX3CL1/PPIA/XCL2/CCL11/ITGB2/SLIT2/PF4V1/NCKAP1L/PIK3CG/CCL17/CXCL1/ITGA1
GOBP_REGULATION_OF_DEFENSE_RESPONSE_TO_VIRUS_BY_VIRUS	GOBP_REGULATION_OF_DEFENSE_RESPONSE_TO_VIRUS_BY_VIRUS	29	0.461741	1.48139	0.013997	0.165358	0.142034	7574	tags=59%, list=41%, signal=35%	AP1M1/AP2A2/AP1S1/AP1B1/AP2B1/FYN/CD4/AP2M1/ATP6V1H/AP2S1/RAC1/LCK/AP1M2/PAK2/CD8B/PACS1/EIF2AK2
GOBP_COPULATION	GOBP_COPULATION	19	0.508605	1.50908	0.0140355	0.165519	0.142172	2807	tags=42%, list=15%, signal=36%	VIP/PI3/SEMG1/P2RX1/ADA/KLK14/SERPINE2/CNR1
GOBP_POSITIVE_REGULATION_OF_LEUKOCYTE_PROLIFERATION	GOBP_POSITIVE_REGULATION_OF_LEUKOCYTE_PROLIFERATION	143	0.33937	1.27825	0.0141238	0.166266	0.142814	9976	tags=63%, list=54%, signal=29%	IL1A/CHRNB2/MPL/TNFRSF13C/CLECL1/IL6/IL23A/CCR2/PRKCQ/FLT3LG/TFRC/SLC39A10/SHH/ZAP70/CD274/HHLA2/GPAM/MAPK3/EPO/ADA/PNP/STAT5B/TIRAP/LGALS9/RASAL3/CCDC88B/AGER/TNFRSF4/CSF1R/CD4/IL13/SYK/CD46/CD70/PYCARD/HLA-A/IGFBP2/ZNF335/CD1D/NFATC2/IL6ST/SELENOK/CD74/HLA-E/NCK2/VCAM1/RPS3/GPR183/IRS2/CDKN1A/CD3E/PDCD1LG2/IL7/PTPRC/LYN/CCL19/TICAM1/MIF/JAK3/ICOSLG/IGF1/CSF1/RIPK2/BCL6/IL5/PELI1/HES1/NCK1/MYD88…
GOBP_CELLULAR_RESPONSE_TO_OSMOTIC_STRESS	GOBP_CELLULAR_RESPONSE_TO_OSMOTIC_STRESS	39	0.43574	1.46285	0.0142375	0.16731	0.14371	8925	tags=62%, list=48%, signal=32%	AQP5/TRPV4/BDKRB2/EPO/ZFP36L1/OXSR1/RCSD1/DDX3X/XRCC6/SLC2A4/CAB39/MYLK/MBIP/STK39/TSPO/LRRC8C/RELB/EFHD1/LRRC8D/LRRC8E/AKR1B1/BAD/ARHGEF2/CAPN3
GOBP_POSITIVE_REGULATION_OF_COLD_INDUCED_THERMOGENESIS	GOBP_POSITIVE_REGULATION_OF_COLD_INDUCED_THERMOGENESIS	95	0.360717	1.32162	0.0142732	0.167434	0.143817	9111	tags=61%, list=49%, signal=31%	ADRB3/DBH/PRDM16/CCR2/ACHE/PLAC8/SLN/KSR2/BSCL2/LCN2/ADRB2/PRKAB2/ACADL/GATM/PRKAB1/G0S2/SCD/GRB10/PER2/IL4R/HDAC3/CPT2/CD36/ZBTB7B/UCP2/GPR3/DYNC1H1/TRPV2/IL13/SYK/OGT/TSHR/YBX2/GNAS/JAK2/ALMS1/CNOT3/LEPR/ELOVL6/GJA1/IGF1R/PTH2R/PEMT/ACSL1/HSF1/KDM6B/APC/VEGFA/FFAR4/DECR1/CAV1/HADH/OMA1/PDGFC/DIO2/PPARGC1A/IRF4/GADD45G
GOCC_ACTIN_FILAMENT_BUNDLE	GOCC_ACTIN_FILAMENT_BUNDLE	67	0.378454	1.3472	0.0144227	0.168466	0.144704	7104	tags=51%, list=38%, signal=32%	XIRP2/MYH7/MYH6/ACTA1/RFLNA/MST1R/LDB3/PDLIM2/PRKCZ/FSCN1/PLS1/FHOD1/LCP1/TEK/ABLIM3/SYNPO/NEBL/MARCKS/MICALL2/PALLD/CNN2/ABLIM1/PDLIM7/MYH9/MYLK/PDLIM1/SORBS1/SYNPO2/SIPA1L3/PRICKLE4/RFLNB/PDLIM5/LIMCH1/PGM5
GOBP_COENZYME_A_METABOLIC_PROCESS	GOBP_COENZYME_A_METABOLIC_PROCESS	15	0.549741	1.55257	0.0144287	0.168466	0.144704	4609	tags=60%, list=25%, signal=45%	MCCC2/PANK2/PANK3/PPCDC/CROT/ACAT1/NUDT7/HMGCR/PPCS
GOBP_LONG_TERM_SYNAPTIC_POTENTIATION	GOBP_LONG_TERM_SYNAPTIC_POTENTIATION	80	0.374528	1.34993	0.0144371	0.168466	0.144704	3000	tags=35%, list=16%, signal=29%	GRIN2B/IGSF11/CHRNA7/CRHR2/SHANK1/CYP46A1/DRD2/SCGN/MPP2/RASGRF2/CRTC1/PRRT1/NFATC4/CALB2/PRKCZ/ADORA2A/LGMN/GRIN2D/TSHZ3/EPHA4/NRGN/ARC/SERPINE2/AGER/PTK2B/NCSTN/SHANK2/RGS14
GOBP_SYNAPTIC_TRANSMISSION_DOPAMINERGIC	GOBP_SYNAPTIC_TRANSMISSION_DOPAMINERGIC	24	0.485583	1.50736	0.0145601	0.169153	0.145294	642	tags=29%, list=3%, signal=28%	TH/CHRNB2/CRHBP/DRD4/DRD1/DRD2/SNCA
GOBP_PEPTIDE_SECRETION	GOBP_PEPTIDE_SECRETION	379	0.300944	1.18123	0.0145721	0.169153	0.145294	9935	tags=58%, list=53%, signal=28%	NPY2R/VIP/SSTR5/IL1A/NR0B2/CARTPT/CRHBP/EPHA5/DRD4/NOS2/FFAR3/PAX8/KCNC2/DRD2/IL6/RASL10B/ACHE/ADTRP/OR51E2/KCNA5/ABCC8/GPLD1/TGFB3/CTAGE8/NMU/ILDR2/TNF/GAL/DPP4/PASK/RAB11FIP1/IL1RN/TCIRG1/TFAP2B/ZBED6/CYP51A1/TTN/MYOM1/C1QTNF3/CFTR/ACVR1C/ABCA1/TIAM1/ADORA2A/HFE/GPR68/CAMK2G/LRP5L/TANGO6/SLC12A2/TM7SF3/TANGO2/ADAM9/SLC25A4/DISP1/RHBDF1/STXBP5L/CD33/ANO1/CAMK2N1/NLGN2/PER2/RAB11FIP5/MON1A/SIRT4/…
GOBP_REGULATION_OF_CYCLIN_DEPENDENT_PROTEIN_KINASE_ACTIVITY	GOBP_REGULATION_OF_CYCLIN_DEPENDENT_PROTEIN_KINASE_ACTIVITY	98	0.358828	1.31574	0.0145721	0.169153	0.145294	7652	tags=51%, list=41%, signal=30%	WEE2/CDKN2A/PKMYT1/PLK1/CCNO/CCNE1/SERTAD1/PKD1/CDKN2D/CAMK2N1/CDK4/HEXIM1/ADAM17/GTPBP4/PDGFB/CCNT1/CDC25C/CNPPD1/CCNJL/CCNA1/HERC5/CCNYL1/CCNA2/FBXO7/MEN1/CDC25A/CCNY/CDC6/CCNT2/HSP90AB1/EGFR/CCNB2/KAT2B/SPDYA/GADD45A/CDKN1C/LATS2/CCNF/TFAP4/CDKN1A/CCNJ/CCNG1/CKS1B/SRC/CDKN2B/IPO5/CCNE2/CCND3/BCCIP/APC
GOMF_UBIQUITIN_LIKE_PROTEIN_CONJUGATING_ENZYME_ACTIVITY	GOMF_UBIQUITIN_LIKE_PROTEIN_CONJUGATING_ENZYME_ACTIVITY	35	0.43667	1.44476	0.0145977	0.169155	0.145295	6356	tags=43%, list=34%, signal=28%	UBE2S/AKTIP/TAF1/UBE2Z/UBE2F/UBE2A/UBE2O/UBE2E2/CDC34/UBE2G1/UBE2H/UBE2D1/UFC1/UBE2B/UBE2D3
GOMF_STEROID_HYDROXYLASE_ACTIVITY	GOMF_STEROID_HYDROXYLASE_ACTIVITY	31	0.449048	1.46278	0.0146272	0.169204	0.145337	996	tags=29%, list=5%, signal=28%	CYP2A7/CYP8B1/CYP1A1/CYP7A1/CYP46A1/CYP2W1/CYP3A5/CYP3A43/CYP3A7
GOMF_SNAP_RECEPTOR_ACTIVITY	GOMF_SNAP_RECEPTOR_ACTIVITY	36	0.437343	1.45046	0.0147489	0.170316	0.146292	5771	tags=44%, list=31%, signal=31%	STX1B/GOSR2/YKT6/GOSR1/STX16/BET1L/SNAP23/STX12/VAMP3/SEC22B/VTI1B/SNAP29/BNIP1/TSNARE1/STX17/STX2
GOBP_LATERAL_VENTRICLE_DEVELOPMENT	GOBP_LATERAL_VENTRICLE_DEVELOPMENT	11	0.599662	1.58235	0.01486	0.170543	0.146488	4110	tags=55%, list=22%, signal=43%	PAX5/DNAH5/ATP1B2/CDK6/NUMB/RPGRIP1L
GOBP_NOTCH_SIGNALING_PATHWAY	GOBP_NOTCH_SIGNALING_PATHWAY	176	0.327609	1.25035	0.014871	0.170543	0.146488	7608	tags=49%, list=41%, signal=30%	DLK1/TSPEAR/FCER2/NR0B2/NOD2/CNTN6/TIMP4/SUSD5/HOXD3/ASCL1/FOXC2/KCNA5/ETV2/KIT/MIB2/DTX4/MAML2/NEURL1B/BMP7/BEND6/EGFL7/BMP2K/NOS3/CBFA2T2/SREBF2/DTX3/ARRB1/DTX2/NCSTN/ADAM17/HEYL/MESP2/NLE1/PDCD10/NOTCH2/PSEN1/PLXND1/SLC35C2/ARRDC1/YAP1/NKAP/PERP/CD46/ADAM10/GOT1/ITGB1BP1/APH1A/EGFR/EP300/TRAF7/KAT2B/IFT74/SORBS2/PRAG1/ANXA4/CDH6/ENHO/DLL1/IL6ST/PRKCI/STAT1/GALNT11/POSTN/YBX1/CREBBP/TGFB2/TBX2/…
GOBP_REGULATION_OF_HEMOPOIESIS	GOBP_REGULATION_OF_HEMOPOIESIS	366	0.302681	1.18752	0.014871	0.170543	0.146488	10017	tags=58%, list=54%, signal=27%	IL1RL2/CARTPT/MPL/GPR55/IL23A/CCR2/PRKCQ/ITGA2B/NLRP3/LAG3/FOXN1/MYB/TNF/SHH/CYP26B1/ZAP70/LILRB1/ERBB2/PRKCZ/BTK/CTLA4/GPR68/RHOH/TESC/TLR3/PRDM1/ADA/VSIR/LRRC17/PNP/ZFP36L1/HOXA5/STAT5B/WDR61/LGALS9/IL4R/RARA/LDB1/MAFB/AGER/PTK2B/ZBTB7B/AP3D1/SART1/TMEM176B/INPP5D/PPP2R3C/P4HTM/CDK6/TNRC6B/TNRC6A/AGO1/NOTCH2/SCIN/TCTA/PRMT1/CD4/KAT2A/NKAP/ARNT/SYK/BRD1/FBXO7/RC3H2/THPO/RNF41/CREB1/CD46/PAF1/HSP…
GOCC_NUCLEAR_PERIPHERY	GOCC_NUCLEAR_PERIPHERY	126	0.340579	1.2712	0.014871	0.170543	0.146488	8899	tags=55%, list=48%, signal=29%	MYB/FIGN/PRKCZ/RNASEL/IFFO1/OGG1/RGS12/SATB1/RUNX1T1/ATN1/THOC1/TINF2/NUMA1/EBNA1BP2/NARF/PSMA6/MAEA/STAG1/POLA1/PSPC1/CFL2/HAT1/TPR/MEN1/RUVBL2/MAPT/PRR14/ATXN3/YEATS4/KIN/CENPW/SMC3/LMNA/KRT8/EIF6/YY1/SRPK1/LMNB1/CENPF/MBD1/PRKCD/PML/DCAF7/PIAS4/SORBS1/CLIC4/NUP35/HNRNPM/GMCL1/GHRHR/HNRNPU/DDX39B/MATR3/CASK/AKAP8L/SNW1/NUP107/ALOX5/PAXIP1/HLCS/NONO/UHRF1/MORC3/VIM/GFI1B/ZNF350/DNMT3A/RUVBL1/CFL1
GOCC_NEUROTRANSMITTER_RECEPTOR_COMPLEX	GOCC_NEUROTRANSMITTER_RECEPTOR_COMPLEX	46	0.417244	1.43213	0.0150656	0.171952	0.147697	2989	tags=35%, list=16%, signal=29%	GRIN2B/OLFM3/SHISA9/CACNG8/GRID2/SHANK1/SHISA8/GRIA1/GRIN1/GRIA3/DLG4/GRIK2/ABHD6/GRIN2D/PTK2B/SHANK2
GOBP_MACROMOLECULE_METHYLATION	GOBP_MACROMOLECULE_METHYLATION	279	0.310175	1.20502	0.0151699	0.171952	0.147697	9452	tags=56%, list=51%, signal=28%	METTL21C/DDX4/MORC1/ZFP57/CYP1A1/BHMT/TDRD12/PRDM16/STPG4/TDRD5/PAX5/BRCA1/MYB/PRDM5/PCIF1/N6AMT1/EHMT2/BTG2/WT1/KMT5C/FBXO11/PHF19/AASS/TRMT10B/MEPCE/TRMT61B/ZNF304/WDR61/SETD4/MECOM/SIRT7/TDRKH/IWS1/FBLL1/MIS18A/CMTR1/CARM1/ZC3H13/METTL6/PCMT1/MRM1/AUTS2/ETFBKMT/DOT1L/ARID4A/HSD17B10/TRMO/MTERF4/RIF1/MTHFR/NSUN6/SETD7/SMARCB1/SETD5/TRMT61A/LCMT1/PRMT1/MBD3/BCOR/PCMTD2/MRM2/PYGO2/PWP1/OGT/METTL5…
GOBP_MITOTIC_SPINDLE_ORGANIZATION	GOBP_MITOTIC_SPINDLE_ORGANIZATION	114	0.350411	1.29762	0.0151699	0.171952	0.147697	10873	tags=68%, list=58%, signal=29%	FSD1/PLK1/PKD1/ARHGEF10/DCTN1/CEP192/CEP126/GPSM2/DYNC1H1/CLASP2/AURKC/NEK2/TACC3/NUMA1/NUP62/CHMP5/CLTC/STAG1/RAN/TPR/TACC1/PRC1/HSPA1A/SPC25/PIBF1/AURKA/AURKB/SMC3/SBDS/GOLGA2/MAP4/VCP/CHMP1B/STMN1/KPNB1/MAP9/KIFC1/EFHC2/TOGARAM2/TOGARAM1/WRAP73/CCSAP/TTK/HNRNPU/NUDC/CHEK2/STIL/CCDC61/BCCIP/RMDN1/TBCE/LSM14A/TACC2/CLASP1/CKAP5/RAE1/MYBL2/HSPA1B/PCNT/KIF3B/CENPE/AAAS/MECP2/MISP/CHMP4B/WDR62/CENP…
GOBP_NEGATIVE_REGULATION_OF_SMALL_MOLECULE_METABOLIC_PROCESS	GOBP_NEGATIVE_REGULATION_OF_SMALL_MOLECULE_METABOLIC_PROCESS	90	0.360329	1.31298	0.0151699	0.171952	0.147697	6844	tags=49%, list=37%, signal=31%	UGT1A8/SLC22A13/ACMSD/RD3/CYP7A1/DKKL1/MALRD1/ATCAY/BRCA1/INSIG1/C1QTNF3/ERLIN2/MFSD2A/ACADL/ACADVL/PPARA/DDIT4/SIRT4/WDTC1/REST/PID1/CNR1/SLC25A12/ETFBKMT/HDAC4/FBP1/MAEA/EP300/PIBF1/CEACAM1/SOGA1/CYP27B1/PLEK/NUPR1/SIK1/CDA/SOX9/CRY1/AKR1C3/LEPR/TIGAR/APOE/SOD1/GIT1
GOBP_SMOOTH_MUSCLE_CELL_PROLIFERATION	GOBP_SMOOTH_MUSCLE_CELL_PROLIFERATION	125	0.343515	1.28133	0.0151699	0.171952	0.147697	9083	tags=56%, list=49%, signal=29%	HTR1B/VIP/FGF9/IL6/ITGA2/TGFB3/MYB/TNF/NPR1/NDRG4/PAK1/HBEGF/LDLRAP1/ID2/IL6R/MEF2D/PDGFB/NQO2/HDAC4/IL13/IRAK1/ERN1/GNAI3/PRKG1/EGFR/PPARD/XRCC6/FOXP1/SOD2/STAT1/JAK2/PTAFR/TGM2/ELN/MAP3K5/GPER1/NDRG2/MMP2/TCF7L2/CDKN1A/BMPR1A/DNMT1/IGFBP3/SERPINF2/ABCC4/GJA1/TRIB1/CALCRL/IGF1/CX3CL1/BMP4/PDGFD/NPR3/DDX39B/PHB/PTGIR/PRKDC/MYD88/HES5/CNN1/FGF2/AKR1B1/S1PR1/PPARG/RPS6KB1/IRAK4/IFNG/PPARGC1A/HMOX1/…
GOBP_T_CELL_PROLIFERATION	GOBP_T_CELL_PROLIFERATION	189	0.324349	1.24121	0.0151699	0.171952	0.147697	8195	tags=52%, list=44%, signal=30%	PLA2G2F/LGALS9C/IL1A/SFTPD/TNFRSF13C/CLECL1/IL6/IL23A/CCR2/PRKCQ/LMO1/DLG5/TFRC/SHH/RASGRP1/ZAP70/CD274/LILRB1/ERBB2/HHLA2/GPAM/CTLA4/EPO/PSMB10/VSIR/PNP/STAT5B/LGALS9/RASAL3/CCDC88B/AGER/ZBTB7B/ELF4/NCSTN/TNFRSF4/MAPK8IP1/SDC4/TNFRSF14/FYN/CD4/RAC2/SYK/RC3H2/CD151/PPP3CB/CD46/CBLB/CD70/PYCARD/SOS1/IRF1/HLA-A/IGFBP2/TNFSF8/RIPK3/LRRC32/MALT1/CD1D/LGALS9B/VSIG4/IL6ST/SELENOK/RC3H1/TNFRSF1B/HLA-E/T…
GOBP_INTERLEUKIN_10_PRODUCTION	GOBP_INTERLEUKIN_10_PRODUCTION	56	0.404831	1.41904	0.0152003	0.171952	0.147697	7836	tags=61%, list=42%, signal=35%	NOD2/EPX/IL6/IL23A/CD274/TRIB2/LILRB1/LILRA5/PRKCZ/CLEC7A/VSIR/LGALS9/AGER/TLR2/IL13/SYK/TUSC2/CD46/PYCARD/TREM2/PIBF1/FCGR2B/DLL1/TIGIT/HLA-DRB1/PDCD1LG2/JAK3/HSPD1/F2RL1/CD34/IDO1/BCL3/CD83/TLR4
GOMF_O_ACYLTRANSFERASE_ACTIVITY	GOMF_O_ACYLTRANSFERASE_ACTIVITY	48	0.408296	1.40869	0.0152003	0.171952	0.147697	6371	tags=50%, list=34%, signal=33%	LRAT/MOGAT2/LCAT/GPAT3/MBOAT1/CRAT/LPCAT4/PLA2G15/GPAM/HHAT/CPT1B/TAZ/CPT2/CROT/GPAT4/AGPAT3/PLA2G4A/AGPAT5/LCLAT1/GNPAT/AGPAT2/ABHD5/PLA2G4C/CASD1
GOBP_REGULATION_OF_NEUTROPHIL_MIGRATION	GOBP_REGULATION_OF_NEUTROPHIL_MIGRATION	41	0.422138	1.42635	0.0152614	0.172206	0.147916	6352	tags=51%, list=34%, signal=34%	NOD2/C5AR2/IL23A/DPP4/MPP1/RIPOR2/CD99L2/RHOH/JAM3/TIRAP/RAC2/C3AR1/RAC1/CCL21/MCU/LBP/CD74/DNM1L/MOSPD2/C5AR1/CCL19
GOCC_PARALLEL_FIBER_TO_PURKINJE_CELL_SYNAPSE	GOCC_PARALLEL_FIBER_TO_PURKINJE_CELL_SYNAPSE	12	0.592828	1.59686	0.0152745	0.172206	0.147916	1781	tags=42%, list=10%, signal=38%	GRID2/CNTN6/GRIA3/PLCB4/CALB2
GOBP_ASTROCYTE_DIFFERENTIATION	GOBP_ASTROCYTE_DIFFERENTIATION	69	0.379371	1.3529	0.0154703	0.172373	0.148059	8653	tags=59%, list=46%, signal=32%	S100A9/GPR37L1/IL6/TNF/PLP1/SHH/MAPK3/ADORA2A/EPHA4/SERPINE2/AGER/BACE2/CDK6/PSEN1/PRPF19/MAPT/EGFR/TREM2/PTPN11/DLL1/IL6ST/SOX9/KRAS/C5AR1/IFNGR1/SOX8/BIN1/GRN/GCM1/EIF2B5/HES1/NR1D1/APP/HES5/TLR4/SMO/NKX2-2/NOG/LAMC3/VIM/IFNG
GOBP_REGULATION_OF_PROTEIN_CATABOLIC_PROCESS	GOBP_REGULATION_OF_PROTEIN_CATABOLIC_PROCESS	375	0.305288	1.19768	0.0154703	0.172373	0.148059	9304	tags=56%, list=50%, signal=28%	VIP/AGBL4/NOS2/TIMP4/SNCA/KCNE2/AQP11/GPLD1/APC2/TNF/NELL1/SHH/AZIN2/CYP51A1/QRICH2/TRIB2/FOXF2/RILP/CDC20B/PLK1/HACE1/SNX33/HFE/EEF1A2/PIN1/ARAF/MAP1A/MTM1/UBQLN4/MGAT3/EPHA4/ALAD/ADAM9/PKD1/RHBDF1/PSMC1/WDR91/DTL/SGSM3/GNA12/SUFU/HUWE1/SERPINE2/BBS7/PTK2B/CCDC22/NRDC/SNX12/SIRT2/HECW2/TAF1/SMURF1/TMTC3/LRP2/IRAK3/VPS11/TRIM39/PSEN1/DDB1/DNAJB2/HECTD1/FAF1/TMEM9/MFSD8/FYN/PSME2/PLK3/MDM4/PRICKLE…
GOBP_REGULATION_OF_STEM_CELL_DIFFERENTIATION	GOBP_REGULATION_OF_STEM_CELL_DIFFERENTIATION	110	0.348917	1.28765	0.0154703	0.172373	0.148059	9447	tags=62%, list=51%, signal=31%	HOXB4/LMO1/TRIM6/MYB/PSMB10/PSMC1/TEAD2/LDB1/REST/OSM/PSMA6/PSME4/PSME2/YAP1/PRICKLE1/PSMB3/TACSTD2/PWP1/PSME3/OCIAD2/RUNX1/PSMC6/GATA1/NUDT21/SOX5/OCIAD1/N4BP2L2/PSMC4/PSMB8/PSMD13/PSMC2/TCF12/PSMD11/TGFB2/SOX9/PSMD3/PSMB7/PSMA2/NFE2L2/NELFB/PSMB1/PSMB2/SETD1A/PSMB9/PSMD5/TCF3/METTL3/HNRNPU/PSMC5/PSMD1/HES1/PRKDC/PSMC3/TBX5/EIF2AK2/PSMB6/HES5/TP73/PSMA7/WNT3A/CDK13/KMT2A/RBM24/PUS7/PSMD14/PSMF1/…
GOBP_SYNAPTIC_TRANSMISSION_GLUTAMATERGIC	GOBP_SYNAPTIC_TRANSMISSION_GLUTAMATERGIC	84	0.370646	1.34453	0.0154703	0.172373	0.148059	3219	tags=31%, list=17%, signal=26%	HTR1B/NPY2R/GRM6/GRM4/CACNG8/GRM7/GRID2/DRD1/SHANK1/DRD2/CCR2/P2RX1/TNF/GRIK2/ADORA2A/TSHZ3/NLGN2/SERPINE2/TPRG1L/CDH2/PTK2B/DGKZ/CNR1/CDK5/SHANK2/PSEN1
GOCC_INTRINSIC_COMPONENT_OF_ENDOPLASMIC_RETICULUM_MEMBRANE	GOCC_INTRINSIC_COMPONENT_OF_ENDOPLASMIC_RETICULUM_MEMBRANE	156	0.334674	1.26712	0.0154703	0.172373	0.148059	10885	tags=68%, list=58%, signal=29%	BSCL2/INSIG1/INSIG2/EMC8/RCE1/TRAM2/RNF183/SLC27A2/PIGG/RTN2/EMC1/SCD/SAMD8/HSD11B1/SREBF2/HLA-C/DOLPP1/TM7SF2/SGMS1/DNAJB2/TRAM1L1/SGPL1/TEX261/SLC37A1/AMFR/RHBDD1/EMC7/SEC61A1/HM13/EMC3/ERN1/ESYT2/CALR/HLA-A/SGMS2/RHBDD2/BFAR/TMEM33/SLC37A4/HLA-DQA1/CD74/SPCS1/GRAMD1A/HLA-E/CANX/RETREG1/RTN1/BNIP1/HLA-DRB1/TAP2/ELOVL5/HLA-F/PDIA3/LNPK/EDEM1/EMC2/ELOVL6/DNAJB12/HACD3/PIGT/HLA-DQB1/DHRS9/EXT1/AUP…
GOMF_ACTIN_BINDING	GOMF_ACTIN_BINDING	425	0.296994	1.17062	0.0154703	0.172373	0.148059	10736	tags=62%, list=58%, signal=27%	EPS8L3/XIRP2/MYH8/NRAP/MYO1A/SYNPO2L/MYH7/MYO3A/MYH6/ANXA8/MYBPC2/POF1B/MYH1/MYL2/ESPNL/NOD2/ESPN/SNCA/TNNC2/MYO7B/PKNOX2/TNNI1/TMSB15B/SNTG2/KLHL3/ERMN/TRPV4/MYH2/MYOZ3/MYOM3/SPIRE2/PLEKHH2/SNTA1/LDB3/VPS18/KLHL20/TTN/MYOM2/MYOM1/EPS8L1/MIB2/PDLIM2/PFN4/SPEF1/AJUBA/MYO1F/SHROOM2/CLMN/FSCN1/PLS1/FHOD1/MAP1A/ADD3/FLNC/JMY/COBL/LCP1/CORO7/EPS8L2/ABLIM3/S100A4/MYO15A/KPTN/GMFG/FKBP15/NOS3/TRIOBP/SSH…
GOMF_HISTONE_DEACETYLASE_BINDING	GOMF_HISTONE_DEACETYLASE_BINDING	111	0.35212	1.30125	0.0154703	0.172373	0.148059	9808	tags=64%, list=53%, signal=30%	ANKRA2/HDAC10/RAD9A/TCF21/NACC2/PRDM1/THAP7/HDAC3/WDTC1/ZBTB7B/SIRT2/MEF2D/BEX4/HDAC4/HDAC5/KAT2A/GMNN/BCOR/NIPBL/NACC1/HSPA1A/HSP90AB1/NR2C1/KAT2B/RAC1/NUDT21/USF1/HDAC2/YWHAB/SUDS3/NKX3-1/MEF2A/HDAC1/MTA1/TFAP4/MTA3/HOXA10/PKN2/MIER1/SP1/CRY1/DNMT3B/RELA/PRKN/HDAC9/HNRNPD/YWHAE/NRIP1/GCM1/HDAC6/PHB/HES1/GLI3/MEF2B/AKAP8L/SRF/ZMYND15/CCND1/MTA2/TOP2B/LCOR/HSPA1B/CHD4/HSP90AA1/CIR1/HIF1A/MEF2C/UH…
GOBP_MODULATION_BY_HOST_OF_SYMBIONT_PROCESS	GOBP_MODULATION_BY_HOST_OF_SYMBIONT_PROCESS	59	0.391164	1.37914	0.0155013	0.172429	0.148108	9339	tags=64%, list=50%, signal=32%	SFTPD/PC/CCL8/REST/CCNT1/SUGT1/ZBED1/SMARCB1/CSF1R/IFI27/LRRC19/TAF11/ANXA2/EP300/CAV2/TARDBP/PPIB/STOM/EIF2AK4/CCL4/TBC1D20/HDAC1/YTHDC2/TFAP4/ZNF639/SP1/PRKN/APOE/INPP5K/PHB/PSMC3/SNW1/SMARCA4/ZC3H12A/VAPA/CFL1/HMGA2/CHD1
GOCC_NMDA_SELECTIVE_GLUTAMATE_RECEPTOR_COMPLEX	GOCC_NMDA_SELECTIVE_GLUTAMATE_RECEPTOR_COMPLEX	10	0.599354	1.553	0.0157703	0.173686	0.149187	2707	tags=50%, list=15%, signal=43%	GRIN2B/SHANK1/GRIN1/GRIN2D/PTK2B
GOBP_ADAPTIVE_THERMOGENESIS	GOBP_ADAPTIVE_THERMOGENESIS	150	0.336201	1.27116	0.0157707	0.173686	0.149187	9111	tags=56%, list=49%, signal=29%	ADRB3/SCTR/DBH/PRDM16/FOXC2/CCR2/ACHE/PLAC8/SLN/KSR2/BSCL2/LCN2/ADRB2/ABHD6/NOVA2/PRKAB2/ACADL/GATM/PRKAB1/G0S2/SCD/GRB10/PER2/IL4R/SLC25A44/HDAC3/CPT2/CD36/NRDC/ID1/ZBTB7B/LNPEP/UCP2/ADAM17/GPR3/DYNC1H1/TRPV2/NR1H2/IL13/SYK/OGT/ARRDC3/LAMA4/TSHR/YBX2/GNAS/JAK2/ACOT11/LGR4/ALMS1/CNOT3/RB1/LEPR/ELOVL6/GJA1/IGF1R/PTH2R/PEMT/IL18R1/ACSL1/PGAM5/HNRNPU/NPR3/NR1D1/UCP3/HSF1/KDM6B/APC/TLR4/VEGFA/FFAR4/D…
GOBP_NEGATIVE_REGULATION_OF_CELL_ADHESION	GOBP_NEGATIVE_REGULATION_OF_CELL_ADHESION	266	0.312037	1.21026	0.0157707	0.173686	0.149187	7878	tags=46%, list=42%, signal=27%	PLA2G2F/LGALS9C/SFTPD/MMP12/ACER2/AJAP1/TRPV4/CDKN2A/ADTRP/ADAMDEC1/DLG5/PLXNA3/DUSP1/LAG3/MUC1/IL1RN/SHH/RIPOR2/CD274/LILRB1/ERBB2/GCNT2/BCAS3/ARHGAP6/CTLA4/HFE/CYP1B1/CCL25/JAM3/DLC1/SH2B3/VSIR/PPARA/LGALS9/C1QTNF1/IL4R/SERPINE2/ZBTB7B/PODXL/AKNA/SPINT2/MAPK7/GTPBP4/CXCL12/SEMA4D/CLASP2/RASA1/DUSP3/PLXND1/SDC4/NF2/TNFRSF14/WNK1/TACSTD2/RC3H2/SWAP70/CBLB/FZD4/ADAM10/PRKG1/ITGB1BP1/HOXA7/RUNX1/CE…
GOBP_ORGANELLE_FISSION	GOBP_ORGANELLE_FISSION	460	0.292414	1.15586	0.0157707	0.173686	0.149187	9900	tags=58%, list=53%, signal=28%	SYCE3/DDX4/IL1A/MEI4/ANKRD31/WEE2/TDRD12/TEX14/MEIOC/SYCP2/DUSP1/PSMC3IP/SYCE2/USP44/SPIRE2/CCDC8/MX2/SPHK1/MSX1/HOXA13/PKMYT1/TTN/CYP26B1/BECN1/PLK1/CDT1/DMC1/CCNE1/STAT2/TGFA/CDCA5/UBE2S/PIN1/BMP7/CUL9/MSH5/REC8/CENPC/CDC25B/CEP85/ARHGEF10/CHMP7/MTFP1/CEP192/NCAPH/ACOT8/SIRT7/FBXW5/DNM1/MAU2/FIGNL1/TDRKH/FANCM/MLH1/CNTD1/SIRT2/TEX12/HECW2/DIS3L2/MLH3/MYO19/PDGFB/TMEM135/GPR3/FIS1/DHODH/CDC25C/A…
GOBP_REGULATION_OF_BINDING	GOBP_REGULATION_OF_BINDING	344	0.302973	1.18685	0.0157707	0.173686	0.149187	10703	tags=64%, list=57%, signal=28%	FRMD7/WFIKKN2/CCL23/TEX14/SLPI/EFHB/ITGA2/SLN/CAMK1/TRIM6/ZBTB7C/GNL3L/MSX1/PHLDA2/DDX11/RIPOR2/ACD/CRMP1/ADRB2/PLK1/CDT1/NFATC4/IFIT1/TIAM1/TFIP11/MAPK3/GPSM1/HFE/PIN1/TMC8/EPHA4/AKTIP/LDLRAP1/PKD1/NES/SP100/SMARCD3/MEPCE/SPON1/ZNF304/PPARA/ATP2A3/PER2/SENP2/TRIM21/RARA/MED25/AGER/ID1/SYMPK/CDK5/SIRT2/TAF1/CARM1/GTPBP4/PDGFB/DOT1L/PARP9/RALB/IFIT2/CARD16/PSEN1/GTF2F1/DPH3/MDFI/PLXND1/NEK2/DNAJB2…
GOCC_INTRINSIC_COMPONENT_OF_ORGANELLE_MEMBRANE	GOCC_INTRINSIC_COMPONENT_OF_ORGANELLE_MEMBRANE	385	0.301055	1.18214	0.0157707	0.173686	0.149187	11358	tags=67%, list=61%, signal=27%	SPAAR/P2RX1/ACER2/ZDHHC15/MREG/MTX3/BSCL2/INSIG1/INSIG2/DNAJC11/SYP/SLC38A9/CHST2/CHCHD6/EMC8/RCE1/TRAM2/DMPK/RNF183/SLC27A2/SLC25A4/SLC46A3/PIGG/RTN2/EMC1/SCD/SAMD8/RAB27B/HSD11B1/PCSK4/TOMM20L/STEAP2/RAB35/APOOL/SREBF2/HLA-C/DOLPP1/TM7SF2/CNR1/YIF1A/VAMP5/ABCB6/SGMS1/FIS1/MFN1/AFG3L2/QSOX1/CHCHD3/UQCC3/IMMT/SV2C/STX16/DNAJB2/CSGALNACT1/PIGBOS1/TRAM1L1/SGPL1/TEX261/SLC37A1/BET1L/AMFR/RHBDD1/EMC7…
GOBP_POSITIVE_REGULATION_OF_INTERLEUKIN_2_PRODUCTION	GOBP_POSITIVE_REGULATION_OF_INTERLEUKIN_2_PRODUCTION	30	0.455832	1.47283	0.0158018	0.173742	0.149235	9358	tags=77%, list=50%, signal=38%	IL1A/CCR2/PRKCQ/CLEC7A/STAT5B/PRKD2/CD4/RUNX1/MALT1/RPS3/CD3E/PTPRC/SPTBN1/PDE4B/RIPK2/GLMN/TRAF2/CD83/PDE4D/CARD11/IRF4/SASH3/CD80
GOCC_SAM_COMPLEX	GOCC_SAM_COMPLEX	11	0.595265	1.57075	0.0158674	0.174176	0.149608	7038	tags=82%, list=38%, signal=51%	MTX3/DNAJC11/CHCHD6/APOOL/CHCHD3/IMMT/MTX2/SAMM50/MTX1
GOBP_VASODILATION	GOBP_VASODILATION	33	0.44555	1.46212	0.0160106	0.174775	0.150123	7698	tags=64%, list=41%, signal=37%	ADRB3/NOS1/DRD1/BBS2/BDKRB2/NPPA/ADRB2/ADORA2A/NOS3/GPX1/PRKG1/SOD2/GCH1/GPER1/APOE/SOD1/EDNRB/F2RL1/RGS2/EXT1/CPS1
GOBP_NUCLEAR_TRANSCRIBED_MRNA_CATABOLIC_PROCESS_NONSENSE_MEDIATED_DECAY	GOBP_NUCLEAR_TRANSCRIBED_MRNA_CATABOLIC_PROCESS_NONSENSE_MEDIATED_DECAY	120	0.344972	1.28513	0.0160711	0.174775	0.150123	6787	tags=48%, list=36%, signal=30%	SMG6/SMG8/RPL21/DCP1B/DCP1A/UPF1/PPP2R2A/RPS10/RNPS1/SMG7/RPS12/PARN/RPL3/RPS27/UPF2/EIF4G1/PNRC2/UBA52/RPS9/RPS28/RPL23A/RPL31/NCBP1/RPS23/RPS19/RPL37A/RPS3/RBM8A/RPS15A/RPL18/RPL11/SECISBP2/RPL28/RPL5/RPL32/RPS8/RPS24/CASC3/RPS18/RPL26/RPS4Y1/RPS25/RPL14/RPL24/RPLP1/RPL27A/RPL10/UPF3A/RPS6/RPS15/RPSA/PYM1/RPS20/RPL36/RPS11/PABPC1/RPS16
GOBP_REGULATION_OF_HEMATOPOIETIC_PROGENITOR_CELL_DIFFERENTIATION	GOBP_REGULATION_OF_HEMATOPOIETIC_PROGENITOR_CELL_DIFFERENTIATION	89	0.366174	1.33166	0.0160711	0.174775	0.150123	7775	tags=55%, list=42%, signal=32%	LMO1/MYB/PSMB10/PSMC1/LDB1/FNIP1/OSM/PSMA6/PSME4/PSME2/YAP1/PSMB3/PSME3/OCIAD2/RUNX1/SOS1/PSMC6/GATA1/NUDT21/OCIAD1/N4BP2L2/PSMC4/PSMB8/PSMD13/PSMC2/TCF12/PSMD11/PSMD3/PSMB7/PSMA2/NFE2L2/PSMB1/PSMB2/SETD1A/PSMB9/PSMD5/TCF3/METTL3/PSMC5/PSMD1/HES1/PRKDC/PSMC3/EIF2AK2/PSMB6/HES5/DPF2/TP73/PSMA7
GOBP_REGULATION_OF_LEUKOCYTE_PROLIFERATION	GOBP_REGULATION_OF_LEUKOCYTE_PROLIFERATION	233	0.319309	1.23286	0.0160711	0.174775	0.150123	8243	tags=52%, list=44%, signal=29%	PLA2G2F/LGALS9C/IL1A/CHRNB2/SFTPD/MPL/TNFRSF13C/CLECL1/IL6/IL23A/CCR2/PRKCQ/LMO1/FLT3LG/DLG5/CCL8/TFRC/MZB1/GAL/MNDA/SLC39A10/SHH/ZAP70/CD274/LILRB1/ERBB2/HHLA2/GPAM/MAPK3/BTK/CTLA4/EPO/ADA/VSIR/PNP/STAT5B/TIRAP/LGALS9/RASAL3/CCDC88B/AGER/ZBTB7B/TNFRSF4/INPP5D/MAPK8IP1/SDC4/CSF1R/TNFRSF14/CD4/IL13/RAC2/SYK/CD46/CBLB/CD70/PYCARD/SOS1/IRF1/HLA-A/IGFBP2/TNFSF8/RIPK3/LRRC32/FCGR2B/ZNF335/CD1D/NFATC2/…
GOBP_MAST_CELL_MIGRATION	GOBP_MAST_CELL_MIGRATION	14	0.543398	1.52076	0.0160929	0.174775	0.150123	7955	tags=86%, list=43%, signal=49%	PIK3CD/KIT/STAT5B/RAC2/SWAP70/RAC1/VEGFC/PGF/VEGFD/VEGFA/VEGFB/CCL11
GOMF_AROMATASE_ACTIVITY	GOMF_AROMATASE_ACTIVITY	21	0.49471	1.49654	0.0161479	0.174775	0.150123	1878	tags=38%, list=10%, signal=34%	CYP2A7/CYP4F3/CYP1A1/CYP3A5/CYP4F12/CYP3A43/CYP3A7/CYP1B1
GOBP_REGULATION_OF_T_CELL_MIGRATION	GOBP_REGULATION_OF_T_CELL_MIGRATION	43	0.421298	1.43101	0.0161518	0.174775	0.150123	7582	tags=65%, list=41%, signal=39%	AIRE/C10orf99/S100A7/CCR2/CD200R1/RIPOR2/CD99L2/ADAM17/CXCL12/LRCH1/OXSR1/CRKL/TNFRSF14/WNK1/ECM1/ADAM10/PYCARD/RIPK3/CCL21/CXCL13/SELENOK/CCL20/DOCK8/STK39/CXCL10/CRK/XCL2/APP
GOCC_NUCLEOID	GOCC_NUCLEOID	43	0.421225	1.43076	0.0161518	0.174775	0.150123	9175	tags=70%, list=49%, signal=36%	ACADVL/DHX30/HSD17B10/TFB1M/VDAC2/SHMT2/LRRC59/VDAC1/TFB2M/SOD2/GRSF1/DBT/ELAC2/MTERF1/TOP1MT/SLC25A5/MPG/UQCC2/TFAM/MTERF2/FASTKD2/TRMT10C/DDX28/TEFM/SUPV3L1/CPS1/POLG/CLPX/HADHA/POLRMT
GOBP_REGULATION_OF_SUPEROXIDE_METABOLIC_PROCESS	GOBP_REGULATION_OF_SUPEROXIDE_METABOLIC_PROCESS	27	0.459766	1.45676	0.0161581	0.174775	0.150123	8243	tags=74%, list=44%, signal=41%	PON3/HVCN1/CLEC7A/BMP7/CD36/SYK/MAPT/GNAI3/EGFR/DHFR/FBLN5/PRKCD/CD177/GCH1/NFE2L2/SOD1/F2RL1/AATF/ITGB2/TYROBP
GOBP_POSITIVE_REGULATION_OF_TYPE_2_IMMUNE_RESPONSE	GOBP_POSITIVE_REGULATION_OF_TYPE_2_IMMUNE_RESPONSE	16	0.552728	1.5844	0.0165094	0.178285	0.153137	2531	tags=38%, list=14%, signal=32%	NOD2/IL6/NLRP3/PRKCZ/IL4R/RARA
GOBP_EMBRYONIC_DIGESTIVE_TRACT_DEVELOPMENT	GOBP_EMBRYONIC_DIGESTIVE_TRACT_DEVELOPMENT	31	0.444119	1.44673	0.0166037	0.178377	0.153216	3616	tags=39%, list=19%, signal=31%	SALL1/TNF/ALDH1A2/OVOL2/SHH/FOXF2/TCF21/ADA/PKDCC/ID2/VPS52/NIPBL
GOBP_POSITIVE_REGULATION_OF_HISTONE_METHYLATION	GOBP_POSITIVE_REGULATION_OF_HISTONE_METHYLATION	34	0.441764	1.4544	0.0166374	0.178377	0.153216	8593	tags=76%, list=46%, signal=41%	BRCA1/MYB/PHF19/ZNF304/WDR61/AUTS2/RIF1/OGT/PAF1/KMT2E/JARID2/MTF2/CHTOP/DNMT3B/WDR5/DNMT1/NELFE/SMAD4/BRD4/CTR9/SNW1/PAXIP1/RNF20/TET1/PHF1/KMT2A
GOBP_PROTEIN_MATURATION	GOBP_PROTEIN_MATURATION	278	0.309631	1.2025	0.0166719	0.178377	0.153216	10194	tags=61%, list=55%, signal=28%	PRSS3/DUOXA2/AANAT/ECEL1/NAA11/ASTL/PCSK1N/PRSS12/PHEX/CORIN/NOL3/IL1R2/SHH/CLEC3B/CES1/GAS1/HPR/INPP5B/LGMN/RCE1/LMF1/TESC/LMF2/MIPEP/VSIR/PLAT/SPON1/PCSK4/TBC1D10A/SIRT4/PTCH1/SERPINE2/PCSK6/BACE2/SNX12/NCSTN/MMS19/ADAM17/YME1L1/FKRP/AFG3L2/NAA10/TMEM98/NAA16/DYNC2H1/CPXM1/CARD16/PSEN1/C1RL/C2CD3/CPM/SPCS3/DHPS/BOLA2B/LDLRAD3/RHBDD1/DOHH/HM13/PERP/OGT/CPD/ECE1/KLK2/MME/ADAM10/MAGEF1/APH1A/EP300…
GOBP_REGULATION_OF_ALPHA_BETA_T_CELL_ACTIVATION	GOBP_REGULATION_OF_ALPHA_BETA_T_CELL_ACTIVATION	98	0.357061	1.30926	0.0166719	0.178377	0.153216	8707	tags=57%, list=47%, signal=31%	LGALS9C/IL23A/CCR2/PRKCQ/NLRP3/MYB/SHH/ZAP70/CD274/LILRB1/PRKCZ/HFE/PRDM1/ADA/VSIR/PNP/LGALS9/IL4R/RASAL3/RARA/AGER/ZBTB7B/AP3D1/MAPK8IP1/TNFRSF14/NKAP/SYK/RC3H2/CBLB/RUNX1/IRF1/HLA-A/NFKBIZ/MALT1/LGALS9B/RC3H1/HLA-E/TWSG1/HLA-DRB1/AP3B1/ZBTB16/CD3E/SH3RF1/PTPRC/CCL19/JAK3/RIPK2/BCL6/GLI3/RUNX3/CD83/PTPN22/ZC3H12A/HLA-DRA/IFNG/NCKAP1L
GOMF_DAMAGED_DNA_BINDING	GOMF_DAMAGED_DNA_BINDING	66	0.384574	1.36803	0.0166719	0.178377	0.153216	7998	tags=58%, list=43%, signal=33%	NEIL3/BRCA1/POLD1/POLH/DDB2/DCLRE1C/XPC/OGG1/MSH3/RAD18/DDB1/MSH2/ERCC4/ERCC1/EP300/POT1/XRCC6/ERCC2/TP53BP1/SDE2/HMGB2/APEX1/POLB/DCLRE1B/CREBBP/REV1/RPS3/RBBP8/MPG/RAD1/NBN/RPA3/NEIL1/RAD23A/FEN1/RPA1/POLI/NEIL2
GOMF_GTPASE_ACTIVATING_PROTEIN_BINDING	GOMF_GTPASE_ACTIVATING_PROTEIN_BINDING	15	0.545264	1.53992	0.0166873	0.178377	0.153216	5460	tags=60%, list=29%, signal=42%	PLCD1/PIN1/TSC1/GNAO1/RGS14/GNAI3/FMNL1/FMNL3/GAPVD1
GOBP_PHOSPHATIDYLINOSITOL_ACYL_CHAIN_REMODELING	GOBP_PHOSPHATIDYLINOSITOL_ACYL_CHAIN_REMODELING	17	0.538797	1.56462	0.0167053	0.178377	0.153216	6105	tags=53%, list=33%, signal=36%	PLA2G2F/PLA2G4D/PLA2G10/PLA2G4A/PLA2G12A/PLBD1/LCLAT1/PLA2G1B/PLA2G4C
GOMF_PEPTIDE_LYSINE_N_ACETYLTRANSFERASE_ACTIVITY	GOMF_PEPTIDE_LYSINE_N_ACETYLTRANSFERASE_ACTIVITY	43	0.420497	1.42829	0.0167556	0.178628	0.153432	6216	tags=51%, list=33%, signal=34%	TADA2A/KAT5/MCM3AP/KAT6A/TADA3/NCOA3/TAF1/KAT2A/BRPF1/HAT1/BRD1/EP300/NCOA1/GTF3C4/SRCAP/KAT2B/CREBBP/NAA60/NAA50/MEAF6/KAT7/EPC1
GOBP_NEGATIVE_REGULATION_OF_MYOBLAST_DIFFERENTIATION	GOBP_NEGATIVE_REGULATION_OF_MYOBLAST_DIFFERENTIATION	24	0.480449	1.49142	0.0168773	0.179638	0.154299	8863	tags=71%, list=48%, signal=37%	NMRK2/SOSTDC1/TNF/SRA1/PRICKLE1/TBX3/PPARD/DLL1/SOX9/CXCL10/ANKRD2/SOX8/CXCL14/BMP4/DDIT3/MBNL3/CCL17
GOBP_VASCULAR_ENDOTHELIAL_GROWTH_FACTOR_RECEPTOR_SIGNALING_PATHWAY	GOBP_VASCULAR_ENDOTHELIAL_GROWTH_FACTOR_RECEPTOR_SIGNALING_PATHWAY	90	0.358771	1.3073	0.0169723	0.180254	0.154828	10852	tags=76%, list=58%, signal=32%	FOXC2/BAIAP2/NCF2/GRB10/PTK2B/VAV2/PRKD2/SHB/NRP2/FYN/SHC2/ARNT/EMILIN1/NEDD4/FZD4/PTPN1/RAC1/ABI1/NRP1/NCKAP1/VEGFC/NCK2/PDCD6/MAPKAPK2/MAPK14/CYFIP1/PRKD1/CNMD/ELMO2/ITGA5/HGS/PIK3CA/CRK/PAK2/SRC/PGF/VEGFD/SH2D2A/NCK1/VEGFA/VEGFB/CYFIP2/PIK3R2/MAPKAPK3/WASF2/AXL/NCKAP1L/ROCK2/CADM4/HSP90AA1/ITGB3/ITGAV/PIK3CB/CYBA/CDC42/HIF1A/MAPK11/VTN/CYBB/EPN2/HHEX/FGF10/DAB2IP/HSPB1/SULF1/BRK1/TNMD/FGF18
GOBP_SMOOTH_MUSCLE_CELL_DIFFERENTIATION	GOBP_SMOOTH_MUSCLE_CELL_DIFFERENTIATION	54	0.400733	1.3989	0.0169892	0.180254	0.154828	7999	tags=59%, list=43%, signal=34%	TBX18/FGF9/SHH/KIT/NFATC4/NFATC3/ACVR1/SGCB/SMARCD3/ENG/PDGFB/RAMP2/TBX3/PIAS1/SOD2/NFATC2/OLFM2/TBX2/SOX9/FOXO4/GPER1/ANKRD17/DNMT1/EPC1/EDNRB/BMP4/HES1/SRF/ADM/MED28/VEGFA/MESP1
GOCC_AP_TYPE_MEMBRANE_COAT_ADAPTOR_COMPLEX	GOCC_AP_TYPE_MEMBRANE_COAT_ADAPTOR_COMPLEX	39	0.431514	1.44866	0.017109	0.180955	0.155431	9451	tags=79%, list=51%, signal=39%	VPS18/SYNRG/AP1G2/AP4B1/AP1M1/AP2A2/AP1S1/VPS39/AP3M2/AP1B1/AP3D1/VPS33A/AP2B1/AP3S2/AP2M1/AP4E1/SGIP1/AP3M1/AP2S1/AP4M1/AP1M2/AP3B1/TBC1D5/AP3B2/AP3S1/TEPSIN/BTBD8/AP5S1/AFTPH/AP2A1/AP5M1
GOCC_CUL3_RING_UBIQUITIN_LIGASE_COMPLEX	GOCC_CUL3_RING_UBIQUITIN_LIGASE_COMPLEX	36	0.434315	1.44042	0.0171782	0.180955	0.155431	7534	tags=58%, list=40%, signal=35%	KLHL41/KLHL3/KLHL20/GAN/KLHL15/KLHL42/KCTD10/KLHL7/PEF1/KLHL9/KLHL21/KCTD13/ARIH1/PDCD6/KCTD5/CUL3/KLHL13/KLHL22/GLMN/KLHL25/DEPDC5
GOBP_ENDOSOME_ORGANIZATION	GOBP_ENDOSOME_ORGANIZATION	77	0.37225	1.33899	0.0172726	0.180955	0.155431	6518	tags=51%, list=35%, signal=33%	ANXA8/AQP11/HOOK2/ANXA8L1/VPS18/ALS2CL/RILP/SNX33/AKTIP/IST1/CHMP7/ARFGEF2/DNM1/VPS11/CHMP5/TMEM9/VPS4A/CHMP3/USP8/TSG101/STAM2/LAMTOR1/VPS37B/LAPTM4B/SNX3/SYNJ1/RAB22A/CHMP1B/PI4K2B/RNF26/PLEKHJ1/EXOC8/VPS37C/VPS37A/WASHC5/PRKN/HGS/PI4K2A/DNAJC13
GOBP_MITOCHONDRIAL_TRANSLATION	GOBP_MITOCHONDRIAL_TRANSLATION	132	0.340774	1.2768	0.0172726	0.180955	0.155431	11261	tags=69%, list=60%, signal=27%	MRPS24/MRPL38/AARS2/SARS2/MRPL11/MRPS31/AURKAIP1/MRPL21/MRPL46/MRPL49/MRPS7/MRPS12/RPUSD3/MPV17L2/MRPS27/RCC1L/MRPS18B/PTCD3/NOA1/MRPS21/MRPL48/SHMT2/MRPS17/TACO1/MRRF/MRPL17/MRPL51/GFM1/WARS2/MTIF2/MRPS35/MRPS22/MRPS15/MRPL18/MRPS9/MRPL13/MRPS28/MRPL58/MTRF1/UQCC2/TSFM/MRPL20/MRPL52/NGRN/RARS2/FASTKD2/TRMT10C/MRPL40/MRPL3/MRPL9/MRPL34/MRPL54/MRPL22/MRPL35/MRPL39/RPUSD4/MRPS2/MRPL2/QRSL1/GATC/MRP…
GOBP_POSITIVE_REGULATION_OF_PROTEIN_POLYMERIZATION	GOBP_POSITIVE_REGULATION_OF_PROTEIN_POLYMERIZATION	127	0.344162	1.28462	0.0172726	0.180955	0.155431	10832	tags=68%, list=58%, signal=29%	MAGEL2/CCL26/SPIRE2/PAK1/CARMIL1/BAIAP2/CCL24/JMY/DCTN1/GMFG/CDC42EP1/PTK2B/BAIAP2L1/FER/SCIN/NUMA1/ARL2/MYO1C/TPPP3/LMOD1/MAP1B/MAPT/HSPA1A/HIP1R/PYCARD/TRIM27/FCHSD2/GMFB/SNX9/RAC1/CCL21/ARPC4/GRB2/NCKAP1/ARPIN/WASF3/ARPC5L/RICTOR/NCK2/DLG1/RPS3/AP1AR/TPPP/CYFIP1/ARPC5/WHAMM/TOGARAM1/WASHC5/TPPP2/BIN1/ABI2/WASF1/ARPC1B/ARFIP2/PFN2/CTNNA2/NCK1/CCL11/CLASP1/CKAP5/OCLN/ICAM1/WASF2/CORO1A/HSPA1B/SP…
GOBP_REGULATION_OF_NOTCH_SIGNALING_PATHWAY	GOBP_REGULATION_OF_NOTCH_SIGNALING_PATHWAY	98	0.356185	1.30605	0.0172726	0.180955	0.155431	10311	tags=68%, list=55%, signal=31%	DLK1/TSPEAR/NOD2/CNTN6/ASCL1/KIT/MAML2/BMP7/BEND6/EGFL7/BMP2K/NOS3/CBFA2T2/SREBF2/ARRB1/PDCD10/SLC35C2/ARRDC1/YAP1/CD46/ADAM10/ITGB1BP1/EGFR/EP300/KAT2B/PRAG1/ENHO/DLL1/IL6ST/PRKCI/GALNT11/POSTN/CREBBP/TGFB2/TSPAN14/RITA1/SRC/METTL3/ROBO2/NFKBIA/BCL6/JAG2/SLC35C1/GAS2/AAK1/HES1/DLL4/LLGL2/SNW1/HES5/MESP1/DLX1/TM2D3/AKT1/HIF1AN/POGLUT1/MAML3/GATA2/ROBO1/TP63/DTX1/POFUT1/ZMIZ1/NEURL1/RBPJ/EPN2/ZBTB…
GOBP_RRNA_METABOLIC_PROCESS	GOBP_RRNA_METABOLIC_PROCESS	229	0.315406	1.21642	0.0172726	0.180955	0.155431	11386	tags=70%, list=61%, signal=28%	ERN2/SLFN13/DDX47/PELO/HELB/RNASEL/TRMT61B/URB1/EXOSC6/SIRT7/FBLL1/TBL3/DHX37/DDX52/SART1/GTPBP4/PIH1D2/MRM1/NOP9/IMP4/MTERF4/PES1/RPP30/EBNA1BP2/RIOK2/DDX18/BYSL/RPUSD3/MRM2/POP4/METTL5/MAPT/NOL11/TFB1M/ZCCHC4/KRR1/NGDN/ERCC2/ABT1/TEX10/MRM3/ISG20/KAT2B/EIF6/TSR3/TFB2M/SBDS/ERI2/NAT10/RCL1/YBEY/UTP11/RPL7L1/WBP11/RPS27/NOLC1/WDR46/GTF2H5/RPS9/RPS28/UTP4/WDR3/RIOK3/RPS19/RPL11/NOL8/RPL5/THUMPD1/R…
GOBP_TRANSPORT_ALONG_MICROTUBULE	GOBP_TRANSPORT_ALONG_MICROTUBULE	151	0.338032	1.27901	0.0172726	0.180955	0.155431	10750	tags=66%, list=58%, signal=28%	HAP1/AGBL4/TMEM108/MREG/CEP131/BICDL1/PRKCZ/MAP1A/KIF5C/BICDL2/RAB27B/DYNC1I1/AP3M2/AP3D1/DYNC1H1/DYNC2H1/TERF2/IFT57/KIF5A/AP3S2/BLOC1S6/IFT22/DST/MAP1B/MAPT/BBS12/AP3M1/ACTR10/SYBU/IFT74/RAB21/APBA1/TTC30A/RAB6A/AP3B1/WDR19/MAP2/COPG1/SPG11/KIF1A/NDE1/UXT/AP3B2/SOD1/DYNLL1/MAK/TTC21A/KIF17/WASF1/SSNA1/HNRNPU/DLG2/IFT20/AP3S1/KIF1B/ARL8B/CNIH2/FBXW11/KIF1C/APP/IFT122/SSX2IP/BLOC1S1/DYNLL2/BICD1/…
GOBP_RESPONSE_TO_COCAINE	GOBP_RESPONSE_TO_COCAINE	41	0.41932	1.41683	0.0173768	0.181761	0.156123	4154	tags=41%, list=22%, signal=32%	HTR1B/CHRNB2/CRHBP/DRD4/DRD2/HNMT/TIAM1/EN1/ABAT/PTK2B/CNR1/CDK5/HDAC5/CCNA2/SMPD1/PPP1R1B/HSP90AB1
GOMF_COMPLEMENT_BINDING	GOMF_COMPLEMENT_BINDING	20	0.494019	1.48129	0.0174384	0.182119	0.156431	8079	tags=65%, list=43%, signal=37%	MASP2/CR2/C4B/MEGF10/CALR/C8G/VSIG4/CR1/C5AR1/C4A/PHB/CD59/ITGB2
GOBP_ESTABLISHMENT_OF_TISSUE_POLARITY	GOBP_ESTABLISHMENT_OF_TISSUE_POLARITY	122	0.343485	1.28088	0.017573	0.182952	0.157146	10481	tags=66%, list=56%, signal=29%	GRHL3/WNT9B/GPC6/FOXF2/CELSR1/SPEF1/PRICKLE2/TIAM1/FZD3/PSMB10/PSMC1/AP2A2/INTU/SMURF1/AP2B1/NPHP1/CLTC/RYK/PSMA6/PSME4/PSME2/MLLT3/PRICKLE1/PSMB3/AP2M1/PSME3/FZD4/SEC24B/RPGRIP1L/DVL2/ANKRD6/AP2S1/PSMC6/RAC1/RSPO3/PSMC4/PSMB8/PSMD13/PSMC2/NKD1/PSMD11/PSMD3/PSMB7/PSMA2/PSMB1/PSMB2/FZD5/PSMB9/PSMD5/PSMC5/PSMD1/IFT20/SMURF2/PSMC3/VANGL1/PSMB6/CELSR2/PSMA7/PTK7/FUZ/DVL3/PKHD1/PSMD14/SFRP1/DAAM1/CDC4…
GOBP_POSITIVE_REGULATION_OF_DEFENSE_RESPONSE	GOBP_POSITIVE_REGULATION_OF_DEFENSE_RESPONSE	332	0.304346	1.18997	0.017573	0.182952	0.157146	9402	tags=55%, list=50%, signal=28%	KLK7/MUC5B/MUC5AC/MUC4/NOD2/LTA/MUC12/S100A9/FFAR3/SNCA/MMP12/MUC3A/IL6/NLRP12/IL23A/TLR10/CCR2/MUCL1/ITGA2/TRIM6/LPL/LAG3/TLR7/IRGM/MUC1/TNF/MNDA/RASGRP1/PAK1/NMI/ZBP1/LILRA5/TXK/MAPK3/BTK/IFI35/IRF3/COCH/CCL24/TLR3/CLEC10A/PSMB10/PSMC1/STAT5B/POLR3B/NCR3/GPSM3/POLR3F/NRAS/OSM/CD226/TLR2/CNR1/HEXIM1/PARP9/PLCG2/ICAM2/PSMA6/PSME4/FYN/PSME2/TAB3/PSPC1/SYK/PSMB3/PLSCR1/TAB1/PSME3/SKP1/EGFR/EP300/PY…
GOBP_ANTIGEN_PROCESSING_AND_PRESENTATION_OF_PEPTIDE_ANTIGEN_VIA_MHC_CLASS_I	GOBP_ANTIGEN_PROCESSING_AND_PRESENTATION_OF_PEPTIDE_ANTIGEN_VIA_MHC_CLASS_I	98	0.35545	1.30335	0.0178734	0.184637	0.158593	9304	tags=64%, list=50%, signal=32%	CD207/ERAP2/AZGP1/HFE/PSMB10/NCF2/PSMC1/HLA-C/CD36/LNPEP/PSMA6/PSME4/PSME2/PSMB3/SNAP23/MFSD6/PSME3/FCGR1B/SEC24B/ERAP1/VAMP3/CALR/PSMC6/HLA-A/FCER1G/SEC22B/PSMC4/PSMB8/HLA-E/CANX/PSMD13/PSMC2/TAP2/PSMD11/HLA-F/PSMD3/PDIA3/SEC23A/PSMB7/ITGB5/PSMA2/PSMB1/PSMB2/SEC24D/PSMB9/PSMD5/PSMC5/PSMD1/TAP1/PSMC3/PSMB6/PSMA7/IKBKB/IKBKG/SEC24A/SEC31A/CLEC4A/PSMD14/ITGAV/CYBA/TAPBP/SAR1B/PSMF1
GOBP_DNA_DEPENDENT_DNA_REPLICATION	GOBP_DNA_DEPENDENT_DNA_REPLICATION	153	0.336203	1.27302	0.0178734	0.184637	0.158593	8690	tags=52%, list=47%, signal=28%	DBF4B/PRIM2/ORC1/RTEL1/DDX11/POLD1/MMS22L/DACH1/CDT1/CCNE1/POLE/POLA2/RECQL5/HELB/POLD3/LRWD1/SENP2/SIRT7/POLD2/TONSL/FANCM/WIZ/RFC1/THOC1/MSH3/EME2/TERF2/UPF1/ETAA1/INO80/POLA1/ZNF365/GMNN/CENPS/RFC3/CDC6/REV3L/ORC2/CDC7/CDC34/POLB/WDHD1/WRNIP1/ORC5/SRPK2/MCM4/DBF4/ZNF830/KAT7/CHTF18/POLD4/NBN/RPA3/MCM9/DDX23/ORC6/BCL6/WDR18/CHEK2/FEN1/NOC3L/CCNE2/MCM5/ZRANB3/POLE3/MCM7/RPA1/POLG/PRIM1/GEN1/BOD1…
GOBP_POSITIVE_REGULATION_OF_PROTEIN_SERINE_THREONINE_KINASE_ACTIVITY	GOBP_POSITIVE_REGULATION_OF_PROTEIN_SERINE_THREONINE_KINASE_ACTIVITY	302	0.310034	1.20835	0.0178734	0.184637	0.158593	10664	tags=64%, list=57%, signal=28%	TCL1A/GRM4/ERN2/NRG1/CHRNA7/DRD4/NOD2/GNG3/SNCA/TDGF1/MST1R/ADRA2B/AVPI1/NTRK3/DBF4B/CAMK1/TGFB3/IRGM/TNF/KSR1/RASGRP1/PAK1/KIT/ERBB2/ADRB2/MAPK10/TIAM1/TGFA/MAPK3/AJUBA/FGD2/EPHA4/PKD1/UBE2V1/MAP2K7/AGER/PTK2B/ARRB1/ADAM17/PDGFB/AKAP13/CCNT1/MAP3K4/RALB/PDCD10/PSEN1/SHC1/S1PR2/ETAA1/CRKL/CSF1R/TAOK3/CCNYL1/TAB3/SHC2/SYK/MAP4K5/IRAK1/ERN1/TAB1/FZD4/CCNY/CDC6/CCNT2/CALM2/HSP90AB1/EGFR/DDX3X/LPAR3/…
GOCC_CLATHRIN_COATED_VESICLE_MEMBRANE	GOCC_CLATHRIN_COATED_VESICLE_MEMBRANE	112	0.350527	1.29597	0.0178734	0.184637	0.158593	6562	tags=47%, list=35%, signal=31%	ENTHD1/CHRM2/SYT2/CD207/APOB/TFRC/CD3G/HBEGF/ADRB2/CFTR/TGFA/SYNRG/LDLRAP1/AP1G2/NRGN/AP1M1/AP2A2/AP1S1/RASSF9/AP1B1/RAB35/EPN1/CLTB/LRP2/AP2B1/CLTC/CD4/CD3D/AP2M1/FCGR1B/FZD4/SGIP1/VAMP3/HIP1R/EGFR/AP2S1/HLA-DQA1/CD74/AP1M2/SLC18A1/SH3GL2/HLA-DRB1/AP3B1/TBC1D5/TGOLN2/M6PR/AVPR2/NCALD/AP3B2/DNAJC5/HLA-DQB1/FZD5/APOE
GOCC_VESICLE_TETHERING_COMPLEX	GOCC_VESICLE_TETHERING_COMPLEX	67	0.3753	1.33597	0.0178734	0.184637	0.158593	10498	tags=79%, list=56%, signal=35%	TRAPPC5/HOOK2/DNAJC28/VPS18/TRAPPC13/COG4/AKTIP/TNFAIP2/VPS39/TRAPPC2/EXOC4/COG2/COG1/VPS52/VPS33A/VPS11/COG7/TRAPPC6A/EXOC2/TRAPPC9/TRAPPC4/COG6/EXOC6/COG5/STX17/EXOC6B/GOLGA3/EXOC8/MYRIP/SYNPO2/TMEM115/RAB10/EXOC5/EXOC1/EXOC3/VPS53/EXOC7/EXOC3L1/TRAPPC3/VPS16/TRAPPC8/VPS54/HOOK3/TRAPPC6B/STXBP6/CDC42/TRAPPC3L/ZW10/RINT1/TRAPPC2L/HOOK1/VPS41/VPS8
GOBP_POSITIVE_REGULATION_OF_INTERLEUKIN_10_PRODUCTION	GOBP_POSITIVE_REGULATION_OF_INTERLEUKIN_10_PRODUCTION	36	0.433126	1.43648	0.0180903	0.186588	0.160269	7836	tags=61%, list=42%, signal=35%	NOD2/IL6/IL23A/CD274/LILRA5/PRKCZ/CLEC7A/LGALS9/TLR2/IL13/SYK/TUSC2/CD46/PYCARD/TREM2/PIBF1/TIGIT/HSPD1/CD34/BCL3/CD83/TLR4
GOBP_RESPONSE_TO_OXYGEN_LEVELS	GOBP_RESPONSE_TO_OXYGEN_LEVELS	370	0.300744	1.17984	0.0181738	0.187159	0.16076	9490	tags=55%, list=51%, signal=27%	PKLR/TH/NOS1/CHRNB2/CHRNA7/ALDH3A1/CYP1A1/MPL/LTA/NOS2/DRD2/ASCL2/ITGA2/ALAS2/KCNA5/ANGPTL4/TGFB3/MYB/DPP4/NOL3/BECN1/PAK1/CPEB1/APOLD1/AJUBA/PIN1/BMP7/ALAD/EPO/ADA/PSMB10/PSMC1/TEK/ZFP36L1/TSC1/PPARA/CDK4/DDIT4/SIRT4/PLOD1/AGER/REST/PTK2B/TLR2/P4HB/SIRT2/UCP2/ADAM17/CXCL12/PTGIS/BRIP1/CARD16/MTHFR/PSMA6/PSME4/PSME2/PLK3/ARNT/MDM4/PSMB3/ATP6V1A/CCNA2/HSD11B2/IRAK1/CREB1/PSME3/ALAS1/RAMP2/HIPK2/EE…
GOBP_GLOBAL_GENOME_NUCLEOTIDE_EXCISION_REPAIR	GOBP_GLOBAL_GENOME_NUCLEOTIDE_EXCISION_REPAIR	26	0.462294	1.45927	0.0182751	0.187912	0.161406	6961	tags=46%, list=37%, signal=29%	DDB2/XPC/GTF2H3/DDB1/ERCC4/ERCC1/ERCC2/CETN2/GTF2H5/UBA52/GTF2H4/GTF2H2
GOCC_AUTOPHAGOSOME_MEMBRANE	GOCC_AUTOPHAGOSOME_MEMBRANE	38	0.429633	1.43692	0.0183572	0.188465	0.161882	7015	tags=55%, list=38%, signal=35%	MAP1LC3B2/IRGM/MCOLN3/RUBCNL/ULK1/ATG16L2/MAP1LC3C/ATG16L1/TM9SF1/GABARAPL1/UVRAG/LAMP2/SH3GLB1/SNAP29/STX17/MAP1LC3A/PRKD1/RB1CC1/CALCOCO2/GABARAP/TMEM150B
GOBP_BLOOD_VESSEL_ENDOTHELIAL_CELL_MIGRATION	GOBP_BLOOD_VESSEL_ENDOTHELIAL_CELL_MIGRATION	109	0.354827	1.30898	0.0184742	0.188972	0.162316	9450	tags=59%, list=51%, signal=29%	TDGF1/FOXC2/ADTRP/GPLD1/TNF/CARD10/STAT5A/MAP3K3/NOS3/PTK2B/ID1/ADAM17/PDGFB/PRKD2/PDCD10/PIK3R3/HDAC5/CDH5/GPX1/ITGB1BP1/TBXA2R/PRCP/SOX18/PIK3C2A/MYH9/NRP1/VEGFC/GADD45A/JUP/ETS1/SRPX2/PRKD1/TMSB4X/SCARB1/NFE2L2/SP1/EGR3/MEOX2/HDAC9/APOE/SPRED1/AMOT/RHOJ/ANGPT2/DLL4/PRKCA/SRF/FGF2/VEGFA/CIB1/SLIT2/PPARG/ANGPT4/NR4A1/EMP2/ANGPT1/HMOX1/AKT1/HIF1A/GATA2/MECP2/MEF2C/ROBO1/EFNB2
GOBP_PEPTIDYL_SERINE_MODIFICATION	GOBP_PEPTIDYL_SERINE_MODIFICATION	319	0.303165	1.18383	0.0184742	0.188972	0.162316	9918	tags=59%, list=53%, signal=28%	TCL1A/NTF4/NOS1/NLRP2B/NAA11/SMTNL1/SNCA/TDGF1/IL6/CAMK1G/PRKCQ/NTRK3/CAMK1/TRIM6/IRGM/TFRC/TNF/BDKRB2/PAK1/PLK1/SPOCK3/PRKCZ/MAPK3/INPP5J/TNKS1BP1/ARAF/ULK1/DMPK/RPS6KB2/EPO/EGFLAM/PKD1/DDIT4/PARP2/FNIP1/OSM/CDK5/TAF1/MAPK7/PDGFB/PRKAA2/PRKD2/CSNK1G1/SPOCK2/NAA10/PDCD10/AURKC/PRKG2/GALNT16/IL11/DCLK1/WNK1/SYK/CSNK1E/PWP1/DYRK1B/MASTL/ERN1/GRK2/HIPK2/CLK1/HAX1/MAPK12/HSP90AB1/INPP5F/EGFR/HPF1/STK…
GOCC_INTRINSIC_COMPONENT_OF_MITOCHONDRIAL_INNER_MEMBRANE	GOCC_INTRINSIC_COMPONENT_OF_MITOCHONDRIAL_INNER_MEMBRANE	52	0.394191	1.36733	0.0185297	0.188972	0.162316	5907	tags=48%, list=32%, signal=33%	MTX3/DNAJC11/CHCHD6/APOOL/AFG3L2/CHCHD3/UQCC3/IMMT/COX16/MTX2/SCO2/SFXN1/SLC25A19/COX18/TIMM17B/GHITM/AGK/MCU/SMDT1/MPC2/SLC25A3/SFXN2/COX11/SAMM50/MCUB
GOBP_HISTONE_H3_K4_METHYLATION	GOBP_HISTONE_H3_K4_METHYLATION	51	0.406579	1.40665	0.0185483	0.188972	0.162316	8593	tags=63%, list=46%, signal=34%	BRCA1/MYB/WDR61/AUTS2/ARID4A/BCOR/PYGO2/OGT/KMT2E/ZNF335/SETD1B/SETD3/DPY30/DNMT3B/WDR5/DNMT1/TET3/NELFE/SETD1A/ASH1L/ASH2L/SMAD4/CTR9/SNW1/BEND3/PAXIP1/TET2/KDM6A/KMT2D/KMT2B/RLF/KMT2A
GOBP_HYDROGEN_PEROXIDE_METABOLIC_PROCESS	GOBP_HYDROGEN_PEROXIDE_METABOLIC_PROCESS	51	0.405611	1.4033	0.0185483	0.188972	0.162316	5124	tags=45%, list=27%, signal=33%	MPO/DUOXA2/HBQ1/CYP1A1/DUOX2/EPX/SNCA/DUOX1/HBB/HBA2/HBA1/MPV17L/PXDN/FYN/RAC2/GPX1/EGFR/NNT/RAC1/SOD2/PRDX1/PARK7/PRDX3
GOBP_TRANSCYTOSIS	GOBP_TRANSCYTOSIS	20	0.492273	1.47605	0.0186952	0.189538	0.162803	8394	tags=80%, list=45%, signal=44%	PIGR/GPIHBP1/MFSD2A/AGER/LRP2/CLTC/RAB11B/USO1/PTAFR/IGF1R/VPS35/SRC/FCGRT/RAB5A/LRPAP1/RAB17
GOBP_NUCLEOSIDE_TRIPHOSPHATE_METABOLIC_PROCESS	GOBP_NUCLEOSIDE_TRIPHOSPHATE_METABOLIC_PROCESS	84	0.368882	1.33813	0.0187746	0.189538	0.162803	9534	tags=62%, list=51%, signal=30%	PKLR/LDHC/CMPK2/AK1/ADA/PPARA/CTPS2/PID1/SLC25A12/MFN1/NME7/UQCC3/TYMS/RAN/ATP6V1A/EFL1/GNAI3/IMPDH1/ATP6V0C/TREM2/TBPL1/VCP/NUDT2/MT-ATP6/IMPDH2/AK8/ENO1/DGUOK/TMSB4X/SMPDL3A/PRKAG2/AK9/AK3/SLC25A13/AK5/ENTPD3/NME6/DNAJC30/DCTPP1/STOML2/GTPBP1/SPHK2/MT-CO2/SAMHD1/ALDOA/NUDT16/PPARGC1A/NME4/RAB23/ENTPD7/LRRK2/DTYMK
GOBP_POSITIVE_REGULATION_OF_B_CELL_ACTIVATION	GOBP_POSITIVE_REGULATION_OF_B_CELL_ACTIVATION	73	0.382305	1.3685	0.0187746	0.189538	0.162803	9402	tags=66%, list=50%, signal=33%	CHRNB2/TNFRSF13C/NOD2/IL6/TFRC/SLC39A10/BTK/ADA/KMT5C/STAT5B/TIRAP/EXOSC6/MLH1/TNFRSF4/INPP5D/PPP2R3C/RIF1/IL13/SYK/MSH2/TP53BP1/SH3KBP1/NFATC2/CD74/HMCES/GPR183/IRS2/CDKN1A/IL7/PTPRC/TICAM1/MIF/BCL6/IL5/PELI1/TNIP2/EXOSC3/TLR4/PAXIP1/CD27/BAD/WNT3A/NCKAP1L/TNFSF13B/IGLL5/CARD11/SASH3/MEF2C
GOBP_POSITIVE_REGULATION_OF_CELLULAR_PROTEIN_LOCALIZATION	GOBP_POSITIVE_REGULATION_OF_CELLULAR_PROTEIN_LOCALIZATION	288	0.307381	1.19578	0.0187746	0.189538	0.162803	10799	tags=62%, list=58%, signal=27%	CHP2/ABCA7/PDZK1/SLC51B/GNL3L/TFRC/TNF/SHH/CARD10/PAK1/ERBB2/PLK1/HSPA1L/CDT1/ABCA12/STAC/SNX33/PLS1/MAP1A/MGAT3/MEPCE/ABLIM3/HUWE1/RAB11FIP2/HDAC3/SREBF2/GPSM2/CDK5/MARK4/CNPY4/ECT2/PRKAA2/FIS1/PARP9/CCDC88A/CNST/VPS11/NUTF2/PSEN1/BBC3/SSH1/AP2B1/RBM22/MIEF2/NUMA1/NUP62/TESK1/FYN/MYO1C/YAP1/NIPBL/RAC2/RAN/CD2AP/RNF31/TPR/CHP1/MICALL2/PPP1R13B/MAPT/ITGB1BP1/HSP90AB1/EPB41L2/EGFR/TREM2/TSG101/TARD…
GOBP_REGULATION_OF_HORMONE_LEVELS	GOBP_REGULATION_OF_HORMONE_LEVELS	490	0.29364	1.16354	0.0187746	0.189538	0.162803	9655	tags=57%, list=52%, signal=28%	UGT1A8/AKR1B15/VIP/SSTR5/DUOXA2/CCKAR/NR0B2/ADH1A/CHST9/FOXE1/LRAT/AANAT/CARTPT/CRHBP/CYP1A1/UGT1A1/EPHA5/DUOX2/NOS2/UGT2B7/CYP46A1/AKR1B10/PCSK1N/DHRS2/CYP2W1/FFAR3/PAX8/KCNC2/DRD2/CYP3A5/ADH4/IL6/CHST8/RASL10B/SLC5A5/ADH6/CYP3A7/ALDH8A1/KCNA5/DUOX1/ABCC8/GPLD1/FDX2/RDH5/HSD17B1/NMU/MYB/HSD17B3/ILDR2/TNF/GAL/DPP4/ALDH1A2/PASK/CORIN/RAB11FIP1/IL1RN/TCIRG1/TFAP2B/SHH/ZBED6/CES1/CYP26B1/CRYM/PLB1/C…
GOCC_LATE_ENDOSOME_MEMBRANE	GOCC_LATE_ENDOSOME_MEMBRANE	128	0.339378	1.26787	0.0187746	0.189538	0.162803	11537	tags=77%, list=62%, signal=29%	ANXA8/SPAAR/GIMAP5/SLC30A4/MREG/VPS18/GOSR2/RILP/ABHD6/VAC14/SLC38A9/MCOLN3/CYB561A3/MVB12B/RHOB/WDR91/RAB27B/VPS39/SLC29A3/UBXN6/YIPF1/ABCA5/CDIP1/VPS33A/VPS11/TMEM9/VPS4A/CHMP3/ANXA2/TSG101/LAMTOR1/VPS37B/LAMP2/LAPTM4B/CHMP1B/VTI1B/HLA-DRB1/RNF13/ATG9A/HLA-DMA/PIKFYVE/VPS37C/VPS37A/CLCN4/HGS/LAMTOR5/SNX16/TMEM106B/SLC1A1/ARL8B/LAPTM4A/VPS36/MITD1/LAMP5/VPS16/PMEL/AP5S1/HLA-DRA/SPPL2A/TMEM59/MIC…
GOMF_NUCLEOBASE_CONTAINING_COMPOUND_TRANSMEMBRANE_TRANSPORTER_ACTIVITY	GOMF_NUCLEOBASE_CONTAINING_COMPOUND_TRANSMEMBRANE_TRANSPORTER_ACTIVITY	48	0.400824	1.38291	0.0188122	0.189548	0.162811	7754	tags=58%, list=42%, signal=34%	SLC28A1/ABCC11/SLC35E3/SLC25A4/SLC29A3/SLC29A2/SLC19A1/SLC33A1/SLC17A9/SLC25A19/SLC25A36/SLC25A5/SLC35D1/SLC25A6/SLC35A1/SLC35A5/SLC25A32/ABCC4/SLC22A2/SIDT2/SLC25A41/SLC25A42/SLC35A2/SLC35A3/SLC29A1/SLC35C1/SLC28A2/SLC29A4
GOBP_KILLING_OF_CELLS_IN_OTHER_ORGANISM_INVOLVED_IN_SYMBIOTIC_INTERACTION	GOBP_KILLING_OF_CELLS_IN_OTHER_ORGANISM_INVOLVED_IN_SYMBIOTIC_INTERACTION	25	-0.312522	-1.60786	0.0188455	0.189548	0.162811	905	tags=40%, list=5%, signal=38%	CXCL6/KRT6A/ARG1/REG3G/DEFA5/DEFB103B/DEFA1B/DEFB103A/CFHR2/DCD
GOCC_SAGA_TYPE_COMPLEX	GOCC_SAGA_TYPE_COMPLEX	26	0.460442	1.45342	0.0188893	0.189548	0.162811	6986	tags=58%, list=37%, signal=36%	TADA2A/TAF6L/HCFC1/TADA3/ATXN7L3/SUPT3H/KAT2A/TADA1/TAF5L/TADA2B/KAT2B/TAF5/TAF9B/TAF4/TAF2
GOMF_ALPHA_ACTININ_BINDING	GOMF_ALPHA_ACTININ_BINDING	26	0.460845	1.4547	0.0188893	0.189548	0.162811	6790	tags=54%, list=36%, signal=34%	NRAP/KCNA5/LDB3/TTN/PDLIM2/ADORA2A/KCNN2/RARA/PALLD/PDLIM7/PDLIM1/SYNPO2/PRICKLE4/PDLIM5
GOBP_MATURE_B_CELL_DIFFERENTIATION_INVOLVED_IN_IMMUNE_RESPONSE	GOBP_MATURE_B_CELL_DIFFERENTIATION_INVOLVED_IN_IMMUNE_RESPONSE	24	0.474037	1.47152	0.019045	0.19017	0.163346	8726	tags=79%, list=47%, signal=42%	IL6/ADA/CDH17/PTK2B/PLCG2/NOTCH2/FCGR2B/DLL1/CR1/ST3GAL1/GPR183/ITM2A/BCL3/DOCK10/LGALS1/ITFG2/DOCK11/POU2AF1/NKX2-3
GOBP_LAMELLIPODIUM_ASSEMBLY	GOBP_LAMELLIPODIUM_ASSEMBLY	70	0.377585	1.34918	0.019075	0.19017	0.163346	9277	tags=63%, list=50%, signal=32%	FRMD7/KIT/CARMIL1/SPEF1/AJUBA/FSCN1/ABLIM3/VAV2/FER/AUTS2/CCDC88A/P2RY12/HDAC4/SPATA13/CAPZB/RAC2/ABLIM1/AKIRIN1/PARVB/RAC1/NCKAP1/WASF3/TWF1/NCK2/CYFIP1/GOLPH3/WHAMM/ARHGEF7/PIK3CA/ABI2/AVIL/ARFIP2/PLXNB3/NCK1/SLIT2/OCLN/SH2B1/S1PR1/WASF2/ARHGEF4/CARMIL2/NUP85/ARHGEF6/CDC42
GOBP_REGULATION_OF_ACTIN_FILAMENT_BUNDLE_ASSEMBLY	GOBP_REGULATION_OF_ACTIN_FILAMENT_BUNDLE_ASSEMBLY	96	0.357266	1.30887	0.019075	0.19017	0.163346	9557	tags=56%, list=51%, signal=28%	SYNPO2L/FRMD7/SHANK1/ARHGEF18/TGFB3/CGNL1/PAK1/CARMIL1/EPHA1/ARHGAP6/FHOD1/DLC1/ARHGEF10/TSC1/ID1/SYNPO/CLASP2/CCDC88A/SDC4/TESK1/RHOC/NF2/TACSTD2/SWAP70/ITGB1BP1/RAC1/NRP1/STMN1/PLEK/ALMS1/ARHGAP28/SYNPO2/SERPINF2/PRKN/PPM1F/CX3CL1/INPP5K/PAK2/TGFBR1/LIMCH1/S100A10/PPP1R9A/PFN2/CLASP1/S1PR1/WASF2/ROCK2/RAPGEF3/ARHGEF10L/SFRP1/CDC42/ASAP3/TMEFF2/LIMK1
GOBP_SMALL_MOLECULE_CATABOLIC_PROCESS	GOBP_SMALL_MOLECULE_CATABOLIC_PROCESS	419	0.296135	1.16671	0.019075	0.19017	0.163346	10443	tags=60%, list=56%, signal=27%	PKLR/APOBEC2/UPP2/CYP4F3/NOS1/TAT/ACMSD/PON3/FUT6/CYP1A1/UROC1/UPB1/CYP7A1/NOS2/CYP46A1/AKR1B10/THNSL2/CYP2W1/ADH4/MIOX/OXCT2/PIPOX/HAO2/HOGA1/EHHADH/CYP4F12/ADTRP/ALDH8A1/AMT/ACAD11/BCKDHA/ALDOC/RENBP/MTHFS/CRAT/ETFB/ACOX3/FUT9/RBKS/HNMT/CBR3/GALK1/CYP26B1/CRYM/PLA2G15/LPIN3/XDH/AMDHD2/HPD/INPP5B/BCAT1/AGXT/HK1/MAT1A/MFSD2A/INPP5J/ACADL/APOBEC3C/ALDH1L1/CPT1B/SDSL/SLC27A2/ECHDC2/NT5C/ADA/ACADVL/…
GOMF_SIGNAL_SEQUENCE_BINDING	GOMF_SIGNAL_SEQUENCE_BINDING	47	0.413471	1.42372	0.019094	0.19017	0.163346	7479	tags=51%, list=40%, signal=31%	POM121/CABP1/SEC61A2/TOMM20L/AP2B1/AP2M1/SEC61A1/KPNA3/TNPO2/SRP54/PEX19/KDELR2/TOMM70/NOLC1/KPNB1/NUP214/RANBP6/PEX5/TIMM22/BRAP/TOMM40L/KCNIP2/NFKBIA/IPO5
GOBP_RETINOL_METABOLIC_PROCESS	GOBP_RETINOL_METABOLIC_PROCESS	46	0.414412	1.42241	0.0191323	0.190267	0.163429	3155	tags=39%, list=17%, signal=33%	AKR1B15/ADH1A/LRAT/CYP1A1/AKR1B10/CYP3A5/ADH4/ADH6/CYP3A7/RDH5/ALDH1A2/PLB1/RDH11/CYP1B1/BCO1/ADH1C/RDH13/DHRS3
GOBP_DNA_REPLICATION_INITIATION	GOBP_DNA_REPLICATION_INITIATION	40	0.420664	1.41769	0.0192093	0.190747	0.163842	8374	tags=62%, list=45%, signal=34%	PRIM2/ORC1/CDT1/CCNE1/POLE/POLA2/LRWD1/POLA1/CDC6/ORC2/CDC34/WRNIP1/ORC5/MCM4/KAT7/NBN/ORC6/WDR18/NOC3L/CCNE2/MCM5/POLE3/MCM7/PRIM1/MCM2
GOMF_NAD_DEPENDENT_PROTEIN_DEACETYLASE_ACTIVITY	GOMF_NAD_DEPENDENT_PROTEIN_DEACETYLASE_ACTIVITY	16	0.544925	1.56203	0.0193944	0.192299	0.165175	7677	tags=81%, list=41%, signal=48%	HDAC11/SIRT7/HDAC3/SIRT2/HDAC4/HDAC5/HDAC2/HDAC8/HDAC1/HDAC9/SIRT3/HDAC6/SIRT5
GOBP_DEVELOPMENTAL_CELL_GROWTH	GOBP_DEVELOPMENTAL_CELL_GROWTH	211	0.320096	1.22976	0.0196757	0.194221	0.166826	8589	tags=51%, list=46%, signal=28%	POU4F3/DRAXIN/SYT2/SLIT1/FLRT1/FLRT3/NTN1/TMEM108/TNN/PLXNA3/PI16/ISLR2/PAK1/SEMA4F/SYT17/SLIT3/TIAM1/PRKCZ/PIN1/ULK1/EPHA7/IST1/COBL/SEMA3B/SEMA3F/PPARA/CPNE6/PARP2/SEMA4B/CDK5/SMURF1/CXCL12/AKAP13/AUTS2/SEMA4D/TRPV2/CDH4/GDI1/USP9X/RYK/NRP2/WNT3/SLC23A2/DCLK1/LLPH/MAP1B/PPP3CB/MAPT/RNF6/HSP90AB1/LPAR3/AURKA/YY1/SORBS2/RTN4R/MAP2K4/RAB21/NRP1/G6PD/BDNF/EIF2AK4/SYT4/SH3GL2/POSTN/SOX9/CYFIP1/TTL/M…
GOBP_REGULATION_OF_PEPTIDE_SECRETION	GOBP_REGULATION_OF_PEPTIDE_SECRETION	289	0.305378	1.18811	0.0196757	0.194221	0.166826	9935	tags=60%, list=53%, signal=28%	NPY2R/SSTR5/IL1A/NR0B2/CARTPT/CRHBP/EPHA5/DRD4/NOS2/FFAR3/PAX8/KCNC2/DRD2/IL6/RASL10B/ACHE/ADTRP/OR51E2/KCNA5/ABCC8/GPLD1/TGFB3/NMU/TNF/DPP4/PASK/RAB11FIP1/TCIRG1/TFAP2B/ZBED6/CYP51A1/TTN/MYOM1/C1QTNF3/CFTR/ACVR1C/TIAM1/ADORA2A/HFE/GPR68/LRP5L/SLC12A2/TM7SF3/ADAM9/SLC25A4/DISP1/RHBDF1/STXBP5L/CD33/ANO1/CAMK2N1/NLGN2/PER2/RAB11FIP5/SIRT4/APBB1/REST/OXCT1/TLR2/CNR1/UCP2/TMED10/DPH3/PLA2G6/P3H1/ARL2…
GOCC_ACTIN_FILAMENT	GOCC_ACTIN_FILAMENT	112	0.348949	1.29013	0.0196757	0.194221	0.166826	7180	tags=46%, list=39%, signal=29%	ACTBL2/MYO1A/MYO3A/POF1B/SMTNL2/ESPN/ACTA1/SMTNL1/APC2/LDB3/VPS18/PAK1/CARMIL1/PDLIM2/ARHGAP6/PLS1/JAM3/COBL/LCP1/TEK/TSC1/KPTN/COTL1/WHRN/FYN/MYO1C/RAC2/LMOD1/CD2AP/RCSD1/GAS2L1/PALLD/WIPF3/PDLIM7/RAC1/NCKAP1/TMOD1/TWF1/RAC3/PDLIM1/PAWR/MYO1B/EHBP1/GAS2L2/PRICKLE4/SPECC1/AVIL/PDLIM5/SRC/AMOT/WIPF2/GAS2
GOBP_NEPHRON_MORPHOGENESIS	GOBP_NEPHRON_MORPHOGENESIS	69	0.374599	1.33588	0.0199761	0.19651	0.168792	8130	tags=54%, list=44%, signal=30%	HOXD11/WNT6/SALL1/PAX8/KLHL3/WNT9B/SHH/WNK4/TCF21/BMP7/PKD1/WT1/GZF1/PTCH1/LZTS2/LAMA5/TACSTD2/IRX3/HOXB7/STAT1/SIX4/DLG1/SOX9/LGR4/OSR1/SOX8/AHI1/ADAMTS16/BMP4/SMAD4/HES1/GLI3/HES5/FGF2/VEGFA/SMO/NOG
GOBP_RESPONSE_TO_REACTIVE_OXYGEN_SPECIES	GOBP_RESPONSE_TO_REACTIVE_OXYGEN_SPECIES	207	0.318923	1.22535	0.0199761	0.19651	0.168792	10829	tags=67%, list=58%, signal=28%	MPO/S100A7/KCNC2/GPR37L1/IL6/KCNA5/DUSP1/HBB/MYB/SPHK1/BECN1/HBA2/HBA1/MAPK3/MB/BTK/CYP1B1/BMP7/ANKZF1/RHOB/ADA/ADAM9/TXNRD2/ZNF580/CBX8/GNAO1/NOS3/PTK2B/CD36/SESN1/FANCC/UCP2/MAPK7/FER/ECT2/PDCD10/SDC1/PPP5C/PPP2CB/FYN/PLK3/PPIF/SIGMAR1/SETX/CCNA2/ERN1/MAPT/MTR/GPX1/EGFR/RIPK3/SOD2/PDE8A/PRDX1/PARK7/MAPK13/ERCC6L2/HDAC2/APEX1/TRPM2/DHFR/PRDX3/FBLN5/PRKCD/GCH1/ETS1/COL1A1/RPS3/PAWR/ROMO1/MAP1LC3A…
GOBP_NEGATIVE_REGULATION_OF_RESPONSE_TO_DNA_DAMAGE_STIMULUS	GOBP_NEGATIVE_REGULATION_OF_RESPONSE_TO_DNA_DAMAGE_STIMULUS	72	0.376733	1.34786	0.0199961	0.19651	0.168792	7737	tags=56%, list=42%, signal=33%	MUC1/RTEL1/DDIAS/TFIP11/RECQL5/HELB/UBQLN4/OGG1/CDKN2D/KLHL15/PARPBP/CXCL12/THOC1/ZNF385A/TERF2/RIF1/PPP1R10/TMEM161A/ING2/ERCC4/ERCC1/MAGEF1/TRIP12/DYRK3/TP53BP1/DYRK1A/UBR5/USP47/CD74/RPS3/NUDT16L1/TAF9B/MIF/CLU/SMCHD1/FANCB/DDX39B/CHEK2/HSF1/TRIAP1
GOBP_NK_T_CELL_ACTIVATION	GOBP_NK_T_CELL_ACTIVATION	11	0.582629	1.53741	0.02008	0.196656	0.168917	2790	tags=36%, list=15%, signal=31%	IL23A/RASAL3/ZBTB7B/ELF4
GOBP_SYNAPTIC_TRANSMISSION_CHOLINERGIC	GOBP_SYNAPTIC_TRANSMISSION_CHOLINERGIC	28	0.464881	1.48107	0.0201385	0.196656	0.168917	2994	tags=36%, list=16%, signal=30%	SLC5A7/CHRNB4/CHRNB2/CHRNA7/CHRNA3/ACHE/CHRNA6/ADORA2A/CHRNA10/COLQ
GOMF_TUMOR_NECROSIS_FACTOR_ACTIVATED_RECEPTOR_ACTIVITY	GOMF_TUMOR_NECROSIS_FACTOR_ACTIVATED_RECEPTOR_ACTIVITY	10	0.593367	1.53748	0.0201706	0.196656	0.168917	5475	tags=60%, list=29%, signal=42%	EDA2R/TNFRSF25/TNFRSF4/TNFRSF14/TNFRSF1B/FAS
GOBP_PROTEIN_LOCALIZATION_TO_CHROMATIN	GOBP_PROTEIN_LOCALIZATION_TO_CHROMATIN	25	0.465135	1.45532	0.0202004	0.196656	0.168917	8591	tags=80%, list=46%, signal=43%	PLK1/CDCA5/CHMP7/MCM8/ESR1/LRWD1/MAU2/NIPBL/MSH2/RUVBL2/PPHLN1/SETD2/VCP/HDAC8/VCPIP1/RB1/MCM9/ESCO2/WAPL/EZH2
GOBP_POSITIVE_REGULATION_OF_INTERLEUKIN_17_PRODUCTION	GOBP_POSITIVE_REGULATION_OF_INTERLEUKIN_17_PRODUCTION	17	0.530957	1.54185	0.0202053	0.196656	0.168917	2742	tags=41%, list=15%, signal=35%	NOD2/IL6/IL23A/PRKCQ/SPHK1/LY9/OSM
GOBP_ENSHEATHMENT_OF_NEURONS	GOBP_ENSHEATHMENT_OF_NEURONS	123	0.342302	1.27591	0.0202765	0.196656	0.168917	7659	tags=47%, list=41%, signal=28%	NCMAP/MALL/PLP1/ERBB2/KCNJ10/GAL3ST1/JAM3/ARHGEF10/TSC1/PLLP/GALC/ATRN/TLR2/SIRT2/NCSTN/MPP5/SLC25A12/AFG3L2/TMEM98/MTMR2/ITGAX/EGR2/ADGRG6/DICER1/DEGS1/PPARD/ERCC2/RNF10/WASF3/TNFRSF1B/DLG1/FAM126A/GNPAT/MYRF/TPPP/PRX/CTSC/CYFIP1/PIKFYVE/ADAM22/LGI4/KIF14/SCN8A/PMP22/MOBP/ASPA/CNTNAP1/NDRG1/SOD1/ORMDL3/CLU/EIF2B5/PARD3/JAM2/SH3TC2/HES5/EIF2AK3/NAB2
GOBP_POSITIVE_REGULATION_OF_ACTIN_FILAMENT_POLYMERIZATION	GOBP_POSITIVE_REGULATION_OF_ACTIN_FILAMENT_POLYMERIZATION	92	0.353363	1.29058	0.0202765	0.196656	0.168917	8786	tags=57%, list=47%, signal=30%	MAGEL2/CCL26/SPIRE2/CARMIL1/BAIAP2/CCL24/JMY/GMFG/CDC42EP1/PTK2B/BAIAP2L1/FER/SCIN/MYO1C/LMOD1/HIP1R/PYCARD/TRIM27/FCHSD2/GMFB/SNX9/CCL21/ARPC4/GRB2/NCKAP1/ARPIN/WASF3/ARPC5L/RICTOR/NCK2/DLG1/AP1AR/CYFIP1/ARPC5/WHAMM/WASHC5/BIN1/ABI2/WASF1/ARPC1B/ARFIP2/PFN2/CTNNA2/NCK1/CCL11/ICAM1/WASF2/CORO1A/SPIRE1/WASL/NCKAP1L/CARMIL2
GOBP_REGULATION_OF_ERBB_SIGNALING_PATHWAY	GOBP_REGULATION_OF_ERBB_SIGNALING_PATHWAY	92	0.353224	1.29007	0.0202765	0.196656	0.168917	9520	tags=62%, list=51%, signal=30%	HAP1/AFAP1L2/ERBB2/HBEGF/TGFA/LGMN/MVB12B/RHBDF1/PTPN18/EPN1/ADAM17/FER/SNX5/CCDC88A/DUSP3/SPRY1/PSEN1/RNF126/NUP62/WDR54/GPRC5A/SOCS4/DGKD/CBLB/HIP1R/EGFR/SOS1/CEACAM1/TSG101/STAM2/SH3KBP1/GRB2/PLAUR/AGR2/SH3GL2/IFI6/GPER1/ARHGEF7/ZFYVE28/RHBDF2/HGS/ADRA2A/VPS25/CBL/SH3TC2/SHKBP1/NEU3/PTPN12/EPS15L1/BCAR3/BTC/PTPRJ/ITGA1/AKT1/CDC42/PTK6/SOCS5
GOBP_TRNA_METABOLIC_PROCESS	GOBP_TRNA_METABOLIC_PROCESS	153	0.334227	1.26554	0.0202765	0.196656	0.168917	10470	tags=65%, list=56%, signal=29%	SLFN13/TYW1B/PARS2/CTU2/TRMT10B/TRMT61B/AARS2/TSEN54/SARS2/TSEN34/KTI12/QTRT1/ELP3/CPSF4/METTL6/HSD17B10/TRMO/ELP6/DPH3/NSUN6/RPP30/TYW5/RPP21/TRMT61A/ELP5/TRNT1/TP53RK/AIMP2/POP4/TRIT1/HARS2/ZBTB8OS/RTCB/AIMP1/ANKRD16/NAT10/PPA2/TYW1/MOCS3/GRSF1/WARS2/ELAC2/QTRT2/TSEN15/TRPT1/TRUB1/FARSB/THUMPD1/ELP2/CARS2/DUS2/RARS2/TSEN2/NARS2/TRDMT1/SEPSECS/TRMT10C/TRMT10A/TPRKB/TRMT12/RPUSD4/PPA1/QRSL1/GATC/…
GOBP_NUCLEOSIDE_TRIPHOSPHATE_BIOSYNTHETIC_PROCESS	GOBP_NUCLEOSIDE_TRIPHOSPHATE_BIOSYNTHETIC_PROCESS	60	0.385547	1.36049	0.0203171	0.196763	0.169009	9043	tags=62%, list=49%, signal=32%	PKLR/LDHC/CMPK2/AK1/PPARA/CTPS2/PID1/SLC25A12/NME7/UQCC3/TYMS/ATP6V1A/IMPDH1/ATP6V0C/TREM2/TBPL1/VCP/NUDT2/MT-ATP6/IMPDH2/AK8/ENO1/DGUOK/TMSB4X/PRKAG2/AK9/AK3/SLC25A13/AK5/NME6/DNAJC30/STOML2/SPHK2/MT-CO2/ALDOA/PPARGC1A/NME4
GOBP_DENDRITE_MORPHOGENESIS	GOBP_DENDRITE_MORPHOGENESIS	136	0.342138	1.28417	0.0205769	0.198127	0.17018	8670	tags=57%, list=47%, signal=31%	CHRNB2/CHRNA7/ITPKA/SHANK1/ADGRB3/NGEF/KNDC1/CHRNA3/ZDHHC15/DLG4/LZTS3/IL1RAPL1/LRP8/NFATC4/PARP6/TIAM1/BHLHB9/EPHA4/MINK1/ARC/ID1/DCDC2/CDK5/HECW2/TANC2/GORASP1/SHANK2/SEMA4D/ZNF365/FYN/SS18L1/DCLK1/KLF7/NEDD4/VLDLR/CUX1/ADAM10/SRCIN1/LZTS1/EEF2K/CUX2/RBFOX2/RAB21/NRP1/CTNND2/SLITRK5/MEF2A/DNM1L/RAP2A/DIP2A/MAP2/PTPRD/KIF1A/ANAPC2/HPRT1/MAP6/FBXO31/ANKRD27/ABI2/SIPA1L1/PDLIM5/TMEM106B/KIDINS220/…
GOBP_INTRINSIC_APOPTOTIC_SIGNALING_PATHWAY	GOBP_INTRINSIC_APOPTOTIC_SIGNALING_PATHWAY	271	0.311071	1.20746	0.0205769	0.198127	0.17018	9083	tags=56%, list=49%, signal=29%	ERN2/S100A9/EDA2R/ATP2A1/BRCA1/MUC1/TNF/NOL3/BDKRB2/MSX1/BECN1/DDIAS/MLLT11/NFATC4/CYP1B1/RNF183/NACC2/EPO/WWOX/JMY/CDKN2D/ATP2A3/DDIT4/FIGNL1/MLH1/CREB3/P4HB/MAPK7/CXCL12/SGMS1/FIS1/MAPK8IP1/CDIP1/PDCD10/ZNF385A/BBC3/TMEM161A/BCL2L2/SGPP1/TMEM109/IVNS1ABP/PPIF/MSH2/PERP/ING2/PDX1/ERN1/PPP1R13B/HIPK2/HSPA1A/GPX1/EP300/DDX3X/PYCARD/NDUFS3/VDAC2/RIPK3/PTPN1/HTRA2/SOD2/PARK7/HYOU1/LCK/USP47/PLAUR/SE…
GOBP_LAMELLIPODIUM_ORGANIZATION	GOBP_LAMELLIPODIUM_ORGANIZATION	86	0.362811	1.31814	0.0205769	0.198127	0.17018	9277	tags=62%, list=50%, signal=31%	FRMD7/KIT/CARMIL1/SPEF1/AJUBA/FSCN1/ABLIM3/VAV2/FER/AUTS2/CCDC88A/P2RY12/HDAC4/SPATA13/CAPZB/RAC2/ABLIM1/AKIRIN1/PARVB/RAC1/NCKAP1/ARPIN/WASF3/RREB1/TWF1/NCK2/CYFIP1/GOLPH3/ARPC5/WHAMM/ARHGEF7/PIK3CA/ABI2/AVIL/SRC/WASF1/ARFIP2/SNX2/PLXNB3/NCK1/KANK1/SLIT2/OCLN/SH2B1/S1PR1/SNX1/WASF2/ARHGEF4/PDPN/CARMIL2/NUP85/ARHGEF6/CDC42
GOBP_POSITIVE_REGULATION_OF_TUMOR_NECROSIS_FACTOR_SUPERFAMILY_CYTOKINE_PRODUCTION	GOBP_POSITIVE_REGULATION_OF_TUMOR_NECROSIS_FACTOR_SUPERFAMILY_CYTOKINE_PRODUCTION	86	0.362619	1.31744	0.0205769	0.198127	0.17018	9338	tags=64%, list=50%, signal=32%	ORM1/ORM2/IL1A/NOD2/IL6/IL23A/AZU1/C1QTNF4/CCR2/LPL/RASGRP1/LILRA5/NFATC4/CLEC7A/TLR3/TIRAP/LGALS9/ARFGEF2/AGER/CD36/TLR2/CD14/PSEN1/SYK/PYCARD/LY96/HDAC2/PTPN11/LBP/SELENOK/HLA-E/JAK2/PTAFR/MAPKAPK2/PTPRC/IFNGR1/CCL19/TICAM1/MIF/FZD5/CLU/RIPK2/MYD88/APP/NOD1/TLR4/TYROBP/ARHGEF2/IFNG/PTPRJ/TLR1/IFIH1/CYBA/SASH3/ISL1
GOMF_DYNEIN_LIGHT_INTERMEDIATE_CHAIN_BINDING	GOMF_DYNEIN_LIGHT_INTERMEDIATE_CHAIN_BINDING	27	0.454265	1.43933	0.0207746	0.199742	0.171568	3169	tags=44%, list=17%, signal=37%	DNAH10/DNAH6/HOOK2/DNAH2/DNAH5/RILP/DNHD1/CCDC88B/DNAH1/DYNC1H1/CCDC88A/DYNC2H1
GOMF_MACROMOLECULE_TRANSMEMBRANE_TRANSPORTER_ACTIVITY	GOMF_MACROMOLECULE_TRANSMEMBRANE_TRANSPORTER_ACTIVITY	25	0.463284	1.44953	0.0208172	0.199863	0.171672	8171	tags=68%, list=44%, signal=38%	ABCA1/AZGP1/SEC61A2/TOMM20L/SEC61G/TMED10/SEC61A1/TOMM22/TIMM17B/TOMM70/MCL1/TIMM22/SEC63/TOMM40L/SIDT2/TIMM17A/TIMM23
GOBP_POSITIVE_REGULATION_OF_CELL_PROJECTION_ORGANIZATION	GOBP_POSITIVE_REGULATION_OF_CELL_PROJECTION_ORGANIZATION	331	0.303143	1.18523	0.0208773	0.20011	0.171884	11014	tags=65%, list=59%, signal=27%	EPS8L3/HAP1/SAXO1/ITPKA/FRMD7/S100A9/CHODL/NTN1/ITGA2/TENM2/NTRK3/CAMK1/ZDHHC15/TGFB3/DLG4/PLXNA3/ISLR2/ZNF804A/ALKAL2/IL1RAPL1/FUT9/NDRG4/PAK1/RIPOR2/KIT/CRTC1/EPS8L1/CARMIL1/DEF8/LRP8/BCAS3/PARP6/TIAM1/RETREG3/BMP7/FSCN1/BHLHB9/EPHA4/EPO/IST1/COBL/EPS8L2/PLEK2/CDC42EP1/ATP1B2/CBFA2T2/PTK2B/CNR1/MARK4/CXCL12/AUTS2/SEMA4D/TRPV2/CCDC88A/P2RY12/CDH4/PLXND1/SCN1B/GDI1/P3H1/NEGR1/HDAC4/WNT3/FYN/KAT2A…
GOMF_DNA_REPLICATION_ORIGIN_BINDING	GOMF_DNA_REPLICATION_ORIGIN_BINDING	23	0.488598	1.50473	0.020903	0.20011	0.171884	8374	tags=65%, list=45%, signal=36%	ORC1/DDX11/MCM8/POLA1/CDC6/ORC2/ORC5/GRWD1/MCM4/KAT7/MCM9/HSPD1/MCM5/MCM7/MCM2
GOMF_CARBOXY_LYASE_ACTIVITY	GOMF_CARBOXY_LYASE_ACTIVITY	32	0.441776	1.44422	0.021152	0.20187	0.173395	7843	tags=59%, list=42%, signal=34%	ACMSD/BCKDHA/AZIN2/GADL1/PPCDC/UROD/SGPL1/ECHDC1/GOT1/PAICS/ODC1/ME2/MVD/AMD1/FAHD1/PDXDC1/AZIN1/ME3/CSAD
GOBP_NEGATIVE_REGULATION_OF_DNA_METABOLIC_PROCESS	GOBP_NEGATIVE_REGULATION_OF_DNA_METABOLIC_PROCESS	100	0.35158	1.29236	0.0211777	0.20187	0.173395	7581	tags=51%, list=41%, signal=30%	ZSCAN4/DUSP1/GNL3L/RTEL1/SMG6/ACD/DACH1/TFIP11/NMNAT1/RECQL5/HELB/UBQLN4/OGG1/TEN1/KLHL15/MLH1/PARPBP/THOC1/TINF2/MSH3/TERF2/RIF1/MSH2/MEN1/ERCC4/ERCC1/MAGEF1/POT1/TRIP12/TERF2IP/TP53BP1/NAT10/UBR5/RPS3/NUDT16L1/TRIM28/HNRNPA1/CDKN1A/ZNF91/GJA1/ATM/DNAJC2/NBN/SRC/RAD50/SMCHD1/HNRNPU/BCL6/FANCB/HSF1/ZRANB3
GOCC_ACTOMYOSIN	GOCC_ACTOMYOSIN	68	0.374345	1.33374	0.0211777	0.20187	0.173395	7407	tags=51%, list=40%, signal=31%	XIRP2/MYH7/MYH6/ACTA1/MST1R/LDB3/PDLIM2/PRKCZ/FSCN1/FHOD1/LCP1/TEK/ABLIM3/SYNPO/HDAC4/NEBL/MICALL2/PALLD/CNN2/ABLIM1/KAT2B/PDLIM7/MYH9/MYLK/PDLIM1/SORBS1/SYNPO2/CDC42BPA/SIPA1L3/PRICKLE4/MYO18A/PDLIM5/LIMCH1/PGM5/CDC42BPB
GOCC_SNARE_COMPLEX	GOCC_SNARE_COMPLEX	49	0.3965	1.36646	0.0212413	0.202187	0.173668	5771	tags=37%, list=31%, signal=25%	STX1B/GOSR2/STXBP5L/YKT6/GOSR1/STX16/BLOC1S6/BET1L/SNAP23/STX12/VAMP3/SEC22B/VTI1B/SNAP29/BNIP1/TSNARE1/STX17/STX2
GOBP_CLATHRIN_COAT_ASSEMBLY	GOBP_CLATHRIN_COAT_ASSEMBLY	16	0.541006	1.55079	0.0213178	0.202626	0.174044	4550	tags=50%, list=24%, signal=38%	FCHO1/CLTB/AP2B1/CLTC/SGIP1/HIP1R/AP2S1/PIK3C2A
GOBP_T_HELPER_2_CELL_CYTOKINE_PRODUCTION	GOBP_T_HELPER_2_CELL_CYTOKINE_PRODUCTION	11	0.581294	1.53388	0.0214299	0.203401	0.17471	1804	tags=27%, list=10%, signal=25%	IL6/NLRP3/PRKCZ
GOBP_MORPHOGENESIS_OF_A_POLARIZED_EPITHELIUM	GOBP_MORPHOGENESIS_OF_A_POLARIZED_EPITHELIUM	143	0.334177	1.25869	0.0214781	0.203568	0.174854	10481	tags=64%, list=56%, signal=28%	AJAP1/GRHL3/DLG5/WNT9B/LAMA1/GPC6/FOXF2/CELSR1/SPEF1/PRICKLE2/TIAM1/FZD3/PSMB10/PSMC1/AP2A2/INTU/SMURF1/AP2B1/NPHP1/LAMA5/CLTC/RYK/PSMA6/PSME4/PSME2/MLLT3/PRICKLE1/PSMB3/AP2M1/PSME3/FZD4/SEC24B/RPGRIP1L/DVL2/ANKRD6/AP2S1/PSMC6/RAC1/RSPO3/PSMC4/PSMB8/PSMD13/PSMC2/NKD1/PSMD11/LAMA3/PSMD3/PSMB7/PSMA2/RAB10/PSMB1/PSMB2/AHI1/FZD5/PSMB9/PSMD5/PSMC5/PSMD1/IFT20/SMURF2/PSMC3/VANGL1/PSMB6/CELSR2/PSMA7/PTK…
GOBP_REGULATION_OF_ORGANELLE_ASSEMBLY	GOBP_REGULATION_OF_ORGANELLE_ASSEMBLY	180	0.323406	1.23532	0.0217785	0.205949	0.1769	8182	tags=48%, list=44%, signal=27%	CEP295NL/C10orf90/LRRTM1/HAP1/SAXO1/GRID2/BRCA1/TNF/CENPJ/CNOT1/BECN1/PATL2/MTMR3/PLK1/FSCN1/MTM1/ULK1/GAP43/LCP1/MDM1/GPSM2/DCDC2/MARK4/LRFN1/PRKAA2/PHF23/RALB/DYNC1H1/CCDC88A/VPS11/NUMA1/NUP62/SDC1/CHMP5/SDC4/TESK1/KAT2A/YAP1/TPR/SPAG5/RNF5/HSPA1A/CNOT6/TSG101/SEC22B/CNOT6L/KAT2B/G3BP1/CDKL1/MAP4/SH3GLB1/CHMP1B/RAB3GAP2/LRRTM2/NUPR1/SCFD1/NPM1/ATMIN/ATXN2/ALMS1/ARHGAP35/MNS1/PIKFYVE/SDCBP/G3BP2…
GOBP_POSITIVE_REGULATION_OF_CELL_MATRIX_ADHESION	GOBP_POSITIVE_REGULATION_OF_CELL_MATRIX_ADHESION	53	0.394279	1.37303	0.0218002	0.205949	0.1769	9226	tags=58%, list=49%, signal=30%	CEACAM6/EPHA1/PRKCZ/CCL25/TEK/TSC1/PTK2B/CD36/CDK6/SDC4/RAC1/CCL21/NRP1/MAP4K4/JUP/FUT1/CD3E/PPM1F/RIN2/CX3CL1/CSF1/S100A10/RRAS/VEGFA/CIB1/SKAP1/IQGAP1/FERMT1/PTPRJ/EMP2/SFRP1
GOMF_TRANSMITTER_GATED_CHANNEL_ACTIVITY	GOMF_TRANSMITTER_GATED_CHANNEL_ACTIVITY	56	0.394349	1.3823	0.0218221	0.205949	0.1769	2707	tags=30%, list=15%, signal=26%	CHRNB4/HTR3E/GRIN2B/CHRNB2/CHRNA7/GRID2/GRIA1/CHRNA3/GABRA3/GRIN1/CHRNA6/GRIA3/GRIK2/GRIN2D/GABRB2/CHRNA10/PTK2B
GOBP_MEMBRANE_PROTEIN_ECTODOMAIN_PROTEOLYSIS	GOBP_MEMBRANE_PROTEIN_ECTODOMAIN_PROTEOLYSIS	42	0.416738	1.41011	0.0219318	0.206693	0.177538	8686	tags=69%, list=47%, signal=37%	TIMP4/PRKCQ/GPLD1/TNF/SNX33/ADAM9/NRDC/BACE2/NCSTN/ADAM17/MMP7/PSEN1/ADAM10/ERAP1/APH1A/TIMP2/SNX9/MYH9/RBMX/TNFRSF1B/PACSIN3/LRIG2/APOE/ADRA2A/BACE1/SH3D19/SPPL2A/IFNG/SPPL2B
GOBP_ENERGY_DERIVATION_BY_OXIDATION_OF_ORGANIC_COMPOUNDS	GOBP_ENERGY_DERIVATION_BY_OXIDATION_OF_ORGANIC_COMPOUNDS	269	0.307828	1.19441	0.0220788	0.207784	0.178476	10570	tags=64%, list=57%, signal=28%	ADRB3/GYS2/PRKAG3/COX6A2/GPD1/NOS2/PRDM16/SNCA/PPP1R3G/PYGL/PYGM/PASK/ETFB/PHLDA2/NFATC4/RUBCNL/ACO2/TAZ/PHKA2/COQ9/ACADVL/PER2/COQ10A/PANK2/GPD2/PHKG2/PID1/NDUFS6/PCDH12/IDH3G/NDUFS8/ACO1/SLC25A12/UQCC3/GAA/PPP1R2/ETFA/LYRM7/NDUFA10/NDUFA11/UQCRQ/PHKB/NDUFC1/SCO2/SDHAF4/IDH1/AFG1L/MDH1/MDH2/NOA1/AIFM2/NDUFA6/NDUFS3/NDUFB7/PPP1CC/SHMT2/COX7C/NNT/COX6B1/GHITM/NDUFA8/GFPT1/PARK7/VCP/IDH2/ADGRF5/GYS…
GOCC_EXCITATORY_SYNAPSE	GOCC_EXCITATORY_SYNAPSE	44	0.412665	1.40509	0.0221674	0.208324	0.178939	1781	tags=32%, list=10%, signal=29%	LRRTM1/IGSF11/GRID2/SHANK1/CNTN6/GRIA1/GRIN1/GRIA3/DLG4/LRRC4/ELFN1/SYP/PLCB4/CALB2
GOCC_PLATELET_ALPHA_GRANULE_MEMBRANE	GOCC_PLATELET_ALPHA_GRANULE_MEMBRANE	16	0.539032	1.54513	0.0222795	0.208549	0.179133	3983	tags=38%, list=21%, signal=30%	SNCA/ITGA2B/CD109/CD36/APLP2/TMX3
GOBP_IONOTROPIC_GLUTAMATE_RECEPTOR_SIGNALING_PATHWAY	GOBP_IONOTROPIC_GLUTAMATE_RECEPTOR_SIGNALING_PATHWAY	27	0.45185	1.43168	0.0223134	0.208549	0.179133	2707	tags=37%, list=15%, signal=32%	GRIN2B/GRID2/GRIA1/GRIN1/GRIA3/PLP1/GRIK2/TIAM1/GRIN2D/PTK2B
GOBP_MYELOID_LEUKOCYTE_MIGRATION	GOBP_MYELOID_LEUKOCYTE_MIGRATION	210	0.318851	1.22457	0.0223792	0.208549	0.179133	9143	tags=55%, list=49%, signal=28%	CXCR1/S100A14/S100A7/SFTPD/CXCL5/NOD2/UMODL1/DEFB124/CCL23/EPX/S100A9/CXCR2/C5AR2/IL6/IL23A/AZU1/CCR2/EDN2/MMP28/CCL26/CD200R1/DUSP1/CCL8/DPP4/CXCL2/MPP1/CCL22/NBL1/PIK3CD/RIPOR2/KIT/CD99L2/MAPK3/LGMN/RHOH/CCL25/CCL24/JAM3/STAT5B/TIRAP/GBF1/AGER/PTK2B/IL6R/CREB3/CXCL12/PDGFB/IL17RC/P2RY12/CSF1R/RAC2/EMILIN1/SYK/SWAP70/CCL2/PREX1/CXCL3/AKIRIN1/SRP54/TREM2/FCER1G/C3AR1/RAC1/CCL21/C5/CXCL13/PPIB/HRH…
GOBP_POSITIVE_REGULATION_OF_ADAPTIVE_IMMUNE_RESPONSE	GOBP_POSITIVE_REGULATION_OF_ADAPTIVE_IMMUNE_RESPONSE	96	0.355619	1.30284	0.0223792	0.208549	0.179133	6906	tags=44%, list=37%, signal=28%	FCER2/SLC22A13/NOD2/LTA/IL6/IL23A/CCR2/PRKCQ/NLRP3/TFRC/TNF/CD274/AZGP1/PRKCZ/BTK/ADA/KMT5C/EXOSC6/CD226/MLH1/RIF1/CD4/MSH2/PYCARD/HLA-A/NFKBIZ/TP53BP1/MALT1/PLA2G4A/CD1D/IL6ST/EIF2AK4/HLA-E/HLA-DRB1/HLA-F/HPX/HMCES/PTPRC/FZD5/HSPD1/IL18R1/RIPK2
GOBP_RESPONSE_TO_UV	GOBP_RESPONSE_TO_UV	143	0.333296	1.25537	0.0223792	0.208549	0.179133	8912	tags=55%, list=48%, signal=29%	MMP1/SERPINB13/ST20/POLD1/UVSSA/NFATC4/POLH/DDB2/XPC/DTL/CDKN2D/MAP2K7/POLD3/TAF1/MAP3K4/CARD16/RAD18/DDB1/TMEM161A/INO80/RHBDD1/MSH2/NEDD4/UBE2A/MEN1/SMPD1/RUVBL2/MME/ERCC4/CDC25A/GPX1/ERCC1/SDF4/EGFR/EP300/ERCC2/AURKB/YY1/SDE2/MAPK13/USF1/USP47/EIF2AK4/CHEK1/PRKCD/NPM1/CREBBP/REV1/PML/MC1R/PPID/RPL26/MMP2/CDKN1A/UBE2B/RHNO1/IVL/RELA/TP53I13/MAP4K3/METTL3/GTF2H2/SPRTN/FEN1/ZRANB3/BCL3/IMPACT/TRI…
GOCC_SECRETORY_GRANULE_MEMBRANE	GOCC_SECRETORY_GRANULE_MEMBRANE	291	0.307672	1.19696	0.0223792	0.208549	0.179133	9581	tags=57%, list=51%, signal=28%	CHRNB4/ABCA13/FCGR3B/CXCR1/CEACAM3/DBH/CEACAM6/RAB44/SYT2/SNCA/CXCR2/TEKT3/PIGR/AZU1/ATP8B3/P2RX1/SIRPB1/SPACA6/ITGA2B/CADPS/MANBA/TCIRG1/HVCN1/CD109/RAB5C/ITGAL/SLC2A3/SLC27A2/SLC30A5/ANPEP/NBEAL2/CD33/RAB27B/AP1M1/AP2A2/PCSK4/NRAS/HLA-C/CD36/TLR2/CD14/NCSTN/KCNAB2/DSP/TMED10/VPS13C/APLP2/TMEM190/PSEN1/ATP6V1D/ITGAX/GAA/CLEC12A/TMEM179B/ATP6V0A1/PGRMC1/SNAP23/SLC17A9/RAB24/CD46/TMX3/DEGS1/MME/AD…
GOBP_POSITIVE_REGULATION_OF_PEPTIDE_SECRETION	GOBP_POSITIVE_REGULATION_OF_PEPTIDE_SECRETION	148	0.331984	1.25405	0.0226796	0.210466	0.180779	7239	tags=50%, list=39%, signal=31%	NPY2R/IL1A/NR0B2/DRD2/RASL10B/ACHE/OR51E2/GPLD1/TGFB3/NMU/TTN/MYOM1/C1QTNF3/CFTR/ADORA2A/HFE/GPR68/TM7SF3/ADAM9/CD33/ANO1/CAMK2N1/NLGN2/APBB1/OXCT1/TLR2/TMED10/PLA2G6/NR1H2/IL13/CD2AP/PPP3CB/PDX1/EGFR/PPARD/TREM2/ITSN1/AIMP1/TARDBP/RAC1/PHPT1/GPR27/MCU/VEGFC/TRPM4/JAK2/MPC2/HLA-DRB1/DNM1L/PLA2G1B/TGFB2/ILDR1/KCNN4/GPER1/IRS2/PPID/GOLPH3/TCF7L2/MYRIP/GLUD1/EXOC1/GJA1/GRP/GOLPH3L/CAPN10/IGF1/DYNLL1…
GOBP_REGULATION_OF_PROTEIN_LOCALIZATION_TO_NUCLEUS	GOBP_REGULATION_OF_PROTEIN_LOCALIZATION_TO_NUCLEUS	127	0.339909	1.26874	0.0226796	0.210466	0.180779	10783	tags=73%, list=58%, signal=31%	CHP2/TRIM29/TFRC/SHH/CARD10/PLK1/PIN1/CABP1/MEPCE/SUFU/HDAC3/CD36/ECT2/LZTS2/PARP9/OTUD7B/TMEM98/NUTF2/PSEN1/RBM22/NUP62/CTNNA1/TESK1/RASSF5/NF2/FYN/BYSL/YAP1/DCLK1/RAN/CD2AP/TPR/CHP1/HSP90AB1/TARDBP/DMAP1/PARK7/MDFIC/UBR5/CCT5/NOLC1/JAK2/JUP/PRKCD/LATS2/MAPK14/GLUL/TRIM28/UFM1/KAT7/MFHAS1/PKIA/LAMTOR5/EFCAB7/TCP1/ORMDL3/SESN2/SRC/SUMO4/BMP4/CCT8/CCT4/GLI3/IPO5/EIF2AK3/LARP7/NMD3/SMO/SIN3A/PIK3R2…
GOMF_LIGAND_GATED_ION_CHANNEL_ACTIVITY	GOMF_LIGAND_GATED_ION_CHANNEL_ACTIVITY	132	0.337839	1.2658	0.0226796	0.210466	0.180779	1979	tags=25%, list=11%, signal=23%	CHRNB4/HTR3E/GRIN2B/CHRNB2/CHRNA7/GRID2/TRPV1/GRIA1/CHRNA3/KCNJ15/KCNJ12/GABRA3/KCNE2/GRIN1/P2RX1/ASIC4/CHRNA6/KCNH2/GABRD/RYR3/ABCC8/GRIA3/ZACN/ASIC3/GRIK2/ASIC1/CFTR/KCNJ10/KCNK6/KCNJ5/MCOLN3/SHROOM2/GRIN2D
GOMF_DEMETHYLASE_ACTIVITY	GOMF_DEMETHYLASE_ACTIVITY	39	0.426013	1.4302	0.0228623	0.211759	0.181889	8600	tags=62%, list=46%, signal=33%	KDM4E/CYP1A1/CYP51A1/FTO/KDM5A/KDM5B/KDM4A/RIOX1/KDM5D/KDM1B/UTY/HR/JARID2/PHF8/ALKBH2/KDM7A/ALKBH3/RIOX2/CYP1A2/KDM6B/KDM5C/KDM6A/KDM4C/KDM3B
GOBP_CEREBRAL_CORTEX_GABAERGIC_INTERNEURON_DIFFERENTIATION	GOBP_CEREBRAL_CORTEX_GABAERGIC_INTERNEURON_DIFFERENTIATION	10	0.589218	1.52674	0.0228825	0.211759	0.181889	1034	tags=50%, list=6%, signal=47%	FEZF2/DRD1/DRD2/ASCL1/ARX
GOBP_ACTIVATION_OF_INNATE_IMMUNE_RESPONSE	GOBP_ACTIVATION_OF_INNATE_IMMUNE_RESPONSE	140	0.333587	1.25547	0.02298	0.212072	0.182158	8971	tags=61%, list=48%, signal=32%	MUC5B/MUC5AC/MUC4/MUC12/MUC3A/MUCL1/MUC1/MNDA/PAK1/ZBP1/CLEC10A/PSMB10/PSMC1/NRAS/HEXIM1/PLCG2/ICAM2/PSMA6/PSME4/FYN/PSME2/TAB3/PSPC1/SYK/PSMB3/TAB1/PSME3/SKP1/EP300/PYCARD/XRCC6/PSMC6/FCER1G/MALT1/TOMM70/PSMC4/PSMB8/PSMD13/PSMC2/PRKCD/CREBBP/PSMD11/PSMD3/MUC6/PSMB7/FFAR2/RPS6KA5/PSMA2/KRAS/PSMB1/PSMB2/LYN/RELA/RELB/PSMB9/PRKACB/CUL1/PAK2/PSMD5/SRC/PSMC5/PSMD1/RBM14/PRKDC/MATR3/PSMC3/FBXW11/PSMB6…
GOBP_RESPONSE_TO_PEPTIDE	GOBP_RESPONSE_TO_PEPTIDE	483	0.290772	1.15116	0.02298	0.212072	0.182158	9131	tags=53%, list=49%, signal=28%	PKLR/TH/AGRP/SLC30A10/MMP13/AANAT/CRHBP/CHRNA7/GNRHR/CRHR2/NOD2/TIMP4/FFAR3/ADCY7/MMP12/FOXC2/ATP6V0A4/PHEX/PRKCQ/GPLD1/TNFSF10/LPL/PRKAR1B/IRF5/MZB1/GAL/TCIRG1/DDX11/INSIG1/GGH/CACNB1/PAK1/LPIN3/CPEB1/ADRB2/ACVR1C/INSIG2/STAT2/PRKCZ/SRD5A1/TBC1D4/LGMN/BMP7/BAIAP2/EPHA4/ABCC2/STAT5A/BTG2/TEK/ZFP36L1/ANO1/STAT5B/ADCY4/TSC1/PPARA/GRB10/CDK4/SH2B2/LRP6/TNS2/WDTC1/AGER/TSC2/PID1/CD36/ID1/ZBTB7B/TLR2/…
GOBP_POSITIVE_REGULATION_OF_SYNAPTIC_TRANSMISSION_GLUTAMATERGIC	GOBP_POSITIVE_REGULATION_OF_SYNAPTIC_TRANSMISSION_GLUTAMATERGIC	27	0.451085	1.42926	0.0232367	0.213874	0.183706	4741	tags=44%, list=25%, signal=33%	CACNG8/DRD1/SHANK1/CCR2/ADORA2A/TSHZ3/NLGN2/PTK2B/SHANK2/CCL2/EGFR/NRXN1
GOBP_SISTER_CHROMATID_SEGREGATION	GOBP_SISTER_CHROMATID_SEGREGATION	186	0.322296	1.232	0.0232804	0.213874	0.183706	8401	tags=52%, list=45%, signal=29%	TEX14/AXIN2/DUSP1/USP44/DDX11/TTN/BECN1/PLK1/CDT1/CDCA5/REC8/CENPC/CHMP7/NCAPH/MAU2/HECW2/DIS3L2/ANAPC1/ZWINT/SMC2/NAA10/CDC26/AURKC/NEK2/TACC3/NUMA1/NUP62/CHMP5/INO80/RIOK2/ANAPC11/STAG1/LCMT1/NIPBL/VPS4A/RAN/NCAPH2/TPR/IK/PRC1/SPAG5/CDC6/NCAPD2/PIBF1/AURKB/SMC3/SMC5/EML4/PSMG2/DSN1/CHMP1B/CENPF/KPNB1/KIF22/HDAC8/CDCA8/SGO1/MAD1L1/CDC23/CUL3/SEH1L/PDS5A/HORMAD1/KIFC1/ANAPC15/POGZ/NAA50/KIF14/RB1…
GOBP_COLLAGEN_CATABOLIC_PROCESS	GOBP_COLLAGEN_CATABOLIC_PROCESS	47	0.40666	1.40027	0.0233037	0.213874	0.183706	7845	tags=49%, list=42%, signal=28%	PRSS2/MMP20/MMP13/COL19A1/MMP26/MMP1/TMPRSS6/MMP12/MMP28/MMP17/MMP23B/VSIR/MMP10/MMP7/MMP19/COL15A1/CTSL/FAP/MMP2/COL13A1/ADAMTS2/MRC2/MMP21
GOBP_REGULATION_OF_HISTONE_METHYLATION	GOBP_REGULATION_OF_HISTONE_METHYLATION	57	0.387843	1.36314	0.0233037	0.213874	0.183706	8593	tags=63%, list=46%, signal=34%	PAX5/BRCA1/MYB/PHF19/AASS/ZNF304/WDR61/IWS1/AUTS2/RIF1/MTHFR/SETD7/SMARCB1/BCOR/PYGO2/OGT/PAF1/KMT2E/ZNF335/JARID2/MTF2/CHTOP/DNMT3B/WDR5/DNMT1/NELFE/SMAD4/ZNF274/BRD4/CTR9/SNW1/PAXIP1/RNF20/TET1/PHF1/KMT2A
GOBP_NEGATIVE_REGULATION_OF_TOLL_LIKE_RECEPTOR_SIGNALING_PATHWAY	GOBP_NEGATIVE_REGULATION_OF_TOLL_LIKE_RECEPTOR_SIGNALING_PATHWAY	38	0.421731	1.41049	0.0235153	0.214839	0.184535	9033	tags=61%, list=48%, signal=31%	BPIFB1/NLRP2B/NOD2/TLR3/CD14/IRAK3/SMPDL3B/CACTIN/LY96/OTUD4/LGR4/MFHAS1/LYN/GRAMD4/TICAM1/F2RL1/LRRC14/NR1D1/TLR4/TLR6/NFKBIL1/RAB7B/IRF4
GOMF_PROTEIN_SERINE_THREONINE_PHOSPHATASE_INHIBITOR_ACTIVITY	GOMF_PROTEIN_SERINE_THREONINE_PHOSPHATASE_INHIBITOR_ACTIVITY	10	0.588771	1.52558	0.0235605	0.214839	0.184535	5835	tags=70%, list=31%, signal=48%	PPP1R2/PPP1R14A/PPP1R14D/FAM122A/PPP1R11/PPP1R14B/PPP1R8
GOBP_CELLULAR_RESPONSE_TO_PEPTIDE	GOBP_CELLULAR_RESPONSE_TO_PEPTIDE	363	0.299343	1.17472	0.0235808	0.214839	0.184535	9131	tags=54%, list=49%, signal=28%	PKLR/SLC30A10/CRHBP/GNRHR/CRHR2/NOD2/FFAR3/ADCY7/FOXC2/ATP6V0A4/PRKCQ/GPLD1/LPL/PRKAR1B/MZB1/TCIRG1/DDX11/INSIG1/CACNB1/PAK1/LPIN3/CPEB1/ADRB2/INSIG2/PRKCZ/SRD5A1/TBC1D4/LGMN/BAIAP2/EPHA4/STAT5A/ZFP36L1/ANO1/STAT5B/ADCY4/TSC1/GRB10/CDK4/SH2B2/TNS2/WDTC1/AGER/TSC2/PID1/CD36/ID1/ZBTB7B/CDK5/UCP2/BAIAP2L1/FER/SNX5/BRIP1/PSEN1/ATP6V1D/SHC1/CHMP5/PIK3R3/PTPRA/HDAC5/SRSF5/FYN/MYO1C/ATP6V0E2/ATP6V0A1/AT…
GOBP_NEGATIVE_REGULATION_OF_RESPONSE_TO_EXTERNAL_STIMULUS	GOBP_NEGATIVE_REGULATION_OF_RESPONSE_TO_EXTERNAL_STIMULUS	341	0.301497	1.18026	0.0235808	0.214839	0.184535	8649	tags=48%, list=46%, signal=26%	CLDN19/CARTPT/GRID2/SPX/MMP26/NOD2/DRD1/RTN4RL1/DRD2/KLRC1/MMP12/C5AR2/NLRP12/AJAP1/MMP28/CD200R1/ADTRP/NLRP3/DHX58/PLXNA3/TSPAN8/DUSP1/FEM1A/BBS2/TNF/DPP4/PADI2/NBL1/LILRB1/CD109/NMI/C1QTNF3/NLRC3/MICB/SEMA4F/ADORA2A/SLC12A2/EPHA4/AOAH/TARBP2/ADA/SH2B3/SEMA3B/PLAT/SEMA3F/TEK/NLRX1/GPATCH3/PPARA/LGALS9/C1QTNF1/TRIM21/NOS3/SERPINE2/SEMA4B/CHD8/SIRT2/MAPK7/PDGFB/SEMA4D/CLASP2/IRAK3/PTGIS/DUSP3/SMPD…
GOCC_CENTRIOLAR_SATELLITE	GOCC_CENTRIOLAR_SATELLITE	105	0.351504	1.29405	0.0235808	0.214839	0.184535	9616	tags=61%, list=52%, signal=30%	DBH/CLECL1/PRKCQ/CCDC13/IL17RB/CEP131/MPP1/NLRC3/PLK1/CDC42BPG/CEP68/PDZD2/CYTH4/CEP72/TEK/RAB11FIP5/IL4R/CCDC113/FLII/CHD3/DCDC2/PODXL/TACC3/PLA2G6/C2CD3/ZNF365/CD2AP/BBS5/SPAG5/KIAA0753/ITGB1BP1/PIBF1/NUDT21/G6PD/CENPU/CEP55/LATS2/MIEN1/CCDC66/UBN1/TMEM63A/CCDC14/WDR13/HAUS6/AK5/RAD23A/KRT18/KNSTRN/FNIP2/TAP1/CCDC61/SSX2IP/EXOC7/BBS9/DLST/PCNT/CEP290/HOOK3/DYSF/PCM1/IFT43/RAB11FIP3/KCTD1/PARD6A
GOBP_PROTEIN_LOCALIZATION_TO_CYTOSKELETON	GOBP_PROTEIN_LOCALIZATION_TO_CYTOSKELETON	58	0.38439	1.3525	0.0236044	0.214839	0.184535	10330	tags=74%, list=55%, signal=33%	CEP131/MAP1A/CEP72/CEP192/MARK4/MID2/C2CD3/NUMA1/NUP62/GAS2L1/SPAG5/NEDD1/KIAA0753/KLHL21/CEP350/PIBF1/AURKA/GAS2L2/CCDC14/WRAP73/MAPRE2/TTK/KIF20B/HNRNPU/CRIPT/STIL/APC/CEP250/BICD1/DIAPH1/HOOK3/GOLGB1/MCPH1/MAPRE3/NSFL1C/PCM1/PARD6A/PPP1R9B/DVL1/UBXN2B/ABHD17B/FAM83H/ABHD17A
GOBP_ATTACHMENT_OF_SPINDLE_MICROTUBULES_TO_KINETOCHORE	GOBP_ATTACHMENT_OF_SPINDLE_MICROTUBULES_TO_KINETOCHORE	33	0.432798	1.42027	0.0236346	0.214839	0.184535	9277	tags=76%, list=50%, signal=38%	TEX14/BECN1/CDT1/CENPC/SIRT2/ECT2/AURKC/NEK2/SPAG5/AURKB/EML4/SGO1/MAD1L1/SEH1L/RCC2/RB1/HNRNPU/KNSTRN/BUB3/BOD1/APC/RMDN1/MIS12/CENPE/CDC42
GOBP_POSITIVE_REGULATION_OF_PROTEIN_TARGETING_TO_MEMBRANE	GOBP_POSITIVE_REGULATION_OF_PROTEIN_TARGETING_TO_MEMBRANE	30	0.444216	1.4353	0.0237793	0.21586	0.185412	4721	tags=43%, list=25%, signal=32%	PDZK1/SLC51B/PAK1/ERBB2/CDK5/FIS1/MIEF2/FYN/MYO1C/CHP1/ITGB1BP1/TCAF1/STOM
GOBP_REGULATION_OF_DNA_TEMPLATED_TRANSCRIPTION_IN_RESPONSE_TO_STRESS	GOBP_REGULATION_OF_DNA_TEMPLATED_TRANSCRIPTION_IN_RESPONSE_TO_STRESS	114	0.343632	1.27252	0.0238812	0.215903	0.185449	10420	tags=69%, list=56%, signal=31%	MUC1/EPO/PSMB10/PSMC1/SIRT2/DNAJB1/MAPK7/RGS14/PSMA6/INO80/PSME4/PSME2/ARNT/PSMB3/NEDD4/PSME3/HSPA1A/EP300/PSMC6/RPS6KA1/PSMC4/PSMB8/PSMD13/UBA52/PSMC2/BCLAF1/CHEK1/NCK2/CREBBP/PSMD11/PSMD3/PSMB7/PSMA2/NFE2L2/PSMB1/PSMB2/RELA/ANKRD2/ELOC/PSMB9/SESN2/PSMD5/PSMC5/PSMD1/HIGD1A/PSMC3/TMBIM6/HSF1/NCK1/PSMB6/MBTPS2/IMPACT/PSMA7/VEGFA/SIN3A/CITED2/ELOB/DDIT3/RPS6KA3/VHL/STOX1/BACH1/UBB/EGLN2/PSMD14/CREB…
GOCC_CATALYTIC_STEP_2_SPLICEOSOME	GOCC_CATALYTIC_STEP_2_SPLICEOSOME	84	0.362026	1.31326	0.0238812	0.215903	0.185449	9501	tags=62%, list=51%, signal=30%	DHX38/TFIP11/SRRM2/PPIL1/SART1/SYF2/PRPF6/RBM22/SF3A3/PRPF19/PRPF4B/PNN/ISY1/CACTIN/HNRNPR/RBMX/PRPF8/CWC22/RALY/SF3B1/PPIE/HNRNPF/SNRPF/RBM8A/LSM3/HNRNPA3/HNRNPA1/SNRPG/SNRPA1/SNRPB/FRG1/HNRNPM/SNRPB2/PABPC1/GPATCH1/LSM2/DDX23/HNRNPU/SNW1/SNRNP200/PPIL3/CWC27/SNRPN/SLU7/HNRNPH1/MAGOHB/SF3A1/LSM7/BUD31/SNRPD3/SNRNP40/CDC40
GOCC_PML_BODY	GOCC_PML_BODY	101	0.353755	1.30073	0.0238812	0.215903	0.185449	8592	tags=56%, list=46%, signal=31%	RDM1/MLIP/TENM2/KLHL20/SP100/TP53INP2/KAT6A/SATB1/SENP2/CHD3/ELF4/MAPK7/RGS14/ZBED1/ZMYM2/RNF6/HIPK2/TRIM27/TOP3A/SMC5/NR2C1/ISG20/PIAS1/PARK7/THAP1/HIPK3/CASP8AP2/SUMO2/USP7/PML/PIAS4/TCF7L2/ZBTB16/UBN1/RB1/CALCOCO2/TRIM16/SP3/ANKRD2/NBN/NSMCE2/IKBKE/DAXX/TOPORS/CHEK2/CIART/HSF1/HMBOX1/AKAP8L/PATL1/RPA1/TP53INP1/DAPK3/N4BP1/SUMO3/ATR/MORC3
GOCC_CYTOSOLIC_SMALL_RIBOSOMAL_SUBUNIT	GOCC_CYTOSOLIC_SMALL_RIBOSOMAL_SUBUNIT	45	0.408899	1.39577	0.023977	0.216475	0.18594	6787	tags=60%, list=36%, signal=38%	HBA2/HBA1/LARP4/RPS10/MCTS1/DDX3X/RPS12/EIF2D/RPS27/UBA52/RPS9/RPS28/RPS23/RPS19/RPS3/RPS15A/RPS8/RPS24/RPS18/RPS4Y1/RPS25/RPS6/RPS15/RPSA/RPS20/RPS11/RPS16
GOBP_REGULATION_OF_B_CELL_ACTIVATION	GOBP_REGULATION_OF_B_CELL_ACTIVATION	115	0.34894	1.29338	0.0241816	0.21795	0.187207	9402	tags=57%, list=50%, signal=29%	CHRNB2/TNFRSF13C/NOD2/CD19/IL6/TFRC/MZB1/MNDA/SLC39A10/BTK/CTLA4/ADA/KMT5C/ZFP36L1/STAT5B/TIRAP/EXOSC6/MLH1/TNFRSF4/INPP5D/PPP2R3C/THOC1/RIF1/IL13/SYK/MSH2/HMGB3/TP53BP1/SH3KBP1/FCGR2B/NFATC2/RC3H1/CD74/PTPN6/PAWR/CR1/HMCES/GPR183/IRS2/CDKN1A/IL7/PTPRC/LAPTM5/LYN/ATM/TICAM1/MIF/INHBA/BCL6/IL5/PELI1/TNIP2/EXOSC3/TLR4/PAXIP1/CD27/TYROBP/BAD/WNT3A/NCKAP1L/TNFSF13B/IGLL5/CARD11/SFRP1/SASH3/MEF2C
GOCC_VESICLE_COAT	GOCC_VESICLE_COAT	53	0.391848	1.36457	0.0242057	0.21795	0.187207	9392	tags=66%, list=50%, signal=33%	ENTHD1/SYNRG/AP1G2/SEC23B/AP2A2/AP1S1/EPN1/COPZ2/CLTB/AP2B1/CLTC/AP2M1/PEF1/SEC24B/SGIP1/AP2S1/ARCN1/PDCD6/COPZ1/COPB2/SEC23A/COPG1/TBC1D5/SEC24D/NCALD/SAR1A/COPB1/BTBD8/SCYL1/SEC24A/SEC31A/AFTPH/COPE/SAR1B/AP2A1
GOBP_HISTONE_H4_DEACETYLATION	GOBP_HISTONE_H4_DEACETYLATION	11	0.577044	1.52267	0.0244672	0.218752	0.187896	6545	tags=82%, list=35%, signal=53%	SIRT7/HDAC3/REST/SIRT2/HDAC4/HDAC2/HDAC8/HDAC1/HDAC9
GOBP_NEGATIVE_REGULATION_OF_MICROTUBULE_POLYMERIZATION_OR_DEPOLYMERIZATION	GOBP_NEGATIVE_REGULATION_OF_MICROTUBULE_POLYMERIZATION_OR_DEPOLYMERIZATION	35	0.42523	1.40691	0.024475	0.218752	0.187896	8708	tags=66%, list=47%, signal=35%	TUBB4A/TRIM54/SNCA/APC2/SPEF1/INPP5J/CLASP2/MID1IP1/CDH5/MAP1B/EML2/DYRK1A/STMN1/MAP2/HDAC6/APC/FGF13/CLASP1/CIB1/STMN2/ARHGEF2/FKBP4/CAMSAP1
GOBP_REGULATION_OF_PATTERN_RECOGNITION_RECEPTOR_SIGNALING_PATHWAY	GOBP_REGULATION_OF_PATTERN_RECOGNITION_RECEPTOR_SIGNALING_PATHWAY	95	0.352774	1.29251	0.0244819	0.218752	0.187896	9449	tags=57%, list=51%, signal=28%	BPIFB1/NLRP2B/NOD2/SLC15A2/DHX58/IFI35/TLR3/NLRX1/ESR1/TIRAP/GPATCH3/TLR5/CD36/TLR2/CD14/ERBIN/IRAK3/SMPDL3B/HSPA1A/DDX3X/IRF1/CACTIN/LY96/IRF7/LBP/RIOK3/PUM2/OTUD4/LGR4/ANKRD17/MFHAS1/LYN/PJA2/GRAMD4/TICAM1/F2RL1/LRRC14/PELI1/DDX60/NR1D1/APPL1/TLR4/PTPN22/CAV1/TLR6/NFKBIL1/HSPA1B/RAB7B/TLR1/IRF4/TSPAN6/CYBA/SLC15A3/APPL2
GOBP_REGULATION_OF_LYMPHOCYTE_MIGRATION	GOBP_REGULATION_OF_LYMPHOCYTE_MIGRATION	63	0.376068	1.3345	0.0247823	0.218752	0.187896	7582	tags=59%, list=41%, signal=35%	AIRE/C10orf99/S100A7/GCSAML/CCR2/CD200R1/ADTRP/PADI2/RIPOR2/CD99L2/PTK2B/ADAM17/CXCL12/LRCH1/OXSR1/CRKL/TNFRSF14/WNK1/ECM1/CCL2/ADAM10/STK10/PYCARD/RIPK3/CCL21/CXCL13/SELENOK/CCL20/CCL4/DOCK8/STK39/CXCL10/CRK/CXCL14/JAM2/XCL2/APP
GOMF_BETA_CATENIN_BINDING	GOMF_BETA_CATENIN_BINDING	85	0.36337	1.31934	0.0247823	0.218752	0.187896	8915	tags=64%, list=48%, signal=33%	AMER3/SALL1/PTPRU/AJAP1/DLG5/AMER2/AXIN2/APC2/SHROOM2/PIN1/CALCOCO1/ESR1/SUFU/CDH2/CHD8/CARM1/PSEN1/CTNNA1/BCL9/NUMB/TBL1X/CD2AP/CDH5/RUVBL2/SKP1/EP300/CTNND2/AXIN1/SOX9/FOXO4/CDH26/TCF7L2/MED12L/SLC9A3R2/GJA1/SETD1A/PRKN/TCF4/CBY1/ASH2L/HDAC6/GLI3/CTNNA2/RORA/KANK1/KDM6B/APC/DACT2/TCF7L1/DVL3/TRPC4/GRIP1/CDHR5/PTPRJ
GOBP_NEGATIVE_REGULATION_OF_TELOMERE_MAINTENANCE	GOBP_NEGATIVE_REGULATION_OF_TELOMERE_MAINTENANCE	34	0.432429	1.42367	0.0248796	0.218752	0.187896	7073	tags=53%, list=38%, signal=33%	GNL3L/RTEL1/SMG6/ACD/TEN1/TINF2/TERF2/ERCC4/ERCC1/POT1/TERF2IP/NAT10/HNRNPA1/ATM/NBN/SRC/RAD50/HNRNPU
GOBP_POSITIVE_REGULATION_OF_IMMUNOGLOBULIN_PRODUCTION	GOBP_POSITIVE_REGULATION_OF_IMMUNOGLOBULIN_PRODUCTION	40	0.415698	1.40095	0.0249569	0.218752	0.187896	7905	tags=50%, list=42%, signal=29%	IL6/TFRC/MZB1/KMT5C/EXOSC6/IL4R/MLH1/TNFRSF4/RIF1/IL13/MSH2/TP53BP1/GPI/HLA-E/HPX/HMCES/PTPRC/IL5/EXOSC3/PAXIP1
GOBP_NUCLEAR_TRANSCRIBED_MRNA_CATABOLIC_PROCESS	GOBP_NUCLEAR_TRANSCRIBED_MRNA_CATABOLIC_PROCESS	202	0.31594	1.21249	0.024975	0.218752	0.187896	11129	tags=70%, list=60%, signal=28%	EDC4/CNOT1/PATL2/SMG6/PELO/TNKS1BP1/NANOS1/SMG8/BTG2/ZFP36L1/CPEB3/WDR61/EXOSC6/RPL21/DCP1B/MLH1/DIS3L2/DCP1A/TNRC6B/TNRC6A/AGO1/UPF1/THRAP3/DCPS/PPP2R2A/RPS10/RC3H2/RNPS1/SMG7/SAMD4B/CNOT6/CNOT6L/RPS12/CNOT4/LSM4/PARN/EDC3/RPL3/DXO/RPS27/UPF2/EIF4G1/PNRC2/RC3H1/UBA52/RPS9/RPS28/RPL23A/RPL31/NCBP1/NT5C3B/RPS23/RPS19/PDE12/RPL37A/RPS3/LSM5/RBM8A/LSM3/RPS15A/RPL18/RPL11/SECISBP2/RPL28/RPL5/RPL32/RP…
GOBP_POSITIVE_REGULATION_OF_MAPK_CASCADE	GOBP_POSITIVE_REGULATION_OF_MAPK_CASCADE	494	0.29017	1.14994	0.024975	0.218752	0.187896	9148	tags=52%, list=49%, signal=27%	ADRB3/SLC30A10/GRM4/ERN2/S100A7/NRG1/CHRNA7/DRD4/GPR55/NOD2/CCL23/GNG3/DRD2/FGF9/TDGF1/EDA2R/MST1R/C5AR2/GPR37L1/IL6/ABCA7/ADRA2B/CCL26/AVPI1/NTRK3/RELL1/TGFB3/RELL2/CCL8/TNF/SPHK1/KSR1/ALKAL2/TBX1/RASGRP1/CCL22/NDRG4/PAK1/KIT/ERBB2/XDH/GCNT2/ADRB2/LILRA5/MAPK10/TIAM1/PRKCZ/TGFA/MAPK3/AJUBA/NMNAT1/CLEC7A/FGD2/CCL25/CCL24/EPHA4/TLR3/EPO/MAP3K3/TEK/UBE2V1/MAP2K7/TIRAP/MINK1/LGALS9/C1QTNF1/AGER/CDH2…
GOBP_PROTEIN_TARGETING_TO_MEMBRANE	GOBP_PROTEIN_TARGETING_TO_MEMBRANE	196	0.316735	1.21419	0.024975	0.218752	0.187896	10738	tags=67%, list=58%, signal=29%	PDZK1/SLC51B/AQP11/ZDHHC15/RTP4/PAK1/ERBB2/CHM/ZDHHC24/TRAM2/SEC61A2/EXOC4/RPL21/CDK5/SEC61G/ZDHHC23/FIS1/GDI1/MIEF2/SIL1/TRAM1L1/FYN/MYO1C/GOLGA7/RPS10/SEC61A1/ARL6/CHP1/ITGB1BP1/ZDHHC22/ZDHHC6/SRP54/ZDHHC21/VPS37B/PEX19/TCAF1/RPS12/STOM/RPL3/RPS27/PRKCI/UBA52/RPS9/RPS28/SEC61B/RPL23A/PEX5/RPL31/RPS23/RPS19/RPL37A/RPS3/RPS15A/RPL18/RPL11/PEX16/RPL28/RPL5/RPL32/SGTB/RPS8/ZDHHC4/RPS24/PIKFYVE/RPS1…
GOBP_REACTIVE_OXYGEN_SPECIES_METABOLIC_PROCESS	GOBP_REACTIVE_OXYGEN_SPECIES_METABOLIC_PROCESS	248	0.308844	1.195	0.024975	0.218752	0.187896	10633	tags=65%, list=57%, signal=28%	MPO/DUOXA2/SLC30A10/HBQ1/NOS1/PON3/CYP1A1/SFTPD/DUOX2/NOS2/EPX/SNCA/GRIN1/GCHFR/DUOX1/HBB/BRCA1/TNF/PAGE4/HVCN1/BECN1/XDH/HBA2/HBA1/CLEC7A/CYP1B1/BMP7/MPV17L/NCF2/PPARA/GBF1/DDIT4/NOS3/PID1/PTK2B/CD36/SH3PXD2A/SESN1/FANCC/TLR2/SIRT2/PDGFB/PTGIS/NQO2/HDAC4/PXDN/FYN/RAC2/SYK/TUSC2/RNF41/MAPT/GNAI3/GPX1/ADGRB1/PREX1/DDAH2/HSP90AB1/EGFR/NDUFS3/PRCP/RIPK3/VDAC1/EIF6/NNT/RAC1/SOD2/PRDX1/PARK7/G6PD/GRB2…
GOBP_REGULATION_OF_MICROTUBULE_CYTOSKELETON_ORGANIZATION	GOBP_REGULATION_OF_MICROTUBULE_CYTOSKELETON_ORGANIZATION	135	0.334774	1.25592	0.024975	0.218752	0.187896	10873	tags=67%, list=58%, signal=28%	TUBB4A/TRIM54/SNCA/TRPV4/FSD1/APC2/PAK1/PLK1/SPEF1/INPP5J/MAP1A/PKD1/DCTN1/RASSF1/GPSM2/PRKAA2/DYNC1H1/CLASP2/TACC3/NUMA1/NUP62/CHMP5/CLTC/MID1IP1/ARL2/CDK2AP2/TPR/CDH5/MAP1B/GAS2L1/SPAG5/MAPT/HSPA1A/GBA2/EML2/DYRK1A/RAC1/CHMP1B/SKA2/STMN1/RPS3/TPPP/MAP9/MAP2/GAS2L2/TOGARAM1/TRIM36/CCSAP/MAP6/MAPRE2/STMN3/HNRNPU/HDAC6/SKA3/SKA1/APC/FGF13/CEP70/CLASP1/CKAP5/RAE1/SENP6/CIB1/DIXDC1/OCLN/STMN2/WNT3A/…
GOBP_REGULATION_OF_POSTSYNAPTIC_MEMBRANE_POTENTIAL	GOBP_REGULATION_OF_POSTSYNAPTIC_MEMBRANE_POTENTIAL	128	0.337064	1.25922	0.024975	0.218752	0.187896	3303	tags=31%, list=18%, signal=26%	CHRNB4/NPY2R/GRIN2B/CHRNB2/IGSF11/CHRNA7/NPAS4/GRID2/DRD4/TRPV1/SHANK1/STX1B/GRIA1/CHRNA3/DRD2/GABRA3/TMEM108/GRIN1/P2RX1/CHRNA6/MPP2/GRIA3/DLG4/GABBR1/GRIK2/ADRB2/CELF4/PRKCZ/ADORA2A/GRIN2D/DMPK/GABRB2/NLGN2/CHRNA10/PTK2B/CDK5/SHANK2/MTMR2/SSH1/S1PR2
GOBP_RESPONSE_TO_VIRUS	GOBP_RESPONSE_TO_VIRUS	327	0.297306	1.16212	0.024975	0.218752	0.187896	9401	tags=57%, list=50%, signal=29%	CHRM2/CYP1A1/VWCE/DUOX2/PLA2G10/AGBL4/MST1R/MMP12/IL6/IL23A/SLFN13/AZU1/CD207/IFNLR1/APOB/TRIM34/TRIM6/DHX58/CCL8/TLR7/IRGM/IRF5/TNF/ITGB8/MX2/OAS1/RTP4/BECN1/CCL22/LILRB1/NMI/IRF9/ZBP1/GPAM/MICB/IFIT1/STAT2/IFI44/IRF3/GBP3/APOBEC3C/TLR3/TARBP2/RNASEL/NLRX1/AP1S1/TRIM22/GPATCH3/LGALS9/IFI44L/POLR3B/GBF1/RNF216/DDIT4/AKAP1/UNC93B1/POLR3F/IFIT5/CXCL12/ZC3HAV1/PARP9/CDK6/IRAK3/IFIT2/GTF2F1/ELMOD2/IL…
GOCC_CYTOPLASMIC_STRESS_GRANULE	GOCC_CYTOPLASMIC_STRESS_GRANULE	73	0.364157	1.30354	0.024975	0.218752	0.187896	9370	tags=64%, list=50%, signal=32%	RBFOX1/DDX25/PABPC5/PRKAA2/LARP4/GIGYF2/ENDOV/RC3H2/RBPMS/LARP1/DDX3X/DYRK3/GRB7/PABPC4L/TARDBP/G3BP1/TIA1/UBAP2L/VCP/EIF4G1/NXF1/KPNB1/RC3H1/YBX1/TIAL1/ATXN2/PUM2/CASC3/G3BP2/CELF1/MCRIP2/CTSG/DDX19A/PABPC1/PABPC3/DDX6/RBM4/LSM14A/STAU1/PQBP1/PABPC1L/CAPRIN1/C9orf72/MCRIP1/DDX19B/ZFP36/CSDE1
GOCC_SMALL_RIBOSOMAL_SUBUNIT	GOCC_SMALL_RIBOSOMAL_SUBUNIT	73	0.365228	1.30737	0.024975	0.218752	0.187896	10591	tags=77%, list=57%, signal=33%	MRPS24/HBA2/HBA1/MRPS31/MRPS7/LARP4/MRPS12/RPS10/MRPS27/MRPS18B/MCTS1/DDX3X/MRPS21/MRPS17/RPS12/EIF2D/RPS27/MRPS35/UBA52/MRPS22/RPS9/RPS28/MRPS15/RPS23/RPS19/MRPS9/RPS3/RPS15A/RPS8/RPS24/RPS18/RPS4Y1/RPS25/MRPS28/RPS6/RPS15/RPSA/RPS20/RPS11/RPS16/MRPS2/RPS4Y2/RPS7/MRPS26/DHX29/MRPL42/MRPS34/MRPS16/MRPS6/MRPS33/RPS4X/RPS5/MRPS10/RPS2/RPS13/ISG15
GOMF_PHOSPHATASE_BINDING	GOMF_PHOSPHATASE_BINDING	192	0.319667	1.22452	0.024975	0.218752	0.187896	9083	tags=56%, list=49%, signal=29%	PPP1R27/SMTNL2/FCRL2/SMTNL1/PPP1R3G/DLG4/ANK1/PPP1R32/SPHK1/MTMR3/LILRB1/ERBB2/MAPK3/CD33/MAP2K7/CEP192/PPARA/RCAN3/CDH2/TSC2/DZIP3/FER/PPP6R1/CHCHD3/CNST/GTF2F1/NEK2/PPME1/CSF1R/PPP2R2A/KAT2A/SH3GL1/WNK1/SYK/SYTL2/CDH5/MASTL/PPP3CB/MAPT/SMG7/EIF4EBP1/EGFR/SHOC2/CEACAM1/MTMR9/PPP1CC/TERF2IP/PTPN1/ENSA/SNX3/VCP/GRB2/LCK/NFATC2/STRN/DLG1/JUP/STX17/PPP1R11/MAPK14/ARPP19/PPP1R18/AP3B1/CTSC/MAP3K5/KCN…
GOMF_RNA_HELICASE_ACTIVITY	GOMF_RNA_HELICASE_ACTIVITY	73	0.364136	1.30346	0.024975	0.218752	0.187896	9880	tags=67%, list=53%, signal=32%	DDX4/TDRD12/DDX25/DDX47/DHX58/DHX38/DDX60L/DDX31/DHX30/FANCM/DHX37/DDX52/DDX24/BRIP1/UPF1/DDX3Y/DDX18/DHX32/DDX20/DDX46/DDX3X/G3BP1/DDX50/YTHDC2/DDX59/DDX19A/DDX23/DDX28/DDX6/DDX39B/DDX60/RAD54B/SUPV3L1/SNRNP200/DDX39A/DHX57/DDX54/DHX29/DDX42/DDX27/DDX17/DDX19B/TDRD9/DHX15/IFIH1/DDX56/DDX58/DDX5/DDX49
GOBP_ENDOSOME_TO_LYSOSOME_TRANSPORT	GOBP_ENDOSOME_TO_LYSOSOME_TRANSPORT	53	0.386416	1.34565	0.025	0.218752	0.187896	8794	tags=60%, list=47%, signal=32%	PCDHGA3/HOOK2/VPS18/RILP/ADRB2/CLEC16A/MTM1/AKTIP/RHOB/VIPAS39/VPS39/UBXN6/VPS33A/VPS11/SNX27/CHMP5/DENND3/CHMP3/TSG101/VCP/RAB12/MGRN1/M6PR/SORT1/SNX16/BIN1/VPS16/LYST/STX8/VAMP7/RAB7B/HOOK3
GOBP_PHOSPHOLIPID_CATABOLIC_PROCESS	GOBP_PHOSPHOLIPID_CATABOLIC_PROCESS	45	0.400174	1.36598	0.0250752	0.218752	0.187896	7602	tags=51%, list=41%, signal=30%	PLA2G4D/PLA2G10/PLA2G15/ABHD6/PNPLA6/ABHD16A/GDPD1/APOC2/PLCG2/SMPDL3B/PLA2G6/SMPD1/IDH1/INPP5F/PLA2G4A/PLBD1/PRKCD/SCARB1/PLA2G4C/PNPLA7/GDPD3/PNPLA8/ABHD12
GOBP_CERAMIDE_METABOLIC_PROCESS	GOBP_CERAMIDE_METABOLIC_PROCESS	96	0.353508	1.2951	0.0250827	0.218752	0.187896	6791	tags=47%, list=36%, signal=30%	FUT3/ACER1/ST8SIA3/FUT6/ST8SIA2/CYP4F22/B3GALT2/P2RX1/ACER2/ALOXE3/TNF/ITGB8/ASAH2/SPHK1/B3GALT1/PLA2G15/ST6GALNAC4/GAL3ST1/B3GALT4/SAMD8/GALC/B4GALT3/NAGA/PLPP3/SGMS1/GM2A/CLN6/SGPL1/SMPD1/ST3GAL2/DEGS1/GBA2/SGMS2/HTRA2/ORMDL1/AGK/CERS6/NEU1/PRKCD/ST3GAL1/ST6GALNAC6/SPTSSA/ORMDL2/SIRT3/ORMDL3
GOBP_MAINTENANCE_OF_LOCATION	GOBP_MAINTENANCE_OF_LOCATION	306	0.300323	1.17111	0.0250827	0.218752	0.187896	9272	tags=55%, list=50%, signal=28%	NOS1/IGSF11/S100A7/HAP1/JPH3/PLA2G10/DRD1/TRPV1/S100A9/DRD2/SNCA/CASQ1/CD19/IL6/TMSB15B/APOB/SLC30A4/GSTM2/RYR3/ATP2A1/LPL/ANK2/GET4/TNF/NOL3/BSCL2/LCN2/INSIG1/CES1/NBL1/ACVR1C/INSIG2/APLNR/ABCA1/PFN4/HK1/MCOLN3/FTO/ZFYVE1/PKD1/SP100/STAT5B/PPARA/SUFU/TRPC1/SREBF2/PTK2B/CD36/CCDC22/GPSM2/AP3D1/FBN2/CDK5/SYNE1/VPS13C/CCDC88A/PLCG2/GOPC/PSEN1/MDFI/STARD4/GM2A/SCIN/GAA/CDS1/FAF1/ARL2/ASXL1/CD4/NR1H2…
GOBP_NEGATIVE_REGULATION_OF_DEVELOPMENTAL_GROWTH	GOBP_NEGATIVE_REGULATION_OF_DEVELOPMENTAL_GROWTH	99	0.349319	1.28177	0.0250827	0.218752	0.187896	8589	tags=51%, list=46%, signal=27%	DRAXIN/NTN1/PLAC8/PLXNA3/PI16/BBS2/PAK1/ADRB2/SEMA4F/LGMN/EPHA7/SEMA3B/SEMA3F/PPARA/PTCH1/SEMA4B/CDK5/SEMA4D/RYK/WNT3/RNF6/WWC3/YY1/RTN4R/JARID2/NRP1/G6PD/NKD1/GDF15/MAP2/TLL2/CDKN1A/RGS4/SEMA3C/SEMA5A/GJA1/BMP4/RGS2/FXN/FSTL4/TBX5/SAV1/FGF13/TP73/STK3/RAI1/NOG/SEMA4A/WNT3A/SEMA6A
GOBP_REGULATION_OF_INTRINSIC_APOPTOTIC_SIGNALING_PATHWAY	GOBP_REGULATION_OF_INTRINSIC_APOPTOTIC_SIGNALING_PATHWAY	149	0.330015	1.24722	0.0250827	0.218752	0.187896	9083	tags=59%, list=49%, signal=31%	S100A9/MUC1/NOL3/BDKRB2/MSX1/BECN1/DDIAS/RNF183/NACC2/EPO/CDKN2D/FIGNL1/CREB3/P4HB/MAPK7/CXCL12/SGMS1/FIS1/MAPK8IP1/ZNF385A/BBC3/TMEM161A/BCL2L2/IVNS1ABP/PPIF/ING2/PDX1/HSPA1A/GPX1/DDX3X/PYCARD/NDUFS3/VDAC2/RIPK3/PTPN1/HTRA2/SOD2/PARK7/HYOU1/LCK/USP47/PLAUR/CD74/ARMC10/NUPR1/BCLAF1/NCK2/GRINA/NKX3-1/URI1/DNM1L/RPS3/ENO1/RPL11/HDAC1/PIAS4/MCL1/RPL26/NFE2L2/TAF9B/PRKN/MIF/SOD1/CLU/SRC/VNN1/PPIA/TMB…
GOBP_REGULATION_OF_LONG_TERM_SYNAPTIC_POTENTIATION	GOBP_REGULATION_OF_LONG_TERM_SYNAPTIC_POTENTIATION	43	0.410833	1.39546	0.0252086	0.219562	0.188592	8424	tags=65%, list=45%, signal=36%	IGSF11/CHRNA7/CYP46A1/DRD2/SCGN/CRTC1/CALB2/ADORA2A/LGMN/EPHA4/NRGN/ARC/AGER/NCSTN/CREB1/MME/EIF2AK4/NPTN/APOE/PPP1R9A/CALB1/APP/STAU1/AKAP5/RELN/TYROBP/EPHB2/ADCY1
GOBP_PTERIDINE_CONTAINING_COMPOUND_METABOLIC_PROCESS	GOBP_PTERIDINE_CONTAINING_COMPOUND_METABOLIC_PROCESS	32	0.432361	1.41345	0.0253036	0.220102	0.189056	8143	tags=66%, list=44%, signal=37%	PIPOX/MTHFS/GGH/ALDH1L1/MTHFR/TYMS/SLC19A1/GART/MTR/SHMT2/DHFR/ALDH1L2/GCH1/PTS/MTHFD1L/SLC25A32/SPR/QDPR/FOLR2/ATIC/MTRR
GOMF_SH3_DOMAIN_BINDING	GOMF_SH3_DOMAIN_BINDING	127	0.338614	1.26391	0.0253831	0.220505	0.189402	10343	tags=67%, list=55%, signal=30%	DRD4/ESPN/SHANK1/SYNGAP1/ELMO3/ITGB1BP2/AFAP1L2/RAD9A/ARHGAP6/INPP5J/AFAP1L1/ADAM9/CIT/SOCS7/ADAM17/INPP5D/RUFY1/SHANK2/CABYR/LRP2/DOCK4/RUFY2/SH3GL1/ARHGAP17/CD2AP/PLSCR1/REPS1/USP8/MAPT/SH3BGRL/ENKUR/CBLB/ADAM10/GPX1/UVRAG/SGIP1/HIP1R/SOS1/ARHGAP1/WIPF3/SH3KBP1/SYNJ1/ABI1/TOM1L1/GRB2/ENAH/CCDC6/SH3BGR/PTPN6/SH3BP2/CD3E/ELMO2/LYN/GJA1/PRKN/CNTNAP1/KHDRBS3/ABI2/CRK/RAPGEF1/CBL/SH2D2A/SH3BP5/CTTNB…
GOBP_REGULATION_OF_ERYTHROCYTE_DIFFERENTIATION	GOBP_REGULATION_OF_ERYTHROCYTE_DIFFERENTIATION	44	0.408537	1.39103	0.0254849	0.221102	0.189915	9348	tags=82%, list=50%, signal=41%	ZFP36L1/HOXA5/STAT5B/LDB1/MAFB/INPP5D/P4HTM/CDK6/PRMT1/ARNT/BRD1/HSPA1A/GATA1/RBFOX2/HMGB2/MED1/STAT1/ETS1/MAPK14/SPI1/ANKRD54/KAT7/ZNF16/LYN/INHBA/ZFPM1/ACVR1B/PRKDC/FAM210B/SMAP1/HSPA1B/NCKAP1L/NCAPG2/ZFP36/HIF1A/GATA2
GOBP_RENAL_SYSTEM_VASCULATURE_DEVELOPMENT	GOBP_RENAL_SYSTEM_VASCULATURE_DEVELOPMENT	25	0.45969	1.43828	0.025641	0.222122	0.190791	7382	tags=60%, list=40%, signal=36%	FOXC2/TCF21/BMP7/WT1/TEK/IL6R/PDGFB/NOTCH2/ACTA2/OSR1/BMP4/CD34/PDGFD/HES1/ANGPT2
GOBP_ORGANIC_HYDROXY_COMPOUND_BIOSYNTHETIC_PROCESS	GOBP_ORGANIC_HYDROXY_COMPOUND_BIOSYNTHETIC_PROCESS	238	0.312208	1.20646	0.0256835	0.222122	0.190791	10621	tags=64%, list=57%, signal=28%	APOA5/TH/LDHC/CYP8B1/ACER1/DBH/ITPKA/CYP7A1/CYP46A1/HMGCS2/DKKL1/SNCA/DCT/MALRD1/BAAT/PNMT/ACER2/TPH1/APOB/ASIP/IPPK/HSD17B1/HSD17B3/TNF/SEC14L2/ASAH2/SPHK1/CYP51A1/INSIG1/CES1/CLCN2/CFTR/INSIG2/ERLIN2/GPAM/FDPS/SLC27A2/SCD/MBTPS1/PMVK/PER2/ACOT8/TRPC1/REST/SREBF2/PTK2B/OSBPL3/CYP2R1/TM7SF2/AKR1D1/PRKAA2/HSD17B10/PLCG2/STARD4/MFSD12/HSD3B7/NFYB/RAN/GOT1/HMGCR/PARK7/G6PD/HRH1/AGK/CYB5R3/CYP27B1/DH…
GOBP_NON_MOTILE_CILIUM_ASSEMBLY	GOBP_NON_MOTILE_CILIUM_ASSEMBLY	51	0.397465	1.37511	0.0257865	0.222122	0.190791	9740	tags=69%, list=52%, signal=33%	HAP1/CCDC13/BBS2/CEP131/BBS1/CEP89/DCTN1/CEP126/BBS7/INTU/DYNC2H1/C2CD3/IFT57/RPGRIP1L/CEP350/PIBF1/IFT74/MAP4/TMEM216/ATMIN/TOGARAM1/WRAP73/DYNLL1/MAK/IFT122/CEP250/FUZ/ARL13A/IFT80/BBS10/IFT140/PCM1/CEP135/TMEM80/VANGL2
GOBP_B_CELL_MEDIATED_IMMUNITY	GOBP_B_CELL_MEDIATED_IMMUNITY	113	0.34374	1.27239	0.025974	0.222122	0.190791	8072	tags=54%, list=43%, signal=31%	FCER2/MASP2/CR2/NOD2/LTA/CD19/TFRC/TNF/TCIRG1/BTK/C4B/KMT5C/RNF168/EXOSC6/IL4R/CD226/MLH1/INPP5D/THOC1/RIF1/C1RL/GAPT/MSH2/SWAP70/CD46/CD70/ERCC1/FCER1G/TP53BP1/FCGR2B/C5/IRF7/C8G/CD74/HLA-E/PTPN6/PRKCD/HLA-DRB1/CR1/C1QC/HPX/HMCES/SLA2/C6/PTPRC/HLA-DQB1/NBN/BATF/HSPD1/CLU/C4A/BCL6/LIG4/MYD88/BCL3/EXOSC3/CFI/PAXIP1/C4BPB/C1QB/CD27
GOBP_ESTABLISHMENT_OF_PROTEIN_LOCALIZATION_TO_ENDOPLASMIC_RETICULUM	GOBP_ESTABLISHMENT_OF_PROTEIN_LOCALIZATION_TO_ENDOPLASMIC_RETICULUM	113	0.343411	1.27118	0.025974	0.222122	0.190791	10629	tags=72%, list=57%, signal=31%	TRAM2/SEC61A2/RPL21/SEC61G/SPCS3/TRAM1L1/RPS10/SEC61A1/SRP54/MAN1A1/RPS12/RPL3/SRPRB/RPS27/RAB3GAP2/SPCS1/UBA52/RPS9/RPS28/SEC61B/RPL23A/RPL31/RPS23/RPS19/RPL37A/RPS3/RPS15A/RPL18/RPL11/RPL28/RPL5/RPL32/SGTB/RPS8/RPS24/RPS18/RPL26/RPS4Y1/RPS25/RPL14/RPL24/RPLP1/EDEM1/RPL27A/RPL10/RPS6/RAB10/RPS15/SEC63/RPSA/RPS20/RPL36/RPS11/RPS16/RPLP0/RYR2/SRPRA/SPCS2/RPS7/RAB3GAP1/HERPUD1/RPL9/SRP68/RPL23/RPL8…
GOBP_MITOCHONDRIAL_RESPIRATORY_CHAIN_COMPLEX_ASSEMBLY	GOBP_MITOCHONDRIAL_RESPIRATORY_CHAIN_COMPLEX_ASSEMBLY	98	0.350279	1.28439	0.025974	0.222122	0.190791	9789	tags=62%, list=53%, signal=30%	TAZ/NDUFS6/NDUFS8/UQCC3/NDUFAF8/TTC19/LYRM7/NDUFA10/NDUFA11/NUBPL/COX16/NDUFC1/COA5/SCO2/SDHAF4/NDUFA6/NDUFS3/NDUFB7/C12orf73/COX18/TACO1/TMEM126B/NDUFA8/NDUFA12/NDUFB9/SDHAF3/NDUFA9/NDUFA5/ACAD9/SAMM50/NDUFB1/UQCC2/UQCRFS1/NDUFB4/NDUFV3/NDUFB8/COX19/MT-ND4/TFAM/NDUFAF6/MT-ND5/NDUFB11/AIFM1/MT-ND6/COX20/NDUFAF2/PET117/NDUFAF5/SURF1/NDUFS5/NDUFB10/OMA1/SMIM20/NDUFA13/NDUFB3/NDUFAF7/SDHAF2/NDUFC2/S…
GOBP_NEGATIVE_REGULATION_OF_CELL_CYCLE_G1_S_PHASE_TRANSITION	GOBP_NEGATIVE_REGULATION_OF_CELL_CYCLE_G1_S_PHASE_TRANSITION	102	0.34419	1.26697	0.025974	0.222122	0.190791	9292	tags=60%, list=50%, signal=30%	C10orf99/CDKN2A/MUC1/CNOT1/BRD7/CRADD/TNKS1BP1/ARID3A/NACC2/BTG2/CDKN2D/E2F4/CDK4/RBL1/CARM1/CDC25C/CDK6/KANK2/ZNF385A/PRMT1/PLK3/MDM4/CDK2AP2/FBXO7/CCL2/EP300/CNOT6/AURKA/CNOT6L/CNOT4/GADD45A/CASP2/DLG1/SUSD2/FHL1/PML/PCBP4/RPL26/CDKN1A/CNOT3/RB1/ATM/FBXO31/MYO16/CNOT11/CDKN2B/CHEK2/E2F1/PRKDC/APC/TRIAP1/CCND1/GJC2/EZH2/GFI1B/JADE1/RPA2/FAM107A/RBL2/CNOT8/GTSE1
GOBP_POSITIVE_REGULATION_OF_INTRACELLULAR_PROTEIN_TRANSPORT	GOBP_POSITIVE_REGULATION_OF_INTRACELLULAR_PROTEIN_TRANSPORT	177	0.322438	1.23065	0.025974	0.222122	0.190791	9541	tags=57%, list=51%, signal=28%	CHP2/PDZK1/SLC51B/CAMK1/CEP131/SHH/PAK1/ERBB2/HSPA1L/BCAS3/ABLIM3/HUWE1/HDAC3/SREBF2/CDK5/ECT2/FIS1/PDCD10/VPS11/NUTF2/PSEN1/BBC3/RBM22/MIEF2/RIOK2/FYN/MYO1C/PLK3/RAC2/RAN/RNF31/OAZ2/TPR/CHP1/MICALL2/PPP1R13B/ITGB1BP1/HSP90AB1/TARDBP/GZMB/DMAP1/HTRA2/TCAF1/OAZ1/CTDSPL2/STOM/UBR5/SH3GLB1/YWHAB/YWHAG/JAK2/JUP/PRKCD/TMEM30B/MAPK14/YWHAQ/RHOU/TRIM28/CASP8/TCF7L2/EDEM1/UBE2D3/EFCAB7/FZD5/YWHAE/PPP3CC/…
GOBP_REGULATION_OF_CELL_JUNCTION_ASSEMBLY	GOBP_REGULATION_OF_CELL_JUNCTION_ASSEMBLY	189	0.319658	1.22326	0.025974	0.222122	0.190791	9226	tags=52%, list=49%, signal=27%	CLDN19/IL1RAPL2/LRRTM1/AMIGO3/CHRNB2/LRTM2/GRID2/SLIT1/ADGRB3/FLRT3/SNCA/NTN1/LRRN3/DLG5/TNF/IL1RAPL1/GPC6/BCAS3/ARHGAP6/BHLHB9/DLC1/EPHA7/LRFN3/TEK/TSC1/NLGN2/LDB1/TLR2/LRFN1/SEMA4D/CLASP2/DUSP3/NPHP1/SDC4/ADGRL2/PTPRA/SETD5/MYO1C/ADGRB1/EEF2K/ITGB1BP1/CUX2/RUNX1/NTNG2/RAC1/SYNDIG1/NRP1/NRXN1/BDNF/EIF4G1/MAP4K4/LRRTM2/SIX4/CLDN3/SLITRK5/SLK/SRPX2/RCC2/IL1RAP/LHFPL4/RAP1B/PTPRD/GJA1/PPM1F/WDPCP/F…
GOMF_N_ACYLTRANSFERASE_ACTIVITY	GOMF_N_ACYLTRANSFERASE_ACTIVITY	85	0.360489	1.30888	0.0259839	0.222122	0.190791	6216	tags=45%, list=33%, signal=30%	NAT8/AANAT/NAA11/BAAT/ALAS2/NAT8L/TADA2A/KAT5/MCM3AP/KAT6A/TADA3/NCOA3/SIRT7/ELP3/TAF1/NAT9/NAA10/NAA16/KAT2A/BRPF1/HAT1/BRD1/ALAS1/EP300/NCOA1/GTF3C4/SRCAP/KAT2B/NAT10/GNPNAT1/HGSNAT/CERS6/CREBBP/NAA60/NAA50/MEAF6/KAT7/EPC1
GOBP_REGULATION_OF_MEGAKARYOCYTE_DIFFERENTIATION	GOBP_REGULATION_OF_MEGAKARYOCYTE_DIFFERENTIATION	54	0.392964	1.37178	0.0260099	0.222122	0.190791	9524	tags=69%, list=51%, signal=34%	PRKCQ/ITGA2B/TESC/TNRC6B/TNRC6A/AGO1/SCIN/PRMT1/THPO/KMT2E/EP300/RUNX1/GATA1/KAT2B/EIF6/AGO3/CNOT4/HMGB2/HDAC1/MTURN/DPY30/ZNF16/WDR5/LOX/SETD1A/AGO4/ZFPM1/ASH2L/SIN3A/CIB1/KMT2D/KMT2B/KMT2A/RAB7B/GATA2/MEF2C/FAXDC2
GOBP_NEGATIVE_REGULATION_OF_UBIQUITIN_DEPENDENT_PROTEIN_CATABOLIC_PROCESS	GOBP_NEGATIVE_REGULATION_OF_UBIQUITIN_DEPENDENT_PROTEIN_CATABOLIC_PROCESS	48	0.397376	1.37101	0.026026	0.222122	0.190791	8473	tags=58%, list=45%, signal=32%	SHH/QRICH2/HFE/MAP1A/MTM1/SUFU/TAF1/TRIM39/PSEN1/OGT/HIPK2/SMARCC1/HSP90AB1/PARK7/CSNK2A1/WAC/USP7/SVIP/RPL11/PML/RPL5/SDCBP/EIF3H/DDRGK1/RPS7/N4BP1/BAG6/RPL23
GOBP_NEGATIVE_REGULATION_OF_SMALL_GTPASE_MEDIATED_SIGNAL_TRANSDUCTION	GOBP_NEGATIVE_REGULATION_OF_SMALL_GTPASE_MEDIATED_SIGNAL_TRANSDUCTION	55	0.392834	1.37393	0.0260359	0.222122	0.190791	8308	tags=58%, list=45%, signal=32%	RASA4/SYNGAP1/CGNL1/RIPOR2/DLC1/RASAL3/KCTD10/RASA1/SPRY1/NUP62/HEG1/FBP1/PPP2CB/CD2AP/KCTD13/TIMP2/MAPKAP1/ARHGAP12/RASA2/STMN1/TGFB2/ARHGAP24/CUL3/ARHGAP35/STMN3/ABL2/BCL6/RAPGEF1/RASIP1/KANK1/SLIT2/EPHB2
GOMF_PHOSPHOTRANSFERASE_ACTIVITY_FOR_OTHER_SUBSTITUTED_PHOSPHATE_GROUPS	GOMF_PHOSPHOTRANSFERASE_ACTIVITY_FOR_OTHER_SUBSTITUTED_PHOSPHATE_GROUPS	20	0.487021	1.4603	0.0261233	0.222385	0.191017	6732	tags=60%, list=36%, signal=38%	PIGO/PIGG/SAMD8/PIGF/SGMS1/CDS1/SELENOI/SGMS2/CHPT1/PTDSS1/PGS1/PTDSS2
GOBP_NUCLEOTIDE_BINDING_DOMAIN_LEUCINE_RICH_REPEAT_CONTAINING_RECEPTOR_SIGNALING_PATHWAY	GOBP_NUCLEOTIDE_BINDING_DOMAIN_LEUCINE_RICH_REPEAT_CONTAINING_RECEPTOR_SIGNALING_PATHWAY	40	0.411641	1.38728	0.0261569	0.222385	0.191017	9739	tags=62%, list=52%, signal=30%	NOD2/SLC15A2/IRGM/UBE2V1/ERBIN/TAB3/IRAK1/TAB1/HSPA1A/RNF34/UBA52/IRAK2/CASP8/RELA/RIPK2/NFKBIA/NOD1/TLR4/PTPN22/IKBKG/MAP2K6/HSPA1B/UBB/SLC15A3/XIAP
GOMF_HISTONE_LYSINE_N_METHYLTRANSFERASE_ACTIVITY	GOMF_HISTONE_LYSINE_N_METHYLTRANSFERASE_ACTIVITY	42	0.413983	1.40079	0.0261669	0.222385	0.191017	8593	tags=52%, list=46%, signal=28%	PRDM16/N6AMT1/EHMT2/KMT5C/MECOM/DOT1L/SETD7/SETD5/MEN1/SETD2/SMYD2/SETD1B/SETD3/WDR5/SETD1A/ASH1L/SETDB2/ASH2L/KMT2D/KMT2B/EZH2/KMT2A
GOBP_HISTONE_H3_DEACETYLATION	GOBP_HISTONE_H3_DEACETYLATION	19	0.498805	1.48	0.0262055	0.222429	0.191055	7171	tags=68%, list=38%, signal=42%	PER2/HDAC11/SIRT7/HDAC3/SIRT2/ELK4/HDAC4/HDAC5/HDAC2/HDAC8/HDAC1/HDAC9/HDAC6
GOMF_OXIDOREDUCTASE_ACTIVITY_ACTING_ON_THE_CH_CH_GROUP_OF_DONORS_NAD_OR_NADP_AS_ACCEPTOR	GOMF_OXIDOREDUCTASE_ACTIVITY_ACTING_ON_THE_CH_CH_GROUP_OF_DONORS_NAD_OR_NADP_AS_ACCEPTOR	26	0.456931	1.44234	0.0265577	0.225132	0.193377	8824	tags=65%, list=47%, signal=34%	SRD5A1/TBXAS1/TM7SF2/AKR1D1/AKR1C2/PTGR2/SRD5A3/ZADH2/FASN/AKR1C3/PTGR1/DHCR24/TECR/DECR1/SRD5A2/DPYD/LBR
GOBP_REGULATION_OF_PROTEIN_IMPORT	GOBP_REGULATION_OF_PROTEIN_IMPORT	58	0.381705	1.34305	0.0266112	0.2253	0.19352	9380	tags=69%, list=50%, signal=34%	CHP2/SHH/CABP1/SUFU/HDAC3/CD36/ECT2/NUTF2/PSEN1/RBM22/NUP62/RAN/TPR/CHP1/HSP90AB1/TARDBP/DMAP1/MDFIC/UBR5/NOLC1/JAK2/JUP/PRKCD/MAPK14/TRIM28/UFM1/PKIA/EFCAB7/BMP4/GLI3/IPO5/SMO/PIK3R2/NUP54/ZC3H12A/FERMT1/IFNG/ANGPT1/RAB23/HYAL2
GOBP_MITOTIC_RECOMBINATION	GOBP_MITOTIC_RECOMBINATION	24	0.460054	1.42811	0.0267765	0.225984	0.194108	7983	tags=62%, list=43%, signal=36%	ZSCAN4/DMC1/MLH1/MSH3/TERF2/ERCC4/ERCC1/ERCC2/SMC5/RAD50/TPRKB/NSMCE2/RAD51C/RAD54B/GEN1
GOBP_RNA_LOCALIZATION	GOBP_RNA_LOCALIZATION	227	0.31237	1.20351	0.0268851	0.225984	0.194108	9851	tags=58%, list=53%, signal=28%	NXF3/IGF2BP3/RBFOX1/DDX25/MX2/SMG6/DHX38/POM121/NUP210/KIF5C/ZFP36L1/MCM3AP/TSC1/TOMM20L/SENP2/ARC/IWS1/SYMPK/LSG1/PARP11/CPSF4/THOC1/NOP9/NUP133/ZNF385A/PRPF6/XPO5/TERF2/NUTF2/UPF1/NUP62/SRSF5/RIOK2/CPSF3/MYO1C/FIP1L1/RAN/TPR/AGFG1/RUVBL2/RNPS1/SMG7/CPSF6/SARNP/SETD2/NUP50/EIF6/YY1/CPSF2/EIF5A/CETN2/CCT5/PARN/UPF2/NXF1/NUP214/SRSF2/NCBP1/YBX1/NUP37/MRPL18/NPM1/ATXN2/RBM8A/HNRNPA1/NDC1/SEH1L/CASC…
GOBP_VIRAL_GENE_EXPRESSION	GOBP_VIRAL_GENE_EXPRESSION	196	0.321104	1.23094	0.0268851	0.225984	0.194108	10703	tags=67%, list=57%, signal=29%	TRIM31/POM121/NUP210/TARBP2/TRIM21/EIF3G/REST/RPL21/HEXIM1/MID2/MON1B/POLR2A/CCNT1/NUP133/GTF2F1/NELFCD/UBP1/NUP62/SMARCB1/SPCS3/GTF2F2/TAF11/RPS10/TPR/CCNT2/MCTS1/EP300/TRIM27/TRIM11/NUP50/TARDBP/RPS12/MDFIC/PCBP2/EIF2D/RPL3/USF1/RPS27/DENR/NUP214/SPCS1/EIF2AK4/UBA52/RPS9/RPS28/RPL23A/RPL31/CCL4/NUP37/RPS23/RPS19/RPL37A/RPS3/RPS15A/RPL18/RPL11/HDAC1/RPL28/RPL5/RPL32/NDC1/RPS8/SEH1L/RPS24/RPS18/R…
GOBP_CHROMOSOME_SEPARATION	GOBP_CHROMOSOME_SEPARATION	91	0.351858	1.2833	0.026973	0.225984	0.194108	8401	tags=53%, list=45%, signal=29%	TEX14/DUSP1/USP44/PLK1/CDT1/RECQL5/FANCM/MLH1/HECW2/DIS3L2/ANAPC1/ZWINT/EME2/CDC26/TACC3/NUMA1/RIOK2/ANAPC11/LCMT1/CENPS/NCAPH2/PLSCR1/TPR/IK/ERCC4/CDC6/AURKB/TOP3A/PSMG2/CSNK2A1/CENPF/MAD1L1/CDC23/CUL3/ANAPC15/RB1/ATM/TTK/CDC16/KLHL22/NSMCE2/BUB3/APC/MAD2L1/GEN1/SPDL1/TOP2B/BUB1B
GOBP_GLIOGENESIS	GOBP_GLIOGENESIS	270	0.303753	1.17924	0.026973	0.225984	0.194108	8653	tags=50%, list=46%, signal=27%	NCMAP/LTA/S100A9/ASCL1/GPR37L1/IL6/ASCL2/AZU1/CCR2/CRB1/MYB/TNF/ADGRG1/PLP1/SHH/ERBB2/HDAC10/PLAG1/OLIG1/KCNJ10/LRP8/TIAM1/MAPK3/ADORA2A/EPHA4/GAP43/ARHGEF10/CNP/HDAC11/SERPINE2/ATP1B2/AGER/CDH2/PTK2B/BACE2/TLR2/CDK5/SIRT2/NCSTN/MPP5/GPR157/LRP2/DAAM2/CDK6/TMEM98/P2RY12/PSEN1/SPINT1/CRKL/PRPF19/CSF1R/NF2/ZNF365/EGR2/ADGRG6/CREB1/MAPT/DICER1/CCL2/EGFR/TREM2/ERCC2/PPP1CC/RNF10/IDH2/HDAC2/PTPN11/DLL…
GOBP_POSITIVE_REGULATION_OF_TYPE_I_INTERFERON_PRODUCTION	GOBP_POSITIVE_REGULATION_OF_TYPE_I_INTERFERON_PRODUCTION	75	0.362454	1.30152	0.026973	0.225984	0.194108	7893	tags=55%, list=42%, signal=32%	MMP12/DHX58/TLR7/IRF5/ZBP1/IRF3/TLR3/POLR3B/POLR3F/TLR2/CD14/PLCG2/SYK/IRAK1/SETD2/EP300/DDX3X/XRCC6/IRF1/POLR3E/POLR3G/IRF7/HMGB2/TOMM70/PTPN11/STAT1/NFKB2/RIOK3/CREBBP/POLR3H/RELA/TICAM1/HSPD1/RIPK2/POLR3C/PRKDC/MYD88/NFKB1/TLR4/PTPN22/IFI16
GOBP_POSITIVE_REGULATION_OF_T_CELL_PROLIFERATION	GOBP_POSITIVE_REGULATION_OF_T_CELL_PROLIFERATION	96	0.34782	1.27427	0.026973	0.225984	0.194108	9976	tags=62%, list=54%, signal=29%	IL1A/TNFRSF13C/CLECL1/IL6/IL23A/CCR2/PRKCQ/TFRC/SHH/ZAP70/CD274/HHLA2/GPAM/EPO/PNP/STAT5B/LGALS9/RASAL3/CCDC88B/AGER/CD4/SYK/CD46/CD70/PYCARD/HLA-A/IGFBP2/CD1D/IL6ST/SELENOK/HLA-E/NCK2/VCAM1/RPS3/CD3E/PDCD1LG2/PTPRC/CCL19/JAK3/ICOSLG/IGF1/RIPK2/HES1/NCK1/PTPN22/IL2RA/TNFSF9/CD209/CD24/CORO1A/NCKAP1L/TNFSF13B/CARD11/ZP3/SASH3/CD80/HLA-DPA1/IGF2/CD276/IL27RA
GOCC_FICOLIN_1_RICH_GRANULE	GOCC_FICOLIN_1_RICH_GRANULE	183	0.320889	1.22627	0.026973	0.225984	0.194108	9439	tags=56%, list=51%, signal=28%	CALML5/A1BG/PYGL/ALDOC/HBB/MNDA/TCIRG1/SLC2A3/ALAD/CAPN1/NBEAL2/PNP/AP2A2/GMFG/HUWE1/CANT1/PGAM1/PLEKHO2/DSP/ITGAX/COTL1/GAA/TMEM179B/ATP6V0A1/PAFAH1B2/IDH1/HSPA1A/LRG1/IMPDH1/ATP6V0C/HSP90AB1/ACTR10/DDX3X/C1orf35/TIMP2/XRCC6/PRCP/FCER1G/LAMTOR1/LAMP2/KCMF1/COMMD3/RAC1/VCP/CAB39/GPI/YPEL5/TRPM2/KPNB1/PSMD13/PSMC2/PPIE/CRISPLD2/JUP/IMPDH2/MAPK14/PSMD11/CDA/PSMD3/CR1/PSMB7/STBD1/PSMA2/PDAP1/ARPC5/P…
GOBP_SELECTIVE_AUTOPHAGY	GOBP_SELECTIVE_AUTOPHAGY	60	0.37479	1.32253	0.027027	0.225984	0.194108	8133	tags=57%, list=44%, signal=32%	NOD2/KLHL3/BECN1/ADRB2/ATG2A/MAPK3/RETREG3/HUWE1/MAP1LC3C/TSC2/VPS13C/USP30/RNF41/AMBRA1/VDAC1/HTRA2/RETREG1/UFC1/VPS13D/STBD1/UFM1/RB1CC1/CALCOCO2/PRKN/TIGAR/LGALS8/DDRGK1/SESN2/RIPK2/HDAC6/AUP1/SPTLC2/NOD1/MAP1LC3B
GOBP_REGULATION_OF_SMOOTH_MUSCLE_CONTRACTION	GOBP_REGULATION_OF_SMOOTH_MUSCLE_CONTRACTION	52	0.385626	1.33763	0.0270541	0.225984	0.194108	8122	tags=60%, list=44%, signal=34%	NPY2R/CHRM2/SPX/CHRNA3/ADRA2B/EDN2/P2RX1/ITGA2/TACR1/NMU/SPHK1/KIT/ADRB2/ADA/DOCK4/PRKG1/TBXA2R/ZDHHC21/PTAFR/SETD3/GPER1/CHRM3/CALCRL/SOD1/ORMDL3/RGS2/ADRA2A/SRF/CNN1/DAPK3/CAV1
GOBP_T_CELL_MEDIATED_CYTOTOXICITY	GOBP_T_CELL_MEDIATED_CYTOTOXICITY	44	0.40429	1.37657	0.0270812	0.225984	0.194108	6397	tags=45%, list=34%, signal=30%	SLC22A13/KLRC1/IL23A/LILRB1/AZGP1/GZMM/AGER/PPP3CB/CEACAM1/HLA-A/RIPK3/FCGR2B/CD1D/HLA-E/HLA-DRB1/HLA-F/CTSC/MICA/PTPRC/HPRT1
GOBP_INTRINSIC_APOPTOTIC_SIGNALING_PATHWAY_IN_RESPONSE_TO_DNA_DAMAGE_BY_P53_CLASS_MEDIATOR	GOBP_INTRINSIC_APOPTOTIC_SIGNALING_PATHWAY_IN_RESPONSE_TO_DNA_DAMAGE_BY_P53_CLASS_MEDIATOR	43	0.402284	1.36643	0.0271084	0.225984	0.194108	8335	tags=63%, list=45%, signal=35%	MUC1/DDIT4/CDIP1/ZNF385A/TMEM109/MSH2/ING2/HIPK2/EP300/PYCARD/CD74/NUPR1/PML/RPL26/CDKN1A/TAF9B/AEN/MIF/TOPORS/CHEK2/SNW1/BCL3/TRIAP1/SHISA5/TP73/IFI16/BAG6
GOBP_PEPTIDYL_LYSINE_TRIMETHYLATION	GOBP_PEPTIDYL_LYSINE_TRIMETHYLATION	40	0.410751	1.38428	0.027163	0.225984	0.194108	8593	tags=65%, list=46%, signal=35%	METTL21C/KMT5C/ZNF304/WDR61/SETD4/IWS1/ETFBKMT/ARID4A/SMARCB1/SETD5/PWP1/OGT/KMT2E/SETD2/ZNF335/SETD1B/SETD3/TET3/SETD1A/ZNF274/BRD4/CTR9/BEND3/TET2/KMT2D/KMT2A
GOMF_T_CELL_RECEPTOR_BINDING	GOMF_T_CELL_RECEPTOR_BINDING	11	0.572628	1.51102	0.0271669	0.225984	0.194108	6048	tags=73%, list=32%, signal=49%	CD3G/EPS8L1/FYN/HLA-A/LCK/HLA-E/HLA-DRB1/CD3E
GOBP_INNER_MITOCHONDRIAL_MEMBRANE_ORGANIZATION	GOBP_INNER_MITOCHONDRIAL_MEMBRANE_ORGANIZATION	37	0.418102	1.39322	0.0272452	0.226353	0.194425	8753	tags=65%, list=47%, signal=34%	MTX3/DNAJC11/CHCHD6/TAZ/APOOL/AFG3L2/CHCHD3/UQCC3/IMMT/MTX2/TIMM10B/GHITM/AGK/TOMM70/TIMM8B/MT-ATP6/ROMO1/SAMM50/TIMM22/MTX1/OMA1/MAIP1/TMEM11/NDUFA13
GOBP_QUINONE_METABOLIC_PROCESS	GOBP_QUINONE_METABOLIC_PROCESS	34	0.418511	1.37784	0.0274112	0.226838	0.194841	4153	tags=44%, list=22%, signal=34%	CYP4F3/AKR1B10/ADH4/CYP4F12/CBR3/COQ3/COQ9/COQ10A/COQ6/AKR1C2/FDXR/COQ8A/PPTC7/AIFM2/COQ8B
GOBP_RESPONSE_TO_INSULIN	GOBP_RESPONSE_TO_INSULIN	263	0.308203	1.19493	0.0274858	0.226838	0.194841	9131	tags=55%, list=49%, signal=29%	PKLR/AGRP/AANAT/FFAR3/FOXC2/ATP6V0A4/PRKCQ/GPLD1/TNFSF10/LPL/MZB1/GAL/TCIRG1/INSIG1/GGH/PAK1/LPIN3/CPEB1/ACVR1C/INSIG2/PRKCZ/SRD5A1/TBC1D4/BAIAP2/ZFP36L1/TSC1/PPARA/GRB10/CDK4/SH2B2/TNS2/WDTC1/TSC2/PID1/ZBTB7B/TLR2/UCP2/BAIAP2L1/FER/SNX5/VPS13C/ATP6V1D/SHC1/PIK3R3/PTPRA/HDAC5/SRSF5/MYO1C/ATP6V0E2/ATP6V0A1/ATP6V1A/EGR2/OGT/HSD11B2/ATP6V1H/EEF2K/GOT1/ATP6V1E2/ATP6V0C/SMARCC1/SOS1/CEACAM1/SLC2A4/CAV…
GOMF_PROTEIN_N_TERMINUS_BINDING	GOMF_PROTEIN_N_TERMINUS_BINDING	106	0.349587	1.28678	0.0274858	0.226838	0.194841	7311	tags=50%, list=39%, signal=31%	ALOX5AP/LRP8/TARBP2/TSC1/TDRD7/THAP7/NCOA3/SRRM2/MAU2/EXOC4/ID1/GLRX/GTF2H3/ZWINT/PDCD10/NIPBL/TAF11/ZMYND8/MEN1/ERCC4/HSPA1A/MORF4L1/HAX1/EXOC2/CALM2/SMARCC1/NCOA1/ERCC2/PPP1CC/PEX19/EIF5A/CSNK2A1/GADD45A/PIAS3/PEX5/SCFD1/CFAP36/HDAC1/YWHAQ/SLA2/SDCBP/KLHL13/RELA/CALM1/ATM/DCN/NBN/KCNIP2/PDLIM5/GTF2H2/DAXX/VPS25/ACOX1
GOBP_POSITIVE_REGULATION_OF_TELOMERE_CAPPING	GOBP_POSITIVE_REGULATION_OF_TELOMERE_CAPPING	17	0.512031	1.4869	0.0275132	0.226838	0.194841	4771	tags=53%, list=26%, signal=39%	PRKCQ/RTEL1/MAPK3/MAP2K7/MAP3K4/NEK2/NABP2/AURKB/NEK7
GOMF_CERAMIDE_BINDING	GOMF_CERAMIDE_BINDING	17	0.513283	1.49053	0.0275132	0.226838	0.194841	4624	tags=41%, list=25%, signal=31%	GLTPD2/PLEKHA8/VDAC2/VDAC1/LAPTM4B/RTN4R/PLA2G4A
GOBP_POSITIVE_REGULATION_OF_DNA_BINDING_TRANSCRIPTION_FACTOR_ACTIVITY	GOBP_POSITIVE_REGULATION_OF_DNA_BINDING_TRANSCRIPTION_FACTOR_ACTIVITY	262	0.307842	1.19371	0.0277862	0.226838	0.194841	9978	tags=62%, list=54%, signal=29%	TRIM31/EPHA5/NOD2/S100A9/BEX1/EDA2R/IL6/PRKCQ/TRIM34/NLRP3/TRIM6/FANK1/ESR2/TFRC/TNF/SPHK1/SHH/KIT/CRTC1/LRP8/PRKCZ/BTK/TLR3/DDR2/JMY/UBE2V1/ESR1/TRIM22/TIRAP/LGALS9/TRIM21/LRP6/AGER/SLCO3A1/STK36/CD36/TLR2/MID2/PLPP3/TAF1/FER/CYTL1/ARID5B/PRKD2/IRAK3/CARD16/SMARCB1/PSMA6/HDAC4/HDAC5/TAB3/RNF31/IRAK1/TRIM26/RNF41/RBCK1/TAB1/FZD4/HIPK2/HSPA1A/TRAPPC9/EP300/CRTC3/PYCARD/TRIM27/DVL2/MTPN/RIPK3/TERF2…
GOCC_DENDRITIC_SHAFT	GOCC_DENDRITIC_SHAFT	32	0.433959	1.41867	0.0278475	0.226838	0.194841	7582	tags=66%, list=41%, signal=39%	GRM7/KIRREL3/MPP2/SYNGAP1/ZNF804A/INPP5J/MAP1A/EPHA4/PSEN1/ZMYND8/LZTS1/PREX1/RTN4R/SYNDIG1/NSF/GPER1/MAP2/CRIPT/SLC1A1/CNIH2/APP
GOBP_ENDOTHELIAL_CELL_DEVELOPMENT	GOBP_ENDOTHELIAL_CELL_DEVELOPMENT	66	0.364662	1.29719	0.027972	0.226838	0.194841	9334	tags=64%, list=50%, signal=32%	COL22A1/HAPLN2/TNF/HOXA13/ENG/GSTM3/S1PR2/HEG1/AFDN/COL18A1/CDH5/MARVELD2/GPX1/ZDHHC21/SOX18/CLDN3/PLCB1/COL15A1/CLIC4/FASN/CNMD/RAP1B/WNT7B/F2RL1/ARHGEF26/RAPGEF1/RAP2C/MYD88/IKBKB/VEGFA/MSN/VEZF1/ICAM1/S1PR3/CCM2/MYADM/PDE4D/ROCK2/RAPGEF3/PDE2A/STC1/TJP2
GOBP_ORGANELLE_FUSION	GOBP_ORGANELLE_FUSION	140	0.33029	1.24307	0.027972	0.226838	0.194841	11274	tags=67%, list=60%, signal=27%	STX1B/SNCA/PCDHGA3/TFRC/SPHK1/SAMD9/VPS18/GOSR2/TBC1D4/RUBCNL/VPS39/HUWE1/PID1/FIS1/MFN1/AFG3L2/GOSR1/CHCHD3/VPS11/STX16/VPS4A/USP30/CHMP3/CHP1/SNAP23/STX12/RCC1L/GNAI3/ANXA2/UVRAG/VAMP3/ZDHHC6/CALR/CAV2/SEC22B/RAB13/VTI1B/SYT4/SNAP29/BNIP1/TSNARE1/USO1/STX17/TAP2/DNM1L/ENO1/STX2/VCPIP1/PIKFYVE/SPG11/PRKN/ANKRD27/TRIM9/TAP1/ENO3/TMEM175/PRRT2/STOML2/GRIK5/VPS16/OMA1/RAB3A/SYT7/CORO1A/STX8/SYT9/VA…
GOBP_POSITIVE_REGULATION_OF_CELLULAR_PROTEIN_CATABOLIC_PROCESS	GOBP_POSITIVE_REGULATION_OF_CELLULAR_PROTEIN_CATABOLIC_PROCESS	148	0.326725	1.23419	0.027972	0.226838	0.194841	10910	tags=70%, list=59%, signal=29%	AGBL4/KCNE2/TRIB2/CDC20B/PLK1/PSMC1/BBS7/PTK2B/CCDC22/SIRT2/TAF1/SMURF1/TMTC3/LRP2/VPS11/PSEN1/DNAJB2/HECTD1/FAF1/PLK3/PRICKLE1/CSNK1E/SOCS4/RNF19A/HSPA1A/MAGEF1/ATXN3/TREM2/FAM122A/AURKA/PIAS1/FBXO22/VCP/ARIH1/PSMC4/AXIN1/PSMC2/NUPR1/SUMO2/RNF40/CTSC/RNF144A/NFE2L2/ANKIB1/UQCC2/TMEM259/LAPTM5/PRKN/TRIB1/APOE/DDRGK1/VPS35/RNF14/CLU/RAD23A/OSBPL7/HAMP/UBE2V2/BAG2/USP5/PSMC3/ELOB/MSN/CAV1/HERPUD1/H…
GOBP_POSITIVE_REGULATION_OF_PROTEOLYSIS_INVOLVED_IN_CELLULAR_PROTEIN_CATABOLIC_PROCESS	GOBP_POSITIVE_REGULATION_OF_PROTEOLYSIS_INVOLVED_IN_CELLULAR_PROTEIN_CATABOLIC_PROCESS	125	0.335724	1.25227	0.027972	0.226838	0.194841	10881	tags=72%, list=58%, signal=30%	AGBL4/KCNE2/TRIB2/CDC20B/PLK1/PSMC1/BBS7/PTK2B/CCDC22/SIRT2/TAF1/SMURF1/TMTC3/PSEN1/DNAJB2/HECTD1/PLK3/PRICKLE1/CSNK1E/SOCS4/RNF19A/HSPA1A/MAGEF1/ATXN3/TREM2/FAM122A/AURKA/PIAS1/FBXO22/VCP/ARIH1/PSMC4/AXIN1/PSMC2/NUPR1/SUMO2/RNF40/CTSC/RNF144A/NFE2L2/ANKIB1/TMEM259/LAPTM5/PRKN/TRIB1/DDRGK1/RNF14/CLU/RAD23A/OSBPL7/UBE2V2/BAG2/USP5/PSMC3/ELOB/CAV1/HERPUD1/HSPBP1/TRIB3/BAG6/USP13/HSPA1B/ECSCR/SGTA/C…
GOBP_REGULATION_OF_ADAPTIVE_IMMUNE_RESPONSE	GOBP_REGULATION_OF_ADAPTIVE_IMMUNE_RESPONSE	160	0.325514	1.23528	0.027972	0.226838	0.194841	8391	tags=48%, list=45%, signal=26%	FCER2/SLC22A13/NOD2/LTA/ADCY7/KLRC1/IL6/IL23A/CCR2/PRKCQ/NLRP3/TFRC/TNF/CD274/LILRB1/AZGP1/PRKCZ/BTK/HFE/ADA/KMT5C/EXOSC6/IL4R/AGER/CD226/ZBTB7B/MLH1/THOC1/RIF1/TNFRSF14/CD4/MSH2/RC3H2/PPP3CB/PYCARD/TRIM27/CEACAM1/IRF1/HLA-A/NFKBIZ/RIPK3/TP53BP1/FCGR2B/MALT1/PLA2G4A/CD1D/IRF7/TRPM4/IL6ST/RC3H1/TNFRSF1B/EIF2AK4/HLA-E/PTPN6/HLA-DRB1/HLA-F/CR1/HPX/HMCES/PTPRC/CCL19/FZD5/JAK3/HSPD1/IL18R1/RIPK2/CD48/…
GOBP_REGULATION_OF_CELLULAR_AMINO_ACID_METABOLIC_PROCESS	GOBP_REGULATION_OF_CELLULAR_AMINO_ACID_METABOLIC_PROCESS	61	0.373207	1.32156	0.027972	0.226838	0.194841	7775	tags=57%, list=42%, signal=34%	ACMSD/BHMT/ATCAY/PSMB10/PSMC1/SIRT4/PSMA6/PSME4/PSME2/OAZ2/PSMB3/PSME3/PSMC6/PARK7/OAZ1/PSMC4/PSMB8/PSMD13/PSMC2/ODC1/PSMD11/PSMD3/PSMB7/PSMA2/PSMB1/PSMB2/PSMB9/PSMD5/SLC7A7/PSMC5/PSMD1/PSMC3/AZIN1/PSMB6/PSMA7
GOBP_REGULATION_OF_MYELOID_CELL_DIFFERENTIATION	GOBP_REGULATION_OF_MYELOID_CELL_DIFFERENTIATION	220	0.312567	1.20311	0.027972	0.226838	0.194841	10765	tags=67%, list=58%, signal=29%	CARTPT/MPL/GPR55/IL23A/PRKCQ/ITGA2B/TNF/LILRB1/GPR68/TESC/TLR3/LRRC17/ZFP36L1/HOXA5/STAT5B/WDR61/RARA/LDB1/MAFB/PTK2B/INPP5D/P4HTM/CDK6/TNRC6B/TNRC6A/AGO1/NOTCH2/SCIN/TCTA/PRMT1/CD4/ARNT/BRD1/THPO/RNF41/CREB1/PAF1/HSPA1A/KMT2E/HAX1/HOXA7/EP300/RUNX1/TREM2/CEACAM1/GATA1/HMGB3/FOXP1/RBFOX2/KAT2B/EIF6/AGO3/CNOT4/IRF7/HMGB2/DLL1/PIAS3/CD74/MED1/GNAS/ZNF675/STAT1/HLA-DRB1/ETS1/CREBBP/MAPK14/C1QC/HDAC1…
GOBP_REGULATION_OF_VIRAL_LIFE_CYCLE	GOBP_REGULATION_OF_VIRAL_LIFE_CYCLE	135	0.334422	1.2546	0.027972	0.226838	0.194841	8818	tags=54%, list=47%, signal=29%	TRIM31/SLPI/TRIM34/TRIM6/PC/TNF/OAS1/IFIT1/APOBEC3C/TARBP2/RNASEL/TRIM22/PPARA/LGALS9/TRIM21/IFIT5/P4HB/MID2/ZC3HAV1/DDB1/ILF3/CD4/VPS4A/CHMP3/PLSCR1/TRIM26/LARP1/DDX3X/TRIM27/TSG101/CAV2/TRIM11/VPS37B/ISG20/PPIH/SNX3/SRPK1/CD74/APOBEC3A/PPIE/HLA-DRB1/PDE12/IFITM2/PML/NR5A2/LY6E/TRIM28/OAS2/SRPK2/PPID/FCN3/PKN2/HACD3/TRIM68/PABPC1/INPP5K/RAD23A/MPHOSPH8/PPIA/TMEM39A/EIF2AK2/PARP10/IFI16/STAU1/CD2…
GOBP_RESPIRATORY_SYSTEM_DEVELOPMENT	GOBP_RESPIRATORY_SYSTEM_DEVELOPMENT	184	0.320524	1.22565	0.027972	0.226838	0.194841	10956	tags=65%, list=59%, signal=27%	NKX2-8/GNG8/SFTPD/FGF9/ASCL1/MMP12/DNAAF1/EDN2/PHEX/TGFB3/DLG5/TNF/ALDH1A2/LAMA1/SHH/CELSR1/ABCA12/TCF21/MAPK3/FGF7/ADA/DISP1/PKD1/WT1/HSD11B1/HOXA5/PKDCC/SPEF2/LRP6/SPRY1/HEG1/LAMA5/ASXL1/IL13/YAP1/AIMP2/CCDC40/RC3H2/CREB1/TAB1/MME/SEC24B/EIF4EBP1/SPDEF/RPGRIP1L/EGFR/EP300/RCN3/TULP3/MAN1A2/NFIB/HIKESHI/SIX4/CRISPLD2/SOX9/AP3B1/KCNAB1/SLC23A1/KRAS/BMPR1A/SP3/LOX/WDPCP/WNT7B/ASS1/AARD/STRA6/ZFPM2…
GOBP_RESPONSE_TO_LIGHT_STIMULUS	GOBP_RESPONSE_TO_LIGHT_STIMULUS	303	0.299742	1.16814	0.027972	0.226838	0.194841	8912	tags=54%, list=48%, signal=29%	TH/AGRP/GRM6/CHRNB2/FOXB1/DBH/AANAT/PRPH2/DRD1/MMP1/RRH/GUCA1B/SERPINB13/KCNC2/DRD2/DCT/GRK1/PPEF1/ABCA7/PDC/GRIN1/CRB1/USP2/DUSP1/HOXA1/NMU/SYNGAP1/ST20/POLD1/NDRG4/KIT/UVSSA/CRTC1/MAPK10/NFATC4/POLH/DDB2/GNA11/TRPC3/CPT1B/GRK4/XPC/TANC1/OGG1/DTL/CDKN2D/MAP2K7/POLD3/PER2/GNGT2/ID2/BEST1/CDK5/TAF1/RDH13/RGS14/MAP3K4/RIC8A/CARD16/RAD18/NPHP1/DDB1/JUND/FBXL12/CDS1/TMEM161A/INO80/RHBDD1/MSH2/NEDD4/U…
GOBP_NECROTIC_CELL_DEATH	GOBP_NECROTIC_CELL_DEATH	54	0.383202	1.3377	0.028	0.226838	0.194841	8607	tags=59%, list=46%, signal=32%	SLC6A13/PYGL/TNF/NOL3/ZBP1/IRF3/TLR3/SLC25A4/SPATA2/CD14/ALKBH7/PPIF/RBCK1/RIPK3/LY96/NUPR1/DNM1L/FAS/MAP3K5/CASP8/TSPO/TMEM123/TICAM1/HEBP2/PGAM5/TRPM7/PELI1/TRAF2/TLR4/CAV1/MT-CO2/ARHGEF2
GOBP_NUCLEOSIDE_MONOPHOSPHATE_METABOLIC_PROCESS	GOBP_NUCLEOSIDE_MONOPHOSPHATE_METABOLIC_PROCESS	72	0.366102	1.30982	0.028	0.226838	0.194841	10099	tags=71%, list=54%, signal=33%	UPP2/UPB1/CMPK2/MPP1/XDH/AK1/TK2/NT5C/ADA/AK6/DHODH/TYMS/MAGI3/TK1/GART/IMPDH1/GMPS/NUDT2/DLG1/PAICS/IMPDH2/AK8/DGUOK/DNPH1/RFK/AK9/AMPD2/AK3/HPRT1/ENTPD8/PRPS2/AK5/RAD50/DLG2/APRT/CASK/ATIC/UPRT/DPYD/PRPS1/DCTD/CARD11/AMPD3/TJP2/NT5E/LHPP/DTYMK/UPP1/GMPR2/AK2/GUK1
GOBP_INTERLEUKIN_12_PRODUCTION	GOBP_INTERLEUKIN_12_PRODUCTION	59	0.375414	1.32361	0.028028	0.226838	0.194841	8223	tags=53%, list=44%, signal=29%	NOD2/IL23A/IRF5/IRF8/LILRB1/LILRA5/CLEC7A/TLR3/TIRAP/LGALS9/AGER/CD36/TLR2/IRAK3/SYK/PIBF1/IRF1/FOXP1/TIGIT/PLCB1/MAPK14/LAPTM5/RELA/CCL19/JAK3/HSPD1/RIPK2/IDO1/NFKB1/TLR4/LTB
GOBP_ORGANELLE_MEMBRANE_FUSION	GOBP_ORGANELLE_MEMBRANE_FUSION	105	0.348459	1.28284	0.0280866	0.226838	0.194841	11274	tags=70%, list=60%, signal=28%	STX1B/SNCA/SPHK1/SAMD9/VPS18/GOSR2/TBC1D4/RUBCNL/VPS39/MFN1/GOSR1/VPS11/STX16/VPS4A/CHMP3/CHP1/SNAP23/STX12/RCC1L/GNAI3/ANXA2/UVRAG/VAMP3/CALR/CAV2/SEC22B/RAB13/VTI1B/SYT4/SNAP29/BNIP1/TSNARE1/USO1/STX17/TAP2/STX2/VCPIP1/PIKFYVE/SPG11/ANKRD27/TRIM9/TAP1/TMEM175/PRRT2/GRIK5/RAB3A/SYT7/CORO1A/STX8/SYT9/VAMP7/RAB7B/DYSF/STX11/VAMP2/STXBP6/TAPBP/CPLX2/RAB8B/CHMP2B/RAB7A/SOX30/VPS41/SYT13/VPS8/SYT11/S…
GOBP_PROTEIN_AUTOUBIQUITINATION	GOBP_PROTEIN_AUTOUBIQUITINATION	69	0.36841	1.31381	0.0280866	0.226838	0.194841	10689	tags=68%, list=57%, signal=29%	TRIM71/RNF133/BRCA1/DDB2/RNF183/TRIM21/TAF1/RAD18/AMFR/UBE2A/RNF41/RNF10/BFAR/SASH1/CNOT4/SH3RF3/ASB4/RNF13/RNF141/MTA1/CUL3/UHRF2/UBE2B/SH3RF1/UBE2D3/PRKN/TRIM68/UBE3D/RNF146/RNF11/NFX1/TRAF2/LTN1/RNF208/UHRF1/STUB1/LRRK2/KLHL24/RNF187/LRSAM1/SH3RF2/RNF19B/RNF8/RNF4/MDM2/TRIM17/DTX3L
GOBP_REGULATION_OF_NEURON_PROJECTION_DEVELOPMENT	GOBP_REGULATION_OF_NEURON_PROJECTION_DEVELOPMENT	411	0.293146	1.15451	0.0280866	0.226838	0.194841	10707	tags=60%, list=57%, signal=26%	CHRNB2/DRAXIN/ITPKA/GRID2/FRMD7/STX1B/RTN4RL1/ADGRB3/NGEF/KNDC1/S100A9/CHRNA3/CHODL/MCF2/NTN1/TRPV4/NTRK3/CAMK1/ZDHHC15/LINGO1/PLXNA3/MBOAT1/ISLR2/SYNGAP1/LZTS3/ZNF804A/ALKAL2/IL1RAPL1/FUT9/NDRG4/PAK1/CRTC1/CRMP1/LRP8/SEMA4F/NFATC4/PARP6/TIAM1/RETREG3/MFSD2A/INPP5J/BMP7/BHLHB9/CAMK2G/ACAP3/EPHA4/EPHA7/EPO/IST1/RTN4RL2/COBL/SEMA3B/SEMA3F/TSC1/ARC/ATP1B2/SEMA4B/CBFA2T2/CDH2/DGKG/PTK2B/ID1/CNR1/CDK5…
GOBP_REGULATION_OF_DOUBLE_STRAND_BREAK_REPAIR_VIA_HOMOLOGOUS_RECOMBINATION	GOBP_REGULATION_OF_DOUBLE_STRAND_BREAK_REPAIR_VIA_HOMOLOGOUS_RECOMBINATION	41	0.405905	1.3715	0.0281407	0.226999	0.19498	5189	tags=44%, list=28%, signal=32%	RTEL1/RECQL5/HELB/UBQLN4/FIGNL1/KLHL15/MMS19/PARPBP/RIF1/ZNF365/PPP4R2/PPP4C/MAGEF1/SETD2/TERF2IP/TP53BP1/FUS/CHEK1
GOBP_REGULATION_OF_CHOLESTEROL_EFFLUX	GOBP_REGULATION_OF_CHOLESTEROL_EFFLUX	31	0.426025	1.38778	0.0283688	0.227862	0.195721	6982	tags=55%, list=37%, signal=34%	PLA2G10/ABCA7/SHH/CES1/CETP/ABCA1/ABCA12/PTCH1/SREBF2/NAXE/NR1H2/EEPD1/LAMTOR1/ABCA8/APOE/TTC39B/NFKBIA
GOBP_ETHANOL_OXIDATION	GOBP_ETHANOL_OXIDATION	12	0.563362	1.51749	0.0283766	0.227862	0.195721	3160	tags=50%, list=17%, signal=42%	ADH1A/ADH4/ADH6/ACSS2/ADH1C/ACSS1
GOBP_THALAMUS_DEVELOPMENT	GOBP_THALAMUS_DEVELOPMENT	12	0.56349	1.51783	0.0283766	0.227862	0.195721	3806	tags=50%, list=20%, signal=40%	CHRNB2/FOXB1/SHH/SRD5A1/LRP6/UQCRQ
GOBP_CELL_SUBSTRATE_ADHESION	GOBP_CELL_SUBSTRATE_ADHESION	348	0.300782	1.17884	0.028387	0.227862	0.195721	9277	tags=52%, list=50%, signal=26%	NPY2R/CEACAM6/OLFM4/MUC4/MSLN/HOXD3/MMP12/ACER2/AJAP1/ITGA2/CDKN2A/ITGA2B/COL17A1/TNN/RELL2/ITGA10/TMEM8B/GCNT2/CARMIL1/EPHA1/BCAS3/ARHGAP6/TIAM1/PRKCZ/AJUBA/TESK2/ITGAL/CCL25/JAM3/DLC1/ADAM9/EGFLAM/SGCE/PKD1/TEK/TSC1/MINK1/ATRN/AKIP1/LDB1/TRIOBP/ATP1B2/PTK2B/CD36/ID1/CDK5/P4HB/FER/PDGFB/SPOCK2/CDK6/CLASP2/RASA1/DUSP3/ATRNL1/SDC4/LAMA5/CRKL/TESK1/PTPRA/ARL2/NF2/RAC2/EMILIN1/TACSTD2/TTYH1/MICALL2/…
GOBP_NEGATIVE_REGULATION_OF_CELL_KILLING	GOBP_NEGATIVE_REGULATION_OF_CELL_KILLING	26	0.454219	1.43378	0.0286006	0.227862	0.195721	6673	tags=54%, list=36%, signal=35%	KLRC1/LILRB1/LGALS9/IL13/PPP3CB/HSP90AB1/CEACAM1/HLA-A/FCGR2B/HLA-E/HLA-F/MICA/PTPRC/CRK
GOBP_B_CELL_ACTIVATION	GOBP_B_CELL_ACTIVATION	236	0.311857	1.20486	0.0286874	0.227862	0.195721	8938	tags=54%, list=48%, signal=29%	CXCR5/CHRNB2/CR2/TNFRSF13C/NOD2/CD19/IL6/MS4A1/NHEJ1/TFRC/MZB1/MNDA/SLC39A10/TCIRG1/RASGRP1/PIK3CD/ZAP70/KIT/BTK/CTLA4/DCLRE1C/BLNK/ADA/KMT5C/ZFP36L1/RNF168/STAT5B/TIRAP/CDH17/EXOSC6/FNIP1/PTK2B/MLH1/ADAM17/TNFRSF4/INPP5D/PPP2R3C/THOC1/PLCG2/NOTCH2/RIF1/HDAC4/HDAC5/IL11/IL13/TXLNA/SYK/GAPT/MSH2/SWAP70/CD70/ERCC1/EP300/HMGB3/TP53BP1/SH3KBP1/YY1/FCGR2B/MALT1/NFATC2/DLL1/CEBPG/RC3H1/CD74/PTPN6/PRKCD…
GOBP_B_CELL_ACTIVATION_INVOLVED_IN_IMMUNE_RESPONSE	GOBP_B_CELL_ACTIVATION_INVOLVED_IN_IMMUNE_RESPONSE	73	0.371345	1.32927	0.0286874	0.227862	0.195721	8823	tags=59%, list=47%, signal=31%	CD19/IL6/TFRC/ADA/KMT5C/RNF168/CDH17/EXOSC6/PTK2B/MLH1/THOC1/PLCG2/NOTCH2/RIF1/GAPT/MSH2/SWAP70/ERCC1/TP53BP1/FCGR2B/DLL1/CR1/ST3GAL1/HMCES/GPR183/PTPRC/ITM2A/NBN/BATF/HSPD1/BCL6/LIG4/BCL3/DOCK10/EXOSC3/TLR4/PAXIP1/LGALS1/ITFG2/DOCK11/POU2AF1/NKX2-3/PLCL2
GOBP_NEGATIVE_REGULATION_OF_RESPONSE_TO_WOUNDING	GOBP_NEGATIVE_REGULATION_OF_RESPONSE_TO_WOUNDING	82	0.359083	1.29973	0.0286874	0.227862	0.195721	8032	tags=52%, list=43%, signal=30%	CLDN19/RTN4RL1/AJAP1/ADTRP/TSPAN8/TNF/CD109/SLC12A2/EPHA4/SH2B3/PLAT/C1QTNF1/NOS3/SERPINE2/PDGFB/CLASP2/PRKG1/INPP5F/CEACAM1/EPPK1/RTN4R/USF1/PLAUR/CLDN3/PRKCD/FAP/SERPINF2/SERPINE1/GJA1/LRIG2/APOE/CRK/GIT1/CD34/CPB2/SIGLEC10/RGMA/CASK/KRT1/ALOX5/FGF2/CLASP1/F12
GOBP_REGULATION_OF_ATP_METABOLIC_PROCESS	GOBP_REGULATION_OF_ATP_METABOLIC_PROCESS	109	0.348296	1.28489	0.0286874	0.227862	0.195721	9315	tags=59%, list=50%, signal=30%	GPD1/SNCA/ZBTB20/POM121/NUP210/PPARA/DDIT4/PGAM1/PID1/PRKAA2/SLC25A12/FIS1/NUP133/PSEN1/NUP62/HDAC4/FBP1/ARNT/PPIF/OGT/TPR/COX7A1/JMJD8/EP300/P2RX7/TREM2/SHMT2/NUP50/EIF6/VCP/NUP214/NUPR1/NUP37/PDE12/DNM1L/ENO1/NDC1/SEH1L/TMSB4X/NUP188/COX7A2L/NUP35/UQCC2/PRKAG2/TSPO/MLXIPL/TIGAR/IGF1/GIT1/GCKR/DNAJC30/APP/NUP107/BEND3/RAE1/NUP54/SPHK2/MT-CO2/IFNG/NUP85/PRKAG1/PPARGC1A/AAAS/HIF1A
GOBP_REGULATION_OF_CELL_MORPHOGENESIS	GOBP_REGULATION_OF_CELL_MORPHOGENESIS	298	0.302342	1.1776	0.0286874	0.227862	0.195721	8906	tags=51%, list=48%, signal=27%	OLFM4/ITPKA/MPL/SYT2/ERMN/ARHGEF18/DLG4/PLXNA3/IL1RAPL1/KIT/CARMIL1/LRP8/SYT17/PARP6/TIAM1/MFSD2A/BAIAP2/BHLHB9/COCH/RHOH/FGD2/CCL24/EPHA4/RHOB/DLC1/CPNE6/RHOBTB1/CDC42EP1/CFDP1/ARC/TRIOBP/PTK2B/P4HB/SMURF1/SEMA4D/RASA1/BRWD3/PLXND1/ATP10A/CRKL/TESK1/CSF1R/RHOC/SLC23A2/FYN/LARP4/SS18L1/CAPZB/RAC2/TACSTD2/CCL2/FZD4/CUX1/PREX1/EEF2K/ITGB1BP1/CUX2/FMNL2/DVL2/CALR/NTNG2/PARVB/FMNL1/ZMYM4/ZMYM6/ITGA7/…
GOBP_MITOCHONDRIAL_DNA_REPLICATION	GOBP_MITOCHONDRIAL_DNA_REPLICATION	12	-0.422008	-1.63957	0.0287409	0.227862	0.195721	10781	tags=100%, list=58%, signal=42%	STOML2/PRIMPOL/LIG3/SSBP1/MGME1/DNAJA3/ATG7/TWNK/METTL4/POLG2/DNA2
GOBP_NUCLEOTIDE_EXCISION_REPAIR_DNA_INCISION	GOBP_NUCLEOTIDE_EXCISION_REPAIR_DNA_INCISION	39	0.418706	1.40566	0.0289185	0.227862	0.195721	9016	tags=62%, list=48%, signal=32%	POLD1/DDB2/OGG1/POLD3/POLD2/GTF2H3/RFC1/DDB1/RFC3/ERCC4/ERCC1/ERCC2/GTF2H5/UBA52/NTHL1/POLD4/GTF2H4/RPA3/GTF2H2/RPA1/POLK/FAN1/UBB/RPA2
GOBP_ANATOMICAL_STRUCTURE_HOMEOSTASIS	GOBP_ANATOMICAL_STRUCTURE_HOMEOSTASIS	433	0.289994	1.14374	0.028971	0.227862	0.195721	10997	tags=64%, list=59%, signal=27%	HTR1B/POTEF/ZSCAN4/HUS1B/POTEJ/CARTPT/RP1L1/SFTPD/MUC4/GPR55/NOD2/KLHL10/NXNL2/VSIG1/PIGR/IL6/P2RX1/CRB1/PRKCQ/SCGN/BBS2/GNL3L/PRIM2/TFRC/ILDR2/RTEL1/TCIRG1/HOXA13/SMG6/POLD1/ACP5/BBS1/ACD/GCNT2/ADRB2/DEF8/PRR4/ABCA12/CCNE1/CALB2/AZGP1/TFIP11/MAPK3/MFSD2A/POLE/TNKS1BP1/POLA2/SLC12A2/NANOS1/DCLRE1C/MAP1A/MTM1/USH1G/ZBTB48/JAM3/SP100/TP53INP2/DCTN1/MAP2K7/POLD3/TEN1/MDM1/NOS3/LDB1/POLD2/ATP1B2/PTK2…
GOBP_AXO_DENDRITIC_TRANSPORT	GOBP_AXO_DENDRITIC_TRANSPORT	69	0.366722	1.30779	0.028971	0.227862	0.195721	10746	tags=75%, list=58%, signal=32%	HAP1/AGBL4/TMEM108/MAP1A/KIF5C/RAB27B/AP3M2/AP3D1/DYNC1H1/TERF2/KIF5A/AP3S2/BLOC1S6/DST/MAPT/AP3M1/ACTR10/SYBU/RAB21/APBA1/AP3B1/MAP2/SPG11/KIF1A/AP3B2/SOD1/KIF17/WASF1/HNRNPU/DLG2/AP3S1/KIF1B/ARL8B/CNIH2/FBXW11/KIF1C/APP/BLOC1S1/NEFL/BORCS5/KIF3B/HIF1A/PURA/MAPK8IP3/BLOC1S4/PAFAH1B1/KIF4A/KLC3/SFPQ/DTNBP1/HSPB1/ARL8A
GOBP_EXTRINSIC_APOPTOTIC_SIGNALING_PATHWAY	GOBP_EXTRINSIC_APOPTOTIC_SIGNALING_PATHWAY	211	0.311211	1.19563	0.028971	0.227862	0.195721	11097	tags=68%, list=60%, signal=28%	IL1A/DBH/DDX47/TNFSF10/BRCA1/TNF/NOL3/MLLT11/CRADD/ACVR1/TMC8/TLR3/WWOX/G0S2/SP100/BCL2L14/PARP2/NOS3/IL6R/MAPK7/EYA3/CTNNA1/FAF1/BCL2L2/SGPP1/FYN/IFI27/YAP1/SIAH2/RNF41/RBCK1/PSME3/CD70/HSPA1A/GPX1/DDX3X/PYCARD/P2RX7/GATA1/KRT8/ZC3HC1/RNF34/HTRA2/PHIP/FAIM/PARK7/HMGB2/FAIM2/TNFRSF1B/CASP8AP2/CASP2/IFI6/JAK2/EYA2/TNFRSF10A/FAS/TGFB2/PDIA3/PML/GPER1/TNFSF12/MCL1/CASP8/TCF7L2/RB1CC1/TNFRSF12A/NGF/S…
GOBP_POSITIVE_REGULATION_OF_STRESS_ACTIVATED_PROTEIN_KINASE_SIGNALING_CASCADE	GOBP_POSITIVE_REGULATION_OF_STRESS_ACTIVATED_PROTEIN_KINASE_SIGNALING_CASCADE	113	0.340842	1.26166	0.028971	0.227862	0.195721	8072	tags=55%, list=43%, signal=31%	NOD2/EDA2R/RELL1/RELL2/TNF/SPHK1/RASGRP1/XDH/CLEC7A/TLR3/MAP3K3/TIRAP/MINK1/AGER/PTK2B/MAP3K4/MAPK8IP1/PDCD10/TAOK3/PRMT1/HIPK2/PYCARD/ANKRD6/DUSP19/MAP3K10/FCGR2B/CCL21/SASH1/GADD45A/AXIN1/SH3RF3/PLCB1/RNF13/TRAF4/DUSP15/TGFB2/MAP3K5/SPI1/MTURN/RASSF2/SDCBP/MFHAS1/RB1CC1/SH3RF1/LYN/PJA2/SERPINF2/CCL19/WNT7B/F2RL1/RIPK2/KLHDC10/TRAF2/MYD88/TAOK2/EIF2AK2/APP/NOD1/TLR4/VEGFA/STK3/CD27
GOBP_PROTEIN_LOCALIZATION_TO_ENDOPLASMIC_RETICULUM	GOBP_PROTEIN_LOCALIZATION_TO_ENDOPLASMIC_RETICULUM	140	0.328613	1.23675	0.028971	0.227862	0.195721	10715	tags=69%, list=57%, signal=30%	ANK2/INSIG1/INSIG2/TRAM2/SEC61A2/GBF1/RPL21/SEC61G/SPCS3/TRAM1L1/RPS10/SEC61A1/SRP54/MAN1A1/RPS12/KDELR2/RPL3/SRPRB/RPS27/RAB3GAP2/RER1/SPCS1/BCAP29/UBA52/RPS9/RPS28/SEC61B/RPL23A/RPL31/RPS23/RPS19/RPL37A/RPS3/RPS15A/RPL18/RPL11/RPL28/RPL5/RPL32/SGTB/RPS8/RPS24/RPS18/RPL26/RPS4Y1/RPS25/RPL14/RPL24/RPLP1/EDEM1/RPL27A/RPL10/RPS6/RAB10/RPS15/SEC63/RPSA/GJA1/RPS20/RPL36/RPS11/DDRGK1/RPS16/RPLP0/RYR2/…
GOBP_REGULATION_OF_ACTOMYOSIN_STRUCTURE_ORGANIZATION	GOBP_REGULATION_OF_ACTOMYOSIN_STRUCTURE_ORGANIZATION	92	0.349197	1.27536	0.028971	0.227862	0.195721	9557	tags=53%, list=51%, signal=26%	SYNPO2L/FRMD7/ARHGEF18/TGFB3/CGNL1/PAK1/CARMIL1/EPHA1/ARHGAP6/FHOD1/DLC1/ARHGEF10/TSC1/ECT2/AKAP13/CLASP2/CCDC88A/SDC4/TESK1/RHOC/NF2/TACSTD2/ITGB1BP1/RAC1/NRP1/STMN1/ALMS1/ARHGAP28/SERPINF2/PPM1F/INPP5K/PAK2/TGFBR1/LIMCH1/SMAD4/S100A10/PPP1R9A/PFN2/CLASP1/S1PR1/WASF2/ROCK2/RAPGEF3/ARHGEF10L/SFRP1/CDC42/ASAP3/TMEFF2/LIMK1
GOBP_REGULATION_OF_CHROMOSOME_SEPARATION	GOBP_REGULATION_OF_CHROMOSOME_SEPARATION	68	0.367	1.30757	0.028971	0.227862	0.195721	8033	tags=54%, list=43%, signal=31%	TEX14/DUSP1/USP44/PLK1/CDT1/HECW2/ANAPC1/ZWINT/CDC26/TACC3/NUMA1/RIOK2/ANAPC11/LCMT1/PLSCR1/TPR/IK/CDC6/AURKB/PSMG2/CSNK2A1/CENPF/MAD1L1/CDC23/CUL3/ANAPC15/RB1/ATM/TTK/CDC16/KLHL22/NSMCE2/BUB3/APC/MAD2L1/GEN1/SPDL1
GOCC_CILIARY_PLASM	GOCC_CILIARY_PLASM	118	0.338056	1.25613	0.028971	0.227862	0.195721	6931	tags=45%, list=37%, signal=28%	TUBB4A/DNAI2/SAXO1/RP1L1/DNAAF1/DNAH10/DRC1/DNAH6/DNAH2/RSPH9/CFAP221/DNAH5/BBS1/DNHD1/SPEF1/TTLL3/ARFGEF2/CCDC113/BBS7/DCDC2/DNAH1/ATG16L1/CCDC96/DYNC2H1/IFT57/CCDC40/ARL6/BBS5/RPGRIP1L/AMBRA1/TULP3/MAP4/CEP162/CENPF/TTC30A/CCDC65/DNALI1/INPP5E/AK8/CFAP36/MNS1/SPATA7/EFHC2/ARMC4/CCSAP/GABARAP/WDPCP/DNAH14/DNAL1/RSPH4A/MAK/KIF17/NME8
GOBP_POSITIVE_REGULATION_OF_T_CELL_MIGRATION	GOBP_POSITIVE_REGULATION_OF_T_CELL_MIGRATION	30	0.440322	1.42272	0.0289953	0.227862	0.195721	7582	tags=63%, list=41%, signal=38%	S100A7/CCR2/CD99L2/ADAM17/CXCL12/OXSR1/TNFRSF14/WNK1/ADAM10/PYCARD/CCL21/CXCL13/SELENOK/CCL20/DOCK8/STK39/CXCL10/XCL2/APP
GOCC_STEREOCILIUM_BUNDLE	GOCC_STEREOCILIUM_BUNDLE	58	0.377594	1.32859	0.029	0.227862	0.195721	7566	tags=57%, list=41%, signal=34%	TSPEAR/MYO3A/TMC2/ESPNL/ESPN/BBS2/RSPH9/MPP1/RIPOR2/CALB2/PLS1/EPS8L2/MYO15A/KPTN/TRIOBP/DCDC2/DOCK4/GRXCR2/RHOC/WHRN/MYO1C/CIB2/FCHSD2/ATP8B1/PVALB/VEZT/SLC4A7/STRC/CDC14A/TPRN/IFT20/CALB1/IDO1
GOBP_COLLAGEN_FIBRIL_ORGANIZATION	GOBP_COLLAGEN_FIBRIL_ORGANIZATION	52	0.384194	1.33266	0.0290581	0.22801	0.195848	7290	tags=48%, list=39%, signal=29%	OPTC/FOXC2/DPT/CYP1B1/DDR2/PXDN/COL12A1/EMILIN1/P3H4/SERPINH1/COLGALT1/COL14A1/COL5A3/COL1A1/TGFB2/COL1A2/CHADL/RB1/SERPINF2/LOX/COL13A1/TGFBR1/AEBP1/EXT1/ADAMTS2
GOMF_LIGASE_ACTIVITY_FORMING_CARBON_NITROGEN_BONDS	GOMF_LIGASE_ACTIVITY_FORMING_CARBON_NITROGEN_BONDS	45	0.398033	1.35867	0.0290873	0.22801	0.195848	8099	tags=60%, list=43%, signal=34%	TTLL13P/TPGS1/MTHFS/TTLL6/TTLL1/TTLL11/TTLL3/TTLL7/CTPS2/MCCC1/TTLL5/GCLC/GART/GSS/PPCS/GMPS/PAICS/GLUL/TTL/MTHFD1L/ASS1/GCLM/DPH6/QRSL1/GATC/CPS1/HLCS
GOBP_NEGATIVE_REGULATION_OF_CENTROSOME_DUPLICATION	GOBP_NEGATIVE_REGULATION_OF_CENTROSOME_DUPLICATION	11	0.570871	1.50638	0.0291807	0.228205	0.196016	7216	tags=73%, list=39%, signal=45%	BRCA1/MDM1/KAT2A/KAT2B/NPM1/CCNF/TMEM67/RBM14
GOMF_FILAMIN_BINDING	GOMF_FILAMIN_BINDING	11	0.56901	1.50147	0.0291807	0.228205	0.196016	6592	tags=82%, list=35%, signal=53%	RFLNA/CRMP1/NEBL/DPYSL4/MICALL2/CEACAM1/SYNPO2/RFLNB/TMEM67
GOBP_ANTIGEN_RECEPTOR_MEDIATED_SIGNALING_PATHWAY	GOBP_ANTIGEN_RECEPTOR_MEDIATED_SIGNALING_PATHWAY	235	0.310073	1.19786	0.0292882	0.228777	0.196507	9061	tags=54%, list=49%, signal=28%	BTN1A1/CD19/PAX5/GCSAML/LAT/MS4A1/PRKCQ/BTNL9/BMX/CD3G/MNDA/SLC39A10/PAK1/PIK3CD/ZAP70/HHLA2/TXK/BTK/CTLA4/BLNK/BTN2A1/ADA/PSMB10/PSMC1/SH2B2/CD226/DGKZ/INPP5D/PRKD2/BTN3A3/PLCG2/DUSP3/PSEN1/PSMA6/CRKL/PSME4/FYN/CD4/PSME2/WNK1/SYK/CD3D/RNF31/PSMB3/RC3H2/RBCK1/PSME3/CBLB/SKP1/RUNX1/CEACAM1/PSMC6/HLA-A/NFKBIZ/FOXP1/FCGR2B/MALT1/PHPT1/LCK/NFATC2/PSMC4/HLA-DQA1/PSMB8/RC3H1/THEMIS/PSMD13/PSMC2/PTPN6/E…
GOBP_ACTIVATION_OF_NF_KAPPAB_INDUCING_KINASE_ACTIVITY	GOBP_ACTIVATION_OF_NF_KAPPAB_INDUCING_KINASE_ACTIVITY	18	0.505339	1.48288	0.0294118	0.229205	0.196875	8244	tags=67%, list=44%, signal=37%	CARD10/TLR3/TIRAP/TNFSF15/IRAK1/MALT1/TRAF4/TNFRSF10A/MAS1/TRAF2/CARD14/TLR6
GOBP_MISMATCH_REPAIR	GOBP_MISMATCH_REPAIR	33	0.424807	1.39405	0.0294118	0.229205	0.196875	9016	tags=73%, list=48%, signal=38%	AXIN2/POLD1/HDAC10/PMS2/MSH5/RNASEH2A/XPC/POLD3/POLD2/MLH1/MLH3/MSH3/MSH2/ERCC1/SETD2/PMS1/POLD4/RPA3/MCM9/RPA1/TP73/LIG1/PRKCG/RPA2
GOBP_ANGIOGENESIS_INVOLVED_IN_WOUND_HEALING	GOBP_ANGIOGENESIS_INVOLVED_IN_WOUND_HEALING	24	0.4588	1.42422	0.0298661	0.230253	0.197775	9348	tags=67%, list=50%, signal=33%	FOXC2/TNF/SLC12A2/GPX1/PRCP/ETS1/B4GALT1/MCAM/SERPINE1/SMOC2/CD34/SRF/ALOX5/VEGFA/ITGB3/GATA2
GOBP_ACTIVATION_OF_PROTEIN_KINASE_ACTIVITY	GOBP_ACTIVATION_OF_PROTEIN_KINASE_ACTIVITY	322	0.299836	1.17082	0.0298889	0.230253	0.197775	9148	tags=54%, list=49%, signal=28%	GRM4/ERN2/NRG1/CARTPT/CHRNA7/DRD4/NOD2/GNG3/CHRNA3/DRD2/ADCY7/TDGF1/IL23A/ADRA2B/GPRC5C/AVPI1/NTRK3/DBF4B/TGFB3/PRKAR1B/TNF/KSR1/CARD10/PAK1/KIT/ADRB2/MAPK10/PRKCZ/TGFA/MAPK3/ARAF/TLR3/EPO/ADAM9/MAP3K3/UBE2V1/ADCY4/MAP2K7/TIRAP/TNFSF15/MINK1/PTK2B/ARRB1/IL6R/PDGFB/PPP2R3C/ECT2/MAP3K4/CCDC88A/PSEN1/SHC1/S1PR2/CRKL/PAK4/TAOK3/TAB3/SHC2/WNK1/SYK/GPRC5A/MAP4K5/IRAK1/ERN1/TAB1/ITGB1BP1/EGFR/LPAR3/PIBF…
GOBP_VESICLE_TARGETING_TO_FROM_OR_WITHIN_GOLGI	GOBP_VESICLE_TARGETING_TO_FROM_OR_WITHIN_GOLGI	73	0.370113	1.32486	0.0298889	0.230253	0.197775	8373	tags=59%, list=45%, signal=33%	GRIA1/TRAPPC5/CEP19/GOSR2/TGFA/TRAPPC2/GBF1/GORASP1/PPP6R1/TMED10/GOSR1/TRAPPC6A/PEF1/F8/LMAN1/SEC24B/TRAPPC9/SEC22B/TRAPPC4/GOLGA2/PPP6C/PDCD6/SCFD1/USO1/AP1AR/NSF/TBC1D20/SEC23A/CTSC/CUL3/ANKRD28/SEC23IP/SEC24D/PPP6R3/F5/CNIH2/COL7A1/SAR1A/ARFGAP3/CD59/SEC16A/TRAPPC3/SEC24A
GOBP_ANTIGEN_PROCESSING_AND_PRESENTATION	GOBP_ANTIGEN_PROCESSING_AND_PRESENTATION	227	0.308814	1.18981	0.02997	0.230253	0.197775	10475	tags=62%, list=56%, signal=27%	NOD2/CD207/LAG3/ERAP2/RILP/AZGP1/HFE/LGMN/PSMB10/NCF2/PSMC1/DCTN1/AP1M1/AP2A2/AP1S1/DYNC1I1/AP1B1/RAB35/HLA-C/CD36/RAB32/AP3D1/LNPEP/DYNC1H1/AP2B1/CLTC/PSMA6/KIF5A/PSME4/PSME2/CAPZB/PSMB3/AP2M1/SNAP23/MFSD6/PSME3/FCGR1B/SEC24B/ERAP1/VAMP3/ACTR10/PYCARD/TREM2/CALR/AP2S1/PSMC6/HLA-A/FCER1G/SEC22B/FCGR2B/CCL21/CD1D/PSMC4/HLA-DQA1/PSMB8/KIF22/RAB4A/CD74/HLA-E/CANX/PSMD13/PSMC2/AP1M2/SH3GL2/HLA-DRB1/T…
GOBP_CELLULAR_PROTEIN_COMPLEX_DISASSEMBLY	GOBP_CELLULAR_PROTEIN_COMPLEX_DISASSEMBLY	216	0.311181	1.19705	0.02997	0.230253	0.197775	11290	tags=69%, list=61%, signal=28%	TRIM54/TRPV4/SLN/APC2/MRPS24/PLEKHH2/CARMIL1/MRPL38/SPEF1/KIF24/MAP1A/ADD3/N6AMT1/NES/MRPL11/TRIOBP/FLII/SVIL/MRPS31/CLASP2/AURKAIP1/UPF1/MRPL21/SCIN/MRPL46/MRPL49/MID1IP1/MRPS7/SH3GL1/CAPZB/MRPS12/CFL2/LMOD1/VPS4A/MRPS27/MAP1B/SWAP70/MRPS18B/PTCD3/MTPN/MRPS21/MRPL48/MRPS17/CAPG/SYNJ1/EIF5A/MRRF/MRPL17/MRPL51/SPTBN5/TMOD1/MRPS35/STMN1/TWF1/PLEK/MRPS22/MRPS15/MRPL18/MRPS9/NSF/MRPL13/MRPS28/MRPL58/…
GOBP_ESTABLISHMENT_OF_CELL_POLARITY	GOBP_ESTABLISHMENT_OF_CELL_POLARITY	135	0.332587	1.24772	0.02997	0.230253	0.197775	11102	tags=68%, list=60%, signal=28%	CRB1/LAMA1/TCIRG1/SHH/CYP26B1/PAK1/RIPOR2/PLK1/BCAS3/PRKCZ/FSCN1/FBF1/JAM3/PKD1/DCTN1/GBF1/RAB11FIP2/PTK2B/GPSM2/SPRY1/NUMA1/SNX27/CRKL/CDH5/MAP1B/RNF41/CENPA/KRIT1/HSP90AB1/FAM89B/CCL21/MYH9/MAP4/UST/PRKCI/RICTOR/CYTH3/DOCK8/GOLPH3/RAB10/SIPA1L3/RAP1B/GJA1/CCL19/NDE1/WDPCP/CRK/MYO18A/KIF20B/AMOT/IFT20/ARHGEF11/PARD3/HES1/LLGL2/FBXW11/KANK1/HES5/MAD2L1/FGF13/CLASP1/KIF25/SPDL1/PTK7/MSN/PKHD1/FERM…
GOBP_JNK_CASCADE	GOBP_JNK_CASCADE	187	0.317262	1.21251	0.02997	0.230253	0.197775	11000	tags=67%, list=59%, signal=28%	SERPINB3/ERN2/NOD2/EDA2R/KLHL31/TNF/GRIK2/RASGRP1/NPPA/MAPK10/TLR3/UBE2V1/MAP2K7/TIRAP/MINK1/MECOM/HDAC3/AGER/PTK2B/MAPK8IP1/DUSP3/GPS1/MAGI3/CRKL/TAOK3/TAB3/SYK/MAP4K5/MEN1/IRAK1/ERN1/TAB1/HIPK2/EGFR/PYCARD/ANKRD6/DUSP19/MAP3K10/PTPN1/FCGR2B/CCL21/MAP2K4/MDFIC/MAP4K4/GADD45A/HIPK3/AXIN1/SH3RF3/ZNF675/UBA52/IRAK2/PLCB1/TRAF4/DUSP15/MAP3K5/RAP2A/MTURN/RASSF2/SDCBP/MFHAS1/RB1CC1/MAP3K2/SH3RF1/PJA2/…
GOBP_MITOTIC_DNA_INTEGRITY_CHECKPOINT	GOBP_MITOTIC_DNA_INTEGRITY_CHECKPOINT	105	0.344279	1.26745	0.02997	0.230253	0.197775	10589	tags=65%, list=57%, signal=28%	HUS1B/MUC1/ORC1/CNOT1/RAD9A/CRADD/TNKS1BP1/ARID3A/BTG2/XPC/E2F4/NAE1/CARM1/SYF2/CDC25C/ZNF385A/EME2/TRIM39/PPP1R10/TAOK3/PRMT1/PLK3/MDM4/MSH2/CDC6/EP300/CNOT6/AURKA/STK33/CNOT6L/CNOT4/GADD45A/CASP2/FOXO4/PML/PCBP4/RPL26/ZNF830/CDKN1A/CNOT3/NEK11/ATM/FBXO31/NBN/CNOT11/CHEK2/E2F1/PRKDC/RAD17/TAOK2/TRIAP1/CCND1/RAD9B/RPA2/RBL2/CNOT8/HMGA2/GTSE1/SOX4/HUS1/RINT1/PCNA/CLSPN/CDK1/TAOK1/MDM2/TICRR/EME1
GOBP_POSITIVE_REGULATION_OF_MAP_KINASE_ACTIVITY	GOBP_POSITIVE_REGULATION_OF_MAP_KINASE_ACTIVITY	226	0.310053	1.19432	0.02997	0.230253	0.197775	9278	tags=56%, list=50%, signal=29%	GRM4/ERN2/NRG1/CHRNA7/DRD4/NOD2/GNG3/TDGF1/MST1R/ADRA2B/AVPI1/NTRK3/TGFB3/TNF/KSR1/RASGRP1/PAK1/KIT/ERBB2/MAPK10/TIAM1/TGFA/MAPK3/AJUBA/FGD2/EPHA4/UBE2V1/MAP2K7/AGER/PTK2B/ARRB1/PDGFB/AKAP13/MAP3K4/PDCD10/PSEN1/SHC1/S1PR2/CRKL/TAOK3/TAB3/SHC2/SYK/MAP4K5/IRAK1/ERN1/TAB1/FZD4/EGFR/LPAR3/DVL2/DUSP19/MAP3K10/TRAF7/PTPN1/MAP2K4/C5/SASH1/MDFIC/PTPN11/GADD45A/CD74/UBA52/IRAK2/MAPKAPK2/NEK10/RPS3/MAPK14/…
GOBP_PROTEIN_CONTAINING_COMPLEX_LOCALIZATION	GOBP_PROTEIN_CONTAINING_COMPLEX_LOCALIZATION	270	0.302476	1.17428	0.02997	0.230253	0.197775	9965	tags=56%, list=53%, signal=26%	NXF3/CACNG8/DRD4/STX1B/GRIP2/DDX25/DLG4/MX2/CEP131/GPC6/SMG6/DHX38/POM121/PRKCZ/NUP210/NACC2/CEP72/KIF5C/TNFAIP2/MCM3AP/TSC1/ARC/DNM1/IWS1/AP3D1/SYMPK/LSG1/CPSF4/THOC1/GPHN/NOP9/NUP133/RALB/DYNC2H1/TERF2/UPF1/AP2B1/IFT57/NUP62/KIF5A/SRSF5/RIOK2/CPSF3/IFT22/NUMB/FIP1L1/RAN/TPR/AGFG1/RNPS1/BBS12/SMG7/KLHL21/ADAM10/SARNP/SETD2/USP46/NUP50/EIF6/IFT74/CPSF2/EIF5A/UPF2/NXF1/NUP214/TTC30A/SRSF2/NCBP1/DL…
GOBP_REGULATION_OF_ANIMAL_ORGAN_MORPHOGENESIS	GOBP_REGULATION_OF_ANIMAL_ORGAN_MORPHOGENESIS	173	0.320174	1.22127	0.02997	0.230253	0.197775	10606	tags=64%, list=57%, signal=28%	PAX8/AJAP1/GRHL3/WNT9B/TNF/SHH/TBX1/MSX1/GPC6/CELSR1/SPEF1/PRICKLE2/TIAM1/FZD3/FGF7/BMP7/PSMB10/PSMC1/WT1/AP2A2/SMURF1/SPRY1/AP2B1/CLTC/RYK/PSMA6/PSME4/PSME2/MLLT3/PRICKLE1/PSMB3/AP2M1/TACSTD2/PSME3/FZD4/SEC24B/DVL2/ANKRD6/AP2S1/PSMC6/HOXB7/RAC1/RSPO3/PSMC4/PSMB8/PSMD13/PSMC2/SIX4/NKD1/PSMD11/SOX9/PSMD3/PSMB7/LGR4/PSMA2/BMPR1A/PSMB1/PSMB2/SOX8/AHI1/FZD5/PSMB9/CSF1/PSMD5/BMP4/ROBO2/CD34/PSMC5/PSMD…
GOMF_CYTOKINE_BINDING	GOMF_CYTOKINE_BINDING	132	0.330281	1.23749	0.02997	0.230253	0.197775	9380	tags=55%, list=50%, signal=27%	CXCR5/CXCR1/CCR9/IL31RA/IL36RN/SOSTDC1/WFIKKN2/TGFBR3L/CXCR2/CCR2/IL22RA1/TGFB3/IL1RN/IL1R2/KLHL20/NBL1/KIT/CD109/ACVR1/TMC8/CXCR3/CHRD/CD36/CCR4/IL6R/ENG/IL3RA/NRP2/CSF1R/PXDN/TNFRSF14/CD4/IFNAR1/FZD4/HAX1/VASN/PLP2/LRRC32/NRP1/PARK7/IL6ST/TNFRSF1B/CD74/TWSG1/OSMR/CSF2RA/LEPR/TRIM16/IFNGR1/TGFBR1/IL2RG/IL18R1/LTBP4/IL11RA/GHR/IL2RB/ACKR1/TRAF2/CCR10/FGF2/IL2RA/TGFBR3/CCR8/NOG/PDPN/CCR5/ITGB3/ITG…
GOBP_COPII_COATED_VESICLE_BUDDING	GOBP_COPII_COATED_VESICLE_BUDDING	72	0.362223	1.29595	0.03	0.230253	0.197775	9571	tags=64%, list=51%, signal=31%	GRIA1/TRAPPC5/INSIG1/GOSR2/TGFA/SEC23B/TRAPPC2/GORASP1/PPP6R1/TMED10/TRAPPC6A/PEF1/F8/LMAN1/SEC24B/TRAPPC9/SEC22B/TRAPPC4/GOLGA2/PPP6C/PDCD6/SCFD1/USO1/NSF/TBC1D20/SEC23A/CTSC/CUL3/ANKRD28/SEC23IP/SEC24D/PPP6R3/F5/CNIH2/COL7A1/SAR1A/CD59/SEC16A/TRAPPC3/SEC24A/VAPA/SEC31A/TRAPPC6B/SAR1B/SCAP/RAB1A
GOCC_HOST_CELLULAR_COMPONENT	GOCC_HOST_CELLULAR_COMPONENT	59	0.375056	1.32235	0.03003	0.230253	0.197775	9529	tags=58%, list=51%, signal=28%	POM121/IFIT1/NUP210/MVB12B/NUP133/NUP62/RAN/TPR/KPNA3/TSG101/VPS37B/NUP50/KPNB1/NUP214/UBA52/NUP37/NDC1/UBAP1/SEH1L/NUP188/VPS37C/NUP35/VPS37A/NUP107/RAE1/NUP54/CD209/AXL/VPS28/UBB/NUP85/AAAS/KPNA6/PI4KA
GOMF_MONOCARBOXYLATE_SODIUM_SYMPORTER_ACTIVITY	GOMF_MONOCARBOXYLATE_SODIUM_SYMPORTER_ACTIVITY	15	0.530052	1.49696	0.0301724	0.230943	0.198368	1890	tags=47%, list=10%, signal=42%	SLC5A8/SLC1A6/SLC6A13/SLC10A6/SLC6A12/SLC10A4/SLC6A11
GOMF_MONOSACCHARIDE_BINDING	GOMF_MONOSACCHARIDE_BINDING	66	0.372865	1.32638	0.0301893	0.230943	0.198368	4829	tags=41%, list=26%, signal=30%	CLEC17A/DBH/COLEC10/CD207/PYGL/GALK1/P3H3/HK1/OGFOD3/SLC2A3/LMAN2/LGALS9/ALPK1/PLOD1/ENG/P4HTM/P3H1/P3H2/FBP1/P4HA1/LMAN1/RPIA/G6PD/GNPNAT1/GPI/PAM/GYS1
GOBP_CENTRIOLE_ASSEMBLY	GOBP_CENTRIOLE_ASSEMBLY	45	0.402053	1.3724	0.0303104	0.231516	0.19886	7457	tags=53%, list=40%, signal=32%	CEP295NL/C10orf90/BRCA1/CENPJ/RTTN/CEP72/E2F4/CEP192/MDM1/CEP152/CEP44/C2CD3/NUP62/CCDC78/KAT2A/KIAA0753/KAT2B/CETN2/NPM1/ALMS1/CEP120/RBM14/STIL/CCDC61
GOBP_REGULATION_OF_T_CELL_MEDIATED_CYTOTOXICITY	GOBP_REGULATION_OF_T_CELL_MEDIATED_CYTOTOXICITY	36	0.415051	1.37653	0.0303337	0.231516	0.19886	6204	tags=44%, list=33%, signal=30%	SLC22A13/KLRC1/IL23A/LILRB1/AZGP1/AGER/PPP3CB/CEACAM1/HLA-A/RIPK3/FCGR2B/CD1D/HLA-E/HLA-DRB1/HLA-F/PTPRC
GOBP_NEGATIVE_REGULATION_OF_EXCITATORY_POSTSYNAPTIC_POTENTIAL	GOBP_NEGATIVE_REGULATION_OF_EXCITATORY_POSTSYNAPTIC_POTENTIAL	10	0.584108	1.51349	0.0304397	0.23191	0.199198	3303	tags=40%, list=18%, signal=33%	NPY2R/CELF4/MTMR2/S1PR2
GOBP_PROTEIN_AUTOPHOSPHORYLATION	GOBP_PROTEIN_AUTOPHOSPHORYLATION	225	0.316661	1.21961	0.0304897	0.23191	0.199198	8649	tags=54%, list=46%, signal=29%	MYO3A/MYLK2/GRK1/NLRP12/BMX/PASK/GRK5/PAK1/KIT/ERBB2/EPHA1/TXK/MAPK3/BTK/TNKS1BP1/ULK1/EPHA4/EPHA7/DDR2/CLK4/MAP3K3/TEK/MINK1/PTK2B/CDK5/TAF1/ENG/FER/PDGFB/PRKD2/IRAK3/PRKG2/NEK2/OXSR1/STK16/TESK1/CSF1R/TAOK3/RIOK2/DYRK1B/CHP1/IRAK1/ERN1/EEF2K/CLK1/STK10/CALM2/TRIM24/EGFR/DDX3X/AURKA/AURKB/MAP3K10/RIPK3/STK33/DYRK1A/FGR/TOM1L1/MEX3B/HTATIP2/VEGFC/EIF2AK4/JAK2/PRKX/SIK1/SLK/MAPKAPK2/NEK10/RAP2A/TR…
GOBP_PROTEIN_PHOSPHOPANTETHEINYLATION	GOBP_PROTEIN_PHOSPHOPANTETHEINYLATION	313	0.298527	1.16531	0.0304897	0.23191	0.199198	9641	tags=58%, list=52%, signal=28%	MINDY4B/TGM7/TTLL13P/TGM1/GGT6/GALNT8/GGT7/MINDY1/TPGS1/OTUD7A/USP2/GALNTL6/ZDHHC15/USP44/PGGHG/GALNT15/TTLL6/TTLL1/USP32/GALNT12/CHM/TTLL11/TXNDC5/TTLL3/ZDHHC24/USP20/TTLL7/RABGGTA/MGAT3/ABHD16A/AKTIP/KAT5/B4GALNT4/YKT6/USP48/B3GNT8/PLOD1/TPST2/NAE1/JOSD2/P4HB/JOSD1/PDIA4/ZDHHC23/OTUD7B/GALNT9/MGAT4C/QSOX1/ATG16L1/TTLL5/GALNT10/USP9X/UBA6/PPME1/HERC5/UBE2M/GALNT16/KAT2A/UBA1/USP30/GOLGA7/DOHH/UB…
GOBP_POSITIVE_REGULATION_OF_CHROMOSOME_SEGREGATION	GOBP_POSITIVE_REGULATION_OF_CHROMOSOME_SEGREGATION	13	0.543562	1.4952	0.0306011	0.232492	0.199698	7073	tags=77%, list=38%, signal=48%	BECN1/CDT1/SIRT2/RAD18/NUMA1/CDC6/AURKB/SMC5/RCC2/HNRNPU
GOBP_ENDOMEMBRANE_SYSTEM_ORGANIZATION	GOBP_ENDOMEMBRANE_SYSTEM_ORGANIZATION	457	0.289237	1.14319	0.030969	0.233306	0.200397	10699	tags=61%, list=57%, signal=27%	GOLGA8K/GOLGA8M/XKR5/ANXA8/SPINK2/S100A9/CASQ1/ANO9/ABCA7/ATP8B3/TLE6/CRB1/AQP11/HOOK2/DNAJC28/ANXA8L1/ANK2/SPAG4/GET4/XKR9/VPS18/ALS2CL/RILP/PLK1/ABCA1/SYP/BCAS3/HACE1/SNX33/MAPK3/EMC8/RBSN/BAIAP2/ATL1/COG4/TRAM2/DMPK/GOLGA8R/AKTIP/TANGO2/IST1/NEMP1/CHMP7/EMC1/LMAN2/DCTN1/TMEM170A/GBF1/ARFGEF2/HUWE1/SERPINE2/DNM1/AP3D1/SYNE1/PARP11/BAIAP2L1/MPP5/GORASP1/COG2/TMED10/COG1/CLASP2/PDCD10/ZNF385A/DYN…
GOBP_MITOCHONDRIAL_TRANSPORT	GOBP_MITOCHONDRIAL_TRANSPORT	247	0.305793	1.18254	0.030969	0.233306	0.200397	8957	tags=51%, list=48%, signal=27%	SLC25A2/NOL3/HSPA1L/PRKAB2/CPT1B/NAIF1/MPV17L/SLC25A4/MIPEP/CNP/ABLIM3/SLC25A30/TOMM20L/SIRT4/HUWE1/CPT2/SREBF2/UCP2/PRKAA2/SLC25A12/FIS1/SLC25A1/AFG3L2/MTERF4/VPS11/PSEN1/BBC3/MID1IP1/SLC25A37/ALKBH7/RAC2/PPIF/SLC25A10/RNF31/MRS2/FBXO7/MICALL2/MTX2/PPP1R13B/SFXN1/TIMM10B/LMAN1/HSPA1A/HAX1/HIP1R/VDAC2/TOMM5/TOMM22/COX18/VDAC1/GZMB/HTRA2/TIMM17B/MICU2/SLC25A36/SH3GLB1/YWHAB/AGK/TOMM70/YWHAG/MCU/GR…
GOBP_NEGATIVE_REGULATION_OF_PROTEIN_SERINE_THREONINE_KINASE_ACTIVITY	GOBP_NEGATIVE_REGULATION_OF_PROTEIN_SERINE_THREONINE_KINASE_ACTIVITY	131	0.3315	1.24138	0.030969	0.233306	0.200397	10969	tags=69%, list=59%, signal=29%	SERPINB3/WEE2/SPRED3/CDKN2A/PRKAR1B/DUSP1/NPPA/PLK1/BMP7/SH2B3/CIT/CDKN2D/LRP6/DUSP18/HEXIM1/DUSP16/RGS14/DUSP14/MAPK8IP1/IRAK3/DUSP3/SPRY1/NUP62/HEG1/GPS1/TESK1/FBXO7/MEN1/SMPD1/PYCARD/DUSP19/KAT2B/PTPN1/YWHAG/GADD45A/HIPK3/CDKN1C/ZNF675/PTPN6/PRKCD/LATS2/TFAP4/CDKN1A/RGS4/PRKAG2/RB1/LYN/PKIA/APOE/SPRED2/INPP5K/SPRED1/BMP4/RGS2/CDKN2B/DUSP5/RASIP1/PAQR3/IPO5/APC/PPP2R1A/PTPN22/CIB1/CAV1/DNAJA1/D…
GOBP_POSITIVE_REGULATION_OF_PRODUCTION_OF_MOLECULAR_MEDIATOR_OF_IMMUNE_RESPONSE	GOBP_POSITIVE_REGULATION_OF_PRODUCTION_OF_MOLECULAR_MEDIATOR_OF_IMMUNE_RESPONSE	95	0.346748	1.27043	0.030969	0.233306	0.200397	7905	tags=48%, list=42%, signal=28%	KLK7/NOD2/FFAR3/IL6/NLRP3/TRIM6/TFRC/MZB1/LILRB1/HK1/PRKCZ/CLEC7A/KMT5C/EXOSC6/IL4R/CD36/CD226/MLH1/TNFRSF4/RIF1/TNFRSF14/IL13/MSH2/HLA-A/TP53BP1/MALT1/GPI/CD74/HLA-E/HLA-F/HPX/HMCES/FFAR2/PTPRC/LAPTM5/TICAM1/FZD5/F2RL1/IL18R1/IL5/TRAF2/SLC7A5/EXOSC3/TLR4/PTPN22/PAXIP1
GOBP_REGULATION_OF_EXOCYTOSIS	GOBP_REGULATION_OF_EXOCYTOSIS	190	0.317346	1.21527	0.030969	0.233306	0.200397	10593	tags=62%, list=57%, signal=27%	SYT10/HTR1B/HAP1/CACNA1I/SYT2/STX1B/DRD2/SNCA/DOC2A/CCR2/P2RX1/CADPS/IL1RAPL1/VPS18/CFTR/SYP/SYT17/ADORA2A/STXBP5L/RAB27B/LGALS9/IL4R/STXBP2/REST/CNR1/CDK5/FER/CLASP2/GAB2/SDC1/SDC4/SLC4A8/IL13/RAC2/SYK/VPS4A/CEACAM1/TSG101/RALA/FGR/FCGR2B/RAB13/RAB21/RAB12/APBA1/SYT4/CD177/PTAFR/DNM1L/HLA-F/NSF/STXBP3/SDCBP/RAB10/RAP1B/LYN/CALM1/PCLO/PRKN/HGS/RAB2B/TRIM9/F2RL1/GIT1/ADRA2A/BACE1/SYT15/TRPV6/RAPGE…
GOMF_CALMODULIN_BINDING	GOMF_CALMODULIN_BINDING	194	0.317442	1.21659	0.030969	0.233306	0.200397	8741	tags=52%, list=47%, signal=28%	MYH8/MYO1A/MYH7/MYO3A/NOS1/MYH6/MYLK2/TRPV5/ITPKA/MYH1/TRPV1/NOS2/SMTNL1/CAMK1G/MIP/KCNN1/GRIN1/TRPV4/MYH2/OBSCN/RYR3/CAMK1/SPHK1/CFAP221/SNTA1/TTN/RASGRF2/ORAI1/MYO1F/CAMK2G/GAP43/PHKA2/ADD3/KCNN2/NRGN/MYO15A/NOS3/PHKG2/CALD1/PLA2G6/MARCKS/MYO1C/INVS/PHKB/PPP3CB/ENKUR/EEF2K/CNN2/EGFR/CEACAM1/MYH9/CNN3/STRN/TRPM4/MYLK/RGS1/PLCB1/MAPKAPK2/AKAP12/FAS/EWSR1/MYO1B/KCNN4/MYO1E/MARCKSL1/MAP2/RGS4/ITPKC…
GOMF_EXTRACELLULAR_LIGAND_GATED_ION_CHANNEL_ACTIVITY	GOMF_EXTRACELLULAR_LIGAND_GATED_ION_CHANNEL_ACTIVITY	70	0.363438	1.29863	0.030969	0.233306	0.200397	2707	tags=30%, list=15%, signal=26%	CHRNB4/HTR3E/GRIN2B/CHRNB2/CHRNA7/GRID2/TRPV1/GRIA1/CHRNA3/GABRA3/GRIN1/P2RX1/CHRNA6/GABRD/GRIA3/ZACN/GRIK2/GRIN2D/GABRB2/CHRNA10/PTK2B
[truncated: 342 more rows]
