# Supplementary material for: Comprehensive analysis of integrin αvβ3/α6β1 in prognosis and immune escape of prostate cancer
Source: Aging (Albany NY). 2023 Oct 19;15(20):11369–88. doi: 10.18632/aging.205131 (PMC10637796; doi:10.18632/aging.205131)
Supplement: Supplementary Table 2 [file aging-15-205131-s003.xlsx]

## Sheet: GSEA.result
Supplementary Table 2. GO enrichment analysis for two risk groups in GEO cohort.
ID	Description	setSize	enrichmentScore	NES	pvalue	p.adjust	qvalues	rank	leading_edge	core_enrichment
GOBP_AEROBIC_RESPIRATION	GOBP_AEROBIC_RESPIRATION	74	0.627402	4.39821	1e-10	9.42353e-09	7.48762e-09	2791	tags=51%, list=9%, signal=47%	IDH1/MTFR1/COX7B/SDHD/UQCRH/COX6A1/SUCLG2/SDHB/ME2/DLD/COX8A/MDH1/COX5A/UQCRB/UQCRHL/COX6B1/COX7A2L/COX5B/NDUFA4/ACO2/SUCLA2/DLAT/CAT/SDHC/UQCRC2/BNIP3/COX6C/COX7C/OXA1L/IDE/PDHB/SHMT2/IREB2/SURF1/FH/HIF1A/MDH2/SDHA
GOBP_ANAPHASE_PROMOTING_COMPLEX_DEPENDENT_CATABOLIC_PROCESS	GOBP_ANAPHASE_PROMOTING_COMPLEX_DEPENDENT_CATABOLIC_PROCESS	79	0.536382	3.80616	1e-10	9.42353e-09	7.48762e-09	3066	tags=43%, list=10%, signal=39%	CDC20/PSMC4/PTTG1/PSMA3/PSMD6/PSMA6/AURKA/PSMD10/UBE2E1/PSMA5/ANAPC10/UBB/PSMB5/PSMD14/PSMA1/UBE2C/PSMA4/ANAPC7/PSMC2/AURKB/PSMB4/PSME2/PSMC6/PSMD7/PSMD2/PSMB2/ANAPC5/PSMB7/PSMD5/PSMB1/RPS27A/PSMA2/MAD2L1/PSME3
GOBP_ANTIGEN_PROCESSING_AND_PRESENTATION_OF_EXOGENOUS_PEPTIDE_ANTIGEN_VIA_MHC_CLASS_I	GOBP_ANTIGEN_PROCESSING_AND_PRESENTATION_OF_EXOGENOUS_PEPTIDE_ANTIGEN_VIA_MHC_CLASS_I	80	0.497253	3.57278	1e-10	9.42353e-09	7.48762e-09	4126	tags=48%, list=13%, signal=41%	PSMC4/PSMA3/PSMD6/PSMA6/PSMD10/PSMA5/PSMB5/PSMD14/FCER1G/ITGAV/SNAP23/PSMA1/B2M/PSMA4/PSMC2/PSMB4/PSME2/PSMC6/PSMD7/PSMD2/PSMB2/SEC22B/PSMB7/PSMD5/PSMB1/PSMA2/PSME3/CD36/HLA-B/PSMB6/IFI30/FCGR1A/FCGR1B/PSMD13/CYBA/PSMD4/PSMD8/PSMB9
GOBP_ANTIGEN_PROCESSING_AND_PRESENTATION_OF_PEPTIDE_ANTIGEN_VIA_MHC_CLASS_I	GOBP_ANTIGEN_PROCESSING_AND_PRESENTATION_OF_PEPTIDE_ANTIGEN_VIA_MHC_CLASS_I	99	0.445382	3.5332	1e-10	9.42353e-09	7.48762e-09	4126	tags=45%, list=13%, signal=40%	PSMC4/PSMA3/PSMD6/PSMA6/SAR1B/PSMD10/PSMA5/SEC24D/PSMB5/PSMD14/FCER1G/ITGAV/SNAP23/PSMA1/B2M/PSMA4/PSMC2/SEC13/CANX/PSMB4/PSME2/IDE/PSMC6/PSMD7/PSMD2/PSMB2/SEC22B/PSMB7/PSMD5/PSMB1/PSMA2/SEC24A/PSME3/CD36/HLA-B/BCAP31/PSMB6/IFI30/FCGR1A/FCGR1B/PSMD13/CYBA/PSMD4/PSMD8/PSMB9
GOBP_ATP_SYNTHESIS_COUPLED_ELECTRON_TRANSPORT	GOBP_ATP_SYNTHESIS_COUPLED_ELECTRON_TRANSPORT	80	0.708596	5.09128	1e-10	9.42353e-09	7.48762e-09	3424	tags=62%, list=11%, signal=56%	NDUFB6/NDUFB5/NDUFA12/COX7B/UQCRFS1/NDUFB3/SDHD/UQCRH/COX6A1/NDUFAF1/CYC1/DLD/NDUFA11/NDUFA2/COX8A/COX5A/UQCRB/UQCRHL/COX6B1/COX7A2L/NDUFAB1/NDUFB2/COX5B/NDUFB9/NDUFA3/NDUFA1/UQCRQ/NDUFA4/NDUFA7/SDHC/UQCRC2/NDUFC1/NDUFS4/SNCA/COX6C/NDUFB7/PARK7/COX7C/NDUFA8/NDUFS5/CHCHD2/NDUFB11/SDHA/NDUFV2/NDUFB10/NDUFS3/NDUFV1/GHITM/NDUFV3/PINK1
GOBP_COTRANSLATIONAL_PROTEIN_TARGETING_TO_MEMBRANE	GOBP_COTRANSLATIONAL_PROTEIN_TARGETING_TO_MEMBRANE	100	0.797601	6.43492	1e-10	9.42353e-09	7.48762e-09	3224	tags=68%, list=10%, signal=61%	RPS7/RPL29/RPS21/RPL34/RPL21/RPS2/RPLP0/RPL26/SEC61B/RPS4X/RPL8/RPS26/RPS13/SRP54/RPL7/RPS15A/RPL10A/RPL17/RPL14/RPL36/SRP9/RPL30/SRP72/RPL35A/TRAM1/SSR1/RPL13A/RPL24/RPL12/RPL23A/RPS24/RPL31/RPL22/RPL7A/RPL9/RPS5/SSR3/TRAM2/RPS9/ARL6IP1/RPL19/SSR2/RPS18/RPS15/SRP14/RPL39/RPL6/RPL27/RPL15/RPL23/RPS17/RPS6/RPS8/RPS14/RPS3/SRP19/RPS25/RPS12/RPS27A/RPS29/RPS3A/RPS28/RPS20/RPSA/RPLP1/RPL36A/RPL27A/RP…
GOBP_CYTOPLASMIC_TRANSLATION	GOBP_CYTOPLASMIC_TRANSLATION	91	0.664689	4.92213	1e-10	9.42353e-09	7.48762e-09	3956	tags=65%, list=13%, signal=57%	RPL29/RPS21/NCK1/EIF3M/RPLP0/RPL26/ZC3H15/DPH5/MCTS1/EIF3F/EIF3J/RPL26L1/RPL8/RPS26/RPL10A/RPL17/RPL36/RPL30/EIF2S3/RPL35A/RPL13A/DHX36/RPL24/RPL31/RPL22/RPL9/CNBP/EIF4H/EIF3CL/RPL19/EIF3H/DRG1/GSPT1/RPL39/EIF3I/RPL6/RPL15/RBM4/YTHDF2/FTSJ1/RPS29/METTL3/RPS28/RPSA/EIF3K/EIF4B/GSPT2/RPLP1/DPH1/RPL36A/RPL38/DHX29/RPL22L1/CPEB4/EIF3L/EIF4A1/DNAJC24/DPH2/RPL32
GOBP_CYTOPLASMIC_TRANSLATIONAL_INITIATION	GOBP_CYTOPLASMIC_TRANSLATIONAL_INITIATION	31	0.681018	3.76544	1e-10	9.42353e-09	7.48762e-09	3791	tags=61%, list=12%, signal=54%	NCK1/EIF3M/MCTS1/EIF3F/EIF3J/EIF2S3/RPL13A/EIF4H/EIF3CL/EIF3H/EIF3I/RBM4/YTHDF2/METTL3/EIF3K/EIF4B/DHX29/EIF3L/EIF4A1
GOBP_DNA_DAMAGE_RESPONSE_DETECTION_OF_DNA_DAMAGE	GOBP_DNA_DAMAGE_RESPONSE_DETECTION_OF_DNA_DAMAGE	38	0.57306	3.38148	1e-10	9.42353e-09	7.48762e-09	3474	tags=55%, list=11%, signal=49%	MRPS35/RPA3/UBB/NEK1/RBX1/RFC4/PCNA/MRPS11/DNAJA1/RPS3/RPS27A/RPA1/MRPS26/PNKP/POLD2/RPA2/CUL4A/SOX4/RFC3/MRPS9/USP1
GOBP_ESTABLISHMENT_OF_PROTEIN_LOCALIZATION_TO_ENDOPLASMIC_RETICULUM	GOBP_ESTABLISHMENT_OF_PROTEIN_LOCALIZATION_TO_ENDOPLASMIC_RETICULUM	113	0.742805	6.16507	1e-10	9.42353e-09	7.48762e-09	3224	tags=64%, list=10%, signal=57%	RPS7/RPL29/RPS21/RPL34/RPL21/EDEM1/RPS2/RPLP0/SEC61G/RPL26/SPCS1/SEC61B/RPS4X/RPL8/RPS26/RPS13/SRP54/RPL7/RPS15A/SPCS3/RPL10A/RPL17/RPL14/RPL36/SRP9/RPL30/SRP72/RPL35A/TRAM1/RAB10/RPL13A/RPL24/RPL12/RPL23A/RPS24/RPL31/RPL22/RPL7A/RPL9/RPS5/SSR3/TRAM2/RPS9/RPL19/SRPRB/RPS18/RPS15/SRP14/RPL39/RPL6/RPL27/RPL15/RPL23/RPS17/SPCS2/RPS6/RPS8/RPS14/RPS3/SRP19/RPS25/RPS12/RPS27A/RPS29/RPS3A/RPS28/RPS20/RP…
GOBP_EXTERNAL_ENCAPSULATING_STRUCTURE_ORGANIZATION	GOBP_EXTERNAL_ENCAPSULATING_STRUCTURE_ORGANIZATION	380	-0.385233	-2.04799	1e-10	9.42353e-09	7.48762e-09	4773	tags=30%, list=15%, signal=26%	MMP13/HAPLN2/MMP16/ADAMTS15/GPM6B/COL4A4/TNFRSF1B/COL4A1/COL24A1/ADAMTS2/ITGB8/MFAP5/BMP1/COL19A1/COL8A2/QSOX1/LAMA5/NF1/FGB/FOXC2/ITGA2B/COLQ/SPINK5/FLRT2/COL27A1/ADAMTSL3/ELN/NFKB2/EGFLAM/FGF2/SULF2/HTRA1/TNFRSF1A/FERMT1/MMP3/LRP1/ICAM5/A2M/COL5A3/CAPNS2/AGRN/COL4A6/ADAMTSL2/TGM1/PAPLN/RAMP2/ELANE/FBLN5/LAMC3/SOX9/ITGA7/TNC/BCL3/NTN4/FBLN1/COL6A3/CLASP1/LAMA4/COL4A5/COL4A2/LOXL4/EFEMP2/ITGA9/IT…
GOBP_MITOCHONDRIAL_ELECTRON_TRANSPORT_NADH_TO_UBIQUINONE	GOBP_MITOCHONDRIAL_ELECTRON_TRANSPORT_NADH_TO_UBIQUINONE	47	0.689389	4.09535	1e-10	9.42353e-09	7.48762e-09	3424	tags=62%, list=11%, signal=55%	NDUFB6/NDUFB5/NDUFA12/NDUFB3/NDUFAF1/DLD/NDUFA11/NDUFA2/NDUFAB1/NDUFB2/NDUFB9/NDUFA3/NDUFA1/NDUFA4/NDUFA7/NDUFC1/NDUFS4/SNCA/NDUFB7/PARK7/NDUFA8/NDUFS5/NDUFB11/NDUFV2/NDUFB10/NDUFS3/NDUFV1/NDUFV3/PINK1
GOBP_MITOCHONDRIAL_RESPIRATORY_CHAIN_COMPLEX_ASSEMBLY	GOBP_MITOCHONDRIAL_RESPIRATORY_CHAIN_COMPLEX_ASSEMBLY	71	0.592898	4.0881	1e-10	9.42353e-09	7.48762e-09	4165	tags=63%, list=13%, signal=55%	TMEM126A/NDUFB6/NDUFB5/NDUFA12/UQCRFS1/NDUFB3/COX17/TMEM126B/NDUFAF1/NDUFA11/NDUFA2/SCO2/NDUFAB1/NDUFB2/IMMP2L/NDUFB9/NDUFA3/NDUFA1/SCO1/NDUFA7/NDUFC1/NDUFAF2/NDUFS4/SDHAF1/NDUFB7/OXA1L/FASTKD3/SURF1/NDUFA8/NDUFS5/NDUFB11/OMA1/NDUFV2/NDUFB10/NDUFS3/NDUFV1/NDUFV3/CHCHD4/NDUFS2/SAMM50/AIFM1/BCS1L/TTC19/ACAD9/TACO1
GOBP_MITOCHONDRIAL_TRANSLATION	GOBP_MITOCHONDRIAL_TRANSLATION	121	0.698407	6.12593	1e-10	9.42353e-09	7.48762e-09	3558	tags=64%, list=11%, signal=57%	MRPS35/MRPS28/MRPS33/MRPS30/MRPL15/MRPL24/MRPL20/MRPL45/MRPL13/MRPL33/MRPL42/MRPL49/MRPL36/YARS2/FASTKD2/MRPL18/MRPL19/IARS2/MRPL48/MRPL22/MRPS34/MRPL51/CHCHD1/MRPS17/MRPL3/MRPL53/MRPS22/MRPL50/MRPS21/C1QBP/NDUFA7/MRPL9/MRPS18C/MRPS23/MRPL41/MRPL54/MRPL47/MRPL46/MRPL34/MRPS24/MRPS7/MRPS6/MRPS11/MRPL14/OXA1L/FASTKD3/SHMT2/MRPL30/MRPL12/MRPL40/MRPL39/MRPL1/MRPL16/WARS2/DARS2/DAP3/MRPL35/GFM1/TUFM/M…
GOBP_MITOCHONDRIAL_TRANSLATIONAL_TERMINATION	GOBP_MITOCHONDRIAL_TRANSLATIONAL_TERMINATION	87	0.711713	5.17475	1e-10	9.42353e-09	7.48762e-09	3558	tags=70%, list=11%, signal=62%	MRPS35/MRPS28/MRPS33/MRPS30/MRPL15/MRPL24/MRPL20/MRPL45/MRPL13/MRPL33/MRPL42/MRPL49/MRPL36/MRPL18/MRPL19/MRPL48/MRPL22/MRPS34/MRPL51/CHCHD1/MRPS17/MRPL3/MRPL53/MRPS22/MRPL50/MRPS21/MRPL9/MRPS18C/MRPS23/MRPL41/MRPL54/MRPL47/MRPL46/MRPL34/MRPS24/MRPS7/MRPS6/MRPS11/MRPL14/OXA1L/MRPL30/MRPL12/MRPL40/MRPL39/MRPL1/MRPL16/DAP3/MRPL35/MRPL23/MRPL17/MRPL37/MRPS27/MRPS26/MRPL32/MRPS15/MRPS14/MRPL21/MRPS12/…
GOBP_MUSCLE_SYSTEM_PROCESS	GOBP_MUSCLE_SYSTEM_PROCESS	423	-0.34134	-1.82458	1e-10	9.42353e-09	7.48762e-09	3458	tags=23%, list=11%, signal=20%	PLCE1/MYBPC3/FXYD1/MYOZ2/EDN1/RGS4/PPP1R13L/CALCA/BDKRB2/PDE9A/P2RX6/TBX3/HTR2A/GATA5/SLMAP/SORBS3/SULF2/RGS2/CAMK2B/TNFRSF1A/LMCD1/OXT/SSPN/STAC/GNAO1/ATP1A2/DYSF/P2RX2/SLC9A1/KCNB2/MYOCD/SCN2B/ACTG2/EDN2/KCNA5/SLC6A8/GJC1/MIR21/CKMT2/IGFBP5/TPM1/CACNA1C/P2RX1/TBX2/ZC3H12A/PAK1/AKAP13/LMNA/SORBS1/RNF207/BIN1/VCL/CALD1/SGCA/KCNMA1/SRF/EDN3/DAPK3/CAV1/CD38/MYH3/TPM2/MYOF/FOXO1/ERRFI1/SMAD3/STC1/NO…
GOBP_MUSCLE_TISSUE_DEVELOPMENT	GOBP_MUSCLE_TISSUE_DEVELOPMENT	345	-0.361087	-1.90881	1e-10	9.42353e-09	7.48762e-09	3708	tags=26%, list=12%, signal=23%	COL19A1/SMO/NF1/PITX1/MAPK11/MYBPC3/MYOZ2/FOXC2/EDN1/RGS4/PPP1R13L/TBX18/DDX17/JPH2/STRA6/ANKRD1/LRRC10/BTG2/TBX3/POU4F1/ELN/FGF2/GATA5/ZFPM2/HLF/RGS2/HOXD9/FHL2/BCL9L/P2RX2/SLC9A1/DKK1/VEGFA/MYOCD/KLF5/GJC1/CREB1/EPHB1/IGFBP5/TPM1/BMP7/RBP4/PIM1/BCL2/TBX2/KCNAB1/PAK1/AKAP13/MEIS1/SOX9/KDM6B/SVIL/SRF/DLL1/EFEMP2/ATF3/WNT3A/OSR1/CAV1/ALDH1A2/GPC1/FHOD3/SMAD3/ISL1/NOTCH1/CSRP1/MYLK/ACTC1/EGR1/MAFF/…
GOBP_NADH_DEHYDROGENASE_COMPLEX_ASSEMBLY	GOBP_NADH_DEHYDROGENASE_COMPLEX_ASSEMBLY	49	0.663973	3.99245	1e-10	9.42353e-09	7.48762e-09	3263	tags=57%, list=10%, signal=51%	TMEM126A/NDUFB6/NDUFB5/NDUFA12/NDUFB3/TMEM126B/NDUFAF1/NDUFA11/NDUFA2/NDUFAB1/NDUFB2/NDUFB9/NDUFA3/NDUFA1/NDUFA7/NDUFC1/NDUFAF2/NDUFS4/NDUFB7/OXA1L/NDUFA8/NDUFS5/NDUFB11/NDUFV2/NDUFB10/NDUFS3/NDUFV1/NDUFV3
GOBP_NUCLEAR_TRANSCRIBED_MRNA_CATABOLIC_PROCESS_NONSENSE_MEDIATED_DECAY	GOBP_NUCLEAR_TRANSCRIBED_MRNA_CATABOLIC_PROCESS_NONSENSE_MEDIATED_DECAY	115	0.618365	5.1196	1e-10	9.42353e-09	7.48762e-09	3224	tags=55%, list=10%, signal=49%	RPS7/RPL29/RPS21/RPL34/RPL21/RPS2/RPLP0/RPL26/RPS4X/RPL8/RPS26/RPS13/RPL7/RPS15A/RPL10A/RPL17/RPL14/RPL36/RPL30/RPL35A/RPL13A/RPL24/RPL12/RPL23A/RPS24/RPL31/RPL22/RPL7A/RPL9/RPS5/RPS9/RPL19/RPS18/GSPT1/RPS15/RPL39/MAGOH/RPL6/RPL27/RPL15/RPL23/RPS17/PNRC2/EIF4A3/RPS6/RPS8/RPS14/RPS3/RPS25/PPP2CA/RPS12/RPS27A/RPS29/RPS3A/RPS28/RPS20/RPSA/GSPT2/RPLP1/NCBP2/RPL36A/RPL27A/RPL38
GOBP_OXIDATIVE_PHOSPHORYLATION	GOBP_OXIDATIVE_PHOSPHORYLATION	103	0.585428	4.73448	1e-10	9.42353e-09	7.48762e-09	3263	tags=53%, list=10%, signal=48%	NDUFB6/NDUFB5/NDUFA12/COX7B/UQCRFS1/NDUFB3/SDHD/UQCRH/COX6A1/COX7A2/NDUFAF1/CYC1/DLD/NDUFA11/NDUFA2/COX8A/COX5A/UQCRB/UQCRHL/COX6B1/COX7A2L/NDUFAB1/NDUFB2/COX5B/NDUFB9/NDUFA3/NDUFA1/ATP7A/UQCRQ/NDUFA4/NDUFA7/SDHC/UQCRC2/NDUFC1/NDUFS4/SNCA/COX6C/NDUFB7/PARK7/COX7C/SHMT2/SURF1/NDUFA8/NDUFS5/CHCHD2/NDUFB11/PDE12/SDHA/NDUFV2/NDUFB10/NDUFS3/NDUFV1/VCP/GHITM/NDUFV3
GOBP_POSITIVE_REGULATION_OF_TELOMERASE_RNA_LOCALIZATION_TO_CAJAL_BODY	GOBP_POSITIVE_REGULATION_OF_TELOMERASE_RNA_LOCALIZATION_TO_CAJAL_BODY	15	0.893394	3.78362	1e-10	9.42353e-09	7.48762e-09	2743	tags=93%, list=9%, signal=85%	CCT2/NHP2/CCT8/TCP1/CCT7/CCT6A/NOP10/RUVBL1/SHQ1/RUVBL2/CCT5/DKC1/CCT3/CCT4
GOBP_PROTEIN_LOCALIZATION_TO_ENDOPLASMIC_RETICULUM	GOBP_PROTEIN_LOCALIZATION_TO_ENDOPLASMIC_RETICULUM	140	0.672156	6.12245	1e-10	9.42353e-09	7.48762e-09	3224	tags=58%, list=10%, signal=52%	RPS7/RPL29/RPS21/KDELR2/RPL34/GPAA1/RPL21/EDEM1/RPS2/RPLP0/SEC61G/KDELR3/RPL26/SPCS1/SEC61B/RPS4X/RPL8/RPS26/RPS13/SRP54/RPL7/RPS15A/SPCS3/RPL10A/RPL17/RPL14/RPL36/SRP9/RPL30/SRP72/RPL35A/TRAM1/GABARAPL2/RAB10/RPL13A/RPL24/RPL12/RPL23A/RPS24/RPL31/RPL22/RPL7A/RPL9/RPS5/SSR3/TRAM2/RPS9/RPL19/SRPRB/RPS18/RPS15/SRP14/RPL39/RPL6/RPL27/RPL15/RPL23/RPS17/SPCS2/RPS6/RPS8/RTN4/RPS14/RPS3/SRP19/BCAP29/RPS…
GOBP_PROTEIN_N_LINKED_GLYCOSYLATION	GOBP_PROTEIN_N_LINKED_GLYCOSYLATION	69	0.49019	3.33226	1e-10	9.42353e-09	7.48762e-09	3333	tags=46%, list=11%, signal=42%	OSTC/STT3B/ALG14/SLC39A8/GFPT1/DAD1/PGM3/TUSC3/ALG1/DPM1/DOLPP1/ENTPD5/MGAT4A/ALG6/DDOST/DPM3/STT3A/ALG5/MGAT2/PMM1/LMAN1/TMEM165/ALG13/ALG10B/ALG8/ALG9/RPN1/DPAGT1/NUDT14/MCFD2/MPDU1/PMM2
GOBP_REGULATION_OF_CELLULAR_AMINE_METABOLIC_PROCESS	GOBP_REGULATION_OF_CELLULAR_AMINE_METABOLIC_PROCESS	76	0.418234	2.97646	1e-10	9.42353e-09	7.48762e-09	4190	tags=53%, list=13%, signal=46%	PSMC4/PSMA3/PSMD6/HPRT1/PSMA6/PSMD10/PSMA5/AZIN1/PSMB5/PSMD14/GPR37/PSMA1/PSMA4/PSMC2/PSMB4/PARK7/PSME2/SLC7A7/PSMC6/PSMD7/PSMD2/PSMB2/PSMB7/ITGB2/PSMD5/PSMB1/PSMA2/PSME3/OAZ1/PSMB6/OAZ3/SIRT4/PSMD13/NQO1/PNKD/ODC1/PSMD4/PSMD8/PSMB9/OAZ2
GOBP_REGULATION_OF_CELLULAR_AMINO_ACID_METABOLIC_PROCESS	GOBP_REGULATION_OF_CELLULAR_AMINO_ACID_METABOLIC_PROCESS	62	0.504573	3.2621	1e-10	9.42353e-09	7.48762e-09	4190	tags=58%, list=13%, signal=50%	PSMC4/PSMA3/PSMD6/PSMA6/PSMD10/PSMA5/AZIN1/PSMB5/PSMD14/PSMA1/PSMA4/PSMC2/PSMB4/PARK7/PSME2/SLC7A7/PSMC6/PSMD7/PSMD2/PSMB2/PSMB7/PSMD5/PSMB1/PSMA2/PSME3/OAZ1/PSMB6/OAZ3/SIRT4/PSMD13/NQO1/ODC1/PSMD4/PSMD8/PSMB9/OAZ2
GOBP_REGULATION_OF_TRANSCRIPTION_FROM_RNA_POLYMERASE_II_PROMOTER_IN_RESPONSE_TO_HYPOXIA	GOBP_REGULATION_OF_TRANSCRIPTION_FROM_RNA_POLYMERASE_II_PROMOTER_IN_RESPONSE_TO_HYPOXIA	75	0.427083	3.01527	1e-10	9.42353e-09	7.48762e-09	4126	tags=49%, list=13%, signal=43%	PSMC4/PSMA3/PSMD6/PSMA6/PSMD10/PSMA5/UBB/RBX1/PSMB5/PSMD14/HIGD1A/PSMA1/PSMA4/PSMC2/PSMB4/CITED2/PSME2/PSMC6/PSMD7/PSMD2/PSMB2/PSMB7/HIF1A/PSMD5/PSMB1/RPS27A/EGLN1/PSMA2/PSME3/PSMB6/SIRT2/CUL2/PSMD13/EP300/PSMD4/PSMD8/PSMB9
GOBP_RESPIRATORY_ELECTRON_TRANSPORT_CHAIN	GOBP_RESPIRATORY_ELECTRON_TRANSPORT_CHAIN	96	0.64502	4.77889	1e-10	9.42353e-09	7.48762e-09	3263	tags=59%, list=10%, signal=53%	ETFA/NDUFB6/NDUFB5/NDUFA12/COX7B/UQCRFS1/NDUFB3/SDHD/UQCRH/COX6A1/SDHB/NDUFAF1/CYC1/DLD/NDUFA11/NDUFA2/COX8A/COX5A/UQCRB/UQCRHL/COX6B1/COX7A2L/SCO2/NDUFAB1/NDUFB2/COX5B/IMMP2L/NDUFB9/NDUFA3/NDUFA1/UQCRQ/NDUFA4/NDUFA7/SDHC/UQCRC2/NDUFC1/NDUFS4/SNCA/COX6C/NDUFB7/PARK7/SLC25A22/COX7C/NDUFA8/NDUFS5/ETFDH/CHCHD2/NDUFB11/SDHA/NDUFV2/NDUFB10/NDUFS3/ETFB/NDUFV1/SLC25A13/GHITM/NDUFV3
GOBP_RETROGRADE_VESICLE_MEDIATED_TRANSPORT_GOLGI_TO_ENDOPLASMIC_RETICULUM	GOBP_RETROGRADE_VESICLE_MEDIATED_TRANSPORT_GOLGI_TO_ENDOPLASMIC_RETICULUM	84	0.402919	2.90604	1e-10	9.42353e-09	7.48762e-09	3370	tags=39%, list=11%, signal=35%	TMED10/ARF4/KDELR2/GOLPH3/TMED2/TMED7/KDELR3/COPB2/COPZ1/COPB1/COPE/TMED9/SURF4/RACGAP1/COPA/RAB6A/ARF3/GOLPH3L/TMED3/NSF/USE1/SEC22B/COG3/ERGIC3/KIF4A/KIF22/KIF3B/ARCN1/KIF11/BNIP1/ARFGAP3/ARF5/RER1
GOBP_RIBOSOMAL_LARGE_SUBUNIT_BIOGENESIS	GOBP_RIBOSOMAL_LARGE_SUBUNIT_BIOGENESIS	66	0.533639	3.41262	1e-10	9.42353e-09	7.48762e-09	3923	tags=52%, list=12%, signal=45%	NHP2/RPLP0/MRPL20/RPL26/WDR12/NOP16/BRIX1/EBNA1BP2/RPL26L1/FASTKD2/RPL7/RPL10A/ZNHIT3/RPL14/RPL35A/RRS1/RPL24/RPF1/RPL23A/RPL7A/NIP7/RRP15/RPL6/MRPL1/NSA2/RSL24D1/GTPBP4/ZNF622/RPL38/GTF3A/BOP1/RPL3/DDX18/MAK16
GOBP_RIBOSOMAL_SMALL_SUBUNIT_BIOGENESIS	GOBP_RIBOSOMAL_SMALL_SUBUNIT_BIOGENESIS	63	0.455062	3.0057	1e-10	9.42353e-09	7.48762e-09	3912	tags=48%, list=12%, signal=42%	RPS7/RPS21/RPP40/GTF2H5/HEATR1/XRCC5/RIOK2/RRS1/RPS24/RPS5/RCL1/MRPS7/MRPS11/RPS15/RPS17/RPS6/RPS8/BYSL/RPS14/RPS25/RPS28/RPSA/RPL38/TSR2/RIOK3/UTP6/NOL11/NGDN/RPS27L/NOB1
GOBP_RIBOSOME_ASSEMBLY	GOBP_RIBOSOME_ASSEMBLY	56	0.539206	3.46036	1e-10	9.42353e-09	7.48762e-09	3865	tags=50%, list=12%, signal=44%	RPLP0/MRPL20/BRIX1/FASTKD2/XRCC5/EIF2A/MRPL22/RRS1/RPL24/C1QBP/RPL23A/RPS5/NIP7/MRPS7/MRPS11/RPS15/RPL6/RPS14/SBDS/RSL24D1/RPS28/RPSA/RPL38/BOP1/MPV17L2/DHX29/RPL3/RPS27L
GOBP_TRANSCRIPTION_COUPLED_NUCLEOTIDE_EXCISION_REPAIR	GOBP_TRANSCRIPTION_COUPLED_NUCLEOTIDE_EXCISION_REPAIR	72	0.474095	3.26867	1e-10	9.42353e-09	7.48762e-09	4056	tags=49%, list=13%, signal=42%	RPA3/UBB/HMGN1/GTF2H5/COPS5/RBX1/COPS4/POLR2B/RFC4/POLR2D/POLR2H/PCNA/COPS3/POLR2F/MNAT1/COPS8/POLR2L/CCNH/GTF2H3/RPS27A/RPA1/POLR2I/POLR2G/TCEA1/POLD2/PPIE/RPA2/ERCC1/CUL4A/POLR2K/RFC3/ZNF830/EP300/CUL4B/ISY1
GOBP_TRANSLATIONAL_TERMINATION	GOBP_TRANSLATIONAL_TERMINATION	102	0.664042	5.35258	1e-10	9.42353e-09	7.48762e-09	3558	tags=65%, list=11%, signal=58%	MRPS35/MRPS28/MRPS33/TRMT112/MRPS30/MRPL15/ABCE1/MRPL24/MRPL20/MRPL45/MRPL13/MRPL33/MRPL42/MRPL49/MRPL36/MRPL18/MRPL19/MRPL48/MRPL22/MRPS34/MRPL51/CHCHD1/MRPS17/MRPL3/MRPL53/MRPS22/MRPL50/MRPS21/MRPL9/MRPS18C/MRPS23/MRPL41/MRPL54/MRPL47/MRPL46/MRPL34/MRPS24/MRPS7/MRPS6/MRPS11/MRPL14/GSPT1/OXA1L/MRPL30/MRPL12/MRPL40/MRPL39/MRPL1/MRPL16/DAP3/MRPL35/MRPL23/MRPL17/MRPL37/MRPS27/MRPS26/MRPL32/MRPS15/G…
GOCC_ACTIN_FILAMENT_BUNDLE	GOCC_ACTIN_FILAMENT_BUNDLE	65	-0.586596	-2.55933	1e-10	9.42353e-09	7.48762e-09	2905	tags=37%, list=9%, signal=34%	FHL3/BAG3/ROR1/PDLIM7/PDLIM4/CNN2/TPM1/PALLD/SORBS1/LPP/SYNPO2/TRIP6/ACTN4/ZYX/MYLK/ACTN1/FERMT2/ACTA1/PGM5/CRYAB/MYL9/FAM107A/SHROOM4/FLNA
GOCC_COLLAGEN_CONTAINING_EXTRACELLULAR_MATRIX	GOCC_COLLAGEN_CONTAINING_EXTRACELLULAR_MATRIX	408	-0.365245	-1.94785	1e-10	9.42353e-09	7.48762e-09	5517	tags=31%, list=18%, signal=26%	IFNA2/PF4/CILP/VIT/SERPINH1/TPSB2/A1BG/CLU/SEMA7A/ACHE/THSD4/TINAG/ADAMTS15/CDH2/SFRP1/COL4A4/COL4A1/COL24A1/ADAMTS2/GDF10/COL21A1/DST/APOA1/NPPA/MFAP5/COL19A1/COL8A2/LAMA5/WNT2B/FGB/AMELX/TIMP3/S100A10/COLQ/VWA2/FBN3/NTN5/COL27A1/ELN/EGFLAM/FREM2/ANGPTL6/HTRA1/LRRC15/FGF9/EMILIN3/TNN/HPX/A2M/COL5A3/TGM2/EYS/AGRN/COL4A6/BMP7/ITIH4/ANXA11/ELANE/FBLN5/SERPING1/ANGPTL2/LAMC3/SERPINA5/WNT5B/TNC/S100A…
GOCC_COPII_COATED_ER_TO_GOLGI_TRANSPORT_VESICLE	GOCC_COPII_COATED_ER_TO_GOLGI_TRANSPORT_VESICLE	90	0.491601	3.62401	1e-10	9.42353e-09	7.48762e-09	3468	tags=41%, list=11%, signal=37%	TMED10/HLA-DRB1/HLA-DRB5/SEC23B/HLA-DQA1/TMED5/TMED2/IER3IP1/F5/PDCD6/SAR1B/TMED7/SEC24D/HLA-DRA/YIPF6/TMED9/USO1/B2M/CNIH4/HLA-DPA1/SEC13/SEC23IP/YIF1A/KLHL12/HLA-DRB4/TMED3/HLA-DRB3/LMAN1/SEC22B/ERGIC3/TMED4/SEC24A/TMED1/MCFD2/TMED6/HLA-B/APP
GOCC_CYTOCHROME_COMPLEX	GOCC_CYTOCHROME_COMPLEX	27	0.749046	4.0288	1e-10	9.42353e-09	7.48762e-09	2001	tags=59%, list=6%, signal=56%	COX7B/UQCRFS1/UQCRH/COX6A1/CYC1/COX8A/COX5A/UQCRB/UQCRHL/COX6B1/UQCRQ/NDUFA4/UQCRC2/C15orf48/COX7C/NDUFA4L2
GOCC_CYTOSOLIC_LARGE_RIBOSOMAL_SUBUNIT	GOCC_CYTOSOLIC_LARGE_RIBOSOMAL_SUBUNIT	55	0.720555	4.67896	1e-10	9.42353e-09	7.48762e-09	4283	tags=76%, list=14%, signal=66%	RPL29/RPL34/RPL21/RPLP0/RPL26/RPL26L1/RPL8/RPL7/RPL10A/RPL17/RPL36AL/RPL14/RPL36/RPL30/RPL35A/RPL13A/RPL24/RPL12/RPL23A/RPL31/RPL22/RPL7A/RPL9/RPL19/RPL39/RPL6/RPL27/RPL15/RPL23/MRPL1/RSL24D1/RPLP1/RPL36A/RPL27A/RPL38/RPL39L/RPL3/RPL32/RPL28/RPL13/RPL37A/RPL18A
GOCC_CYTOSOLIC_RIBOSOME	GOCC_CYTOSOLIC_RIBOSOME	103	0.654932	5.29658	1e-10	9.42353e-09	7.48762e-09	3999	tags=70%, list=13%, signal=61%	RPS7/RPL29/RPS21/RPL34/RPL21/RPS2/RPLP0/RPL26/MCTS1/RPL26L1/RPS4X/RPL8/RPS26/RPS13/RPL7/RPS15A/RPL10A/RPL17/EIF2A/RPL36AL/RPL14/RPL36/RPL30/RPL35A/RPL13A/RPL24/RPL12/RPL23A/RPS24/RPL31/RPL22/RPL7A/RPL9/RPS5/RPS9/RPL19/RPS18/MRPS11/RPS15/RPL39/RPL6/RPL27/RPL15/RPL23/RPS17/MRPL1/RPS6/RPS8/RPS14/RPS3/RPS25/RPS12/RPS27A/RSL24D1/RPS29/RPS3A/RPS28/RPS20/RPSA/RPLP1/RPL36A/RPL27A/RPL38/RPS4Y2/RPS4Y1/DHX2…
GOCC_CYTOSOLIC_SMALL_RIBOSOMAL_SUBUNIT	GOCC_CYTOSOLIC_SMALL_RIBOSOMAL_SUBUNIT	44	0.692412	4.0653	1e-10	9.42353e-09	7.48762e-09	3580	tags=70%, list=11%, signal=63%	RPS7/RPS21/RPS2/MCTS1/RPS4X/RPS26/RPS13/RPS15A/EIF2A/RPS24/RPS5/RPS9/RPS18/MRPS11/RPS15/RPS17/RPS6/RPS8/RPS14/RPS3/RPS25/RPS12/RPS27A/RPS29/RPS3A/RPS28/RPS20/RPSA/RPS4Y2/RPS4Y1/DHX29
GOCC_ENDOPEPTIDASE_COMPLEX	GOCC_ENDOPEPTIDASE_COMPLEX	67	0.654084	4.35557	1e-10	9.42353e-09	7.48762e-09	4126	tags=61%, list=13%, signal=53%	PIGK/PSMC4/GPAA1/UCHL5/PSMA3/TXNL1/PSMD6/PSMA6/PSMD10/PSMA5/PSMB5/PSMD14/PSMA1/RAD23B/UBE3C/PSMA4/PAAF1/PSMC2/HTRA2/PSMB4/PSME2/UBQLN1/IDE/PSMC6/PSMD7/PIGT/PSMD2/PSMB2/PSMB7/PSMD5/PSMB1/PSMA2/PSME3/VCP/PSMB6/ADRM1/PSMD13/PSMD4/PSMD8/PIGS/PSMB9
GOCC_ENDOPLASMIC_RETICULUM_PROTEIN_CONTAINING_COMPLEX	GOCC_ENDOPLASMIC_RETICULUM_PROTEIN_CONTAINING_COMPLEX	102	0.497553	4.01058	1e-10	9.42353e-09	7.48762e-09	3588	tags=44%, list=11%, signal=39%	PIGK/OSTC/STT3B/GPAA1/PDIA6/PIGH/PIGP/ALG14/DAD1/SEL1L/SEC61G/TUSC3/SPCS1/PIGY/SEC61B/DERL1/SPCS3/FKBP1A/SSR4/SRP9/B2M/PIGC/DDOST/STT3A/PIGM/ARL6IP1/SRPRB/DNAJC10/PIGT/SPCS2/SEC11A/DERL2/SPTLC2/HSD17B12/OS9/RPN1/SEC11C/FAM8A1/INSIG2/VCP/ELOVL6/AMFR/P4HB/ORMDL1/SPTLC1
GOCC_ER_TO_GOLGI_TRANSPORT_VESICLE_MEMBRANE	GOCC_ER_TO_GOLGI_TRANSPORT_VESICLE_MEMBRANE	59	0.552701	3.50116	1e-10	9.42353e-09	7.48762e-09	2433	tags=36%, list=8%, signal=33%	TMED10/HLA-DRB1/HLA-DRB5/SEC23B/HLA-DQA1/TMED2/PDCD6/SAR1B/TMED7/SEC24D/HLA-DRA/USO1/B2M/HLA-DPA1/SEC13/SEC23IP/KLHL12/HLA-DRB4/HLA-DRB3/LMAN1/SEC22B
GOCC_FICOLIN_1_RICH_GRANULE_LUMEN	GOCC_FICOLIN_1_RICH_GRANULE_LUMEN	121	0.402149	3.52737	1e-10	9.42353e-09	7.48762e-09	3320	tags=44%, list=11%, signal=39%	IDH1/PGAM1/PRDX4/PSMD6/HSPA8/PPIA/PSMA5/LRG1/CCT8/MIF/MMP9/PSMD14/ILF2/ACLY/ACTR10/CAND1/CAB39/CTSD/OSTF1/CSTB/DYNLT1/COMMD3/PGM2/CAT/PSMC2/GYG1/CANT1/SRP14/ACTR2/PSMD7/ALDOA/FTH1/GUSB/ARPC5/PSMD2/HSP90AB1/GLB1/PSMB7/KPNB1/YPEL5/PSMB1/PGM1/CSNK2B/PSMA2/GPI/LTA4H/COTL1/PPIE/ACTR1B/VCP/CTSS/APEH/HSP90AA1
GOCC_INNER_MITOCHONDRIAL_MEMBRANE_PROTEIN_COMPLEX	GOCC_INNER_MITOCHONDRIAL_MEMBRANE_PROTEIN_COMPLEX	94	0.701393	5.20769	1e-10	9.42353e-09	7.48762e-09	3918	tags=64%, list=12%, signal=56%	NDUFB6/NDUFB5/NDUFA12/UQCRFS1/NDUFB3/SDHD/APOO/DNAJC19/UQCRH/COX6A1/SDHB/NDUFAF1/CYC1/NDUFA11/NDUFA2/COX5A/UQCRB/UQCRHL/NDUFAB1/NDUFB2/IMMP2L/NDUFB9/NDUFA3/NDUFA1/UQCRQ/TIMM23/NDUFA4/NDUFA7/SDHC/UQCRC2/NDUFC1/ROMO1/NDUFS4/MTX2/C15orf48/NDUFB7/MTX1/GRPEL2/COX7C/NDUFA4L2/NDUFA8/NDUFS5/NDUFB11/HSPA9/GRPEL1/SDHA/CHCHD6/NDUFV2/NDUFB10/NDUFS3/NDUFV1/AGK/CHCHD3/NDUFV3/TIMM10/SLC25A6/NDUFS2/SAMM50/IMMP1L…
GOCC_LARGE_RIBOSOMAL_SUBUNIT	GOCC_LARGE_RIBOSOMAL_SUBUNIT	109	0.718489	5.72719	1e-10	9.42353e-09	7.48762e-09	3224	tags=66%, list=10%, signal=59%	RPL29/RPL34/MRPS30/MRPL15/RPL21/MRPL24/RPLP0/MRPL20/MRPL45/MRPL13/MRPL33/RPL26/MRPL42/MRPL49/MRPL36/RPL26L1/RPL8/MRPL18/MRPL19/RPL7/MRPL48/NDUFAB1/RPL10A/RPL17/RPL36AL/RPL14/RPL36/RPL30/MRPL22/MRPL51/RPL35A/MRPL3/MRPL53/RPL13A/MRPL50/RPL24/RPL12/RPL23A/MRPL9/RPL31/RPL22/RPL7A/RPL9/MRPL41/MRPL54/MRPL47/MRPL46/MRPL34/RPL19/MRPL14/RPL39/RPL6/MRPL30/RPL27/MRPL12/MRPL40/RPL15/RPL23/MRPL39/MRPL1/MRPL16…
GOCC_MITOCHONDRIAL_LARGE_RIBOSOMAL_SUBUNIT	GOCC_MITOCHONDRIAL_LARGE_RIBOSOMAL_SUBUNIT	53	0.726305	4.64426	1e-10	9.42353e-09	7.48762e-09	3176	tags=70%, list=10%, signal=63%	MRPS30/MRPL15/MRPL24/MRPL20/MRPL45/MRPL13/MRPL33/MRPL42/MRPL49/MRPL36/MRPL18/MRPL19/MRPL48/NDUFAB1/MRPL22/MRPL51/MRPL3/MRPL53/MRPL50/MRPL9/MRPL41/MRPL54/MRPL47/MRPL46/MRPL34/MRPL14/MRPL30/MRPL12/MRPL40/MRPL39/MRPL16/MRPL35/MRPL23/MRPL17/MRPL37/MRPL32/MRPL21
GOCC_MITOCHONDRIAL_SMALL_RIBOSOMAL_SUBUNIT	GOCC_MITOCHONDRIAL_SMALL_RIBOSOMAL_SUBUNIT	28	0.76754	4.10334	1e-10	9.42353e-09	7.48762e-09	3463	tags=75%, list=11%, signal=67%	MRPS35/MRPS28/MRPS33/MRPL42/MRPS34/MRPS17/MRPS22/MRPS21/MRPS18C/MRPS24/MRPS7/MRPS6/MRPS11/DAP3/MRPS27/MRPS26/MRPS15/MRPS14/MRPS12/MRPS18B/MRPS9
GOCC_NADH_DEHYDROGENASE_COMPLEX	GOCC_NADH_DEHYDROGENASE_COMPLEX	41	0.722477	4.2301	1e-10	9.42353e-09	7.48762e-09	3263	tags=61%, list=10%, signal=55%	NDUFB6/NDUFB5/NDUFA12/NDUFB3/NDUFAF1/NDUFA11/NDUFA2/NDUFAB1/NDUFB2/NDUFB9/NDUFA3/NDUFA1/NDUFA4/NDUFA7/NDUFC1/NDUFS4/NDUFB7/NDUFA8/NDUFS5/NDUFB11/NDUFV2/NDUFB10/NDUFS3/NDUFV1/NDUFV3
GOCC_ORGANELLAR_RIBOSOME	GOCC_ORGANELLAR_RIBOSOME	82	0.75163	5.42328	1e-10	9.42353e-09	7.48762e-09	3463	tags=73%, list=11%, signal=65%	MRPS35/MRPS28/MRPS33/MRPS30/MRPL15/MRPL24/MRPL20/MRPL45/MRPL13/MRPL33/MRPL42/MRPL49/MRPL36/MRPL18/MRPL19/MRPL48/NDUFAB1/MRPL22/MRPS34/MRPL51/CHCHD1/MRPS17/MRPL3/MRPL53/MRPS22/MRPL50/MRPS21/NDUFA7/MRPL9/MRPS18C/MRPL41/MRPL54/MRPL47/MRPL46/MRPL34/MRPS24/MRPS7/MRPS6/MRPS11/MRPL14/MRPL30/MRPL12/MRPL40/MRPL39/MRPL16/DAP3/MRPL35/MRPL23/MRPL17/MRPL37/MRPS27/MRPS26/MRPL32/MRPS15/MRPS14/MRPL21/MRPS12/MRPS…
GOCC_OXIDOREDUCTASE_COMPLEX	GOCC_OXIDOREDUCTASE_COMPLEX	95	0.524078	3.95192	1e-10	9.42353e-09	7.48762e-09	3488	tags=48%, list=11%, signal=43%	GLDC/NDUFB6/NDUFB5/NDUFA12/UQCRFS1/NDUFB3/SDHD/UQCRH/SDHB/NDUFAF1/CYC1/DLD/NDUFA11/NDUFA2/UQCRB/UQCRHL/NDUFAB1/NDUFB2/NDUFB9/NDUFA3/NDUFA1/UQCRQ/NDUFA4/NDUFA7/DLAT/PDHX/SDHC/UQCRC2/NDUFC1/NDUFS4/NDUFB7/PDHB/NDUFA8/NDUFS5/NDUFB11/RRM1/CBR4/SDHA/NDUFV2/NDUFB10/NDUFS3/NDUFV1/GMPR2/NDUFV3/BCKDHB/P4HB
GOCC_PEPTIDASE_COMPLEX	GOCC_PEPTIDASE_COMPLEX	86	0.600311	4.38382	1e-10	9.42353e-09	7.48762e-09	3185	tags=49%, list=10%, signal=44%	PIGK/PSMC4/GPAA1/UCHL5/PSMA3/TXNL1/PSMD6/PSMA6/PSMD10/SPCS1/PSMA5/ENY2/PSMB5/PSMD14/SPCS3/PSMA1/RAD23B/UBE3C/PSMA4/PAAF1/PSMC2/HTRA2/PSMB4/PSME2/UBQLN1/IDE/PSMC6/PSMD7/PIGT/PSMD2/PSMB2/SPCS2/SEC11A/TAF12/PSMB7/TAF9/PSMD5/PSMB1/SEC11C/PSMA2/PSME3/VCP
GOCC_POLYSOMAL_RIBOSOME	GOCC_POLYSOMAL_RIBOSOME	32	0.641264	3.54255	1e-10	9.42353e-09	7.48762e-09	3224	tags=56%, list=10%, signal=51%	RPS21/RPL8/RPS26/RPL10A/RPL36/RPL30/RPL24/RPL31/RPL7A/BTF3/RPL19/EIF3H/RPL39/RPL6/RPS29/RPS28/RPL36A/RPL38
GOCC_RESPIRASOME	GOCC_RESPIRASOME	79	0.710609	5.04247	1e-10	9.42353e-09	7.48762e-09	3263	tags=62%, list=10%, signal=56%	NDUFB6/NDUFB5/NDUFA12/COX7B/UQCRFS1/NDUFB3/SDHD/UQCRH/COX6A1/COX7A2/SDHB/NDUFAF1/CYC1/NDUFA11/NDUFA2/COX8A/COX5A/UQCRB/UQCRHL/HIGD1A/COX6B1/COX7A2L/NDUFAB1/NDUFB2/NDUFB9/NDUFA3/NDUFA1/UQCRQ/NDUFA4/NDUFA7/SDHC/UQCRC2/NDUFC1/NDUFS4/C15orf48/NDUFB7/COX7C/OXA1L/NDUFA4L2/SURF1/NDUFA8/NDUFS5/NDUFB11/SDHA/NDUFV2/NDUFB10/NDUFS3/NDUFV1/NDUFV3
GOCC_RESPIRATORY_CHAIN_COMPLEX	GOCC_RESPIRATORY_CHAIN_COMPLEX	68	0.746812	5.08509	1e-10	9.42353e-09	7.48762e-09	3263	tags=65%, list=10%, signal=58%	NDUFB6/NDUFB5/NDUFA12/COX7B/UQCRFS1/NDUFB3/SDHD/UQCRH/COX6A1/SDHB/NDUFAF1/CYC1/NDUFA11/NDUFA2/COX8A/COX5A/UQCRB/UQCRHL/COX6B1/NDUFAB1/NDUFB2/NDUFB9/NDUFA3/NDUFA1/UQCRQ/NDUFA4/NDUFA7/SDHC/UQCRC2/NDUFC1/NDUFS4/C15orf48/NDUFB7/COX7C/NDUFA4L2/NDUFA8/NDUFS5/NDUFB11/SDHA/NDUFV2/NDUFB10/NDUFS3/NDUFV1/NDUFV3
GOCC_SMALL_RIBOSOMAL_SUBUNIT	GOCC_SMALL_RIBOSOMAL_SUBUNIT	71	0.718845	4.95652	1e-10	9.42353e-09	7.48762e-09	3580	tags=72%, list=11%, signal=64%	RPS7/RPS21/MRPS35/MRPS28/MRPS33/RPS2/MRPL42/MCTS1/RPS4X/RPS26/RPS13/RPS15A/EIF2A/MRPS34/MRPS17/MRPS22/MRPS21/RPS24/MRPS18C/RPS5/RPS9/MRPS24/MRPS7/RPS18/MRPS6/MRPS11/RPS15/RPS17/RPS6/RPS8/RPS14/RPS3/DAP3/RPS25/RPS12/RPS27A/RPS29/RPS3A/MRPS27/MRPS26/RPS28/RPS20/RPSA/MRPS15/MRPS14/MRPS12/RPS4Y2/MRPS18B/MRPS9/RPS4Y1/DHX29
GOMF_ELECTRON_TRANSFER_ACTIVITY	GOMF_ELECTRON_TRANSFER_ACTIVITY	119	0.582569	5.11901	1e-10	9.42353e-09	7.48762e-09	3263	tags=51%, list=10%, signal=46%	HSD17B6/CYB5A/ETFA/GLDC/NDUFB6/NDUFB5/NDUFA12/COX7B/UQCRFS1/NDUFB3/SDHD/UQCRH/COX6A1/COX7A2/SDHB/ME2/NDUFA2/COX8A/COX5A/UQCRHL/COX6B1/COX7A2L/NDUFAB1/NDUFB2/COX5B/GLRX2/DEGS1/NDUFB9/QDPR/NDUFA3/NDUFA1/UQCRQ/NDUFA4/NDUFA7/CIAPIN1/SDHC/NDUFC1/NDUFAF2/NDUFS4/C15orf48/AKR1A1/COX6C/NDUFB7/COX7C/NDUFA4L2/SURF1/NDUFA8/STEAP4/NDUFS5/ETFDH/NQO2/SDHA/NDUFV2/NDUFB10/NDUFS3/ETFB/AKR7A2/NDUFV1/ADH5/FDX1/NDUFV3
GOMF_HEME_COPPER_TERMINAL_OXIDASE_ACTIVITY	GOMF_HEME_COPPER_TERMINAL_OXIDASE_ACTIVITY	23	0.735496	3.73082	1e-10	9.42353e-09	7.48762e-09	2159	tags=65%, list=7%, signal=61%	CYB5A/COX7B/COX6A1/COX7A2/COX8A/COX5A/COX6B1/COX7A2L/COX5B/NDUFA4/C15orf48/COX6C/COX7C/NDUFA4L2/SURF1
GOMF_ISOMERASE_ACTIVITY	GOMF_ISOMERASE_ACTIVITY	143	0.368205	3.28504	1e-10	9.42353e-09	7.48762e-09	3592	tags=39%, list=11%, signal=35%	PIGK/TOP2A/CYP2J2/PDIA6/ENOPH1/PGAM1/PTGES3/HSD17B4/PDIA5/MCEE/PPIAL4A/PGM3/PPIA/AMACR/PPIL1/EHHADH/TXNDC5/MIF/DDT/GLRX2/FKBP1A/DEGS1/FKBP11/GNE/PPIH/FKBP3/EBPL/PTGES2/PGM2/EBP/PPIC/PMM1/TPI1/MPI/KATNA1/ENOSF1/PGAM4/PGM1/TMX3/DKC1/RPUSD1/GPI/GNPDA1/HSPD1/PPIE/GNPDA2/TOP2B/PUS7/RPE/FKBP2/PMM2/ECH1/GLCE/P4HB/CRELD2/IDI1
GOMF_NAD_P_H_DEHYDROGENASE_QUINONE_ACTIVITY	GOMF_NAD_P_H_DEHYDROGENASE_QUINONE_ACTIVITY	40	0.740551	4.32378	1e-10	9.42353e-09	7.48762e-09	3819	tags=68%, list=12%, signal=59%	NDUFB6/NDUFB5/NDUFA12/NDUFB3/NDUFA2/NDUFAB1/NDUFB2/NDUFB9/NDUFA3/NDUFA1/NDUFA4/NDUFA7/NDUFC1/NDUFAF2/NDUFS4/NDUFB7/NDUFA8/NDUFS5/NQO2/CBR4/NDUFV2/NDUFB10/NDUFS3/NDUFV1/NDUFV3/NDUFS2/NQO1
GOMF_OXIDOREDUCTASE_ACTIVITY_ACTING_ON_A_SULFUR_GROUP_OF_DONORS	GOMF_OXIDOREDUCTASE_ACTIVITY_ACTING_ON_A_SULFUR_GROUP_OF_DONORS	51	0.511448	3.14136	1e-10	9.42353e-09	7.48762e-09	3672	tags=45%, list=12%, signal=40%	PRDX3/GLRX3/PDIA6/TXN/TXNL1/PDIA5/SRXN1/TXNDC17/DLD/SCO2/GLRX2/PTGES2/GLRX5/DNAJC10/PGK1/SUMF1/TMX3/GSTO1/SH3BGRL3/TXNRD1/P4HB/CHCHD4/IFI30
GOMF_OXIDOREDUCTASE_ACTIVITY_ACTING_ON_NAD_P_H	GOMF_OXIDOREDUCTASE_ACTIVITY_ACTING_ON_NAD_P_H	91	0.419753	3.10834	1e-10	9.42353e-09	7.48762e-09	3878	tags=46%, list=12%, signal=41%	PRDX3/TXN/NDUFB6/NDUFB5/NDUFA12/NDUFB3/TXNDC17/DLD/NDUFA2/NDUFAB1/AKR1C3/NDUFB2/NDUFB9/NDUFA3/FMO5/NDUFA1/NDUFA4/NDUFA7/NDUFC1/NDUFAF2/NDUFS4/NDUFB7/PGK1/CBR1/NDUFA8/CYB5R4/NDUFS5/NQO2/CBR4/NDUFV2/NDUFB10/NDUFS3/NDUFV1/GMPR2/NDUFV3/CYB5R1/TXNRD1/NDUFS2/DHDH/NQO1/AIFM1/CYBA
GOMF_OXIDOREDUCTASE_ACTIVITY_ACTING_ON_NAD_P_H_QUINONE_OR_SIMILAR_COMPOUND_AS_ACCEPTOR	GOMF_OXIDOREDUCTASE_ACTIVITY_ACTING_ON_NAD_P_H_QUINONE_OR_SIMILAR_COMPOUND_AS_ACCEPTOR	52	0.600362	3.7945	1e-10	9.42353e-09	7.48762e-09	3263	tags=52%, list=10%, signal=47%	NDUFB6/NDUFB5/NDUFA12/NDUFB3/NDUFA2/NDUFAB1/AKR1C3/NDUFB2/NDUFB9/NDUFA3/NDUFA1/NDUFA4/NDUFA7/NDUFC1/NDUFAF2/NDUFS4/NDUFB7/CBR1/NDUFA8/NDUFS5/NQO2/CBR4/NDUFV2/NDUFB10/NDUFS3/NDUFV1/NDUFV3
GOMF_PROTON_TRANSMEMBRANE_TRANSPORTER_ACTIVITY	GOMF_PROTON_TRANSMEMBRANE_TRANSPORTER_ACTIVITY	96	0.383322	2.83999	1e-10	9.42353e-09	7.48762e-09	2639	tags=34%, list=8%, signal=32%	TMCO3/CYB5A/SLC33A1/SLC39A8/COX7B/ATP6V1A/MFSD3/ATP2C1/COX6A1/COX7A2/COX8A/COX5A/ATP6V0B/COX6B1/COX7A2L/COX5B/ATP6V1G1/SLC2A10/NDUFA4/ATP6V0E2/ATP6V0E1/SLC9A2/C15orf48/COX6C/SLC9A9/COX7C/NDUFA4L2/SURF1/ATP6V0D1/SLC25A3/ATP6V1E2/SLC46A1/CLCN3
GOMF_RIBONUCLEOPROTEIN_COMPLEX_BINDING	GOMF_RIBONUCLEOPROTEIN_COMPLEX_BINDING	116	0.338434	2.90541	1e-10	9.42353e-09	7.48762e-09	4244	tags=42%, list=14%, signal=37%	ABCE1/NMD3/SPCS1/WDR12/DERL1/SRP54/PRMT3/EIF2A/SRP9/SRP72/YTHDF3/PPIH/PPP1CA/C1QBP/LETMD1/SNRPB2/EIF1B/SNRPB/EIF4H/OXA1L/PRMT5/IFIH1/EIF4A3/NME1/DERL2/PQBP1/SRP19/RNF135/PRPF6/PRMT7/SBDS/MRPS27/RPSA/EIF3K/EIF4B/RPLP1/MTIF3/BOP1/DHX29/SND1/CPEB4/CPSF6/SNRPD2/SNRPD1/NOLC1/EIF1/TACO1/GEMIN4/CD2BP2
GOMF_RRNA_BINDING	GOMF_RRNA_BINDING	58	0.617319	3.93756	1e-10	9.42353e-09	7.48762e-09	3723	tags=62%, list=12%, signal=55%	DDX21/RPLP0/MRPL20/FASTKD2/RPS4X/RPL8/MRPL18/RPS13/MRPS17/RRS1/RPL12/RPF1/RPL23A/MRPS18C/RPL9/RPS5/RPS9/MRPS7/RPS18/MRPS6/MRPS11/IMP3/RPL23/MRPL16/RPS14/RPS3/SBDS/FASTKD5/MRPS27/TST/NGRN/RPS4Y2/GTF3A/CIRBP/RPS4Y1/RPL3
GOMF_TRANSLATION_INITIATION_FACTOR_ACTIVITY	GOMF_TRANSLATION_INITIATION_FACTOR_ACTIVITY	48	0.548373	3.20997	1e-10	9.42353e-09	7.48762e-09	4389	tags=58%, list=14%, signal=50%	EIF3M/MCTS1/EIF3F/EIF3J/COPS5/EIF2A/EIF2S3/EIF1B/EIF4H/EIF3CL/EIF3H/EIF3I/EIF2B2/EIF4G2/EIF1AY/EIF4E3/EIF3K/EIF4B/EIF1AX/MTIF3/DHX29/EIF3L/EIF4A1/EIF2B1/EIF4E2/EIF1/EIF2B3/EIF3D
GOMF_UNFOLDED_PROTEIN_BINDING	GOMF_UNFOLDED_PROTEIN_BINDING	105	0.360322	2.97211	1e-10	9.42353e-09	7.48762e-09	3423	tags=41%, list=11%, signal=37%	HSPE1/PTGES3/CCT2/RP2/VBP1/HSPA8/PPIA/NUDCD2/CCT8/NDUFAF1/TCP1/CCT7/TOMM20/CCT6A/CANX/PFDN1/HSPA14/DNAJB6/HTRA2/TRAP1/GRPEL2/SHQ1/RUVBL2/NACA/DNAJA1/LMAN1/HSP90AB1/HSPA9/GRPEL1/CCT5/CCT3/CCT4/PFDN6/CHAF1B/DNAJA4/DNAJA3/HSP90B1/HSPD1/CCT6B/TOR1A/CCDC115/HSP90AA1/CLPX
GOBP_TRNA_METABOLIC_PROCESS	GOBP_TRNA_METABOLIC_PROCESS	135	0.317183	2.86447	1.04298e-10	9.68608e-09	7.69623e-09	3517	tags=30%, list=11%, signal=27%	TRMT112/PPA1/LAGE3/AIMP2/POP7/RPP40/POLR3K/YARS2/HSD17B10/IARS2/TPRKB/LCMT2/POP4/EEF1E1/BCDIN3D/GRSF1/C2orf49/THUMPD3/NARS2/THG1L/CDKAL1/KTI12/WARS2/DARS2/METTL6/FTSJ1/TP53RK/CLP1/RPP21/DDX1/DTD1/ELP4/LARS2/TRMT5/TSEN34/TYW1/PUS7/NSUN2/EARS2/DUS4L/TSEN15
GOCC_ACTOMYOSIN	GOCC_ACTOMYOSIN	67	-0.564238	-2.47026	1.30005e-10	1.1901e-08	9.45616e-09	2905	tags=37%, list=9%, signal=34%	FHL3/CDC42BPA/BAG3/ROR1/PDLIM7/PDLIM4/CNN2/MYO18A/TPM1/PALLD/SORBS1/LPP/SYNPO2/CDC42BPB/TRIP6/ACTN4/ZYX/MYLK/ACTN1/FERMT2/ACTA1/PGM5/MYL9/FAM107A/SHROOM4
GOMF_EXTRACELLULAR_MATRIX_STRUCTURAL_CONSTITUENT	GOMF_EXTRACELLULAR_MATRIX_STRUCTURAL_CONSTITUENT	164	-0.429477	-2.13243	1.46412e-10	1.32142e-08	1.04996e-08	4910	tags=34%, list=16%, signal=29%	THSD4/ENAM/COL4A4/COL4A1/COL24A1/COL21A1/MFAP5/COL19A1/COL8A2/LAMA5/FGB/AMELX/COLQ/FBN3/COL27A1/ELN/EMILIN3/COL5A3/AGRN/COL4A6/MUC4/FBLN5/TNC/FBLN1/COL6A3/LAMA4/COL4A5/COL4A2/EFEMP2/THBS3/FBLN2/ADIPOQ/COL5A1/LAMB3/ECM1/FBN2/COL18A1/COL13A1/MMRN1/MFAP4/COL23A1/COL6A2/MXRA5/COL22A1/EMILIN1/SPON1/SRPX/LTBP4/AEBP1/COL17A1/COL16A1/PODN/LAMB2/COL6A1/DPT/COL7A1
GOCC_INTRINSIC_COMPONENT_OF_MITOCHONDRIAL_MEMBRANE	GOCC_INTRINSIC_COMPONENT_OF_MITOCHONDRIAL_MEMBRANE	67	0.418868	2.78926	2.77259e-10	2.46761e-08	1.96068e-08	3496	tags=42%, list=11%, signal=37%	APOO/COQ2/TOMM20/SCO2/TMEM177/FUNDC1/SCO1/TIMM23/TMEM11/MTX2/BNIP3/MTX1/OXA1L/ABCB10/CCDC51/FIS1/SLC25A4/ETFDH/HSPA9/SLC25A3/CHCHD6/AGK/CHCHD3/GHITM/PINK1/TOMM40/SFXN1/MFF
GOBP_TRICARBOXYLIC_ACID_CYCLE	GOBP_TRICARBOXYLIC_ACID_CYCLE	34	0.593437	3.37874	3.48176e-10	3.05631e-08	2.42844e-08	2791	tags=47%, list=9%, signal=43%	IDH1/SDHD/SUCLG2/SDHB/ME2/DLD/MDH1/ACO2/SUCLA2/DLAT/SDHC/PDHB/IREB2/FH/MDH2/SDHA
GOBP_NUCLEOSIDE_MONOPHOSPHATE_BIOSYNTHETIC_PROCESS	GOBP_NUCLEOSIDE_MONOPHOSPHATE_BIOSYNTHETIC_PROCESS	40	0.532985	3.11189	3.88524e-10	3.36441e-08	2.67324e-08	3586	tags=48%, list=11%, signal=42%	TK1/GMPS/PRPS1/CMPK1/HPRT1/UPRT/PPAT/APRT/DCTD/ADSL/TYMS/DUT/UCK2/DCK/PRPS2/GART/NUDT2/PAICS/IMPDH2
GOBP_PEROXISOME_ORGANIZATION	GOBP_PEROXISOME_ORGANIZATION	79	0.384273	2.72679	4.01321e-10	3.42889e-08	2.72448e-08	3496	tags=38%, list=11%, signal=34%	SLC27A2/IDH1/HSD17B4/PEX7/AMACR/HACL1/ZFAND6/EHHADH/UBB/ACOT8/PEX10/PEX11B/CAT/GNPAT/IDE/MPV17/FIS1/PEX11A/UBE2D3/ACAA1/PEX19/TMEM135/RPS27A/ACOT4/MLYCD/PEX1/PHYH/ACOT2/ECH1/MFF
GOBP_CELL_SUBSTRATE_ADHESION	GOBP_CELL_SUBSTRATE_ADHESION	337	-0.354722	-1.87101	4.3929e-10	3.70391e-08	2.943e-08	3634	tags=24%, list=12%, signal=22%	LAMA5/NF1/UNC13D/FGB/ITGA2B/S100A10/PPFIA2/CORO1C/EPHA3/VWA2/GBP1/PPARD/AXL/EGFLAM/CORO2B/SORBS3/FAT2/FERMT1/LRP1/DLC1/RRAS/TNN/SLC9A1/VEGFA/COL5A3/PPM1F/EPHB1/MUC4/CEACAM6/LYVE1/FBLN5/BCL2/LAMC3/ITGA7/SORBS1/VCL/NTN4/ANGPT1/FBLN1/CLASP1/SRF/EFEMP2/ITGB4/DAPK3/THBS3/FBLN2/PTN/ATXN3/ITGA3/ITGA10/LAMB3/PDPN/TRIP6/TYRO3/COL13A1/ACTN4/ZYX/SMAD3/NOTCH1/ID1/JAM3/SEMA3E/ACTN1/BCL6/EMILIN1/FOXF1/FERMT2/S…
GOBP_TELOMERASE_RNA_LOCALIZATION	GOBP_TELOMERASE_RNA_LOCALIZATION	18	0.779671	3.6206	6.72635e-10	5.59772e-08	4.44776e-08	2743	tags=78%, list=9%, signal=71%	CCT2/NHP2/CCT8/TCP1/CCT7/CCT6A/NOP10/RUVBL1/SHQ1/RUVBL2/CCT5/DKC1/CCT3/CCT4
GOCC_MICROBODY	GOCC_MICROBODY	121	0.319755	2.80467	7.51195e-10	6.17136e-08	4.90355e-08	3592	tags=36%, list=11%, signal=32%	SLC27A2/IDH1/SERHL2/HSD17B4/ISOC1/PEX7/ACSL1/AMACR/HACL1/EHHADH/ACOT8/PEX10/SLC25A17/PEX11B/CAT/GNPAT/GRHPR/ACSL3/PRDX5/MGST1/IDE/MPV17/SOD1/FIS1/PEX11A/PXMP2/ACAA1/PEX19/TMEM135/VIM/PMVK/ACOT4/ARF1/MLYCD/PEX1/PHYH/ACOT2/HSDL2/ECH1/TKT/MFF/IMPDH2/IDI1
GOCC_POLYSOME	GOCC_POLYSOME	61	0.443191	2.83749	1.06196e-09	8.61396e-08	6.84436e-08	3224	tags=43%, list=10%, signal=38%	RPS21/PSMA6/VBP1/RPS4X/RPL8/RPS26/RPL10A/RPL36/RPL30/PSMA1/RPL24/RPL31/RPL7A/BTF3/RPL19/EIF3H/DRG1/RPL39/RPL6/RPS6/RPS3/RPS29/VIM/RPS28/RPL36A/RPL38
GOCC_RNA_POLYMERASE_II_HOLOENZYME	GOCC_RNA_POLYMERASE_II_HOLOENZYME	73	0.399309	2.75167	1.25543e-09	1.00528e-07	7.98758e-08	2993	tags=37%, list=10%, signal=34%	GTF2A2/TAF7/GTF2H5/WDR61/POLR2B/TBPL1/MYO6/TAF2/POLR2J3/GTF2B/POLR2D/POLR2H/TAF10/LEO1/POLR2J2/POLR2F/MNAT1/GTF2E1/RPRD1A/POLR2L/CCNH/TAF12/TAF9/GTF2H3/POLR2I/POLR2G/TCEA1
GOBP_MUSCLE_CONTRACTION	GOBP_MUSCLE_CONTRACTION	332	-0.350653	-1.84762	1.28062e-09	1.00528e-07	7.98758e-08	3458	tags=23%, list=11%, signal=21%	PLCE1/MYBPC3/FXYD1/EDN1/PPP1R13L/CALCA/BDKRB2/P2RX6/TBX3/HTR2A/SLMAP/SORBS3/SULF2/RGS2/OXT/SSPN/STAC/GNAO1/ATP1A2/DYSF/P2RX2/SLC9A1/KCNB2/MYOCD/SCN2B/ACTG2/EDN2/KCNA5/SLC6A8/GJC1/MIR21/CKMT2/TPM1/CACNA1C/P2RX1/TBX2/ZC3H12A/SORBS1/RNF207/BIN1/VCL/CALD1/SGCA/KCNMA1/SRF/EDN3/DAPK3/CAV1/CD38/MYH3/TPM2/MYOF/STC1/MYLK/ACTC1/EDNRA/TLN1/ATP2B4/SYNM/CHGA/LTB4R/ACTA1/MYOM1/CACNA1H/CRYAB/SMTN/MYL9/LMOD1/GST…
GOCC_MEMBRANE_COAT	GOCC_MEMBRANE_COAT	83	0.36441	2.66389	1.28738e-09	1.00528e-07	7.98758e-08	3535	tags=39%, list=11%, signal=34%	SEC23B/AP1S1/PDCD6/AP3S1/SAR1B/TMED7/COPB2/SEC24D/CLINT1/COPZ1/CHMP1B/COPB1/COPE/AP2S1/CLTC/COPA/SEC13/KLHL12/TMED3/AP1M2/CHMP2A/NECAP1/ARCN1/SEC24A/AP3M1/AP3B1/PICALM/EPN3/AFTPH/AP3S2/AP1S2/CLTA
GOMF_TRANSLATION_FACTOR_ACTIVITY_RNA_BINDING	GOMF_TRANSLATION_FACTOR_ACTIVITY_RNA_BINDING	77	0.391627	2.77621	1.30209e-09	1.00528e-07	7.98758e-08	3882	tags=43%, list=12%, signal=38%	EEF1G/EIF3M/MCTS1/EIF3F/EIF3J/EEF1B2/COPS5/EIF2A/EIF2S3/EIF1B/EIF4H/EIF3CL/EIF3H/GSPT1/EIF3I/EIF2B2/EIF4G2/GFM1/TUFM/EIF1AY/EIF4E3/EIF3K/EIF4B/GSPT2/EIF1AX/EEF1A2/MTIF3/DHX29/CPEB4/EIF3L/EIF4A1/EIF2B1/EIF4E2
GOBP_BRANCHED_CHAIN_AMINO_ACID_METABOLIC_PROCESS	GOBP_BRANCHED_CHAIN_AMINO_ACID_METABOLIC_PROCESS	23	0.667355	3.38517	1.61471e-09	1.2318e-07	9.78742e-08	3494	tags=65%, list=11%, signal=58%	MCCC2/AUH/BCAT1/DLD/HSD17B10/ACAT1/MCCC1/BCAT2/HIBCH/HIBADH/ALDH6A1/ACAD8/SDSL/BCKDHB/IVD
GOCC_COPI_COATED_VESICLE_MEMBRANE	GOCC_COPI_COATED_VESICLE_MEMBRANE	16	0.794888	3.51844	1.78828e-09	1.34815e-07	1.07119e-07	2866	tags=69%, list=9%, signal=63%	KDELR2/TMED2/TMED7/KDELR3/COPB2/COPZ1/COPB1/COPE/COPA/TMED3/ARCN1
GOCC_VESICLE_COAT	GOCC_VESICLE_COAT	51	0.466202	2.86346	1.88338e-09	1.40334e-07	1.11504e-07	3535	tags=47%, list=11%, signal=42%	SEC23B/AP1S1/PDCD6/SAR1B/TMED7/COPB2/SEC24D/CLINT1/COPZ1/COPB1/COPE/AP2S1/CLTC/COPA/SEC13/KLHL12/TMED3/NECAP1/ARCN1/SEC24A/PICALM/EPN3/AFTPH/CLTA
GOCC_PROTEASOME_ACCESSORY_COMPLEX	GOCC_PROTEASOME_ACCESSORY_COMPLEX	24	0.660174	3.39935	2.69087e-09	1.98196e-07	1.5748e-07	4065	tags=62%, list=13%, signal=54%	PSMC4/PSMD6/PSMD10/PSMD14/PSMC2/PSME2/PSMC6/PSMD7/PSMD2/PSMD5/PSME3/ADRM1/PSMD13/PSMD4/PSMD8
GOCC_INTRINSIC_COMPONENT_OF_MITOCHONDRIAL_INNER_MEMBRANE	GOCC_INTRINSIC_COMPONENT_OF_MITOCHONDRIAL_INNER_MEMBRANE	40	0.508857	2.97102	3.31791e-09	2.41604e-07	1.9197e-07	3806	tags=50%, list=12%, signal=44%	APOO/COQ2/SCO2/TMEM177/SCO1/TIMM23/TMEM11/MTX2/MTX1/OXA1L/CCDC51/ETFDH/HSPA9/SLC25A3/CHCHD6/AGK/CHCHD3/GHITM/SFXN1/SAMM50
GOBP_SCF_DEPENDENT_PROTEASOMAL_UBIQUITIN_DEPENDENT_PROTEIN_CATABOLIC_PROCESS	GOBP_SCF_DEPENDENT_PROTEASOMAL_UBIQUITIN_DEPENDENT_PROTEIN_CATABOLIC_PROCESS	91	0.342563	2.53673	3.55777e-09	2.56159e-07	2.03536e-07	4142	tags=42%, list=13%, signal=36%	PSMC4/PSMA3/PSMD6/PSMA6/PSMD10/PSMA5/RBX1/PSMB5/PSMD14/FBXO6/PSMA1/PSMA4/PSMC2/FBXL17/PSMB4/PSME2/CUL5/PSMC6/PSMD7/PSMD2/PSMB2/FBXL5/PSMB7/PSMD5/PSMB1/PSMA2/PSME3/CUL4A/FBXL3/PSMB6/FBXL8/CUL2/PSMD13/CUL4B/PSMD4/PSMD8/PSMB9/FBXW11
GOCC_COPI_COATED_VESICLE	GOCC_COPI_COATED_VESICLE	26	0.638447	3.39462	3.68056e-09	2.62056e-07	2.08221e-07	3197	tags=65%, list=10%, signal=59%	TMED10/KDELR2/TMED2/TMED7/KDELR3/COPB2/COPZ1/COPB1/COPE/COPA/TMED3/USE1/SEC22B/ARCN1/ARF1/BNIP1/CCDC115
GOCC_EUKARYOTIC_TRANSLATION_INITIATION_FACTOR_3_COMPLEX	GOCC_EUKARYOTIC_TRANSLATION_INITIATION_FACTOR_3_COMPLEX	17	0.767343	3.41978	4.0429e-09	2.84691e-07	2.26206e-07	3750	tags=59%, list=12%, signal=52%	ABCE1/EIF3M/EIF3F/EIF3J/COPS5/EIF3CL/EIF3H/EIF3I/EIF3K/EIF3L
GOBP_INTERLEUKIN_1_MEDIATED_SIGNALING_PATHWAY	GOBP_INTERLEUKIN_1_MEDIATED_SIGNALING_PATHWAY	100	0.332322	2.68112	4.29836e-09	2.9939e-07	2.37885e-07	2867	tags=30%, list=9%, signal=27%	PSMC4/PSMA3/PSMD6/PSMA6/PSMD10/PSMA5/UBB/RIPK2/RBX1/UBE2N/PSMB5/PSMD14/PSMA1/PSMA4/PSMC2/PELI1/PSMB4/IRAK1/PSME2/PSMC6/PELI2/PSMD7/PSMD2/PSMB2/IL1R1/PSMB7/PSMD5/PSMB1/RPS27A/PSMA2
GOCC_OUTER_MITOCHONDRIAL_MEMBRANE_PROTEIN_COMPLEX	GOCC_OUTER_MITOCHONDRIAL_MEMBRANE_PROTEIN_COMPLEX	20	0.71037	3.39508	4.72333e-09	3.25452e-07	2.58593e-07	4548	tags=75%, list=14%, signal=64%	TOMM5/APOO/TOMM20/TOMM6/MTX2/MTX1/HSPA9/CHCHD6/CHCHD3/TOMM40/SAMM50/TOMM22/TOMM7/DNAJC11/IMMT
GOBP_PROTON_TRANSMEMBRANE_TRANSPORT	GOBP_PROTON_TRANSMEMBRANE_TRANSPORT	118	0.307185	2.67025	5.0535e-09	3.44498e-07	2.73726e-07	2639	tags=29%, list=8%, signal=26%	TMCO3/CYB5A/SLC33A1/COX7B/ATP6V1A/COX17/MFSD3/ATP2C1/COX6A1/COX7A2/COX8A/COX5A/ATP6V0B/COX6B1/COX7A2L/ATP6V1G1/ATP7A/SLC2A10/NDUFA4/ATP6V0E2/ATP6V0E1/SLC9A2/C15orf48/COX6C/PARK7/SLC9A9/COX7C/NDUFA4L2/SURF1/ATP6V0D1/SLC25A3/ATP6V1E2/SLC46A1/CLCN3
GOBP_REGULATION_OF_HEMATOPOIETIC_PROGENITOR_CELL_DIFFERENTIATION	GOBP_REGULATION_OF_HEMATOPOIETIC_PROGENITOR_CELL_DIFFERENTIATION	88	0.349168	2.54843	5.61997e-09	3.79082e-07	3.01206e-07	4196	tags=44%, list=13%, signal=39%	PSMC4/PSMA3/PSMD6/PSMA6/PSMD10/PSMA5/OCIAD2/PDCD2/PSMB5/PSMD14/PSMA1/PSMA4/DHX36/PSMC2/PSMB4/PSME2/PSMC6/PSMD7/PSMD2/PSMB2/YTHDF2/HSPA9/PSMB7/PSMD5/PSMB1/PSMA2/METTL3/METTL14/PSME3/PUS7/FNIP1/GATA2/PSMB6/LMO2/PSMD13/PSMD4/PSMD8/PSMB9/NUDT21
GOCC_PIGMENT_GRANULE	GOCC_PIGMENT_GRANULE	104	0.327817	2.68982	5.82457e-09	3.8879e-07	3.08919e-07	3676	tags=35%, list=12%, signal=31%	TMED10/SDCBP/PDIA6/RAN/RAB9A/RAB5A/GPNMB/HSPA8/AHCY/RAB2A/ERP29/SYPL1/FASN/CTSD/CLTC/YWHAZ/PRDX1/CANX/RAB5C/DNAJC5/RAB32/HSP90AB1/SEC22B/RAB17/CCT4/RPN1/TMEM33/HSP90B1/CALU/HSP90AA1/P4HB/SLC2A1/SND1/YWHAB/GNA13/ATP6V1B2
GOCC_RESPIRATORY_CHAIN_COMPLEX_IV	GOCC_RESPIRATORY_CHAIN_COMPLEX_IV	17	0.757922	3.3778	6.70784e-09	4.43133e-07	3.52098e-07	2001	tags=65%, list=6%, signal=61%	COX7B/UQCRFS1/COX6A1/COX8A/COX5A/COX6B1/NDUFA4/UQCRC2/C15orf48/COX7C/NDUFA4L2
GOCC_ACTIN_CYTOSKELETON	GOCC_ACTIN_CYTOSKELETON	463	-0.316669	-1.7026	6.78103e-09	4.43396e-07	3.52308e-07	3595	tags=21%, list=11%, signal=19%	KRT19/RGS22/ACTL7B/MYOZ2/SPRY2/SPTBN2/ANKRD23/SPTBN1/PJVK/CORO1C/KLHL14/EPHA3/FHL3/GBP1/CDC42BPA/SPTBN4/CROCC/AXL/MYO1F/CORO2B/BAG3/ROR1/PDLIM7/GJB6/PDLIM4/DLC1/DCDC2B/ACTG2/CNN2/MYOZ3/RARA/CGNL1/TTC17/MYO18A/ADAM17/TPM1/PKNOX2/MYO9A/APBB3/PALLD/PAK1/AKAP13/MPRIP/SPTAN1/SVIL/SORBS1/BIN1/VCL/CALD1/LPP/SHROOM1/DAPK3/SYNPO2/IPP/AUTS2/ASAP1/CDC42BPB/MYH3/TRIP6/TPM2/VILL/DPYSL3/ACTN4/DDR2/ZYX/FHOD3/MY…
GOBP_REGULATION_OF_HEMATOPOIETIC_STEM_CELL_DIFFERENTIATION	GOBP_REGULATION_OF_HEMATOPOIETIC_STEM_CELL_DIFFERENTIATION	73	0.382768	2.63769	7.03937e-09	4.55639e-07	3.62035e-07	4126	tags=47%, list=13%, signal=41%	PSMC4/PSMA3/PSMD6/PSMA6/PSMD10/PSMA5/OCIAD2/PSMB5/PSMD14/PSMA1/PSMA4/PSMC2/PSMB4/PSME2/PSMC6/PSMD7/PSMD2/PSMB2/YTHDF2/HSPA9/PSMB7/PSMD5/PSMB1/PSMA2/METTL3/PSME3/PUS7/GATA2/PSMB6/LMO2/PSMD13/PSMD4/PSMD8/PSMB9
GOBP_NUCLEOTIDE_EXCISION_REPAIR	GOBP_NUCLEOTIDE_EXCISION_REPAIR	102	0.322228	2.59735	9.23888e-09	5.92028e-07	4.70405e-07	3393	tags=36%, list=11%, signal=32%	RPA3/UBB/HMGN1/GTF2H5/COPS5/RBX1/COPS4/POLR2B/RFC4/RAD23B/POLR2D/POLR2H/PCNA/COPS3/POLR2F/MNAT1/COPS8/CETN2/POLR2L/CCNH/GTF2H3/SLC30A9/RPS27A/RPA1/POLR2I/CHD1L/POLR2G/PNKP/TCEA1/POLD2/PPIE/RPA2/SIRT1/ERCC1/CUL4A/POLR2K/RFC3
GOBP_GLYCOSYL_COMPOUND_METABOLIC_PROCESS	GOBP_GLYCOSYL_COMPOUND_METABOLIC_PROCESS	116	0.307826	2.64265	9.3981e-09	5.96267e-07	4.73774e-07	3717	tags=33%, list=12%, signal=29%	ENPP4/TK1/GMPS/PRPS1/RAN/HPRT1/UPRT/PPAT/GNMT/AHCY/APRT/AKR1C3/NME5/NME7/GLA/LCMT2/AKR1A1/ERH/GUSB/FUCA1/UCK2/GNAI3/NME1/FUCA2/APOBEC3B/CBR4/DCK/PRPSAP2/PRPS2/AKR7A2/TYW1/GMPR2/GUK1/NAGA/ENTPD7/IMPDH2/CASK/ABHD10
GOMF_DISULFIDE_OXIDOREDUCTASE_ACTIVITY	GOMF_DISULFIDE_OXIDOREDUCTASE_ACTIVITY	35	0.535618	2.97278	1.02289e-08	6.39943e-07	5.08477e-07	3645	tags=49%, list=12%, signal=43%	GLRX3/PDIA6/TXN/TXNL1/PDIA5/TXNDC17/SCO2/GLRX2/PTGES2/GLRX5/DNAJC10/PGK1/GSTO1/SH3BGRL3/TXNRD1/P4HB/CHCHD4
GOBP_VESICLE_TARGETING	GOBP_VESICLE_TARGETING	84	0.353669	2.55083	1.02862e-08	6.39943e-07	5.08477e-07	3238	tags=30%, list=10%, signal=27%	TMED10/BET1/STARD3NL/TMED2/F5/PDCD6/SAR1B/SEC24D/CLASP2/TRAPPC4/SNAP23/TMED9/USO1/SEC13/SEC23IP/KLHL12/AP1M2/NSF/LMAN1/SEC22B/TRAPPC5/GOSR1/SEC24A/MCFD2/ARFGAP3
GOBP_NUCLEOTIDE_SUGAR_METABOLIC_PROCESS	GOBP_NUCLEOTIDE_SUGAR_METABOLIC_PROCESS	33	0.534923	3.04483	1.05179e-08	6.48067e-07	5.14932e-07	3357	tags=52%, list=11%, signal=46%	GFPT1/SLC35A3/PGM3/GMDS/NANS/GNE/UAP1/UGDH/GMPPB/PMM1/MPI/GNPDA1/DPAGT1/GNPDA2/GNPNAT1/PMM2/EXTL2
GOBP_AMINO_ACID_ACTIVATION	GOBP_AMINO_ACID_ACTIVATION	28	0.600495	3.2103	1.06471e-08	6.49776e-07	5.1629e-07	10676	tags=96%, list=34%, signal=64%	PPA1/AIMP2/YARS2/IARS2/EEF1E1/NARS2/WARS2/DARS2/LARS2/EARS2/AASDH/FARSA/FARS2/MARS2/RARS2/VARS2/PARS2/SARS2/TARS2/GATC/CARS2/QRSL1/DALRD3/HARS2/AARSD1/PPA2/FARSB
GOCC_RNA_POLYMERASE_COMPLEX	GOCC_RNA_POLYMERASE_COMPLEX	98	0.325884	2.54318	1.20949e-08	7.31171e-07	5.80964e-07	2993	tags=33%, list=10%, signal=30%	GTF2A2/TAF7/POLR3K/GTF2H5/WDR61/POLR2B/TBPL1/MYO6/TAF2/POLR2J3/GTF2B/POLR2D/POLR2H/PRIM2/TAF10/LEO1/POLR2J2/POLR2F/MNAT1/GTF2E1/PRIM1/RPRD1A/POLR2L/CCNH/TAF12/TAF9/POLR3E/GTF2H3/POLR1C/POLR2I/POLR2G/TCEA1
GOBP_PEROXISOMAL_TRANSPORT	GOBP_PEROXISOMAL_TRANSPORT	70	0.382552	2.62189	1.39219e-08	8.33752e-07	6.62471e-07	3364	tags=36%, list=11%, signal=32%	SLC27A2/IDH1/HSD17B4/PEX7/AMACR/HACL1/ZFAND6/EHHADH/UBB/ACOT8/PEX10/CAT/GNPAT/IDE/MPV17/UBE2D3/ACAA1/PEX19/RPS27A/ACOT4/MLYCD/PEX1/PHYH/ACOT2/ECH1
GOMF_TRANSLATION_REGULATOR_ACTIVITY_NUCLEIC_ACID_BINDING	GOMF_TRANSLATION_REGULATOR_ACTIVITY_NUCLEIC_ACID_BINDING	97	0.333514	2.51524	1.4627e-08	8.67871e-07	6.89581e-07	3882	tags=40%, list=12%, signal=35%	EEF1G/EIF3M/MCTS1/EIF3F/EIF3J/EEF1B2/COPS5/EIF2A/EIF2S3/TYMS/C1QBP/EIF1B/EIF4H/EIF3CL/EIF3H/GSPT1/EIF3I/SHMT2/EIF2B2/EIF4G2/GFM1/TUFM/EIF1AY/EIF4E3/EIF3K/EIF4B/GSPT2/EIF1AX/EEF1A2/MTIF3/DHX29/MIF4GD/PAIP2/CPEB4/EIF3L/EIF4A1/EIF2B1/RPS27L/EIF4E2
GOBP_MITOCHONDRIAL_ELECTRON_TRANSPORT_CYTOCHROME_C_TO_OXYGEN	GOBP_MITOCHONDRIAL_ELECTRON_TRANSPORT_CYTOCHROME_C_TO_OXYGEN	16	0.755429	3.34378	1.85464e-08	1.09032e-06	8.66333e-07	1919	tags=62%, list=6%, signal=59%	COX7B/COX6A1/COX8A/COX5A/COX6B1/COX7A2L/COX5B/NDUFA4/COX6C/COX7C
GOBP_PROTEASOMAL_UBIQUITIN_INDEPENDENT_PROTEIN_CATABOLIC_PROCESS	GOBP_PROTEASOMAL_UBIQUITIN_INDEPENDENT_PROTEIN_CATABOLIC_PROCESS	22	0.651656	3.27317	2.02617e-08	1.18034e-06	9.37855e-07	3003	tags=55%, list=10%, signal=49%	PSMA3/PSMA6/PSMA5/PSMB5/PSMA1/PSMA4/PSMB4/PSMB2/PSMB7/PSMB1/PSMA2/ENC1
GOCC_CHAPERONE_COMPLEX	GOCC_CHAPERONE_COMPLEX	27	0.580024	3.1197	2.46853e-08	1.42508e-06	1.13232e-06	3002	tags=63%, list=10%, signal=57%	PTGES3/CCT2/HSPA8/CCT8/TCP1/CCT7/CCT6A/PSMG1/PSMG2/STUB1/SDF2/HSP90AB1/CCT5/CCT3/CCT4/PPP5C/CCT6B
GOMF_EXTRACELLULAR_MATRIX_STRUCTURAL_CONSTITUENT_CONFERRING_TENSILE_STRENGTH	GOMF_EXTRACELLULAR_MATRIX_STRUCTURAL_CONSTITUENT_CONFERRING_TENSILE_STRENGTH	40	-0.599739	-2.40292	2.66202e-08	1.52306e-06	1.21017e-06	4552	tags=65%, list=15%, signal=56%	COL4A3/COL28A1/COL14A1/COL9A1/COL9A3/COL4A4/COL4A1/COL24A1/COL21A1/COL19A1/COL8A2/COL27A1/COL5A3/COL4A6/COL6A3/COL4A5/COL4A2/COL5A1/COL18A1/COL13A1/COL23A1/COL6A2/COL17A1/COL16A1/COL6A1/COL7A1
GOBP_TELOMERE_ORGANIZATION	GOBP_TELOMERE_ORGANIZATION	135	0.28028	2.5312	2.88485e-08	1.63594e-06	1.29986e-06	3393	tags=33%, list=11%, signal=29%	MYC/PTGES3/RPA3/CCT2/NHP2/APEX1/NSMCE2/CCT8/TELO2/TCP1/CCT7/XRCC5/CCT6A/NOP10/RFC4/GNL3/TPRKB/TINF2/POLE4/DHX36/PCNA/PRIM2/AURKB/POLE3/RAD51C/HNRNPA1/FEN1/PRIM1/HSP90AB1/CCT5/MAPKAPK5/DKC1/CCT3/CCT4/RPA1/PNKP/POLD2/GAR1/NBN/RPA2/ERCC1/HSP90AA1/CCNE2/RFC3
GOBP_REGULATION_OF_MITOCHONDRIAL_GENE_EXPRESSION	GOBP_REGULATION_OF_MITOCHONDRIAL_GENE_EXPRESSION	21	0.669323	3.2649	3.0595e-08	1.71976e-06	1.36646e-06	10394	tags=100%, list=33%, signal=67%	FASTKD2/C1QBP/FASTKD3/SHMT2/MRPS27/RMND1/NGRN/MPV17L2/TACO1/TRUB2/PRKAA1/LRPPRC/TSFM/CDK5RAP1/RPUSD4/RPUSD3/MTG1/NSUN3/ALKBH1/CHCHD10/METTL4
GOBP_NEGATIVE_REGULATION_OF_CELL_CYCLE_G2_M_PHASE_TRANSITION	GOBP_NEGATIVE_REGULATION_OF_CELL_CYCLE_G2_M_PHASE_TRANSITION	98	0.316824	2.47248	3.51132e-08	1.95657e-06	1.55462e-06	3350	tags=32%, list=11%, signal=28%	PSMC4/PSMA3/PSMD6/PSMA6/AURKA/PSMD10/CHMP4C/PSMA5/RBX1/PSMB5/PSMD14/BRCC3/PSMA1/PSMA4/PSMC2/AURKB/PSMB4/PSME2/PSMC6/PSMD7/PSMD2/PSMB2/AVEN/PSMB7/PSMD5/PSMB1/PSMA2/PSME3/NBN/CHEK1/NAE1
GOMF_LIGASE_ACTIVITY	GOMF_LIGASE_ACTIVITY	115	0.293705	2.43166	3.66441e-08	2.02427e-06	1.60842e-06	3549	tags=30%, list=11%, signal=27%	MCCC2/SLC27A2/ACSM1/GMPS/UBA3/ATP6V1A/ACSL1/PCCB/AACS/SUCLG2/YARS2/UBA5/IARS2/PPCS/ASNSD1/SUCLA2/MCCC1/ACSL3/MTHFS/UBA6/TRIM25/NARS2/WARS2/DARS2/SLC27A5/SAE1/UBA2/LARS2/GART/MTHFD1/NAE1/EARS2/SUCLG1/PAICS/ACSM3
GOBP_ANTIGEN_PROCESSING_AND_PRESENTATION_OF_PEPTIDE_OR_POLYSACCHARIDE_ANTIGEN_VIA_MHC_CLASS_II	GOBP_ANTIGEN_PROCESSING_AND_PRESENTATION_OF_PEPTIDE_OR_POLYSACCHARIDE_ANTIGEN_VIA_MHC_CLASS_II	100	0.313551	2.52968	3.79171e-08	2.07669e-06	1.65007e-06	3990	tags=38%, list=13%, signal=33%	HLA-DRB1/HLA-DRB5/AP1S1/HLA-DQA1/SAR1B/SEC24D/DYNLL1/FCER1G/HLA-DRA/ACTR10/CTSD/AP2S1/RACGAP1/CLTC/DYNC1I2/LGMN/HLA-DPA1/SEC13/CANX/HLA-DRB4/AP1M2/HLA-DRB3/KIF4A/KIF22/KIF3B/SEC24A/KIF11/ARF1/ACTR1B/CTSS/DCTN6/AP1S2/CLTA/IFI30/HLA-DPB1/AP1G1/DCTN3/KIFAP3
GOBP_PROTEIN_LOCALIZATION_TO_NUCLEOPLASM	GOBP_PROTEIN_LOCALIZATION_TO_NUCLEOPLASM	12	0.826678	3.2064	4.04035e-08	2.19412e-06	1.74337e-06	2743	tags=75%, list=9%, signal=68%	CCT2/CCT8/TCP1/CCT7/CCT6A/CCT5/DKC1/CCT3/CCT4
GOBP_PROTEIN_TARGETING_TO_MITOCHONDRION	GOBP_PROTEIN_TARGETING_TO_MITOCHONDRION	90	0.327169	2.41185	5.0095e-08	2.69755e-06	2.14339e-06	3958	tags=44%, list=13%, signal=39%	TOMM5/DNAJC19/PDCD5/TOMM20/MIPEP/PMPCB/IMMP2L/SH3GLB1/HAX1/TIMM23/UBL5/ROMO1/HTRA2/GRPEL2/TIMM9/FIS1/LMAN1/TSPO/UBE2D3/GRPEL1/SAE1/HSPD1/AGK/HSP90AA1/PINK1/TOMM40/MFF/ABLIM3/BCAP31/HSPA4/CHCHD4/TIMM10/TIMM8B/SLC25A6/SIRT4/SAMM50/AIFM1/IMMP1L/TOMM22/PARL
GOBP_GPI_ANCHOR_METABOLIC_PROCESS	GOBP_GPI_ANCHOR_METABOLIC_PROCESS	29	0.566335	3.08236	5.15353e-08	2.75198e-06	2.18663e-06	2927	tags=52%, list=9%, signal=47%	PIGK/GPAA1/PIGH/PIGP/PIGY/PIGB/PIGF/DPM1/PIGC/DPM3/PIGM/PIGW/PIGT/PIGO/PIGG
GOCC_AZUROPHIL_GRANULE_LUMEN	GOCC_AZUROPHIL_GRANULE_LUMEN	85	0.337136	2.44116	5.22845e-08	2.76892e-06	2.20009e-06	2430	tags=26%, list=8%, signal=24%	LYZ/SDCBP/HEBP2/GCA/C6orf120/CCT2/TXNDC5/CCT8/CREG1/ACLY/ACTR10/TUBB/FTL/GLA/PTGES2/GRN/FABP5/ACTR2/GUSB/FUCA1/FUCA2/GLB1
GOMF_CATALYTIC_ACTIVITY_ACTING_ON_A_TRNA	GOMF_CATALYTIC_ACTIVITY_ACTING_ON_A_TRNA	85	0.336883	2.43933	5.28153e-08	2.7741e-06	2.20421e-06	12428	tags=87%, list=40%, signal=53%	PTRH1/POP7/RPP40/YARS2/IARS2/LCMT2/POP4/BCDIN3D/THUMPD3/NARS2/CDKAL1/WARS2/DARS2/METTL6/FTSJ1/RPP21/DTD1/PTRH2/LARS2/TRMT5/TSEN34/TYW1/NSUN2/EARS2/DUS4L/TRMT12/DUS3L/METTL1/FARSA/TRPT1/DUS1L/FARS2/RPP25/MARS2/RARS2/PSTK/POP1/POP5/PUS3/FTO/MTFMT/VARS2/DTWD1/TYW1B/ALKBH8/TRNT1/PARS2/LRRC47/SARS2/NSUN3/TRDMT1/TARS2/WDR4/GATC/CARS2/QRSL1/TRMT11/ALKBH1/TARBP1/TRMT6/DALRD3/TRIT1/HARS2/TRMT2B/RPP38/AARS…
GOMF_OXIDOREDUCTASE_ACTIVITY_ACTING_ON_CH_OH_GROUP_OF_DONORS	GOMF_OXIDOREDUCTASE_ACTIVITY_ACTING_ON_CH_OH_GROUP_OF_DONORS	127	0.282185	2.33823	5.38103e-08	2.80339e-06	2.22748e-06	3170	tags=30%, list=10%, signal=27%	ABCC4/SORD/HSD17B6/PTGR1/IDH1/HSD17B4/HSD17B11/VKORC1L1/HPGD/PGD/EHHADH/CBR3/ME2/MDH1/HSD17B10/FASN/AKR1C3/HADHB/RDH14/UGDH/HADH/GRHPR/AKR1A1/CBR1/RDH11/LDHA/VKORC1/HSD17B8/CBR4/UEVLD/HSD17B1/CRYL1/HSD17B12/MDH2/RDH12/HIBADH/AKR7A2/ADH5
GOBP_PROTEIN_LOCALIZATION_TO_NUCLEAR_BODY	GOBP_PROTEIN_LOCALIZATION_TO_NUCLEAR_BODY	11	0.854258	3.18548	5.49818e-08	2.84132e-06	2.25761e-06	2743	tags=82%, list=9%, signal=75%	CCT2/CCT8/TCP1/CCT7/CCT6A/CCT5/DKC1/CCT3/CCT4
GOCC_COLLAGEN_TRIMER	GOCC_COLLAGEN_TRIMER	85	-0.476733	-2.17618	5.88584e-08	3.01331e-06	2.39427e-06	4596	tags=39%, list=15%, signal=33%	C1QTNF2/GLDN/COL4A4/COL4A1/COL24A1/COL21A1/COL19A1/COL8A2/C1QTNF7/EMID1/COLQ/COL27A1/COL5A3/COL4A6/C1QTNF1/SFTPD/SCARA3/COL6A3/COL4A5/COL4A2/ADIPOQ/COL5A1/COL18A1/COL13A1/COL23A1/COL6A2/COL22A1/CCBE1/EMILIN1/COL17A1/COL16A1/COL6A1/COL7A1
GOBP_MUSCLE_ORGAN_DEVELOPMENT	GOBP_MUSCLE_ORGAN_DEVELOPMENT	292	-0.33896	-1.76692	5.92505e-08	3.01331e-06	2.39427e-06	3708	tags=24%, list=12%, signal=21%	COL19A1/SMO/LAMA5/PITX1/MYBPC3/CNTFR/SPEG/MYOZ2/FOXC2/DDX17/JPH2/FHL3/STRA6/ANKRD1/BTG2/POU4F1/ELN/ZFPM2/HLF/HOXD9/BCL9L/P2RX2/MYOCD/KLF5/CTF1/CREB1/EPHB1/TPM1/FKTN/EID2B/BCL2/FOXO4/POU6F1/KCNAB1/ITGA7/SVIL/SGCA/COL6A3/DLL1/EFEMP2/ATF3/WNT3A/ZFHX3/HBEGF/CAV1/MKX/MYH3/GPC1/SMAD3/ISL1/FHL1/NOTCH1/MYLK/ACTC1/EGR1/MAFF/FOXC1/SOX15/HOXD10/BIN3/CFLAR/ACTA1/MYOM1/CACNA1H/CRYAB/POPDC2/SMTN/FOS/TGFBR3/LMO…
GOCC_CELL_SUBSTRATE_JUNCTION	GOCC_CELL_SUBSTRATE_JUNCTION	403	-0.315573	-1.68239	6.02991e-08	3.02832e-06	2.4062e-06	2489	tags=18%, list=8%, signal=16%	PPFIBP1/CORO2B/SORBS3/EPHA2/FERMT1/FHL2/PTK7/LRP1/PDLIM7/DLC1/RRAS/SLC9A1/MRC2/TGM2/CNN2/ADAM17/MSN/EVL/INPP5E/MCAM/EFS/PALLD/PAK1/MPRIP/ASAP3/SVIL/TNC/SORBS1/MTF2/VCL/GIT1/LPP/CLASP1/ITGB4/SYNPO2/ITGA3/CAV1/RHOB/ARHGEF2/TRIP6/ENAH/RND3/ACTN4/DDR2/FES/ZYX/FHL1/CSRP1/ACTC1/TLN1/CSPG4/ZNF185/NEXN/ACTN1/FLRT3/FERMT2/TGFB1I1/PIP5K1C/PGM5/COL17A1/STARD8/LIMS2/TLE2/TNS1/FAM107A/CNN1/SHROOM4/ITGA5/FLNA/…
GOMF_METAL_CLUSTER_BINDING	GOMF_METAL_CLUSTER_BINDING	63	0.379985	2.50981	6.04908e-08	3.02832e-06	2.4062e-06	3202	tags=37%, list=10%, signal=33%	GLRX3/UQCRFS1/PPAT/ISCA1/SDHB/GLRX2/ACO2/CIAPIN1/CISD2/PRIM2/GLRX5/NFU1/NUBP2/BOLA2/IREB2/CDKAL1/ETFDH/RPS3/KIF4A/NDUFV2/NDUFV1/FDX1/TYW1
GOBP_REGULATION_OF_ESTABLISHMENT_OF_PROTEIN_LOCALIZATION_TO_CHROMOSOME	GOBP_REGULATION_OF_ESTABLISHMENT_OF_PROTEIN_LOCALIZATION_TO_CHROMOSOME	10	0.889632	3.2217	7.46791e-08	3.70964e-06	2.94756e-06	2743	tags=90%, list=9%, signal=82%	CCT2/CCT8/TCP1/CCT7/CCT6A/CCT5/DKC1/CCT3/CCT4
GOCC_TRANSLATION_PREINITIATION_COMPLEX	GOCC_TRANSLATION_PREINITIATION_COMPLEX	18	0.695302	3.22881	8.45005e-08	4.16522e-06	3.30954e-06	4783	tags=78%, list=15%, signal=66%	EIF3M/EIF3F/EIF3J/EIF1B/EIF3CL/EIF3H/EIF3I/EIF3K/DHX29/EIF3L/EIF1/EIF3D/EIF3E/EIF3G
GOBP_VESICLE_BUDDING_FROM_MEMBRANE	GOBP_VESICLE_BUDDING_FROM_MEMBRANE	103	0.301852	2.44114	9.133e-08	4.4675e-06	3.54972e-06	3238	tags=28%, list=10%, signal=25%	TMED10/SEC23B/BET1/CHMP5/GOLPH3/TMED2/F5/PDCD6/SAR1B/CHMP4C/SEC24D/TRAPPC4/TMED9/USO1/GOLPH3L/SEC13/FNBP1L/SEC23IP/KLHL12/NSF/LMAN1/SEC22B/TRAPPC5/SEC24A/ARF1/AP3B1/MCFD2/PICALM/ARFGAP3
GOCC_LUMENAL_SIDE_OF_MEMBRANE	GOCC_LUMENAL_SIDE_OF_MEMBRANE	34	0.512535	2.91812	9.44168e-08	4.57146e-06	3.63233e-06	2307	tags=32%, list=7%, signal=30%	HLA-DRB1/HLA-DRB5/HLA-DQA1/SPPL2A/DNAJC19/HSPA8/HLA-DRA/HLA-DPA1/CANX/HLA-DRB4/HLA-DRB3
GOMF_TRANSLATION_REGULATOR_ACTIVITY	GOMF_TRANSLATION_REGULATOR_ACTIVITY	125	0.274915	2.284	9.48821e-08	4.57146e-06	3.63233e-06	3882	tags=39%, list=12%, signal=34%	EEF1G/EIF3M/MCTS1/EIF3F/EIF3J/EEF1B2/COPS5/EIF2A/EIF2S3/TYMS/C1QBP/EIF1B/RPL22/CNBP/EIF4H/RPS9/EIF3CL/EIF2AK3/EIF3H/GSPT1/EIF3I/SHMT2/EIF2B2/EIF4G2/IREB2/EIF4A3/RPS14/GFM1/TUFM/EIF1AY/EIF4E3/EIF3K/EIF4B/GSPT2/EIF1AX/EEF1A2/MTIF3/CIRBP/CYFIP1/EIF4EBP2/DHX29/MIF4GD/PAIP2/CPEB4/EIF3L/EIF4A1/EIF2B1/RPS27L/EIF4E2
GOBP_PROTEIN_TRANSMEMBRANE_TRANSPORT	GOBP_PROTEIN_TRANSMEMBRANE_TRANSPORT	55	0.414269	2.69008	9.89188e-08	4.73039e-06	3.7586e-06	3879	tags=40%, list=12%, signal=35%	TMED10/PEX7/SEC61G/DNAJC19/HSPA8/SEC61B/TOMM20/SRP54/TRAM1/PEX10/TIMM23/ROMO1/TRAM2/GRPEL2/ABCA1/GRPEL1/HSPD1/PEX1/TOMM40/CHCHD4/AIFM1/TOMM22
GOBP_MATURATION_OF_LSU_RRNA	GOBP_MATURATION_OF_LSU_RRNA	26	0.590216	3.13818	1.07522e-07	5.10372e-06	4.05524e-06	3923	tags=54%, list=12%, signal=47%	NHP2/WDR12/RPL7/RPL10A/ZNHIT3/RPF1/RPL7A/RRP15/MRPL1/NSA2/GTPBP4/BOP1/DDX18/MAK16
GOBP_MONOCARBOXYLIC_ACID_CATABOLIC_PROCESS	GOBP_MONOCARBOXYLIC_ACID_CATABOLIC_PROCESS	121	0.280668	2.46182	1.14313e-07	5.38616e-06	4.27966e-06	2459	tags=26%, list=8%, signal=24%	SORD/SLC27A2/ETFA/AUH/HSD17B4/MCEE/PEX7/PCCB/ABHD3/AIG1/AMACR/PGD/HACL1/EHHADH/ACOT8/HSD17B10/ACADM/ACADL/HADHB/DECR1/CPT2/SLC25A17/HADH/ACAT1/AKR1A1/ABHD2/MCAT/ECHS1/ETFDH/CYP4F11/ACAT2/ACAA1
GOBP_FATTY_ACID_CATABOLIC_PROCESS	GOBP_FATTY_ACID_CATABOLIC_PROCESS	98	0.305852	2.38686	1.24386e-07	5.81799e-06	4.62278e-06	2459	tags=29%, list=8%, signal=26%	SLC27A2/ETFA/AUH/HSD17B4/MCEE/PEX7/PCCB/ABHD3/AIG1/AMACR/HACL1/EHHADH/ACOT8/HSD17B10/ACADM/ACADL/HADHB/DECR1/CPT2/SLC25A17/HADH/ACAT1/ABHD2/MCAT/ECHS1/ETFDH/ACAT2/ACAA1
GOCC_PRERIBOSOME	GOCC_PRERIBOSOME	67	0.354375	2.3598	1.3231e-07	6.14379e-06	4.88164e-06	4025	tags=37%, list=13%, signal=33%	RPS7/WDR12/EBNA1BP2/HEATR1/XRCC5/RIOK2/RRS1/RPF1/NIP7/RRP15/IMP3/BYSL/NSA2/UTP18/KRR1/ZNF622/RRP9/RIOK3/BOP1/UTP6/NGDN/NOB1/MAK16/RRP1B/WDR37
GOBP_POSITIVE_REGULATION_OF_EXTRACELLULAR_MATRIX_ORGANIZATION	GOBP_POSITIVE_REGULATION_OF_EXTRACELLULAR_MATRIX_ORGANIZATION	19	-0.740955	-2.46974	1.3845e-07	6.38263e-06	5.07142e-06	1297	tags=53%, list=4%, signal=50%	SOX9/CLASP1/EFEMP2/PDPN/DDR2/SMAD3/EMILIN1/CFLAR/PHLDB1/IL6
GOCC_GOLGI_ASSOCIATED_VESICLE	GOCC_GOLGI_ASSOCIATED_VESICLE	86	0.328373	2.39797	1.40856e-07	6.44717e-06	5.1227e-06	3694	tags=37%, list=12%, signal=33%	TMED10/KDELR2/AP1S1/TMED2/TMED7/SPPL2A/KDELR3/COPB2/COPZ1/COPB1/COPE/TMED9/ATP7A/CLTC/COPA/GPR89A/ADAM10/STEAP2/TMED3/USE1/SEC22B/OCRL/ARCN1/ARF1/BNIP1/ITM2B/CCDC115/AFTPH/APP/CLTA/MAP6D1/TMEM199
GOCC_PROTEASOME_CORE_COMPLEX	GOCC_PROTEASOME_CORE_COMPLEX	20	0.650424	3.10858	1.6491e-07	7.49462e-06	5.95497e-06	2867	tags=55%, list=9%, signal=50%	PSMA3/PSMA6/PSMA5/PSMB5/PSMA1/PSMA4/PSMB4/PSMB2/PSMB7/PSMB1/PSMA2
GOBP_VIRION_ASSEMBLY	GOBP_VIRION_ASSEMBLY	38	0.475347	2.8049	1.66382e-07	7.50828e-06	5.96583e-06	3014	tags=37%, list=10%, signal=33%	CHMP5/CHMP2B/APOE/CHMP4C/PPIA/SPCS1/UBB/CHMP3/TSG101/CHMP1B/VPS4B/CHMP2A/RPS27A/VTA1
GOBP_RESPONSE_TO_CORTICOSTEROID	GOBP_RESPONSE_TO_CORTICOSTEROID	149	-0.402976	-1.98384	1.74759e-07	7.83114e-06	6.22236e-06	2262	tags=22%, list=7%, signal=21%	PAPPA/OXT/SLIT3/HSD11B2/BCL2/GNRH1/DDIT4/NPAS4/MAOB/ALDH3A1/DUSP1/ADIPOQ/SLIT2/FOXO1/FOSL1/ERRFI1/STC1/ISL1/NOTCH1/SERPINF1/SGK1/GSTP1/SCNN1G/IL10/ZFP36/CFLAR/HNRNPU/FOS/IL6/FAM107A/SCGB1A1/SSTR2/FOSB
GOBP_SMOOTH_MUSCLE_CONTRACTION	GOBP_SMOOTH_MUSCLE_CONTRACTION	93	-0.45281	-2.09722	1.97592e-07	8.79285e-06	6.9865e-06	3458	tags=32%, list=11%, signal=29%	PLCE1/EDN1/CALCA/BDKRB2/TBX3/HTR2A/SULF2/RGS2/OXT/ATP1A2/P2RX2/KCNB2/MYOCD/EDN2/MIR21/P2RX1/TBX2/KCNMA1/SRF/EDN3/DAPK3/CAV1/CD38/MYLK/EDNRA/ATP2B4/SMTN/CNN1/MYH11/SSTR2
GOBP_RIBOSOMAL_SMALL_SUBUNIT_ASSEMBLY	GOBP_RIBOSOMAL_SMALL_SUBUNIT_ASSEMBLY	18	0.671387	3.11775	2.07049e-07	9.15014e-06	7.27039e-06	7233	tags=94%, list=23%, signal=73%	XRCC5/RPS5/MRPS7/MRPS11/RPS15/RPS14/RPS28/RPSA/RPL38/RPS27L/RPS27/ERAL1/RPS10/PWP2/RPS19/ABT1/PRKDC
GOBP_VESICLE_TARGETING_TO_FROM_OR_WITHIN_GOLGI	GOBP_VESICLE_TARGETING_TO_FROM_OR_WITHIN_GOLGI	68	0.358155	2.4387	2.12205e-07	9.31378e-06	7.40041e-06	4010	tags=38%, list=13%, signal=33%	TMED10/BET1/TMED2/F5/PDCD6/SAR1B/SEC24D/TRAPPC4/TMED9/USO1/SEC13/SEC23IP/KLHL12/NSF/LMAN1/SEC22B/TRAPPC5/GOSR1/SEC24A/MCFD2/ARFGAP3/PREB/WIPI1/TFG/PPP6C/CTSC
GOCC_LATE_ENDOSOME_MEMBRANE	GOCC_LATE_ENDOSOME_MEMBRANE	118	0.28022	2.43586	2.32041e-07	1.01151e-05	8.03711e-06	3467	tags=29%, list=11%, signal=26%	HLA-DRB1/HLA-DRB5/STARD3NL/VAMP7/CHMP2B/SPPL2A/LAMP2/CHMP4C/CHMP3/TSG101/HLA-DRA/CHMP1B/MITD1/MCOLN2/TMEM106B/VPS4B/NDFIP2/TMEM9/ARL8B/SLC9A9/TMEM59/HLA-DRB4/LITAF/HLA-DRB3/TMEM165/STX8/CLCN3/CHMP2A/LAPTM4A/SCARB2/MMD/UBXN6/RNF13/SLC1A1
GOBP_LATE_ENDOSOME_TO_VACUOLE_TRANSPORT	GOBP_LATE_ENDOSOME_TO_VACUOLE_TRANSPORT	23	0.590983	2.99777	2.67896e-07	1.15992e-05	9.21632e-06	3095	tags=57%, list=10%, signal=51%	CHMP5/CHMP2B/CHMP4C/CHMP3/VPS25/CHMP1B/PIK3R4/BECN1/STAM/CHMP2A/LEPROTL1/VTA1/TMEM50A
GOCC_MITOCHONDRIAL_RESPIRATORY_CHAIN_COMPLEX_IV	GOCC_MITOCHONDRIAL_RESPIRATORY_CHAIN_COMPLEX_IV	11	0.822927	3.06865	2.73255e-07	1.17518e-05	9.33759e-06	2001	tags=73%, list=6%, signal=68%	UQCRFS1/COX6A1/COX5A/NDUFA4/UQCRC2/C15orf48/COX7C/NDUFA4L2
GOBP_CHAPERONE_MEDIATED_PROTEIN_COMPLEX_ASSEMBLY	GOBP_CHAPERONE_MEDIATED_PROTEIN_COMPLEX_ASSEMBLY	21	0.630248	3.0743	2.95111e-07	1.26072e-05	1.00172e-05	3610	tags=62%, list=12%, signal=55%	PTGES3/CCT2/NDUFAF1/BBS10/PSMG1/PSMG2/STUB1/PSMG3/HSP90AB1/PFDN6/HSPD1/HSP90AA1/HSPA4
GOBP_POSITIVE_REGULATION_OF_MITOCHONDRIAL_TRANSLATION	GOBP_POSITIVE_REGULATION_OF_MITOCHONDRIAL_TRANSLATION	11	0.814934	3.03884	3.49007e-07	1.48108e-05	1.17682e-05	4206	tags=73%, list=13%, signal=63%	FASTKD2/C1QBP/FASTKD3/MRPS27/RMND1/NGRN/MPV17L2/TRUB2
GOBP_CELL_MATRIX_ADHESION	GOBP_CELL_MATRIX_ADHESION	217	-0.359067	-1.82213	3.71412e-07	1.56579e-05	1.24413e-05	3229	tags=24%, list=10%, signal=22%	ITGA2B/S100A10/PPFIA2/CORO1C/EPHA3/VWA2/CORO2B/FERMT1/LRP1/DLC1/RRAS/TNN/SLC9A1/VEGFA/COL5A3/PPM1F/MUC4/CEACAM6/LYVE1/FBLN5/BCL2/ITGA7/SORBS1/VCL/CLASP1/SRF/EFEMP2/ITGB4/DAPK3/THBS3/ITGA3/ITGA10/TRIP6/COL13A1/ZYX/SMAD3/JAM3/SEMA3E/ACTN1/BCL6/EMILIN1/FERMT2/SERPINE1/CCL21/CX3CL1/PKD1/MSLN/COL17A1/ADAMTS9/COL16A1/FAM107A/ITGA8
GOMF_INTRAMOLECULAR_OXIDOREDUCTASE_ACTIVITY	GOMF_INTRAMOLECULAR_OXIDOREDUCTASE_ACTIVITY	46	0.428372	2.49992	3.84884e-07	1.61198e-05	1.28083e-05	3592	tags=50%, list=11%, signal=44%	PIGK/PDIA6/ENOPH1/PTGES3/PDIA5/EHHADH/TXNDC5/MIF/DDT/GLRX2/EBPL/PTGES2/EBP/TPI1/MPI/TMX3/GPI/GNPDA1/GNPDA2/ECH1/P4HB/CRELD2/IDI1
GOBP_RNA_DEPENDENT_DNA_BIOSYNTHETIC_PROCESS	GOBP_RNA_DEPENDENT_DNA_BIOSYNTHETIC_PROCESS	64	0.35036	2.34097	4.34081e-07	1.80623e-05	1.43517e-05	3077	tags=36%, list=10%, signal=32%	PTGES3/CCT2/NHP2/PPIA/CCT8/TELO2/TCP1/CCT7/XRCC5/CCT6A/NOP10/TINF2/AURKB/HNRNPA1/HSP90AB1/CCT5/MAPKAPK5/DKC1/CCT3/CCT4/RPA1/PNKP/GAR1
GOMF_PRENYLTRANSFERASE_ACTIVITY	GOMF_PRENYLTRANSFERASE_ACTIVITY	17	0.672744	2.99819	4.56559e-07	1.8875e-05	1.49975e-05	10284	tags=100%, list=33%, signal=67%	COQ2/RABGGTB/UBIAD1/PDSS2/RABGGTA/FNTA/NUS1/FDFT1/GGPS1/PDSS1/PGGT1B/PTAR1/FDPS/DHDDS/COX10/FNTB/CHM
GOBP_REGULATION_OF_DNA_TEMPLATED_TRANSCRIPTION_IN_RESPONSE_TO_STRESS	GOBP_REGULATION_OF_DNA_TEMPLATED_TRANSCRIPTION_IN_RESPONSE_TO_STRESS	111	0.280762	2.29613	5.4203e-07	2.22649e-05	1.76909e-05	2867	tags=26%, list=9%, signal=24%	PSMC4/PSMA3/NCK1/PSMD6/PSMA6/PSMD10/PSMA5/UBB/RBX1/PSMB5/PSMD14/HIGD1A/PSMA1/PSMA4/PSMC2/PSMB4/CITED2/PSME2/PSMC6/PSMD7/PSMD2/PSMB2/PSMB7/HIF1A/PSMD5/PSMB1/RPS27A/EGLN1/PSMA2
GOBP_ACTOMYOSIN_STRUCTURE_ORGANIZATION	GOBP_ACTOMYOSIN_STRUCTURE_ORGANIZATION	183	-0.373582	-1.87068	5.58804e-07	2.28078e-05	1.81223e-05	8196	tags=40%, list=26%, signal=30%	EPB41L1/NRAP/MYPN/CFL2/MIR138-1/ARHGAP6/MIR1-1/CUL3/PDGFRA/PTK2B/SDC4/EPB41L2/MYH6/ALMS1/CCDC88A/CAPN3/TMOD1/CDC42BPG/ARRB1/FRMD6/KCTD13/SFRP1/EPB41L5/APOA1/FHDC1/OBSL1/BAG4/KRT19/LIMK1/MYOZ2/EDN1/S100A10/ANKRD1/CDC42BPA/ELN/ARAP1/CORO2B/SORBS3/DLC1/SLC9A1/ARHGEF10/CNN2/CGNL1/PPM1F/MIR21/MYO18A/TPM1/EVL/PAK1/AKAP13/ASAP3/OBSCN/SORBS1/LPAR1/CLASP1/SRF/CDC42BPB/MYH3/ZYX/FHOD3/SMAD3/CSRP1/ACTC1/CFLA…
GOBP_NUCLEOTIDE_EXCISION_REPAIR_DNA_INCISION	GOBP_NUCLEOTIDE_EXCISION_REPAIR_DNA_INCISION	38	0.460199	2.71552	5.77937e-07	2.33371e-05	1.85429e-05	11747	tags=92%, list=37%, signal=58%	RPA3/UBB/GTF2H5/RBX1/RFC4/PCNA/GTF2H3/RPS27A/RPA1/CHD1L/POLD2/RPA2/ERCC1/CUL4A/RFC3/CUL4B/RFC5/POLD4/OGG1/UBC/ERCC3/RFC2/GTF2H2/ERCC4/POLD3/GTF2H1/PARP1/UBA52/GTF2H4/DDB2/POLD1/NTHL1/RFC1/XPA/DDB1
GOBP_REGULATION_OF_PROTEIN_LOCALIZATION_TO_CHROMOSOME_TELOMERIC_REGION	GOBP_REGULATION_OF_PROTEIN_LOCALIZATION_TO_CHROMOSOME_TELOMERIC_REGION	12	0.77221	2.99514	5.79058e-07	2.33371e-05	1.85429e-05	2743	tags=83%, list=9%, signal=76%	CCT2/CCT8/TCP1/CCT7/CCT6A/GNL3/CCT5/DKC1/CCT3/CCT4
GOBP_NUCLEOSIDE_MONOPHOSPHATE_METABOLIC_PROCESS	GOBP_NUCLEOSIDE_MONOPHOSPHATE_METABOLIC_PROCESS	67	0.33883	2.25628	6.11313e-07	2.44831e-05	1.94534e-05	3664	tags=34%, list=12%, signal=30%	TK1/GMPS/PRPS1/CMPK1/HPRT1/UPRT/PPAT/APRT/DCTD/ADSL/TYMS/DUT/AK2/UCK2/DCK/PRPS2/GART/GMPR2/GUK1/NUDT2/PAICS/IMPDH2/CASK
GOMF_NAD_BINDING	GOMF_NAD_BINDING	51	0.394464	2.42284	6.31965e-07	2.5153e-05	1.99857e-05	3787	tags=41%, list=12%, signal=36%	SORD/IDH1/ALDH1A3/HPGD/AHCY/ME2/DLD/QDPR/UGDH/HADH/ALDH1A1/GRHPR/LDHA/HSD17B8/CRYL1/HIBADH/NDUFV1/SIRT1/SIRT2/SIRT4/NDUFS2
GOCC_ORGANELLE_ENVELOPE_LUMEN	GOCC_ORGANELLE_ENVELOPE_LUMEN	78	0.329973	2.35766	6.4177e-07	2.52798e-05	2.00865e-05	4051	tags=44%, list=13%, signal=38%	GOLPH3/COX17/CDC25C/TUBB/HAX1/TIMM23/TIMM8A/CIAPIN1/CAT/HTRA2/NDUFB7/CHCHD5/TRAP1/PARK7/SOD1/SHMT2/TIMM9/NDUFA8/AK2/REXO2/NDUFS5/CHCHD2/PRELID1/LYN/AGK/TRIAP1/PINK1/APP/CHCHD4/TIMM10/TIMM8B/AIFM1/ARL2BP/CACYBP
GOBP_FORMATION_OF_CYTOPLASMIC_TRANSLATION_INITIATION_COMPLEX	GOBP_FORMATION_OF_CYTOPLASMIC_TRANSLATION_INITIATION_COMPLEX	16	0.688341	3.04682	6.43041e-07	2.52798e-05	2.00865e-05	9794	tags=100%, list=31%, signal=69%	EIF3M/EIF3F/EIF3J/EIF3CL/EIF3H/EIF3I/EIF3K/EIF3L/EIF3D/EIF3E/EIF3G/EIF3B/EIF3A/EIF2S2/EIF5/EIF3C
GOBP_PHOSPHATIDYLINOSITOL_BIOSYNTHETIC_PROCESS	GOBP_PHOSPHATIDYLINOSITOL_BIOSYNTHETIC_PROCESS	112	0.277927	2.27457	6.94939e-07	2.71535e-05	2.15752e-05	3032	tags=29%, list=10%, signal=26%	PIGK/GPAA1/PIK3CB/PIGH/PIGP/RAB5A/PIGY/IMPA1/PIGB/PIGF/DPM1/PIK3R4/RAB4A/PTPN13/PIGC/MTMR12/DPM3/ARF3/PIK3C2A/PLEKHA3/PIGM/MTMR6/PI4K2B/PIGW/PIGT/MTM1/PIP4K2A/OCRL/PIGO/PIGG/PIP4K2C/ARF1
GOBP_CELL_SUBSTRATE_JUNCTION_ORGANIZATION	GOBP_CELL_SUBSTRATE_JUNCTION_ORGANIZATION	99	-0.434803	-2.03215	7.10234e-07	2.75829e-05	2.19164e-05	4757	tags=32%, list=15%, signal=28%	DUSP3/GPM6B/SFRP1/EPB41L5/DST/S100A10/CORO1C/EPHA3/CORO2B/LRP1/DLC1/SLC9A1/VEGFA/PPM1F/BCL2/SORBS1/VCL/CLASP1/ITGB4/DAPK3/LAMB3/TRIP6/SMAD3/TLN1/ACTN1/FERMT2/COL17A1/COL16A1/FAM107A/KRT14/KRT5/ITGA5
GOBP_MUSCLE_CELL_DEVELOPMENT	GOBP_MUSCLE_CELL_DEVELOPMENT	157	-0.383856	-1.89598	7.23796e-07	2.79403e-05	2.22004e-05	3902	tags=28%, list=12%, signal=25%	OBSL1/SMO/KRT19/MYOZ2/EDN1/RGS4/TBX18/ANKRD1/FER1L5/LRRC10/TBX3/RGS2/FHL2/DYSF/P2RX2/VEGFA/NFATC4/TPM1/RAMP2/BCL2/PAK1/AKAP13/WFIKKN1/OBSCN/BIN1/SRF/EFEMP2/MYH3/MYOF/FHOD3/ISL1/NOTCH1/CSRP1/ACTC1/BIN3/CFLAR/HNRNPU/ACTA1/PGM5/PI16/LMOD1/LMOD3/MYH11/FLNC
GOMF_SNORNA_BINDING	GOMF_SNORNA_BINDING	30	0.516218	2.82669	7.54114e-07	2.88546e-05	2.29269e-05	3432	tags=43%, list=11%, signal=39%	DDX21/NHP2/HEATR1/XRCC5/NOP10/NUDT5/NUDT16L1/IMP3/BYSL/DKC1/GAR1/RRP9/UTP6
GOBP_CELLULAR_RESPONSE_TO_CORTICOSTEROID_STIMULUS	GOBP_CELLULAR_RESPONSE_TO_CORTICOSTEROID_STIMULUS	58	-0.516629	-2.21674	7.56488e-07	2.88546e-05	2.29269e-05	1344	tags=26%, list=4%, signal=25%	DDIT4/NPAS4/FOXO1/ERRFI1/STC1/ISL1/SERPINF1/SGK1/GSTP1/SCNN1G/ZFP36/CFLAR/HNRNPU/FAM107A/SSTR2
GOBP_MITOTIC_CYTOKINETIC_PROCESS	GOBP_MITOTIC_CYTOKINETIC_PROCESS	23	0.571211	2.89748	8.00865e-07	3.03665e-05	2.41282e-05	3073	tags=57%, list=10%, signal=51%	CHMP5/CHMP2B/CHMP4C/CHMP3/CHMP1B/MITD1/CEP55/VPS4B/KIF20A/CHMP2A/NUP62/ARF1/RHOA
GOBP_PRI_MIRNA_TRANSCRIPTION_BY_RNA_POLYMERASE_II	GOBP_PRI_MIRNA_TRANSCRIPTION_BY_RNA_POLYMERASE_II	52	-0.524867	-2.21165	8.31602e-07	3.13465e-05	2.49069e-05	2865	tags=31%, list=9%, signal=28%	PPARD/FGF2/NFATC4/KLF5/NGFR/GATA3/SOX9/SRF/JUN/NFIB/FOSL1/SMAD3/EGR1/IL10/FOS/ATOH8
GOBP_COPII_COATED_VESICLE_BUDDING	GOBP_COPII_COATED_VESICLE_BUDDING	69	0.344063	2.3389	1.08809e-06	4.07746e-05	3.23981e-05	2911	tags=26%, list=9%, signal=24%	TMED10/SEC23B/BET1/TMED2/F5/PDCD6/SAR1B/SEC24D/TRAPPC4/USO1/SEC13/SEC23IP/KLHL12/NSF/LMAN1/SEC22B/TRAPPC5/SEC24A
GOBP_FC_EPSILON_RECEPTOR_SIGNALING_PATHWAY	GOBP_FC_EPSILON_RECEPTOR_SIGNALING_PATHWAY	108	0.274945	2.2383	1.12296e-06	4.18369e-05	3.32422e-05	3066	tags=26%, list=10%, signal=23%	PSMC4/PPP3CA/PIK3CB/PSMA3/PSMD6/PSMA6/PSMD10/PSMA5/PSMB5/PSMD14/FCER1G/PSMA1/PSMA4/MAPK9/PSMC2/PSMB4/PSME2/PSMC6/PSMD7/PSMD2/PSMB2/PSMB7/LYN/PSMD5/PSMB1/PSMA2/PPP3R1/PSME3
GOBP_REGULATION_OF_FAT_CELL_DIFFERENTIATION	GOBP_REGULATION_OF_FAT_CELL_DIFFERENTIATION	123	-0.408932	-1.97172	1.14948e-06	4.25772e-05	3.38304e-05	5523	tags=35%, list=18%, signal=29%	JAG1/INS/ANKRD26/RUNX1T1/DDIT3/SFRP1/ZNF385A/LGALS12/WIF1/LMO3/CCDC3/HDAC6/TFE3/PPARD/CEBPB/HTR2A/ZFPM2/CARM1/ZBTB7C/DLK2/WDFY2/JDP2/KLF5/MIR21/CREB1/SOX13/BMP7/PIM1/ZC3H12A/GATA3/ZBTB16/FNDC5/WNT3A/ADIPOQ/RARRES2/FOXO1/SMAD3/ZFP36/FERMT2/HNRNPU/TGFB1I1/IL6/LEP
GOBP_PYRIMIDINE_CONTAINING_COMPOUND_BIOSYNTHETIC_PROCESS	GOBP_PYRIMIDINE_CONTAINING_COMPOUND_BIOSYNTHETIC_PROCESS	34	0.469295	2.67194	1.19475e-06	4.39997e-05	3.49607e-05	2318	tags=35%, list=7%, signal=33%	TK1/PRPS1/CMPK1/UPRT/TBPL1/DCTD/NME5/TYMS/NME7/DUT/UCK2/NME1
GOBP_PURINE_NUCLEOBASE_BIOSYNTHETIC_PROCESS	GOBP_PURINE_NUCLEOBASE_BIOSYNTHETIC_PROCESS	10	0.840409	3.04344	1.23846e-06	4.53488e-05	3.60326e-05	3509	tags=80%, list=11%, signal=71%	GMPS/PRPS1/HPRT1/PPAT/APRT/SHMT2/GART/PAICS
GOBP_HEMATOPOIETIC_STEM_CELL_DIFFERENTIATION	GOBP_HEMATOPOIETIC_STEM_CELL_DIFFERENTIATION	86	0.306904	2.24119	1.25168e-06	4.55725e-05	3.62104e-05	3223	tags=33%, list=10%, signal=29%	PSMC4/PSMA3/PSMD6/PSMA6/PSMD10/PSMA5/OCIAD2/PSMB5/PSMD14/XRCC5/PSMA1/PSMA4/PSMC2/PSMB4/PSME2/PSMC6/PSMD7/PSMD2/PSMB2/YTHDF2/HSPA9/PSMB7/PSMD5/PSMB1/PSMA2/METTL3/PSME3/PUS7
GOBP_THIOESTER_METABOLIC_PROCESS	GOBP_THIOESTER_METABOLIC_PROCESS	96	0.295573	2.18988	1.27877e-06	4.6173e-05	3.66875e-05	3549	tags=40%, list=11%, signal=35%	ACSM1/ELOVL5/HSD17B4/DBI/MCEE/ACSL1/SUCLG2/ACOT8/DLD/OXSM/FASN/ACLY/PPCS/ELOVL2/SUCLA2/DLAT/PDHX/ACAT1/ACSL3/PDHB/SLC25A1/HSD17B8/ACOT1/CBR4/HSD17B12/DGAT2/SCD/PMVK/ACOT4/MLYCD/ELOVL6/PPT1/ACOT2/HMGCS2/ELOVL7/ELOVL1/ACBD6/ACSM3
GOBP_ACTIN_FILAMENT_BUNDLE_ORGANIZATION	GOBP_ACTIN_FILAMENT_BUNDLE_ORGANIZATION	147	-0.390004	-1.91558	1.28258e-06	4.6173e-05	3.66875e-05	3973	tags=28%, list=13%, signal=24%	APOA1/FHDC1/BAG4/LIMK1/SPIRE1/S100A10/ELN/ARAP1/CORO2B/SORBS3/DLC1/SLC9A1/ARHGEF10/CGNL1/PPM1F/MIR21/TPM1/EVL/PAK1/ASAP3/SORBS1/CALD1/LPAR1/CLASP1/SRF/SHROOM1/SYNPO2/DPYSL3/ZYX/SMAD3/ID1/ACTN1/SHANK3/FERMT2/RAPGEF3/CX3CL1/TGFB3/SERPINF2/FAM107A/MICAL1/FLNA
GOCC_SAM_COMPLEX	GOCC_SAM_COMPLEX	11	0.790473	2.94763	1.30056e-06	4.65586e-05	3.69939e-05	4548	tags=82%, list=14%, signal=70%	APOO/MTX2/MTX1/HSPA9/CHCHD6/CHCHD3/SAMM50/DNAJC11/IMMT
GOBP_PROTEIN_K48_LINKED_UBIQUITINATION	GOBP_PROTEIN_K48_LINKED_UBIQUITINATION	59	0.356628	2.25911	1.31752e-06	4.69035e-05	3.7268e-05	8181	tags=75%, list=26%, signal=55%	UBE2T/PPIA/UBE2E1/RBX1/TRIM32/UBE2C/UBE2G1/PELI1/UBE2E2/UBE2H/UBE2D3/RNF4/DTX3L/AMFR/UBE2A/RNF5/UBE2E3/UBE2Q2/NEDD4L/BFAR/RNF146/FBXO38/SKP1/UBE2D4/RNF126/UBE2R2/SYVN1/RNF115/RNF187/HACE1/RFFL/NMI/UBR5/BIRC2/UBE3A/RNF6/UBE2D2/ITCH/TRIM44/TOPORS/CDC34/RNF8/RNF34/TTC3
GOMF_INTRAMOLECULAR_TRANSFERASE_ACTIVITY	GOMF_INTRAMOLECULAR_TRANSFERASE_ACTIVITY	26	0.542796	2.88605	1.36708e-06	4.83991e-05	3.84563e-05	3333	tags=42%, list=11%, signal=38%	CYP2J2/PGAM1/PGM3/PGM2/PMM1/PGAM4/PGM1/DKC1/RPUSD1/PUS7/PMM2
GOMF_PEPTIDE_DISULFIDE_OXIDOREDUCTASE_ACTIVITY	GOMF_PEPTIDE_DISULFIDE_OXIDOREDUCTASE_ACTIVITY	13	0.751908	2.97704	1.38277e-06	4.86811e-05	3.86804e-05	3488	tags=46%, list=11%, signal=41%	PDIA6/TXN/PDIA5/GLRX2/GSTO1/P4HB
GOBP_NUCLEOBASE_BIOSYNTHETIC_PROCESS	GOBP_NUCLEOBASE_BIOSYNTHETIC_PROCESS	16	0.67376	2.98228	1.39024e-06	4.86811e-05	3.86804e-05	3509	tags=56%, list=11%, signal=50%	GMPS/PRPS1/CMPK1/HPRT1/PPAT/APRT/SHMT2/GART/PAICS
GOBP_INNER_MITOCHONDRIAL_MEMBRANE_ORGANIZATION	GOBP_INNER_MITOCHONDRIAL_MEMBRANE_ORGANIZATION	30	0.503955	2.75954	1.41868e-06	4.94069e-05	3.92571e-05	3806	tags=53%, list=12%, signal=47%	APOO/ROMO1/TMEM11/MTX2/MTX1/TIMM9/HSPA9/CHCHD6/OMA1/AGK/CHCHD3/GHITM/PINK1/TIMM10/TIMM8B/SAMM50
GOCC_GOLGI_ASSOCIATED_VESICLE_MEMBRANE	GOCC_GOLGI_ASSOCIATED_VESICLE_MEMBRANE	47	0.397609	2.36202	1.46007e-06	5.05737e-05	4.01841e-05	1375	tags=28%, list=4%, signal=26%	KDELR2/AP1S1/TMED2/TMED7/SPPL2A/KDELR3/COPB2/COPZ1/COPB1/COPE/CLTC/COPA/GPR89A
GOCC_METHYLOSOME	GOCC_METHYLOSOME	12	0.747275	2.89843	1.48647e-06	5.12114e-05	4.06908e-05	3957	tags=75%, list=13%, signal=66%	SNRPF/CLNS1A/SNRPB/ERH/PRMT5/SNRPG/PRMT1/SNRPD2/SNRPD1
GOBP_MATURATION_OF_5_8S_RRNA	GOBP_MATURATION_OF_5_8S_RRNA	33	0.461436	2.62654	1.68004e-06	5.75706e-05	4.57437e-05	2368	tags=33%, list=8%, signal=31%	RPS21/WDR12/RPP40/EXOSC4/RRS1/EXOSC3/RPF1/RCL1/RRP15/EXOSC9/NSA2
GOBP_TRANSITION_METAL_ION_HOMEOSTASIS	GOBP_TRANSITION_METAL_ION_HOMEOSTASIS	132	0.252393	2.25955	1.7127e-06	5.83776e-05	4.63849e-05	3516	tags=32%, list=11%, signal=28%	GLRX3/SLC39A6/MYC/SLC39A8/BMP6/ATP6V1A/STEAP1/SCO2/FTL/CAND1/ATP6V1G1/B2M/SCO1/ATP7A/SRI/BOLA2/SLC39A10/SOD1/STEAP2/FTH1/IREB2/STEAP4/MT1B/CCDC22/CYBRD1/ATP6V0D1/FBXL5/HIF1A/NDFIP1/SLC46A1/SLC30A9/ARF1/NEDD8/AP3B1/PICALM/CCDC115/MT1M/SLC40A1/MT1H/SLC1A1/APP/NCOA4
GOBP_RIBONUCLEOSIDE_MONOPHOSPHATE_BIOSYNTHETIC_PROCESS	GOBP_RIBONUCLEOSIDE_MONOPHOSPHATE_BIOSYNTHETIC_PROCESS	32	0.490193	2.70798	1.73674e-06	5.88838e-05	4.67871e-05	3586	tags=44%, list=11%, signal=39%	GMPS/PRPS1/CMPK1/HPRT1/UPRT/PPAT/APRT/ADSL/UCK2/PRPS2/GART/NUDT2/PAICS/IMPDH2
GOBP_NUCLEOTIDE_EXCISION_REPAIR_DNA_DAMAGE_RECOGNITION	GOBP_NUCLEOTIDE_EXCISION_REPAIR_DNA_DAMAGE_RECOGNITION	23	0.555201	2.81627	1.75514e-06	5.91945e-05	4.70339e-05	11747	tags=96%, list=37%, signal=60%	UBB/COPS5/RBX1/COPS4/RAD23B/COPS3/COPS8/CETN2/RPS27A/CUL4A/CUL4B/COPS6/UBC/COPS2/COPS7A/GPS1/PARP1/UBA52/DDB2/COPS7B/XPA/DDB1
GOCC_SARCOLEMMA	GOCC_SARCOLEMMA	131	-0.392112	-1.90381	1.89342e-06	6.35238e-05	5.04739e-05	3595	tags=25%, list=11%, signal=22%	KRT19/FXYD1/FKRP/CORO1C/PDE9A/FER1L5/PPP3CB/SLMAP/SSPN/STAC/ATP1A2/DYSF/SLC9A1/CACNA1C/OBSCN/BIN1/VCL/SGCA/COL6A3/CAV1/COL6A2/KCNB1/ATP2B4/SYNM/CIB2/TGFB3/PGM5/POPDC2/AHNAK2/SLC2A5/COL6A1/DES/FLNC
GOBP_POSITIVE_REGULATION_OF_PRI_MIRNA_TRANSCRIPTION_BY_RNA_POLYMERASE_II	GOBP_POSITIVE_REGULATION_OF_PRI_MIRNA_TRANSCRIPTION_BY_RNA_POLYMERASE_II	40	-0.547445	-2.1934	1.91882e-06	6.40405e-05	5.08844e-05	2526	tags=30%, list=8%, signal=28%	FGF2/KLF5/NGFR/GATA3/SRF/JUN/FOSL1/SMAD3/EGR1/IL10/FOS/ATOH8
GOBP_DNA_TEMPLATED_TRANSCRIPTION_TERMINATION	GOBP_DNA_TEMPLATED_TRANSCRIPTION_TERMINATION	66	0.338132	2.16236	1.98423e-06	6.58806e-05	5.23465e-05	3392	tags=38%, list=11%, signal=34%	ZMPSTE24/POLR3K/GTF2H5/SNRPF/SLBP/CSTF2T/TTF2/POLR2H/SNRPB/POLR2F/PRMT5/MNAT1/SNRPG/CPSF2/CPSF3/POLR2L/CCNH/GTF2H3/POLR1C/CLP1/LSM10/XRN2/TAF1B/NCBP2/POLR2K
GOBP_RIBOSOMAL_LARGE_SUBUNIT_ASSEMBLY	GOBP_RIBOSOMAL_LARGE_SUBUNIT_ASSEMBLY	26	0.533999	2.83927	2.03446e-06	6.72001e-05	5.33949e-05	3723	tags=46%, list=12%, signal=41%	RPLP0/MRPL20/BRIX1/FASTKD2/RRS1/RPL24/RPL23A/RPL6/RSL24D1/RPL38/BOP1/RPL3
GOBP_MULTIVESICULAR_BODY_ORGANIZATION	GOBP_MULTIVESICULAR_BODY_ORGANIZATION	29	0.508823	2.76934	2.04987e-06	6.7362e-05	5.35235e-05	3126	tags=45%, list=10%, signal=40%	CHMP5/CHMP2B/CHMP4C/CHMP3/TSG101/VPS25/CHMP1B/VPS4B/STAM/STAM2/CHMP2A/VTA1/RAB11A
GOMF_LIGASE_ACTIVITY_FORMING_CARBON_OXYGEN_BONDS	GOMF_LIGASE_ACTIVITY_FORMING_CARBON_OXYGEN_BONDS	22	0.567458	2.85026	2.06895e-06	6.76419e-05	5.37459e-05	10676	tags=95%, list=34%, signal=63%	YARS2/IARS2/NARS2/WARS2/DARS2/LARS2/EARS2/FARSA/FARS2/MARS2/RARS2/VARS2/PARS2/LRRC47/SARS2/TARS2/CARS2/DALRD3/HARS2/AARSD1/FARSB
GOBP_CHROMOSOME_SEPARATION	GOBP_CHROMOSOME_SEPARATION	87	0.297293	2.16156	2.24707e-06	7.23979e-05	5.75249e-05	2658	tags=26%, list=8%, signal=24%	TOP2A/PTTG3P/CDC20/PTTG1/NSMCE2/PSMG2/RIOK2/UBE2C/LCMT1/BUB1/ANAPC7/RMI1/AURKB/MAD2L1BP/DLGAP5/SMARCAD1/CSNK2A1/MAD2L2/TACC3/ANAPC5/RB1/MLH1/CDT1
GOBP_MIDBODY_ABSCISSION	GOBP_MIDBODY_ABSCISSION	17	0.635248	2.83108	2.25093e-06	7.23979e-05	5.75249e-05	2722	tags=59%, list=9%, signal=54%	CHMP5/CHMP2B/CHMP4C/CHMP3/CHMP1B/MITD1/CEP55/VPS4B/KIF20A/CHMP2A
GOBP_PURINE_NUCLEOSIDE_MONOPHOSPHATE_BIOSYNTHETIC_PROCESS	GOBP_PURINE_NUCLEOSIDE_MONOPHOSPHATE_BIOSYNTHETIC_PROCESS	21	0.596727	2.91078	2.25814e-06	7.23979e-05	5.75249e-05	3586	tags=52%, list=11%, signal=46%	GMPS/HPRT1/PPAT/APRT/ADSL/DCK/PRPS2/GART/NUDT2/PAICS/IMPDH2
GOBP_FAT_CELL_DIFFERENTIATION	GOBP_FAT_CELL_DIFFERENTIATION	205	-0.354333	-1.79125	2.25961e-06	7.23979e-05	5.75249e-05	5523	tags=30%, list=18%, signal=25%	JAG1/SMAD6/INS/PIAS1/ANKRD26/RUNX1T1/DDIT3/NR4A3/SLC2A4/SFRP1/UCP1/ZNF385A/LGALS12/WIF1/LMO3/CCDC3/HDAC6/TFE3/RETN/PPARD/PRLH/CEBPB/HTR2A/NR4A1/PER2/ZFPM2/RGS2/CARM1/ZBTB7C/TCF7L2/DLK2/WDFY2/JDP2/KLF5/MIR21/CREB1/FABP3/SOX13/BMP7/PIM1/SOCS1/ZNF516/ZC3H12A/GATA3/ZBTB16/WNT5B/FNDC5/NR4A2/WNT3A/ADIPOQ/RARRES2/FOXO1/SMAD3/PPARGC1A/ZFP36/FERMT2/HNRNPU/TGFB1I1/IL6/LEP/CLIP3
GOBP_REGULATION_OF_EXTRACELLULAR_MATRIX_ORGANIZATION	GOBP_REGULATION_OF_EXTRACELLULAR_MATRIX_ORGANIZATION	41	-0.55444	-2.235	2.27946e-06	7.26704e-05	5.77414e-05	2276	tags=34%, list=7%, signal=32%	TNFRSF1A/LRP1/SOX9/CLASP1/EFEMP2/PDPN/DDR2/SMAD3/NOTCH1/EMILIN1/CFLAR/PHLDB1/AEBP1/IL6
GOMF_RNA_BINDING_INVOLVED_IN_POSTTRANSCRIPTIONAL_GENE_SILENCING	GOMF_RNA_BINDING_INVOLVED_IN_POSTTRANSCRIPTIONAL_GENE_SILENCING	187	-0.363899	-1.82322	2.3631e-06	7.49641e-05	5.95639e-05	18443	tags=90%, list=59%, signal=37%	MIR302A/MIR200C/MIR659/MIR29B1/MIR920/MIRLET7E/MIR497/MIR423/MIR96/MIR132/MIR181B1/MIR34B/MIR148A/MIR519B/MIR222/MIR208B/MIR30A/MIR31/MIR301A/MIR153-1/MIR191/MIR296/MIRLET7C/MIR146A/MIR1207/MIR640/MIR892B/MIR654/MIR26B/MIR183/MIR708/MIRLET7F1/MIR144/MIR128-1/MIR15B/MIR424/MIR588/MIR374B/MIR130B/MIR188/MIR200B/MIR573/MIR873/MIR212/MIR140/MIR149/MIR767/MIR519E/MIR107/MIRLET7A1/MIR196A1/MIR101-1/MIR…
GOMF_TRANSLATION_INITIATION_FACTOR_BINDING	GOMF_TRANSLATION_INITIATION_FACTOR_BINDING	29	0.503808	2.74205	2.6744e-06	8.44215e-05	6.70785e-05	9794	tags=86%, list=31%, signal=59%	TBL2/NCK1/EIF3M/EIF3F/TRIM32/POLR2D/RPS24/EIF3CL/POLR2G/EIF4EBP2/GLE1/EIF3B/LARP1/GCH1/EIF4EBP3/EIF2B5/EIF2B4/DDX3X/EIF2S2/EIF4EBP1/EIF4G1/HHEX/EIF5/OTX2/EIF3C
GOCC_CONTRACTILE_FIBER	GOCC_CONTRACTILE_FIBER	222	-0.348436	-1.77136	2.70536e-06	8.49802e-05	6.75224e-05	3406	tags=23%, list=11%, signal=20%	MYBPC3/MYOZ2/ANKRD23/SPTBN1/JPH2/CORO1C/FHL3/ANKRD1/LRRC10/PPP3CB/FBXL22/BAG3/CMYA5/FHL2/PDLIM7/PDLIM4/MYOZ3/KCNA5/TPM1/CACNA1C/PALLD/PAK1/OBSCN/SVIL/BIN1/VCL/CALD1/SYNPO2/MYH3/TPM2/FHOD3/CSRP1/ACTC1/ATP2B4/NEXN/ACTN1/FERMT2/SYNM/ACTA1/MYOM1/PGM5/CRYAB/MYL9/AHNAK2/LMOD1/LMOD3/DES/MYH11/FLNA/FLNC
GOBP_PYRIMIDINE_NUCLEOTIDE_BIOSYNTHETIC_PROCESS	GOBP_PYRIMIDINE_NUCLEOTIDE_BIOSYNTHETIC_PROCESS	27	0.498057	2.67883	2.77436e-06	8.63295e-05	6.85945e-05	2318	tags=41%, list=7%, signal=38%	PRPS1/CMPK1/UPRT/TBPL1/DCTD/NME5/TYMS/NME7/DUT/UCK2/NME1
GOBP_NUCLEOTIDE_SUGAR_BIOSYNTHETIC_PROCESS	GOBP_NUCLEOTIDE_SUGAR_BIOSYNTHETIC_PROCESS	21	0.592875	2.89199	2.77526e-06	8.63295e-05	6.85945e-05	3333	tags=62%, list=11%, signal=55%	GFPT1/PGM3/GMDS/NANS/UAP1/UGDH/GMPPB/PMM1/MPI/GNPDA1/GNPDA2/GNPNAT1/PMM2
GOBP_CELLULAR_TRANSITION_METAL_ION_HOMEOSTASIS	GOBP_CELLULAR_TRANSITION_METAL_ION_HOMEOSTASIS	113	0.262542	2.17903	2.89432e-06	8.95982e-05	7.11917e-05	3516	tags=33%, list=11%, signal=29%	GLRX3/SLC39A6/MYC/SLC39A8/BMP6/ATP6V1A/SCO2/FTL/CAND1/ATP6V1G1/SCO1/ATP7A/SRI/BOLA2/SLC39A10/SOD1/FTH1/IREB2/MT1B/CCDC22/CYBRD1/ATP6V0D1/FBXL5/HIF1A/NDFIP1/SLC46A1/SLC30A9/ARF1/NEDD8/AP3B1/CCDC115/MT1M/SLC40A1/MT1H/SLC1A1/APP/NCOA4
GOCC_ENDOPLASMIC_RETICULUM_QUALITY_CONTROL_COMPARTMENT	GOCC_ENDOPLASMIC_RETICULUM_QUALITY_CONTROL_COMPARTMENT	22	0.554976	2.78756	3.23164e-06	9.95593e-05	7.91064e-05	3959	tags=55%, list=13%, signal=48%	EDEM1/SEL1L/SEC61B/RNF103/DERL1/FBXO6/EDEM2/DERL2/OS9/AMFR/HERPUD1/RNF5
GOBP_PEPTIDYL_ASPARAGINE_MODIFICATION	GOBP_PEPTIDYL_ASPARAGINE_MODIFICATION	28	0.510279	2.728	3.42689e-06	0.00010507	8.34847e-05	3175	tags=54%, list=10%, signal=48%	OSTC/STT3B/DAD1/TUSC3/DPM1/DDOST/DPM3/STT3A/ALG5/MGAT2/LMAN1/ALG8/RPN1/NUDT14/MCFD2
GOBP_PROTEASOME_ASSEMBLY	GOBP_PROTEASOME_ASSEMBLY	12	0.725723	2.81483	3.45081e-06	0.000105299	8.36671e-05	4019	tags=83%, list=13%, signal=73%	PSMD10/PSMG1/PSMG2/OTUD6B/PSMD5/PSMG4/POMP/ADRM1/PSMD13/PSMD4
GOBP_ACTIN_FILAMENT_ORGANIZATION	GOBP_ACTIN_FILAMENT_ORGANIZATION	396	-0.299503	-1.59461	3.49102e-06	0.000106021	8.42407e-05	3240	tags=20%, list=10%, signal=18%	SPTBN2/RGS4/CCL26/SPTBN1/S100A10/CORO1C/INPPL1/CORO6/SPTBN4/ELN/ARAP1/MYO1F/CORO2B/SORBS3/PFN4/PICK1/DLC1/SLC9A1/ARHGEF10/RHOBTB2/RUFY3/CGNL1/TTC17/PPM1F/MIR21/TPM1/NLRP5/EVL/BCL2/EFS/PAK1/MPRIP/SPTAN1/ASAP3/SVIL/CORO7/SORBS1/BIN1/CALD1/LPAR1/CLASP1/SRF/SHROOM1/SYNPO2/ZBED3/RHOB/ARHGEF2/ENAH/TPM2/RND3/VILL/DPYSL3/SLIT2/ZYX/FHOD3/SMAD3/RND2/CDC42EP5/ID1/ACTC1/BIN3/ACTN1/KANK4/SHANK3/FERMT2/RAPGEF3…
GOCC_U2_TYPE_SPLICEOSOMAL_COMPLEX	GOCC_U2_TYPE_SPLICEOSOMAL_COMPLEX	85	0.300697	2.17731	3.55155e-06	0.000107351	8.52972e-05	4073	tags=45%, list=13%, signal=39%	SNRPN/LSM3/PPIL1/SNRPF/DHX15/SNRPB2/LSM7/SNRPB/LSM4/SNRPC/LSM5/SNRPG/EIF4A3/CRNKL1/CDC5L/SF3B5/PLRG1/PRPF6/CWC15/PRPF18/LSM8/SNRPA1/PPIE/LSM2/ZMAT2/SNRNP40/SNW1/RNF113A/SNIP1/SMU1/U2AF2/SF3B1/MFAP1/SNRPD2/SNRPD1/SYF2/ISY1/PRPF4
GOCC_COPI_VESICLE_COAT	GOCC_COPI_VESICLE_COAT	11	0.764493	2.85075	3.58046e-06	0.000107587	8.54852e-05	2866	tags=73%, list=9%, signal=66%	TMED7/COPB2/COPZ1/COPB1/COPE/COPA/TMED3/ARCN1
GOCC_EUKARYOTIC_48S_PREINITIATION_COMPLEX	GOCC_EUKARYOTIC_48S_PREINITIATION_COMPLEX	15	0.674656	2.85724	3.59296e-06	0.000107587	8.54852e-05	3750	tags=53%, list=12%, signal=47%	EIF3M/EIF3F/EIF3J/EIF3CL/EIF3H/EIF3I/EIF3K/EIF3L
GOCC_BASEMENT_MEMBRANE	GOCC_BASEMENT_MEMBRANE	91	-0.431275	-1.99248	4.06839e-06	0.000121257	9.63466e-05	4944	tags=36%, list=16%, signal=31%	ACHE/TINAG/COL4A4/COL4A1/DST/COL8A2/LAMA5/COLQ/VWA2/NTN5/EGFLAM/FREM2/FGF9/AGRN/COL4A6/LAMC3/TNC/NTN4/LAMA4/COL4A5/COL4A2/EFEMP2/ITGB4/PTN/COL5A1/LAMB3/COL18A1/SERPINF1/ADAMTS1/COL17A1/SMOC1/LAMB2/COL7A1
GOBP_PROTEIN_LOCALIZATION_TO_CHROMOSOME_TELOMERIC_REGION	GOBP_PROTEIN_LOCALIZATION_TO_CHROMOSOME_TELOMERIC_REGION	27	0.492017	2.64635	4.2179e-06	0.000125131	9.94249e-05	2743	tags=44%, list=9%, signal=41%	CCT2/CCT8/TCP1/CCT7/XRCC5/CCT6A/GNL3/TINF2/CCT5/DKC1/CCT3/CCT4
GOCC_CYCLIN_DEPENDENT_PROTEIN_KINASE_HOLOENZYME_COMPLEX	GOCC_CYCLIN_DEPENDENT_PROTEIN_KINASE_HOLOENZYME_COMPLEX	37	0.437739	2.41867	4.2805e-06	0.000126272	0.000100332	3446	tags=41%, list=11%, signal=36%	CCNO/CKS1B/CCNG2/CCNB2/CKS2/CDK4/PCNA/CCNG1/MNAT1/RB1/CCNH/CCNA2/BCCIP/CCNE2/SNW1
GOBP_NUCLEOBASE_CONTAINING_SMALL_MOLECULE_INTERCONVERSION	GOBP_NUCLEOBASE_CONTAINING_SMALL_MOLECULE_INTERCONVERSION	22	0.547141	2.74821	4.29579e-06	0.000126272	0.000100332	3843	tags=55%, list=12%, signal=48%	CMPK1/DCTD/RRM2B/TYMS/DUT/AK2/NME1/RRM1/RRM2/GUK1/TXNRD1/NME3
GOCC_LUMENAL_SIDE_OF_ENDOPLASMIC_RETICULUM_MEMBRANE	GOCC_LUMENAL_SIDE_OF_ENDOPLASMIC_RETICULUM_MEMBRANE	28	0.505897	2.70457	4.41303e-06	0.000129127	0.0001026	2307	tags=32%, list=7%, signal=30%	HLA-DRB1/HLA-DRB5/HLA-DQA1/SPPL2A/HLA-DRA/HLA-DPA1/CANX/HLA-DRB4/HLA-DRB3
GOBP_MUSCLE_CELL_DIFFERENTIATION	GOBP_MUSCLE_CELL_DIFFERENTIATION	329	-0.313505	-1.65161	4.52792e-06	0.000131886	0.000104792	3702	tags=22%, list=12%, signal=20%	SMO/KRT19/MAPK11/SPEG/MYOZ2/EDN1/RGS4/TBX18/SMARCD3/ANKRD1/FER1L5/LRRC10/TBX3/SUPT6H/RGS2/FGF9/FHL2/MIR100/DYSF/P2RX2/SLC9A1/DKK1/VEGFA/MYOCD/NFATC4/KLF5/MIR21/IGFBP5/TPM1/RAMP2/RBM38/BCL2/FOXO4/TBX2/PAK1/AKAP13/SOX9/WFIKKN1/SEMA4C/OBSCN/KDM6B/WNT5B/BIN1/BOC/SRF/DLL1/IL4R/EFEMP2/WNT3A/MYH3/MYOF/FHOD3/ISL1/NOTCH1/CSRP1/ACTC1/BIN3/CFLAR/FOXF1/HNRNPU/SIK1/ACTA1/CACNA1H/PGM5/POPDC2/EHD2/PI16/LMOD1/RB…
GOBP_NUCLEOSIDE_BISPHOSPHATE_METABOLIC_PROCESS	GOBP_NUCLEOSIDE_BISPHOSPHATE_METABOLIC_PROCESS	130	0.247532	2.10386	4.68005e-06	0.0001357	0.000107823	3557	tags=34%, list=11%, signal=30%	MCCC2/ACSM1/ELOVL5/HSD17B4/DBI/MCEE/ACSL1/SUCLG2/ACOT8/DLD/PAPSS1/OXSM/FASN/ACLY/PPCS/SLC35B2/ELOVL2/SLC35B3/SUCLA2/DLAT/PDHX/ACAT1/ACSL3/PDHB/SLC25A1/HSD17B8/ACOT1/CBR4/BPNT1/HSD17B12/DGAT2/SCD/PMVK/ACOT4/MLYCD/ELOVL6/PPT1/ACOT2/HMGCS2/ELOVL7/ELOVL1/ACBD6/ACSM3/ENPP1
GOBP_GLAND_MORPHOGENESIS	GOBP_GLAND_MORPHOGENESIS	111	-0.405775	-1.93214	4.7228e-06	0.000136323	0.000108318	2985	tags=28%, list=10%, signal=25%	PLXNA1/SEMA3A/TBX3/CEBPB/SULF2/EPHA2/HOXD13/TGM2/EDAR/IGFBP5/BMP7/MSN/BCL2/TBX2/SOX9/TNC/NRG3/NTN4/GLI3/WNT3A/PTN/CAV1/SERPINB5/NOTCH1/CFLAR/TGFB3/CEACAM1/LIMS2/IL6/LRP5L/TP63
GOCC_ENDOPLASMIC_RETICULUM_GOLGI_INTERMEDIATE_COMPARTMENT	GOCC_ENDOPLASMIC_RETICULUM_GOLGI_INTERMEDIATE_COMPARTMENT	110	0.262979	2.09238	4.855e-06	0.000139511	0.00011085	3721	tags=33%, list=12%, signal=29%	TMED10/BET1/PDIA6/TMED5/TMED2/F5/TMED7/RAB2A/MGAT4A/COPB1/TMED9/SURF4/CNIH4/SEC23IP/MTMR6/YIF1A/GJB2/TMED3/LMAN1/SEC22B/ERGIC3/TMED4/LRPAP1/TRAPPC5/TMED1/GNPNAT1/MCFD2/NUCB2/CCDC115/TMED6/RER1/P4HB/BCAP31/MGAT4B/TMEM199/YIF1B
GOBP_ENDOSOME_TRANSPORT_VIA_MULTIVESICULAR_BODY_SORTING_PATHWAY	GOBP_ENDOSOME_TRANSPORT_VIA_MULTIVESICULAR_BODY_SORTING_PATHWAY	28	0.504059	2.69475	4.90611e-06	0.00014035	0.000111517	3341	tags=50%, list=11%, signal=45%	CHMP5/CHMP2B/CHMP4C/CHMP3/VPS25/CHMP1B/VPS4B/STAM/CHMP2A/LEPROTL1/VTA1/TMEM50A/VCP/UBXN6
GOMF_PROTEIN_FOLDING_CHAPERONE	GOMF_PROTEIN_FOLDING_CHAPERONE	36	0.434951	2.41845	5.47727e-06	0.000155332	0.000123421	3337	tags=47%, list=11%, signal=42%	CCT2/HSPA8/CCT8/TCP1/CCT7/CCT6A/PDCL3/PFDN1/HSPA14/HSP90AB1/HSPA9/CCT5/CCT3/CCT4/CCT6B/HSP90AA1/ZMYND10
GOCC_MHC_PROTEIN_COMPLEX	GOCC_MHC_PROTEIN_COMPLEX	25	0.509596	2.692	5.4846e-06	0.000155332	0.000123421	2307	tags=32%, list=7%, signal=30%	HLA-DRB1/HLA-DRB5/HLA-DQA1/HLA-DRA/B2M/HLA-DPA1/HLA-DRB4/HLA-DRB3
GOBP_REGULATION_OF_CHROMOSOME_SEPARATION	GOBP_REGULATION_OF_CHROMOSOME_SEPARATION	69	0.3268	2.22155	5.50255e-06	0.000155332	0.000123421	2294	tags=26%, list=7%, signal=24%	PTTG3P/CDC20/PTTG1/NSMCE2/PSMG2/RIOK2/UBE2C/LCMT1/BUB1/ANAPC7/AURKB/MAD2L1BP/DLGAP5/CSNK2A1/MAD2L2/TACC3/ANAPC5/RB1
GOBP_PROTEIN_MATURATION_BY_IRON_SULFUR_CLUSTER_TRANSFER	GOBP_PROTEIN_MATURATION_BY_IRON_SULFUR_CLUSTER_TRANSFER	12	0.713803	2.7686	5.81857e-06	0.000163532	0.000129937	2173	tags=50%, list=7%, signal=47%	GLRX3/ISCA1/GLRX5/NFU1/BOLA2/MAGEF1
GOMF_CARBON_OXYGEN_LYASE_ACTIVITY	GOMF_CARBON_OXYGEN_LYASE_ACTIVITY	67	0.310418	2.06709	5.92704e-06	0.000165854	0.000131782	2682	tags=31%, list=9%, signal=29%	AUH/HSD17B4/PTS/APIP/CA2/PCBD1/EHHADH/GMDS/FASN/XRCC5/HADHB/ACO2/PARK7/ECHS1/IREB2/TPI1/CYP1B1/ENOSF1/RPS3/FH/ENO1
GOBP_CELLULAR_ALDEHYDE_METABOLIC_PROCESS	GOBP_CELLULAR_ALDEHYDE_METABOLIC_PROCESS	59	0.336491	2.13155	6.3607e-06	0.000177215	0.000140809	2363	tags=31%, list=8%, signal=28%	IDH1/PNPO/BMP6/PDXP/ALDH1A3/GLO1/AKR1C3/ALDH7A1/ESD/HAGH/ALDH1A1/GRHPR/AKR1A1/PARK7/RDH11/TPI1/CYP1B1/ALDH9A1
GOMF_MRNA_5_UTR_BINDING	GOMF_MRNA_5_UTR_BINDING	26	0.510318	2.71336	6.65301e-06	0.000184556	0.000146642	3356	tags=46%, list=11%, signal=41%	RPS7/RPL26/RPS13/GNL3/SYNCRIP/DHX36/MRPS11/SHMT2/RPS14/CCT5/RPS3A/NCL
GOBP_PH_REDUCTION	GOBP_PH_REDUCTION	57	0.345784	2.24369	6.8092e-06	0.000187268	0.000148797	3694	tags=40%, list=12%, signal=36%	AQP11/ATP6V1A/CA2/ATP6V0B/SNAPIN/ATP6V1G1/RAB20/GPR89A/ATP6V0E2/GRN/ATP6V0E1/ATP6AP2/TMEM9/ATP6V0D1/ATP6V1E2/CLCN3/ATP6V1D/DMXL1/CCDC115/PPT1/ATP6V1F/ATP6V1B2/TMEM199
GOCC_MICROBODY_MEMBRANE	GOCC_MICROBODY_MEMBRANE	57	0.34588	2.24431	6.8092e-06	0.000187268	0.000148797	3164	tags=33%, list=10%, signal=30%	SLC27A2/HSD17B4/PEX7/ACSL1/PEX10/SLC25A17/PEX11B/CAT/GNPAT/ACSL3/MGST1/MPV17/FIS1/PEX11A/PXMP2/PEX19/TMEM135/ARF1/PEX1
GOBP_TELOMERE_MAINTENANCE_VIA_SEMI_CONSERVATIVE_REPLICATION	GOBP_TELOMERE_MAINTENANCE_VIA_SEMI_CONSERVATIVE_REPLICATION	27	0.479787	2.58057	6.93612e-06	0.000189943	0.000150922	3393	tags=44%, list=11%, signal=40%	RPA3/RFC4/POLE4/PCNA/PRIM2/POLE3/FEN1/PRIM1/RPA1/POLD2/RPA2/RFC3
GOBP_NUCLEOSIDE_METABOLIC_PROCESS	GOBP_NUCLEOSIDE_METABOLIC_PROCESS	93	0.278705	2.08939	7.21555e-06	0.000196696	0.000156288	3664	tags=28%, list=12%, signal=25%	ENPP4/TK1/GMPS/PRPS1/RAN/HPRT1/UPRT/PPAT/GNMT/AHCY/APRT/NME5/NME7/ERH/UCK2/GNAI3/NME1/APOBEC3B/DCK/PRPSAP2/PRPS2/GMPR2/GUK1/ENTPD7/IMPDH2/CASK
GOCC_CHAPERONIN_CONTAINING_T_COMPLEX	GOCC_CHAPERONIN_CONTAINING_T_COMPLEX	10	0.799342	2.89472	7.24413e-06	0.000196696	0.000156288	3002	tags=90%, list=10%, signal=81%	CCT2/CCT8/TCP1/CCT7/CCT6A/CCT5/CCT3/CCT4/CCT6B
GOBP_PURINE_NUCLEOSIDE_METABOLIC_PROCESS	GOBP_PURINE_NUCLEOSIDE_METABOLIC_PROCESS	54	0.350296	2.24727	7.32079e-06	0.000197939	0.000157276	3843	tags=31%, list=12%, signal=28%	ENPP4/GMPS/RAN/HPRT1/GNMT/AHCY/APRT/NME5/NME7/GNAI3/NME1/GMPR2/GUK1/ENTPD7/IMPDH2/CASK/NME3
GOBP_NUCLEAR_TRANSCRIBED_MRNA_CATABOLIC_PROCESS_EXONUCLEOLYTIC	GOBP_NUCLEAR_TRANSCRIBED_MRNA_CATABOLIC_PROCESS_EXONUCLEOLYTIC	34	0.44183	2.51556	7.45748e-06	0.000200788	0.000159539	3087	tags=44%, list=10%, signal=40%	EXOSC5/LSM3/EXOSC4/WDR61/EXOSC3/CNOT7/LSM7/TTC37/LSM4/CNOT8/LSM5/CNOT6/EXOSC9/POLR2G/LSM2
GOBP_NUCLEOBASE_METABOLIC_PROCESS	GOBP_NUCLEOBASE_METABOLIC_PROCESS	29	0.484788	2.63853	7.60273e-06	0.000203842	0.000161966	3509	tags=45%, list=11%, signal=40%	GMPS/PRPS1/CMPK1/HPRT1/PPAT/APRT/TYMS/SHMT2/RRM1/GART/GMPR2/ALDH6A1/PAICS
GOBP_REGULATION_OF_ACTIN_FILAMENT_BUNDLE_ASSEMBLY	GOBP_REGULATION_OF_ACTIN_FILAMENT_BUNDLE_ASSEMBLY	96	-0.415123	-1.93834	8.55981e-06	0.000228547	0.000181596	3973	tags=30%, list=13%, signal=26%	APOA1/BAG4/LIMK1/S100A10/ARAP1/CORO2B/SORBS3/DLC1/SLC9A1/ARHGEF10/CGNL1/PPM1F/MIR21/TPM1/EVL/PAK1/ASAP3/LPAR1/CLASP1/SYNPO2/SMAD3/ID1/SHANK3/FERMT2/RAPGEF3/CX3CL1/TGFB3/SERPINF2/FLNA
GOBP_PURINE_NUCLEOBASE_METABOLIC_PROCESS	GOBP_PURINE_NUCLEOBASE_METABOLIC_PROCESS	16	0.621862	2.75257	9.1321e-06	0.000242806	0.000192925	3509	tags=56%, list=11%, signal=50%	GMPS/PRPS1/HPRT1/PPAT/APRT/SHMT2/GART/GMPR2/PAICS
GOBP_ENDOPLASMIC_RETICULUM_UNFOLDED_PROTEIN_RESPONSE	GOBP_ENDOPLASMIC_RETICULUM_UNFOLDED_PROTEIN_RESPONSE	117	0.248665	2.1637	9.16963e-06	0.000242806	0.000192925	2491	tags=21%, list=8%, signal=20%	SERP1/PDIA6/XBP1/TBL2/PDIA5/TMED2/NCK1/EDEM1/GFPT1/CREB3L4/KDELR3/AGR2/DERL1/COPS5/SSR1/DNAJB9/STUB1/CANX/YIF1A/SRPRB/EIF2AK3/HDGF/TMTC4/ATP6V0D1/DERL2
GOBP_AXON_DEVELOPMENT	GOBP_AXON_DEVELOPMENT	487	-0.279003	-1.50511	9.23951e-06	0.000243649	0.000193595	5161	tags=24%, list=16%, signal=21%	PLXNC1/KEL/TIAM1/DNM2/MIR221/ZSWIM6/LLGL1/FYN/SEMA7A/RTN4RL1/EFNA2/CDH2/FEZF1/VASH2/ADARB1/SEMA5B/PLCG1/NEFL/APOA1/PARD6B/SMO/LAMA5/EFNB3/LIMK1/SPTBN2/SLIT1/HDAC6/LINGO1/SPTBN1/UNC5B/CRABP2/LRRC4C/GAP43/PLXNA1/CNTN2/EPHA3/FLRT2/SEMA3A/UNC5D/NTN5/SPTBN4/PPP3CB/TRIM46/NPTX1/POU4F1/EPHA2/MYCBP2/HOXA2/ULK2/LRP1/PDLIM7/TNN/PLXNA4/BRSK2/VEGFA/SLIT3/SLITRK3/RUFY3/GFRA3/PIK3CD/LRP4/CREB1/NUMBL/EPHB1/BMP7…
GOBP_RRNA_MODIFICATION	GOBP_RRNA_MODIFICATION	25	0.499798	2.64023	9.27869e-06	0.00024368	0.00019362	3077	tags=32%, list=10%, signal=29%	TFB2M/METTL5/TRMT112/NHP2/NOP10/DKC1/RPUSD1/GAR1
GOBP_CELL_REDOX_HOMEOSTASIS	GOBP_CELL_REDOX_HOMEOSTASIS	39	0.407336	2.41528	9.41635e-06	0.000246286	0.00019569	1917	tags=26%, list=6%, signal=24%	PRDX3/TXN/PRDX4/APEX1/PRDX2/DLD/GLRX2/SLC2A10/PRDX1/PRDX5
GOBP_MITOTIC_METAPHASE_PLATE_CONGRESSION	GOBP_MITOTIC_METAPHASE_PLATE_CONGRESSION	45	0.382628	2.26354	1.00928e-05	0.000262906	0.000208896	3126	tags=38%, list=10%, signal=34%	CHMP5/CHMP2B/CHMP4C/CDCA5/CHMP1B/BECN1/SEH1L/RRS1/AURKB/VPS4B/KIFC1/KPNB1/CDT1/CHMP2A/KIF22/NUP62/RAB11A
GOBP_RNA_PHOSPHODIESTER_BOND_HYDROLYSIS	GOBP_RNA_PHOSPHODIESTER_BOND_HYDROLYSIS	138	0.232499	2.1218	1.04532e-05	0.000271192	0.00021548	3187	tags=25%, list=10%, signal=23%	RPS21/LACTB2/EXOSC5/NHP2/APEX1/POP7/RPP40/POLR3K/EXOSC4/RNASEH2A/CSTF2T/NUDT16L1/RRS1/EXOSC3/CNOT7/TSNAX/POP4/RCL1/CNOT8/REXO2/EXD2/CNOT6/FEN1/EXOSC9/CPSF2/CPSF3/PDE12/RPP21/RNASEK/POLR2I/RNASE6/XRN2/DBR1/TSEN34/NCBP2
GOBP_NUCLEOTIDE_EXCISION_REPAIR_PREINCISION_COMPLEX_ASSEMBLY	GOBP_NUCLEOTIDE_EXCISION_REPAIR_PREINCISION_COMPLEX_ASSEMBLY	29	0.478443	2.604	1.06089e-05	0.000274119	0.000217806	3319	tags=48%, list=11%, signal=43%	RPA3/UBB/GTF2H5/RBX1/RAD23B/MNAT1/CETN2/CCNH/GTF2H3/RPS27A/RPA1/CHD1L/RPA2/CUL4A
GOBP_POSITIVE_REGULATION_OF_ACTIN_FILAMENT_BUNDLE_ASSEMBLY	GOBP_POSITIVE_REGULATION_OF_ACTIN_FILAMENT_BUNDLE_ASSEMBLY	58	-0.490429	-2.10432	1.07377e-05	0.000276334	0.000219565	3973	tags=34%, list=13%, signal=30%	APOA1/BAG4/LIMK1/S100A10/SORBS3/ARHGEF10/PPM1F/TPM1/EVL/PAK1/LPAR1/SYNPO2/SMAD3/ID1/FERMT2/RAPGEF3/CX3CL1/TGFB3/SERPINF2/FLNA
GOCC_U2_TYPE_CATALYTIC_STEP_2_SPLICEOSOME	GOCC_U2_TYPE_CATALYTIC_STEP_2_SPLICEOSOME	30	0.470399	2.5758	1.09277e-05	0.000280099	0.000222557	4193	tags=57%, list=13%, signal=49%	PPIL1/SNRPF/SNRPB2/SNRPB/SNRPG/CRNKL1/CDC5L/PLRG1/CWC15/SNRPA1/PPIE/SNRNP40/SNW1/SNRPD2/SNRPD1/SYF2/PRPF8
GOBP_CARDIAC_MUSCLE_CELL_MYOBLAST_DIFFERENTIATION	GOBP_CARDIAC_MUSCLE_CELL_MYOBLAST_DIFFERENTIATION	10	-0.803118	-2.21288	1.12075e-05	0.000286126	0.000227346	1943	tags=60%, list=6%, signal=56%	MYOCD/PRICKLE1/TBX2/SRF/ISL1/NOTCH1
GOBP_OLIGOSACCHARIDE_LIPID_INTERMEDIATE_BIOSYNTHETIC_PROCESS	GOBP_OLIGOSACCHARIDE_LIPID_INTERMEDIATE_BIOSYNTHETIC_PROCESS	21	0.564023	2.75126	1.20465e-05	0.000305595	0.000242815	4434	tags=62%, list=14%, signal=53%	ALG14/ALG1/DOLPP1/ALG6/ALG13/ALG10B/ALG8/ALG9/DPAGT1/MPDU1/DOLK/ALG10/NUS1
GOBP_TRNA_PROCESSING	GOBP_TRNA_PROCESSING	106	0.268535	2.24813	1.20655e-05	0.000305595	0.000242815	3656	tags=29%, list=12%, signal=26%	TRMT112/LAGE3/POP7/RPP40/POLR3K/HSD17B10/TPRKB/LCMT2/POP4/BCDIN3D/GRSF1/C2orf49/THUMPD3/THG1L/CDKAL1/KTI12/METTL6/FTSJ1/TP53RK/CLP1/RPP21/DDX1/ELP4/TRMT5/TSEN34/TYW1/PUS7/NSUN2/DUS4L/TSEN15/TRMT12
GOBP_CELL_JUNCTION_ASSEMBLY	GOBP_CELL_JUNCTION_ASSEMBLY	399	-0.294923	-1.57013	1.2574e-05	0.000317221	0.000252053	4757	tags=23%, list=15%, signal=20%	DUSP3/CDH6/CDH8/CDH2/GPM6B/SFRP1/CDH12/DNM3/EPB41L5/CDH19/DST/OBSL1/IL1RAPL2/PARD6B/PCLO/SNAI2/FARP1/MUSK/CDH18/SPTBN2/SLIT1/S100A10/CLDN22/CORO1C/GAP43/EPHA3/FLRT2/POU4F1/CDH10/CORO2B/EPHA2/LRRN3/OXT/LRP1/GJB6/LRFN4/DLC1/SLC9A1/VEGFA/SLITRK3/IKBKB/AGRN/GJC1/PKP1/PPM1F/LRP4/DLG5/EPHB1/RAMP2/BCL2/MYO9A/NLGN3/NPAS4/CTNND1/SORBS1/VCL/CLASP1/PCDH17/SRF/LRFN5/ITGB4/DAPK3/WNT3A/CAV1/LAMB3/CEL/TRIP6/SDK…
GOBP_NUCLEOSIDE_TRIPHOSPHATE_METABOLIC_PROCESS	GOBP_NUCLEOSIDE_TRIPHOSPHATE_METABOLIC_PROCESS	74	0.308503	2.16266	1.26659e-05	0.000318288	0.0002529	3586	tags=34%, list=11%, signal=30%	RAN/CMPK1/ATP6V1A/DCTPP1/TBPL1/NME5/ENPP3/TYMS/NME7/SMPDL3A/DUT/ALDOA/UCK2/ITPA/GNAI3/NME1/ENO1/VCP/SLC25A13/PID1/PINK1/NUDT2/ENPP1/ENTPD7/IMPDH2
GOBP_SKELETAL_MUSCLE_ORGAN_DEVELOPMENT	GOBP_SKELETAL_MUSCLE_ORGAN_DEVELOPMENT	143	-0.374003	-1.82827	1.41043e-05	0.000353048	0.00028052	3708	tags=25%, list=12%, signal=22%	COL19A1/SMO/PITX1/CNTFR/MYOZ2/DDX17/STRA6/ANKRD1/BTG2/ELN/HLF/HOXD9/BCL9L/P2RX2/MYOCD/KLF5/EPHB1/BCL2/KCNAB1/SVIL/DLL1/ATF3/WNT3A/CAV1/GPC1/NOTCH1/EGR1/MAFF/HOXD10/BIN3/CFLAR/ACTA1/MYOM1/POPDC2/FOS/LMOD3
GOMF_COLLAGEN_BINDING	GOMF_COLLAGEN_BINDING	63	-0.460639	-1.99856	1.48282e-05	0.000369724	0.00029377	5529	tags=37%, list=18%, signal=30%	ANTXR1/SERPINH1/ACHE/MMP13/GP6/PCOLCE2/MUSK/LRRC15/MRC2/COL5A3/C1QTNF1/PAK1/ITGA9/ITGA3/ITGA10/DDR2/SMAD3/COL6A2/CCBE1/CTSB/AEBP1/PODN/COL6A1
GOMF_ACTIN_BINDING	GOMF_ACTIN_BINDING	411	-0.289691	-1.54612	1.52193e-05	0.00037726	0.000299758	3406	tags=18%, list=11%, signal=17%	MYBPC3/SPIRE1/MYOZ2/SPTBN2/HDAC6/SPTBN1/CORO1C/INPPL1/FHL3/GBP1/CORO6/LRRC10/SPTBN4/CROCC/MIB2/MYO1F/CORO2B/CAMK2B/FERMT1/PFN4/PDLIM7/GJB6/PDLIM4/PICK1/CNN2/MYOZ3/MYO18A/TPM1/PKNOX2/MSN/DAAM2/EVL/MYO9A/PALLD/MPRIP/SPTAN1/SVIL/CORO7/SORBS1/BIN1/VCL/CALD1/KCNMA1/SHROOM1/SYNPO2/IPP/MYH3/ENAH/TPM2/VILL/ACTN4/FHOD3/MYLK/TLN1/ZNF185/NEXN/MAP1A/ACTN1/MYO9B/SHANK3/FERMT2/HNRNPU/MYO3B/MYOM1/SMTN/CEACAM1/T…
GOBP_LIPOPROTEIN_METABOLIC_PROCESS	GOBP_LIPOPROTEIN_METABOLIC_PROCESS	123	0.242462	2.04729	1.52482e-05	0.00037726	0.000299758	1307	tags=16%, list=4%, signal=16%	PIGK/LYPLA1/APOC1/LYPLAL1/GPAA1/PIGH/PIGP/DBI/APOE/PIGY/PIGB/PIGF/DPM1/ABHD12/RABL3/ITGAV/CTSD/OLR1/PIGC/DPM3
GOBP_RESPONSE_TO_STEROID_HORMONE	GOBP_RESPONSE_TO_STEROID_HORMONE	311	-0.309994	-1.62567	1.54986e-05	0.00038198	0.000303508	2348	tags=17%, list=7%, signal=16%	PADI2/PAPPA/OXT/CRY2/CARM1/SAFB2/NCOR2/ATP1A2/RXRA/PAQR8/SLIT3/KANK2/BMP7/SCGB2A1/HSD11B2/RAMP2/PER1/BCL2/GNRH1/PAK1/DDIT4/NPAS4/MAOB/ALDH3A1/DUSP1/PTN/ADIPOQ/CAV1/CD38/CATSPER2/SLIT2/FOXO1/FOSL1/ERRFI1/STC1/ISL1/NOTCH1/SERPINF1/SGK1/GSTP1/SCNN1G/IL10/ZFP36/CFLAR/HNRNPU/ACTA1/TGFB3/FOS/IL6/FAM107A/TP63/SCGB1A1/SSTR2/FOSB
GOBP_REGULATION_OF_CELL_SUBSTRATE_ADHESION	GOBP_REGULATION_OF_CELL_SUBSTRATE_ADHESION	202	-0.338202	-1.70715	1.63854e-05	0.000401792	0.000319251	7876	tags=35%, list=25%, signal=26%	MYF5/PLEKHA2/DISC1/CD3E/GCNT2/ARHGAP6/MIR939/PTK2B/SDC4/MYADM/VWC2/FZD7/MIR192/AJAP1/ACVRL1/JAG1/VIT/CCR7/MACF1/DNM2/DUSP3/GPM6B/SFRP1/EPB41L5/APOA1/NF1/UNC13D/FGB/S100A10/CORO1C/EPHA3/GBP1/EGFLAM/CORO2B/FERMT1/LRP1/DLC1/RRAS/SLC9A1/VEGFA/PPM1F/CEACAM6/BCL2/VCL/FBLN1/CLASP1/EFEMP2/DAPK3/FBLN2/PTN/ATXN3/ITGA3/PDPN/ACTN4/SMAD3/NOTCH1/SEMA3E/BCL6/EMILIN1/FOXF1/FERMT2/SERPINE1/CCL21/CX3CL1/OLFM4/COL1…
GOBP_CYTOKINETIC_PROCESS	GOBP_CYTOKINETIC_PROCESS	38	0.406287	2.3974	1.64278e-05	0.000401792	0.000319251	3073	tags=42%, list=10%, signal=38%	CHMP5/ECT2/CHMP2B/CHMP4C/CHMP3/CHMP1B/MITD1/RACGAP1/CEP55/AURKB/VPS4B/KIF20A/CHMP2A/NUP62/ARF1/RHOA
GOBP_LIPID_OXIDATION	GOBP_LIPID_OXIDATION	104	0.263625	2.16311	1.65644e-05	0.000403591	0.00032068	3181	tags=32%, list=10%, signal=29%	SLC27A2/ACSM1/ETFA/AUH/HSD17B4/ADIPOR1/PEX7/PLA2G7/AMACR/HACL1/EHHADH/ACOT8/HSD17B10/ACADM/ACADL/HADHB/DECR1/CPT2/SLC25A17/HADH/ACAT1/MCAT/ECHS1/ETFDH/ACAT2/ACAA1/ALOX15B/DGAT2/APPL2/ETFB/MLYCD/ADH5/PHYH
GOBP_REGULATION_OF_CHROMOSOME_SEGREGATION	GOBP_REGULATION_OF_CHROMOSOME_SEGREGATION	83	0.278458	2.03557	1.66583e-05	0.000404342	0.000321276	2294	tags=23%, list=7%, signal=21%	PTTG3P/CDC20/PTTG1/NSMCE2/PSMG2/BECN1/RIOK2/UBE2C/LCMT1/BUB1/ANAPC7/AURKB/MAD2L1BP/DLGAP5/CSNK2A1/MAD2L2/TACC3/ANAPC5/RB1
GOBP_POLYAMINE_BIOSYNTHETIC_PROCESS	GOBP_POLYAMINE_BIOSYNTHETIC_PROCESS	12	0.685214	2.65771	1.71208e-05	0.000412959	0.000328123	4190	tags=67%, list=13%, signal=58%	SMS/AZIN1/SAT1/SRM/OAZ1/OAZ3/ODC1/OAZ2
GOBP_MITOCHONDRIAL_MEMBRANE_ORGANIZATION	GOBP_MITOCHONDRIAL_MEMBRANE_ORGANIZATION	110	0.25152	2.0012	1.71422e-05	0.000412959	0.000328123	3918	tags=35%, list=12%, signal=30%	TMEM14A/HEBP2/SLC25A5/APOO/YWHAQ/PDCD5/TFDP1/DYNLT1/ALKBH7/YWHAZ/ROMO1/TMEM11/MTX2/BNIP3/MOAP1/BAD/YWHAG/MTX1/OXA1L/TIMM9/HSPA9/CHCHD6/PPP3R1/OMA1/AP3B1/CALM3/AGK/CHCHD3/GHITM/HSP90AA1/PINK1/HSPA4/YWHAB/TIMM10/TIMM8B/SAMM50/TOMM22/BCS1L
GOCC_COPII_VESICLE_COAT	GOCC_COPII_VESICLE_COAT	15	0.644691	2.73034	1.72144e-05	0.000413145	0.000328271	1882	tags=47%, list=6%, signal=44%	SEC23B/PDCD6/SAR1B/TMED7/SEC24D/SEC13/KLHL12
GOCC_PROTEIN_ACETYLTRANSFERASE_COMPLEX	GOCC_PROTEIN_ACETYLTRANSFERASE_COMPLEX	65	0.307509	2.00845	1.75411e-05	0.000419416	0.000333253	2527	tags=23%, list=8%, signal=21%	MORF4L2/ACTL6A/DR1/YEATS4/TAF7/ENY2/TAF2/RUVBL1/POLE4/TAF10/POLE3/RUVBL2/TAF12/TAF9/MORF4L1
GOBP_GLOBAL_GENOME_NUCLEOTIDE_EXCISION_REPAIR	GOBP_GLOBAL_GENOME_NUCLEOTIDE_EXCISION_REPAIR	26	0.49086	2.6099	1.77415e-05	0.000422631	0.000335808	11747	tags=92%, list=37%, signal=58%	UBB/GTF2H5/RBX1/RAD23B/CETN2/GTF2H3/RPS27A/CHD1L/ERCC1/CUL4A/CUL4B/UBC/ERCC3/GTF2H2/ERCC4/GTF2H1/USP45/RNF111/PARP1/UBA52/GTF2H4/DDB2/XPA/DDB1
GOBP_REGULATION_OF_TRANSLATIONAL_INITIATION	GOBP_REGULATION_OF_TRANSLATIONAL_INITIATION	76	0.287812	2.04827	1.83477e-05	0.000435452	0.000345996	3660	tags=36%, list=12%, signal=31%	TMED2/NCK1/BANK1/CDC123/YTHDF3/PPP1CA/RPL13A/POLR2D/EIF1B/EIF4H/EIF2AK3/EIF3H/EIF2B2/EIF4G2/RBM4/YTHDF2/KHDRBS1/DDX1/METTL3/POLR2G/EIF3K/EIF4B/NCBP2/EIF4EBP2/DHX29/MIF4GD/PAIP2
GOBP_INNATE_IMMUNE_RESPONSE_ACTIVATING_SIGNAL_TRANSDUCTION	GOBP_INNATE_IMMUNE_RESPONSE_ACTIVATING_SIGNAL_TRANSDUCTION	115	0.244183	2.02165	1.85522e-05	0.00043868	0.000348561	2610	tags=23%, list=8%, signal=21%	PSMC4/PSMA3/PSMD6/PSMA6/PSMD10/PSMA5/TYROBP/PSMB5/PSMD14/FFAR2/FCER1G/MUCL1/PSMA1/PSMA4/PSMC2/PSMB4/PSME2/PSMC6/PSMD7/PSMD2/PSMB2/PSMB7/LYN/PSMD5/PSMB1/ICAM3
GOBP_GUANOSINE_CONTAINING_COMPOUND_BIOSYNTHETIC_PROCESS	GOBP_GUANOSINE_CONTAINING_COMPOUND_BIOSYNTHETIC_PROCESS	12	0.682415	2.64685	1.88048e-05	0.000443019	0.000352008	3843	tags=58%, list=12%, signal=51%	GMPS/HPRT1/NME5/NME7/NME1/IMPDH2/NME3
GOBP_POSITIVE_REGULATION_OF_FAT_CELL_DIFFERENTIATION	GOBP_POSITIVE_REGULATION_OF_FAT_CELL_DIFFERENTIATION	60	-0.471955	-2.03132	1.95056e-05	0.000457846	0.000363789	6437	tags=45%, list=21%, signal=36%	SULT1E1/LRP5/INS/SFRP1/ZNF385A/WIF1/LMO3/CCDC3/TFE3/PPARD/CEBPB/HTR2A/CARM1/ZBTB7C/WDFY2/KLF5/MIR21/CREB1/SOX13/BMP7/PIM1/ZC3H12A/ZBTB16/FNDC5/RARRES2/ZFP36/HNRNPU
GOBP_ESTABLISHMENT_OF_PROTEIN_LOCALIZATION_TO_CHROMOSOME	GOBP_ESTABLISHMENT_OF_PROTEIN_LOCALIZATION_TO_CHROMOSOME	20	0.5415	2.588	1.97303e-05	0.000461431	0.000366637	3352	tags=55%, list=11%, signal=49%	CCT2/CCT8/TCP1/CCT7/CCT6A/RUVBL2/CCT5/DKC1/CCT3/CCT4/PIH1D1
GOMF_NUCLEOBASE_CONTAINING_COMPOUND_TRANSMEMBRANE_TRANSPORTER_ACTIVITY	GOMF_NUCLEOBASE_CONTAINING_COMPOUND_TRANSMEMBRANE_TRANSPORTER_ACTIVITY	46	0.36835	2.14964	2.02003e-05	0.000470385	0.000373752	2478	tags=30%, list=8%, signal=28%	ABCC4/SIDT2/SLC33A1/SLC35A3/SLC25A5/SLC35B1/SLC35B2/SLC35B3/SLC25A17/SLC25A4/ABCC11/SLC35A5/SLC35E3/SLC35D2
GOMF_2_IRON_2_SULFUR_CLUSTER_BINDING	GOMF_2_IRON_2_SULFUR_CLUSTER_BINDING	20	0.540411	2.58279	2.026e-05	0.000470385	0.000373752	3964	tags=55%, list=13%, signal=48%	UQCRFS1/ISCA1/SDHB/GLRX2/CIAPIN1/CISD2/GLRX5/NDUFV2/FDX1/ISCA2/CISD1
GOMF_PHOSPHOTRANSFERASE_ACTIVITY_FOR_OTHER_SUBSTITUTED_PHOSPHATE_GROUPS	GOMF_PHOSPHOTRANSFERASE_ACTIVITY_FOR_OTHER_SUBSTITUTED_PHOSPHATE_GROUPS	19	0.559513	2.64919	2.03886e-05	0.000471662	0.000374767	3495	tags=53%, list=11%, signal=47%	CRLS1/CHPT1/PIGF/PTDSS1/AASDHPPT/GNPTAB/PIGO/PIGG/DPAGT1/PIGN
GOBP_ESTABLISHMENT_OF_PROTEIN_LOCALIZATION_TO_TELOMERE	GOBP_ESTABLISHMENT_OF_PROTEIN_LOCALIZATION_TO_TELOMERE	16	0.600955	2.66003	2.15464e-05	0.000496653	0.000394624	2743	tags=56%, list=9%, signal=51%	CCT2/CCT8/TCP1/CCT7/CCT6A/CCT5/DKC1/CCT3/CCT4
GOBP_ERROR_FREE_TRANSLESION_SYNTHESIS	GOBP_ERROR_FREE_TRANSLESION_SYNTHESIS	20	0.538053	2.57152	2.1849e-05	0.000501822	0.000398731	3393	tags=50%, list=11%, signal=45%	RPA3/UBB/RFC4/POLDIP2/PCNA/RPS27A/RPA1/VCP/RPA2/RFC3
GOBP_RRNA_CONTAINING_RIBONUCLEOPROTEIN_COMPLEX_EXPORT_FROM_NUCLEUS	GOBP_RRNA_CONTAINING_RIBONUCLEOPROTEIN_COMPLEX_EXPORT_FROM_NUCLEUS	14	0.651618	2.73464	2.28563e-05	0.000523083	0.000415624	2877	tags=57%, list=9%, signal=52%	RAN/ABCE1/NMD3/RIOK2/RRS1/RPS15/XPO1/NUP88
GOCC_NUCLEOID	GOCC_NUCLEOID	37	0.407913	2.25387	2.31091e-05	0.000526986	0.000418725	2710	tags=35%, list=9%, signal=32%	TFB2M/SLC25A5/SSBP1/FASTKD2/HSD17B10/HADHB/POLDIP2/GRSF1/VDAC1/SHMT2/HSPA9/TUFM/FASTKD5
GOBP_MULTICELLULAR_ORGANISMAL_HOMEOSTASIS	GOBP_MULTICELLULAR_ORGANISMAL_HOMEOSTASIS	487	-0.274443	-1.48051	2.33175e-05	0.000529852	0.000421003	3814	tags=20%, list=12%, signal=17%	CCDC66/RP1/SMO/NF1/PTGES/CRTC1/VSIG1/FOXC2/PPP1R13L/TFE3/CALCA/NAPSA/ILDR2/RPE65/PRLH/CROCC/CEBPB/HTR2A/MFN2/ACOT11/YBX2/AQP2/PER2/GPR55/ADCY5/LPIN1/OXT/GJB6/TCIRG1/NXNL1/PLCL2/VEGFA/WFS1/TFF2/MC4R/TMEM79/EDN2/MUC13/KRT16/ADAM17/MUC4/RBP4/BCL2/CARTPT/ZNF423/SLC27A1/ZNF516/PTH1R/SFTPD/SOX9/CDH3/KDM6B/TP53INP2/VCL/GPR3/ANGPT1/LAMA4/SRF/CFTR/LCN1/DLL1/IL4R/CYP4F12/ADCY3/ADIPOQ/CAV1/CD38/CRTC3/SH3GL2…
GOCC_ROUGH_ENDOPLASMIC_RETICULUM_MEMBRANE	GOCC_ROUGH_ENDOPLASMIC_RETICULUM_MEMBRANE	23	0.498728	2.52981	2.35956e-05	0.000534277	0.000424518	2936	tags=52%, list=9%, signal=47%	SEC61G/SEC61B/RPS26/SSR4/SRP9/ARL6IP1/SRPRB/RPL27/CCDC47/RPS29/TMEM97/RPS28
GOBP_ENDOSOME_ORGANIZATION	GOBP_ENDOSOME_ORGANIZATION	72	0.299169	2.06263	2.47689e-05	0.000558871	0.00044406	3126	tags=28%, list=10%, signal=25%	CHMP5/AQP11/CHMP2B/CHMP4C/CHMP3/TSG101/VPS25/CHMP1B/VPS4B/PI4K2B/TMEM9/STAM/STAM2/CLCN3/CHMP2A/RAB22A/STX6/SCARB2/VTA1/RAB11A
GOBP_PSEUDOURIDINE_SYNTHESIS	GOBP_PSEUDOURIDINE_SYNTHESIS	17	0.579074	2.58073	2.48829e-05	0.000559472	0.000444537	10007	tags=94%, list=32%, signal=64%	NHP2/NOP10/DKC1/RPUSD1/GAR1/PUS7/NAF1/TRUB2/PUSL1/PUS7L/RPUSD2/PUS3/RPUSD4/RPUSD3/TRUB1/PUS10
GOBP_RNA_METHYLATION	GOBP_RNA_METHYLATION	56	0.333984	2.14335	2.77099e-05	0.000620858	0.000493312	16469	tags=93%, list=52%, signal=44%	TFB2M/METTL5/TRMT112/HSD17B10/LCMT2/BCDIN3D/THUMPD3/METTL6/FTSJ1/RBM15B/METTL3/METTL14/TRMT5/NSUN2/TRMT12/WTAP/METTL1/LARP7/FBL/EMG1/MTO1/NSUN4/TFB1M/ALKBH8/NSUN3/TRDMT1/WDR4/TRMT11/RBM15/TARBP1/TRMT6/GTPBP3/TRMT2B/CBLL1/MEPCE/ZC3H13/RNMT/ZCCHC4/METTL4/METTL2A/FDXACB1/TGS1/NOP2/NSUN6/THUMPD2/THADA/TRMT2A/NSUN5/METTL2B/METTL8/TRMT1/FTSJ3
GOMF_INTRAMOLECULAR_TRANSFERASE_ACTIVITY_PHOSPHOTRANSFERASES	GOMF_INTRAMOLECULAR_TRANSFERASE_ACTIVITY_PHOSPHOTRANSFERASES	10	0.758259	2.74595	2.894e-05	0.00064616	0.000513417	3333	tags=70%, list=11%, signal=63%	PGAM1/PGM3/PGM2/PMM1/PGAM4/PGM1/PMM2
GOBP_TRNA_TRANSPORT	GOBP_TRNA_TRANSPORT	34	0.418479	2.38261	2.92192e-05	0.000650128	0.00051657	3209	tags=38%, list=10%, signal=34%	RAN/YBX1/NUP37/TOMM20/SEH1L/SEC13/NUP54/NUP205/NUP35/NUP62/NUP88/NUP153/NUP160
GOMF_ORGANOPHOSPHATE_ESTER_TRANSMEMBRANE_TRANSPORTER_ACTIVITY	GOMF_ORGANOPHOSPHATE_ESTER_TRANSMEMBRANE_TRANSPORTER_ACTIVITY	27	0.454737	2.44583	2.94842e-05	0.000653753	0.00051945	3771	tags=48%, list=12%, signal=42%	ABCC4/SLC33A1/SLC25A5/SLC37A1/SLC35B2/SLC35B3/SLC25A17/SLC25A4/ABCC11/SLC19A1/SLC44A4/SLC25A36/SLC25A6
GOBP_IRON_ION_HOMEOSTASIS	GOBP_IRON_ION_HOMEOSTASIS	82	0.279205	2.01456	2.97097e-05	0.000656481	0.000521618	3516	tags=34%, list=11%, signal=30%	GLRX3/MYC/SLC39A8/BMP6/ATP6V1A/STEAP1/FTL/CAND1/ATP6V1G1/B2M/SRI/BOLA2/SOD1/STEAP2/FTH1/IREB2/STEAP4/CYBRD1/ATP6V0D1/FBXL5/HIF1A/NDFIP1/SLC46A1/NEDD8/PICALM/CCDC115/SLC40A1/NCOA4
GOBP_WATER_SOLUBLE_VITAMIN_METABOLIC_PROCESS	GOBP_WATER_SOLUBLE_VITAMIN_METABOLIC_PROCESS	76	0.282389	2.00968	3.02152e-05	0.000665356	0.00052867	3671	tags=33%, list=12%, signal=29%	MCCC2/CYB5A/LMBRD1/MMADHC/PNPO/PCCB/PDXP/BTD/ACP5/AASDHPPT/FOLR2/AKR1A1/MCCC1/MTHFS/MTHFD2/SHMT2/PSAT1/SLC46A1/GSTO1/SLC19A1/MTHFD1/THTPA/ENPP1/SLC2A1/CD320
GOBP_FATTY_ACID_BETA_OXIDATION	GOBP_FATTY_ACID_BETA_OXIDATION	69	0.302139	2.05391	3.16085e-05	0.000693656	0.000551156	2459	tags=32%, list=8%, signal=29%	SLC27A2/ETFA/AUH/HSD17B4/PEX7/AMACR/EHHADH/ACOT8/HSD17B10/ACADM/ACADL/HADHB/DECR1/CPT2/SLC25A17/HADH/ACAT1/MCAT/ECHS1/ETFDH/ACAT2/ACAA1
GOMF_OXIDOREDUCTASE_ACTIVITY_ACTING_ON_THE_CH_CH_GROUP_OF_DONORS	GOMF_OXIDOREDUCTASE_ACTIVITY_ACTING_ON_THE_CH_CH_GROUP_OF_DONORS	56	0.332507	2.13387	3.20763e-05	0.000701519	0.000557403	4482	tags=48%, list=14%, signal=41%	PTGR1/RETSAT/SDHD/SDHB/ACADM/FASN/TM7SF2/ACADL/AKR1C3/DECR1/SDHC/ACAA1/SDHA/BLVRA/ACAD8/DUS4L/IVD/DHDH/DHCR7/ACOX1/ACAD9/PECR/DUS3L/SRD5A1/DUS1L/DECR2/BLVRB
GOBP_TELOMERE_MAINTENANCE_VIA_TELOMERE_LENGTHENING	GOBP_TELOMERE_MAINTENANCE_VIA_TELOMERE_LENGTHENING	71	0.291202	2.00787	3.30701e-05	0.000720793	0.000572717	3077	tags=32%, list=10%, signal=29%	PTGES3/CCT2/NHP2/CCT8/TELO2/TCP1/CCT7/XRCC5/CCT6A/NOP10/TINF2/DHX36/AURKB/HNRNPA1/HSP90AB1/CCT5/MAPKAPK5/DKC1/CCT3/CCT4/RPA1/PNKP/GAR1
GOBP_EPIBOLY	GOBP_EPIBOLY	28	-0.590702	-2.19427	3.40407e-05	0.000739434	0.000587529	2243	tags=36%, list=7%, signal=33%	FERMT1/ADAM17/CLASP1/COL5A1/HBEGF/PDPN/FERMT2/CEACAM1/ITGA5/FLNA
GOBP_REGULATION_OF_RELEASE_OF_CYTOCHROME_C_FROM_MITOCHONDRIA	GOBP_REGULATION_OF_RELEASE_OF_CYTOCHROME_C_FROM_MITOCHONDRIA	42	0.380255	2.24316	3.47158e-05	0.000751551	0.000597157	3496	tags=33%, list=11%, signal=30%	BIK/PSMD10/PDCD5/MMP9/FAM162A/MLLT11/BNIP3/MOAP1/BAD/PRELID1/TRIAP1/GHITM/PINK1/MFF
GOBP_CELLULAR_IRON_ION_HOMEOSTASIS	GOBP_CELLULAR_IRON_ION_HOMEOSTASIS	67	0.288326	1.91997	3.52328e-05	0.000760174	0.000604009	3516	tags=34%, list=11%, signal=31%	GLRX3/MYC/SLC39A8/BMP6/ATP6V1A/FTL/CAND1/ATP6V1G1/SRI/BOLA2/SOD1/FTH1/IREB2/CYBRD1/ATP6V0D1/FBXL5/HIF1A/NDFIP1/SLC46A1/NEDD8/CCDC115/SLC40A1/NCOA4
GOBP_CELL_GROWTH	GOBP_CELL_GROWTH	436	-0.278245	-1.49006	3.67627e-05	0.000790521	0.000628121	3503	tags=19%, list=11%, signal=17%	LIMK1/LLPH/RASGRP2/PLCE1/EDN1/FLRT1/RGS4/SLIT1/HDAC6/RNF157/CRABP2/PLXNA1/PPARD/BCL11A/SEMA3A/PPP3CB/TRIM46/RPTOR/ZNF639/EXTL3/RGS2/DCBLD2/ULK2/LRP1/CPNE6/TNN/PLXNA4/SLC9A1/VEGFA/MYOCD/CAPRIN2/SLIT3/RUFY3/SESN2/IL9/ADAM17/IGFBP5/SYT17/BCL2/ARHGAP4/PAK1/AKAP13/DCUN1D3/NLGN3/SOX9/SEMA4C/S100A8/NRG3/VCL/SRF/IGFBP4/SEMA6A/WNT3A/TSPYL2/AUTS2/HBEGF/CD38/SEMA3F/SEMA3B/SH3GL2/SLIT2/SMAD3/DACT3/FHL1/RND2/…
GOBP_EXTRACELLULAR_MATRIX_ASSEMBLY	GOBP_EXTRACELLULAR_MATRIX_ASSEMBLY	44	-0.504631	-2.05868	3.77922e-05	0.000807654	0.000641735	1529	tags=52%, list=5%, signal=50%	LAMB1/GAS6/FKBP10/LTBP3/ANTXR1/THSD4/HAPLN2/GPM6B/QSOX1/RAMP2/FBLN5/SOX9/NTN4/CLASP1/EFEMP2/LAMB3/MFAP4/SMAD3/NOTCH1/EMILIN1/PHLDB1/LAMB2/MYH11
GOMF_PROTEIN_DISULFIDE_OXIDOREDUCTASE_ACTIVITY	GOMF_PROTEIN_DISULFIDE_OXIDOREDUCTASE_ACTIVITY	18	0.548735	2.54819	3.78115e-05	0.000807654	0.000641735	3645	tags=56%, list=12%, signal=49%	GLRX3/TXN/SCO2/GLRX2/PTGES2/GLRX5/DNAJC10/SH3BGRL3/TXNRD1/CHCHD4
GOCC_CLATHRIN_COATED_VESICLE_MEMBRANE	GOCC_CLATHRIN_COATED_VESICLE_MEMBRANE	114	0.242155	1.98524	3.79713e-05	0.000808373	0.000642306	3377	tags=29%, list=11%, signal=26%	HLA-DRB1/HLA-DRB5/AP1S1/HLA-DQA1/RAB5A/WNT5A/VAMP7/APOE/HSPA8/CD9/CLINT1/HLA-DRA/MYO6/FZD4/AP2S1/CLTC/HLA-DPA1/ADRB2/DNAJC5/REEP6/HLA-DRB4/AP1M2/VAMP4/HLA-DRB3/NECAP1/SYT1/SCARB2/AP3B1/EGF/M6PR/PICALM/EPN3/AFTPH
GOBP_NEGATIVE_REGULATION_OF_VASCULAR_PERMEABILITY	GOBP_NEGATIVE_REGULATION_OF_VASCULAR_PERMEABILITY	16	-0.678446	-2.15649	3.86213e-05	0.000817641	0.00064967	2864	tags=62%, list=9%, signal=57%	PDE2A/VEGFA/ADORA2A/RAMP2/ANGPT1/SH3GL2/SLIT2/FERMT2/CLDN5/CEACAM1
GOBP_DE_NOVO_PROTEIN_FOLDING	GOBP_DE_NOVO_PROTEIN_FOLDING	38	0.392662	2.317	3.86619e-05	0.000817641	0.00064967	4100	tags=42%, list=13%, signal=37%	HSPE1/PTGES3/CCT2/HSPA8/ENTPD5/FKBP1A/HSPA14/SDF2/TOR1B/HSPA9/HSPD1/TOR1A/DNAJC7/CHCHD4/SDF2L1/ST13
GOBP_PROTEIN_LOCALIZATION_TO_CHROMOSOME	GOBP_PROTEIN_LOCALIZATION_TO_CHROMOSOME	71	0.289173	1.99388	3.92557e-05	0.00082747	0.000657479	3808	tags=35%, list=12%, signal=31%	CCT2/CDCA5/CCT8/TCP1/CCT7/XRCC5/CCT6A/GNL3/TINF2/AURKB/RUVBL2/CENPA/RB1/CCT5/DKC1/CCT3/CDT1/CCT4/RPA1/VCP/RPA2/PIH1D1/PPHLN1/HDAC8/ZW10
GOBP_MESENCHYME_DEVELOPMENT	GOBP_MESENCHYME_DEVELOPMENT	273	-0.30749	-1.59368	4.01302e-05	0.000843129	0.000669921	3702	tags=22%, list=12%, signal=20%	SMO/SNAI2/LAMA5/FOXC2/EDN1/SPRY2/AMELX/SIX2/DDX17/CORO1C/EPHA3/SEMA3A/GATA5/ZFPM2/NOTCH4/PTK7/TCF7L2/BCL9L/ACTG2/MIR21/DLG5/BMP7/SPRY1/BCL2/EFNB1/TBX2/GATA3/SOX9/SEMA4C/CLASP1/SEMA6A/GLIPR2/EDN3/WNT3A/OSR1/ZNF750/SEMA3F/PDPN/SEMA3B/ALDH1A2/IL17RD/FOXF2/SMAD3/DACT3/ISL1/NOTCH1/ACTC1/EDNRA/FOXC1/SEMA3E/FOXF1/FERMT2/AKNA/PHLDB1/DCHS1/ACTA1/TGFB1I1/TGFB3/IL6/TGFBR3/FLNA
GOBP_DEOXYRIBONUCLEOTIDE_BIOSYNTHETIC_PROCESS	GOBP_DEOXYRIBONUCLEOTIDE_BIOSYNTHETIC_PROCESS	14	0.638337	2.6789	4.08894e-05	0.000854931	0.000679299	3366	tags=64%, list=11%, signal=57%	TBPL1/DCTD/RRM2B/TYMS/DUT/RRM1/RRM2/DCK/GUK1
GOBP_MORPHOGENESIS_OF_AN_EPITHELIAL_SHEET	GOBP_MORPHOGENESIS_OF_AN_EPITHELIAL_SHEET	51	-0.477698	-2.00543	4.10154e-05	0.000854931	0.000679299	2243	tags=27%, list=7%, signal=26%	FERMT1/ADAM17/BMP7/CLASP1/SRF/COL5A1/HBEGF/PDPN/NOTCH1/FLRT3/FERMT2/CEACAM1/ITGA5/FLNA
GOBP_REGULATION_OF_PROTEASOMAL_UBIQUITIN_DEPENDENT_PROTEIN_CATABOLIC_PROCESS	GOBP_REGULATION_OF_PROTEASOMAL_UBIQUITIN_DEPENDENT_PROTEIN_CATABOLIC_PROCESS	121	0.233472	2.04785	4.10922e-05	0.000854931	0.000679299	2549	tags=20%, list=8%, signal=18%	SDCBP/CDC20/UCHL5/TRIB3/SUMO2/RNF144B/AURKA/PSMD10/PBK/RBX1/CEBPA/RAD23B/MAPK9/STUB1/SMARCC1/TRIB1/PARK7/EIF3H/UBQLN1/RNF14/HSP90AB1/MTM1/TAF9/XPO1
GOBP_GASTRULATION	GOBP_GASTRULATION	168	-0.346642	-1.72272	4.19817e-05	0.000870611	0.000691758	1703	tags=18%, list=5%, signal=17%	DKK1/TBX19/BMP7/KDM6B/ITGA7/WNT5B/CLASP1/SRF/COL4A2/ITGB4/WNT3A/DUSP1/OSR1/ITGA3/ADIPOQ/COL5A1/LAMB3/SMAD3/NPHP3/FOXC1/IL10/FOXF1/PHLDB1/LRP5L/ATOH8/ITGA5/DUSP5/COL6A1/ITGA8/COL7A1
GOBP_RESPONSE_TO_KETONE	GOBP_RESPONSE_TO_KETONE	190	-0.335287	-1.68198	4.25026e-05	0.000878569	0.000698081	2323	tags=18%, list=7%, signal=17%	ADCY5/OXT/HOXD13/KIF1B/SLIT3/MSN/RAMP2/GNRH1/DDIT4/NPAS4/MAOB/TNC/CFTR/ADCY3/DUSP1/AHR/PTN/CAV1/CD38/CATSPER2/SLIT2/FOXO1/FOSL1/ERRFI1/KLF2/SERPINF1/SGK1/SCNN1G/CFLAR/CCL21/TGFB3/FOS/TGFBR3/FOSB
GOBP_REGULATION_OF_FATTY_ACID_OXIDATION	GOBP_REGULATION_OF_FATTY_ACID_OXIDATION	30	-0.554691	-2.09548	4.2674e-05	0.000879276	0.000698643	2894	tags=33%, list=9%, signal=30%	ABCB11/PPARD/FABP3/SOX9/IRS1/ABCD1/PPARGC1A/PLIN5/ACACB/PDK4
GOBP_PROTEIN_K11_LINKED_UBIQUITINATION	GOBP_PROTEIN_K11_LINKED_UBIQUITINATION	27	0.44692	2.40379	4.30647e-05	0.000884395	0.00070271	2561	tags=37%, list=8%, signal=34%	UBE2T/ANAPC10/ANAPC13/UBE2C/ANAPC7/UBE2E2/UBE2H/ANAPC5/UBE2D3/RNF4
GOCC_HOST_CELLULAR_COMPONENT	GOCC_HOST_CELLULAR_COMPONENT	54	0.327251	2.09943	4.31985e-05	0.000884395	0.00070271	3757	tags=39%, list=12%, signal=34%	RAN/UBB/TSG101/NUP37/DYNLT1/SEH1L/SEC13/KPNA1/NUP54/KPNB1/XPO1/RPS27A/NUP205/NUP35/NUP62/NUP88/NUP153/NUP160/UBAP1/NUP85/VPS28
GOBP_POSITIVE_REGULATION_OF_DNA_BIOSYNTHETIC_PROCESS	GOBP_POSITIVE_REGULATION_OF_DNA_BIOSYNTHETIC_PROCESS	62	0.320731	2.07355	4.33948e-05	0.000885585	0.000703656	3913	tags=40%, list=12%, signal=35%	MYC/PTGES3/CCT2/CCT8/TCP1/CCT7/XRCC5/CCT6A/RFC4/PCNA/AURKB/HNRNPA1/HSP90AB1/CCT5/MAPKAPK5/DKC1/CCT3/CCT4/PNKP/HSP90AA1/RFC3/NAF1/GRHL2/SMOC2/PKIB
GOMF_MACROMOLECULE_TRANSMEMBRANE_TRANSPORTER_ACTIVITY	GOMF_MACROMOLECULE_TRANSMEMBRANE_TRANSPORTER_ACTIVITY	24	0.48477	2.49617	4.36246e-05	0.000887449	0.000705137	2027	tags=25%, list=6%, signal=23%	TMED10/SIDT2/SEC61G/TOMM20/TIMM23/ABCA1
GOCC_MHC_CLASS_II_PROTEIN_COMPLEX	GOCC_MHC_CLASS_II_PROTEIN_COMPLEX	16	0.580454	2.56928	4.46804e-05	0.000906051	0.000719917	2307	tags=44%, list=7%, signal=41%	HLA-DRB1/HLA-DRB5/HLA-DQA1/HLA-DRA/HLA-DPA1/HLA-DRB4/HLA-DRB3
GOBP_UBIQUITIN_DEPENDENT_ERAD_PATHWAY	GOBP_UBIQUITIN_DEPENDENT_ERAD_PATHWAY	73	0.280721	1.93447	4.52715e-05	0.000915141	0.00072714	3993	tags=40%, list=13%, signal=35%	STT3B/EDEM1/SEL1L/SEC61B/RNF103/DERL1/FBXO6/UBXN8/DNAJB9/STUB1/DNAJC10/UBQLN1/PSMC6/EDEM2/TRIM25/CCDC47/DERL2/OS9/HSP90B1/VCP/UBQLN2/AMFR/BCAP31/UBXN4/HERPUD1/UBE4A/UBE4B/RNF5/UBE2J1
GOMF_NUCLEOSIDE_TRIPHOSPHATE_DIPHOSPHATASE_ACTIVITY	GOMF_NUCLEOSIDE_TRIPHOSPHATE_DIPHOSPHATASE_ACTIVITY	10	0.744837	2.69734	4.64679e-05	0.000936372	0.000744009	8017	tags=100%, list=26%, signal=74%	DCTPP1/ENPP3/DUT/ITPA/ENPP1/NUDT15/NUDT1/DHX9/NUDT16/ASMTL
GOBP_NEGATIVE_REGULATION_OF_UBIQUITIN_DEPENDENT_PROTEIN_CATABOLIC_PROCESS	GOBP_NEGATIVE_REGULATION_OF_UBIQUITIN_DEPENDENT_PROTEIN_CATABOLIC_PROCESS	44	0.374649	2.19964	4.95655e-05	0.000994354	0.00079008	2521	tags=30%, list=8%, signal=27%	RPS7/SDCBP/UCHL5/PBK/PDCL3/SMARCC1/PARK7/EIF3H/CSNK2A1/RPL23/HSP90AB1/MTM1/TAF9
GOBP_ENDOPLASMIC_RETICULUM_TO_CYTOSOL_TRANSPORT	GOBP_ENDOPLASMIC_RETICULUM_TO_CYTOSOL_TRANSPORT	25	0.462469	2.44304	4.96557e-05	0.000994354	0.00079008	3993	tags=48%, list=13%, signal=42%	EDEM1/SEL1L/SEC61B/DERL1/EDEM2/DERL2/OS9/HSP90B1/VCP/BCAP31/HERPUD1/UBE2J1
GOBP_NADPH_REGENERATION	GOBP_NADPH_REGENERATION	16	0.577517	2.55628	5.01976e-05	0.00100207	0.000796215	3809	tags=56%, list=12%, signal=49%	IDH1/PGAM1/PGD/PGM2/PGLS/RBKS/RPE/TKT/SHPK
GOBP_NEGATIVE_REGULATION_OF_PROTEOLYSIS_INVOLVED_IN_CELLULAR_PROTEIN_CATABOLIC_PROCESS	GOBP_NEGATIVE_REGULATION_OF_PROTEOLYSIS_INVOLVED_IN_CELLULAR_PROTEIN_CATABOLIC_PROCESS	58	0.320499	2.0443	5.06103e-05	0.00100406	0.000797796	2521	tags=26%, list=8%, signal=24%	RPS7/SDCBP/UCHL5/AQP11/PBK/PDCL3/GABARAPL2/SMARCC1/PARK7/EIF3H/CSNK2A1/RPL23/HSP90AB1/MTM1/TAF9
GOCC_CATALYTIC_STEP_2_SPLICEOSOME	GOCC_CATALYTIC_STEP_2_SPLICEOSOME	78	0.285561	2.04033	5.06106e-05	0.00100406	0.000797796	4056	tags=42%, list=13%, signal=37%	SNRPN/LSM3/PPIL1/SNRPF/SYNCRIP/SNRPB2/LSM7/SNRPB/HNRNPR/HNRNPK/MAGOH/HNRNPA1/SNRPG/EIF4A3/CRNKL1/CDC5L/PLRG1/PRPF6/CWC15/RBMX/SNRPA1/PPIE/HNRNPM/HNRNPA3/LSM2/SNRNP40/SNW1/HNRNPH1/SF3B1/SNRPD2/SNRPD1/SYF2/ISY1
GOCC_I_BAND	GOCC_I_BAND	131	-0.363807	-1.76638	5.30073e-05	0.00104837	0.000832997	3595	tags=25%, list=11%, signal=22%	KRT19/MYOZ2/JPH2/FHL3/ANKRD1/PPP3CB/FBXL22/BAG3/FHL2/PDLIM7/PDLIM4/MYOZ3/KCNA5/CACNA1C/PALLD/PAK1/OBSCN/BIN1/SYNPO2/FHOD3/CSRP1/ACTC1/ATP2B4/NEXN/ACTN1/FERMT2/PGM5/CRYAB/MYL9/AHNAK2/DES/FLNA/FLNC
GOBP_NUCLEOSIDE_TRIPHOSPHATE_CATABOLIC_PROCESS	GOBP_NUCLEOSIDE_TRIPHOSPHATE_CATABOLIC_PROCESS	13	0.660707	2.61594	5.39903e-05	0.00106452	0.000845834	10659	tags=100%, list=34%, signal=66%	DCTPP1/ENPP3/SMPDL3A/DUT/ITPA/ENPP1/ENTPD7/NUDT15/NUDT1/NUDT16/ADA/SAMHD1/ENTPD3
GOCC_RNA_POLYMERASE_II_CORE_COMPLEX	GOCC_RNA_POLYMERASE_II_CORE_COMPLEX	14	0.62522	2.62386	5.43672e-05	0.00106867	0.000849126	3392	tags=71%, list=11%, signal=64%	POLR2B/POLR2J3/POLR2D/POLR2H/POLR2J2/POLR2F/POLR2L/POLR2I/POLR2G/POLR2K
GOBP_FORMATION_OF_PRIMARY_GERM_LAYER	GOBP_FORMATION_OF_PRIMARY_GERM_LAYER	109	-0.386663	-1.83648	5.47633e-05	0.00107243	0.000852114	2293	tags=21%, list=7%, signal=20%	EPHA2/DKK1/TBX19/BMP7/KDM6B/ITGA7/SRF/COL4A2/ITGB4/WNT3A/DUSP1/ITGA3/COL5A1/LAMB3/SMAD3/FOXC1/FOXF1/ATOH8/ITGA5/DUSP5/COL6A1/ITGA8/COL7A1
GOMF_CHAPERONE_BINDING	GOMF_CHAPERONE_BINDING	94	0.251967	1.8708	5.48933e-05	0.00107243	0.000852114	4100	tags=37%, list=13%, signal=32%	HSPE1/PTGES3/TBCC/HSPA8/ERP29/ATP7A/SLC25A17/DNAJB9/GRN/STUB1/TBCA/DNAJB6/DNAJC10/GRPEL2/SOD1/TIMM9/ALB/DNAJA1/GRPEL1/TBCE/SLC12A2/CDKN1B/PFDN6/DNAJA4/HSPD1/AHSA1/FNIP1/HLA-B/AMFR/TIMM10/BIRC5/CTSC/SDF2L1/DNAJC3/ST13
GOBP_METAPHASE_PLATE_CONGRESSION	GOBP_METAPHASE_PLATE_CONGRESSION	56	0.321968	2.06623	5.56935e-05	0.00108475	0.000861909	3126	tags=34%, list=10%, signal=31%	CHMP5/CHMP2B/CHMP4C/CDCA5/CHMP1B/BECN1/SEH1L/RRS1/FAM83D/AURKB/VPS4B/KIFC1/MLH1/KPNB1/CDT1/CHMP2A/KIF22/NUP62/RAB11A
GOMF_THREONINE_TYPE_ENDOPEPTIDASE_ACTIVITY	GOMF_THREONINE_TYPE_ENDOPEPTIDASE_ACTIVITY	13	0.659131	2.60971	5.65818e-05	0.00109872	0.000873002	4584	tags=77%, list=15%, signal=66%	PSMB5/PSMA4/PSMB4/PSMB2/PSMB7/PSMB1/PSMB6/TASP1/PSMB9/PSMB3
GOBP_INTEGRIN_MEDIATED_SIGNALING_PATHWAY	GOBP_INTEGRIN_MEDIATED_SIGNALING_PATHWAY	99	-0.391468	-1.82962	5.77331e-05	0.00111768	0.000888074	5010	tags=27%, list=16%, signal=23%	SEMA7A/ISG15/LAT/ITGB8/DST/APOA1/FGR/LAMA5/ITGA2B/FERMT1/ITGA7/ITGA9/ITGB4/PTN/ITGA3/ITGA10/ZYX/TLN1/ADAMTS1/FERMT2/CEACAM1/COL16A1/LIMS2/CD177/ITGA5/FLNA/ITGA8
GOBP_REGULATION_OF_ACTIN_FILAMENT_BASED_PROCESS	GOBP_REGULATION_OF_ACTIN_FILAMENT_BASED_PROCESS	358	-0.288857	-1.5314	5.80958e-05	0.00112132	0.000890962	5065	tags=24%, list=16%, signal=21%	HIP1R/KANK3/FER/PLN/MIR214/CDC42EP4/FCHSD1/GPM6B/SFRP1/SSH3/SIGLEC15/ARFIP2/AVIL/APOA1/BAG4/LIMK1/CELSR1/MYBPC3/SPIRE1/EDN1/SPTBN2/RGS4/CCL26/SPTBN1/S100A10/TAOK1/EPHA3/NTF3/SPTBN4/ELN/ARAP1/CORO2B/SORBS3/PFN4/LRP1/ATP1A2/PICK1/DLC1/SLC9A1/ARHGEF10/RHOBTB2/CNN2/CGNL1/PPM1F/MIR21/TPM1/EVL/CDK10/CACNA1C/PAK1/AKAP13/SPTAN1/ASAP3/SVIL/BIN1/LPAR1/CLASP1/DAPK3/SYNPO2/CAV1/RHOB/PDPN/RND3/VILL/FES/SLIT2/…
GOCC_PROTEASOME_REGULATORY_PARTICLE_BASE_SUBCOMPLEX	GOCC_PROTEASOME_REGULATORY_PARTICLE_BASE_SUBCOMPLEX	12	0.652884	2.53232	5.85793e-05	0.00112726	0.000895679	2577	tags=50%, list=8%, signal=46%	PSMC4/PSMD10/PSMC2/PSMC6/PSMD2/PSMD5
GOCC_COMPLEX_OF_COLLAGEN_TRIMERS	GOCC_COMPLEX_OF_COLLAGEN_TRIMERS	21	-0.614601	-2.12567	6.04005e-05	0.00115882	0.000920761	4552	tags=48%, list=15%, signal=41%	COL4A4/COL4A1/COL27A1/COL5A3/COL4A6/COL4A5/COL4A2/COL5A1/COL16A1/COL7A1
GOMF_ENDOPEPTIDASE_ACTIVATOR_ACTIVITY	GOMF_ENDOPEPTIDASE_ACTIVATOR_ACTIVITY	10	0.73731	2.67008	6.07655e-05	0.00116234	0.000923559	3696	tags=70%, list=12%, signal=62%	PSMD14/APH1B/PSME2/PSENEN/PSME3/APH1A/ADRM1
GOMF_GDP_BINDING	GOMF_GDP_BINDING	72	0.289328	1.99479	6.09484e-05	0.00116237	0.000923582	3644	tags=36%, list=12%, signal=32%	RAN/RAB9A/RAB5A/RAB18/RAB2A/SUCLG2/SRP54/RHEB/RAP2A/RAB4A/RAB10/RRAS2/RAB5C/ARL8B/GNAI3/RAB17/RALB/RAB21/RAB22A/ARF1/PRPS2/RIT1/KRAS/RAP2C/RAP1BL/RAB28
GOBP_ASPARTATE_FAMILY_AMINO_ACID_METABOLIC_PROCESS	GOBP_ASPARTATE_FAMILY_AMINO_ACID_METABOLIC_PROCESS	45	0.355256	2.10162	6.13072e-05	0.00116575	0.000926262	1642	tags=22%, list=5%, signal=21%	SMS/ENOPH1/APIP/GNMT/NIT2/DLD/ASNSD1/ALDH7A1/AASDHPPT/ADI1
GOBP_PURINE_NUCLEOSIDE_BIOSYNTHETIC_PROCESS	GOBP_PURINE_NUCLEOSIDE_BIOSYNTHETIC_PROCESS	20	0.510499	2.43984	6.57951e-05	0.00124691	0.00099075	9027	tags=85%, list=29%, signal=61%	GMPS/HPRT1/APRT/NME5/NME7/NME1/IMPDH2/NME3/ADK/NME4/NME6/IMPDH1/NME2/AMD1/ADAL/MTAP/ADA
GOBP_LYSOSOMAL_LUMEN_ACIDIFICATION	GOBP_LYSOSOMAL_LUMEN_ACIDIFICATION	10	0.735213	2.66249	6.59646e-05	0.00124691	0.00099075	3694	tags=70%, list=12%, signal=62%	SNAPIN/GRN/ATP6AP2/TMEM9/CCDC115/PPT1/TMEM199
GOBP_MITOTIC_CYTOKINESIS	GOBP_MITOTIC_CYTOKINESIS	69	0.291519	1.98172	6.68082e-05	0.00125914	0.00100047	3073	tags=28%, list=10%, signal=25%	CHMP5/ECT2/CHMP2B/NUSAP1/CHMP4C/CHMP3/CHMP1B/MITD1/JTB/RACGAP1/CEP55/VPS4B/CENPA/KIF20A/KIF4A/CHMP2A/NUP62/ARF1/RHOA
GOBP_VIRAL_BUDDING	GOBP_VIRAL_BUDDING	24	0.47227	2.4318	6.71209e-05	0.00126132	0.0010022	3014	tags=38%, list=10%, signal=34%	CHMP5/CHMP2B/CHMP4C/CHMP3/TSG101/CHMP1B/VPS4B/CHMP2A/VTA1
GOBP_CELLULAR_COMPONENT_ASSEMBLY_INVOLVED_IN_MORPHOGENESIS	GOBP_CELLULAR_COMPONENT_ASSEMBLY_INVOLVED_IN_MORPHOGENESIS	95	-0.398347	-1.85398	6.74062e-05	0.00126298	0.00100352	1631	tags=22%, list=5%, signal=21%	TPM1/RFX2/AKAP13/OBSCN/CLASP1/SRF/ITGB4/MYH3/GPC1/FHOD3/CNTNAP1/CSRP1/ACTC1/CFLAR/CCDC136/PHLDB1/ACTA1/PGM5/LMOD1/LMOD3/MYH11
GOCC_PRERIBOSOME_LARGE_SUBUNIT_PRECURSOR	GOCC_PRERIBOSOME_LARGE_SUBUNIT_PRECURSOR	23	0.479877	2.43419	6.77412e-05	0.00126556	0.00100557	4025	tags=52%, list=13%, signal=46%	WDR12/EBNA1BP2/RRS1/RPF1/NIP7/RRP15/NSA2/ZNF622/BOP1/MAK16/RRP1B/WDR37
GOMF_ISOPRENOID_BINDING	GOMF_ISOPRENOID_BINDING	38	-0.514119	-2.03784	6.89999e-05	0.00128532	0.00102128	6246	tags=47%, list=20%, signal=38%	ADH4/CYP27C1/C8G/LCN12/OPN4/ADH7/RLBP1/CRABP2/STRA6/CRABP1/UGT1A7/RXRA/RARA/RBP4/SERPINA5/RBP1/ALDH1A2/PTGDS
GOBP_FATTY_ACID_DERIVATIVE_METABOLIC_PROCESS	GOBP_FATTY_ACID_DERIVATIVE_METABOLIC_PROCESS	76	0.272259	1.93759	7.22048e-05	0.00134113	0.00106561	3452	tags=37%, list=11%, signal=33%	ELOVL5/PTGR1/HSD17B4/ACSL1/HPGD/AACS/OXCT1/FASN/ACLY/ELOVL2/ACAT1/ACSL3/SLC25A1/CYP4F11/HSD17B8/SLC27A5/CBR4/ALOX15B/HSD17B12/DGAT2/SCD/ALOX5AP/LYPLA2/ELOVL6/PPT1/HMGCS2/ELOVL7/ELOVL1
GOBP_REGULATION_OF_CYTOSKELETON_ORGANIZATION	GOBP_REGULATION_OF_CYTOSKELETON_ORGANIZATION	463	-0.275925	-1.48354	7.38884e-05	0.00136463	0.00108429	3503	tags=18%, list=11%, signal=17%	LIMK1/CELSR1/SPIRE1/EDN1/SPTBN2/RGS4/CCL26/HDAC6/SPTBN1/S100A10/TAOK1/EPHA3/NTF3/SPTBN4/ELN/ARAP1/CORO2B/SORBS3/MYCBP2/PFN4/EML3/LRP1/PICK1/DLC1/SLC9A1/NUMA1/ARHGEF10/RHOBTB2/CEP97/CGNL1/PPM1F/MIR21/TPM1/EVL/CDK10/CENPJ/PAK1/AKAP13/CHMP1A/SPTAN1/ASAP3/SVIL/S100A8/BIN1/LPAR1/CLASP1/DAPK3/WNT3A/SYNPO2/RHOB/ARHGEF2/RND3/VILL/FES/SLIT2/CAPN6/SYDE1/FHOD3/SMAD3/RND2/CDC42EP5/ID1/JAM3/BST2/SEMA3E/NEXN/M…
GOBP_MULTIVESICULAR_BODY_SORTING_PATHWAY	GOBP_MULTIVESICULAR_BODY_SORTING_PATHWAY	33	0.392735	2.23548	7.38961e-05	0.00136463	0.00108429	3341	tags=42%, list=11%, signal=38%	CHMP5/CHMP2B/CHMP4C/CHMP3/VPS25/CHMP1B/VPS4B/STAM/CHMP2A/LEPROTL1/VTA1/TMEM50A/VCP/UBXN6
GOCC_TRANS_GOLGI_NETWORK_MEMBRANE	GOCC_TRANS_GOLGI_NETWORK_MEMBRANE	86	0.263218	1.92217	7.53874e-05	0.00138817	0.00110299	3535	tags=31%, list=11%, signal=28%	HLA-DRB1/HLA-DRB5/AP1S1/HLA-DQA1/RAB9A/HLA-DRA/CLTC/RAB6A/HLA-DPA1/GOLPH3L/RABEPK/COG5/ARL1/HLA-DRB4/AP1M2/VAMP4/HLA-DRB3/SCAMP3/TMEM165/COG3/STX6/SYS1/M6PR/AFTPH/APP/AP1S2/CLTA
GOCC_ESCRT_COMPLEX	GOCC_ESCRT_COMPLEX	23	0.477625	2.42276	7.61338e-05	0.00139789	0.00111072	3757	tags=48%, list=12%, signal=42%	CHMP2B/CHMP4C/CHMP3/TSG101/VPS25/CHMP1B/STAM/STAM2/CHMP2A/UBAP1/VPS28
GOCC_CYTOPLASMIC_UBIQUITIN_LIGASE_COMPLEX	GOCC_CYTOPLASMIC_UBIQUITIN_LIGASE_COMPLEX	14	0.61489	2.58051	7.79681e-05	0.00142748	0.00113423	3815	tags=64%, list=12%, signal=56%	SEL1L/DERL1/RBX1/ATG3/DERL2/OS9/USP33/FAM8A1/CUL2
GOBP_INTRA_GOLGI_VESICLE_MEDIATED_TRANSPORT	GOBP_INTRA_GOLGI_VESICLE_MEDIATED_TRANSPORT	31	0.409362	2.26342	7.89161e-05	0.00144072	0.00114475	2757	tags=39%, list=9%, signal=35%	COPB2/COPZ1/COPB1/COPE/GOLGA5/GABARAPL2/COPA/RAB6A/COG5/NSF/COG3/GOSR1
GOBP_MYOFIBRIL_ASSEMBLY	GOBP_MYOFIBRIL_ASSEMBLY	58	-0.462449	-1.98426	8.12498e-05	0.00147912	0.00117526	3902	tags=47%, list=12%, signal=41%	NRAP/MYPN/CFL2/MIR1-1/PDGFRA/MYH6/CAPN3/TMOD1/OBSL1/KRT19/MYOZ2/EDN1/ANKRD1/TPM1/AKAP13/OBSCN/SRF/MYH3/FHOD3/CSRP1/ACTC1/CFLAR/ACTA1/PGM5/LMOD1/LMOD3/MYH11
GOBP_REGULATION_OF_MITOCHONDRION_ORGANIZATION	GOBP_REGULATION_OF_MITOCHONDRION_ORGANIZATION	140	0.219474	1.99912	8.17565e-05	0.00148412	0.00117923	3652	tags=29%, list=12%, signal=25%	TMEM14A/BIK/PRMT6/GOLPH3/SLC25A5/PSMD10/YWHAQ/PDCD5/MMP9/FAM162A/TFDP1/HAX1/MLLT11/CAMKK2/YWHAZ/HTRA2/BNIP3/MOAP1/BAD/YWHAG/PARK7/VDAC1/VPS35/DCN/FIS1/PRELID1/TSPO/HIF1A/TMEM135/PPP3R1/OMA1/TRIAP1/GHITM/RNF41/PID1/FNIP1/PINK1/MFF/PLD6/YWHAB
GOCC_ENDOPLASMIC_RETICULUM_GOLGI_INTERMEDIATE_COMPARTMENT_MEMBRANE	GOCC_ENDOPLASMIC_RETICULUM_GOLGI_INTERMEDIATE_COMPARTMENT_MEMBRANE	65	0.289374	1.89	8.28769e-05	0.00150021	0.00119202	2519	tags=22%, list=8%, signal=20%	TMED10/BET1/TMED5/TMED2/F5/TMED7/RAB2A/TMED9/SURF4/YIF1A/TMED3/LMAN1/SEC22B/ERGIC3
GOCC_PHAGOCYTIC_VESICLE_MEMBRANE	GOCC_PHAGOCYTIC_VESICLE_MEMBRANE	74	0.285129	1.99881	8.65499e-05	0.00156229	0.00124134	3030	tags=27%, list=10%, signal=24%	RAB9A/RAB5A/ANXA3/VAMP7/LAMP2/ATP6V0B/PIK3R4/SNAP23/B2M/RAB20/ATP7A/RAB10/ATP6V0E2/ATP6V0E1/RAB32/ATP6V0D1/SEC22B/OCRL/RAB22A/APPL2
GOBP_MESENCHYMAL_CELL_DIFFERENTIATION	GOBP_MESENCHYMAL_CELL_DIFFERENTIATION	222	-0.320915	-1.63145	8.87303e-05	0.00159715	0.00126904	3702	tags=23%, list=12%, signal=21%	SMO/SNAI2/LAMA5/FOXC2/EDN1/SPRY2/AMELX/SIX2/DDX17/CORO1C/EPHA3/SEMA3A/GATA5/NOTCH4/TCF7L2/BCL9L/MIR21/DLG5/BMP7/SPRY1/BCL2/EFNB1/GATA3/SOX9/SEMA4C/CLASP1/SEMA6A/GLIPR2/EDN3/OSR1/ZNF750/SEMA3F/PDPN/SEMA3B/ALDH1A2/IL17RD/FOXF2/SMAD3/DACT3/ISL1/NOTCH1/EDNRA/FOXC1/SEMA3E/FERMT2/AKNA/PHLDB1/TGFB1I1/TGFB3/IL6/TGFBR3/FLNA
GOBP_PROTEIN_EXIT_FROM_ENDOPLASMIC_RETICULUM	GOBP_PROTEIN_EXIT_FROM_ENDOPLASMIC_RETICULUM	42	0.365193	2.15431	8.93802e-05	0.00160083	0.00127197	3993	tags=38%, list=13%, signal=33%	EDEM1/SAR1B/SEL1L/SEC61B/DERL1/SEC13/EDEM2/TMEM30B/DERL2/OS9/HSP90B1/VCP/PREB/BCAP31/HERPUD1/UBE2J1
GOBP_REGULATION_OF_UBIQUITIN_PROTEIN_TRANSFERASE_ACTIVITY	GOBP_REGULATION_OF_UBIQUITIN_PROTEIN_TRANSFERASE_ACTIVITY	53	0.326877	2.09017	8.94348e-05	0.00160083	0.00127197	3424	tags=30%, list=11%, signal=27%	RPS7/CDC20/TRIB3/RPS2/DCUN1D5/UBE2N/UBE2C/STUB1/PARK7/BMI1/RPL23/MAD2L2/MAD2L1/ARRDC4/DTX3L/PINK1
GOCC_MICROBODY_LUMEN	GOCC_MICROBODY_LUMEN	50	0.339134	2.07647	9.06491e-05	0.00161805	0.00128565	3364	tags=36%, list=11%, signal=32%	IDH1/HSD17B4/PEX7/AMACR/HACL1/EHHADH/ACOT8/CAT/GNPAT/GRHPR/PRDX5/IDE/ACAA1/ACOT4/MLYCD/PHYH/ACOT2/ECH1
GOBP_PIGMENT_BIOSYNTHETIC_PROCESS	GOBP_PIGMENT_BIOSYNTHETIC_PROCESS	53	0.325017	2.07828	9.33515e-05	0.00166166	0.0013203	2377	tags=23%, list=8%, signal=21%	GMPS/PRPS1/HPRT1/WNT5A/PPAT/DDT/APRT/SLC25A39/HMBS/SHMT2/IREB2/TSPO
GOMF_HYDRO_LYASE_ACTIVITY	GOMF_HYDRO_LYASE_ACTIVITY	53	0.324735	2.07647	9.46571e-05	0.00168023	0.00133505	2682	tags=32%, list=9%, signal=29%	AUH/HSD17B4/APIP/CA2/PCBD1/EHHADH/GMDS/FASN/HADHB/ACO2/PARK7/ECHS1/IREB2/CYP1B1/ENOSF1/FH/ENO1
GOMF_PROTEIN_DISULFIDE_ISOMERASE_ACTIVITY	GOMF_PROTEIN_DISULFIDE_ISOMERASE_ACTIVITY	17	0.543071	2.42028	9.57353e-05	0.00169104	0.00134365	1034	tags=29%, list=3%, signal=28%	PIGK/PDIA6/PDIA5/TXNDC5/GLRX2
GOBP_POSITIVE_REGULATION_OF_RELEASE_OF_CYTOCHROME_C_FROM_MITOCHONDRIA	GOBP_POSITIVE_REGULATION_OF_RELEASE_OF_CYTOCHROME_C_FROM_MITOCHONDRIA	26	0.450377	2.39465	9.57941e-05	0.00169104	0.00134365	1783	tags=31%, list=6%, signal=29%	BIK/PDCD5/MMP9/FAM162A/MLLT11/BNIP3/MOAP1/BAD
GOBP_ERAD_PATHWAY	GOBP_ERAD_PATHWAY	89	0.263519	1.91169	9.68311e-05	0.00170465	0.00135446	4021	tags=38%, list=13%, signal=33%	STT3B/EDEM1/AQP11/SEL1L/SEC61B/RNF103/DERL1/FBXO6/UBXN8/DNAJB9/STUB1/RNFT1/DNAJC10/UBQLN1/PSMC6/EDEM2/TRIM25/CCDC47/DERL2/OS9/HSP90B1/TOR1A/VCP/UBQLN2/UBXN6/AMFR/BCAP31/UBXN4/HERPUD1/UBE4A/UBE4B/RNF5/UBE2J1/SDF2L1
GOBP_UDP_N_ACETYLGLUCOSAMINE_METABOLIC_PROCESS	GOBP_UDP_N_ACETYLGLUCOSAMINE_METABOLIC_PROCESS	16	0.554988	2.45656	0.000100891	0.00177126	0.00140738	3158	tags=56%, list=10%, signal=51%	GFPT1/SLC35A3/PGM3/GNE/UAP1/GNPDA1/DPAGT1/GNPDA2/GNPNAT1
GOBP_PREASSEMBLY_OF_GPI_ANCHOR_IN_ER_MEMBRANE	GOBP_PREASSEMBLY_OF_GPI_ANCHOR_IN_ER_MEMBRANE	17	0.53977	2.40557	0.000102432	0.00179339	0.00142497	2014	tags=47%, list=6%, signal=44%	PIGH/PIGP/PIGY/PIGB/PIGF/PIGC/PIGM/PIGW
GOBP_CYCLIC_NUCLEOTIDE_CATABOLIC_PROCESS	GOBP_CYCLIC_NUCLEOTIDE_CATABOLIC_PROCESS	14	-0.678508	-2.06859	0.000108602	0.00189625	0.00150669	2874	tags=50%, list=9%, signal=45%	PDE5A/PDE2A/PDE9A/PDE7A/PDE4A/PDE4C/PDE8B
GOCC_STRIATED_MUSCLE_THIN_FILAMENT	GOCC_STRIATED_MUSCLE_THIN_FILAMENT	21	-0.600757	-2.07779	0.000109836	0.00191258	0.00151967	1631	tags=29%, list=5%, signal=27%	TPM1/TPM2/FHOD3/ACTA1/LMOD1/LMOD3
GOBP_POSITIVE_REGULATION_OF_PROTEIN_MODIFICATION_BY_SMALL_PROTEIN_CONJUGATION_OR_REMOVAL	GOBP_POSITIVE_REGULATION_OF_PROTEIN_MODIFICATION_BY_SMALL_PROTEIN_CONJUGATION_OR_REMOVAL	124	0.218447	1.85621	0.000111344	0.00193358	0.00153635	3424	tags=27%, list=11%, signal=25%	CDC20/TRIB3/RPS2/AIMP2/PDCD6/PSMD10/DCUN1D5/UBB/DERL1/RIPK2/RBX1/UBE2N/FKBP1A/GNL3/UBE2C/MAPK9/STUB1/PELI1/NDFIP2/UBQLN1/BMI1/NDFIP1/PTTG1IP/PAXIP1/SAE1/UBA2/TBC1D7/ARRDC4/TSPYL5/VCP/HDAC3/FANCI/RWDD3/PINK1
GOBP_NUCLEOTIDE_EXCISION_REPAIR_DNA_DUPLEX_UNWINDING	GOBP_NUCLEOTIDE_EXCISION_REPAIR_DNA_DUPLEX_UNWINDING	22	0.475725	2.3895	0.000112721	0.0019522	0.00155115	11747	tags=91%, list=37%, signal=57%	UBB/GTF2H5/RBX1/RAD23B/CETN2/GTF2H3/RPS27A/CHD1L/CUL4A/CUL4B/UBC/ERCC3/GTF2H2/GTF2H1/PARP1/UBA52/GTF2H4/DDB2/XPA/DDB1
GOBP_RIBONUCLEOSIDE_MONOPHOSPHATE_METABOLIC_PROCESS	GOBP_RIBONUCLEOSIDE_MONOPHOSPHATE_METABOLIC_PROCESS	52	0.334111	2.1117	0.000113407	0.00195879	0.00155639	3664	tags=35%, list=12%, signal=31%	GMPS/PRPS1/CMPK1/HPRT1/UPRT/PPAT/APRT/ADSL/AK2/UCK2/PRPS2/GART/GMPR2/GUK1/NUDT2/PAICS/IMPDH2/CASK
GOBP_MATURATION_OF_SSU_RRNA	GOBP_MATURATION_OF_SSU_RRNA	41	0.383252	2.24394	0.000113937	0.00196266	0.00155946	3630	tags=41%, list=12%, signal=37%	RPS21/RPP40/GTF2H5/HEATR1/RIOK2/RRS1/RCL1/MRPS11/RPS8/BYSL/RPS14/RPS28/TSR2/RIOK3/UTP6/NOL11/NGDN
GOBP_POSITIVE_REGULATION_OF_EPITHELIAL_TO_MESENCHYMAL_TRANSITION	GOBP_POSITIVE_REGULATION_OF_EPITHELIAL_TO_MESENCHYMAL_TRANSITION	49	-0.473664	-1.97539	0.000120265	0.00206299	0.00163918	2106	tags=29%, list=7%, signal=27%	TCF7L2/BCL9L/MIR21/BMP7/GLIPR2/PDPN/SMAD3/ISL1/NOTCH1/FOXC1/FERMT2/TGFB1I1/TGFB3/IL6
GOBP_REGULATION_OF_INTRINSIC_APOPTOTIC_SIGNALING_PATHWAY_BY_P53_CLASS_MEDIATOR	GOBP_REGULATION_OF_INTRINSIC_APOPTOTIC_SIGNALING_PATHWAY_BY_P53_CLASS_MEDIATOR	25	0.443595	2.34333	0.000120406	0.00206299	0.00163918	3677	tags=52%, list=12%, signal=46%	RPS7/RPL26/ARMC10/UBB/MIF/HNRNPK/TAF9/BCL2L12/PTTG1IP/SIRT1/TRIAP1/ELL3/ING2
GOBP_PROTEIN_DEGLYCOSYLATION	GOBP_PROTEIN_DEGLYCOSYLATION	23	0.463207	2.34963	0.000124103	0.00212067	0.00168501	3471	tags=43%, list=11%, signal=39%	EDEM1/SEL1L/RNF103/NGLY1/PARK7/EDEM2/DERL2/OS9/AGA/AMFR
GOBP_NEGATIVE_REGULATION_OF_MUSCLE_ADAPTATION	GOBP_NEGATIVE_REGULATION_OF_MUSCLE_ADAPTATION	11	-0.734618	-2.07632	0.000125077	0.00213164	0.00169373	1643	tags=64%, list=5%, signal=60%	MIR214/IGFBP5/LMNA/FOXO1/ERRFI1/SMAD3/ATP2B4
GOBP_MUSCLE_CELL_PROLIFERATION	GOBP_MUSCLE_CELL_PROLIFERATION	203	-0.320301	-1.61838	0.000126086	0.00214255	0.00170239	5217	tags=28%, list=17%, signal=24%	FOXP1/MIR1298/MIR221/MIR26A1/MIR214/NR4A3/MIR548C/MIR34A/IL6R/MIR638/P2RY6/HTR1B/MAPK11/FOXC2/EDN1/PPARD/ELN/MFN2/FGF2/ZFPM2/FGF9/TCF7L2/MYOCD/TGM2/MIR21/EPHB1/IGFBP5/TPM1/RBP4/PIM1/ELANE/CCL5/TBX2/PAK1/MEIS1/NDRG2/ANGPT1/JUN/EFEMP2/FOXJ2/ADIPOQ/HBEGF/NOTCH1/FOXC1/GSTP1/PPARGC1A/IL10/IL18/ADAMTS1/CFLAR/CX3CL1/TGFB3/SERPINF2/IL6/TGFBR3/RBPMS2/CNN1
GOBP_GOLGI_ORGANIZATION	GOBP_GOLGI_ORGANIZATION	118	0.225871	1.96342	0.00012665	0.00214255	0.00170239	2676	tags=25%, list=9%, signal=23%	TMED10/TMED5/GOLPH3/TMED2/TMED7/MAP2K1/RAB2A/CLASP2/TMED9/USO1/SURF4/GOLGA5/YWHAZ/GOLPH3L/ARL1/SEC23IP/PDCD10/PI4K2B/PRMT5/ATL2/ATL3/TMED3/VAMP4/LMAN1/GORASP2/COG3/UBXN2B/CDC42/TMED4/ARFGEF1
GOBP_REGULATION_OF_EPITHELIAL_CELL_DIFFERENTIATION	GOBP_REGULATION_OF_EPITHELIAL_CELL_DIFFERENTIATION	145	-0.346157	-1.69966	0.00012672	0.00214255	0.00170239	2628	tags=25%, list=8%, signal=23%	SMO/MIR18B/S1PR3/SPRY2/TBX3/CEBPB/FGF2/NOTCH4/TNFRSF1A/NUMA1/VEGFA/IKBKB/MIR21/SPRY1/GATA3/SOX9/VCL/DLL1/FOXJ2/OSR1/CAV1/ERRFI1/NOTCH1/ID1/MAFF/SFN/FOXC1/ZFP36/SERPINE1/APOLD1/CLDN5/AHI1/CEACAM1/TP63/ATOH8/PROM1
GOBP_MULTI_MULTICELLULAR_ORGANISM_PROCESS	GOBP_MULTI_MULTICELLULAR_ORGANISM_PROCESS	194	-0.32684	-1.64131	0.000128487	0.00216669	0.00172158	2319	tags=18%, list=7%, signal=17%	RGS2/ACVR1C/PAPPA/OXT/VEGFA/APOL2/MIR21/IGFBP5/HSD11B2/RAMP2/BCL2/P2RX1/GNRH1/PCSK5/TEAD3/ITGB4/PTN/ITGA3/CD38/SYDE1/FOSL1/STC1/TRO/MAFF/TGFB3/SEMG1/COL16A1/JUNB/FOS/LEP/STOX2/ITGA5/SCGB1A1/PLA2G4B/FOSB
GOCC_CLATHRIN_COATED_ENDOCYTIC_VESICLE_MEMBRANE	GOCC_CLATHRIN_COATED_ENDOCYTIC_VESICLE_MEMBRANE	39	0.360715	2.13884	0.000128985	0.00216938	0.00172372	2307	tags=33%, list=7%, signal=31%	HLA-DRB1/HLA-DRB5/HLA-DQA1/WNT5A/APOE/CD9/HLA-DRA/FZD4/AP2S1/CLTC/HLA-DPA1/HLA-DRB4/HLA-DRB3
GOMF_INTERMEDIATE_FILAMENT_BINDING	GOMF_INTERMEDIATE_FILAMENT_BINDING	14	-0.675352	-2.05897	0.000134235	0.00225177	0.00178918	1724	tags=36%, list=5%, signal=34%	PKP1/EVPL/SYNM/NES/KRT14
GOBP_HEART_MORPHOGENESIS	GOBP_HEART_MORPHOGENESIS	228	-0.314117	-1.59951	0.000137445	0.0022996	0.00182719	3933	tags=23%, list=13%, signal=20%	SOX17/NOTO/SMO/SNAI2/MYBPC3/FOXC2/PPP1R13L/SMARCD3/ANKRD1/FLRT2/CCDC40/TBX3/POU4F1/ELN/GATA5/ZFPM2/FHL2/DLC1/DKK1/VEGFA/SLIT3/TBX19/MIR21/TPM1/BMP7/RBP4/SPRY1/PIM1/TBX2/GATA3/SOX9/VANGL2/RNF207/SRF/DLL1/WNT3A/COL5A1/ALDH1A2/SLIT2/SMAD3/ISL1/NOTCH1/ACTC1/NPHP3/FOXC1/ADAMTS1/EPHB4/FOXF1/DCHS1/CLDN5/AHI1/TGFBR3/FLNA
GOBP_CELLULAR_RESPONSE_TO_COPPER_ION	GOBP_CELLULAR_RESPONSE_TO_COPPER_ION	25	0.439877	2.3237	0.000138472	0.00231076	0.00183605	12396	tags=92%, list=39%, signal=56%	BECN1/ATP7A/SNCA/MT1B/MT1M/MT1H/APP/MT1F/MT1G/CYP1A1/NFE2L2/BACE1/PRNP/AQP1/MT1X/CYP1A2/MT1A/HSF1/MT2A/DAXX/MT1E/MAP1LC3A/MT3
GOMF_MANNOSYLTRANSFERASE_ACTIVITY	GOMF_MANNOSYLTRANSFERASE_ACTIVITY	24	0.456863	2.35247	0.000139766	0.00232404	0.0018466	2768	tags=42%, list=9%, signal=38%	PIGB/ALG1/DPM1/DPY19L3/PIGM/TMTC2/TMTC4/DPY19L4/ALG8/ALG9
GOMF_THIOLESTER_HYDROLASE_ACTIVITY	GOMF_THIOLESTER_HYDROLASE_ACTIVITY	34	0.391727	2.2303	0.000139994	0.00232404	0.0018466	3940	tags=47%, list=13%, signal=41%	LYPLA1/LYPLAL1/ACOT8/ABHD12/FASN/ESD/HAGH/ACOT1/HIBCH/ACOT4/LYPLA2/PPT1/ACOT2/ABHD10/PNKD/ACOT9
GOBP_NEGATIVE_REGULATION_OF_LOCOMOTION	GOBP_NEGATIVE_REGULATION_OF_LOCOMOTION	338	-0.287184	-1.51527	0.000141705	0.00234637	0.00186435	5538	tags=27%, list=18%, signal=22%	SP100/JAG1/MIR494/PTPRU/MIR320A/MIR1298/MECP2/MIR221/MIR26A1/SEMA7A/CXCL13/MIR214/DUSP3/MIR93/SFRP1/ADARB1/SEMA5B/MIR34A/KLRK1/MIR638/NF1/CCL2/MIR30C2/CORO1C/CARD10/PPARD/SEMA3A/SRGAP1/FGF2/PADI2/ACVR1C/LRP1/DLC1/RRAS/TNN/SPOCK3/MYOCD/ADORA2A/MIR21/KRT16/DLG5/IGFBP5/TPM1/C5/PIP5KL1/EVL/ELANE/BCL2/ARHGAP4/GNRH1/GATA3/STARD13/SEMA4C/IFITM1/NRG3/VCL/FBLN1/CLASP1/SRF/SEMA6A/WNT3A/DUSP1/PTN/ADIPOQ/RHO…
GOBP_MORPHOGENESIS_OF_A_BRANCHING_STRUCTURE	GOBP_MORPHOGENESIS_OF_A_BRANCHING_STRUCTURE	186	-0.326861	-1.63688	0.000142131	0.00234736	0.00186513	3809	tags=24%, list=12%, signal=21%	RSPO2/SMO/LAMA5/WNT2B/CELSR1/FOXC2/EDN1/SPRY2/SIX2/PLXNA1/BCL11A/SEMA3A/TBX3/FGF2/NOTCH4/EPHA2/HOXD13/VEGFA/TGM2/NFATC4/DLG5/BMP7/SPRY1/SOCS3/BCL2/RSPO3/PAK1/SOX9/TNC/NTN4/RASIP1/SRF/GLI3/COL13A1/SLIT2/NOTCH1/EDNRA/SEMA3E/IL10/FOXF1/DCHS1/PKD1/HOXD11/LRP5L/TP63
GOBP_MEMORY	GOBP_MEMORY	100	-0.379635	-1.7797	0.000151534	0.00249623	0.00198342	3585	tags=36%, list=11%, signal=32%	SCN2A/KAT2A/ARC/SLC6A1/LRRN4/MECP2/SLC2A4/RASGRF1/MUSK/CRTC1/SORCS3/NTF3/NTF4/GRIN2A/SYT11/PPP3CB/ABCA7/CEBPB/HTR2A/OXT/NFATC4/CREB1/NPAS4/SRF/ITPR3/PTN/ITGA3/CIC/PTCHD1/SERPINF1/SGK1/MAP1A/SHANK3/EIF2AK4/ITGA5/CCK
GOBP_LIPOPROTEIN_CATABOLIC_PROCESS	GOBP_LIPOPROTEIN_CATABOLIC_PROCESS	12	0.620544	2.40688	0.000154197	0.00253358	0.00201309	3717	tags=67%, list=12%, signal=59%	LYPLA1/LYPLAL1/APOE/ABHD12/CTSD/LYPLA2/PPT1/ABHD10
GOBP_REGULATION_OF_OXIDATIVE_STRESS_INDUCED_INTRINSIC_APOPTOTIC_SIGNALING_PATHWAY	GOBP_REGULATION_OF_OXIDATIVE_STRESS_INDUCED_INTRINSIC_APOPTOTIC_SIGNALING_PATHWAY	27	0.420527	2.26183	0.000159096	0.00260738	0.00207174	3488	tags=48%, list=11%, signal=43%	PPIA/NME5/HTRA2/TRAP1/PARK7/UBQLN1/SOD1/HIF1A/NONO/SIRT1/PINK1/SFPQ/P4HB
GOBP_VIRAL_BUDDING_VIA_HOST_ESCRT_COMPLEX	GOBP_VIRAL_BUDDING_VIA_HOST_ESCRT_COMPLEX	20	0.485436	2.32005	0.000160193	0.00261866	0.0020807	12638	tags=95%, list=40%, signal=57%	CHMP2B/CHMP4C/CHMP3/TSG101/CHMP1B/VPS4B/CHMP2A/VPS28/VPS37C/CHMP4B/VPS37A/SNF8/CHMP7/CHMP6/VPS4A/PDCD6IP/VPS37B/VPS37D/CHMP4A
GOMF_MISFOLDED_PROTEIN_BINDING	GOMF_MISFOLDED_PROTEIN_BINDING	28	0.43546	2.32801	0.000164145	0.00266454	0.00211715	3037	tags=43%, list=10%, signal=39%	EDEM1/HSPA8/DERL1/F12/DNAJB9/STUB1/HSPA14/DNAJC10/SDF2/HSPA9/DERL2/TOR1A
GOBP_STRIATED_MUSCLE_CELL_DIFFERENTIATION	GOBP_STRIATED_MUSCLE_CELL_DIFFERENTIATION	247	-0.30841	-1.58426	0.000164377	0.00266454	0.00211715	3354	tags=21%, list=11%, signal=19%	MYOZ2/EDN1/RGS4/TBX18/ANKRD1/FER1L5/LRRC10/TBX3/RGS2/FHL2/P2RX2/SLC9A1/DKK1/VEGFA/MYOCD/KLF5/IGFBP5/TPM1/RBM38/BCL2/PAK1/AKAP13/WFIKKN1/OBSCN/KDM6B/SRF/DLL1/IL4R/WNT3A/MYH3/MYOF/FHOD3/ISL1/NOTCH1/CSRP1/ACTC1/BIN3/CFLAR/HNRNPU/SIK1/ACTA1/CACNA1H/PGM5/POPDC2/EHD2/PI16/LMOD1/LMOD3/MYH11/SCGB3A1/FLNC
GOBP_BASEMENT_MEMBRANE_ASSEMBLY	GOBP_BASEMENT_MEMBRANE_ASSEMBLY	15	-0.668437	-2.0963	0.000164402	0.00266454	0.00211715	1529	tags=40%, list=5%, signal=38%	RAMP2/NTN4/CLASP1/LAMB3/PHLDB1/LAMB2
GOBP_CHROMOSOME_LOCALIZATION	GOBP_CHROMOSOME_LOCALIZATION	68	0.276329	1.88154	0.000164779	0.00266454	0.00211715	2838	tags=32%, list=9%, signal=29%	CHMP5/CHMP2B/CHMP4C/CDCA5/CHMP1B/BECN1/SEH1L/RRS1/FAM83D/AURKB/VPS4B/DLGAP5/ACTR2/ACTR3/KIFC1/MLH1/KPNB1/CDT1/CHMP2A/KIF22/KATNB1/NUP62
GOBP_STRIATED_MUSCLE_CELL_DEVELOPMENT	GOBP_STRIATED_MUSCLE_CELL_DEVELOPMENT	97	-0.388714	-1.81775	0.000165078	0.00266454	0.00211715	8148	tags=40%, list=26%, signal=30%	NRAP/MYPN/MYF6/MYF5/CFL2/MIR1-1/PDGFRA/MYH6/CAPN3/TMOD1/DMD/MYOD1/KEL/OBSL1/SMO/KRT19/MYOZ2/EDN1/ANKRD1/P2RX2/VEGFA/TPM1/BCL2/AKAP13/WFIKKN1/OBSCN/SRF/MYH3/FHOD3/CSRP1/ACTC1/BIN3/CFLAR/ACTA1/PGM5/LMOD1/LMOD3/MYH11/FLNC
GOBP_CARDIAC_MUSCLE_TISSUE_DEVELOPMENT	GOBP_CARDIAC_MUSCLE_TISSUE_DEVELOPMENT	198	-0.320346	-1.61331	0.000167145	0.00269113	0.00213828	3502	tags=24%, list=11%, signal=21%	MAPK11/MYBPC3/FOXC2/EDN1/RGS4/PPP1R13L/TBX18/JPH2/ANKRD1/LRRC10/TBX3/POU4F1/FGF2/GATA5/ZFPM2/RGS2/FHL2/SLC9A1/DKK1/VEGFA/MYOCD/GJC1/CREB1/TPM1/BMP7/RBP4/PIM1/TBX2/PAK1/AKAP13/MEIS1/KDM6B/SRF/DLL1/WNT3A/ALDH1A2/FHOD3/ISL1/NOTCH1/ACTC1/FOXC1/HNRNPU/SIK1/ADAMTS9/PI16/TGFBR3/MYH11
GOBP_REGULATION_OF_ANOIKIS	GOBP_REGULATION_OF_ANOIKIS	23	-0.585267	-2.07445	0.000167782	0.00269461	0.00214104	1604	tags=30%, list=5%, signal=29%	CEACAM6/BCL2/CAV1/NOTCH1/SIK1/ITGA5/PDK4
GOBP_RNA_POLYMERASE_II_PREINITIATION_COMPLEX_ASSEMBLY	GOBP_RNA_POLYMERASE_II_PREINITIATION_COMPLEX_ASSEMBLY	24	0.451589	2.32531	0.000171365	0.00274526	0.00218129	2475	tags=38%, list=8%, signal=35%	PSMC4/DR1/GTF2A2/TAF7/CAND1/GTF2B/PSMC2/PSMC6/TAF12
GOBP_POSITIVE_REGULATION_OF_TELOMERE_MAINTENANCE_VIA_TELOMERE_LENGTHENING	GOBP_POSITIVE_REGULATION_OF_TELOMERE_MAINTENANCE_VIA_TELOMERE_LENGTHENING	36	0.371249	2.06425	0.000172689	0.00275958	0.00219267	2939	tags=42%, list=9%, signal=38%	CCT2/CCT8/TCP1/CCT7/XRCC5/CCT6A/DHX36/AURKB/HNRNPA1/CCT5/MAPKAPK5/DKC1/CCT3/CCT4/PNKP
GOBP_TRANSCRIPTION_ELONGATION_FROM_RNA_POLYMERASE_II_PROMOTER	GOBP_TRANSCRIPTION_ELONGATION_FROM_RNA_POLYMERASE_II_PROMOTER	75	0.25995	1.83529	0.000183565	0.00292274	0.00232231	3696	tags=35%, list=12%, signal=31%	EAPP/ENY2/GTF2H5/WDR61/POLR2B/POLR2D/POLR2H/ELL2/LEO1/POLR2F/SUPT4H1/MNAT1/POLR2L/EAF1/CCNH/AFF4/GTF2H3/POLR2I/ELP4/POLR2G/TCEA1/NCBP2/ELL3/POLR2K/ELOF1/ADRM1
GOBP_HEMIDESMOSOME_ASSEMBLY	GOBP_HEMIDESMOSOME_ASSEMBLY	11	-0.720873	-2.03747	0.000183979	0.00292274	0.00232231	1014	tags=55%, list=3%, signal=53%	DST/ITGB4/LAMB3/COL17A1/KRT14/KRT5
GOCC_COSTAMERE	GOCC_COSTAMERE	17	-0.648799	-2.10317	0.000184268	0.00292274	0.00232231	1229	tags=35%, list=4%, signal=34%	SVIL/VCL/SYNM/PGM5/AHNAK2/FLNC
GOBP_POSITIVE_REGULATION_OF_VIRAL_PROCESS	GOBP_POSITIVE_REGULATION_OF_VIRAL_PROCESS	85	0.260596	1.88694	0.000190293	0.00301086	0.00239233	3488	tags=29%, list=11%, signal=26%	HLA-DRB1/TOP2A/CHMP2B/CHMP4C/PPIA/CHMP3/TSG101/POLR2B/PPIH/POLR2D/POLR2H/CNOT7/VPS4B/TMEM39A/POLR2F/SUPT4H1/POLR2L/PDE12/CHMP2A/POLR2I/POLR2G/PPIE/TOP2B/POLR2K/P4HB
GOBP_CYTOSKELETON_DEPENDENT_CYTOKINESIS	GOBP_CYTOSKELETON_DEPENDENT_CYTOKINESIS	81	0.256612	1.87377	0.000190851	0.00301225	0.00239343	3073	tags=27%, list=10%, signal=25%	CHMP5/ECT2/CHMP2B/NUSAP1/CHMP4C/CHMP3/CHMP1B/MITD1/JTB/RACGAP1/CEP55/AURKB/VPS4B/ACTR2/ACTR3/CENPA/KIF20A/KIF4A/CHMP2A/NUP62/ARF1/RHOA
GOBP_POLYAMINE_METABOLIC_PROCESS	GOBP_POLYAMINE_METABOLIC_PROCESS	15	0.56497	2.39271	0.000211143	0.00332434	0.00264141	4190	tags=60%, list=13%, signal=52%	SMS/AZIN1/SAT1/SRM/DHPS/OAZ1/OAZ3/ODC1/OAZ2
GOBP_IRON_SULFUR_CLUSTER_ASSEMBLY	GOBP_IRON_SULFUR_CLUSTER_ASSEMBLY	20	0.478098	2.28498	0.000218248	0.00342778	0.0027236	2427	tags=40%, list=8%, signal=37%	GLRX3/ISCA1/CIAPIN1/GLRX5/NFU1/NUBP2/BOLA2/HSPA9
GOBP_GLYCOSYL_COMPOUND_BIOSYNTHETIC_PROCESS	GOBP_GLYCOSYL_COMPOUND_BIOSYNTHETIC_PROCESS	37	0.366041	2.02251	0.000219114	0.00343297	0.00272772	3843	tags=35%, list=12%, signal=31%	TK1/GMPS/HPRT1/APRT/NME5/NME7/LCMT2/UCK2/NME1/DCK/TYW1/IMPDH2/NME3
GOBP_REGULATION_OF_MUSCLE_SYSTEM_PROCESS	GOBP_REGULATION_OF_MUSCLE_SYSTEM_PROCESS	219	-0.311306	-1.58022	0.000223773	0.00349192	0.00277456	3458	tags=21%, list=11%, signal=19%	PLCE1/MYBPC3/EDN1/RGS4/CALCA/PDE9A/GATA5/RGS2/CAMK2B/TNFRSF1A/LMCD1/OXT/ATP1A2/SLC9A1/KCNB2/MYOCD/EDN2/MIR21/IGFBP5/TPM1/CACNA1C/P2RX1/ZC3H12A/PAK1/LMNA/RNF207/BIN1/SGCA/KCNMA1/SRF/DAPK3/CAV1/FOXO1/ERRFI1/SMAD3/STC1/NOTCH1/ATP2B4/PPARGC1A/CHGA/PRKCA/MYL9/PI16/GSTM2/CNN1/HSPB6/SSTR2
GOBP_PLATELET_DEGRANULATION	GOBP_PLATELET_DEGRANULATION	121	-0.368479	-1.77044	0.000223967	0.00349192	0.00277456	1966	tags=21%, list=6%, signal=19%	VEGFA/A2M/ITIH4/SERPING1/PCDH7/P2RX1/TUBA4A/VCL/ORM1/ECM1/CLEC3B/MMRN1/RARRES2/LGALS3BP/ACTN4/CFD/TLN1/ACTN1/SERPINE1/SYTL4/TGFB3/SERPINF2/TF/ORM2/FLNA
GOBP_SHORT_CHAIN_FATTY_ACID_METABOLIC_PROCESS	GOBP_SHORT_CHAIN_FATTY_ACID_METABOLIC_PROCESS	16	0.532626	2.35758	0.000225102	0.0035011	0.00278185	929	tags=25%, list=3%, signal=24%	ACSM1/MCEE/PCCB/OXSM
GOBP_ARP2_3_COMPLEX_MEDIATED_ACTIN_NUCLEATION	GOBP_ARP2_3_COMPLEX_MEDIATED_ACTIN_NUCLEATION	33	0.37306	2.12349	0.000226041	0.00350719	0.00278669	3762	tags=45%, list=12%, signal=40%	ARPC3/TRIM27/NCKAP1/ARPC1B/CORO1B/IQGAP2/ACTR2/ACTR3/ARPC5/GMFB/ARF1/ARPC1A/ARPC4/CYFIP1/WASL
GOBP_REGULATION_OF_CELL_MATRIX_ADHESION	GOBP_REGULATION_OF_CELL_MATRIX_ADHESION	116	-0.367716	-1.75962	0.000228099	0.00353058	0.00280528	7876	tags=38%, list=25%, signal=29%	MYF5/PLEKHA2/DISC1/CD3E/ARHGAP6/MIR939/PTK2B/SDC4/MIR192/AJAP1/ACVRL1/JAG1/CCR7/MACF1/DUSP3/GPM6B/SFRP1/EPB41L5/NF1/S100A10/CORO1C/EPHA3/FERMT1/LRP1/DLC1/RRAS/SLC9A1/VEGFA/PPM1F/CEACAM6/BCL2/VCL/CLASP1/EFEMP2/DAPK3/SMAD3/SEMA3E/BCL6/FERMT2/SERPINE1/CCL21/CX3CL1/COL16A1/FAM107A
GOBP_IMP_METABOLIC_PROCESS	GOBP_IMP_METABOLIC_PROCESS	12	0.609153	2.3627	0.000236637	0.00365198	0.00290174	12276	tags=100%, list=39%, signal=61%	HPRT1/PPAT/ADSL/GART/PAICS/ATIC/PFAS/AMPD1/NT5C/AMPD2/NT5C2/AMPD3
GOMF_PURINE_NUCLEOTIDE_TRANSMEMBRANE_TRANSPORTER_ACTIVITY	GOMF_PURINE_NUCLEOTIDE_TRANSMEMBRANE_TRANSPORTER_ACTIVITY	19	0.496824	2.35237	0.000237082	0.00365198	0.00290174	2395	tags=42%, list=8%, signal=39%	ABCC4/SLC33A1/SLC25A5/SLC35B2/SLC35B3/SLC25A17/SLC25A4/ABCC11
GOMF_ENDORIBONUCLEASE_ACTIVITY_PRODUCING_5_PHOSPHOMONOESTERS	GOMF_ENDORIBONUCLEASE_ACTIVITY_PRODUCING_5_PHOSPHOMONOESTERS	23	0.448319	2.27411	0.000239769	0.00368451	0.00292759	3069	tags=35%, list=10%, signal=31%	APEX1/POP7/RPP40/RNASEH2A/POP4/FEN1/RPP21/DBR1
GOMF_RIBONUCLEASE_ACTIVITY	GOMF_RIBONUCLEASE_ACTIVITY	98	0.23055	1.7992	0.000240619	0.00368872	0.00293093	3146	tags=27%, list=10%, signal=24%	LACTB2/EXOSC5/APEX1/POP7/RPP40/EXOSC4/RNASEH2A/EXOSC3/CNOT7/TSNAX/POP4/RCL1/CNOT8/REXO2/EXD2/CNOT6/FEN1/EXOSC9/CPSF3/PDE12/RPP21/RNASEK/RNASE6/XRN2/DBR1/TSEN34
GOBP_RESPONSE_TO_CAMP	GOBP_RESPONSE_TO_CAMP	91	-0.384814	-1.77783	0.000249531	0.00381622	0.00303224	2216	tags=21%, list=7%, signal=19%	OXT/CARM1/IGFBP5/PER1/ALDH3A1/DUOX1/CFTR/JUN/DUSP1/AHR/ADIPOQ/EEF2K/FOSL1/STC1/PNPT1/RAPGEF3/FOS/PENK/FOSB
GOBP_SMALL_NUCLEOLAR_RIBONUCLEOPROTEIN_COMPLEX_ASSEMBLY	GOBP_SMALL_NUCLEOLAR_RIBONUCLEOPROTEIN_COMPLEX_ASSEMBLY	10	0.696235	2.52133	0.000250719	0.00382526	0.00303942	4392	tags=80%, list=14%, signal=69%	ZNHIT3/RUVBL1/SHQ1/RUVBL2/TAF9/PIH1D1/NAF1/ZNHIT6
GOCC_MYOFILAMENT	GOCC_MYOFILAMENT	25	-0.559149	-2.00977	0.000255132	0.00388334	0.00308557	1631	tags=28%, list=5%, signal=27%	TPM1/TPM2/FHOD3/ACTA1/MYOM1/LMOD1/LMOD3
GOBP_PURINE_NUCLEOSIDE_MONOPHOSPHATE_METABOLIC_PROCESS	GOBP_PURINE_NUCLEOSIDE_MONOPHOSPHATE_METABOLIC_PROCESS	39	0.350025	2.07546	0.000259244	0.00393657	0.00312787	12276	tags=85%, list=39%, signal=52%	GMPS/HPRT1/PPAT/APRT/ADSL/AK2/DCK/PRPS2/GART/GMPR2/GUK1/NUDT2/PAICS/IMPDH2/CASK/ADK/MPP1/ATIC/PFAS/DGUOK/IMPDH1/TJP2/AMPD1/NT5C/ADA/DLG2/AMPD2/XDH/MAGI3/NT5E/NT5C2/AK3/AMPD3
GOCC_PHAGOCYTIC_VESICLE	GOCC_PHAGOCYTIC_VESICLE	130	0.213996	1.81882	0.000262519	0.00397688	0.00315989	3278	tags=25%, list=10%, signal=23%	RAB9A/RAB5A/ANXA3/VAMP7/LAMP2/STXBP3/ATP6V0B/ITGAV/PIK3R4/BECN1/SNAP23/TLR7/B2M/RAB20/ATP7A/RAB10/ATP6V0E2/ATP6V0E1/RAB32/ABCA1/ATP6V0D1/SEC22B/STX8/CDC42/CLCN3/OCRL/RAB22A/VIM/STX6/APPL2/RAB11A/CTSS/CD36
GOBP_PYRIMIDINE_NUCLEOTIDE_METABOLIC_PROCESS	GOBP_PYRIMIDINE_NUCLEOTIDE_METABOLIC_PROCESS	47	0.32687	1.94179	0.000266827	0.00401754	0.0031922	3019	tags=32%, list=10%, signal=29%	PRPS1/CMPK1/UPRT/DCTPP1/TBPL1/DCTD/NME5/ENPP3/TYMS/NME7/DUT/UCK2/NME1/DCK/SMUG1
GOMF_CYCLIN_DEPENDENT_PROTEIN_SERINE_THREONINE_KINASE_REGULATOR_ACTIVITY	GOMF_CYCLIN_DEPENDENT_PROTEIN_SERINE_THREONINE_KINASE_REGULATOR_ACTIVITY	47	0.32696	1.94232	0.000266827	0.00401754	0.0031922	2636	tags=26%, list=8%, signal=23%	CCNO/CKS1B/CCNG2/CCNB2/CCNC/CKS2/CDK4/CCNG1/MNAT1/CCNH/CCNA2/CDKN1B
GOBP_REGULATION_OF_INTEGRIN_MEDIATED_SIGNALING_PATHWAY	GOBP_REGULATION_OF_INTEGRIN_MEDIATED_SIGNALING_PATHWAY	14	-0.661231	-2.01592	0.000267083	0.00401754	0.0031922	219	tags=21%, list=1%, signal=21%	LIMS2/CD177/FLNA
GOMF_NUCLEOTIDE_TRANSMEMBRANE_TRANSPORTER_ACTIVITY	GOMF_NUCLEOTIDE_TRANSMEMBRANE_TRANSPORTER_ACTIVITY	23	0.444763	2.25607	0.000268805	0.00402459	0.0031978	3771	tags=48%, list=12%, signal=42%	ABCC4/SLC33A1/SLC25A5/SLC35B2/SLC35B3/SLC25A17/SLC25A4/ABCC11/SLC19A1/SLC25A36/SLC25A6
GOBP_MICROTUBULE_CYTOSKELETON_ORGANIZATION_INVOLVED_IN_MITOSIS	GOBP_MICROTUBULE_CYTOSKELETON_ORGANIZATION_INVOLVED_IN_MITOSIS	124	0.210458	1.78832	0.000268808	0.00402459	0.0031978	3185	tags=28%, list=10%, signal=25%	CDC20/RAN/CHMP5/CHMP2B/NUSAP1/AURKA/PRC1/CHMP4C/CLASP2/CHMP1B/DYNLT1/RACGAP1/CLTC/AURKB/VPS4B/STIL/DRG1/DLGAP5/CENPA/KIFC1/TACC3/TBCE/UBXN2B/KPNB1/KIF4A/SBDS/CHMP2A/KIF3B/NUP62/BCCIP/MAD2L1/KIF11/RHOA/RAB11A/VCP
GOBP_CELL_CYCLE_DNA_REPLICATION	GOBP_CELL_CYCLE_DNA_REPLICATION	58	0.298278	1.90256	0.000279547	0.00417561	0.0033178	3393	tags=34%, list=11%, signal=31%	RPA3/ZMPSTE24/GMNN/RFC4/POLE4/PCNA/PRIM2/POLE3/MCM4/GINS3/MCM2/FEN1/PRIM1/TIPIN/CDT1/RPA1/POLD2/RPA2/MCM5/RFC3
GOBP_STRESS_FIBER_ASSEMBLY	GOBP_STRESS_FIBER_ASSEMBLY	99	-0.370031	-1.72943	0.000296171	0.00440526	0.00350027	3973	tags=29%, list=13%, signal=26%	APOA1/FHDC1/BAG4/LIMK1/S100A10/ELN/ARAP1/CORO2B/SORBS3/DLC1/SLC9A1/ARHGEF10/CGNL1/PPM1F/MIR21/TPM1/EVL/PAK1/ASAP3/SORBS1/LPAR1/CLASP1/SRF/ZYX/SMAD3/FERMT2/RAPGEF3/TGFB3/SERPINF2
GOBP_RESPONSE_TO_PURINE_CONTAINING_COMPOUND	GOBP_RESPONSE_TO_PURINE_CONTAINING_COMPOUND	141	-0.340968	-1.66544	0.00029659	0.00440526	0.00350027	2216	tags=20%, list=7%, signal=19%	PDE2A/P2RX6/OXT/CARM1/P2RX2/ADORA2A/IGFBP5/P2RY11/PER1/P2RX1/ALDH3A1/DUOX1/CFTR/JUN/DUSP1/AHR/ADIPOQ/EEF2K/FOSL1/STC1/PPARGC1A/PNPT1/RAPGEF3/CIB2/FOS/PENK/GSTM2/FOSB
GOBP_POSITIVE_REGULATION_OF_TELOMERE_MAINTENANCE	GOBP_POSITIVE_REGULATION_OF_TELOMERE_MAINTENANCE	46	0.3258	1.90132	0.000297992	0.00440526	0.00350027	3243	tags=39%, list=10%, signal=35%	CCT2/CCT8/TCP1/CCT7/XRCC5/CCT6A/GNL3/DHX36/AURKB/HNRNPA1/CCT5/MAPKAPK5/DKC1/CCT3/CCT4/PNKP/NBN/ERCC1
GOBP_PERIPHERAL_NERVOUS_SYSTEM_DEVELOPMENT	GOBP_PERIPHERAL_NERVOUS_SYSTEM_DEVELOPMENT	68	-0.415017	-1.8182	0.000298216	0.00440526	0.00350027	4900	tags=32%, list=16%, signal=27%	NAB1/HAPLN2/NEUROG3/NF1/NTF3/NTF4/POU4F1/MED12/HOXD9/LGI4/PLXNA4/ARHGEF10/GFRA3/SLC5A3/ITGB4/GPC1/ISL1/CNTNAP1/HOXD10/GSTM3/LAMB2/NEFH
GOBP_TRNA_5_END_PROCESSING	GOBP_TRNA_5_END_PROCESSING	13	0.605441	2.39713	0.000298359	0.00440526	0.00350027	2734	tags=46%, list=9%, signal=42%	POP7/RPP40/HSD17B10/POP4/THG1L/RPP21
GOBP_VACUOLAR_ACIDIFICATION	GOBP_VACUOLAR_ACIDIFICATION	23	0.439813	2.23096	0.000302707	0.00445919	0.00354312	3694	tags=48%, list=12%, signal=42%	SNAPIN/ATP6V0E2/GRN/ATP6V0E1/ATP6AP2/TMEM9/ATP6V0D1/DMXL1/CCDC115/PPT1/TMEM199
GOBP_TONIC_SMOOTH_MUSCLE_CONTRACTION	GOBP_TONIC_SMOOTH_MUSCLE_CONTRACTION	10	-0.726051	-2.00053	0.000303909	0.00446662	0.00354903	5006	tags=70%, list=16%, signal=59%	SCNN1B/EDN1/HTR2A/EDN2/CD38/MYLK/EDNRA
GOBP_NEGATIVE_REGULATION_OF_CELLULAR_PROTEIN_CATABOLIC_PROCESS	GOBP_NEGATIVE_REGULATION_OF_CELLULAR_PROTEIN_CATABOLIC_PROCESS	68	0.268886	1.83086	0.000306879	0.00449995	0.00357551	2521	tags=22%, list=8%, signal=20%	RPS7/SDCBP/UCHL5/AQP11/PBK/PDCL3/GABARAPL2/SMARCC1/PARK7/EIF3H/CSNK2A1/RPL23/HSP90AB1/MTM1/TAF9
GOBP_RNA_CAPPING	GOBP_RNA_CAPPING	30	0.405141	2.21846	0.000310053	0.00453612	0.00360425	3392	tags=43%, list=11%, signal=39%	GTF2H5/POLR2B/POLR2D/POLR2H/POLR2F/MNAT1/POLR2L/CCNH/GTF2H3/POLR2I/POLR2G/NCBP2/POLR2K
GOBP_CHAPERONE_MEDIATED_PROTEIN_FOLDING	GOBP_CHAPERONE_MEDIATED_PROTEIN_FOLDING	59	0.28934	1.83287	0.000310909	0.00453738	0.00360525	2498	tags=25%, list=8%, signal=23%	HSPE1/PTGES3/CCT2/HSPA8/PDCD5/FKBP1A/PDCL3/HSPA14/TRAP1/SDF2/DNAJC5/CSNK2A1/TOR1B/HSPA9/PEX19
GOBP_RNA_SURVEILLANCE	GOBP_RNA_SURVEILLANCE	14	0.572197	2.40134	0.000311555	0.00453738	0.00360525	9930	tags=93%, list=32%, signal=64%	EXOSC5/EXOSC4/EXOSC3/PELO/EXOSC9/PRPF18/EXOSC7/EXOSC6/PCID2/XRN1/EXOSC2/EXOSC10/EXOSC8
GOBP_NEURON_PROJECTION_GUIDANCE	GOBP_NEURON_PROJECTION_GUIDANCE	271	-0.298756	-1.548	0.000325821	0.00473438	0.00376178	3240	tags=22%, list=10%, signal=20%	SPTBN2/SLIT1/SPTBN1/UNC5B/GAP43/PLXNA1/CNTN2/EPHA3/FLRT2/SEMA3A/UNC5D/NTN5/SPTBN4/EPHA2/MYCBP2/HOXA2/LRP1/PDLIM7/PLXNA4/VEGFA/SLIT3/GFRA3/PIK3CD/EPHB1/BMP7/GFRA2/NGFR/EVL/EFNB1/PALLD/GATA3/SEMA4C/SPTAN1/NTN4/BOC/SEMA6A/DOK4/GLI3/WNT3A/SEMA3F/SEMA3B/NFIB/ENAH/ZSWIM4/SLIT2/GPC1/ISL1/NOTCH1/SEMA3E/NEXN/ROBO3/PLXNB1/SHANK3/FLRT3/EPHB4/RNF165/PRKCA/LAMB2/EPHB6
GOBP_PYRIMIDINE_NUCLEOSIDE_TRIPHOSPHATE_METABOLIC_PROCESS	GOBP_PYRIMIDINE_NUCLEOSIDE_TRIPHOSPHATE_METABOLIC_PROCESS	22	0.452068	2.27067	0.000337546	0.00488473	0.00388124	2318	tags=36%, list=7%, signal=34%	DCTPP1/TBPL1/NME5/TYMS/NME7/DUT/UCK2/NME1
GOCC_SNO_S_RNA_CONTAINING_RIBONUCLEOPROTEIN_COMPLEX	GOCC_SNO_S_RNA_CONTAINING_RIBONUCLEOPROTEIN_COMPLEX	27	0.404062	2.17328	0.000337693	0.00488473	0.00388124	4033	tags=44%, list=13%, signal=39%	NHP2/POP7/RPP40/SNRPF/NOP10/POP4/DKC1/GAR1/RRP9/SNRNP40/NAF1/NOLC1
GOBP_IRE1_MEDIATED_UNFOLDED_PROTEIN_RESPONSE	GOBP_IRE1_MEDIATED_UNFOLDED_PROTEIN_RESPONSE	63	0.267543	1.76713	0.000343824	0.00496222	0.00394281	2054	tags=22%, list=7%, signal=21%	SERP1/PDIA6/XBP1/PDIA5/EDEM1/GFPT1/KDELR3/AGR2/COPS5/SSR1/DNAJB9/YIF1A/SRPRB/HDGF
GOBP_LYMPH_VESSEL_MORPHOGENESIS	GOBP_LYMPH_VESSEL_MORPHOGENESIS	21	-0.574694	-1.98765	0.000350286	0.00504412	0.00400788	3788	tags=43%, list=12%, signal=38%	LGALS12/FOXC2/PPP3CB/EPHA2/VEGFA/PDPN/FOXC1/CCBE1/PKD1
GOBP_THIOESTER_BIOSYNTHETIC_PROCESS	GOBP_THIOESTER_BIOSYNTHETIC_PROCESS	48	0.322771	1.88938	0.00036225	0.00520471	0.00413548	3452	tags=46%, list=11%, signal=41%	ELOVL5/ACSL1/DLD/FASN/ACLY/PPCS/ELOVL2/DLAT/PDHX/ACAT1/ACSL3/PDHB/SLC25A1/HSD17B8/CBR4/HSD17B12/SCD/MLYCD/ELOVL6/PPT1/ELOVL7/ELOVL1
GOBP_REGULATION_OF_ENDOTHELIAL_CELL_DIFFERENTIATION	GOBP_REGULATION_OF_ENDOTHELIAL_CELL_DIFFERENTIATION	44	-0.466521	-1.90321	0.000364823	0.00522994	0.00415553	2320	tags=30%, list=7%, signal=27%	NOTCH4/TNFRSF1A/VEGFA/IKBKB/MIR21/VCL/FOXJ2/NOTCH1/ID1/APOLD1/CLDN5/CEACAM1/ATOH8
GOBP_OSSIFICATION	GOBP_OSSIFICATION	373	-0.275296	-1.46184	0.000366833	0.00524702	0.0041691	5117	tags=24%, list=16%, signal=20%	FGF18/PHOSPHO1/SEMA7A/SOX2/ACHE/NAB1/ISG15/MMP16/GPM6B/SFRP1/ANO6/GDF10/IL6R/FGR/BMP1/RSPO2/GDPD2/SMO/SNAI2/INTU/NF1/FOXC2/AMELX/SIX2/CALCA/INPPL1/CEBPB/JUND/EPHA2/HOXA2/OXT/FHL2/PDLIM7/TNN/TCIRG1/MRC2/TOB2/DKK1/RORB/RRBP1/ZBTB40/NPR2/MIR21/LRP4/IGFBP5/BMP7/BCL2/PTH1R/ZBTB16/SOX9/TP53INP2/TNC/IFITM1/GIT1/GLI3/WNT3A/OSR1/THBS3/PTN/ECM1/FBN2/CLEC3B/COL13A1/FZD9/SBNO2/DDR2/SMAD3/STC1/SNRNP200/NOTCH1…
GOCC_ANAPHASE_PROMOTING_COMPLEX	GOCC_ANAPHASE_PROMOTING_COMPLEX	20	0.464452	2.21976	0.000382471	0.00545851	0.00433715	2253	tags=35%, list=7%, signal=33%	CDC20/ANAPC10/ANAPC13/UBE2C/ANAPC7/MAD2L2/ANAPC5
GOBP_MITOTIC_SPINDLE_ORGANIZATION	GOBP_MITOTIC_SPINDLE_ORGANIZATION	101	0.230628	1.88368	0.000387435	0.00551708	0.00438368	3740	tags=35%, list=12%, signal=31%	CDC20/RAN/CHMP5/CHMP2B/AURKA/PRC1/CHMP4C/CLASP2/CHMP1B/RACGAP1/CLTC/AURKB/VPS4B/STIL/DRG1/DLGAP5/KIFC1/TACC3/TBCE/KPNB1/KIF4A/SBDS/CHMP2A/KIF3B/NUP62/BCCIP/KIF11/RHOA/RAB11A/VCP/DCTN6/TPX2/STAG2/TUBG1/STMN1
GOCC_CYTOPLASMIC_DYNEIN_COMPLEX	GOCC_CYTOPLASMIC_DYNEIN_COMPLEX	18	0.477024	2.21518	0.000395281	0.00561632	0.00446254	1378	tags=28%, list=4%, signal=27%	SNX4/DYNLL1/DYNLT1/DYNC1I2/DYNLRB1
GOMF_UBIQUITIN_LIKE_PROTEIN_CONJUGATING_ENZYME_ACTIVITY	GOMF_UBIQUITIN_LIKE_PROTEIN_CONJUGATING_ENZYME_ACTIVITY	37	0.355449	1.96399	0.000398199	0.00564527	0.00448554	2416	tags=27%, list=8%, signal=25%	UBE2T/UBE2E1/UBE2N/UBE2C/UBE2G1/UBE2E2/UBE2H/UFC1/UBE2F/UBE2D3
GOBP_EPIDERMIS_MORPHOGENESIS	GOBP_EPIDERMIS_MORPHOGENESIS	30	-0.517102	-1.95348	0.000401311	0.00567079	0.00450582	3702	tags=40%, list=12%, signal=35%	SMO/INTU/KRT27/TMEM79/IGFBP5/NGFR/BCL2/NOTCH1/FST/FOXQ1/TP63/KRT17
GOBP_FATTY_ACYL_COA_BIOSYNTHETIC_PROCESS	GOBP_FATTY_ACYL_COA_BIOSYNTHETIC_PROCESS	28	0.419896	2.24481	0.00040177	0.00567079	0.00450582	3452	tags=54%, list=11%, signal=48%	ELOVL5/ACSL1/FASN/ACLY/ELOVL2/ACSL3/SLC25A1/HSD17B8/CBR4/HSD17B12/SCD/ELOVL6/PPT1/ELOVL7/ELOVL1
GOBP_CYCLIC_NUCLEOTIDE_METABOLIC_PROCESS	GOBP_CYCLIC_NUCLEOTIDE_METABOLIC_PROCESS	38	-0.478746	-1.89763	0.000404765	0.00570052	0.00452944	3960	tags=39%, list=13%, signal=35%	NPPA/GUCY1A2/PDE5A/PDE2A/PDE9A/GUCY2F/ADCY5/EPHA2/PDE7A/NPR2/ADCY3/PDE4A/PDE4C/ADCY4/PDE8B
GOBP_GOLGI_VESICLE_BUDDING	GOBP_GOLGI_VESICLE_BUDDING	10	0.672552	2.43557	0.000414213	0.00582078	0.004625	1529	tags=50%, list=5%, signal=48%	TMED10/GOLPH3/TMED2/TMED9/GOLPH3L
GOBP_FATTY_ACYL_COA_METABOLIC_PROCESS	GOBP_FATTY_ACYL_COA_METABOLIC_PROCESS	39	0.342971	2.03363	0.000417041	0.0058477	0.00464638	3452	tags=44%, list=11%, signal=39%	ELOVL5/HSD17B4/ACSL1/FASN/ACLY/ELOVL2/ACSL3/SLC25A1/HSD17B8/CBR4/HSD17B12/DGAT2/SCD/ELOVL6/PPT1/ELOVL7/ELOVL1
GOBP_NEGATIVE_REGULATION_OF_OXIDATIVE_STRESS_INDUCED_INTRINSIC_APOPTOTIC_SIGNALING_PATHWAY	GOBP_NEGATIVE_REGULATION_OF_OXIDATIVE_STRESS_INDUCED_INTRINSIC_APOPTOTIC_SIGNALING_PATHWAY	19	0.480295	2.2741	0.000420448	0.00588259	0.00467411	3424	tags=47%, list=11%, signal=42%	PPIA/NME5/HTRA2/TRAP1/PARK7/HIF1A/NONO/SIRT1/PINK1
GOBP_MEMBRANE_LIPID_BIOSYNTHETIC_PROCESS	GOBP_MEMBRANE_LIPID_BIOSYNTHETIC_PROCESS	124	0.204472	1.73746	0.00042317	0.0058887	0.00467896	3588	tags=25%, list=11%, signal=22%	PIGK/ELOVL5/ALDH3B2/GPAA1/PIGH/PIGP/SGPL1/PIGY/PIGB/PIGF/DPM1/DEGS1/ELOVL2/PIGC/DPM3/PIGM/PIGW/SGPP1/PIGT/B4GALT3/SPTLC2/PIGO/PIGG/SCCPDH/AGK/ELOVL6/ELOVL7/ELOVL1/ORMDL1/PIGN/SPTLC1
GOBP_INTERMEDIATE_FILAMENT_BASED_PROCESS	GOBP_INTERMEDIATE_FILAMENT_BASED_PROCESS	48	-0.45045	-1.87071	0.0004236	0.0058887	0.00467896	1724	tags=21%, list=5%, signal=20%	PKP1/KRT16/EVPL/ATXN3/SYNM/NES/KRT14/DES/KRT17/NEFH
GOBP_MATURATION_OF_5_8S_RRNA_FROM_TRICISTRONIC_RRNA_TRANSCRIPT_SSU_RRNA_5_8S_RRNA_LSU_RRNA	GOBP_MATURATION_OF_5_8S_RRNA_FROM_TRICISTRONIC_RRNA_TRANSCRIPT_SSU_RRNA_5_8S_RRNA_LSU_RRNA	23	0.43279	2.19534	0.000423788	0.0058887	0.00467896	2273	tags=30%, list=7%, signal=28%	RPS21/WDR12/RPP40/RRS1/EXOSC3/RCL1/EXOSC9
GOBP_DNA_REPLICATION_INITIATION	GOBP_DNA_REPLICATION_INITIATION	29	0.396418	2.15756	0.00042456	0.0058887	0.00467896	10333	tags=86%, list=33%, signal=58%	POLE4/PRIM2/POLE3/MCM4/GINS3/MCM2/PRIM1/CDT1/NBN/MCM5/CCNE2/WRNIP1/NOC3L/MCM6/WDR18/POLA1/MCM3/POLE2/CDC6/CDC34/LRWD1/TOPBP1/MCM7/MCM10/PURA
GOBP_THROMBIN_ACTIVATED_RECEPTOR_SIGNALING_PATHWAY	GOBP_THROMBIN_ACTIVATED_RECEPTOR_SIGNALING_PATHWAY	12	0.584306	2.26633	0.000426516	0.00590306	0.00469037	1653	tags=42%, list=5%, signal=39%	F2RL1/HPGD/IQGAP2/PLEK/SNCA
GOBP_NUCLEOSIDE_BISPHOSPHATE_BIOSYNTHETIC_PROCESS	GOBP_NUCLEOSIDE_BISPHOSPHATE_BIOSYNTHETIC_PROCESS	62	0.289255	1.87006	0.000428032	0.00591126	0.00469689	3452	tags=40%, list=11%, signal=36%	ELOVL5/ACSL1/DLD/PAPSS1/FASN/ACLY/PPCS/SLC35B2/ELOVL2/SLC35B3/DLAT/PDHX/ACAT1/ACSL3/PDHB/SLC25A1/HSD17B8/CBR4/HSD17B12/SCD/MLYCD/ELOVL6/PPT1/ELOVL7/ELOVL1
GOCC_NUCLEAR_UBIQUITIN_LIGASE_COMPLEX	GOCC_NUCLEAR_UBIQUITIN_LIGASE_COMPLEX	40	0.338167	1.97442	0.000430942	0.00593866	0.00471866	2253	tags=25%, list=7%, signal=23%	CDC20/ANAPC10/ANAPC13/BRCC3/UBE2C/ANAPC7/CBX4/BMI1/MAD2L2/ANAPC5
GOBP_NEGATIVE_REGULATION_OF_ERK1_AND_ERK2_CASCADE	GOBP_NEGATIVE_REGULATION_OF_ERK1_AND_ERK2_CASCADE	75	-0.399198	-1.78126	0.000436788	0.00600085	0.00476808	5729	tags=35%, list=18%, signal=28%	ARRB1/DUSP9/LIF/CRYBA1/MIR221/DUSP3/LMO3/SPRY2/TIMP3/PSCA/GBP1/TBC1D10C/MIR21/SPRY1/DUSP26/NDRG2/FBLN1/SEMA6A/ATF3/DUSP1/ADIPOQ/SYNJ2BP/ERRFI1/GSTP1/EMILIN1/WNK2
GOBP_MANNOSYLATION	GOBP_MANNOSYLATION	29	0.395538	2.15277	0.000437328	0.00600085	0.00476808	2768	tags=38%, list=9%, signal=35%	PIGB/ALG1/DPM1/DPY19L3/DPM3/PIGM/TMTC2/TMTC4/DPY19L4/ALG8/ALG9
GOCC_CUL4A_RING_E3_UBIQUITIN_LIGASE_COMPLEX	GOCC_CUL4A_RING_E3_UBIQUITIN_LIGASE_COMPLEX	11	0.625992	2.33429	0.000439454	0.00601714	0.00478101	11747	tags=100%, list=37%, signal=63%	RBX1/TRPC4AP/CDKN1B/CRBN/CUL4A/ARIH1/DET1/DTL/GLMN/ERCC8/DDB1
GOCC_FIBRILLAR_CENTER	GOCC_FIBRILLAR_CENTER	126	0.212786	1.75636	0.000443494	0.00605951	0.00481468	3387	tags=26%, list=11%, signal=23%	E2F5/CD2AP/UBE2N/LIPA/HEATR1/FOXA1/TRIM27/NRIP1/PTPN13/USO1/CHCHD1/BTBD10/MTDH/IP6K2/SNRPB2/SAP30L/APEX2/CDCA7L/LEO1/POLR2F/AFF4/PLRG1/PRMT7/DKC1/MRPL23/RPAIN/NONO/DUSP11/SMUG1/GAR1/SIRT1/THAP1/TXNRD1
GOMF_RNA_POLYMERASE_II_GENERAL_TRANSCRIPTION_INITIATION_FACTOR_ACTIVITY	GOMF_RNA_POLYMERASE_II_GENERAL_TRANSCRIPTION_INITIATION_FACTOR_ACTIVITY	38	0.349557	2.06265	0.000455954	0.0062165	0.00493942	2679	tags=32%, list=9%, signal=29%	DR1/GTF2A2/TAF7/TBPL1/TAF2/GTF2B/TAF10/GTF2E1/CCNH/TAF12/TAF9/GTF2H3
GOBP_NUCLEOTIDE_EXCISION_REPAIR_DNA_GAP_FILLING	GOBP_NUCLEOTIDE_EXCISION_REPAIR_DNA_GAP_FILLING	23	0.430543	2.18394	0.00045769	0.00622692	0.0049477	10752	tags=87%, list=34%, signal=57%	RPA3/UBB/RFC4/PCNA/RPS27A/RPA1/POLD2/RPA2/RFC3/RFC5/POLD4/UBC/LIG3/RFC2/POLD3/XRCC1/UBA52/LIG1/POLD1/RFC1
GOBP_NEGATIVE_REGULATION_OF_MUSCLE_HYPERTROPHY	GOBP_NEGATIVE_REGULATION_OF_MUSCLE_HYPERTROPHY	33	-0.51051	-1.95738	0.000472987	0.00641802	0.00509954	4780	tags=48%, list=15%, signal=41%	MIR214/TNFRSF1B/RGS4/GATA5/RGS2/TNFRSF1A/MIR21/IGFBP5/PAK1/LMNA/FOXO1/ERRFI1/SMAD3/NOTCH1/ATP2B4/PI16
GOBP_REGULATION_OF_STEM_CELL_DIFFERENTIATION	GOBP_REGULATION_OF_STEM_CELL_DIFFERENTIATION	106	0.233538	1.95514	0.00047374	0.00641802	0.00509954	2883	tags=26%, list=9%, signal=24%	PSMC4/PSMA3/PSMD6/PSMA6/PSMD10/PSMA5/OCIAD2/PSMB5/PSMD14/PSMA1/PSMA4/DHX36/PSMC2/PWP1/PSMB4/PSME2/PSMC6/PSMD7/PSMD2/PSMB2/YTHDF2/HSPA9/PSMB7/PSMD5/PSMB1/TACSTD2/PSMA2/METTL3
GOBP_NEGATIVE_REGULATION_OF_ANOIKIS	GOBP_NEGATIVE_REGULATION_OF_ANOIKIS	17	-0.623916	-2.02251	0.000476931	0.00644762	0.00512306	1604	tags=41%, list=5%, signal=39%	SNAI2/CEACAM6/BCL2/CAV1/NOTCH1/ITGA5/PDK4
GOMF_UBIQUITIN_PROTEIN_TRANSFERASE_REGULATOR_ACTIVITY	GOMF_UBIQUITIN_PROTEIN_TRANSFERASE_REGULATOR_ACTIVITY	18	0.470743	2.18601	0.000479909	0.00647423	0.0051442	2176	tags=28%, list=7%, signal=26%	RPS7/CDC20/TRIB3/TRIB1/RPL23
GOBP_RESPONSE_TO_PROGESTERONE	GOBP_RESPONSE_TO_PROGESTERONE	42	-0.468152	-1.89441	0.000481812	0.00647832	0.00514746	2216	tags=24%, list=7%, signal=22%	OXT/RAMP2/PTN/CAV1/CD38/CATSPER2/FOSL1/TGFB3/FOS/FOSB
GOBP_REGULATION_OF_AUTOPHAGOSOME_ASSEMBLY	GOBP_REGULATION_OF_AUTOPHAGOSOME_ASSEMBLY	36	0.353267	1.96426	0.000482235	0.00647832	0.00514746	3424	tags=36%, list=11%, signal=32%	RAB5A/BECN1/SH3GLB1/IFT20/TMEM39A/MTM1/SEC22B/PIP4K2A/RALB/TBC1D14/PIP4K2C/UBQLN2/PINK1
GOBP_MESENCHYME_MORPHOGENESIS	GOBP_MESENCHYME_MORPHOGENESIS	49	-0.451576	-1.88328	0.000485824	0.00651288	0.00517491	3674	tags=35%, list=12%, signal=31%	SNAI2/FOXC2/GATA5/ACTG2/BMP7/TBX2/SOX9/WNT3A/OSR1/SMAD3/ISL1/NOTCH1/ACTC1/FOXC1/FOXF1/DCHS1/ACTA1
GOMF_STRUCTURAL_CONSTITUENT_OF_MUSCLE	GOMF_STRUCTURAL_CONSTITUENT_OF_MUSCLE	41	-0.475492	-1.91675	0.000490455	0.00656125	0.00521335	1631	tags=41%, list=5%, signal=39%	MYBPC1/MYL3/ANKRD2/CAPN3/DMD/KRT19/MYBPC3/TPM1/OBSCN/TPM2/CSRP1/NEXN/SYNM/MYOM1/SMTN/MYL9/MYH11
GOBP_REGULATION_OF_LYSOSOMAL_LUMEN_PH	GOBP_REGULATION_OF_LYSOSOMAL_LUMEN_PH	14	0.552423	2.31835	0.000496161	0.00662375	0.00526301	3694	tags=57%, list=12%, signal=50%	SNAPIN/GRN/ATP6AP2/TMEM9/TMEM165/CCDC115/PPT1/TMEM199
GOBP_ENDOPLASMIC_RETICULUM_TUBULAR_NETWORK_ORGANIZATION	GOBP_ENDOPLASMIC_RETICULUM_TUBULAR_NETWORK_ORGANIZATION	17	0.490649	2.18666	0.000506591	0.00674893	0.00536247	2870	tags=53%, list=9%, signal=48%	RAB18/REEP3/RAB10/ARL6IP1/ATL1/ATL2/ATL3/RTN4/TMEM33
GOBP_NEGATIVE_REGULATION_OF_EPITHELIAL_CELL_DIFFERENTIATION	GOBP_NEGATIVE_REGULATION_OF_EPITHELIAL_CELL_DIFFERENTIATION	45	-0.456312	-1.87063	0.000509339	0.00677146	0.00538037	3702	tags=36%, list=12%, signal=31%	SMO/MIR18B/S1PR3/SPRY2/TBX3/NOTCH4/VEGFA/SPRY1/SOX9/DLL1/FOXJ2/OSR1/CAV1/NOTCH1/ID1/TP63
GOBP_GLYCEROL_ETHER_METABOLIC_PROCESS	GOBP_GLYCEROL_ETHER_METABOLIC_PROCESS	17	0.489564	2.18182	0.000514325	0.00680019	0.0054032	1528	tags=35%, list=5%, signal=34%	TXN/PEX7/PLA2G7/CHPT1/FASN/GNPAT
GOBP_PROTEIN_IMPORT_INTO_MITOCHONDRIAL_MATRIX	GOBP_PROTEIN_IMPORT_INTO_MITOCHONDRIAL_MATRIX	17	0.489491	2.18149	0.000514325	0.00680019	0.0054032	11010	tags=94%, list=35%, signal=61%	DNAJC19/TOMM20/TIMM23/ROMO1/GRPEL2/GRPEL1/TOMM40/TOMM7/TIMM17B/DNLZ/TIMM23B/TIMM50/TOMM40L/TIMM44/TOMM20L/TIMM17A
GOBP_POSITIVE_REGULATION_OF_STRESS_FIBER_ASSEMBLY	GOBP_POSITIVE_REGULATION_OF_STRESS_FIBER_ASSEMBLY	48	-0.446025	-1.85234	0.000514683	0.00680019	0.0054032	4623	tags=35%, list=15%, signal=30%	SFRP1/APOA1/BAG4/LIMK1/S100A10/SORBS3/ARHGEF10/PPM1F/TPM1/EVL/PAK1/LPAR1/SMAD3/FERMT2/RAPGEF3/TGFB3/SERPINF2
GOCC_PROTEASOME_CORE_COMPLEX_BETA_SUBUNIT_COMPLEX	GOCC_PROTEASOME_CORE_COMPLEX_BETA_SUBUNIT_COMPLEX	11	0.619062	2.30845	0.000520941	0.0068687	0.00545764	4584	tags=73%, list=15%, signal=62%	PSMB5/PSMB4/PSMB2/PSMB7/PSMB1/PSMB6/PSMB9/PSMB3
GOMF_PROTEIN_TRANSMEMBRANE_TRANSPORTER_ACTIVITY	GOMF_PROTEIN_TRANSMEMBRANE_TRANSPORTER_ACTIVITY	20	0.457325	2.1857	0.000534197	0.00702903	0.00558502	2027	tags=25%, list=6%, signal=23%	TMED10/SEC61G/TOMM20/TIMM23/ABCA1
GOBP_PROTEIN_DEMANNOSYLATION	GOBP_PROTEIN_DEMANNOSYLATION	17	0.488493	2.17705	0.000537528	0.00705835	0.00560833	3959	tags=47%, list=13%, signal=41%	EDEM1/SEL1L/RNF103/EDEM2/DERL2/OS9/AMFR/RNF5
GOCC_TRANSCRIPTION_FACTOR_TFIID_COMPLEX	GOCC_TRANSCRIPTION_FACTOR_TFIID_COMPLEX	33	0.352942	2.00898	0.00056529	0.00740772	0.00588592	2993	tags=33%, list=10%, signal=30%	GTF2A2/TAF7/GTF2H5/TAF2/GTF2B/TAF10/GTF2E1/TAF12/TAF9/GTF2H3/TCEA1
GOBP_LATE_ENDOSOME_TO_VACUOLE_TRANSPORT_VIA_MULTIVESICULAR_BODY_SORTING_PATHWAY	GOBP_LATE_ENDOSOME_TO_VACUOLE_TRANSPORT_VIA_MULTIVESICULAR_BODY_SORTING_PATHWAY	16	0.508382	2.25027	0.000572075	0.00748133	0.00594441	8066	tags=81%, list=26%, signal=60%	CHMP5/CHMP4C/VPS25/STAM/LEPROTL1/VTA1/TMEM50A/VPS28/CHMP4B/SNF8/LEPROT/CHMP7/CHMP6
GOMF_PROTEIN_TRANSPORTER_ACTIVITY	GOMF_PROTEIN_TRANSPORTER_ACTIVITY	26	0.41074	2.18391	0.000576153	0.00750808	0.00596566	3879	tags=38%, list=12%, signal=34%	TMED10/SEC61G/TOMM20/TIMM23/ABCA1/TIMM9/TOMM40/TIMM10/TIMM8B/TOMM22
GOBP_EPITHELIAL_TO_MESENCHYMAL_TRANSITION	GOBP_EPITHELIAL_TO_MESENCHYMAL_TRANSITION	145	-0.328674	-1.61382	0.000576463	0.00750808	0.00596566	3279	tags=22%, list=10%, signal=20%	SPRY2/AMELX/DDX17/EPHA3/NOTCH4/TCF7L2/BCL9L/MIR21/DLG5/BMP7/SPRY1/GATA3/SOX9/CLASP1/GLIPR2/ZNF750/PDPN/IL17RD/FOXF2/SMAD3/DACT3/ISL1/NOTCH1/FOXC1/FERMT2/AKNA/PHLDB1/TGFB1I1/TGFB3/IL6/TGFBR3/FLNA
GOBP_MATURATION_OF_SSU_RRNA_FROM_TRICISTRONIC_RRNA_TRANSCRIPT_SSU_RRNA_5_8S_RRNA_LSU_RRNA	GOBP_MATURATION_OF_SSU_RRNA_FROM_TRICISTRONIC_RRNA_TRANSCRIPT_SSU_RRNA_5_8S_RRNA_LSU_RRNA	30	0.394257	2.15886	0.000577965	0.00751238	0.00596908	3630	tags=43%, list=12%, signal=38%	RPS21/RPP40/GTF2H5/HEATR1/RRS1/RCL1/MRPS11/RPS8/BYSL/RPS14/TSR2/UTP6/NGDN
GOBP_INTRINSIC_APOPTOTIC_SIGNALING_PATHWAY_IN_RESPONSE_TO_OXIDATIVE_STRESS	GOBP_INTRINSIC_APOPTOTIC_SIGNALING_PATHWAY_IN_RESPONSE_TO_OXIDATIVE_STRESS	42	0.33498	1.97608	0.000594597	0.00771291	0.00612842	3488	tags=43%, list=11%, signal=38%	PPIA/NME5/PDCD10/HTRA2/TRAP1/PARK7/UBQLN1/SOD1/MELK/CYP1B1/HIF1A/ARL6IP5/NONO/ZNF622/SIRT1/PINK1/SFPQ/P4HB
GOMF_UBIQUITIN_LIKE_PROTEIN_SPECIFIC_PROTEASE_ACTIVITY	GOMF_UBIQUITIN_LIKE_PROTEIN_SPECIFIC_PROTEASE_ACTIVITY	19	0.467376	2.21294	0.000596631	0.00772365	0.00613695	11843	tags=89%, list=38%, signal=56%	UCHL3/COPS5/COPS4/SENP2/UFSP2/COPS2/USP21/SENP3/OTUB2/SENP5/SENP7/SENP6/USP50/SENP8/USP25/OTUB1/USPL1
GOBP_DEVELOPMENTAL_GROWTH_INVOLVED_IN_MORPHOGENESIS	GOBP_DEVELOPMENTAL_GROWTH_INVOLVED_IN_MORPHOGENESIS	219	-0.302234	-1.53417	0.000610286	0.0078845	0.00626475	3503	tags=22%, list=11%, signal=20%	LIMK1/LLPH/FLRT1/SPRY2/SLIT1/HDAC6/RNF157/CRABP2/PLXNA1/BCL11A/SEMA3A/PPP3CB/TRIM46/MED12/PTK7/ULK2/LRP1/CPNE6/TNN/PLXNA4/HOXD13/VEGFA/SLIT3/RUFY3/SYT17/SPRY1/ARHGAP4/TBX2/PAK1/NLGN3/SOX9/SEMA4C/TNC/VCL/SRF/SEMA6A/WNT3A/AUTS2/SEMA3F/SEMA3B/SH3GL2/SLIT2/RND2/NOTCH1/SEMA3E/BIN3/FLRT3/EIF2AK4/LAMB2
GOBP_METAPHASE_ANAPHASE_TRANSITION_OF_CELL_CYCLE	GOBP_METAPHASE_ANAPHASE_TRANSITION_OF_CELL_CYCLE	62	0.284183	1.83727	0.000649611	0.00837567	0.00665502	2938	tags=27%, list=9%, signal=25%	CDC20/NSMCE2/PSMG2/RIOK2/UBE2C/LCMT1/BUB1/ANAPC7/AURKB/MAD2L1BP/DLGAP5/MAD2L2/TACC3/ANAPC5/RB1/CDT1/MAD2L1
GOBP_SKIN_MORPHOGENESIS	GOBP_SKIN_MORPHOGENESIS	11	-0.688681	-1.94648	0.000652432	0.00839514	0.0066705	1107	tags=36%, list=4%, signal=35%	SRF/ITGB4/ERRFI1/TP63
GOMF_MONOCARBOXYLIC_ACID_BINDING	GOMF_MONOCARBOXYLIC_ACID_BINDING	70	-0.404201	-1.78639	0.000658924	0.00846169	0.00672337	4388	tags=29%, list=14%, signal=25%	UCP1/ACOXL/LCN12/GSTA1/CRABP2/PPARD/CRABP1/UGT1A7/OXER1/RXRA/RARA/PMP2/FABP3/SERPINA5/S100A8/GSTP1/PTGDS/ACOX2/GSTM2/ACACB
GOBP_URETER_DEVELOPMENT	GOBP_URETER_DEVELOPMENT	18	-0.590714	-1.94034	0.000664738	0.00851928	0.00676913	3933	tags=50%, list=13%, signal=44%	SOX17/EMX2/TBX18/GATA3/SOX9/OSR1/ALDH1A2/NPHP3/FOXF1
GOBP_GUANOSINE_CONTAINING_COMPOUND_METABOLIC_PROCESS	GOBP_GUANOSINE_CONTAINING_COMPOUND_METABOLIC_PROCESS	37	0.341946	1.88938	0.000704929	0.00901634	0.00716408	3843	tags=35%, list=12%, signal=31%	GMPS/RAN/HPRT1/NME5/NME7/GNAI3/NME1/GMPR2/GUK1/ENTPD7/IMPDH2/CASK/NME3
GOBP_ENDOPLASMIC_RETICULUM_MANNOSE_TRIMMING	GOBP_ENDOPLASMIC_RETICULUM_MANNOSE_TRIMMING	13	0.578367	2.28993	0.00071188	0.00906904	0.00720595	3959	tags=62%, list=13%, signal=54%	EDEM1/SEL1L/RNF103/EDEM2/DERL2/OS9/AMFR/RNF5
GOBP_PTERIDINE_CONTAINING_COMPOUND_BIOSYNTHETIC_PROCESS	GOBP_PTERIDINE_CONTAINING_COMPOUND_BIOSYNTHETIC_PROCESS	13	0.577783	2.28762	0.00071188	0.00906904	0.00720595	3343	tags=46%, list=11%, signal=41%	PTS/PCBD1/QDPR/MTHFS/GART/MTHFD1
GOBP_SMOOTH_MUSCLE_CELL_PROLIFERATION	GOBP_SMOOTH_MUSCLE_CELL_PROLIFERATION	149	-0.328219	-1.61582	0.000722581	0.0091871	0.00729975	5217	tags=29%, list=17%, signal=24%	FOXP1/MIR1298/MIR221/MIR26A1/MIR214/NR4A3/MIR34A/IL6R/MIR638/P2RY6/HTR1B/EDN1/PPARD/ELN/MFN2/FGF2/FGF9/TCF7L2/MYOCD/TGM2/MIR21/IGFBP5/TPM1/ELANE/CCL5/PAK1/NDRG2/JUN/EFEMP2/FOXJ2/ADIPOQ/HBEGF/GSTP1/PPARGC1A/IL10/IL18/ADAMTS1/CX3CL1/TGFB3/SERPINF2/IL6/RBPMS2/CNN1
GOBP_GLUTAMINE_METABOLIC_PROCESS	GOBP_GLUTAMINE_METABOLIC_PROCESS	20	0.448429	2.14318	0.000733974	0.00931348	0.00740018	1052	tags=25%, list=3%, signal=24%	GMPS/GFPT1/PPAT/NIT2/ASNSD1
GOBP_APOPTOTIC_MITOCHONDRIAL_CHANGES	GOBP_APOPTOTIC_MITOCHONDRIAL_CHANGES	108	0.219501	1.78693	0.000750031	0.00949842	0.00754712	2352	tags=20%, list=7%, signal=19%	TMEM14A/BIK/GGCT/SLC25A5/PSMD10/YWHAQ/PDCD5/MMP9/FAM162A/TFDP1/MLLT11/YWHAZ/BNIP3/MOAP1/BAD/YWHAG/ATG3/VPS35/PPP2CB/FIS1/SLC25A4/PRELID1
GOMF_CORECEPTOR_ACTIVITY	GOMF_CORECEPTOR_ACTIVITY	43	-0.464361	-1.88836	0.00075347	0.00950828	0.00755496	3172	tags=30%, list=10%, signal=27%	IGSF1/FCRL1/CD80/ROR1/PTK7/LRP1/NGFR/RAMP2/RGMA/CSPG4/LRP5L/TGFBR3/ROR2
GOMF_LIGASE_ACTIVITY_FORMING_CARBON_SULFUR_BONDS	GOMF_LIGASE_ACTIVITY_FORMING_CARBON_SULFUR_BONDS	40	0.329613	1.92448	0.000753777	0.00950828	0.00755496	3549	tags=40%, list=11%, signal=36%	SLC27A2/ACSM1/UBA3/ACSL1/AACS/SUCLG2/UBA5/SUCLA2/ACSL3/UBA6/SLC27A5/SAE1/UBA2/NAE1/SUCLG1/ACSM3
GOBP_ERROR_PRONE_TRANSLESION_SYNTHESIS	GOBP_ERROR_PRONE_TRANSLESION_SYNTHESIS	20	0.446498	2.13396	0.000760032	0.00954836	0.0075868	3393	tags=45%, list=11%, signal=40%	RPA3/UBB/RFC4/PCNA/MAD2L2/RPS27A/RPA1/RPA2/RFC3
GOBP_REGULATION_OF_CYCLIN_DEPENDENT_PROTEIN_KINASE_ACTIVITY	GOBP_REGULATION_OF_CYCLIN_DEPENDENT_PROTEIN_KINASE_ACTIVITY	99	0.221966	1.76085	0.000762888	0.00954836	0.0075868	1066	tags=12%, list=3%, signal=12%	CCNO/CDKN3/CKS1B/CCNG2/CCNB2/CCNC/CKS2/PSMD10/IPO7/CDC25C/CDK4/CEBPA
GOBP_POSITIVE_REGULATION_OF_PROTEIN_LOCALIZATION_TO_MEMBRANE	GOBP_POSITIVE_REGULATION_OF_PROTEIN_LOCALIZATION_TO_MEMBRANE	113	-0.344915	-1.64743	0.000764002	0.00954836	0.0075868	4228	tags=22%, list=13%, signal=19%	PDZK1/AKAP5/DPP10/SPTBN1/GZMB/EPHA3/EPHA2/LRP1/STAC/LRP4/SLC5A3/BCL2/PAK1/SORBS1/ZDHHC8/WNT3A/PTN/ITGA3/KCNB1/SFN/ATP2B4/PPP1R13B/NKD2/TP63/CLIP3
GOBP_REGULATION_OF_VASCULAR_ASSOCIATED_SMOOTH_MUSCLE_CELL_PROLIFERATION	GOBP_REGULATION_OF_VASCULAR_ASSOCIATED_SMOOTH_MUSCLE_CELL_PROLIFERATION	76	-0.391237	-1.75069	0.000764002	0.00954836	0.0075868	10933	tags=57%, list=35%, signal=37%	GJA1/MIR339/MIR503/MIR27B/MIR185/CDKN1A/MIR135B/MIR182/LDLRAP1/MIR27A/MIR208A/MIR15A/MMP2/MIR1-1/MIR448/PRKG1/MIR1298/MIR221/MIR26A1/MIR214/NR4A3/MIR34A/MIR638/P2RY6/HTR1B/EDN1/MFN2/FGF2/FGF9/MYOCD/MIR21/IGFBP5/TPM1/PAK1/JUN/EFEMP2/FOXJ2/ADIPOQ/GSTP1/IL10/ADAMTS1/TGFB3/CNN1
GOBP_CYTOPLASM_ORGANIZATION	GOBP_CYTOPLASM_ORGANIZATION	11	-0.682536	-1.92911	0.000765895	0.00954836	0.0075868	752	tags=27%, list=2%, signal=27%	ETV6/FOSL1/TFCP2L1
GOMF_STRUCTURAL_MOLECULE_ACTIVITY_CONFERRING_ELASTICITY	GOMF_STRUCTURAL_MOLECULE_ACTIVITY_CONFERRING_ELASTICITY	11	-0.682512	-1.92905	0.000765895	0.00954836	0.0075868	2590	tags=55%, list=8%, signal=50%	ELN/EMILIN3/FBLN5/FBLN2/FBN2/EMILIN1
GOBP_CLEAVAGE_INVOLVED_IN_RRNA_PROCESSING	GOBP_CLEAVAGE_INVOLVED_IN_RRNA_PROCESSING	25	0.400876	2.11767	0.000768479	0.00956197	0.00759761	2273	tags=28%, list=7%, signal=26%	RPS21/NHP2/RPP40/RRS1/EXOSC3/RCL1/EXOSC9
GOMF_PROTEASOME_BINDING	GOMF_PROTEASOME_BINDING	14	0.537823	2.25708	0.000777149	0.00965111	0.00766845	1213	tags=36%, list=4%, signal=34%	UCHL5/ZFAND1/PSMD14/PSMG1/RAD23B
GOMF_RNA_METHYLTRANSFERASE_ACTIVITY	GOMF_RNA_METHYLTRANSFERASE_ACTIVITY	46	0.312297	1.82252	0.000779131	0.00965701	0.00767313	16469	tags=91%, list=52%, signal=43%	TFB2M/METTL5/TRMT112/LCMT2/BCDIN3D/THUMPD3/METTL6/FTSJ1/METTL3/METTL14/TRMT5/NSUN2/TRMT12/METTL1/FBL/EMG1/NSUN4/TFB1M/ALKBH8/NSUN3/TRDMT1/WDR4/TRMT11/TARBP1/TRMT6/TRMT2B/MEPCE/RNMT/ZCCHC4/METTL4/METTL2A/FDXACB1/TGS1/NOP2/NSUN6/THUMPD2/TRMT2A/NSUN5/METTL2B/METTL8/TRMT1/FTSJ3
GOMF_FATTY_ACID_BINDING	GOMF_FATTY_ACID_BINDING	36	-0.474231	-1.86351	0.000783467	0.009692	0.00770094	4388	tags=33%, list=14%, signal=29%	UCP1/ACOXL/GSTA1/PPARD/OXER1/PMP2/FABP3/S100A8/GSTP1/PTGDS/ACOX2/GSTM2
GOBP_PROTEIN_DENEDDYLATION	GOBP_PROTEIN_DENEDDYLATION	10	0.650846	2.35696	0.000790096	0.00975518	0.00775113	3037	tags=50%, list=10%, signal=45%	COPS5/COPS4/COPS3/COPS8/TOR1A
GOMF_INTEGRIN_BINDING	GOMF_INTEGRIN_BINDING	134	-0.337123	-1.6406	0.000799429	0.00985142	0.00782761	2526	tags=19%, list=8%, signal=17%	FGF2/FERMT1/TNN/ICAM5/ADAM17/FBLN5/ITGB4/PTN/ITGA3/COL5A1/ACTN4/ADAMTS8/JAM3/NISCH/TLN1/ACTN1/EMILIN1/FERMT2/CX3CL1/LTBP4/COL16A1/PRKCA/CD177/LAMB2/ITGA5
GOMF_STRUCTURAL_CONSTITUENT_OF_CYTOSKELETON	GOMF_STRUCTURAL_CONSTITUENT_OF_CYTOSKELETON	95	-0.36581	-1.70255	0.000809218	0.00994294	0.00790033	4180	tags=27%, list=13%, signal=24%	KRT6A/NEFL/KRT19/ACTL7B/SPTBN2/SPTBN1/TUBB1/SPTBN4/CROCC/SORBS3/AGRN/KRT16/TPM1/MSN/SPTAN1/TUBA4A/VILL/TUBG2/TLN1/SYNM/ACTA1/KRT14/KRT5/DES/KRT15/NEFH
GOBP_RESPONSE_TO_COPPER_ION	GOBP_RESPONSE_TO_COPPER_ION	36	0.340439	1.89293	0.000809959	0.00994294	0.00790033	16593	tags=94%, list=53%, signal=45%	SORD/BECN1/ATP7A/SNCA/PARK7/SOD1/MT1B/MT1M/MT1H/APP/MT1F/MT1G/CYP1A1/PAM/NFE2L2/BACE1/PRNP/AQP1/MT1X/ATP7B/CYP1A2/MT1A/HSF1/MT2A/DAXX/LOXL2/MT1E/MAP1LC3A/MT3/AANAT/IL1A/ICAM1/MT4/S100A13
GOBP_VESICLE_CARGO_LOADING	GOBP_VESICLE_CARGO_LOADING	23	0.417221	2.11636	0.000832292	0.0101976	0.00810264	1548	tags=22%, list=5%, signal=21%	TMED10/SEC23B/TMED2/SEC24D/SEC13
GOBP_POSITIVE_REGULATION_OF_TELOMERASE_ACTIVITY	GOBP_POSITIVE_REGULATION_OF_TELOMERASE_ACTIVITY	32	0.370537	2.04697	0.000888209	0.0108587	0.00862794	3913	tags=47%, list=12%, signal=41%	MYC/PTGES3/CCT2/TCP1/XRCC5/AURKB/HSP90AB1/MAPKAPK5/DKC1/CCT4/PNKP/HSP90AA1/NAF1/GRHL2/PKIB
GOCC_PROTEIN_COMPLEX_INVOLVED_IN_CELL_ADHESION	GOCC_PROTEIN_COMPLEX_INVOLVED_IN_CELL_ADHESION	36	-0.471651	-1.85337	0.000890523	0.0108587	0.00862794	3229	tags=31%, list=10%, signal=27%	ITGA2B/CD80/ITGA7/ITGA9/ITGB4/ITGA3/ITGA10/JAM3/EMILIN1/ITGA5/ITGA8
GOBP_FOCAL_ADHESION_ASSEMBLY	GOBP_FOCAL_ADHESION_ASSEMBLY	80	-0.381363	-1.72486	0.000891334	0.0108587	0.00862794	7527	tags=38%, list=24%, signal=29%	ARHGAP6/PTK2B/SDC4/TAOK2/ACVRL1/MACF1/DUSP3/GPM6B/SFRP1/EPB41L5/S100A10/CORO1C/EPHA3/CORO2B/LRP1/DLC1/SLC9A1/VEGFA/PPM1F/BCL2/SORBS1/VCL/CLASP1/DAPK3/TRIP6/SMAD3/ACTN1/FERMT2/COL16A1/FAM107A
GOBP_REGULATION_OF_EPITHELIAL_TO_MESENCHYMAL_TRANSITION	GOBP_REGULATION_OF_EPITHELIAL_TO_MESENCHYMAL_TRANSITION	95	-0.363816	-1.69327	0.000893413	0.0108634	0.00863166	2106	tags=22%, list=7%, signal=21%	TCF7L2/BCL9L/MIR21/BMP7/SPRY1/GATA3/CLASP1/GLIPR2/ZNF750/PDPN/IL17RD/SMAD3/DACT3/ISL1/NOTCH1/FOXC1/FERMT2/PHLDB1/TGFB1I1/TGFB3/IL6
GOBP_POSITIVE_REGULATION_OF_SMOOTH_MUSCLE_CELL_PROLIFERATION	GOBP_POSITIVE_REGULATION_OF_SMOOTH_MUSCLE_CELL_PROLIFERATION	90	-0.372724	-1.71788	0.00089524	0.010865	0.00863293	5217	tags=32%, list=17%, signal=27%	FOXP1/MIR221/MIR26A1/MIR214/NR4A3/IL6R/P2RY6/HTR1B/EDN1/MFN2/FGF2/FGF9/TGM2/MIR21/IGFBP5/ELANE/CCL5/PAK1/JUN/FOXJ2/HBEGF/PPARGC1A/IL10/IL18/ADAMTS1/CX3CL1/SERPINF2/IL6/RBPMS2
GOBP_REGULATION_OF_BROWN_FAT_CELL_DIFFERENTIATION	GOBP_REGULATION_OF_BROWN_FAT_CELL_DIFFERENTIATION	20	-0.560146	-1.90753	0.000898928	0.0108891	0.00865211	3031	tags=35%, list=10%, signal=32%	TFE3/SOX13/BMP7/PIM1/FNDC5/HNRNPU/LEP
GOBP_ORGANELLE_DISASSEMBLY	GOBP_ORGANELLE_DISASSEMBLY	93	0.221537	1.66081	0.000911269	0.0110178	0.00875434	4038	tags=35%, list=13%, signal=31%	ZFAND1/MCTS1/UBA5/FUNDC1/BECN1/UFM1/HAX1/GABARAPL2/CAMKK2/PELO/CISD2/HTRA2/BNIP3/UFC1/PARK7/VDAC1/ATG3/FIS1/TSPO/HIF1A/DDRGK1/VCP/RNF41/CTSK/MTIF3/PINK1/TEX264/RB1CC1/WIPI1/KIF5B/VRK1/DNM1L/HK2
GOBP_NCRNA_3_END_PROCESSING	GOBP_NCRNA_3_END_PROCESSING	37	0.335599	1.85431	0.000927535	0.0111933	0.00889382	2635	tags=22%, list=8%, signal=20%	RPS21/EXOSC5/POLR3K/EXOSC4/HSD17B10/EXOSC3/EXOSC9/DKC1
GOMF_5S_RRNA_BINDING	GOMF_5S_RRNA_BINDING	10	0.638458	2.3121	0.000938569	0.0113052	0.0089827	4990	tags=90%, list=16%, signal=76%	MRPL18/RRS1/TST/GTF3A/RPL3/RPL5/RPF2/EEF2/RPL11
GOMF_GLUTATHIONE_PEROXIDASE_ACTIVITY	GOMF_GLUTATHIONE_PEROXIDASE_ACTIVITY	22	-0.564209	-1.9828	0.000955436	0.0114867	0.00912698	3587	tags=32%, list=11%, signal=28%	PTGES/GSTA1/GPX8/GSTP1/GPX2/GPX3/GSTM2
GOCC_NUCLEAR_PORE	GOCC_NUCLEAR_PORE	78	0.245464	1.75384	0.000961913	0.011543	0.00917164	3789	tags=33%, list=12%, signal=29%	RAN/ENY2/NUP37/IPO7/PARP11/SEH1L/SEC13/RANBP1/KPNA1/NUP54/CETN2/KPNB1/NUP205/NUP35/NUP62/NUP88/NUP153/MAD2L1/SNUPN/NUP160/NXT1/NUTF2/XPO7/NUP85/SENP2/RANBP3L
GOMF_OXIDOREDUCTASE_ACTIVITY_ACTING_ON_THE_ALDEHYDE_OR_OXO_GROUP_OF_DONORS_NAD_OR_NADP_AS_ACCEPTOR	GOMF_OXIDOREDUCTASE_ACTIVITY_ACTING_ON_THE_ALDEHYDE_OR_OXO_GROUP_OF_DONORS_NAD_OR_NADP_AS_ACCEPTOR	36	0.337339	1.87569	0.000969232	0.0115971	0.00921466	3270	tags=36%, list=10%, signal=32%	ALDH3B2/ALDH1A3/DLD/AKR1C3/ALDH7A1/DLAT/PDHX/ALDH1A1/PDHB/ALDH9A1/HSD17B12/ADH5/ALDH6A1
GOBP_NUCLEAR_TRANSCRIBED_MRNA_CATABOLIC_PROCESS_DEADENYLATION_DEPENDENT_DECAY	GOBP_NUCLEAR_TRANSCRIBED_MRNA_CATABOLIC_PROCESS_DEADENYLATION_DEPENDENT_DECAY	68	0.253899	1.72881	0.000970975	0.0115971	0.00921466	3127	tags=32%, list=10%, signal=29%	EXOSC5/LSM3/EXOSC4/WDR61/EXOSC3/DHX36/POLR2D/CNOT7/LSM7/TTC37/LSM4/CNOT8/LSM5/RC3H2/TOB1/CNOT6/EXOSC9/MLH1/PDE12/POLR2G/LSM2/CNOT10
GOCC_H4_HISTONE_ACETYLTRANSFERASE_COMPLEX	GOCC_H4_HISTONE_ACETYLTRANSFERASE_COMPLEX	38	0.334401	1.97322	0.000971854	0.0115971	0.00921466	2527	tags=24%, list=8%, signal=22%	MORF4L2/ACTL6A/DR1/YEATS4/RUVBL1/POLE4/POLE3/RUVBL2/MORF4L1
GOBP_TRANSCYTOSIS	GOBP_TRANSCYTOSIS	19	0.454576	2.15233	0.000973813	0.0115989	0.00921607	3180	tags=47%, list=10%, signal=43%	MAL2/RAB5A/USO1/CLTC/VPS35/RAB17/LRPAP1/RAB11A/PICALM
GOCC_INTERMEDIATE_FILAMENT	GOCC_INTERMEDIATE_FILAMENT	181	-0.310636	-1.55368	0.000987807	0.0117437	0.00933116	8110	tags=35%, list=26%, signal=26%	KRTAP24-1/KRTAP12-1/KRTAP15-1/KRT79/KRTAP6-1/KRT76/KRTAP20-1/KRTAP4-11/KRTAP4-2/KRTAP9-8/KRTAP4-4/KRTAP1-5/KRTAP13-3/KRTAP4-1/INA/KRTAP7-1/KRTAP19-1/MACF1/KRTAP10-1/KRTAP5-10/KRT85/UPP2/KRT4/PPL/KRTAP9-4/NARF/KRTAP2-1/KRTAP6-3/KRT12/DST/KRTAP10-3/KRT6A/NEFL/KRTAP19-6/KRTAP3-2/KRTAP5-11/KRT19/KRT27/KRTAP10-12/KRT78/KRTAP12-2/KRTAP21-2/KRTAP11-1/IFFO2/KRTAP4-12/KRT23/PNN/ADORA2A/PKP1/KRT16/EVPL/IFF…
GOMF_AROMATIC_AMINO_ACID_TRANSMEMBRANE_TRANSPORTER_ACTIVITY	GOMF_AROMATIC_AMINO_ACID_TRANSMEMBRANE_TRANSPORTER_ACTIVITY	10	-0.693659	-1.91128	0.000994753	0.0118044	0.00937938	3353	tags=50%, list=11%, signal=45%	SLC36A4/SLC16A10/SLC38A5/SLC7A5/SLC38A7
GOBP_RESPONSE_TO_LEAD_ION	GOBP_RESPONSE_TO_LEAD_ION	22	0.425355	2.13649	0.000997505	0.0118152	0.00938794	3468	tags=45%, list=11%, signal=40%	CDK4/BECN1/QDPR/ATP7A/PPP1CA/CAT/PPP2CB/PPP2CA/PPP5C/APP
GOBP_IMP_BIOSYNTHETIC_PROCESS	GOBP_IMP_BIOSYNTHETIC_PROCESS	10	0.635459	2.30124	0.0010022	0.0118489	0.00941472	3509	tags=50%, list=11%, signal=44%	HPRT1/PPAT/ADSL/GART/PAICS
GOBP_BROWN_FAT_CELL_DIFFERENTIATION	GOBP_BROWN_FAT_CELL_DIFFERENTIATION	43	-0.457078	-1.85874	0.00100634	0.0118759	0.0094362	5435	tags=37%, list=17%, signal=31%	INS/SLC2A4/UCP1/TFE3/CEBPB/RGS2/FABP3/SOX13/BMP7/PIM1/ZNF516/FNDC5/ADIPOQ/PPARGC1A/HNRNPU/LEP
GOBP_NEGATIVE_REGULATION_OF_NEURON_APOPTOTIC_PROCESS	GOBP_NEGATIVE_REGULATION_OF_NEURON_APOPTOTIC_PROCESS	129	-0.338823	-1.64206	0.0010144	0.011949	0.00949431	3487	tags=24%, list=11%, signal=21%	CCL2/CNTFR/UNC5B/NTF3/CLCF1/NTF4/BTG2/POU4F1/AXL/CEBPB/LRP1/WFS1/ADORA2A/NFATC4/BCL2/NRBP2/MAP3K12/ANGPT1/NR4A2/TYRO3/HIPK2/FZD9/ISL1/PPARGC1A/IL10/XRCC2/CX3CL1/TGFB3/NES/FOXQ1/FAIM2
GOBP_REGULATION_OF_TRANSLATIONAL_FIDELITY	GOBP_REGULATION_OF_TRANSLATIONAL_FIDELITY	13	0.564971	2.2369	0.001022	0.0120164	0.00954786	7449	tags=85%, list=24%, signal=65%	IARS2/EIF2S3/RPS5/RPS9/DTD1/LARS2/CDK5RAP1/VARS2/TARS2/YRDC/GATC
GOCC_SMN_SM_PROTEIN_COMPLEX	GOCC_SMN_SM_PROTEIN_COMPLEX	17	0.468379	2.08741	0.00103373	0.0120869	0.00960386	4178	tags=53%, list=13%, signal=46%	GEMIN6/SNRPF/STRAP/SNRPB/SNRPG/GEMIN8/SNRPD2/SNRPD1/GEMIN4
GOBP_RRNA_3_END_PROCESSING	GOBP_RRNA_3_END_PROCESSING	10	0.634162	2.29654	0.00103402	0.0120869	0.00960386	11490	tags=100%, list=37%, signal=63%	RPS21/EXOSC3/EXOSC9/EXOSC7/ERI3/EXOSC2/ERI2/EXOSC10/EXOSC8/ERI1
GOBP_RNA_EXPORT_FROM_NUCLEUS	GOBP_RNA_EXPORT_FROM_NUCLEUS	120	0.203467	1.77772	0.00103427	0.0120869	0.00960386	3354	tags=27%, list=11%, signal=24%	RAN/ABCE1/NMD3/ENY2/THOC7/NUP37/SLBP/RIOK2/SEH1L/RRS1/POLR2D/SEC13/RPS15/MAGOH/HNRNPA1/THOC3/EIF4A3/NUP54/CPSF2/CPSF3/XPO1/KHDRBS1/RBM15B/NUP205/NUP35/NUP62/NUP88/NUP153/NCBP2/NUP160/NXT1/NSUN2
GOBP_COLLAGEN_FIBRIL_ORGANIZATION	GOBP_COLLAGEN_FIBRIL_ORGANIZATION	51	-0.430491	-1.80725	0.00103554	0.0120869	0.00960386	7365	tags=37%, list=23%, signal=29%	COL14A1/FKBP10/OPTC/TNXA/SERPINH1/ADAMTS2/NF1/FOXC2/COL5A3/LOXL4/EFEMP2/COL5A1/COL13A1/DDR2/FOXC1/EMILIN1/AEBP1/SERPINF2/DPT
GOBP_REGULATION_OF_TRANSCRIPTION_INVOLVED_IN_G1_S_TRANSITION_OF_MITOTIC_CELL_CYCLE	GOBP_REGULATION_OF_TRANSCRIPTION_INVOLVED_IN_G1_S_TRANSITION_OF_MITOTIC_CELL_CYCLE	26	0.395772	2.10432	0.00104277	0.0121493	0.00965338	18977	tags=100%, list=60%, signal=40%	TFDP1/TYMS/PCNA/RB1/RRM2/CDT1/CDK5/E2F1/POLA1/NPAT/TFDP2/ESRRB/FBXO5/KLF11/DHFR/CDC6/ID2/BACH1/HINFP/CCNA1/CCNE1/E2F4/E2F7/BRD4/E2F6/GFI1
GOBP_CARDIOBLAST_DIFFERENTIATION	GOBP_CARDIOBLAST_DIFFERENTIATION	17	-0.603973	-1.95786	0.00105496	0.012269	0.00974851	1943	tags=41%, list=6%, signal=39%	MYOCD/PRICKLE1/TBX2/SRF/WNT3A/ISL1/NOTCH1
GOMF_NUCLEOTIDE_DIPHOSPHATASE_ACTIVITY	GOMF_NUCLEOTIDE_DIPHOSPHATASE_ACTIVITY	18	0.45009	2.0901	0.00106182	0.0123264	0.00979412	3557	tags=39%, list=11%, signal=35%	ENPP4/ENPP5/ENPP3/NUDT11/ITPA/NUDT2/ENPP1
GOBP_NEGATIVE_REGULATION_OF_PROTEASOMAL_UBIQUITIN_DEPENDENT_PROTEIN_CATABOLIC_PROCESS	GOBP_NEGATIVE_REGULATION_OF_PROTEASOMAL_UBIQUITIN_DEPENDENT_PROTEIN_CATABOLIC_PROCESS	31	0.357504	1.97668	0.0010721	0.0124231	0.00987101	3485	tags=35%, list=11%, signal=32%	SDCBP/UCHL5/PBK/SMARCC1/PARK7/EIF3H/HSP90AB1/MTM1/TAF9/DDRGK1/CAMLG
GOBP_PROTEIN_LOCALIZATION_TO_NUCLEOLUS	GOBP_PROTEIN_LOCALIZATION_TO_NUCLEOLUS	13	0.563247	2.23007	0.00107838	0.0124734	0.00991096	13717	tags=100%, list=44%, signal=56%	RAN/NMD3/RRS1/BYSL/MCRS1/RPF2/WRN/GLUL/TERT/NVL/POLR1A/NOL8/PINX1
GOBP_CAMP_METABOLIC_PROCESS	GOBP_CAMP_METABOLIC_PROCESS	22	-0.560421	-1.96949	0.00108084	0.0124793	0.00991565	2323	tags=36%, list=7%, signal=34%	ADCY5/EPHA2/PDE7A/ADCY3/PDE4A/PDE4C/ADCY4/PDE8B
GOBP_POSITIVE_REGULATION_OF_MITOCHONDRION_ORGANIZATION	GOBP_POSITIVE_REGULATION_OF_MITOCHONDRION_ORGANIZATION	76	0.240925	1.7146	0.00108463	0.0125006	0.00993252	2194	tags=25%, list=7%, signal=23%	BIK/YWHAQ/PDCD5/MMP9/FAM162A/TFDP1/MLLT11/CAMKK2/YWHAZ/HTRA2/BNIP3/MOAP1/BAD/YWHAG/PARK7/VDAC1/VPS35/DCN/FIS1
GOCC_PRP19_COMPLEX	GOCC_PRP19_COMPLEX	13	0.559004	2.21327	0.00109248	0.0125684	0.00998644	7750	tags=92%, list=25%, signal=70%	HSPA8/CRNKL1/CDC5L/PLRG1/U2AF2/SYF2/ISY1/XAB2/RBM22/CTNNBL1/BCAS2/PRPF19
GOBP_POSTREPLICATION_REPAIR	GOBP_POSTREPLICATION_REPAIR	47	0.303465	1.80275	0.0010984	0.0126139	0.0100226	3590	tags=38%, list=11%, signal=34%	RPA3/UBB/UBE2N/RFC4/POLDIP2/PCNA/TRIM25/MAD2L2/RPS27A/RPA1/NSMCE1/USP10/POLD2/VCP/RPA2/RFC3/UBE2V2/UBE2A
GOCC_NEURONAL_DENSE_CORE_VESICLE	GOCC_NEURONAL_DENSE_CORE_VESICLE	13	-0.63658	-1.90835	0.00110648	0.012684	0.0100783	604	tags=38%, list=2%, signal=38%	SCG2/NPY/CHGA/PENK/KIF1A
GOBP_NUCLEAR_PORE_ORGANIZATION	GOBP_NUCLEAR_PORE_ORGANIZATION	13	0.554365	2.1949	0.00112067	0.0128008	0.0101711	2918	tags=46%, list=9%, signal=42%	SEH1L/NUP54/RTN4/NUP205/NUP35/NUP153
GOMF_PSEUDOURIDINE_SYNTHASE_ACTIVITY	GOMF_PSEUDOURIDINE_SYNTHASE_ACTIVITY	13	0.552762	2.18856	0.00112067	0.0128008	0.0101711	14046	tags=100%, list=45%, signal=55%	DKC1/RPUSD1/PUS7/TRUB2/PUSL1/PUS7L/RPUSD2/PUS3/RPUSD4/RPUSD3/TRUB1/PUS10/PUS1
GOBP_LIPOPROTEIN_BIOSYNTHETIC_PROCESS	GOBP_LIPOPROTEIN_BIOSYNTHETIC_PROCESS	88	0.232925	1.70002	0.00113446	0.0129352	0.0102779	1572	tags=16%, list=5%, signal=15%	PIGK/GPAA1/PIGH/PIGP/DBI/APOE/PIGY/PIGB/PIGF/DPM1/RABL3/PIGC/DPM3/PIGM
GOBP_UBIQUITIN_DEPENDENT_PROTEIN_CATABOLIC_PROCESS_VIA_THE_MULTIVESICULAR_BODY_SORTING_PATHWAY	GOBP_UBIQUITIN_DEPENDENT_PROTEIN_CATABOLIC_PROCESS_VIA_THE_MULTIVESICULAR_BODY_SORTING_PATHWAY	20	0.435994	2.08375	0.0011435	0.0130152	0.0103414	11941	tags=90%, list=38%, signal=56%	TOM1L1/TSG101/VPS25/VPS4B/STAM/UBAP1/VPS28/VPS37C/RNF126/RNF115/VPS37A/SNF8/PLAA/NEDD4/VPS4A/PTPN23/VPS37B/VPS37D
GOMF_PHOSPHORIC_DIESTER_HYDROLASE_ACTIVITY	GOMF_PHOSPHORIC_DIESTER_HYDROLASE_ACTIVITY	85	-0.372589	-1.70078	0.00114693	0.0130311	0.010354	4234	tags=29%, list=13%, signal=26%	PLCG1/PLD1/GDPD2/PLCE1/GDPD1/PLCD4/GDPD4/TDP1/PDE5A/PDE2A/BDKRB2/PDE9A/PLCB4/PLCL2/PDE7A/CCL5/PLCXD1/GDPD5/ENPP6/PDE4A/PDE4C/CHRM1/EDNRA/PDE8B/PLCH2
GOBP_PROTEIN_TRANSMEMBRANE_IMPORT_INTO_INTRACELLULAR_ORGANELLE	GOBP_PROTEIN_TRANSMEMBRANE_IMPORT_INTO_INTRACELLULAR_ORGANELLE	32	0.363132	2.00605	0.00114985	0.0130411	0.010362	3855	tags=41%, list=12%, signal=36%	PEX7/DNAJC19/TOMM20/PEX10/TIMM23/ROMO1/GRPEL2/GRPEL1/HSPD1/PEX1/TOMM40/CHCHD4/AIFM1
GOMF_PHOSPHATIDYLINOSITOL_5_PHOSPHATE_BINDING	GOMF_PHOSPHATIDYLINOSITOL_5_PHOSPHATE_BINDING	16	-0.592206	-1.88238	0.00115844	0.0131153	0.010421	3091	tags=38%, list=10%, signal=34%	JPH2/PLEKHF1/OBSCN/PHLDA3/SH3PXD2B/SH3PXD2A
GOMF_S_ADENOSYLMETHIONINE_DEPENDENT_METHYLTRANSFERASE_ACTIVITY	GOMF_S_ADENOSYLMETHIONINE_DEPENDENT_METHYLTRANSFERASE_ACTIVITY	108	0.214762	1.74835	0.00116804	0.0132008	0.0104889	3354	tags=24%, list=11%, signal=22%	PRMT6/TFB2M/METTL5/TRMT112/RBBP5/DPH5/GNMT/PCMTD2/PRMT3/COQ5/LCMT1/SMYD3/THUMPD3/PRMT5/COMT/PRMT1/METTL6/FTSJ1/PRMT7/SETMAR/METTL3/METTL14/COQ3/TRMT5/PCMTD1/NSUN2
GOBP_NUCLEOTIDE_EXCISION_REPAIR_PREINCISION_COMPLEX_STABILIZATION	GOBP_NUCLEOTIDE_EXCISION_REPAIR_PREINCISION_COMPLEX_STABILIZATION	21	0.437025	2.13177	0.00117168	0.0132185	0.010503	11747	tags=90%, list=37%, signal=57%	RPA3/GTF2H5/RBX1/GTF2H3/RPA1/CHD1L/RPA2/ERCC1/CUL4A/CUL4B/ERCC3/GTF2H2/ERCC4/GTF2H1/PARP1/GTF2H4/DDB2/XPA/DDB1
GOMF_CYCLOSPORIN_A_BINDING	GOMF_CYCLOSPORIN_A_BINDING	16	0.483206	2.13883	0.00119489	0.0134567	0.0106922	3031	tags=50%, list=10%, signal=45%	PPP3CA/PPIAL4A/PPIA/PPIL1/PPIH/PPIC/PPP3R1/PPIE
GOCC_SAGA_TYPE_COMPLEX	GOCC_SAGA_TYPE_COMPLEX	23	0.408603	2.07265	0.00120325	0.0135017	0.010728	10588	tags=83%, list=34%, signal=55%	TAF7/ENY2/TAF2/TAF10/TAF12/TAF9/KAT2B/TADA2B/SUPT7L/TAF5L/SUPT3H/TAF4/TAF5/TADA3/TAF9B/TADA2A/USP22/ATXN7L3/TRRAP
GOCC_NUCLEAR_PORE_OUTER_RING	GOCC_NUCLEAR_PORE_OUTER_RING	10	0.626482	2.26873	0.00120433	0.0135017	0.010728	11731	tags=100%, list=37%, signal=63%	NUP37/SEH1L/SEC13/NUP160/NUP85/NUP107/NUP133/NUP98/AHCTF1/NUP43
GOBP_FATTY_ACID_DERIVATIVE_BIOSYNTHETIC_PROCESS	GOBP_FATTY_ACID_DERIVATIVE_BIOSYNTHETIC_PROCESS	57	0.269334	1.74763	0.0012052	0.0135017	0.010728	3452	tags=39%, list=11%, signal=34%	ELOVL5/ACSL1/HPGD/AACS/FASN/ACLY/ELOVL2/ACAT1/ACSL3/SLC25A1/HSD17B8/SLC27A5/CBR4/ALOX15B/HSD17B12/SCD/ALOX5AP/ELOVL6/PPT1/HMGCS2/ELOVL7/ELOVL1
GOBP_MAINTENANCE_OF_PROTEIN_LOCALIZATION_IN_ENDOPLASMIC_RETICULUM	GOBP_MAINTENANCE_OF_PROTEIN_LOCALIZATION_IN_ENDOPLASMIC_RETICULUM	14	0.523597	2.19738	0.0012173	0.0136133	0.0108167	3370	tags=43%, list=11%, signal=38%	KDELR2/GPAA1/KDELR3/OS9/INSIG2/RER1
GOBP_REGULATION_OF_NEURON_MIGRATION	GOBP_REGULATION_OF_NEURON_MIGRATION	34	-0.479977	-1.8577	0.0012238	0.0136622	0.0108556	2833	tags=32%, list=9%, signal=29%	FLRT2/SEMA3A/CAMK2B/TNN/FBXO31/GNRH1/NRG3/SEMA6A/ARHGEF2/CX3CL1/FLNA
GOBP_NEUROBLAST_DIVISION	GOBP_NEUROBLAST_DIVISION	13	-0.634306	-1.90153	0.00123794	0.0137961	0.0109619	1651	tags=38%, list=5%, signal=36%	NUMBL/TEAD3/WNT3A/ARHGEF2/AKNA
GOBP_REGULATION_OF_SUPRAMOLECULAR_FIBER_ORGANIZATION	GOBP_REGULATION_OF_SUPRAMOLECULAR_FIBER_ORGANIZATION	335	-0.270966	-1.42846	0.00124256	0.0138234	0.0109836	5190	tags=22%, list=17%, signal=19%	CLU/MECP2/HIP1R/KANK3/FER/MIR214/CDC42EP4/FCHSD1/SFRP1/SSH3/ARFIP2/AVIL/APOA1/BAG4/LIMK1/SPIRE1/EDN1/SPTBN2/RGS4/CCL26/HDAC6/SPTBN1/S100A10/TAOK1/SPTBN4/ELN/ARAP1/CORO2B/SORBS3/PFN4/PICK1/DLC1/SLC9A1/NUMA1/ARHGEF10/CGNL1/PPM1F/MIR21/TPM1/EVL/PAK1/AKAP13/SPTAN1/ASAP3/SVIL/BIN1/LPAR1/CLASP1/EFEMP2/DAPK3/SYNPO2/ARHGEF2/VILL/FES/SLIT2/FHOD3/SMAD3/CDC42EP5/ID1/MAP1A/KANK4/SHANK3/EMILIN1/FERMT2/RAPGEF3…
GOBP_REGULATION_OF_MUSCLE_HYPERTROPHY	GOBP_REGULATION_OF_MUSCLE_HYPERTROPHY	60	-0.409789	-1.76375	0.00126647	0.0140651	0.0111756	4780	tags=37%, list=15%, signal=31%	MIR214/NR4A3/TNFRSF1B/EDN1/RGS4/PDE9A/GATA5/RGS2/TNFRSF1A/LMCD1/SLC9A1/MIR21/IGFBP5/PAK1/LMNA/FOXO1/ERRFI1/SMAD3/NOTCH1/ATP2B4/PRKCA/PI16
GOBP_CELLULAR_RESPONSE_TO_EXTERNAL_STIMULUS	GOBP_CELLULAR_RESPONSE_TO_EXTERNAL_STIMULUS	276	-0.278353	-1.44473	0.00129778	0.0143878	0.0114321	2864	tags=18%, list=9%, signal=16%	PDE2A/ANKRD1/RPTOR/AXL/AQP2/BAG3/TNFRSF1A/ATP1A2/PICK1/SLC9A1/IRF1/TNRC6A/BRSK2/EIF2AK2/MYOCD/UCN2/TFEB/CNN2/SESN2/CD40/KANK2/TLR5/PIM1/BCL2/CARTPT/MAP3K14/ZC3H12A/SOX9/TNC/SRF/NR4A2/JUN/ATF3/PTN/DNAJC15/FES/TNFSF14/FOXO1/FOSL1/KCNB1/GSTP1/EIF2AK4/SIK1/BRSK1/FOS/LEP/PENK/FAM107A/PDK4
GOMF_ESTRADIOL_17_BETA_DEHYDROGENASE_ACTIVITY	GOMF_ESTRADIOL_17_BETA_DEHYDROGENASE_ACTIVITY	18	0.443787	2.06084	0.00132119	0.0146221	0.0116182	2740	tags=44%, list=9%, signal=41%	HSD17B6/HSD17B4/HSD17B11/HSD17B10/AKR1C3/HSD17B8/HSD17B1/HSD17B12
GOBP_POSITIVE_REGULATION_OF_TRANSLATION	GOBP_POSITIVE_REGULATION_OF_TRANSLATION	118	0.204839	1.7806	0.00132777	0.0146696	0.011656	3434	tags=27%, list=11%, signal=24%	METTL5/PRR16/NCK1/RPL26/CDC123/FASTKD2/RPS4X/CDK4/RPL30/EIF2S3/YTHDF3/DHX36/POLR2D/C1QBP/CNBP/RPS9/FASTKD3/EIF4G2/EIF4A3/YTHDF2/KHDRBS1/MRPS27/METTL3/VIM/POLR2G/METTL14/RMND1/NGRN/SOX4/PINK1/CIRBP/MPV17L2
GOBP_TERMINATION_OF_RNA_POLYMERASE_I_TRANSCRIPTION	GOBP_TERMINATION_OF_RNA_POLYMERASE_I_TRANSCRIPTION	27	0.37446	2.01406	0.00134	0.0147681	0.0117342	3392	tags=41%, list=11%, signal=36%	ZMPSTE24/GTF2H5/POLR2H/POLR2F/MNAT1/POLR2L/CCNH/GTF2H3/POLR1C/TAF1B/POLR2K
GOMF_HEPARIN_BINDING	GOMF_HEPARIN_BINDING	149	-0.321485	-1.58266	0.0013413	0.0147681	0.0117342	6349	tags=33%, list=20%, signal=26%	SERPINE2/PRG2/LTBP2/CFH/F11/LTF/PGF/PF4/RSPO1/CCL15/GREM2/CXCL13/RTN4RL1/ADAMTS15/SFRP1/DEFB106A/PCOLCE2/MPO/RSPO2/SLIT1/COLQ/SERPIND1/FGF2/FGF9/VEGFA/COL5A3/SLIT3/BMP7/ELANE/RSPO3/SERPINA5/SOD3/EFEMP2/THBS3/PTN/COL5A1/HBEGF/CEL/CLEC3B/COL13A1/FGFBP1/SLIT2/ADAMTS8/CRISPLD2/CTSG/ADAMTS1/PLA2G2D/SMOC1/TGFBR3
GOBP_ENDOPLASMIC_RETICULUM_ORGANIZATION	GOBP_ENDOPLASMIC_RETICULUM_ORGANIZATION	62	0.273597	1.76883	0.00135269	0.014846	0.0117961	3154	tags=31%, list=10%, signal=28%	TMED2/RAB18/REEP3/TRAM1/RAB10/TRAM2/ARL6IP1/EIF2AK3/ATL1/REEP6/ATL2/ATL3/TOR1B/LMAN1/RTN4/CCDC47/TMEM33/LPCAT3/BNIP1
GOBP_SENSORY_SYSTEM_DEVELOPMENT	GOBP_SENSORY_SYSTEM_DEVELOPMENT	355	-0.266861	-1.41427	0.001353	0.014846	0.0117961	6783	tags=28%, list=22%, signal=22%	PYGO2/TTLL5/TFAP2A/CRYBA2/CRYGC/TMOD1/MAB21L2/LRP5/FKBP8/ACVRL1/VAX2/NEUROD1/JMJD6/CRYBG3/JAG1/NEUROD4/CRYBA1/CRYBB3/RAX/SOX2/CRB1/ACHE/CABP4/GDF11/MIP/COL4A1/MEIS3/KRT12/OPN4/MFAP5/OBSL1/MEIS2/RP1/COL8A2/NF1/WNT2B/FOXC2/SPRY2/PPP1R13L/CRYGD/SMARCD3/NHS/STRA6/SEMA3A/RPE65/POU4F1/FGF2/FREM2/MEGF11/EPHA2/PRPH2/PBX4/CEP290/TCIRG1/VEGFA/RORB/BMP7/RBP4/SPRY1/BCL2/PBX2/CACNA1C/TBX2/LAMC3/MEIS1/GATA3/SO…
GOBP_DNA_DEPENDENT_DNA_REPLICATION	GOBP_DNA_DEPENDENT_DNA_REPLICATION	129	0.198755	1.66754	0.00136272	0.014927	0.0118605	3473	tags=26%, list=11%, signal=24%	DDX21/RPA3/ZMPSTE24/SSBP1/GMNN/RFC4/TIMELESS/POLE4/PCNA/PRIM2/POLE3/MCM4/GINS3/MCM2/EXD2/FEN1/PRIM1/TIPIN/CDT1/RPA1/RPAIN/CDK2AP1/SETMAR/DNAJA3/PNKP/POLD2/POLB/NBN/RPA2/MCM5/CCNE2/WRNIP1/RFC3/GINS2
GOCC_ENDOPLASMIC_RETICULUM_EXIT_SITE	GOCC_ENDOPLASMIC_RETICULUM_EXIT_SITE	27	0.372853	2.00541	0.00138829	0.0151576	0.0120437	579	tags=19%, list=2%, signal=18%	SEC23B/TMED5/PDCD6/SAR1B/SEC24D
GOMF_GLUCOSYLTRANSFERASE_ACTIVITY	GOMF_GLUCOSYLTRANSFERASE_ACTIVITY	13	0.543296	2.15108	0.0013885	0.0151576	0.0120437	14343	tags=100%, list=46%, signal=54%	ALG6/ALG5/GYG1/ALG10B/ALG8/ALG10/GBA/PLOD3/GBA2/GYG2/GYS2/GYS1/UGCG
GOBP_RESPONSE_TO_MINERALOCORTICOID	GOBP_RESPONSE_TO_MINERALOCORTICOID	30	-0.491107	-1.85528	0.00139962	0.015253	0.0121195	5006	tags=40%, list=16%, signal=34%	SCNN1B/NEFL/HSD3B1/HTR1B/EDN1/NPAS4/MAOB/FOSL1/SGK1/SCNN1G/FOS/FOSB
GOBP_DENSE_CORE_GRANULE_TRANSPORT	GOBP_DENSE_CORE_GRANULE_TRANSPORT	10	-0.679652	-1.87268	0.00143812	0.015646	0.0124318	6041	tags=50%, list=19%, signal=40%	KIF5A/PPFIA2/TRIM46/KIF1B/KIF1A
GOMF_PROTEIN_N_TERMINUS_BINDING	GOMF_PROTEIN_N_TERMINUS_BINDING	102	0.213849	1.72375	0.00144914	0.0157392	0.0125058	3198	tags=22%, list=10%, signal=19%	RPS21/SDCBP/TBL1XR1/MAP2K1/YWHAQ/VPS25/PPP1CC/HAX1/SMARCC1/PDCD10/CALM2/CSNK2A1/MNAT1/DCN/BANF1/PEX19/MORF4L1/GTF2H3/ALOX5AP/CALM3/NBN/RPA2
GOBP_SMOOTH_MUSCLE_CELL_DIFFERENTIATION	GOBP_SMOOTH_MUSCLE_CELL_DIFFERENTIATION	64	-0.393232	-1.71344	0.0014522	0.0157457	0.012511	5409	tags=36%, list=17%, signal=30%	PIAS1/MECP2/MIR221/MIR26A1/MIR34A/TBX18/SMARCD3/TBX3/FGF9/MIR100/VEGFA/MYOCD/NFATC4/MIR21/RAMP2/FOXO4/TBX2/SOX9/SRF/EFEMP2/NOTCH1/FOXF1/RBPMS2
GOCC_AZUROPHIL_GRANULE_MEMBRANE	GOCC_AZUROPHIL_GRANULE_MEMBRANE	54	0.276098	1.77126	0.00145943	0.015778	0.0125367	1924	tags=20%, list=6%, signal=19%	VAMP7/CPNE3/CMTM6/LAMP2/BRI3/TMEM179B/SURF4/DDOST/RAB5C/DNAJC5/MGST1
GOBP_SNO_S_RNA_3_END_PROCESSING	GOBP_SNO_S_RNA_3_END_PROCESSING	10	0.619661	2.24403	0.00146011	0.015778	0.0125367	2635	tags=40%, list=8%, signal=37%	EXOSC5/EXOSC4/EXOSC3/DKC1
GOMF_SIGNAL_SEQUENCE_BINDING	GOMF_SIGNAL_SEQUENCE_BINDING	43	0.320897	1.88774	0.00146412	0.0157915	0.0125474	2918	tags=28%, list=9%, signal=25%	KDELR2/PEX7/KDELR3/TOMM20/SRP54/CAT/SRP14/KPNA1/IPO4/PEX19/KPNB1/NUP153
GOBP_PTERIDINE_CONTAINING_COMPOUND_METABOLIC_PROCESS	GOBP_PTERIDINE_CONTAINING_COMPOUND_METABOLIC_PROCESS	31	0.348331	1.92596	0.00146628	0.0157915	0.0125474	3343	tags=39%, list=11%, signal=35%	PTS/PCBD1/QDPR/TYMS/FOLR2/MTHFS/MTHFD2/SHMT2/SLC46A1/GART/SLC19A1/MTHFD1
GOBP_ADHERENS_JUNCTION_ASSEMBLY	GOBP_ADHERENS_JUNCTION_ASSEMBLY	12	-0.639527	-1.86834	0.00147548	0.0158639	0.0126049	1648	tags=42%, list=5%, signal=39%	DLG5/RAMP2/VCL/JAM3/PIP5K1C
GOMF_OXIDOREDUCTASE_ACTIVITY_ACTING_ON_A_SULFUR_GROUP_OF_DONORS_NAD_P_AS_ACCEPTOR	GOMF_OXIDOREDUCTASE_ACTIVITY_ACTING_ON_A_SULFUR_GROUP_OF_DONORS_NAD_P_AS_ACCEPTOR	10	0.617058	2.2346	0.00148142	0.0159011	0.0126345	1885	tags=50%, list=6%, signal=47%	PRDX3/TXN/TXNDC17/DLD/PGK1
GOBP_MULTI_ORGANISM_LOCALIZATION	GOBP_MULTI_ORGANISM_LOCALIZATION	60	0.264787	1.69756	0.00148639	0.0159022	0.0126354	3757	tags=35%, list=12%, signal=31%	RAN/UBB/TSG101/NUP37/DYNLT1/SEH1L/SEC13/KPNA1/NUP54/KPNB1/XPO1/RPS27A/NUP205/NUP35/NUP62/NUP88/NUP153/NUP160/UBAP1/NUP85/VPS28
GOMF_UBIQUITIN_LIKE_PROTEIN_BINDING	GOMF_UBIQUITIN_LIKE_PROTEIN_BINDING	91	0.216884	1.60606	0.00148649	0.0159022	0.0126354	2838	tags=20%, list=9%, signal=18%	TOP2A/CKS1B/TOM1L1/CKS2/UCHL3/DCUN1D5/TSG101/UBE2N/TRIM32/RAD23B/CBX4/RNFT1/SMARCAD1/UBXN2B/RNF4/WDR92/UBA2/NUP62
GOBP_POSITIVE_REGULATION_OF_CELL_SUBSTRATE_ADHESION	GOBP_POSITIVE_REGULATION_OF_CELL_SUBSTRATE_ADHESION	115	-0.338903	-1.62038	0.00149832	0.0160021	0.0127147	5462	tags=26%, list=17%, signal=22%	VIT/CCR7/DNM2/SFRP1/EPB41L5/APOA1/UNC13D/FGB/S100A10/EGFLAM/FERMT1/RRAS/VEGFA/PPM1F/CEACAM6/EFEMP2/FBLN2/PTN/ITGA3/SMAD3/EMILIN1/FOXF1/FERMT2/CCL21/CX3CL1/OLFM4/COL16A1/LIMS2/ITGA5/FLNA
GOBP_CARDIOCYTE_DIFFERENTIATION	GOBP_CARDIOCYTE_DIFFERENTIATION	133	-0.322159	-1.56701	0.00151388	0.0161413	0.0128253	3318	tags=23%, list=11%, signal=21%	EDN1/RGS4/TBX18/LRRC10/TBX3/RGS2/FHL2/SLC9A1/DKK1/VEGFA/MYOCD/MIR21/BMP7/SPRY1/PRICKLE1/TBX2/PAK1/AKAP13/KDM6B/SRF/DLL1/WNT3A/FHOD3/ISL1/NOTCH1/ACTC1/HNRNPU/SIK1/PI16/TGFBR3/MYH11
GOMF_ENDONUCLEASE_ACTIVITY_ACTIVE_WITH_EITHER_RIBO_OR_DEOXYRIBONUCLEIC_ACIDS_AND_PRODUCING_5_PHOSPHOMONOESTERS	GOMF_ENDONUCLEASE_ACTIVITY_ACTIVE_WITH_EITHER_RIBO_OR_DEOXYRIBONUCLEIC_ACIDS_AND_PRODUCING_5_PHOSPHOMONOESTERS	31	0.346329	1.91489	0.00151728	0.0161467	0.0128296	3069	tags=29%, list=10%, signal=26%	APEX1/POP7/RPP40/TATDN1/RNASEH2A/POP4/FEN1/RPP21/DBR1
GOMF_EXTRACELLULAR_MATRIX_BINDING	GOMF_EXTRACELLULAR_MATRIX_BINDING	51	-0.421864	-1.77103	0.00151942	0.0161467	0.0128296	3229	tags=29%, list=10%, signal=26%	ITGA2B/ELN/LRRC15/VEGFA/AGRN/NTN4/ITGA9/FBLN2/ITGA3/ECM1/SLIT2/GPC1/OLFML2A/CD248/SMOC1
GOBP_EXTRACELLULAR_VESICLE_BIOGENESIS	GOBP_EXTRACELLULAR_VESICLE_BIOGENESIS	21	0.425627	2.07617	0.00152225	0.01615	0.0128322	3241	tags=43%, list=10%, signal=38%	SDCBP/COPS5/TSG101/VPS4B/STAM/CHMP2A/RAB11A/ARRDC4/ARRDC1
GOBP_DEOXYRIBONUCLEOSIDE_TRIPHOSPHATE_METABOLIC_PROCESS	GOBP_DEOXYRIBONUCLEOSIDE_TRIPHOSPHATE_METABOLIC_PROCESS	14	0.514285	2.1583	0.00153433	0.0162512	0.0129127	2225	tags=36%, list=7%, signal=33%	DCTPP1/TBPL1/TYMS/DUT/ITPA
GOBP_POSITIVE_REGULATION_OF_PROTEIN_EXIT_FROM_ENDOPLASMIC_RETICULUM	GOBP_POSITIVE_REGULATION_OF_PROTEIN_EXIT_FROM_ENDOPLASMIC_RETICULUM	13	0.535289	2.11937	0.00154412	0.0163177	0.0129655	2245	tags=31%, list=7%, signal=29%	EDEM1/SAR1B/EDEM2/TMEM30B
GOBP_TOXIN_TRANSPORT	GOBP_TOXIN_TRANSPORT	38	0.323498	1.90888	0.0015457	0.0163177	0.0129655	3070	tags=39%, list=10%, signal=36%	CCT2/COPB2/CCT8/TCP1/CCT7/MTMR12/BNIP3/ADAM10/TRIP4/DNAJA1/CCT5/CCT3/CCT4/CCT6B/ABCG1
GOCC_CORTICAL_CYTOSKELETON	GOCC_CORTICAL_CYTOSKELETON	98	-0.351318	-1.64071	0.00155122	0.0163286	0.0129742	8090	tags=37%, list=26%, signal=27%	TRPV4/SPTBN5/ERC1/SPTA1/LLGL2/MYADM/EPB41L2/TMOD1/PLEKHH2/PRKCB/LLGL1/FCHSD1/CDH2/RIMS2/PCLO/KRT19/SPTBN2/SPTBN1/PJVK/SELE/SPTBN4/DLC1/NUMA1/DCDC2B/AKAP13/SPTAN1/CALD1/RIMS3/CLASP1/SHROOM1/DLG4/RAPGEF3/CLDN5/CIB2/SHROOM4/FLNA
GOMF_BASIC_AMINO_ACID_TRANSMEMBRANE_TRANSPORTER_ACTIVITY	GOMF_BASIC_AMINO_ACID_TRANSMEMBRANE_TRANSPORTER_ACTIVITY	15	-0.610953	-1.91603	0.00155183	0.0163286	0.0129742	1569	tags=33%, list=5%, signal=32%	SLC38A5/SLC25A29/SLC47A1/SLC38A7/SLC7A4
GOBP_REGULATION_OF_EXTRACELLULAR_MATRIX_ASSEMBLY	GOBP_REGULATION_OF_EXTRACELLULAR_MATRIX_ASSEMBLY	15	-0.610255	-1.91384	0.00157353	0.0165298	0.0131341	1297	tags=40%, list=4%, signal=38%	SOX9/CLASP1/SMAD3/NOTCH1/EMILIN1/PHLDB1
GOCC_SPLICEOSOMAL_TRI_SNRNP_COMPLEX	GOCC_SPLICEOSOMAL_TRI_SNRNP_COMPLEX	34	0.341477	1.9442	0.00159765	0.0167557	0.0133135	3104	tags=41%, list=10%, signal=37%	SNRPN/LSM3/SNRPF/PPIH/LSM7/SNRPB/LSM4/LSM5/SNRPG/PRPF6/PRPF18/LSM8/LSM2/ZMAT2
GOBP_RESPONSE_TO_ORGANOPHOSPHORUS	GOBP_RESPONSE_TO_ORGANOPHOSPHORUS	128	-0.333797	-1.61548	0.00161326	0.016881	0.013413	2864	tags=20%, list=9%, signal=19%	PDE2A/P2RX6/OXT/CARM1/P2RX2/IGFBP5/P2RY11/PER1/P2RX1/ALDH3A1/LPAR1/DUOX1/CFTR/JUN/DUSP1/AHR/ADIPOQ/EEF2K/FOSL1/STC1/PNPT1/RAPGEF3/CIB2/FOS/PENK/FOSB
GOBP_GLYCOSIDE_METABOLIC_PROCESS	GOBP_GLYCOSIDE_METABOLIC_PROCESS	20	0.426232	2.0371	0.00161486	0.016881	0.013413	3717	tags=50%, list=12%, signal=44%	AKR1C3/GLA/AKR1A1/GUSB/FUCA1/FUCA2/CBR4/AKR7A2/NAGA/ABHD10
GOBP_RESPONSE_TO_ISCHEMIA	GOBP_RESPONSE_TO_ISCHEMIA	46	-0.427479	-1.75949	0.00164072	0.0171234	0.0136057	2642	tags=22%, list=8%, signal=20%	GPR151/PER2/P2RX2/BCL2/CAV1/EEF2K/EGR1/PPARGC1A/CX3CL1/FAIM2
GOBP_WOUND_HEALING_SPREADING_OF_EPIDERMAL_CELLS	GOBP_WOUND_HEALING_SPREADING_OF_EPIDERMAL_CELLS	16	-0.581498	-1.84834	0.00165645	0.0172395	0.013698	2243	tags=44%, list=7%, signal=41%	FERMT1/ADAM17/CLASP1/COL5A1/HBEGF/FERMT2/ITGA5
GOMF_FATTY_ACID_SYNTHASE_ACTIVITY	GOMF_FATTY_ACID_SYNTHASE_ACTIVITY	11	0.579906	2.16244	0.00165766	0.0172395	0.013698	3452	tags=73%, list=11%, signal=65%	ELOVL5/OXSM/FASN/ELOVL2/MCAT/ELOVL6/ELOVL7/ELOVL1
GOBP_NEGATIVE_REGULATION_OF_CHROMOSOME_ORGANIZATION	GOBP_NEGATIVE_REGULATION_OF_CHROMOSOME_ORGANIZATION	78	0.238484	1.70397	0.00165992	0.0172395	0.013698	3302	tags=26%, list=11%, signal=23%	TOP2A/PTTG3P/CDC20/PTTG1/PSMG2/TINF2/LCMT1/BUB1/AURKB/MAD2L1BP/MNAT1/HNRNPA1/MCM2/MAD2L2/CDT1/SETMAR/MAD2L1/NBN/ERCC1/TRIP13
GOBP_RRNA_METHYLATION	GOBP_RRNA_METHYLATION	14	0.512066	2.14898	0.00167255	0.0173426	0.0137798	217	tags=21%, list=1%, signal=21%	TFB2M/METTL5/TRMT112
GOBP_MEMBRANE_FISSION	GOBP_MEMBRANE_FISSION	14	-0.609196	-1.85728	0.00168415	0.0174347	0.013853	6421	tags=50%, list=20%, signal=40%	DNM1/DNM2/DNM3/CORO1C/MX2/SH3GL2/MX1
GOCC_CLATHRIN_COATED_ENDOCYTIC_VESICLE	GOCC_CLATHRIN_COATED_ENDOCYTIC_VESICLE	56	0.269108	1.72701	0.00169379	0.0175061	0.0139098	1501	tags=21%, list=5%, signal=20%	HLA-DRB1/HLA-DRB5/HLA-DQA1/WNT5A/APOE/CD9/HLA-DRA/MYO6/FZD4/AP2S1/CLTC/HLA-DPA1
GOBP_PRIMARY_MIRNA_PROCESSING	GOBP_PRIMARY_MIRNA_PROCESSING	11	-0.656967	-1.85685	0.00169899	0.0175316	0.01393	1816	tags=36%, list=6%, signal=34%	DGCR8/SMAD3/HNRNPA2B1/IL6
GOBP_REGULATION_OF_MITOTIC_NUCLEAR_DIVISION	GOBP_REGULATION_OF_MITOTIC_NUCLEAR_DIVISION	103	0.208857	1.68907	0.00170201	0.0175345	0.0139323	3302	tags=25%, list=11%, signal=23%	CDC20/TOM1L1/PDXP/NUSAP1/AURKA/NSMCE2/CDC25C/PSMG2/HOXA13/LCMT1/BUB1/ANAPC7/AURKB/MAD2L1BP/DLGAP5/PRMT5/MAD2L2/ANAPC5/RB1/CDC42/CDT1/NUP62/MAD2L1/EGF/CHEK1/TRIP13
GOBP_HISTONE_H2A_ACETYLATION	GOBP_HISTONE_H2A_ACETYLATION	15	0.505102	2.13916	0.0017143	0.0176327	0.0140104	2527	tags=40%, list=8%, signal=37%	MORF4L2/ACTL6A/YEATS4/RUVBL1/RUVBL2/MORF4L1
GOBP_ANATOMICAL_STRUCTURE_MATURATION	GOBP_ANATOMICAL_STRUCTURE_MATURATION	200	-0.297513	-1.50026	0.0017448	0.0179178	0.0142368	3250	tags=20%, list=10%, signal=18%	TCP11/CCL19/CNTN2/SPINK5/CEND1/BCL11A/SPTBN4/PCSK4/AXL/FERMT1/LGI4/PICK1/VEGFA/TMEM79/CDC25B/AGRN/NPR2/BCL2/PTH1R/GATA3/CDH3/NTN4/CFTR/NR4A2/THBS3/CATSPER2/ALDH1A2/SEMG2/KLF2/REC8/PLXNB1/DEFB1/CCL21/DCHS1/DMC1/CX3CL1/TFCP2L1/SEMG1/PABPC1L/LEP
GOCC_ENDOPLASMIC_RETICULUM_TUBULAR_NETWORK	GOCC_ENDOPLASMIC_RETICULUM_TUBULAR_NETWORK	21	0.421917	2.05807	0.00176212	0.0180666	0.0143551	3331	tags=52%, list=11%, signal=47%	RAB18/REEP3/ARV1/RAB10/ATL1/ATL2/ATL3/RTN4/KPNB1/STIM1/RNF41
GOBP_PENTOSE_METABOLIC_PROCESS	GOBP_PENTOSE_METABOLIC_PROCESS	13	0.529803	2.09766	0.00177077	0.0181264	0.0144026	4242	tags=62%, list=14%, signal=53%	PGD/NUDT5/RBKS/FGGY/RPE/TKT/DHDH/TALDO1
GOBP_GLYCOLIPID_BIOSYNTHETIC_PROCESS	GOBP_GLYCOLIPID_BIOSYNTHETIC_PROCESS	62	0.269587	1.7429	0.00182318	0.018633	0.0148052	2927	tags=26%, list=9%, signal=23%	PIGK/GPAA1/PIGH/PIGP/PIGY/PIGB/PIGF/DPM1/PIGC/DPM3/PIGM/PIGW/PIGT/B4GALT3/PIGO/PIGG
GOBP_AROMATIC_AMINO_ACID_TRANSPORT	GOBP_AROMATIC_AMINO_ACID_TRANSPORT	13	-0.623374	-1.86876	0.00182951	0.018668	0.014833	3353	tags=46%, list=11%, signal=41%	SLC36A4/SLC16A10/SLC38A5/SLC25A29/SLC7A5/SLC38A7
GOBP_NEGATIVE_REGULATION_OF_PROTEIN_ACETYLATION	GOBP_NEGATIVE_REGULATION_OF_PROTEIN_ACETYLATION	23	0.393216	1.9946	0.00186845	0.019035	0.0151246	19056	tags=100%, list=61%, signal=39%	TAF7/SET/HINT2/SNCA/PARK7/SIRT1/PIH1D1/HDAC2/CTBP1/SDR16C5/KLF15/SIN3A/NOC2L/TWIST1/THAP7/MAGEA2B/SPI1/FOXP3/BRCA1/GSK3B/ATG5/MAGEA2/ZNF451
GOBP_NADP_METABOLIC_PROCESS	GOBP_NADP_METABOLIC_PROCESS	31	0.339302	1.87604	0.00187428	0.0190641	0.0151477	4242	tags=45%, list=14%, signal=39%	IDH1/PGAM1/PGD/ME2/FMO5/PGM2/PGLS/RBKS/RPE/TKT/SHPK/NQO1/ME1/TALDO1
GOCC_ACTIN_FILAMENT	GOCC_ACTIN_FILAMENT	105	-0.348597	-1.64673	0.00187816	0.0190733	0.015155	2127	tags=18%, list=7%, signal=17%	PDLIM7/GJB6/PDLIM4/TPM1/PALLD/PAK1/DAPK3/TPM2/DPYSL3/JAM3/ACTC1/ACTN1/MYO9B/ACTA1/SMTN/EHBP1L1/LMOD1/SHROOM4/FLNA
GOBP_REGULATION_OF_RESPONSE_TO_ENDOPLASMIC_RETICULUM_STRESS	GOBP_REGULATION_OF_RESPONSE_TO_ENDOPLASMIC_RETICULUM_STRESS	73	0.230864	1.5909	0.00188737	0.0191365	0.0152052	3207	tags=23%, list=10%, signal=21%	XBP1/TMED2/NCK1/AQP11/AGR2/COPS5/ERP29/DNAJB9/RNFT1/PARK7/EIF2AK3/UBQLN1/TMEM33/LPCAT3/DDRGK1/SIRT1/UBQLN2
GOBP_DNA_TEMPLATED_TRANSCRIPTION_ELONGATION	GOBP_DNA_TEMPLATED_TRANSCRIPTION_ELONGATION	95	0.218348	1.6465	0.00190253	0.0192598	0.0153032	3392	tags=28%, list=11%, signal=25%	EAPP/ENY2/HMGN1/GTF2H5/WDR61/POLR2B/POLR2D/POLR2H/ELL2/LEO1/POLR2F/SUPT4H1/MNAT1/POLR2L/EAF1/CCNH/AFF4/GTF2H3/POLR1C/POLR2I/ELP4/POLR2G/TCEA1/TAF1B/NCBP2/ELL3/POLR2K
GOBP_BRANCHING_MORPHOGENESIS_OF_AN_EPITHELIAL_TUBE	GOBP_BRANCHING_MORPHOGENESIS_OF_AN_EPITHELIAL_TUBE	143	-0.321302	-1.57065	0.00192465	0.0194529	0.0154566	3809	tags=24%, list=12%, signal=21%	RSPO2/SMO/LAMA5/WNT2B/CELSR1/FOXC2/EDN1/SPRY2/SIX2/TBX3/FGF2/NOTCH4/EPHA2/VEGFA/NFATC4/DLG5/BMP7/SPRY1/BCL2/PAK1/SOX9/TNC/RASIP1/SRF/GLI3/SLIT2/NOTCH1/EDNRA/SEMA3E/FOXF1/DCHS1/PKD1/HOXD11/LRP5L
GOBP_MAINTENANCE_OF_PROTEIN_LOCATION_IN_CELL	GOBP_MAINTENANCE_OF_PROTEIN_LOCATION_IN_CELL	61	0.261207	1.67235	0.00195948	0.0197683	0.0157072	3424	tags=26%, list=11%, signal=23%	KDELR2/GPAA1/TXN/GOLPH3/TMSB15A/KDELR3/SRGN/TMSB10/PARK7/TSPO/OS9/MORC3/CDK5/INSIG2/RER1/PINK1
GOBP_DIGESTIVE_SYSTEM_DEVELOPMENT	GOBP_DIGESTIVE_SYSTEM_DEVELOPMENT	126	-0.329267	-1.59501	0.00196202	0.0197683	0.0157072	4623	tags=25%, list=15%, signal=22%	SFRP1/EPB41L5/ALX4/SOX17/SMO/PYY/SIX2/STRA6/CCDC40/GATA5/HOXD13/MYOCD/KLF5/BCL2/TBX2/PCSK5/CHD8/GLI3/ALDH1A2/RARRES2/FOXF2/SMAD3/NOTCH1/NPY/NPHP3/FOXF1/DCHS1/PKD1/TGFB3/AHI1/RBPMS2/TP63
GOMF_SULFUR_COMPOUND_BINDING	GOMF_SULFUR_COMPOUND_BINDING	235	-0.289931	-1.48111	0.0019814	0.0199322	0.0158374	6349	tags=29%, list=20%, signal=24%	SERPINE2/PRG2/LTBP2/PNPLA3/CFH/F11/SULT1C3/LTF/ANXA6/PGF/PF4/RSPO1/CHST15/CCL15/GREM2/CXCL13/RTN4RL1/ADAMTS15/SFRP1/DEFB106A/PCOLCE2/MPO/RSPO2/PTGES/SLIT1/COLQ/SERPIND1/GSTM1/ACBD4/ACOT11/TKTL1/FGF2/FGF9/LRP1/SULT1A4/VEGFA/COL5A3/SLIT3/SULT1A1/AGRN/BMP7/ELANE/RSPO3/SERPINA5/SOD3/EFEMP2/THBS3/PTN/COL5A1/HBEGF/CEL/CLEC3B/COL13A1/FGFBP1/DPYSL3/SLIT2/ADAMTS8/CRISPLD2/CTSG/GSTP1/ADAMTS1/FST/PLA2G2D/CH…
GOBP_TRABECULA_MORPHOGENESIS	GOBP_TRABECULA_MORPHOGENESIS	42	-0.441582	-1.7869	0.00198545	0.0199416	0.015845	2213	tags=26%, list=7%, signal=24%	FHL2/BMP7/RBP4/SRF/THBS3/FBN2/SBNO2/NOTCH1/ADAMTS1/PLXNB1/TGFBR3
GOBP_TRANSLESION_SYNTHESIS	GOBP_TRANSLESION_SYNTHESIS	37	0.323083	1.78515	0.00199206	0.019968	0.0158659	3393	tags=38%, list=11%, signal=34%	RPA3/UBB/RFC4/POLDIP2/PCNA/TRIM25/MAD2L2/RPS27A/RPA1/USP10/POLD2/VCP/RPA2/RFC3
GOBP_DNA_REPLICATION_INDEPENDENT_NUCLEOSOME_ORGANIZATION	GOBP_DNA_REPLICATION_INDEPENDENT_NUCLEOSOME_ORGANIZATION	30	0.367145	2.01041	0.00199563	0.019968	0.0158659	2593	tags=40%, list=8%, signal=37%	ITGB3BP/HJURP/HAT1/CENPM/RUVBL1/ASF1A/CENPN/CENPA/IPO4/ASF1B/OIP5/RBBP7
GOBP_ALPHA_LINOLENIC_ACID_METABOLIC_PROCESS	GOBP_ALPHA_LINOLENIC_ACID_METABOLIC_PROCESS	13	0.528135	2.09105	0.00199743	0.019968	0.0158659	1173	tags=38%, list=4%, signal=37%	ELOVL5/HSD17B4/ACSL1/ACOT8/ELOVL2
GOBP_VIRAL_RELEASE_FROM_HOST_CELL	GOBP_VIRAL_RELEASE_FROM_HOST_CELL	32	0.350257	1.93493	0.00200661	0.0200285	0.015914	2722	tags=31%, list=9%, signal=29%	CHMP2B/CHMP4C/PPIA/CHMP3/TSG101/TRIM32/VPS4B/TRIM25/TRIM28/CHMP2A
GOBP_MAINTENANCE_OF_BLOOD_BRAIN_BARRIER	GOBP_MAINTENANCE_OF_BLOOD_BRAIN_BARRIER	32	-0.484868	-1.85416	0.0020129	0.0200355	0.0159196	2122	tags=25%, list=7%, signal=23%	GJB6/VEGFA/VCL/ANGPT1/SH3GL2/JAM3/CLDN5/IL6
GOBP_REACTIVE_OXYGEN_SPECIES_METABOLIC_PROCESS	GOBP_REACTIVE_OXYGEN_SPECIES_METABOLIC_PROCESS	259	-0.281186	-1.44878	0.00201642	0.0200355	0.0159196	1845	tags=14%, list=6%, signal=14%	HBD/SESN2/MIR21/SLC5A3/NOXA1/BMP7/FBLN5/BCL2/H19/ZC3H12A/DDIT4/SFTPD/MAOB/DUOX1/SOD3/ABCD1/CAV1/PON3/SMAD3/KLF2/HBA2/GSTP1/ATP2B4/DUOXA1/IL10/CFLAR/SH3PXD2B/SH3PXD2A/GPX3/CRYAB/PLIN5/LEP/CD177/PAGE4/PTGIS/PDK4/TMEM106A
GOBP_REGULATION_OF_MITOTIC_SISTER_CHROMATID_SEGREGATION	GOBP_REGULATION_OF_MITOTIC_SISTER_CHROMATID_SEGREGATION	43	0.310683	1.82766	0.00201952	0.0200355	0.0159196	2938	tags=28%, list=9%, signal=25%	PTTG3P/CDC20/PTTG1/PSMG2/BECN1/LCMT1/BUB1/AURKB/MAD2L1BP/MAD2L2/CDT1/MAD2L1
GOMF_GLYCOSAMINOGLYCAN_BINDING	GOMF_GLYCOSAMINOGLYCAN_BINDING	206	-0.299595	-1.51513	0.00202045	0.0200355	0.0159196	6349	tags=31%, list=20%, signal=25%	SERPINE2/PRG2/LTBP2/CFH/F11/LTF/ANXA6/PGF/PF4/VIT/RSPO1/CCL15/GREM2/CXCL13/PGLYRP3/RTN4RL1/HAPLN3/HAPLN2/ADAMTS15/SFRP1/LAYN/DEFB106A/PCOLCE2/MPO/RSPO2/SLIT1/COLQ/SERPIND1/EGFLAM/FGF2/SULF2/FGF9/SPOCK3/VEGFA/COL5A3/SLIT3/AGRN/BMP7/LYVE1/STAB1/ELANE/RSPO3/SERPINA5/SOD3/EFEMP2/THBS3/PTN/COL5A1/HBEGF/CEL/CLEC3B/COL13A1/FGFBP1/DPYSL3/SLIT2/ADAMTS8/CRISPLD2/CTSG/ADAMTS1/PLA2G2D/LTBP4/SMOC1/TGFBR3
GOBP_PEROXISOME_PROLIFERATOR_ACTIVATED_RECEPTOR_SIGNALING_PATHWAY	GOBP_PEROXISOME_PROLIFERATOR_ACTIVATED_RECEPTOR_SIGNALING_PATHWAY	21	-0.530009	-1.8331	0.00202294	0.0200355	0.0159196	4227	tags=33%, list=13%, signal=29%	MIR34A/LMO3/RXRA/ACTN4/PLIN5/LEP/PTGIS
GOCC_OLIGOSACCHARYLTRANSFERASE_COMPLEX	GOCC_OLIGOSACCHARYLTRANSFERASE_COMPLEX	11	0.572564	2.13506	0.00203386	0.0201126	0.0159808	1483	tags=55%, list=5%, signal=52%	OSTC/STT3B/DAD1/TUSC3/DDOST/STT3A
GOBP_CENTROMERE_COMPLEX_ASSEMBLY	GOBP_CENTROMERE_COMPLEX_ASSEMBLY	31	0.336779	1.86209	0.00205278	0.0202685	0.0161046	2593	tags=35%, list=8%, signal=33%	ITGB3BP/HJURP/CENPM/RUVBL1/CENPN/DLGAP5/CENPA/RB1/OIP5/RNF4/RBBP7
GOBP_GLIAL_CELL_PROLIFERATION	GOBP_GLIAL_CELL_PROLIFERATION	45	-0.42987	-1.76223	0.00205753	0.0202841	0.016117	2228	tags=24%, list=7%, signal=23%	RNF10/LGI4/CREB1/ETV5/PTN/CHRM1/NOTCH1/CX3CL1/ASCL2/IL6/PENK
GOBP_NEPHRON_DEVELOPMENT	GOBP_NEPHRON_DEVELOPMENT	138	-0.320779	-1.56107	0.00207413	0.0203864	0.0161984	4740	tags=25%, list=15%, signal=21%	KLHL3/IRX3/COL4A4/IL6R/SMO/LAMA5/WNT2B/PLCE1/FOXC2/SIX2/FGF2/SULF2/VEGFA/BMP7/BCL2/GATA3/SOX9/ANGPT1/DLL1/GLI3/OSR1/ITGA3/ADIPOQ/NOTCH1/EGR1/FOXC1/CFLAR/DCHS1/PKD1/WNK4/AHI1/HOXD11/LAMB2/PROM1
GOBP_RNA_PHOSPHODIESTER_BOND_HYDROLYSIS_ENDONUCLEOLYTIC	GOBP_RNA_PHOSPHODIESTER_BOND_HYDROLYSIS_ENDONUCLEOLYTIC	68	0.244002	1.66142	0.00207428	0.0203864	0.0161984	3146	tags=25%, list=10%, signal=23%	RPS21/LACTB2/APEX1/POP7/RPP40/RNASEH2A/NUDT16L1/RRS1/TSNAX/POP4/RCL1/FEN1/CPSF3/RPP21/RNASEK/DBR1/TSEN34
GOBP_CARDIAC_CELL_DEVELOPMENT	GOBP_CARDIAC_CELL_DEVELOPMENT	79	-0.366064	-1.65196	0.00207872	0.0203988	0.0162082	3318	tags=27%, list=11%, signal=24%	EDN1/RGS4/TBX18/LRRC10/TBX3/RGS2/FHL2/VEGFA/MIR21/SPRY1/PAK1/AKAP13/SRF/FHOD3/ISL1/NOTCH1/ACTC1/HNRNPU/PI16/TGFBR3/MYH11
GOBP_S_ADENOSYLMETHIONINE_METABOLIC_PROCESS	GOBP_S_ADENOSYLMETHIONINE_METABOLIC_PROCESS	14	0.502568	2.10913	0.00208723	0.020451	0.0162497	605	tags=29%, list=2%, signal=28%	ENOPH1/APIP/GNMT/AHCY
GOBP_REGULATION_OF_VACUOLE_ORGANIZATION	GOBP_REGULATION_OF_VACUOLE_ORGANIZATION	44	0.308605	1.81189	0.00209347	0.0204808	0.0162734	3424	tags=36%, list=11%, signal=32%	RAB5A/BECN1/SH3GLB1/IFT20/GRN/TMEM39A/MTM1/SEC22B/PIP4K2A/RALB/TBC1D14/ENO1/PIP4K2C/SCARB2/UBQLN2/PINK1
GOBP_AMINO_SUGAR_BIOSYNTHETIC_PROCESS	GOBP_AMINO_SUGAR_BIOSYNTHETIC_PROCESS	13	0.527119	2.08703	0.00211075	0.0205948	0.016364	3158	tags=54%, list=10%, signal=48%	GFPT1/PGM3/GNE/UAP1/GNPDA1/GNPDA2/GNPNAT1
GOBP_HISTONE_MRNA_METABOLIC_PROCESS	GOBP_HISTONE_MRNA_METABOLIC_PROCESS	22	0.403907	2.02877	0.00211522	0.0205948	0.016364	3187	tags=41%, list=10%, signal=37%	SNRPF/EXOSC4/SLBP/SNRPB/SNRPG/CPSF2/CPSF3/LSM10/NCBP2
GOCC_POSTSYNAPTIC_ENDOCYTIC_ZONE	GOCC_POSTSYNAPTIC_ENDOCYTIC_ZONE	10	-0.667538	-1.8393	0.00211625	0.0205948	0.016364	6421	tags=70%, list=20%, signal=56%	DNM1/DNM2/CALY/DNM3/GRIA2/MX2/MX1
GOBP_DNA_GEOMETRIC_CHANGE	GOBP_DNA_GEOMETRIC_CHANGE	107	0.203585	1.66897	0.00211798	0.0205948	0.016364	3393	tags=27%, list=11%, signal=24%	TOP2A/G3BP1/UBB/SSBP1/GTF2H5/RBX1/SMARCA1/XRCC5/RFC4/RAD23B/RUVBL1/HMGB3/DHX36/MCM4/SMARCAD1/MNAT1/RUVBL2/MCM2/CETN2/GTF2H3/RPS27A/RPA1/DDX1/CHD1L/NBN/MCM5/CUL4A/WRNIP1/RFC3
GOBP_NUCLEAR_TRANSCRIBED_MRNA_CATABOLIC_PROCESS_EXONUCLEOLYTIC_3_5	GOBP_NUCLEAR_TRANSCRIBED_MRNA_CATABOLIC_PROCESS_EXONUCLEOLYTIC_3_5	11	0.570163	2.12611	0.00212791	0.02066	0.0164158	2273	tags=45%, list=7%, signal=42%	EXOSC5/EXOSC4/EXOSC3/TTC37/EXOSC9
GOMF_PEPTIDE_ANTIGEN_BINDING	GOMF_PEPTIDE_ANTIGEN_BINDING	25	0.377256	1.99289	0.00213294	0.0206655	0.0164201	2307	tags=24%, list=7%, signal=22%	HLA-DRB1/HLA-DRB5/HLA-DQA1/HLA-DRA/HLA-DPA1/HLA-DRB3
GOBP_NEGATIVE_REGULATION_OF_PROTEASOMAL_PROTEIN_CATABOLIC_PROCESS	GOBP_NEGATIVE_REGULATION_OF_PROTEASOMAL_PROTEIN_CATABOLIC_PROCESS	43	0.309659	1.82163	0.00213492	0.0206655	0.0164201	2521	tags=26%, list=8%, signal=24%	SDCBP/UCHL5/AQP11/PBK/GABARAPL2/SMARCC1/PARK7/EIF3H/HSP90AB1/MTM1/TAF9
GOBP_CHROMATIN_MEDIATED_MAINTENANCE_OF_TRANSCRIPTION	GOBP_CHROMATIN_MEDIATED_MAINTENANCE_OF_TRANSCRIPTION	12	-0.628349	-1.83569	0.00215127	0.0207753	0.0165073	2348	tags=33%, list=7%, signal=31%	PADI2/ZMIZ2/SERTAD1/PABPC1L
GOBP_RESPONSE_TO_PROSTAGLANDIN_E	GOBP_RESPONSE_TO_PROSTAGLANDIN_E	23	-0.521334	-1.84784	0.00215274	0.0207753	0.0165073	5404	tags=35%, list=17%, signal=29%	CCR7/SFRP1/AKAP8/CCL19/OXT/GNRH1/CCL21/TGFBR3
GOBP_NEUROMUSCULAR_JUNCTION_DEVELOPMENT	GOBP_NEUROMUSCULAR_JUNCTION_DEVELOPMENT	46	-0.421001	-1.73282	0.00216593	0.0208711	0.0165835	4475	tags=30%, list=14%, signal=26%	COL4A1/UNC13C/MUSK/PPFIBP2/PPFIBP1/P2RX2/AGRN/LRP4/TNC/COL4A5/PTN/FZD9/SHANK3/LAMB2
GOBP_RESPONSE_TO_CADMIUM_ION	GOBP_RESPONSE_TO_CADMIUM_ION	58	0.266193	1.69791	0.00217934	0.0209688	0.0166611	3435	tags=28%, list=11%, signal=25%	SORD/CYB5A/MMP9/AKR1C3/B2M/ATP7A/MAPK9/PCNA/CAT/SOD1/MT1B/UBE2D3/PPP5C/ERCC1/MT1M/MT1H
GOBP_NEGATIVE_REGULATION_OF_VIRAL_GENOME_REPLICATION	GOBP_NEGATIVE_REGULATION_OF_VIRAL_GENOME_REPLICATION	49	-0.42033	-1.75296	0.0021957	0.0210945	0.016761	6043	tags=37%, list=19%, signal=30%	SETDB1/LTF/PARP10/IFIT1/ISG15/MIR141/APOBEC3A/BTBD17/AICDA/APOBEC3D/MPHOSPH8/EIF2AK2/APOBEC3F/CCL5/IFITM1/APOBEC3C/BST2/MX1
GOMF_EXONUCLEASE_ACTIVITY_ACTIVE_WITH_EITHER_RIBO_OR_DEOXYRIBONUCLEIC_ACIDS_AND_PRODUCING_5_PHOSPHOMONOESTERS	GOMF_EXONUCLEASE_ACTIVITY_ACTIVE_WITH_EITHER_RIBO_OR_DEOXYRIBONUCLEIC_ACIDS_AND_PRODUCING_5_PHOSPHOMONOESTERS	52	0.276308	1.74637	0.00220651	0.0211228	0.0167835	2986	tags=29%, list=10%, signal=26%	EXOSC5/APEX1/TATDN1/EXOSC4/EXOSC3/CNOT7/CNOT8/APEX2/REXO2/EXD2/CNOT6/FEN1/EXOSC9/PDE12/XRN2
GOBP_REGULATION_OF_BLOOD_PRESSURE	GOBP_REGULATION_OF_BLOOD_PRESSURE	169	-0.308435	-1.5352	0.00220802	0.0211228	0.0167835	2449	tags=20%, list=8%, signal=18%	KLK1/CORO2B/OXT/ATP1A2/PTGS1/P2RX2/EDN2/NPR2/TPM1/HSD11B2/RAMP2/CARTPT/P2RX1/PCSK5/ANPEP/EDN3/DLL1/CYP4F12/ADIPOQ/CES1/RARRES2/SLC4A5/SMAD3/NPY/KLK2/CTSG/EDNRA/NISCH/SGK1/CHGA/SERPINF2/LEP/SLC2A5
GOBP_MOLTING_CYCLE	GOBP_MOLTING_CYCLE	101	-0.338664	-1.58992	0.00220853	0.0211228	0.0167835	4141	tags=27%, list=13%, signal=23%	ALX4/CLOCK/SMO/INTU/LAMA5/KRT27/PPP1R13L/SPINK5/FERMT1/TNFRSF19/NUMA1/TMEM79/EDAR/LRP4/KRT16/IGFBP5/NGFR/PER1/BCL2/SOX9/CDH3/NOTCH1/FST/FOXQ1/KRT14/TP63/KRT17
GOBP_POSITIVE_REGULATION_OF_UBIQUITIN_PROTEIN_TRANSFERASE_ACTIVITY	GOBP_POSITIVE_REGULATION_OF_UBIQUITIN_PROTEIN_TRANSFERASE_ACTIVITY	34	0.334609	1.9051	0.00222475	0.0212145	0.0168563	1971	tags=24%, list=6%, signal=22%	CDC20/TRIB3/RPS2/DCUN1D5/UBE2N/UBE2C/STUB1/BMI1
GOBP_RECEPTOR_CATABOLIC_PROCESS	GOBP_RECEPTOR_CATABOLIC_PROCESS	34	0.334427	1.90406	0.00222475	0.0212145	0.0168563	1417	tags=24%, list=5%, signal=22%	APOE/MYLIP/PIK3R4/BECN1/SH3GLB1/AP2S1/CLTC/LGMN
GOMF_CATALYTIC_ACTIVITY_ACTING_ON_A_RRNA	GOMF_CATALYTIC_ACTIVITY_ACTING_ON_A_RRNA	13	0.524666	2.07731	0.00225241	0.0214464	0.0170406	217	tags=23%, list=1%, signal=23%	TFB2M/METTL5/TRMT112
GOBP_SPLICEOSOMAL_SNRNP_ASSEMBLY	GOBP_SPLICEOSOMAL_SNRNP_ASSEMBLY	40	0.30346	1.77178	0.00228846	0.0217574	0.0172877	3108	tags=35%, list=10%, signal=32%	GEMIN6/SNRPF/CLNS1A/STRAP/SNRPB/LSM4/SNRPC/PRMT5/SNRPG/GEMIN8/PRPF6/PRMT7/LSM2/SNUPN
GOBP_TRICARBOXYLIC_ACID_METABOLIC_PROCESS	GOBP_TRICARBOXYLIC_ACID_METABOLIC_PROCESS	14	0.498251	2.09101	0.00230839	0.0219143	0.0174124	12179	tags=93%, list=39%, signal=57%	IDH1/ACLY/ACO2/IREB2/CS/SIRT4/IDH2/ACO1/IDH3B/GLUD1/IDH3A/ASS1/IDH3G
GOBP_ENDOTHELIUM_DEVELOPMENT	GOBP_ENDOTHELIUM_DEVELOPMENT	132	-0.326972	-1.58821	0.00233573	0.0221411	0.0175925	3535	tags=22%, list=11%, signal=20%	S1PR3/FOXC2/PRKD2/PDE2A/NOTCH4/TNFRSF1A/VEGFA/IKBKB/MIR21/MSN/STARD13/KDM6B/VCL/DLL1/FOXJ2/PTN/RHOB/PDPN/COL18A1/STC1/NOTCH1/ID1/COL22A1/APOLD1/RAPGEF3/CLDN5/CEACAM1/GSTM3/ATOH8
GOCC_CELL_CELL_JUNCTION	GOCC_CELL_CELL_JUNCTION	454	-0.25303	-1.35805	0.00234939	0.0222377	0.0176693	4758	tags=21%, list=15%, signal=18%	CDC42EP4/CDH6/CDH8/MIP/AMOT/CDH2/CDH12/AQP3/EPB41L5/CDH19/PCDHGA12/PLCG1/OBSL1/DSG3/TNK2/PARD6B/CYTH1/CDH18/FXYD1/FLRT1/ANKRD23/CLDN22/NHS/ABCB11/TMEM65/FLRT2/CDC42BPA/SPTBN4/CDH10/AMOTL2/CYTH2/FAT2/EPHA2/PTK7/PNN/PDLIM7/GJB6/ATP1A2/PDLIM4/SLC9A1/VEGFA/CADM4/CCDC85A/CNN2/SV2A/KCNA5/GJC1/CGNL1/PKP1/SYMPK/ADAM17/DLG5/EVPL/NGFR/PAK1/DSC3/VANGL2/CDH3/OBSCN/CTNND1/SORBS1/VCL/SGCA/RASIP1/DLL1/SHROOM1/A…
GOBP_LYMPH_VESSEL_DEVELOPMENT	GOBP_LYMPH_VESSEL_DEVELOPMENT	26	-0.51099	-1.86012	0.00235568	0.0222643	0.0176905	3788	tags=35%, list=12%, signal=30%	LGALS12/FOXC2/PPP3CB/EPHA2/VEGFA/PDPN/FOXC1/CCBE1/PKD1
GOBP_NEURON_PROJECTION_EXTENSION	GOBP_NEURON_PROJECTION_EXTENSION	160	-0.306251	-1.51544	0.00236119	0.0222806	0.0177034	3503	tags=22%, list=11%, signal=20%	LIMK1/LLPH/FLRT1/SLIT1/RNF157/PLXNA1/BCL11A/SEMA3A/PPP3CB/TRIM46/ULK2/LRP1/CPNE6/TNN/PLXNA4/VEGFA/SLIT3/RUFY3/SYT17/ARHGAP4/PAK1/NLGN3/SEMA4C/VCL/SRF/SEMA6A/WNT3A/AUTS2/SEMA3F/SEMA3B/SH3GL2/SLIT2/SEMA3E/FLRT3/EIF2AK4/LAMB2
GOCC_KINETOCHORE	GOCC_KINETOCHORE	110	0.202069	1.60775	0.00236436	0.0222806	0.0177034	4430	tags=35%, list=14%, signal=31%	NUDCD2/CLASP2/ITGB3BP/NUP37/DYNLL1/HJURP/PPP1CC/CENPM/SEH1L/BUB1/SEC13/AURKB/PELI1/CENPN/CENPA/FBXO28/SUMO3/TP53BP1/XPO1/CDT1/KIF22/MAD2L1/NUP160/CSNK1A1/DCTN6/PMF1/KAT2B/NUP85/ZW10/SKA2/BIRC5/DCTN3/DYNLT3/FBXW11/MIS12/CCNB1/CKAP5/DCTN5/MEAF6
GOBP_REGULATION_OF_ACTOMYOSIN_STRUCTURE_ORGANIZATION	GOBP_REGULATION_OF_ACTOMYOSIN_STRUCTURE_ORGANIZATION	93	-0.352402	-1.63218	0.0023692	0.0222934	0.0177136	3973	tags=28%, list=13%, signal=24%	APOA1/BAG4/LIMK1/EDN1/S100A10/ARAP1/CORO2B/SORBS3/DLC1/SLC9A1/ARHGEF10/CGNL1/PPM1F/MIR21/TPM1/EVL/PAK1/AKAP13/ASAP3/LPAR1/CLASP1/SMAD3/FERMT2/RAPGEF3/TGFB3/SERPINF2
GOMF_ACTININ_BINDING	GOMF_ACTININ_BINDING	36	-0.452326	-1.77743	0.0023786	0.0223207	0.0177353	2701	tags=31%, list=9%, signal=28%	LRRC10/PDLIM7/PDLIM4/ADORA2A/KCNA5/RARA/CACNA1C/PALLD/SYNPO2/CSRP1/PROM1
GOBP_REGULATION_OF_UBIQUITIN_PROTEIN_LIGASE_ACTIVITY	GOBP_REGULATION_OF_UBIQUITIN_PROTEIN_LIGASE_ACTIVITY	23	0.3848	1.95191	0.00237906	0.0223207	0.0177353	2938	tags=26%, list=9%, signal=24%	RPS7/CDC20/UBE2C/RPL23/MAD2L2/MAD2L1
GOBP_NUCLEOSOME_ASSEMBLY	GOBP_NUCLEOSOME_ASSEMBLY	58	0.265292	1.69216	0.00238303	0.0223253	0.0177389	3280	tags=33%, list=10%, signal=29%	ITGB3BP/HJURP/HAT1/CENPM/SET/RUVBL1/ASF1A/SMYD3/CENPN/TSPYL1/CENPA/MCM2/IPO4/ASF1B/OIP5/RBBP7/CHAF1B/TSPYL5/SPTY2D1
GOBP_DEOXYRIBOSE_PHOSPHATE_BIOSYNTHETIC_PROCESS	GOBP_DEOXYRIBOSE_PHOSPHATE_BIOSYNTHETIC_PROCESS	11	0.562344	2.09695	0.00238655	0.0223255	0.0177391	3366	tags=55%, list=11%, signal=49%	TBPL1/DCTD/TYMS/DUT/DCK/GUK1
GOMF_SCAFFOLD_PROTEIN_BINDING	GOMF_SCAFFOLD_PROTEIN_BINDING	58	-0.41182	-1.76703	0.00239251	0.0223487	0.0177575	2323	tags=22%, list=7%, signal=21%	ADCY5/KIF1B/KCNA5/IKBKB/LRP4/NLGN3/DLL1/ATP2B4/DLG4/SHANK3/CACNA1H/KRT5/KRT15
GOBP_DETOXIFICATION_OF_INORGANIC_COMPOUND	GOBP_DETOXIFICATION_OF_INORGANIC_COMPOUND	15	0.494302	2.09342	0.0024	0.0223715	0.0177756	12396	tags=93%, list=39%, signal=57%	ATP7A/PARK7/MT1B/MT1M/MT1H/SLC30A1/MT1F/MT1G/MT1X/MT1A/MT2A/ABCC2/MT1E/MT3
GOMF_SNAP_RECEPTOR_ACTIVITY	GOMF_SNAP_RECEPTOR_ACTIVITY	36	0.315623	1.75495	0.00240194	0.0223715	0.0177756	3154	tags=28%, list=10%, signal=25%	BET1/VAMP7/STX19/SNAP23/USE1/SEC22B/STX8/GOSR1/STX6/BNIP1
GOBP_NEURONAL_ION_CHANNEL_CLUSTERING	GOBP_NEURONAL_ION_CHANNEL_CLUSTERING	11	-0.64591	-1.82559	0.00240639	0.0223805	0.0177828	6875	tags=64%, list=22%, signal=50%	KCNIP2/SCLT1/GLDN/CNTN2/SPTBN4/PICK1/AGRN
GOCC_TRANS_GOLGI_NETWORK_TRANSPORT_VESICLE	GOCC_TRANS_GOLGI_NETWORK_TRANSPORT_VESICLE	30	0.361479	1.97938	0.00241301	0.0224095	0.0178058	2039	tags=20%, list=6%, signal=19%	TMED10/AP1S1/TMED9/ATP7A/CLTC/STEAP2
GOBP_WOUND_HEALING	GOBP_WOUND_HEALING	492	-0.2486	-1.34196	0.00242339	0.0224733	0.0178565	3505	tags=18%, list=11%, signal=16%	SH2B2/FGB/IFNA21/IFNA13/FOXC2/EDN1/ITGA2B/SERPIND1/PPARD/FER1L5/SYT11/P2RX6/AXL/MFN2/FGF2/GATA5/ZFPM2/TNFRSF12A/NOTCH4/FERMT1/DCBLD2/PTK7/DYSF/P2RX2/IRF1/VAV2/VEGFA/CADM4/A2M/ITPK1/SH2B1/ADORA2A/HBD/CD40/ADAM17/TPM1/EVPL/DOCK6/SERPING1/P2RX1/MCAM/C1QTNF1/SERPINA5/PAK1/GATA3/F10/CDH3/WNT5B/TNC/S100A8/VCL/FBLN1/DUOX1/CLASP1/SRF/GLI3/ITGA9/WNT3A/ITPR3/COL5A1/PHF21A/HBEGF/CAV1/PDPN/TYRO3/MMRN1/MYOF/S…
GOBP_POSITIVE_REGULATION_OF_NEURON_MIGRATION	GOBP_POSITIVE_REGULATION_OF_NEURON_MIGRATION	12	-0.62186	-1.81673	0.00246752	0.0228471	0.0181535	2814	tags=50%, list=9%, signal=46%	ZNF609/SEMA3A/FBXO31/SEMA6A/ARHGEF2/FLNA
GOBP_PURINE_NUCLEOTIDE_TRANSPORT	GOBP_PURINE_NUCLEOTIDE_TRANSPORT	25	0.372757	1.96913	0.00247082	0.0228471	0.0181535	2395	tags=32%, list=8%, signal=30%	ABCC4/SLC33A1/SLC25A5/SLC35B2/SLC35B3/SLC25A17/SLC25A4/ABCC11
GOCC_PRECATALYTIC_SPLICEOSOME	GOCC_PRECATALYTIC_SPLICEOSOME	49	0.286822	1.72465	0.00247798	0.0228803	0.0181799	4193	tags=47%, list=13%, signal=41%	LSM3/SNRPF/SNRPB2/LSM7/SNRPB/LSM4/LSM5/SNRPG/SF3B5/PRPF6/LSM8/SNRPA1/LSM2/ZMAT2/RNF113A/SNIP1/SMU1/SF3B1/MFAP1/SNRPD2/SNRPD1/PRPF4/PRPF8
GOMF_TBP_CLASS_PROTEIN_BINDING	GOMF_TBP_CLASS_PROTEIN_BINDING	26	0.370732	1.97118	0.00249022	0.0229602	0.0182434	3064	tags=35%, list=10%, signal=31%	DR1/GTF2A2/CAND1/RUVBL1/GTF2B/PSMC2/RUVBL2/TAF12/TAF1B
GOBP_PROTEIN_TETRAMERIZATION	GOBP_PROTEIN_TETRAMERIZATION	81	0.223788	1.63409	0.00249516	0.0229726	0.0182533	2629	tags=23%, list=8%, signal=22%	HLA-DRB1/TK1/TRPM4/HPRT1/APIP/ALDH1A3/GNMT/HSD17B10/B2M/KRT10/SNCA/OXA1L/SHMT2/ALDOA/THG1L/ALDH9A1/HSD17B8/RRM1/CBR4
GOBP_SNO_S_RNA_METABOLIC_PROCESS	GOBP_SNO_S_RNA_METABOLIC_PROCESS	14	0.495524	2.07956	0.0025019	0.0230017	0.0182764	4249	tags=50%, list=14%, signal=43%	EXOSC5/EXOSC4/EXOSC3/DKC1/RNF113A/NOLC1/EXOSC6
GOBP_NEGATIVE_REGULATION_OF_PEPTIDYL_LYSINE_ACETYLATION	GOBP_NEGATIVE_REGULATION_OF_PEPTIDYL_LYSINE_ACETYLATION	19	0.423768	2.00646	0.0025072	0.023003	0.0182774	12741	tags=89%, list=41%, signal=53%	TAF7/SET/HINT2/SNCA/SIRT1/PIH1D1/HDAC2/CTBP1/SDR16C5/KLF15/SIN3A/NOC2L/TWIST1/THAP7/SPI1/FOXP3/BRCA1
GOBP_NEGATIVE_REGULATION_OF_REACTIVE_OXYGEN_SPECIES_METABOLIC_PROCESS	GOBP_NEGATIVE_REGULATION_OF_REACTIVE_OXYGEN_SPECIES_METABOLIC_PROCESS	58	-0.410937	-1.76324	0.00250922	0.023003	0.0182774	2137	tags=26%, list=7%, signal=24%	MMP3/MIR21/BCL2/H19/ZC3H12A/ABCD1/CAV1/PON3/ATP2B4/IL10/CFLAR/CRYAB/PLIN5/PAGE4/PTGIS
GOMF_ATPASE_ACTIVITY_COUPLED_TO_TRANSMEMBRANE_MOVEMENT_OF_IONS_ROTATIONAL_MECHANISM	GOMF_ATPASE_ACTIVITY_COUPLED_TO_TRANSMEMBRANE_MOVEMENT_OF_IONS_ROTATIONAL_MECHANISM	21	0.410336	2.00158	0.00254035	0.0232551	0.0184777	3676	tags=48%, list=12%, signal=42%	ATP6V1A/ATP6V0B/ATP6V1G1/ATP6V0E2/ATP6V0E1/ATP6V0D1/ATP6V1E2/ATP6V1D/ATP6V1F/ATP6V1B2
GOBP_PYRIMIDINE_CONTAINING_COMPOUND_METABOLIC_PROCESS	GOBP_PYRIMIDINE_CONTAINING_COMPOUND_METABOLIC_PROCESS	77	0.228763	1.62168	0.00254924	0.0233032	0.0185159	2495	tags=22%, list=8%, signal=20%	TK1/PRPS1/CMPK1/UPRT/DCTPP1/TBPL1/DCTD/NME5/ENPP3/TYMS/NME7/DUT/ERH/UCK2/NME1/APOBEC3B/RRM1
GOBP_REGULATION_OF_APOPTOTIC_PROCESS_INVOLVED_IN_DEVELOPMENT	GOBP_REGULATION_OF_APOPTOTIC_PROCESS_INVOLVED_IN_DEVELOPMENT	10	-0.662453	-1.82529	0.00256146	0.0233816	0.0185782	4538	tags=60%, list=14%, signal=51%	TNFRSF1B/FOXC2/TNFRSF1A/BMP7/NOTCH1/FOXC1
GOMF_PHOSPHOLIPASE_C_ACTIVITY	GOMF_PHOSPHOLIPASE_C_ACTIVITY	28	-0.494911	-1.83843	0.00256741	0.0234025	0.0185948	6754	tags=50%, list=22%, signal=39%	NOTUM/PLCD3/PLCB3/PLCG1/PLCE1/PLCD4/BDKRB2/PLCB4/PLCL2/CCL5/GDPD5/CHRM1/EDNRA/PLCH2
GOCC_CHROMOSOME_TELOMERIC_REGION	GOCC_CHROMOSOME_TELOMERIC_REGION	114	0.202997	1.66421	0.0025793	0.0234775	0.0186544	3384	tags=27%, list=11%, signal=24%	PTGES3/NHP2/APEX1/NSMCE2/THOC7/POLR2B/HAT1/PPP1CC/XRCC5/TINF2/NLRP2/PPP1CA/DHX36/PCNA/MCM4/DPY30/THOC3/MCM2/FEN1/TP53BP1/RAD51AP1/CBX1/RPA1/NSMCE1/GAR1/NBN/RPA2/ERCC1/MCM5/CHEK1/WRNIP1
GOBP_NEGATIVE_REGULATION_OF_CYTOSOLIC_CALCIUM_ION_CONCENTRATION	GOBP_NEGATIVE_REGULATION_OF_CYTOSOLIC_CALCIUM_ION_CONCENTRATION	11	-0.640291	-1.80971	0.00258973	0.023539	0.0187033	2135	tags=45%, list=7%, signal=42%	LRP1/ATP1A2/KCNA5/SMAD3/KCNK3
GOBP_POSITIVE_REGULATION_OF_INTRINSIC_APOPTOTIC_SIGNALING_PATHWAY	GOBP_POSITIVE_REGULATION_OF_INTRINSIC_APOPTOTIC_SIGNALING_PATHWAY	57	0.250529	1.62561	0.00259689	0.0235706	0.0187284	2480	tags=21%, list=8%, signal=19%	RPS7/NCK1/RPL26/UBB/NKX3-1/BECN1/BAD/PARK7/SOD1/PRKRA/FIS1/RPS3
GOCC_PRESYNAPTIC_ACTIVE_ZONE	GOCC_PRESYNAPTIC_ACTIVE_ZONE	65	-0.376592	-1.64308	0.00260676	0.0236267	0.018773	5089	tags=32%, list=16%, signal=27%	RIMS4/SLC32A1/CDH2/RIMS2/PCLO/UNC13C/PPFIBP2/PPFIA2/SYT11/EGFLAM/PPFIBP1/CDH10/ADORA2A/SV2A/P2RX1/CTNND1/RIMS3/CNTNAP1/ATP2B4/BRSK1/CPLX3
GOBP_RIBONUCLEOSIDE_METABOLIC_PROCESS	GOBP_RIBONUCLEOSIDE_METABOLIC_PROCESS	66	0.243885	1.55964	0.00265773	0.0240547	0.019113	2421	tags=18%, list=8%, signal=17%	ENPP4/GMPS/RAN/HPRT1/GNMT/AHCY/APRT/NME5/NME7/GNAI3/NME1/APOBEC3B
GOCC_RIBONUCLEASE_P_COMPLEX	GOCC_RIBONUCLEASE_P_COMPLEX	12	0.523666	2.03112	0.00266572	0.024093	0.0191435	2734	tags=42%, list=9%, signal=38%	POP7/RPP40/HSD17B10/POP4/RPP21
GOCC_INTERCALATED_DISC	GOCC_INTERCALATED_DISC	48	-0.412428	-1.71281	0.00270089	0.0243672	0.0193613	4657	tags=31%, list=15%, signal=27%	CDH2/OBSL1/FXYD1/ANKRD23/TMEM65/SPTBN4/ATP1A2/SLC9A1/KCNA5/GJC1/PAK1/VCL/ACTN1/PGM5/DES
GOBP_METHIONINE_METABOLIC_PROCESS	GOBP_METHIONINE_METABOLIC_PROCESS	16	0.452625	2.00347	0.00270366	0.0243672	0.0193613	1642	tags=31%, list=5%, signal=30%	SMS/ENOPH1/APIP/GNMT/ADI1
GOBP_PROTOPORPHYRINOGEN_IX_METABOLIC_PROCESS	GOBP_PROTOPORPHYRINOGEN_IX_METABOLIC_PROCESS	11	0.557825	2.0801	0.00271734	0.0244561	0.019432	13886	tags=100%, list=44%, signal=56%	HMBS/IREB2/UROD/UROS/EIF2AK1/CPOX/FECH/PPOX/ALAS1/ALAD/ALAS2
GOMF_ION_GATED_CHANNEL_ACTIVITY	GOMF_ION_GATED_CHANNEL_ACTIVITY	40	-0.430061	-1.72309	0.00273243	0.0245574	0.0195125	5734	tags=42%, list=18%, signal=35%	TMEM63B/ANO1/ANO6/KCNT2/KCNMB3/TTYH3/CALHM1/KCNN3/ANO9/ANO7/ANO4/CLCA4/KCNMA1/CATSPER2/KCNN4/TMEM63A/KCNMB1
GOCC_U12_TYPE_SPLICEOSOMAL_COMPLEX	GOCC_U12_TYPE_SPLICEOSOMAL_COMPLEX	26	0.36678	1.95017	0.00276949	0.0248556	0.0197494	11712	tags=85%, list=37%, signal=53%	SNRPF/YBX1/DHX15/LSM7/SNRPB/SNRPG/SF3B5/ZCRB1/SF3B1/SNRPD2/SNRPD1/SNRPD3/SF3B4/ZMAT5/PHF5A/SNRNP48/SF3B2/RBM41/SNRNP25/SF3B3/PDCD7/RNPC3
GOCC_SM_LIKE_PROTEIN_FAMILY_COMPLEX	GOCC_SM_LIKE_PROTEIN_FAMILY_COMPLEX	81	0.222169	1.62227	0.00278656	0.0249738	0.0198433	3104	tags=30%, list=10%, signal=27%	SNRPN/LSM3/GEMIN6/SNRPF/CLNS1A/PPIH/STRAP/SNRPB2/LSM7/SNRPB/LSM4/SNRPC/LSM5/SNRPG/GEMIN8/SF3B5/PRPF6/ARFGEF1/LSM10/PRPF18/LSM8/SNRPA1/LSM2/ZMAT2
GOBP_ETHER_BIOSYNTHETIC_PROCESS	GOBP_ETHER_BIOSYNTHETIC_PROCESS	10	0.590655	2.13899	0.00280611	0.0251139	0.0199547	1528	tags=40%, list=5%, signal=38%	PEX7/CHPT1/FASN/GNPAT
GOBP_REGULATION_OF_ACTIN_FILAMENT_ORGANIZATION	GOBP_REGULATION_OF_ACTIN_FILAMENT_ORGANIZATION	246	-0.282267	-1.44953	0.00283036	0.0252956	0.020099	5065	tags=24%, list=16%, signal=20%	HIP1R/KANK3/FER/MIR214/CDC42EP4/FCHSD1/SFRP1/SSH3/ARFIP2/AVIL/APOA1/BAG4/LIMK1/SPIRE1/SPTBN2/RGS4/CCL26/SPTBN1/S100A10/SPTBN4/ELN/ARAP1/CORO2B/SORBS3/PFN4/PICK1/DLC1/SLC9A1/ARHGEF10/CGNL1/PPM1F/MIR21/TPM1/EVL/PAK1/SPTAN1/ASAP3/SVIL/BIN1/LPAR1/CLASP1/SYNPO2/VILL/SLIT2/FHOD3/SMAD3/CDC42EP5/ID1/KANK4/SHANK3/FERMT2/RAPGEF3/CCL21/CX3CL1/TGFB3/SERPINF2/LMOD1/LMOD3/FLNA
GOBP_CENTRAL_NERVOUS_SYSTEM_PROJECTION_NEURON_AXONOGENESIS	GOBP_CENTRAL_NERVOUS_SYSTEM_PROJECTION_NEURON_AXONOGENESIS	24	-0.502155	-1.78728	0.00286011	0.0255259	0.020282	2698	tags=42%, list=9%, signal=38%	EPHA4/ADARB1/SPTBN4/MYCBP2/PLXNA4/EPHB1/NR4A2/NFIB/SLIT2/EPHB6
GOBP_RESPIRATORY_SYSTEM_DEVELOPMENT	GOBP_RESPIRATORY_SYSTEM_DEVELOPMENT	179	-0.299363	-1.49404	0.00287598	0.0256318	0.0203662	3809	tags=22%, list=12%, signal=20%	RSPO2/LAMA5/WNT2B/CELSR1/SPRY2/STRA6/CCDC40/FGF2/ZFPM2/FGF9/PTK7/VEGFA/MYOCD/EDN2/CREB1/DLG5/IGFBP5/RBP4/SPRY1/KCNAB1/SFTPD/SOX9/TNC/SRF/GLI3/PTN/ITGA3/PDPN/NFIB/ALDH1A2/ERRFI1/KLF2/NOTCH1/CRISPLD2/NPHP3/FSTL3/CCBE1/FOXF1/PKD1/TGFB3
GOBP_DNA_STRAND_ELONGATION_INVOLVED_IN_DNA_REPLICATION	GOBP_DNA_STRAND_ELONGATION_INVOLVED_IN_DNA_REPLICATION	18	0.413237	1.91897	0.00288351	0.0256632	0.0203911	3473	tags=44%, list=11%, signal=40%	RFC4/PCNA/POLE3/MCM4/GINS3/POLD2/RFC3/GINS2
GOCC_PROTEIN_KINASE_COMPLEX	GOCC_PROTEIN_KINASE_COMPLEX	95	0.213246	1.60803	0.00289999	0.0257741	0.0204792	3041	tags=20%, list=10%, signal=18%	CCNO/CKS1B/CCNG2/CCNB2/CKS2/GTF2H5/PRKAG1/CDK4/CAB39/PCNA/CCNG1/MNAT1/RB1/CCNH/CCNA2/GTF2H3/BCCIP/CDK5/PRKAR1A
GOBP_TRANSCRIPTION_PREINITIATION_COMPLEX_ASSEMBLY	GOBP_TRANSCRIPTION_PREINITIATION_COMPLEX_ASSEMBLY	36	0.312445	1.73728	0.00293149	0.0259943	0.0206542	2475	tags=28%, list=8%, signal=26%	PSMC4/DR1/GTF2A2/TAF7/CAND1/GTF2B/PSMC2/RRN3/PSMC6/TAF12
GOMF_SERINE_TYPE_ENDOPEPTIDASE_INHIBITOR_ACTIVITY	GOMF_SERINE_TYPE_ENDOPEPTIDASE_INHIBITOR_ACTIVITY	91	-0.350885	-1.62108	0.00293479	0.0259943	0.0206542	1952	tags=21%, list=6%, signal=20%	SERPIND1/SPINK5/A2M/ITIH4/PAPLN/SERPING1/SERPINA5/WFIKKN1/COL6A3/SPINT3/SERPINB5/SERPINF1/WFDC2/WFDC1/SERPINE1/CPAMD8/SERPINB11/SERPINF2/COL7A1
GOBP_PEPTIDYL_PROLINE_MODIFICATION	GOBP_PEPTIDYL_PROLINE_MODIFICATION	48	0.286822	1.67895	0.00294115	0.0259943	0.0206542	3607	tags=31%, list=11%, signal=28%	PRDX4/PPIAL4A/PPIA/PPIL1/FKBP1A/FKBP11/PPIH/FKBP3/PPIL6/PPIC/EGLN1/PPIE/FKBP2/P4HB/P4HA1
GOBP_EMBRYONIC_ORGAN_DEVELOPMENT	GOBP_EMBRYONIC_ORGAN_DEVELOPMENT	398	-0.258955	-1.37817	0.00294136	0.0259943	0.0206542	4018	tags=20%, list=13%, signal=18%	SOBP/STRC/SOX17/MFAP5/NOTO/HOXA3/SMO/PCGF2/KRT19/IL3/FOXC2/EDN1/SPRY2/PPP1R13L/TBX18/HOXA6/MBD3/SIX2/FLT3LG/LHFPL5/STRA6/CCDC40/RBBP6/TBX3/CEBPB/MED12/HMX2/ZFPM2/EPHA2/HOXD9/HOXA2/PTK7/PBX4/GJB6/CEP290/VEGFA/TFEB/BMP7/RBP4/IRX5/SOCS3/PBX2/RSPO3/TBX2/GATA3/SOX9/VANGL2/RNF207/PCSK5/RNF112/SRF/DLL1/GLI3/TEAD3/WNT3A/OSR1/FBN2/COL13A1/HIPK2/ALDH1A2/RARRES2/FOXF2/SMAD3/NOTCH1/NPHP3/FOXC1/SOX15/HOXD10/A…
GOBP_MITOCHONDRIAL_TRANSMEMBRANE_TRANSPORT	GOBP_MITOCHONDRIAL_TRANSMEMBRANE_TRANSPORT	72	0.236852	1.63299	0.00294505	0.0259943	0.0206542	3935	tags=36%, list=13%, signal=32%	SLC39A8/SLC25A5/DNAJC19/MRS2/TOMM20/MRPL18/CPT2/TIMM23/ROMO1/VDAC1/GRPEL2/SLC25A22/SLC25A4/SLC25A1/GRPEL1/TST/HSPD1/SLC25A13/TOMM40/SFXN1/MID1IP1/SLC25A36/CHCHD4/SLC25A6/AIFM1/SLC25A15
GOBP_TYPE_2_IMMUNE_RESPONSE	GOBP_TYPE_2_IMMUNE_RESPONSE	35	-0.459476	-1.79506	0.00295093	0.0260104	0.020667	1786	tags=26%, list=6%, signal=24%	RARA/GATA3/BCL3/IL4R/ECM1/IL10/IL18/BCL6/IL6
GOCC_CAVEOLA	GOCC_CAVEOLA	73	-0.367303	-1.63594	0.00296818	0.0261265	0.0207592	3702	tags=25%, list=12%, signal=22%	SMO/LIPE/FXYD1/HDAC6/CORO1C/SELE/HTR2A/ATP1A2/DLC1/KCNA5/IRS1/KCNMA1/PLVAP/CAV1/MYOF/ATP2B4/EHD2/PTGIS
GOMF_RETINAL_BINDING	GOMF_RETINAL_BINDING	18	-0.550673	-1.80882	0.00298602	0.0262475	0.0208554	6246	tags=56%, list=20%, signal=45%	ADH4/CYP27C1/OPN4/RLBP1/CRABP2/STRA6/CRABP1/RBP4/RBP1/ALDH1A2
GOBP_NCRNA_EXPORT_FROM_NUCLEUS	GOBP_NCRNA_EXPORT_FROM_NUCLEUS	35	0.317015	1.7595	0.00299782	0.0263151	0.0209091	3209	tags=34%, list=10%, signal=31%	RAN/NUP37/SEH1L/SEC13/NUP54/NUP205/NUP35/NUP62/NUP88/NUP153/NCBP2/NUP160
GOBP_PYRIMIDINE_NUCLEOSIDE_TRIPHOSPHATE_BIOSYNTHETIC_PROCESS	GOBP_PYRIMIDINE_NUCLEOSIDE_TRIPHOSPHATE_BIOSYNTHETIC_PROCESS	17	0.43589	1.94261	0.00304619	0.0266532	0.0211777	2318	tags=35%, list=7%, signal=33%	TBPL1/NME5/TYMS/NME7/UCK2/NME1
GOMF_ISOPEPTIDASE_ACTIVITY	GOMF_ISOPEPTIDASE_ACTIVITY	17	0.435881	1.94257	0.00304619	0.0266532	0.0211777	2079	tags=35%, list=7%, signal=33%	EIF3F/COPS5/PSMD14/BRCC3/EIF3H/PSMD7
GOBP_REGULATION_OF_TELOMERE_MAINTENANCE	GOBP_REGULATION_OF_TELOMERE_MAINTENANCE	70	0.236813	1.62304	0.00304881	0.0266532	0.0211777	3243	tags=29%, list=10%, signal=26%	MYC/CCT2/CCT8/TCP1/CCT7/XRCC5/CCT6A/GNL3/TINF2/DHX36/AURKB/HNRNPA1/CCT5/MAPKAPK5/DKC1/CCT3/CCT4/PNKP/NBN/ERCC1
GOBP_LIPOSACCHARIDE_METABOLIC_PROCESS	GOBP_LIPOSACCHARIDE_METABOLIC_PROCESS	104	0.208815	1.71338	0.00310757	0.0270965	0.0215299	2430	tags=17%, list=8%, signal=16%	PIGK/GPAA1/PIGH/PIGP/PIGY/PIGB/PIGF/DPM1/PIGC/DPM3/GLA/PIGM/PIGW/FUCA1/PIGT/SUMF1/B4GALT3/GLB1
GOCC_ADHERENS_JUNCTION	GOCC_ADHERENS_JUNCTION	159	-0.304905	-1.5083	0.00310798	0.0270965	0.0215299	6278	tags=29%, list=20%, signal=23%	AJAP1/CTNNA3/DDX6/EPHA4/JAG1/CDH9/CRB1/CDC42EP4/CDH6/CDH8/CDH2/CDH12/EPB41L5/CDH19/TNK2/CYTH1/CDH18/SPTBN4/CDH10/CYTH2/FAT2/PDLIM7/PDLIM4/VEGFA/CCDC85A/PKP1/DLG5/CDH3/CTNND1/SORBS1/VCL/DLL1/SHROOM1/TRIM29/ZYX/NOTCH1/TLN1/NEXN/FERMT2/SYNM/DCHS1/PIP5K1C/PGM5/AHI1/CEACAM1/SHROOM4
GOBP_CAMERA_TYPE_EYE_DEVELOPMENT	GOBP_CAMERA_TYPE_EYE_DEVELOPMENT	298	-0.264541	-1.38278	0.00312634	0.0272196	0.0216278	6783	tags=28%, list=22%, signal=22%	PYGO2/TTLL5/TFAP2A/CRYBA2/CRYGC/TMOD1/MAB21L2/LRP5/FKBP8/ACVRL1/VAX2/NEUROD1/JMJD6/CRYBG3/JAG1/NEUROD4/CRYBA1/CRYBB3/RAX/CRB1/ACHE/CABP4/GDF11/MIP/COL4A1/KRT12/OPN4/OBSL1/RP1/COL8A2/NF1/WNT2B/FOXC2/SPRY2/PPP1R13L/CRYGD/SMARCD3/NHS/STRA6/RPE65/FGF2/MEGF11/EPHA2/PRPH2/TCIRG1/VEGFA/RORB/BMP7/RBP4/SPRY1/CACNA1C/TBX2/LAMC3/MEIS1/GATA3/SOX9/WNT5B/SRF/DLL1/GLI3/PTN/FBN2/SDK2/HIPK2/ALDH1A2/FOXF2/SLC4A5/S…
GOBP_ADHERENS_JUNCTION_ORGANIZATION	GOBP_ADHERENS_JUNCTION_ORGANIZATION	58	-0.407463	-1.74833	0.00313165	0.0272288	0.0216351	5775	tags=36%, list=18%, signal=30%	EPHA4/CDH9/CADM3/CDH6/CDH8/CDH2/CDH12/CDH19/CDH18/CDH10/VEGFA/NUMBL/DLG5/RAMP2/CDH3/CTNND1/VCL/JAM3/FERMT2/DCHS1/PIP5K1C
GOBP_INTERMEDIATE_FILAMENT_ORGANIZATION	GOBP_INTERMEDIATE_FILAMENT_ORGANIZATION	24	-0.500189	-1.78029	0.00319413	0.0277344	0.0220368	125	tags=21%, list=0%, signal=21%	PKP1/KRT14/DES/KRT17/NEFH
GOBP_PURINE_DEOXYRIBONUCLEOTIDE_METABOLIC_PROCESS	GOBP_PURINE_DEOXYRIBONUCLEOTIDE_METABOLIC_PROCESS	13	0.507063	2.00762	0.00321737	0.0278984	0.0221671	10037	tags=92%, list=32%, signal=63%	DCK/GUK1/ADK/NUDT15/DGUOK/NUDT1/NT5C/NUDT16/AK5/ADA/SAMHD1/XDH
GOMF_CIS_TRANS_ISOMERASE_ACTIVITY	GOMF_CIS_TRANS_ISOMERASE_ACTIVITY	36	0.309252	1.71953	0.00323409	0.0279714	0.0222251	1895	tags=25%, list=6%, signal=24%	PPIAL4A/PPIA/PPIL1/FKBP1A/DEGS1/FKBP11/PPIH/FKBP3/PPIC
GOMF_TESTOSTERONE_DEHYDROGENASE_NAD_P_ACTIVITY	GOMF_TESTOSTERONE_DEHYDROGENASE_NAD_P_ACTIVITY	10	0.582902	2.11091	0.00323452	0.0279714	0.0222251	2665	tags=50%, list=8%, signal=46%	HSD17B6/HSD17B10/AKR1C3/HSD17B8/HSD17B1
GOBP_REGULATION_OF_EXTRACELLULAR_MATRIX_DISASSEMBLY	GOBP_REGULATION_OF_EXTRACELLULAR_MATRIX_DISASSEMBLY	15	-0.589776	-1.84961	0.00324985	0.0280661	0.0223004	2135	tags=33%, list=7%, signal=31%	LRP1/CLASP1/PDPN/DDR2/IL6
GOCC_RUFFLE_MEMBRANE	GOCC_RUFFLE_MEMBRANE	90	-0.351264	-1.61897	0.0032756	0.0282145	0.0224183	5982	tags=33%, list=19%, signal=27%	EPS8L2/PSD4/MACF1/TIAM1/DNM2/HIP1R/SPATA13/EPB41L5/PLEKHO1/FGR/RASGRP2/SPRY2/CORO1C/PDE9A/ABCA7/EPHA2/FERMT1/DLC1/ADAM17/TPM1/FGD5/PAK1/ARHGEF4/ARHGEF2/PDPN/PDE4A/TLN1/PIP5K1C/FAM107A/ITGA5
GOMF_CARBON_CARBON_LYASE_ACTIVITY	GOMF_CARBON_CARBON_LYASE_ACTIVITY	46	0.283911	1.65687	0.00327584	0.0282145	0.0224183	2090	tags=22%, list=7%, signal=20%	DDC/SGPL1/HACL1/ME2/AZIN1/DDT/PDXDC1/GGCX/SHMT2/ALDOA
GOMF_POTASSIUM_CHANNEL_REGULATOR_ACTIVITY	GOMF_POTASSIUM_CHANNEL_REGULATOR_ACTIVITY	49	-0.412841	-1.72174	0.00332267	0.0285594	0.0226923	4147	tags=31%, list=13%, signal=27%	DPP10/KCNV1/KCNE3/KCNMB3/KCNIP3/SLC5A3/KCNAB1/CAV1/DRD4/SGK1/KCNS1/WNK2/WNK4/KCNMB1/FLNA
GOBP_RESPONSE_TO_FOLLICLE_STIMULATING_HORMONE	GOBP_RESPONSE_TO_FOLLICLE_STIMULATING_HORMONE	13	-0.606569	-1.81838	0.0033248	0.0285594	0.0226923	3635	tags=38%, list=12%, signal=34%	HMGCS1/PAPPA/NOTCH1/PPARGC1A/TGFBR3
GOBP_T_HELPER_2_CELL_DIFFERENTIATION	GOBP_T_HELPER_2_CELL_DIFFERENTIATION	15	-0.587391	-1.84213	0.00333709	0.0286266	0.0227458	1786	tags=40%, list=6%, signal=38%	RARA/GATA3/BCL3/IL4R/IL18/BCL6
GOBP_BLEB_ASSEMBLY	GOBP_BLEB_ASSEMBLY	10	-0.653569	-1.80082	0.00336043	0.0287883	0.0228742	4281	tags=50%, list=14%, signal=43%	ANO6/EMP3/EMP1/LPAR1/MYLK
GOCC_COHESIN_COMPLEX	GOCC_COHESIN_COMPLEX	13	-0.605299	-1.81457	0.00336884	0.028791	0.0228763	438	tags=54%, list=1%, signal=53%	DDX11/STAG3L1/SMC1B/SMC1A/REC8/STAG3L2/STAG3L3
GOMF_O_METHYLTRANSFERASE_ACTIVITY	GOMF_O_METHYLTRANSFERASE_ACTIVITY	16	0.44678	1.97759	0.00336973	0.028791	0.0228763	4362	tags=62%, list=14%, signal=54%	PCMTD2/LCMT1/BCDIN3D/COMT/FTSJ1/COQ3/PCMTD1/COMTD1/LRTOMT/PCMT1
GOBP_ETHER_METABOLIC_PROCESS	GOBP_ETHER_METABOLIC_PROCESS	21	0.405245	1.97675	0.0033933	0.0289537	0.0230056	1528	tags=29%, list=5%, signal=27%	TXN/PEX7/PLA2G7/CHPT1/FASN/GNPAT
GOMF_RETINOL_BINDING	GOMF_RETINOL_BINDING	16	-0.558816	-1.77624	0.00341629	0.0291112	0.0231307	9763	tags=75%, list=31%, signal=52%	LRAT/RBP5/ADH4/CYP27C1/C8G/ADH7/RLBP1/CRABP2/STRA6/CRABP1/RBP4/RBP1
GOBP_DNA_STRAND_ELONGATION	GOBP_DNA_STRAND_ELONGATION	24	0.376734	1.93987	0.00343103	0.0291979	0.0231997	10269	tags=83%, list=33%, signal=56%	RFC4/PCNA/POLE3/MCM4/GINS3/POLD2/NBN/RFC3/GINS2/POLA1/MCM3/POT1/LIG3/DCLRE1B/GINS4/POLD3/RAD50/LIG1/MCM7/TERT
GOBP_FATTY_ACID_BETA_OXIDATION_USING_ACYL_COA_DEHYDROGENASE	GOBP_FATTY_ACID_BETA_OXIDATION_USING_ACYL_COA_DEHYDROGENASE	10	0.577866	2.09267	0.00349156	0.0296736	0.0235777	3494	tags=60%, list=11%, signal=53%	ETFA/ACADM/ACADL/ETFDH/ETFB/IVD
GOBP_SKELETAL_MUSCLE_CELL_DIFFERENTIATION	GOBP_SKELETAL_MUSCLE_CELL_DIFFERENTIATION	60	-0.391179	-1.68366	0.00355584	0.0301799	0.0239799	3102	tags=25%, list=10%, signal=23%	DDX17/ANKRD1/BTG2/HLF/BCL9L/MYOCD/KLF5/EPHB1/ATF3/WNT3A/GPC1/NOTCH1/EGR1/MAFF/FOS
GOBP_DEVELOPMENTAL_CELL_GROWTH	GOBP_DEVELOPMENTAL_CELL_GROWTH	211	-0.29048	-1.47159	0.00357747	0.0303233	0.0240938	3503	tags=21%, list=11%, signal=19%	LIMK1/LLPH/EDN1/FLRT1/RGS4/SLIT1/HDAC6/RNF157/CRABP2/PLXNA1/BCL11A/SEMA3A/PPP3CB/TRIM46/RGS2/ULK2/LRP1/CPNE6/TNN/PLXNA4/VEGFA/SLIT3/RUFY3/SYT17/ARHGAP4/PAK1/AKAP13/NLGN3/SOX9/SEMA4C/VCL/SRF/SEMA6A/WNT3A/AUTS2/SEMA3F/SEMA3B/SH3GL2/SLIT2/RND2/SEMA3E/FLRT3/EIF2AK4/PI16/LAMB2
GOBP_ANOIKIS	GOBP_ANOIKIS	32	-0.464407	-1.77591	0.00364313	0.0308391	0.0245037	1604	tags=22%, list=5%, signal=21%	CEACAM6/BCL2/CAV1/NOTCH1/SIK1/ITGA5/PDK4
GOBP_NEGATIVE_REGULATION_OF_CELL_GROWTH	GOBP_NEGATIVE_REGULATION_OF_CELL_GROWTH	176	-0.297303	-1.48216	0.00365527	0.030901	0.0245529	2865	tags=18%, list=9%, signal=16%	PPARD/BCL11A/SEMA3A/TRIM46/RGS2/DCBLD2/CAPRIN2/SLIT3/SESN2/BCL2/ARHGAP4/PAK1/DCUN1D3/SEMA4C/SEMA6A/WNT3A/TSPYL2/SEMA3F/SEMA3B/SLIT2/SMAD3/DACT3/FHL1/BST2/SEMA3E/BCL6/WFDC1/CRYAB/PI16/MEG3/SCGB3A1
GOCC_INTRINSIC_COMPONENT_OF_PRESYNAPTIC_ACTIVE_ZONE_MEMBRANE	GOCC_INTRINSIC_COMPONENT_OF_PRESYNAPTIC_ACTIVE_ZONE_MEMBRANE	14	-0.587307	-1.79054	0.00369467	0.0311929	0.0247848	4657	tags=43%, list=15%, signal=37%	CDH2/SYT11/CDH10/P2RX1/ATP2B4/CPLX3
GOBP_REGULATION_OF_CHEMOTAXIS	GOBP_REGULATION_OF_CHEMOTAXIS	211	-0.289252	-1.46537	0.00376282	0.0317266	0.0252088	5881	tags=28%, list=19%, signal=23%	CCL1/IL34/PGF/XCL2/CCR7/TIAM1/FGF18/ZSWIM6/SEMA7A/CXCL13/DUSP3/ZNF580/SEMA5B/ANO6/MIR34A/KLRK1/IL6R/SCG2/CCL2/EDN1/CCL26/CCL19/PRKD2/NTF3/SEMA3A/CXCL17/FGF2/PADI2/MYCBP2/PLXNA4/VEGFA/EDN2/PPM1F/ADAM17/C5/ELANE/CCL5/SEMA4C/LPAR1/SEMA6A/EDN3/WNT3A/DUSP1/PTN/SEMA3F/SEMA3B/ZSWIM4/NBL1/RARRES2/SLIT2/SMAD3/NOTCH1/JAM3/SEMA3E/GSTP1/SERPINE1/CCL21/IL6/MST1
GOBP_NEGATIVE_REGULATION_OF_INTRINSIC_APOPTOTIC_SIGNALING_PATHWAY	GOBP_NEGATIVE_REGULATION_OF_INTRINSIC_APOPTOTIC_SIGNALING_PATHWAY	85	0.225127	1.63012	0.00382042	0.0321699	0.0255611	4147	tags=33%, list=13%, signal=29%	XBP1/PPIA/ARMC10/MIF/MMP9/NME5/TRIM32/HTRA2/TRAP1/PARK7/DNAJA1/HIF1A/TAF9/BCL2L12/PTTG1IP/ENO1/NONO/NDUFS3/SIRT1/TRIAP1/ELL3/PINK1/FIGNL1/ING2/HERPUD1/TPT1/SOD2/TMBIM6
GOBP_RESPONSE_TO_EPINEPHRINE	GOBP_RESPONSE_TO_EPINEPHRINE	14	-0.586492	-1.78806	0.00382741	0.0321864	0.0255742	2027	tags=36%, list=6%, signal=33%	SLC9A1/ADIPOQ/ATP2B4/PPARGC1A/PENK
GOBP_SULFUR_AMINO_ACID_METABOLIC_PROCESS	GOBP_SULFUR_AMINO_ACID_METABOLIC_PROCESS	35	0.310451	1.72306	0.00384665	0.0322858	0.0256532	605	tags=14%, list=2%, signal=14%	SMS/ENOPH1/APIP/GNMT/AHCY
GOMF_DRUG_BINDING	GOMF_DRUG_BINDING	56	0.254255	1.63168	0.00384931	0.0322858	0.0256532	3255	tags=30%, list=10%, signal=27%	PPP3CA/PPIAL4A/PPIA/PPIL1/FKBP1A/PPIH/TLR7/FKBP3/TYMS/FOLR2/PPIC/ALB/HSP90AB1/DCK/PPP3R1/PPIE/FKBP2
GOCC_NUCLEAR_PORE_NUCLEAR_BASKET	GOCC_NUCLEAR_PORE_NUCLEAR_BASKET	12	0.5158	2.00061	0.00386153	0.0322901	0.0256566	10150	tags=92%, list=32%, signal=62%	ENY2/CETN2/NUP35/NUP153/MAD2L1/PCID2/NUP98/MAD1L1/MCM3AP/CETN3/RANBP2
GOMF_DEATH_RECEPTOR_ACTIVITY	GOMF_DEATH_RECEPTOR_ACTIVITY	12	-0.606994	-1.7733	0.00387103	0.0322901	0.0256566	4538	tags=58%, list=14%, signal=50%	TNFRSF1B/EDA2R/TNFRSF4/TNFRSF1A/TNFRSF19/NGFR/TNFRSF25
GOBP_REGULATION_OF_HAIR_FOLLICLE_DEVELOPMENT	GOBP_REGULATION_OF_HAIR_FOLLICLE_DEVELOPMENT	17	-0.564263	-1.82914	0.00387225	0.0322901	0.0256566	3702	tags=41%, list=12%, signal=36%	SMO/FERMT1/NUMA1/NGFR/CDH3/FST/KRT17
GOCC_REPLISOME	GOCC_REPLISOME	23	0.36777	1.86552	0.00387332	0.0322901	0.0256566	3198	tags=39%, list=10%, signal=35%	RPA3/PCNA/PRIM2/PRIM1/CDC5L/PLRG1/RPA1/POLD2/RPA2
GOBP_REGULATION_OF_NEURAL_PRECURSOR_CELL_PROLIFERATION	GOBP_REGULATION_OF_NEURAL_PRECURSOR_CELL_PROLIFERATION	77	-0.36708	-1.64888	0.00387932	0.0322901	0.0256566	3702	tags=27%, list=12%, signal=24%	SMO/NF1/TOX/SMARCD3/CEND1/ZNF335/BTG2/RASSF10/PTBP2/VEGFA/ZNF423/SHCBP1/GLI3/WNT3A/PTN/FZD9/NOTCH1/CX3CL1/NES/LIMS2/FLNA
GOBP_CELLULAR_RESPONSE_TO_TOXIC_SUBSTANCE	GOBP_CELLULAR_RESPONSE_TO_TOXIC_SUBSTANCE	108	-0.325767	-1.5447	0.00388006	0.0322901	0.0256566	3819	tags=23%, list=12%, signal=20%	MPO/TXNDC2/PTGES/GSTA1/HBA1/NXN/GSTM1/PTGS1/HBD/SESN2/MIR21/BMP7/PIM1/CYGB/FBLN5/H19/DUOX1/SOD3/GPX8/HBA2/GSTP1/GPX2/GPX3/GSTM3/GSTM2
GOBP_REGULATION_OF_NUCLEOCYTOPLASMIC_TRANSPORT	GOBP_REGULATION_OF_NUCLEOCYTOPLASMIC_TRANSPORT	98	-0.337932	-1.57819	0.00391173	0.0324698	0.0257994	2436	tags=17%, list=8%, signal=16%	BAG3/SUPT6H/FERMT1/TCF7L2/CHP2/MX2/ZC3H12A/TARDBP/ANGPT1/DNAJC27/GLI3/SMAD3/AKAP8L/SFN/RAPGEF3/LEP/FLNA
GOBP_CYTOCHROME_COMPLEX_ASSEMBLY	GOBP_CYTOCHROME_COMPLEX_ASSEMBLY	20	0.39743	1.89944	0.00391407	0.0324698	0.0257994	2159	tags=35%, list=7%, signal=33%	UQCRFS1/COX17/SCO2/SCO1/OXA1L/FASTKD3/SURF1
GOBP_GTP_BIOSYNTHETIC_PROCESS	GOBP_GTP_BIOSYNTHETIC_PROCESS	10	0.571102	2.06818	0.00391997	0.0324698	0.0257994	6136	tags=90%, list=20%, signal=72%	NME5/NME7/NME1/IMPDH2/NME3/NME4/NME6/IMPDH1/NME2
GOMF_TRNA_BINDING	GOMF_TRNA_BINDING	45	0.283335	1.67615	0.00392191	0.0324698	0.0257994	12233	tags=82%, list=39%, signal=50%	YARS2/HSD17B10/IARS2/EIF2A/EIF2S3/RPL35A/THG1L/DARS2/DTD1/MRPS27/NSUN2/EARS2/EEF1A1/METTL1/FARSA/FARS2/IFIT5/XPOT/PSTK/ALKBH8/TRNT1/SARS2/NSUN3/PTCD1/EEFSEC/YRDC/TRNAU1AP/TRMT11/XPO5/ALKBH1/SSB/SEPSECS/TERT/IGHMBP2/SLFN11/NAT10/NSUN6
GOBP_POSITIVE_REGULATION_OF_NEURAL_PRECURSOR_CELL_PROLIFERATION	GOBP_POSITIVE_REGULATION_OF_NEURAL_PRECURSOR_CELL_PROLIFERATION	47	-0.40424	-1.66726	0.00393033	0.0324975	0.0258214	3702	tags=30%, list=12%, signal=26%	SMO/TOX/SMARCD3/ZNF335/RASSF10/VEGFA/ZNF423/GLI3/WNT3A/FZD9/NOTCH1/CX3CL1/NES/FLNA
GOBP_WATER_HOMEOSTASIS	GOBP_WATER_HOMEOSTASIS	77	-0.366701	-1.64718	0.00395614	0.0326687	0.0259575	2472	tags=19%, list=8%, signal=18%	AQP2/ADCY5/WFS1/TMEM79/KRT16/SRF/CFTR/CYP4F12/ADCY3/ADCY4/SFN/SCNN1G/ATP6V1B1/TP63/SCNN1A
GOMF_CADHERIN_BINDING_INVOLVED_IN_CELL_CELL_ADHESION	GOMF_CADHERIN_BINDING_INVOLVED_IN_CELL_CELL_ADHESION	18	0.402569	1.86943	0.00396192	0.0326743	0.0259619	1405	tags=28%, list=4%, signal=27%	EPCAM/BAIAP2L1/KRT18/RAB10/PPP1CA
GOMF_VINCULIN_BINDING	GOMF_VINCULIN_BINDING	10	-0.646346	-1.78091	0.00401841	0.0330523	0.0262623	2440	tags=50%, list=8%, signal=46%	CORO2B/SORBS3/TLN1/ACTN1/SYNM
GOBP_POSITIVE_REGULATION_OF_TYPE_2_IMMUNE_RESPONSE	GOBP_POSITIVE_REGULATION_OF_TYPE_2_IMMUNE_RESPONSE	16	-0.552877	-1.75736	0.00402556	0.0330523	0.0262623	1786	tags=31%, list=6%, signal=29%	RARA/GATA3/IL4R/IL18/IL6
GOBP_EMBRYONIC_DIGESTIVE_TRACT_DEVELOPMENT	GOBP_EMBRYONIC_DIGESTIVE_TRACT_DEVELOPMENT	30	-0.466333	-1.76169	0.00402731	0.0330523	0.0262623	3144	tags=30%, list=10%, signal=27%	SIX2/STRA6/PCSK5/GLI3/ALDH1A2/RARRES2/FOXF2/FOXF1/RBPMS2
GOBP_POSITIVE_REGULATION_OF_VIRAL_RELEASE_FROM_HOST_CELL	GOBP_POSITIVE_REGULATION_OF_VIRAL_RELEASE_FROM_HOST_CELL	14	0.479472	2.0122	0.00402838	0.0330523	0.0262623	2722	tags=43%, list=9%, signal=39%	CHMP2B/CHMP4C/CHMP3/TSG101/VPS4B/CHMP2A
GOBP_REGULATION_OF_RRNA_PROCESSING	GOBP_REGULATION_OF_RRNA_PROCESSING	12	0.513222	1.99061	0.00406084	0.033276	0.02644	8674	tags=92%, list=28%, signal=66%	TRMT112/HEATR1/RIOK2/SHQ1/KAT2B/SIRT7/UTP15/WDR75/WDR43/NUDT16/RIOK1
GOMF_UBIQUITIN_BINDING	GOMF_UBIQUITIN_BINDING	74	0.233037	1.63364	0.00406627	0.033278	0.0264415	2838	tags=19%, list=9%, signal=17%	TOP2A/CKS1B/TOM1L1/CKS2/UCHL3/TSG101/UBE2N/TRIM32/RAD23B/RNFT1/SMARCAD1/UBXN2B/WDR92/NUP62
GOCC_CELL_CELL_CONTACT_ZONE	GOCC_CELL_CELL_CONTACT_ZONE	65	-0.370531	-1.61664	0.00407501	0.0333069	0.0264646	6488	tags=32%, list=21%, signal=26%	SCN2A/AJAP1/CTNNA3/TIAM1/CDH2/OBSL1/FXYD1/ANKRD23/TMEM65/SPTBN4/ATP1A2/SLC9A1/CADM4/KCNA5/GJC1/PAK1/VCL/JAM3/ACTN1/PGM5/DES
GOBP_LONG_CHAIN_FATTY_ACID_METABOLIC_PROCESS	GOBP_LONG_CHAIN_FATTY_ACID_METABOLIC_PROCESS	114	0.199073	1.63204	0.00411151	0.0335325	0.0266438	2700	tags=22%, list=9%, signal=20%	SLC27A2/ACSM1/ELOVL5/CYP2J2/PTGES3/HSD17B4/ACSL1/AIG1/HPGD/HACL1/ACOT8/ACADL/AKR1C3/ELOVL2/CPT2/PTGES2/GPX4/ACSL3/CBR1/CYP1B1/CYP4F11/ACAA1/ACOT1/SLC27A5/ALOX15B
GOCC_U1_SNRNP	GOCC_U1_SNRNP	17	0.425543	1.8965	0.00411307	0.0335325	0.0266438	2177	tags=35%, list=7%, signal=33%	SNRPN/SNRPF/SNRPB2/SNRPB/SNRPC/SNRPG
GOBP_PYRIMIDINE_NUCLEOSIDE_MONOPHOSPHATE_BIOSYNTHETIC_PROCESS	GOBP_PYRIMIDINE_NUCLEOSIDE_MONOPHOSPHATE_BIOSYNTHETIC_PROCESS	13	0.497358	1.96919	0.00418541	0.0340564	0.02706	2203	tags=46%, list=7%, signal=43%	CMPK1/UPRT/DCTD/TYMS/DUT/UCK2
GOBP_PERIPHERAL_NERVOUS_SYSTEM_NEURON_DIFFERENTIATION	GOBP_PERIPHERAL_NERVOUS_SYSTEM_NEURON_DIFFERENTIATION	12	-0.603897	-1.76425	0.00418796	0.0340564	0.02706	2613	tags=42%, list=8%, signal=38%	POU4F1/HOXD9/ISL1/HOXD10/NEFH
GOBP_POSITIVE_REGULATION_OF_CELL_MATRIX_ADHESION	GOBP_POSITIVE_REGULATION_OF_CELL_MATRIX_ADHESION	53	-0.397555	-1.68045	0.00419638	0.0340816	0.0270801	7750	tags=38%, list=25%, signal=28%	PLEKHA2/DISC1/CD3E/PTK2B/SDC4/CCR7/SFRP1/EPB41L5/S100A10/FERMT1/RRAS/VEGFA/PPM1F/CEACAM6/EFEMP2/SMAD3/FERMT2/CCL21/CX3CL1/COL16A1
GOBP_RIBONUCLEOSIDE_TRIPHOSPHATE_METABOLIC_PROCESS	GOBP_RIBONUCLEOSIDE_TRIPHOSPHATE_METABOLIC_PROCESS	54	0.257905	1.65455	0.0042179	0.0342131	0.0271845	14174	tags=87%, list=45%, signal=48%	RAN/ATP6V1A/NME5/NME7/ALDOA/UCK2/ITPA/GNAI3/NME1/ENO1/VCP/SLC25A13/PID1/PINK1/NUDT2/ENTPD7/IMPDH2/NME3/ATP6V0C/STOML2/NME4/TMSB4X/DGUOK/GIMAP7/OPA1/NME6/IMPDH1/NME2/MFN1/UCKL1/PRKAG2/CTPS2/TREM2/RAB23/PARP1/SPHK2/FLCN/RHOQ/UCK1/AK3/CAD/PKLR/PPARA/TGFB1/LDHC/ENTPD4/GTPBP1
GOBP_NEGATIVE_REGULATION_OF_PEPTIDE_HORMONE_SECRETION	GOBP_NEGATIVE_REGULATION_OF_PEPTIDE_HORMONE_SECRETION	38	-0.424515	-1.68267	0.00423206	0.034261	0.0272226	2296	tags=26%, list=7%, signal=24%	ACVR1C/ENHO/VSNL1/CARTPT/IRS1/MIDN/KCNB1/CHGA/SYTL4/LEP
GOBP_VITAMIN_METABOLIC_PROCESS	GOBP_VITAMIN_METABOLIC_PROCESS	121	0.190173	1.66806	0.00423451	0.034261	0.0272226	2638	tags=21%, list=8%, signal=19%	MCCC2/CYB5A/LMBRD1/MMADHC/VKORC1L1/PNPO/PCCB/PDXP/BTD/AKR1C3/ACP5/LGMN/AASDHPPT/FOLR2/AKR1A1/MCCC1/CBR1/MTHFS/MTHFD2/SHMT2/VKORC1/PSAT1/CYP4F11/UBIAD1/SLC46A1
GOBP_INTEGRIN_ACTIVATION	GOBP_INTEGRIN_ACTIVATION	23	-0.502774	-1.78206	0.00424273	0.0342843	0.0272411	2243	tags=30%, list=7%, signal=28%	FERMT1/RASIP1/JAM3/TLN1/FERMT2/CX3CL1/COL16A1
GOBP_FEMALE_MEIOTIC_NUCLEAR_DIVISION	GOBP_FEMALE_MEIOTIC_NUCLEAR_DIVISION	22	0.376294	1.89007	0.00425133	0.0343105	0.0272619	3302	tags=36%, list=11%, signal=33%	TOP2A/CCNB2/AURKA/UBB/RAD51C/MLH1/PRKAR1A/TRIP13
GOBP_ATTACHMENT_OF_SPINDLE_MICROTUBULES_TO_KINETOCHORE	GOBP_ATTACHMENT_OF_SPINDLE_MICROTUBULES_TO_KINETOCHORE	26	0.348569	1.85334	0.00425893	0.0343286	0.0272763	2658	tags=31%, list=8%, signal=28%	ECT2/BECN1/SEH1L/RACGAP1/AURKB/RB1/CDC42/CDT1
GOBP_UROGENITAL_SYSTEM_DEVELOPMENT	GOBP_UROGENITAL_SYSTEM_DEVELOPMENT	309	-0.268298	-1.40648	0.00427583	0.0344215	0.0273501	4740	tags=23%, list=15%, signal=20%	KLHL3/GDF11/SFRP1/IRX3/PRKX/COL4A4/COL4A1/IL6R/SOX17/TRAF3IP1/SMO/EMX2/LAMA5/NF1/WNT2B/PLCE1/FOXC2/TBX18/SIX2/STRA6/FGF2/FREM2/AQP2/SULF2/PTK7/CEP290/HOXD13/VEGFA/WFS1/MYOCD/KANK2/LRP4/DLG5/BMP7/RBP4/SPRY1/BCL2/GATA3/ZBTB16/SOX9/VANGL2/TNC/PCSK5/ANGPT1/DLL1/GLI3/OSR1/ITGA3/ADIPOQ/ALDH1A2/SLIT2/SMAD3/SERPINB5/NOTCH1/SERPINF1/EGR1/NPHP3/FOXC1/FSTL3/ADAMTS1/CFLAR/FOXF1/DCHS1/PKD1/WNK4/AHI1/HOXD11/LA…
GOBP_MAINTENANCE_OF_PROTEIN_LOCALIZATION_IN_ORGANELLE	GOBP_MAINTENANCE_OF_PROTEIN_LOCALIZATION_IN_ORGANELLE	40	0.28986	1.69238	0.00429543	0.0345359	0.0274411	3424	tags=30%, list=11%, signal=27%	KDELR2/GPAA1/TXN/KDELR3/PARK7/TSPO/OS9/MORC3/CDK5/INSIG2/RER1/PINK1
GOMF_GENERAL_TRANSCRIPTION_INITIATION_FACTOR_ACTIVITY	GOMF_GENERAL_TRANSCRIPTION_INITIATION_FACTOR_ACTIVITY	44	0.296664	1.74178	0.0043649	0.0350271	0.0278313	2679	tags=30%, list=9%, signal=27%	DR1/GTF2A2/TAF7/TBPL1/TAF2/GTF2B/RRN3/TAF10/GTF2E1/CCNH/TAF12/TAF9/GTF2H3
GOBP_MUSCLE_CELL_MIGRATION	GOBP_MUSCLE_CELL_MIGRATION	95	-0.340889	-1.58656	0.00436745	0.0350271	0.0278313	5169	tags=31%, list=16%, signal=26%	MIR1298/MIR221/MIR26A1/MIR214/NR4A3/PLEKHO1/MIR34A/MIR638/SMO/PLXNA1/PPARD/FGF9/LRP1/MYOCD/MIR21/IGFBP5/TPM1/BCL2/FOXO4/CCL5/PAK1/LPAR1/ADIPOQ/SLIT2/GSTP1/PPARGC1A/BIN3/ADAMTS1/SERPINE1
GOMF_RNA_POLYMERASE_ACTIVITY	GOMF_RNA_POLYMERASE_ACTIVITY	37	0.301793	1.66751	0.00443243	0.0355038	0.0282101	3429	tags=41%, list=11%, signal=36%	POLR3K/POLR2B/POLR2J3/POLR2D/POLR2H/POLR2J2/POLR2F/PRIM1/POLR2L/POLR3E/POLR1C/POLR2I/POLR2G/POLR2K/POLR1D
GOCC_MULTIMERIC_RIBONUCLEASE_P_COMPLEX	GOCC_MULTIMERIC_RIBONUCLEASE_P_COMPLEX	10	0.563981	2.04239	0.00452058	0.0361196	0.0286994	2734	tags=40%, list=9%, signal=37%	POP7/RPP40/POP4/RPP21
GOMF_RIBONUCLEASE_P_RNA_BINDING	GOMF_RIBONUCLEASE_P_RNA_BINDING	10	0.563981	2.04239	0.00452058	0.0361196	0.0286994	2734	tags=40%, list=9%, signal=37%	POP7/RPP40/POP4/RPP21
GOBP_POSITIVE_REGULATION_OF_BROWN_FAT_CELL_DIFFERENTIATION	GOBP_POSITIVE_REGULATION_OF_BROWN_FAT_CELL_DIFFERENTIATION	15	-0.577839	-1.81218	0.00460298	0.036716	0.0291733	5435	tags=47%, list=17%, signal=39%	INS/TFE3/SOX13/BMP7/PIM1/FNDC5/HNRNPU
GOCC_ESCRT_III_COMPLEX	GOCC_ESCRT_III_COMPLEX	10	0.562685	2.0377	0.00460669	0.036716	0.0291733	992	tags=40%, list=3%, signal=39%	CHMP2B/CHMP4C/CHMP3/CHMP1B
GOMF_CHEMOREPELLENT_ACTIVITY	GOMF_CHEMOREPELLENT_ACTIVITY	27	-0.478987	-1.76115	0.00463179	0.0368702	0.0292958	5010	tags=44%, list=16%, signal=37%	SEMA7A/SEMA5B/APOA1/FLRT2/SEMA3A/SEMA4C/NRG3/SEMA6A/SEMA3F/SEMA3B/SEMA3E/FLRT3
GOBP_REGULATION_OF_INTRINSIC_APOPTOTIC_SIGNALING_PATHWAY_IN_RESPONSE_TO_DNA_DAMAGE_BY_P53_CLASS_MEDIATOR	GOBP_REGULATION_OF_INTRINSIC_APOPTOTIC_SIGNALING_PATHWAY_IN_RESPONSE_TO_DNA_DAMAGE_BY_P53_CLASS_MEDIATOR	15	0.470633	1.99318	0.00464394	0.0368977	0.0293177	3677	tags=60%, list=12%, signal=53%	RPL26/MIF/HNRNPK/TAF9/BCL2L12/SIRT1/TRIAP1/ELL3/ING2
GOBP_PHOSPHATIDYLETHANOLAMINE_BIOSYNTHETIC_PROCESS	GOBP_PHOSPHATIDYLETHANOLAMINE_BIOSYNTHETIC_PROCESS	13	-0.594246	-1.78144	0.00464677	0.0368977	0.0293177	5066	tags=54%, list=16%, signal=45%	PHOSPHO1/CHKB/PISD/PCYT2/LPIN1/ETNK2/SLC27A1
GOMF_RIBOSOME_BINDING	GOMF_RIBOSOME_BINDING	46	0.275503	1.6078	0.00469062	0.0371999	0.0295578	3669	tags=33%, list=12%, signal=29%	SPCS1/PRMT3/EIF2A/SRP72/YTHDF3/C1QBP/LETMD1/OXA1L/SRP19/SBDS/MRPS27/RPSA/EIF3K/MTIF3/CPEB4
GOBP_HISTONE_H4_DEACETYLATION	GOBP_HISTONE_H4_DEACETYLATION	11	0.530642	1.97873	0.0047494	0.0376195	0.0298912	14739	tags=100%, list=47%, signal=53%	SMARCAD1/HDAC3/HDAC8/SIRT2/HDAC2/HDAC1/SIRT7/REST/RCOR1/HDAC9/HDAC4
GOCC_CONDENSED_CHROMOSOME_CENTROMERIC_REGION	GOCC_CONDENSED_CHROMOSOME_CENTROMERIC_REGION	90	0.202894	1.49571	0.00477553	0.0377798	0.0300185	4430	tags=36%, list=14%, signal=31%	NCAPG/NUDCD2/CLASP2/ITGB3BP/NUP37/HJURP/PPP1CC/CENPM/SEH1L/BUB1/AURKB/PELI1/CENPN/CENPA/FBXO28/TP53BP1/CDT1/MAD2L1/CSNK1A1/DCTN6/PMF1/NUP85/ZW10/SKA2/BIRC5/DCTN3/DYNLT3/MIS12/CCNB1/CKAP5/DCTN5/MEAF6
GOBP_GTP_METABOLIC_PROCESS	GOBP_GTP_METABOLIC_PROCESS	21	0.393654	1.92021	0.00480764	0.0379841	0.0301809	3843	tags=38%, list=12%, signal=33%	RAN/NME5/NME7/GNAI3/NME1/ENTPD7/IMPDH2/NME3
GOBP_RRNA_CATABOLIC_PROCESS	GOBP_RRNA_CATABOLIC_PROCESS	18	0.396108	1.83943	0.00481322	0.0379841	0.0301809	16395	tags=94%, list=52%, signal=45%	EXOSC5/EXOSC4/EXOSC3/PELO/EXOSC9/EXOSC7/EXOSC6/XRN1/EXOSC2/DDX49/EXOSC10/EXOSC8/DEDD2/DIS3L/ERN2/SLFN13/DIS3
GOBP_CARBOHYDRATE_DERIVATIVE_TRANSPORT	GOBP_CARBOHYDRATE_DERIVATIVE_TRANSPORT	80	0.217915	1.56573	0.00487952	0.03846	0.030559	2478	tags=18%, list=8%, signal=16%	ABCC4/SLC33A1/SLC35A3/SLC25A5/AGR2/SLC37A1/SLC35B1/SLC35B2/SLC35B3/SLC25A17/SLC25A4/SLC35A5/SLC35E3/SLC35D2
GOBP_TRNA_5_LEADER_REMOVAL	GOBP_TRNA_5_LEADER_REMOVAL	11	0.524346	1.95526	0.00489164	0.0385082	0.0305973	2734	tags=36%, list=9%, signal=33%	POP7/RPP40/POP4/RPP21
GOCC_H4_H2A_HISTONE_ACETYLTRANSFERASE_COMPLEX	GOCC_H4_H2A_HISTONE_ACETYLTRANSFERASE_COMPLEX	19	0.397676	1.88292	0.00490912	0.0385984	0.030669	2527	tags=32%, list=8%, signal=29%	MORF4L2/ACTL6A/YEATS4/RUVBL1/RUVBL2/MORF4L1
GOBP_MATURATION_OF_LSU_RRNA_FROM_TRICISTRONIC_RRNA_TRANSCRIPT_SSU_RRNA_5_8S_RRNA_LSU_RRNA	GOBP_MATURATION_OF_LSU_RRNA_FROM_TRICISTRONIC_RRNA_TRANSCRIPT_SSU_RRNA_5_8S_RRNA_LSU_RRNA	14	0.469509	1.97039	0.00497295	0.0390523	0.0310296	3814	tags=43%, list=12%, signal=38%	WDR12/RPL7/ZNHIT3/GTPBP4/BOP1/DDX18
GOBP_NEGATIVE_REGULATION_OF_PROTEIN_AUTOPHOSPHORYLATION	GOBP_NEGATIVE_REGULATION_OF_PROTEIN_AUTOPHOSPHORYLATION	11	-0.619618	-1.75128	0.00502079	0.0392794	0.0312101	1590	tags=36%, list=5%, signal=35%	GFRA2/ADIPOQ/CAV1/ERRFI1
GOCC_ER_UBIQUITIN_LIGASE_COMPLEX	GOCC_ER_UBIQUITIN_LIGASE_COMPLEX	10	0.558572	2.0228	0.00503721	0.0392794	0.0312101	13862	tags=100%, list=44%, signal=56%	SEL1L/DERL1/DERL2/OS9/FAM8A1/SYVN1/RHBDD2/AUP1/SEL1L2/DERL3
GOMF_MHC_CLASS_II_RECEPTOR_ACTIVITY	GOMF_MHC_CLASS_II_RECEPTOR_ACTIVITY	10	0.557809	2.02004	0.00503721	0.0392794	0.0312101	2307	tags=50%, list=7%, signal=46%	HLA-DRB1/HLA-DQA1/HLA-DRA/HLA-DPA1/HLA-DRB3
GOMF_RNA_7_METHYLGUANOSINE_CAP_BINDING	GOMF_RNA_7_METHYLGUANOSINE_CAP_BINDING	10	0.558031	2.02084	0.00503721	0.0392794	0.0312101	13879	tags=100%, list=44%, signal=56%	EIF4E3/NCBP2/CYFIP1/EIF4E2/NCBP1/GEMIN5/LARP1/DCPS/EIF4E/EIF4E1B
GOMF_GLUTATHIONE_TRANSFERASE_ACTIVITY	GOMF_GLUTATHIONE_TRANSFERASE_ACTIVITY	25	-0.487925	-1.75377	0.00503737	0.0392794	0.0312101	7270	tags=44%, list=23%, signal=34%	GSTM4/GSTA2/HPGDS/PTGES/GSTA1/GSTM1/GSTT2/GSTP1/GSTM5/GSTM3/GSTM2
GOMF_NOTCH_BINDING	GOMF_NOTCH_BINDING	21	-0.502158	-1.73677	0.00503865	0.0392794	0.0312101	7572	tags=52%, list=24%, signal=40%	HIF1AN/CUL3/SNED1/JAG1/NOTCH4/NCOR2/DLK2/KCTD10/ADAM17/DLL1/NOTCH1
GOBP_HYDROGEN_PEROXIDE_BIOSYNTHETIC_PROCESS	GOBP_HYDROGEN_PEROXIDE_BIOSYNTHETIC_PROCESS	15	-0.570061	-1.78778	0.00512902	0.0399353	0.0317312	5983	tags=47%, list=19%, signal=38%	DUOX2/FYN/ZNF205/DUOXA2/MAOB/DUOX1/DUOXA1
GOMF_NADPLUS_BINDING	GOMF_NADPLUS_BINDING	14	0.46769	1.96275	0.00513964	0.0399387	0.031734	3778	tags=50%, list=12%, signal=44%	ALDH1A3/HPGD/HADH/CRYL1/SIRT1/SIRT2/SIRT4
GOBP_POSITIVE_REGULATION_OF_PROTEASOMAL_UBIQUITIN_DEPENDENT_PROTEIN_CATABOLIC_PROCESS	GOBP_POSITIVE_REGULATION_OF_PROTEASOMAL_UBIQUITIN_DEPENDENT_PROTEIN_CATABOLIC_PROCESS	82	0.215464	1.55465	0.00514193	0.0399387	0.031734	1956	tags=16%, list=6%, signal=15%	CDC20/TRIB3/SUMO2/RNF144B/AURKA/PSMD10/RBX1/CEBPA/MAPK9/STUB1/TRIB1/UBQLN1/RNF14
GOMF_GLUCOSIDASE_ACTIVITY	GOMF_GLUCOSIDASE_ACTIVITY	13	0.489371	1.93757	0.00515345	0.0399628	0.0317531	16035	tags=100%, list=51%, signal=49%	SI/KL/GBA/MOGS/GANAB/GBA2/LCTL/GANC/LCT/AGL/MGAM/GAA/GBA3
GOBP_KETONE_CATABOLIC_PROCESS	GOBP_KETONE_CATABOLIC_PROCESS	12	0.502592	1.94938	0.00515749	0.0399628	0.0317531	2348	tags=50%, list=7%, signal=46%	HSD17B6/CBR3/OXCT1/HAGH/PARK7/CYP4F11
GOBP_PYRIMIDINE_RIBONUCLEOTIDE_BIOSYNTHETIC_PROCESS	GOBP_PYRIMIDINE_RIBONUCLEOTIDE_BIOSYNTHETIC_PROCESS	20	0.388485	1.85669	0.00518347	0.040109	0.0318693	2318	tags=30%, list=7%, signal=28%	CMPK1/UPRT/NME5/NME7/UCK2/NME1
GOBP_NEGATIVE_REGULATION_OF_MAPK_CASCADE	GOBP_NEGATIVE_REGULATION_OF_MAPK_CASCADE	173	-0.29344	-1.46396	0.00518889	0.040109	0.0318693	5729	tags=27%, list=18%, signal=22%	ARRB1/DUSP7/DUSP9/LIF/CRYBA1/MIR221/MIR26A1/DUSP3/SFRP1/NPPA/DUSP18/NF1/LMO3/MAPK8IP1/SPRY2/RGS4/TIMP3/PSCA/GBP1/TBC1D10C/ABCA7/RGS2/LAX1/MIR21/FKTN/BMP7/SPRY1/PER1/DUSP26/NDRG2/IRAK3/FBLN1/SEMA6A/SH3RF2/ATF3/DUSP1/ADIPOQ/CAV1/DUSP8/SYNJ2BP/FOXO1/ERRFI1/GSTP1/EMILIN1/WNK2/DUSP19/DUSP5
GOBP_RESPONSE_TO_OXYGEN_LEVELS	GOBP_RESPONSE_TO_OXYGEN_LEVELS	362	-0.259971	-1.37845	0.00524251	0.0404747	0.0321599	2094	tags=14%, list=7%, signal=13%	PICK1/P2RX2/SLC9A1/VEGFA/MYOCD/KCNA5/MIR21/CREB1/ADAM17/BMP7/PLEKHN1/HSD11B2/RAMP2/VHL/BCL2/PAK1/DDIT4/LMNA/ALDH3A1/LPAR1/KCNMA1/SRF/SOD3/NR4A2/PTN/ADIPOQ/CAV1/CD38/PDPN/HIPK2/EEF2K/ACTN4/FOXO1/SMAD3/STC1/NOTCH1/EDNRA/EGR1/KCNK3/PPARGC1A/ANGPTL4/CFLAR/APOLD1/TGFB3/KCNMB1/CRYAB/ASCL2/LEP/PENK/TGFBR3/PTGIS
GOBP_RESPONSE_TO_INTERLEUKIN_12	GOBP_RESPONSE_TO_INTERLEUKIN_12	49	0.274361	1.64972	0.00525971	0.0405099	0.0321878	3032	tags=31%, list=10%, signal=28%	RPLP0/PPIA/RIPK2/MIF/TCP1/JAK1/CFL1/PSME2/BOLA2/SOD1/HSPA9/CDC42/GSTO1/SNRPA1/ARF1
GOMF_NADP_BINDING	GOMF_NADP_BINDING	48	0.276804	1.6203	0.00525971	0.0405099	0.0321878	2984	tags=27%, list=10%, signal=25%	IDH1/PGD/CBR3/GMDS/TM7SF2/QDPR/FMO5/DECR1/CAT/GRHPR/CBR4/HSD17B1/HIBADH
GOBP_PROTEIN_MONOUBIQUITINATION	GOBP_PROTEIN_MONOUBIQUITINATION	61	0.243554	1.55933	0.00532176	0.0409386	0.0325284	2416	tags=18%, list=8%, signal=17%	UBE2T/PDCD6/UBE2E1/UBB/RBX1/TSG101/LEO1/KLHL12/BMI1/TRIM25/UBE2D3
GOBP_REGULATION_OF_SPROUTING_ANGIOGENESIS	GOBP_REGULATION_OF_SPROUTING_ANGIOGENESIS	50	-0.397734	-1.66401	0.00535597	0.0411524	0.0326983	10322	tags=56%, list=33%, signal=38%	THBS1/MIR375/MIR126/MIR30B/MIR30C1/PPP1R16B/BMPER/RHOJ/MIR30E/MIR138-1/MIR1224/MIR1-1/MIR487B/CREB3L1/MIR125A/MIR221/MIR34A/EPN2/FGF2/VEGFA/SEMA6A/DLL1/SYNJ2BP/KLF2/IL10/ADAMTS9/CEACAM1/ITGA5
GOBP_POSITIVE_REGULATION_OF_MUSCLE_TISSUE_DEVELOPMENT	GOBP_POSITIVE_REGULATION_OF_MUSCLE_TISSUE_DEVELOPMENT	21	-0.501446	-1.73431	0.00537738	0.0412673	0.0327896	1675	tags=29%, list=5%, signal=27%	CREB1/BCL2/DLL1/WNT3A/PPARGC1A/LMOD3
GOBP_REGULATION_OF_HAIR_CYCLE	GOBP_REGULATION_OF_HAIR_CYCLE	26	-0.486226	-1.76998	0.00539334	0.0413404	0.0328476	3812	tags=35%, list=12%, signal=30%	CLOCK/SMO/FERMT1/NUMA1/NGFR/PER1/CDH3/FST/KRT17
GOBP_CELL_MATURATION	GOBP_CELL_MATURATION	151	-0.303529	-1.49497	0.00542375	0.0415237	0.0329933	3250	tags=21%, list=10%, signal=18%	TCP11/CCL19/CNTN2/BCL11A/SPTBN4/PCSK4/AXL/LGI4/PICK1/VEGFA/TMEM79/CDC25B/AGRN/NPR2/BCL2/PTH1R/GATA3/NTN4/CFTR/NR4A2/CATSPER2/SEMG2/KLF2/REC8/DEFB1/CCL21/DMC1/CX3CL1/TFCP2L1/SEMG1/PABPC1L
GOBP_REGULATION_OF_TELOMERE_MAINTENANCE_VIA_TELOMERE_LENGTHENING	GOBP_REGULATION_OF_TELOMERE_MAINTENANCE_VIA_TELOMERE_LENGTHENING	53	0.256577	1.64065	0.0054652	0.0417912	0.0332058	2939	tags=30%, list=9%, signal=27%	CCT2/CCT8/TCP1/CCT7/XRCC5/CCT6A/TINF2/DHX36/AURKB/HNRNPA1/CCT5/MAPKAPK5/DKC1/CCT3/CCT4/PNKP
GOBP_POLARIZED_EPITHELIAL_CELL_DIFFERENTIATION	GOBP_POLARIZED_EPITHELIAL_CELL_DIFFERENTIATION	20	-0.516207	-1.7579	0.0055059	0.0420522	0.0334133	2188	tags=35%, list=7%, signal=33%	PTK7/DLG5/MSN/MYO9A/FOXF1/AHI1/TP63
GOBP_NEGATIVE_REGULATION_OF_CHEMOTAXIS	GOBP_NEGATIVE_REGULATION_OF_CHEMOTAXIS	61	-0.379208	-1.63592	0.00551815	0.0420898	0.0334431	5010	tags=36%, list=16%, signal=30%	SEMA7A/CXCL13/DUSP3/SEMA5B/MIR34A/KLRK1/CCL2/SEMA3A/PADI2/C5/ELANE/SEMA4C/SEMA6A/WNT3A/DUSP1/SEMA3F/SEMA3B/NBL1/SLIT2/NOTCH1/SEMA3E/GSTP1
GOBP_DEMETHYLATION	GOBP_DEMETHYLATION	57	-0.386985	-1.65578	0.00552396	0.0420898	0.0334431	5807	tags=32%, list=18%, signal=26%	PHF8/JMJD6/KDM1B/TDG/PHF2/UTY/KDM5A/APOBEC3A/AICDA/APOBEC3D/TOX/TET1/APOBEC3F/GATA3/KDM6B/HSF4/APOBEC3C/CYP3A5
GOBP_SKIN_EPIDERMIS_DEVELOPMENT	GOBP_SKIN_EPIDERMIS_DEVELOPMENT	82	-0.351297	-1.59562	0.00564027	0.042925	0.0341068	4141	tags=28%, list=13%, signal=24%	ALX4/SMO/INTU/LAMA5/KRT27/SPINK5/FERMT1/TNFRSF19/NUMA1/TMEM79/EDAR/LRP4/IGFBP5/NGFR/BCL2/SOX9/CDH3/DLL1/NOTCH1/FST/FOXQ1/TP63/KRT17
GOMF_RECEPTOR_ANTAGONIST_ACTIVITY	GOMF_RECEPTOR_ANTAGONIST_ACTIVITY	18	-0.52771	-1.73339	0.00565613	0.0429946	0.0341621	7395	tags=56%, list=24%, signal=42%	DKK2/IL18BP/DKK3/ADH7/IGSF1/DKK1/CCL5/WFIKKN1/SPINT3/FST
GOMF_C_ACYLTRANSFERASE_ACTIVITY	GOMF_C_ACYLTRANSFERASE_ACTIVITY	17	0.417802	1.862	0.00568291	0.043147	0.0342832	3907	tags=53%, list=12%, signal=46%	ACSM1/HADHB/ACAT1/ACAT2/ACAA1/SPTLC2/ACSM3/SPTLC1/GCAT
GOBP_PROTEIN_PEPTIDYL_PROLYL_ISOMERIZATION	GOBP_PROTEIN_PEPTIDYL_PROLYL_ISOMERIZATION	37	0.295157	1.63085	0.00572339	0.043403	0.0344865	1895	tags=24%, list=6%, signal=23%	PPIAL4A/PPIA/PPIL1/FKBP1A/FKBP11/PPIH/FKBP3/PPIL6/PPIC
GOBP_CORTICOSTEROID_RECEPTOR_SIGNALING_PATHWAY	GOBP_CORTICOSTEROID_RECEPTOR_SIGNALING_PATHWAY	14	-0.570969	-1.74073	0.00573614	0.0434482	0.0345225	3812	tags=29%, list=12%, signal=25%	CLOCK/LMO3/CRY2/PER1
GOBP_NUCLEOTIDE_TRANSPORT	GOBP_NUCLEOTIDE_TRANSPORT	29	0.340077	1.85091	0.00578215	0.0437423	0.0347561	2395	tags=28%, list=8%, signal=26%	ABCC4/SLC33A1/SLC25A5/SLC35B2/SLC35B3/SLC25A17/SLC25A4/ABCC11
GOBP_POSITIVE_REGULATION_OF_PROTEIN_LOCALIZATION_TO_CELL_PERIPHERY	GOBP_POSITIVE_REGULATION_OF_PROTEIN_LOCALIZATION_TO_CELL_PERIPHERY	64	-0.370981	-1.61648	0.00578862	0.0437423	0.0347561	4204	tags=23%, list=13%, signal=20%	AKAP5/DPP10/SPTBN1/EPHA3/EPHA2/LRP1/STAC/NUMA1/SORBS1/ZDHHC8/WNT3A/ITGA3/ATP2B4/NKD2/CLIP3
GOBP_NUCLEUS_ORGANIZATION	GOBP_NUCLEUS_ORGANIZATION	105	0.202838	1.67311	0.0058224	0.0439457	0.0349178	3037	tags=23%, list=10%, signal=21%	GOLM1/CCNB2/CHMP5/CHMP2B/ZMPSTE24/CHMP4C/REEP3/TBPL1/CHMP1B/PARP11/SEH1L/VPS4B/TOR1AIP1/BANF1/TOR1B/NUP54/RTN4/UBXN2B/PPP2CA/CHMP2A/NUP205/NUP35/NUP153/TOR1A
GOBP_HORMONE_CATABOLIC_PROCESS	GOBP_HORMONE_CATABOLIC_PROCESS	11	0.520336	1.94031	0.00584145	0.0440015	0.0349621	1977	tags=36%, list=6%, signal=34%	HSD17B6/HSD17B11/SPP1/IDE
GOBP_REGULATION_OF_SMOOTH_MUSCLE_CONTRACTION	GOBP_REGULATION_OF_SMOOTH_MUSCLE_CONTRACTION	53	-0.391505	-1.65488	0.00584352	0.0440015	0.0349621	3458	tags=30%, list=11%, signal=27%	PLCE1/EDN1/CALCA/RGS2/OXT/ATP1A2/KCNB2/MYOCD/EDN2/MIR21/P2RX1/KCNMA1/SRF/DAPK3/CAV1/CNN1
GOBP_MITOCHONDRIAL_PROTEIN_PROCESSING	GOBP_MITOCHONDRIAL_PROTEIN_PROCESSING	12	0.495951	1.92363	0.00585849	0.0440624	0.0350105	3871	tags=58%, list=12%, signal=51%	YME1L1/MIPEP/PMPCB/IMMP2L/OMA1/SIRT4/IMMP1L
GOBP_FEMALE_GENITALIA_DEVELOPMENT	GOBP_FEMALE_GENITALIA_DEVELOPMENT	16	-0.537045	-1.70704	0.00590417	0.044354	0.0352422	2857	tags=38%, list=9%, signal=34%	STRA6/TBX3/AXL/RBP4/TYRO3/TP63
GOBP_NUCLEOTIDE_TRANSMEMBRANE_TRANSPORT	GOBP_NUCLEOTIDE_TRANSMEMBRANE_TRANSPORT	14	0.45936	1.92779	0.00597473	0.0448315	0.0356216	3771	tags=57%, list=12%, signal=50%	SLC25A5/SLC35B2/SLC35B3/SLC25A17/SLC25A4/SLC19A1/SLC25A36/SLC25A6
GOMF_WW_DOMAIN_BINDING	GOMF_WW_DOMAIN_BINDING	31	-0.454005	-1.72334	0.0059924	0.0449115	0.0356851	835	tags=32%, list=3%, signal=31%	DNM2/SCNN1B/TNK2/TCEAL6/ENAH/PRRG4/SCNN1G/TP63/TCEAL2/SCNN1A
GOBP_CHAPERONE_COFACTOR_DEPENDENT_PROTEIN_REFOLDING	GOBP_CHAPERONE_COFACTOR_DEPENDENT_PROTEIN_REFOLDING	31	0.310839	1.71867	0.00602621	0.0450594	0.0358027	3037	tags=26%, list=10%, signal=23%	HSPE1/PTGES3/HSPA8/HSPA14/SDF2/TOR1B/HSPA9/TOR1A
GOMF_CARBOXY_LYASE_ACTIVITY	GOMF_CARBOXY_LYASE_ACTIVITY	31	0.31023	1.7153	0.00602621	0.0450594	0.0358027	1825	tags=23%, list=6%, signal=21%	DDC/SGPL1/ME2/AZIN1/DDT/PDXDC1/GGCX
GOBP_REGULATION_OF_CELL_SUBSTRATE_JUNCTION_ORGANIZATION	GOBP_REGULATION_OF_CELL_SUBSTRATE_JUNCTION_ORGANIZATION	64	-0.368865	-1.60726	0.00609941	0.0455537	0.0361954	4757	tags=33%, list=15%, signal=28%	ACVRL1/MACF1/DUSP3/GPM6B/SFRP1/EPB41L5/S100A10/CORO1C/EPHA3/LRP1/DLC1/SLC9A1/VEGFA/PPM1F/VCL/CLASP1/DAPK3/SMAD3/FERMT2/COL16A1/FAM107A
GOBP_RNA_3_END_PROCESSING	GOBP_RNA_3_END_PROCESSING	117	0.188651	1.6415	0.00612371	0.0456819	0.0362973	2705	tags=19%, list=9%, signal=17%	RPS21/EXOSC5/POLR3K/EXOSC4/THOC7/SLBP/HSD17B10/CSTF2T/EXOSC3/DHX36/POLR2D/GRSF1/LEO1/MAGOH/THOC3/EIF4A3/EXOSC9/CPSF2/CPSF3/RPRD1A/DKC1/CLP1
GOBP_POSITIVE_REGULATION_OF_METAPHASE_ANAPHASE_TRANSITION_OF_CELL_CYCLE	GOBP_POSITIVE_REGULATION_OF_METAPHASE_ANAPHASE_TRANSITION_OF_CELL_CYCLE	15	0.457614	1.93804	0.00620247	0.0462121	0.0367185	2658	tags=47%, list=8%, signal=43%	NSMCE2/ANAPC7/MAD2L1BP/DLGAP5/ANAPC5/RB1/CDT1
GOBP_REGULATION_OF_BODY_FLUID_LEVELS	GOBP_REGULATION_OF_BODY_FLUID_LEVELS	469	-0.246832	-1.32851	0.0062092	0.0462121	0.0367185	2687	tags=15%, list=9%, signal=14%	P2RX6/AXL/MFN2/AQP2/GATA5/CORO2B/ZFPM2/ADCY5/OXT/NCOR2/P2RX2/IRF1/STAT5A/VAV2/VEGFA/WFS1/A2M/ITPK1/SH2B1/ADORA2A/HBD/TMEM79/CD40/KRT16/CREB1/CELSR2/HSD11B2/DOCK6/SERPING1/P2RX1/C1QTNF1/SERPINA5/GATA3/F10/VCL/FBLN1/SRF/CFTR/CYP4F12/MLLT6/WNT3A/ADCY3/ITPR3/PHF21A/CAV1/PDPN/CEL/TYRO3/MMRN1/CHRM1/SLC4A5/CSRP1/ADCY4/TLN1/MAFF/SFN/SCNN1G/ATP6V1B1/KCNN4/SERPINE1/WNK4/EHD2/CEACAM1/PRKCA/SERPINF2/MYL9/IL6…
GOBP_APPENDAGE_DEVELOPMENT	GOBP_APPENDAGE_DEVELOPMENT	158	-0.297834	-1.47088	0.00625293	0.0464752	0.0369276	2628	tags=18%, list=8%, signal=16%	TBX3/FREM2/HOXD9/HOXD13/DKK1/LRP4/BMP7/PBX2/CACNA1C/TBX2/ZBTB16/SOX9/PCSK5/SALL4/GLI3/ITGB4/OSR1/MYH3/FBN2/ALDH1A2/ZNF219/NOTCH1/HOXD10/FERMT2/RNF165/SMOC1/TP63/ROR2
GOCC_TIM23_MITOCHONDRIAL_IMPORT_INNER_MEMBRANE_TRANSLOCASE_COMPLEX	GOCC_TIM23_MITOCHONDRIAL_IMPORT_INNER_MEMBRANE_TRANSLOCASE_COMPLEX	12	0.492687	1.91097	0.00625906	0.0464752	0.0369276	3771	tags=58%, list=12%, signal=51%	DNAJC19/TIMM23/ROMO1/GRPEL2/GRPEL1/TIMM10/SLC25A6
GOCC_PODOSOME	GOCC_PODOSOME	28	-0.471349	-1.75091	0.00629782	0.0467088	0.0371132	1365	tags=21%, list=4%, signal=21%	PALLD/SVIL/VCL/ASAP1/SH3PXD2B/SH3PXD2A
GOBP_ESTABLISHMENT_OF_ENDOTHELIAL_INTESTINAL_BARRIER	GOBP_ESTABLISHMENT_OF_ENDOTHELIAL_INTESTINAL_BARRIER	11	0.514134	1.91718	0.00631635	0.0467381	0.0371365	15257	tags=100%, list=49%, signal=51%	FASN/TJP3/TJP1/RAP2C/MYD88/TJP2/CLDN1/RAPGEF2/F11R/PTPRS/ICAM1
GOBP_N_ACETYLNEURAMINATE_METABOLIC_PROCESS	GOBP_N_ACETYLNEURAMINATE_METABOLIC_PROCESS	11	0.512473	1.91098	0.00631635	0.0467381	0.0371365	8162	tags=91%, list=26%, signal=67%	GNE/CMAS/GNPDA1/GNPDA2/NPL/ST6GAL1/NAGK/RENBP/NANP/AMDHD2
GOMF_DOUBLE_STRANDED_RNA_BINDING	GOMF_DOUBLE_STRANDED_RNA_BINDING	69	0.22632	1.5385	0.00635354	0.046959	0.037312	3058	tags=29%, list=10%, signal=26%	SIDT2/DDX21/ILF2/TLR7/STRBP/CLTC/MTDH/DHX36/DHX15/EIF4H/TUBA1B/RC3H2/PRKRA/IFIH1/STAU2/HSP90AB1/ZFR/VIM/HSPD1/EIF4B
GOBP_NEGATIVE_REGULATION_OF_NEURON_DEATH	GOBP_NEGATIVE_REGULATION_OF_NEURON_DEATH	185	-0.288269	-1.44409	0.00637066	0.0470313	0.0373695	3487	tags=20%, list=11%, signal=18%	CCL2/CNTFR/UNC5B/NTF3/CLCF1/NTF4/BTG2/POU4F1/AXL/CEBPB/KIR3DL2/LRP1/SULT1A4/WFS1/ADORA2A/NFATC4/CREB1/BCL2/NRBP2/MAP3K12/ANGPT1/NR4A2/WNT3A/TYRO3/HIPK2/FZD9/ISL1/SERPINF1/PPARGC1A/IL10/XRCC2/CHGA/CX3CL1/TGFB3/NES/FOXQ1/FAIM2
GOBP_REGULATION_OF_MUSCLE_ADAPTATION	GOBP_REGULATION_OF_MUSCLE_ADAPTATION	84	-0.35077	-1.59722	0.00640764	0.047227	0.037525	3318	tags=26%, list=11%, signal=23%	EDN1/RGS4/PDE9A/GATA5/RGS2/CAMK2B/TNFRSF1A/LMCD1/SLC9A1/MIR21/IGFBP5/PAK1/LMNA/SGCA/FOXO1/ERRFI1/SMAD3/NOTCH1/ATP2B4/PPARGC1A/PRKCA/PI16
GOBP_RELEASE_OF_CYTOCHROME_C_FROM_MITOCHONDRIA	GOBP_RELEASE_OF_CYTOCHROME_C_FROM_MITOCHONDRIA	53	0.252846	1.61679	0.00641191	0.047227	0.037525	2352	tags=23%, list=7%, signal=21%	BIK/GGCT/PSMD10/PDCD5/MMP9/FAM162A/MLLT11/BNIP3/MOAP1/BAD/FIS1/PRELID1
GOCC_M_BAND	GOCC_M_BAND	23	-0.495677	-1.7569	0.00642705	0.0472842	0.0375704	4510	tags=39%, list=14%, signal=34%	SMTNL2/OBSL1/SPTBN1/CMYA5/FHL2/OBSCN/MYOM1/CRYAB/LMOD3
GOBP_POSITIVE_REGULATION_OF_OSTEOBLAST_DIFFERENTIATION	GOBP_POSITIVE_REGULATION_OF_OSTEOBLAST_DIFFERENTIATION	58	-0.391891	-1.68151	0.00645061	0.047372	0.0376402	6508	tags=33%, list=21%, signal=26%	NPPC/LRP5/MIR20B/LTF/JAG1/IL6R/GDPD2/CEBPB/JUND/PDLIM7/MIR21/BMP7/IFITM1/GLI3/FBN2/DDR2/FERMT2/IL6/TP63
GOBP_VASCULAR_ASSOCIATED_SMOOTH_MUSCLE_CELL_MIGRATION	GOBP_VASCULAR_ASSOCIATED_SMOOTH_MUSCLE_CELL_MIGRATION	39	-0.426338	-1.69764	0.00645377	0.047372	0.0376402	14894	tags=79%, list=47%, signal=42%	MIR424/PDGFB/MIR140/MIR223/DOCK4/MIR362/MIR137/MIR503/MIR218-1/MIR135B/MIR182/DOCK5/MIR15A/MIR448/PRKG1/MIR1298/MIR221/MIR26A1/MIR214/NR4A3/MIR34A/MIR638/FGF9/LRP1/MYOCD/MIR21/IGFBP5/TPM1/PAK1/ADIPOQ/ADAMTS1
GOBP_ELASTIC_FIBER_ASSEMBLY	GOBP_ELASTIC_FIBER_ASSEMBLY	10	-0.634121	-1.74723	0.00647067	0.0474417	0.0376956	1474	tags=50%, list=5%, signal=48%	FBLN5/EFEMP2/MFAP4/EMILIN1/MYH11
GOBP_NEGATIVE_REGULATION_OF_ENDOTHELIAL_CELL_DIFFERENTIATION	GOBP_NEGATIVE_REGULATION_OF_ENDOTHELIAL_CELL_DIFFERENTIATION	11	-0.607326	-1.71654	0.00649475	0.0475638	0.0377926	8533	tags=73%, list=27%, signal=53%	MIR10A/MIR1-1/JAG1/S1PR3/NOTCH4/VEGFA/FOXJ2/ID1
GOCC_MEDIATOR_COMPLEX	GOCC_MEDIATOR_COMPLEX	38	0.295121	1.74143	0.00661789	0.0484103	0.0384652	14474	tags=87%, list=46%, signal=47%	CCNC/CDK4/MED27/MED7/MED30/MED8/MED19/MED28/MED11/MED10/CDK6/MED20/MED31/CDK8/MED13L/MED23/MED4/BCLAF1/MED17/MED29/MED13/MED1/MED6/MED18/MED22/MED26/MED24/CDK9/THRAP3/MED12L/MED14/MED9/MED21
GOCC_TERTIARY_GRANULE_LUMEN	GOCC_TERTIARY_GRANULE_LUMEN	55	0.253544	1.6464	0.0066701	0.0487366	0.0387245	2894	tags=27%, list=9%, signal=25%	LYZ/IDH1/NIT2/LRG1/MMP9/ILF2/CTSD/CSTB/B2M/CANT1/ALDOA/FTH1/YPEL5/PGM1/LTA4H
GOBP_SECRETORY_GRANULE_LOCALIZATION	GOBP_SECRETORY_GRANULE_LOCALIZATION	12	-0.585581	-1.71074	0.00687033	0.0501425	0.0398415	6041	tags=42%, list=19%, signal=34%	KIF5A/PPFIA2/TRIM46/KIF1B/KIF1A
GOMF_4_IRON_4_SULFUR_CLUSTER_BINDING	GOMF_4_IRON_4_SULFUR_CLUSTER_BINDING	40	0.279947	1.6345	0.00688023	0.0501576	0.0398535	3931	tags=38%, list=13%, signal=33%	PPAT/SDHB/ACO2/CIAPIN1/PRIM2/NFU1/NUBP2/IREB2/CDKAL1/ETFDH/NDUFV1/TYW1/NDUFS2/ISCA2/NUBP1
GOCC_SITE_OF_DNA_DAMAGE	GOCC_SITE_OF_DNA_DAMAGE	71	0.222095	1.53137	0.00690564	0.0502856	0.0399552	3198	tags=31%, list=10%, signal=28%	ARPC3/RPA3/NKX3-1/XRCC5/TIMELESS/SMARCAD1/CUL5/ACTR2/ACTR3/ARPC5/MAD2L2/EXD2/TP53BP1/CBX1/PARP9/RPA1/SETMAR/ARPC1A/ARPC4/NBN/VCP/RPA2
GOMF_PHOSPHATIDYLINOSITOL_4_PHOSPHATE_BINDING	GOMF_PHOSPHATIDYLINOSITOL_4_PHOSPHATE_BINDING	25	-0.479011	-1.72173	0.00695236	0.0505684	0.0401799	4181	tags=32%, list=13%, signal=28%	ARFIP2/GSDMC/JPH2/PLEKHF1/OBSCN/GSDMB/SH3PXD2A/GSDMD
GOBP_REGULATION_OF_PH	GOBP_REGULATION_OF_PH	95	0.202988	1.53067	0.00696337	0.050591	0.0401979	3232	tags=26%, list=10%, signal=24%	AQP11/ATP6V1A/CA2/SLC4A4/SLC26A4/ATP6V0B/SNAPIN/ATP6V1G1/RAB20/GPR89A/ATP6V0E2/GRN/ATP6V0E1/ATP6AP2/SLC9A2/TMEM9/SLC9A9/TMEM165/ATP6V0D1/ATP6V1E2/CLCN3/ATP6V1D/DMXL1/CCDC115/PPT1
GOBP_POSITIVE_REGULATION_OF_HISTONE_DEACETYLATION	GOBP_POSITIVE_REGULATION_OF_HISTONE_DEACETYLATION	17	-0.545059	-1.76689	0.00700013	0.0507664	0.0403372	4347	tags=41%, list=14%, signal=35%	LRRK2/AKAP8/PRKD2/VEGFA/JDP2/AKAP8L/BCL6
GOBP_RRNA_TRANSCRIPTION	GOBP_RRNA_TRANSCRIPTION	25	0.342452	1.80904	0.00700335	0.0507664	0.0403372	20649	tags=100%, list=66%, signal=34%	PWP1/GTF3C6/TAF1B/PIH1D1/GTF3A/NCL/NOL11/IPPK/GTF3C3/GTF3C2/NPM3/GTF3C5/SIRT7/GTF3C1/SMARCB1/SMARCA4/TP53/POLR1E/GTF3C4/TCOF1/ANG/SPIN1/POLR1B/BRF1/DDX11
GOBP_NEGATIVE_REGULATION_OF_CYTOKINE_PRODUCTION_INVOLVED_IN_IMMUNE_RESPONSE	GOBP_NEGATIVE_REGULATION_OF_CYTOKINE_PRODUCTION_INVOLVED_IN_IMMUNE_RESPONSE	26	-0.478561	-1.74208	0.00704014	0.0509597	0.0404909	1588	tags=27%, list=5%, signal=26%	LILRB1/IRAK3/ANGPT1/BST2/IL10/BCL6/TGFB3
GOBP_SMOOTH_MUSCLE_TISSUE_DEVELOPMENT	GOBP_SMOOTH_MUSCLE_TISSUE_DEVELOPMENT	19	-0.525352	-1.7511	0.00704593	0.0509597	0.0404909	3702	tags=42%, list=12%, signal=37%	SMO/NF1/STRA6/SOX9/SRF/EFEMP2/OSR1/MYLK
GOBP_ENDODERM_FORMATION	GOBP_ENDODERM_FORMATION	52	-0.389622	-1.64176	0.00710597	0.051336	0.0407899	1974	tags=19%, list=6%, signal=18%	DKK1/ITGA7/COL4A2/DUSP1/COL5A1/LAMB3/ITGA5/DUSP5/COL6A1/COL7A1
GOBP_NEPHRON_EPITHELIUM_DEVELOPMENT	GOBP_NEPHRON_EPITHELIUM_DEVELOPMENT	106	-0.326348	-1.54242	0.00713408	0.0514811	0.0409051	3702	tags=22%, list=12%, signal=19%	SMO/LAMA5/WNT2B/FOXC2/SIX2/FGF2/VEGFA/BCL2/GATA3/SOX9/DLL1/GLI3/OSR1/ADIPOQ/NOTCH1/FOXC1/DCHS1/PKD1/WNK4/AHI1/HOXD11/LAMB2/PROM1
GOBP_CELLULAR_RESPONSE_TO_STEROID_HORMONE_STIMULUS	GOBP_CELLULAR_RESPONSE_TO_STEROID_HORMONE_STIMULUS	185	-0.286132	-1.43339	0.00726477	0.0523652	0.0416076	3504	tags=18%, list=11%, signal=16%	LMO3/EDN1/HDAC6/DDX17/PPARD/PADI2/CRY2/CARM1/SAFB2/NCOR2/ATP1A2/RXRA/PAQR8/KANK2/BMP7/SCGB2A1/PER1/PAK1/DDIT4/NPAS4/FOXO1/ERRFI1/STC1/ISL1/SERPINF1/SGK1/GSTP1/SCNN1G/ZFP36/CFLAR/HNRNPU/FAM107A/TP63/SSTR2
GOBP_SNRNA_METABOLIC_PROCESS	GOBP_SNRNA_METABOLIC_PROCESS	34	0.307927	1.75319	0.00729827	0.0525361	0.0417434	11171	tags=79%, list=36%, signal=51%	EXOSC5/NHP2/EXOSC4/NOP10/EXOSC3/RBM7/EXOSC9/DKC1/INTS2/EXOSC7/EXOSC6/INTS5/LARP7/ZCCHC8/INTS12/INTS8/TUT1/INTS9/EXOSC2/TOE1/INTS4/MEPCE/EXOSC10/EXOSC8/METTL4/INTS7/INTS10
GOBP_PYRIMIDINE_NUCLEOSIDE_MONOPHOSPHATE_METABOLIC_PROCESS	GOBP_PYRIMIDINE_NUCLEOSIDE_MONOPHOSPHATE_METABOLIC_PROCESS	18	0.381125	1.76985	0.00730488	0.0525361	0.0417434	2203	tags=33%, list=7%, signal=31%	CMPK1/UPRT/DCTD/TYMS/DUT/UCK2
GOBP_CYTOPLASMIC_PATTERN_RECOGNITION_RECEPTOR_SIGNALING_PATHWAY	GOBP_CYTOPLASMIC_PATTERN_RECOGNITION_RECEPTOR_SIGNALING_PATHWAY	61	0.239375	1.53257	0.00737887	0.0530088	0.042119	16134	tags=89%, list=51%, signal=43%	UBB/RIPK2/UBE2N/C1QBP/IRAK1/TSPAN6/IFIH1/RNF135/RPS27A/RIOK3/DDX60/PUM2/RELA/SLC15A3/HSPA1B/PHB/ANKRD17/UBC/PHB2/PUM1/TIFA/SLC15A4/HSPA1A/BIRC2/SEC14L1/ITCH/CYLD/NOD2/IKBKG/ZCCHC3/CASP8/MAP3K7/TRAF6/UBA52/USP15/UBE2V1/TLR4/LSM14A/MAP2K6/GPATCH3/DDX58/NOD1/CLPB/XIAP/RNF125/IRAK2/DHX58/PTPN22/NPLOC4/TRIM15/SLC15A2/IRGM/SLC46A2/MIR708
GOBP_POSITIVE_REGULATION_OF_NUCLEOCYTOPLASMIC_TRANSPORT	GOBP_POSITIVE_REGULATION_OF_NUCLEOCYTOPLASMIC_TRANSPORT	58	-0.388413	-1.66659	0.00746706	0.0535822	0.0425746	2436	tags=19%, list=8%, signal=18%	BAG3/TCF7L2/CHP2/ZC3H12A/TARDBP/GLI3/SMAD3/SFN/RAPGEF3/LEP/FLNA
GOBP_LYSOSOMAL_TRANSPORT	GOBP_LYSOSOMAL_TRANSPORT	103	0.192317	1.55531	0.00754292	0.0540039	0.0429097	3516	tags=27%, list=11%, signal=24%	CHMP5/VAMP7/CHMP2B/LAMP2/HSPA8/CHMP3/TSG101/SNAPIN/GRN/TMEM106B/SCYL2/VPS4B/ADRB2/VPS35/MTM1/USE1/STX8/GNPTAB/AP3M1/SCARB2/ARF1/AP3B1/M6PR/VCP/DTX3L/UBXN6/PINK1/NCOA4
GOBP_POSITIVE_REGULATION_OF_CELLULAR_PROTEIN_LOCALIZATION	GOBP_POSITIVE_REGULATION_OF_CELLULAR_PROTEIN_LOCALIZATION	266	-0.262376	-1.35612	0.0075477	0.0540039	0.0429097	3150	tags=17%, list=10%, signal=15%	SPTBN1/GZMB/CARD10/EPHA3/CROCC/SYT11/GAS8/ABCA7/BAG3/EPHA2/GNL3L/LRP1/STAC/NUMA1/SESN2/CHP2/LRP4/SLC5A3/MSN/NGFR/BCL2/ZDHHC1/ZC3H12A/PAK1/SORBS1/TARDBP/ZDHHC8/GLI3/WNT3A/PTN/ITGA3/USP36/SMAD3/KCNB1/SFN/ATP2B4/MAP1A/FERMT2/PPP1R13B/NKD2/LEP/TP63/CLIP3/FLNA
GOBP_UDP_N_ACETYLGLUCOSAMINE_BIOSYNTHETIC_PROCESS	GOBP_UDP_N_ACETYLGLUCOSAMINE_BIOSYNTHETIC_PROCESS	11	0.506965	1.89045	0.00755111	0.0540039	0.0429097	3158	tags=55%, list=10%, signal=49%	GFPT1/PGM3/UAP1/GNPDA1/GNPDA2/GNPNAT1
GOCC_ANCHORED_COMPONENT_OF_EXTERNAL_SIDE_OF_PLASMA_MEMBRANE	GOCC_ANCHORED_COMPONENT_OF_EXTERNAL_SIDE_OF_PLASMA_MEMBRANE	18	0.379566	1.76261	0.00756811	0.0540652	0.0429584	16691	tags=94%, list=53%, signal=44%	IGSF21/CD24/FOLR2/CD14/GP1BA/CA4/CD59/PRNP/THY1/HYAL2/PRND/FOLR3/RTBDN/PKHD1/RTN4R/EFNA5/GPIHBP1
GOBP_REGULATION_OF_T_HELPER_2_CELL_DIFFERENTIATION	GOBP_REGULATION_OF_T_HELPER_2_CELL_DIFFERENTIATION	11	-0.597111	-1.68767	0.00769234	0.0548145	0.0435537	1786	tags=36%, list=6%, signal=34%	RARA/IL4R/IL18/BCL6
GOCC_APICAL_PLASMA_MEMBRANE	GOCC_APICAL_PLASMA_MEMBRANE	328	-0.258878	-1.36275	0.00769716	0.0548145	0.0435537	5138	tags=23%, list=16%, signal=19%	SLC16A2/CYP4F2/HIP1R/SCNN1B/CRB1/MIP/CDH2/ABCG8/PDZK1/TRPM6/SLC12A3/IL6R/PLD1/PARD6B/SLC16A3/ATP6V0D2/SLC4A11/CNTFR/FXYD1/UPK1B/SPTBN2/CD300LG/PROM2/LHFPL5/NHS/ABCB11/AMN/AQP2/PRKG2/SLC12A1/GJB6/TCIRG1/P2RX2/SLC9A1/ITPK1/KCNA5/MUC13/ADAM17/CEACAM6/SLC7A9/MSN/UPK1A/PTH1R/VANGL2/CLCA4/MAL/DUOX1/KCNMA1/CFTR/DLL1/CYP4F12/SHROOM1/SLC47A1/SLC7A5/PDPN/MPDZ/MUC20/DDR2/SLC4A5/STC1/NAALADL1/NOTCH1/BST2/CSP…
GOBP_REGULATION_OF_CHEMOKINE_MEDIATED_SIGNALING_PATHWAY	GOBP_REGULATION_OF_CHEMOKINE_MEDIATED_SIGNALING_PATHWAY	10	-0.625696	-1.72402	0.00769866	0.0548145	0.0435537	3318	tags=50%, list=11%, signal=45%	EDN1/PADI2/SLIT3/CCL5/SLIT2
GOBP_CELLULAR_RESPONSE_TO_EXTRACELLULAR_STIMULUS	GOBP_CELLULAR_RESPONSE_TO_EXTRACELLULAR_STIMULUS	212	-0.27965	-1.41668	0.00771257	0.0548466	0.0435793	2622	tags=17%, list=8%, signal=16%	RPTOR/AXL/AQP2/PICK1/TNRC6A/BRSK2/EIF2AK2/MYOCD/UCN2/TFEB/SESN2/KANK2/PIM1/BCL2/CARTPT/ZC3H12A/TNC/SRF/NR4A2/JUN/ATF3/PTN/DNAJC15/FES/FOXO1/FOSL1/KCNB1/GSTP1/EIF2AK4/SIK1/BRSK1/FOS/LEP/PENK/FAM107A/PDK4
GOBP_OSTEOBLAST_DIFFERENTIATION	GOBP_OSTEOBLAST_DIFFERENTIATION	205	-0.282976	-1.43052	0.00772029	0.0548466	0.0435793	6508	tags=27%, list=21%, signal=21%	NPPC/CREB3L1/LRP5/MIR20B/HAND2/LTF/JAG1/SMAD6/SEMA7A/SOX2/ACHE/SFRP1/GDF10/IL6R/RSPO2/GDPD2/SMO/SNAI2/NF1/AMELX/CEBPB/JUND/EPHA2/HOXA2/FHL2/PDLIM7/TNN/TCIRG1/MRC2/RORB/RRBP1/MIR21/IGFBP5/BMP7/PTH1R/SOX9/TP53INP2/TNC/IFITM1/GLI3/WNT3A/FBN2/DDR2/SMAD3/SNRNP200/NOTCH1/FERMT2/HNRNPU/JUNB/SMOC1/IL6/LRP5L/PENK/TP63/COL6A1
GOBP_PEPTIDYL_THREONINE_DEPHOSPHORYLATION	GOBP_PEPTIDYL_THREONINE_DEPHOSPHORYLATION	21	-0.491217	-1.69893	0.00774846	0.0549857	0.0436898	5595	tags=38%, list=18%, signal=31%	DUSP7/DUSP9/DUSP18/PPM1F/DUSP1/PPM1B/DUSP8/DUSP5
GOBP_NEURAL_PRECURSOR_CELL_PROLIFERATION	GOBP_NEURAL_PRECURSOR_CELL_PROLIFERATION	132	-0.308955	-1.5007	0.00777483	0.0550897	0.0437724	3702	tags=22%, list=12%, signal=19%	SMO/EMX2/NF1/TOX/SMARCD3/CEND1/ZNF335/BTG2/RASSF10/PTBP2/VEGFA/NUMBL/EPHB1/ZNF423/SHCBP1/GLI3/TEAD3/WNT3A/PTN/TRNP1/ARHGEF2/FZD9/NOTCH1/AKNA/CX3CL1/NES/LIMS2/KIF1A/FLNA
GOBP_UV_PROTECTION	GOBP_UV_PROTECTION	12	-0.581	-1.69736	0.0077803	0.0550897	0.0437724	1452	tags=33%, list=5%, signal=32%	ERCC5/SCARA3/MFAP4/MC1R
GOBP_SMOOTH_MUSCLE_CELL_MIGRATION	GOBP_SMOOTH_MUSCLE_CELL_MIGRATION	82	-0.345532	-1.56943	0.00778892	0.0550898	0.0437725	5169	tags=32%, list=16%, signal=27%	MIR1298/MIR221/MIR26A1/MIR214/NR4A3/MIR34A/MIR638/PLXNA1/PPARD/FGF9/LRP1/MYOCD/MIR21/IGFBP5/TPM1/BCL2/FOXO4/CCL5/PAK1/LPAR1/ADIPOQ/SLIT2/GSTP1/PPARGC1A/ADAMTS1/SERPINE1
GOBP_CELLULAR_RESPONSE_TO_HEAT	GOBP_CELLULAR_RESPONSE_TO_HEAT	108	0.192941	1.57071	0.00794466	0.0561294	0.0445985	3320	tags=28%, list=11%, signal=25%	PTGES3/RPA3/PDCD6/HSPA8/NUP37/CXCL10/SEH1L/PDCL3/DHX36/POLR2D/STUB1/SEC13/DNAJB6/HTRA2/IRAK1/NUP54/HSP90AB1/LYN/RBBP7/RPA1/NUP205/NUP35/NUP62/NUP88/NUP153/VCP/RPA2/SIRT1/NUP160/HSP90AA1
GOBP_BASEMENT_MEMBRANE_ORGANIZATION	GOBP_BASEMENT_MEMBRANE_ORGANIZATION	30	-0.451695	-1.70639	0.00801305	0.056489	0.0448842	2833	tags=30%, list=9%, signal=27%	FLRT2/FERMT1/RAMP2/NTN4/CLASP1/CAV1/LAMB3/PHLDB1/LAMB2
GOBP_NEGATIVE_REGULATION_OF_SMOOTH_MUSCLE_CELL_MIGRATION	GOBP_NEGATIVE_REGULATION_OF_SMOOTH_MUSCLE_CELL_MIGRATION	36	-0.418161	-1.64318	0.00802043	0.056489	0.0448842	6757	tags=47%, list=22%, signal=37%	SEMA6D/PRKG1/MIR1298/MIR214/MIR34A/MIR638/PPARD/LRP1/MYOCD/MIR21/IGFBP5/TPM1/ADIPOQ/SLIT2/GSTP1/PPARGC1A/SERPINE1
GOBP_GLUCOSE_6_PHOSPHATE_METABOLIC_PROCESS	GOBP_GLUCOSE_6_PHOSPHATE_METABOLIC_PROCESS	23	0.345328	1.75168	0.008022	0.056489	0.0448842	4242	tags=52%, list=14%, signal=45%	PGAM1/PGD/PGM2/PGLS/RBKS/GPI/RPE/G6PC3/TKT/SHPK/HK2/TALDO1
GOCC_CONTRACTILE_RING	GOCC_CONTRACTILE_RING	10	0.538511	1.95016	0.00805086	0.056523	0.0449112	503	tags=30%, list=2%, signal=30%	MAEA/PDXP/PRC1
GOBP_ESTABLISHMENT_OF_PROTEIN_LOCALIZATION_TO_MITOCHONDRIAL_MEMBRANE	GOBP_ESTABLISHMENT_OF_PROTEIN_LOCALIZATION_TO_MITOCHONDRIAL_MEMBRANE	49	0.265589	1.59698	0.00805241	0.056523	0.0449112	3918	tags=45%, list=12%, signal=39%	YWHAQ/PDCD5/TFDP1/YWHAZ/ROMO1/MOAP1/BAD/YWHAG/OXA1L/TIMM9/PPP3R1/AP3B1/CALM3/AGK/HSP90AA1/HSPA4/YWHAB/TIMM10/TIMM8B/SAMM50/TOMM22/BCS1L
GOBP_COLLAGEN_ACTIVATED_TYROSINE_KINASE_RECEPTOR_SIGNALING_PATHWAY	GOBP_COLLAGEN_ACTIVATED_TYROSINE_KINASE_RECEPTOR_SIGNALING_PATHWAY	12	-0.580181	-1.69497	0.00805329	0.056523	0.0449112	4475	tags=50%, list=14%, signal=43%	COL4A1/MUSK/COL4A6/COL4A5/COL4A2/DDR2
GOBP_PYRIMIDINE_RIBONUCLEOSIDE_TRIPHOSPHATE_METABOLIC_PROCESS	GOBP_PYRIMIDINE_RIBONUCLEOSIDE_TRIPHOSPHATE_METABOLIC_PROCESS	16	0.419705	1.85775	0.00811505	0.0568319	0.0451567	14070	tags=94%, list=45%, signal=52%	NME5/NME7/UCK2/NME1/ENTPD7/NME3/NME4/NME6/NME2/UCKL1/CTPS2/UCK1/AK3/CAD/ENTPD4
GOBP_STRESS_RESPONSE_TO_METAL_ION	GOBP_STRESS_RESPONSE_TO_METAL_ION	16	0.420125	1.85961	0.00811505	0.0568319	0.0451567	18209	tags=100%, list=58%, signal=42%	ATP7A/PARK7/MT1B/MT1M/MT1H/SLC30A1/MT1F/MT1G/MT1X/MT1A/MT2A/MT1E/MT3/MT4/SLC30A10/HSPA5
GOBP_DIGESTIVE_TRACT_MORPHOGENESIS	GOBP_DIGESTIVE_TRACT_MORPHOGENESIS	43	-0.407728	-1.65805	0.00817058	0.0571584	0.0454161	4623	tags=33%, list=15%, signal=28%	SFRP1/EPB41L5/SOX17/SIX2/STRA6/HOXD13/BCL2/GLI3/SMAD3/NOTCH1/FOXF1/AHI1/RBPMS2/TP63
GOBP_NEUROBLAST_PROLIFERATION	GOBP_NEUROBLAST_PROLIFERATION	52	-0.386632	-1.62916	0.00828529	0.0578977	0.0460035	8059	tags=42%, list=26%, signal=31%	ASCL1/OTP/PLXNB2/DISC1/DAGLA/LRRK2/DMRTA2/SMO/NF1/SMARCD3/ZNF335/VEGFA/NUMBL/GLI3/TEAD3/WNT3A/PTN/ARHGEF2/FZD9/NOTCH1/AKNA/CX3CL1
GOMF_ANNEALING_ACTIVITY	GOMF_ANNEALING_ACTIVITY	13	0.469739	1.85984	0.0082977	0.0579212	0.0460222	16651	tags=100%, list=53%, signal=47%	SMARCA1/EIF4H/EIF4B/FXR1/RAD54L/SMARCAL1/DDX3X/BLM/ANXA1/RECQL/ZRANB3/RECQL4/FMR1
GOBP_REGULATION_OF_SUBSTRATE_ADHESION_DEPENDENT_CELL_SPREADING	GOBP_REGULATION_OF_SUBSTRATE_ADHESION_DEPENDENT_CELL_SPREADING	52	-0.385156	-1.62294	0.0084431	0.058872	0.0467777	3973	tags=25%, list=13%, signal=22%	APOA1/UNC13D/FGB/S100A10/CORO1C/GBP1/FBLN1/PDPN/ACTN4/FERMT2/OLFM4/LIMS2/FLNA
GOBP_TISSUE_HOMEOSTASIS	GOBP_TISSUE_HOMEOSTASIS	239	-0.269461	-1.37802	0.00845287	0.0588761	0.046781	3814	tags=19%, list=12%, signal=17%	CCDC66/RP1/SMO/NF1/VSIG1/CALCA/NAPSA/ILDR2/RPE65/PRLH/CROCC/GPR55/GJB6/TCIRG1/NXNL1/VEGFA/TFF2/MC4R/MUC13/MUC4/RBP4/BCL2/CARTPT/PTH1R/SFTPD/SOX9/CDH3/TP53INP2/VCL/ANGPT1/SRF/LCN1/CD38/SH3GL2/NOTCH1/JAM3/AZGP1/NPHP3/FOXC1/CLDN5/CIB2/PRKCA/IL6/TF/PDK4/PROM1
GOBP_CELLULAR_METABOLIC_COMPOUND_SALVAGE	GOBP_CELLULAR_METABOLIC_COMPOUND_SALVAGE	30	0.328313	1.79777	0.00848306	0.0590222	0.046897	3251	tags=30%, list=10%, signal=27%	TK1/ENOPH1/HPRT1/APIP/APRT/ADI1/UCK2/DCK/GMPR2
GOBP_KIDNEY_EPITHELIUM_DEVELOPMENT	GOBP_KIDNEY_EPITHELIUM_DEVELOPMENT	131	-0.306913	-1.49015	0.00852964	0.0592224	0.0470561	5775	tags=27%, list=18%, signal=23%	EPHA4/JAG1/SMAD6/LIF/KLHL3/GDF11/SFRP1/IRX3/SMO/LAMA5/WNT2B/FOXC2/SIX2/FGF2/VEGFA/KANK2/BMP7/SPRY1/BCL2/GATA3/SOX9/DLL1/GLI3/OSR1/ADIPOQ/SLIT2/SMAD3/NOTCH1/FOXC1/DCHS1/PKD1/WNK4/AHI1/HOXD11/LAMB2/PROM1
GOBP_RENAL_SYSTEM_PROCESS	GOBP_RENAL_SYSTEM_PROCESS	112	-0.320069	-1.5259	0.00853826	0.0592224	0.0470561	2472	tags=21%, list=8%, signal=20%	AQP2/CORO2B/SULF2/ADCY5/OXT/WFS1/ADORA2A/HSD11B2/BCL2/MCAM/PCSK5/KCNMA1/CYP4F12/MLLT6/ADCY3/ITGA3/ADIPOQ/SLC4A5/STC1/ADCY4/SGK1/ATP6V1B1/WNK4/SERPINF2
GOCC_TRANSCRIPTION_FACTOR_TFTC_COMPLEX	GOCC_TRANSCRIPTION_FACTOR_TFTC_COMPLEX	14	0.441941	1.85469	0.00854325	0.0592224	0.0470561	8284	tags=79%, list=26%, signal=58%	TAF7/TAF2/TAF10/TAF12/TAF9/TAF5L/SUPT3H/TAF4/TAF5/TADA3/TAF9B
GOBP_RESPONSE_TO_FORSKOLIN	GOBP_RESPONSE_TO_FORSKOLIN	10	-0.61928	-1.70634	0.00854881	0.0592224	0.0470561	2323	tags=40%, list=7%, signal=37%	ADCY5/CFTR/ADCY3/AHR
GOMF_CALMODULIN_BINDING	GOMF_CALMODULIN_BINDING	190	-0.282867	-1.41901	0.00861972	0.0596492	0.0473952	3463	tags=20%, list=11%, signal=18%	KCNN3/ITPKB/KCNQ5/RGS4/SPTBN1/GAP43/PPP3CB/MYO1F/VAMP2/RGS2/CAMK2B/SLC9A1/CEP97/CNN2/GEM/NGFR/ITPKA/FBXL2/CACNA1C/SPTAN1/OBSCN/CALD1/ADCY3/MYH3/EEF2K/ITPKC/MYLK/PHKA2/RGS1/ATP2B4/MYO9B/KCNN4/PCP4/AEBP1/CEACAM1/PNCK/CNN1/MYH11
GOBP_POSITIVE_REGULATION_OF_FATTY_ACID_OXIDATION	GOBP_POSITIVE_REGULATION_OF_FATTY_ACID_OXIDATION	15	-0.552299	-1.73208	0.00863598	0.0596972	0.0474334	4693	tags=40%, list=15%, signal=34%	NR4A3/PPARD/IRS1/ABCD1/PPARGC1A/PLIN5
GOBP_AGING	GOBP_AGING	287	-0.258263	-1.34454	0.00874334	0.0603387	0.0479431	3349	tags=16%, list=11%, signal=14%	MIR217/EDN1/MBD3/RETN/CALCA/TBX3/HTR2A/NFKB2/JUND/MNT/CARM1/LRP1/GNAO1/GJB6/DKK1/MIR21/KRT16/CREB1/IGFBP5/BCL2/FOXO4/GNRH1/TBX2/PTH1R/LMNA/ALDH3A1/SRF/COL4A2/JUN/SERPINF1/PPARGC1A/IL10/BCL6/PNPT1/SERPINE1/CX3CL1/TGFB3/TFCP2L1/RNF165/KCNMB1/CRYAB/FOS/LEP/PENK/KRT14/TP63
GOBP_REGULATION_OF_GLIAL_CELL_PROLIFERATION	GOBP_REGULATION_OF_GLIAL_CELL_PROLIFERATION	30	-0.44987	-1.69949	0.00874761	0.0603387	0.0479431	2228	tags=27%, list=7%, signal=25%	RNF10/CREB1/ETV5/PTN/CHRM1/NOTCH1/ASCL2/IL6
GOBP_AMP_METABOLIC_PROCESS	GOBP_AMP_METABOLIC_PROCESS	12	0.480356	1.86314	0.00876264	0.0603774	0.0479738	12276	tags=92%, list=39%, signal=56%	APRT/ADSL/AK2/PRPS2/NUDT2/ADK/AMPD1/AMPD2/NT5E/AK3/AMPD3
GOBP_NEGATIVE_REGULATION_OF_EPIDERMIS_DEVELOPMENT	GOBP_NEGATIVE_REGULATION_OF_EPIDERMIS_DEVELOPMENT	11	-0.590272	-1.66834	0.00879782	0.0605547	0.0481147	1053	tags=27%, list=3%, signal=26%	DLL1/NOTCH1/TP63
GOMF_UBIQUITIN_UBIQUITIN_LIGASE_ACTIVITY	GOMF_UBIQUITIN_UBIQUITIN_LIGASE_ACTIVITY	13	0.468279	1.85406	0.00886995	0.0609857	0.0484571	3938	tags=54%, list=13%, signal=47%	RBX1/STUB1/PELI1/PELI2/AMFR/UBE4A/UBE4B
GOBP_VERY_LONG_CHAIN_FATTY_ACID_METABOLIC_PROCESS	GOBP_VERY_LONG_CHAIN_FATTY_ACID_METABOLIC_PROCESS	28	0.343389	1.83579	0.00890151	0.0611371	0.0485774	3452	tags=46%, list=11%, signal=41%	SLC27A2/ELOVL5/HSD17B4/ACSL1/ELOVL2/ACAA1/ACOT1/SLC27A5/ACOT4/ELOVL6/ACOT2/ELOVL7/ELOVL1
GOMF_CARDIOLIPIN_BINDING	GOMF_CARDIOLIPIN_BINDING	10	-0.61759	-1.70168	0.00892665	0.0612299	0.0486512	4388	tags=40%, list=14%, signal=34%	UCP1/RPE65/PLEKHN1/GSDMD
GOMF_OXIDOREDUCTASE_ACTIVITY_ACTING_ON_THE_CH_CH_GROUP_OF_DONORS_NAD_OR_NADP_AS_ACCEPTOR	GOMF_OXIDOREDUCTASE_ACTIVITY_ACTING_ON_THE_CH_CH_GROUP_OF_DONORS_NAD_OR_NADP_AS_ACCEPTOR	26	0.331607	1.76315	0.00893413	0.0612299	0.0486512	1251	tags=19%, list=4%, signal=18%	PTGR1/FASN/TM7SF2/AKR1C3/DECR1
GOCC_NUCLEAR_REPLICATION_FORK	GOCC_NUCLEAR_REPLICATION_FORK	33	0.293164	1.66872	0.00899825	0.0616003	0.0489455	3198	tags=36%, list=10%, signal=33%	RPA3/TIMELESS/PCNA/PRIM2/SMARCAD1/PRIM1/TIPIN/CDC5L/PLRG1/RPA1/POLD2/RPA2
GOBP_POSITIVE_REGULATION_OF_SODIUM_ION_TRANSMEMBRANE_TRANSPORT	GOBP_POSITIVE_REGULATION_OF_SODIUM_ION_TRANSMEMBRANE_TRANSPORT	20	-0.501286	-1.70708	0.00900741	0.0616003	0.0489455	6481	tags=50%, list=21%, signal=40%	WNK3/NOS1/DMD/DNM2/FXYD1/SLC9A1/ACTN4/DRD4/WNK2/WNK4
GOBP_REGULATION_OF_CELL_DEVELOPMENT	GOBP_REGULATION_OF_CELL_DEVELOPMENT	456	-0.239043	-1.28324	0.00904225	0.0617726	0.0490824	8065	tags=30%, list=26%, signal=23%	MYF6/ASCL1/ROBO2/NTN1/STK11/MAP6/PTPRD/DIO3/MYF5/OTP/TNR/MCF2/PLXNB2/DISC1/RET/HOXB3/CUX2/AXIN2/FSTL4/MYADM/LRRK2/OMG/ZNF365/SEMA6D/NPPC/BNC1/ANAPC2/SERPINE2/HES3/LTF/FBXW7/PAK3/MYB/IL34/EPHA4/DMRTA2/INS/MACF1/LIF/TBX6/MYOD1/PLXNC1/TIAM1/DNM2/MIR221/SEMA7A/FEZF1/TNFRSF1B/SEMA5B/SIGLEC15/NEFL/APOA1/OBSL1/CLOCK/HES2/SMO/NF1/S1PR3/EFNB3/UNC13D/LIMK1/FGB/TCP11/LINGO1/S100A10/CRABP2/SMARCD3/CORO1C/PLX…
GOBP_HEART_VALVE_DEVELOPMENT	GOBP_HEART_VALVE_DEVELOPMENT	57	-0.376474	-1.61081	0.00905524	0.0617955	0.0491006	5523	tags=32%, list=18%, signal=26%	JAG1/SMAD6/TNFRSF1B/NPPA/SNAI2/PDE2A/STRA6/ELN/GATA5/TNFRSF1A/SLIT3/GATA3/SOX9/SLIT2/NOTCH1/EMILIN1/DCHS1/ADAMTS9
GOBP_BASIC_AMINO_ACID_TRANSMEMBRANE_TRANSPORT	GOBP_BASIC_AMINO_ACID_TRANSMEMBRANE_TRANSPORT	12	-0.576035	-1.68286	0.00914525	0.0623434	0.0495359	1032	tags=25%, list=3%, signal=24%	SLC25A29/SLC47A1/SLC7A4
GOBP_NEGATIVE_REGULATION_OF_OSTEOBLAST_PROLIFERATION	GOBP_NEGATIVE_REGULATION_OF_OSTEOBLAST_PROLIFERATION	11	-0.587806	-1.66137	0.00916631	0.0623696	0.0495568	4623	tags=73%, list=15%, signal=62%	MIR9-1/MIR138-1/SFRP1/TNN/EIF2AK2/BCL2/SMAD3/PLXNB1
GOBP_NUCLEOSIDE_TRIPHOSPHATE_BIOSYNTHETIC_PROCESS	GOBP_NUCLEOSIDE_TRIPHOSPHATE_BIOSYNTHETIC_PROCESS	51	0.250413	1.53806	0.00916857	0.0623696	0.0495568	3586	tags=31%, list=11%, signal=28%	CMPK1/ATP6V1A/TBPL1/NME5/TYMS/NME7/ALDOA/UCK2/NME1/ENO1/VCP/SLC25A13/PID1/PINK1/NUDT2/IMPDH2
GOBP_CARDIAC_CELL_FATE_COMMITMENT	GOBP_CARDIAC_CELL_FATE_COMMITMENT	11	-0.587343	-1.66006	0.00925843	0.0629141	0.0499894	3933	tags=55%, list=13%, signal=48%	SOX17/TBX18/TBX3/DKK1/WNT3A/ISL1
GOBP_REGULATION_OF_NUCLEAR_DIVISION	GOBP_REGULATION_OF_NUCLEAR_DIVISION	128	0.173744	1.45561	0.00932137	0.0632747	0.0502759	3302	tags=23%, list=11%, signal=20%	CDC20/TOM1L1/WNT5A/PDXP/NUSAP1/AURKA/NSMCE2/CDC25C/PSMG2/HOXA13/LCMT1/BUB1/ANAPC7/AURKB/MAD2L1BP/DLGAP5/PRMT5/MAD2L2/ANAPC5/RB1/CDC42/RAD51AP1/CDT1/NUP62/MAD2L1/PRKAR1A/EGF/CHEK1/TRIP13
GOMF_UBIQUITIN_SPECIFIC_PROTEASE_BINDING	GOMF_UBIQUITIN_SPECIFIC_PROTEASE_BINDING	17	0.395891	1.76435	0.00940262	0.0637358	0.0506423	3571	tags=47%, list=11%, signal=42%	CHMP3/DERL1/CLTC/PARK7/DERL2/VCP/AMFR/SPATA2
GOBP_REGULATION_OF_TYPE_2_IMMUNE_RESPONSE	GOBP_REGULATION_OF_TYPE_2_IMMUNE_RESPONSE	29	-0.455081	-1.70382	0.0094119	0.0637358	0.0506423	1786	tags=24%, list=6%, signal=23%	RARA/GATA3/IL4R/ECM1/IL18/BCL6/IL6
GOBP_REGULATION_OF_SKELETAL_MUSCLE_CELL_PROLIFERATION	GOBP_REGULATION_OF_SKELETAL_MUSCLE_CELL_PROLIFERATION	12	-0.574594	-1.67865	0.00941914	0.0637358	0.0506423	2865	tags=42%, list=9%, signal=38%	PPARD/FGF2/EPHB1/ANGPT1/CFLAR
GOMF_TUMOR_NECROSIS_FACTOR_ACTIVATED_RECEPTOR_ACTIVITY	GOMF_TUMOR_NECROSIS_FACTOR_ACTIVATED_RECEPTOR_ACTIVITY	10	-0.614239	-1.69245	0.00949342	0.0641707	0.0509879	4538	tags=60%, list=14%, signal=51%	TNFRSF1B/EDA2R/TNFRSF4/TNFRSF1A/TNFRSF19/TNFRSF25
GOBP_TRNA_METHYLATION	GOBP_TRNA_METHYLATION	30	0.326493	1.7878	0.00953684	0.0643344	0.0511179	16382	tags=93%, list=52%, signal=45%	TRMT112/HSD17B10/LCMT2/BCDIN3D/THUMPD3/METTL6/FTSJ1/TRMT5/NSUN2/TRMT12/METTL1/MTO1/ALKBH8/NSUN3/TRDMT1/WDR4/TRMT11/TARBP1/TRMT6/GTPBP3/TRMT2B/METTL2A/NSUN6/THUMPD2/THADA/METTL2B/METTL8/TRMT1
GOBP_NEURON_PROJECTION_EXTENSION_INVOLVED_IN_NEURON_PROJECTION_GUIDANCE	GOBP_NEURON_PROJECTION_EXTENSION_INVOLVED_IN_NEURON_PROJECTION_GUIDANCE	37	-0.411007	-1.63073	0.00953772	0.0643344	0.0511179	5010	tags=38%, list=16%, signal=32%	SEMA7A/SEMA5B/SLIT1/SEMA3A/PLXNA4/VEGFA/SLIT3/SEMA4C/SEMA6A/WNT3A/SEMA3F/SEMA3B/SLIT2/SEMA3E
GOCC_ADA2_GCN5_ADA3_TRANSCRIPTION_ACTIVATOR_COMPLEX	GOCC_ADA2_GCN5_ADA3_TRANSCRIPTION_ACTIVATOR_COMPLEX	13	0.465752	1.84406	0.00955665	0.0643943	0.0511655	12668	tags=92%, list=40%, signal=55%	DR1/POLE4/POLE3/ZZZ3/KAT2B/MBIP/TADA3/YEATS2/MAP3K7/UBAP2L/WDR5/HCFC1
GOCC_DNA_HELICASE_COMPLEX	GOCC_DNA_HELICASE_COMPLEX	15	0.436671	1.84935	0.00957461	0.0644442	0.0512052	2569	tags=33%, list=8%, signal=31%	UCHL5/ACTL6A/RUVBL1/RUVBL2/YY1
GOCC_BLOOD_MICROPARTICLE	GOCC_BLOOD_MICROPARTICLE	112	-0.316612	-1.50941	0.00959607	0.0644442	0.0512052	1961	tags=20%, list=6%, signal=18%	HPX/A2M/ACTG2/HBD/CFB/ITIH4/MSN/SERPING1/HSPA6/APOL1/GRIPAP1/ORM1/C1RL/LGALS3BP/HBA2/ACTC1/ANGPTL4/ACTA1/CIB2/SERPINF2/TF/ORM2
GOBP_RNA_MODIFICATION	GOBP_RNA_MODIFICATION	131	0.178679	1.58782	0.00959812	0.0644442	0.0512052	3398	tags=22%, list=11%, signal=20%	TFB2M/METTL5/TRMT112/NHP2/HSD17B10/NOP10/TPRKB/LCMT2/RBM47/BCDIN3D/THUMPD3/THG1L/CDKAL1/KTI12/APOBEC3B/METTL6/FTSJ1/DKC1/RBM15B/RPUSD1/ELP4/METTL3/METTL14/GAR1/TRMT5/TYW1/PUS7/NSUN2/DUS4L
GOCC_PLATELET_ALPHA_GRANULE_LUMEN	GOCC_PLATELET_ALPHA_GRANULE_LUMEN	64	-0.360367	-1.57023	0.00960428	0.0644442	0.0512052	1966	tags=19%, list=6%, signal=18%	VEGFA/A2M/SERPING1/ORM1/MMRN1/ACTN4/CFD/ACTN1/SERPINE1/TGFB3/SERPINF2/ORM2
GOBP_REGULATION_OF_MUSCLE_CONTRACTION	GOBP_REGULATION_OF_MUSCLE_CONTRACTION	149	-0.293386	-1.44433	0.00968847	0.0649194	0.0515828	3458	tags=19%, list=11%, signal=17%	PLCE1/MYBPC3/EDN1/CALCA/RGS2/OXT/ATP1A2/SLC9A1/KCNB2/MYOCD/EDN2/MIR21/TPM1/CACNA1C/P2RX1/ZC3H12A/RNF207/BIN1/KCNMA1/SRF/DAPK3/CAV1/STC1/CHGA/MYL9/GSTM2/CNN1/HSPB6/SSTR2
GOBP_NEURON_PROJECTION_REGENERATION	GOBP_NEURON_PROJECTION_REGENERATION	54	-0.382599	-1.62362	0.00969536	0.0649194	0.0515828	7842	tags=41%, list=25%, signal=31%	MTR/TNR/FOLR1/OMG/ULK1/EPHA4/PRRX1/MIR221/RTN4RL1/NEFL/APOA1/GAP43/LRP1/RGMA/BCL2/TNC/PTN/ISL1/JAM3/MAPK8IP3/LAMB2/FLNA
GOBP_APPENDAGE_MORPHOGENESIS	GOBP_APPENDAGE_MORPHOGENESIS	127	-0.31091	-1.5052	0.0100494	0.0672199	0.0534106	4141	tags=23%, list=13%, signal=20%	ALX4/RSPO2/INTU/PITX1/CRABP2/TBX3/FREM2/HOXD9/HOXD13/LRP4/BMP7/PBX2/CACNA1C/TBX2/ZBTB16/SOX9/PCSK5/SALL4/GLI3/OSR1/MYH3/FBN2/ALDH1A2/ZNF219/NOTCH1/HOXD10/RNF165/TP63/ROR2
GOBP_PYRIMIDINE_CONTAINING_COMPOUND_CATABOLIC_PROCESS	GOBP_PYRIMIDINE_CONTAINING_COMPOUND_CATABOLIC_PROCESS	38	-0.398397	-1.57914	0.0100958	0.0674595	0.053601	5234	tags=34%, list=17%, signal=29%	NEIL2/TDG/UPP2/NEIL1/UPP1/APOBEC3A/AICDA/APOBEC3D/TET1/DPYS/APOBEC3F/APOBEC3C/MBD4
GOBP_CELLULAR_MODIFIED_AMINO_ACID_BIOSYNTHETIC_PROCESS	GOBP_CELLULAR_MODIFIED_AMINO_ACID_BIOSYNTHETIC_PROCESS	46	0.258851	1.51062	0.0101195	0.0675475	0.053671	3343	tags=28%, list=11%, signal=25%	GGCT/ACADM/ALDH7A1/PTDSS1/HAGH/MGST2/PARK7/MTHFS/CKMT1A/ALDH9A1/CKMT1B/GART/MTHFD1
GOBP_NEGATIVE_REGULATION_OF_UBIQUITIN_PROTEIN_TRANSFERASE_ACTIVITY	GOBP_NEGATIVE_REGULATION_OF_UBIQUITIN_PROTEIN_TRANSFERASE_ACTIVITY	16	0.415465	1.83899	0.0101895	0.0678994	0.0539506	3250	tags=38%, list=10%, signal=34%	RPS7/PARK7/RPL23/MAD2L2/MAD2L1/DTX3L
GOBP_MITOCHONDRIAL_RNA_METABOLIC_PROCESS	GOBP_MITOCHONDRIAL_RNA_METABOLIC_PROCESS	34	0.298534	1.6997	0.0101934	0.0678994	0.0539506	3386	tags=32%, list=11%, signal=29%	TFB2M/YARS2/HSD17B10/GRSF1/MRPL12/WARS2/DARS2/PDE12/FASTKD5/TRMT5/EARS2
GOBP_PEPTIDYL_PROLINE_HYDROXYLATION	GOBP_PEPTIDYL_PROLINE_HYDROXYLATION	11	0.495683	1.84837	0.0102134	0.067962	0.0540003	10512	tags=91%, list=33%, signal=60%	PRDX4/EGLN1/P4HB/P4HA1/P4HTM/CRTAP/OGFOD1/P4HA2/EGLN3/P4HA3
GOBP_INOSITOL_PHOSPHATE_MEDIATED_SIGNALING	GOBP_INOSITOL_PHOSPHATE_MEDIATED_SIGNALING	49	-0.385663	-1.60839	0.0102826	0.0683516	0.0543098	3458	tags=31%, list=11%, signal=27%	PLCE1/MYOZ2/EDN1/NFAT5/TBC1D10C/PPP3CB/LMCD1/FHL2/SLC9A1/EDN2/NFATC4/CHP2/EDN3/ITPR3/ATP2B4
GOBP_REGULATION_OF_CHROMATIN_ASSEMBLY	GOBP_REGULATION_OF_CHROMATIN_ASSEMBLY	18	-0.505668	-1.66099	0.0103268	0.0685741	0.0544867	11227	tags=61%, list=36%, signal=39%	SETDB2/SIRT6/TPR/SETDB1/PHF8/PARP10/PHF2/ATF7IP/AICDA/TET1/MPHOSPH8
GOCC_MICROVILLUS_MEMBRANE	GOCC_MICROVILLUS_MEMBRANE	24	-0.470967	-1.67628	0.0103731	0.0688101	0.0546741	4228	tags=33%, list=13%, signal=29%	PDZK1/PROM2/MSN/SLC7A5/PDPN/MUC20/CEACAM1/PROM1
GOBP_MUSCLE_ADAPTATION	GOBP_MUSCLE_ADAPTATION	105	-0.325997	-1.53997	0.0103936	0.0688754	0.054726	3354	tags=24%, list=11%, signal=21%	MYOZ2/EDN1/RGS4/PDE9A/GATA5/RGS2/CAMK2B/TNFRSF1A/LMCD1/SLC9A1/MIR21/IGFBP5/PAK1/LMNA/SGCA/FOXO1/ERRFI1/SMAD3/NOTCH1/ATP2B4/PPARGC1A/CFLAR/ACTA1/PRKCA/PI16
GOBP_COENZYME_A_METABOLIC_PROCESS	GOBP_COENZYME_A_METABOLIC_PROCESS	15	0.43242	1.83135	0.0105381	0.0697416	0.0554143	1741	tags=27%, list=6%, signal=25%	MCCC2/ACLY/PPCS/ACAT1
GOBP_RESPONSE_TO_PROSTAGLANDIN	GOBP_RESPONSE_TO_PROSTAGLANDIN	30	-0.444754	-1.68017	0.0105461	0.0697416	0.0554143	5404	tags=33%, list=17%, signal=28%	CCR7/SFRP1/AKAP8/EDN1/CCL19/OXT/GNRH1/TNC/CCL21/TGFBR3
GOBP_SIGNAL_TRANSDUCTION_IN_RESPONSE_TO_DNA_DAMAGE	GOBP_SIGNAL_TRANSDUCTION_IN_RESPONSE_TO_DNA_DAMAGE	119	0.175162	1.53914	0.0106182	0.0701345	0.0557265	3371	tags=24%, list=11%, signal=22%	AURKA/RPL26/ZMPSTE24/PSMD10/MIF/CDC25C/MYO6/BRCC3/CRADD/TFDP1/RBL2/CNOT7/PCNA/EEF1E1/CNOT8/MAD2L2/CNOT6/CDC5L/PRMT1/PTTG1IP/CDKN1B/PAXIP1/USP10/CNOT10/NBN/SIRT1/TRIAP1/CHEK1/SOX4
GOBP_EPITHELIAL_TUBE_BRANCHING_INVOLVED_IN_LUNG_MORPHOGENESIS	GOBP_EPITHELIAL_TUBE_BRANCHING_INVOLVED_IN_LUNG_MORPHOGENESIS	27	-0.454203	-1.67002	0.0106274	0.0701345	0.0557265	3809	tags=33%, list=12%, signal=29%	RSPO2/WNT2B/CELSR1/SPRY2/DLG5/SPRY1/SOX9/TNC/FOXF1
GOMF_QUINONE_BINDING	GOMF_QUINONE_BINDING	15	0.430036	1.82125	0.0106585	0.0702355	0.0558067	2629	tags=47%, list=8%, signal=43%	VKORC1L1/SDHD/SDHB/VKORC1/ETFDH/HSD17B8/CBR4
GOBP_LEARNING	GOBP_LEARNING	124	-0.301969	-1.45768	0.0106647	0.0702355	0.0558067	6048	tags=29%, list=19%, signal=24%	ARC/SLC6A1/LRRN4/PIAS1/NRXN2/HTT/MECP2/FYN/MEIS2/NF1/SORCS3/STRA6/GRIN2A/BTG2/SYT11/PPP3CB/ABCA7/ATP1A2/CREB1/NLGN3/NPAS4/GIT1/SRF/JUN/ADCY3/PTN/CIC/FOSL1/DLG4/MAP1A/SHANK3/EIF2AK4/CLDN5/BRSK1/FOS/CCK
GOBP_REGULATION_OF_RESPIRATORY_GASEOUS_EXCHANGE	GOBP_REGULATION_OF_RESPIRATORY_GASEOUS_EXCHANGE	19	-0.512988	-1.70989	0.0106863	0.0703057	0.0558625	11103	tags=68%, list=35%, signal=44%	ADORA1/PHOX2B/PHOX2A/PASK/TLX3/NLGN1/MECP2/ATP1A2/SLC5A3/NLGN3/NR4A2/NLGN2/TSHZ3
GOBP_REGULATION_OF_REACTIVE_OXYGEN_SPECIES_METABOLIC_PROCESS	GOBP_REGULATION_OF_REACTIVE_OXYGEN_SPECIES_METABOLIC_PROCESS	179	-0.284428	-1.41951	0.0108683	0.0713425	0.0566864	1699	tags=14%, list=5%, signal=13%	MIR21/SLC5A3/NOXA1/BMP7/FBLN5/BCL2/H19/ZC3H12A/ABCD1/CAV1/PON3/SMAD3/KLF2/GSTP1/ATP2B4/DUOXA1/IL10/CFLAR/CRYAB/PLIN5/LEP/CD177/PAGE4/PTGIS/TMEM106A
GOBP_CHROMATIN_REMODELING_AT_CENTROMERE	GOBP_CHROMATIN_REMODELING_AT_CENTROMERE	23	0.339442	1.72183	0.0108812	0.0713425	0.0566864	2593	tags=35%, list=8%, signal=32%	ITGB3BP/HJURP/CENPM/RUVBL1/CENPN/CENPA/OIP5/RBBP7
GOBP_POSITIVE_REGULATION_OF_NITRIC_OXIDE_SYNTHASE_ACTIVITY	GOBP_POSITIVE_REGULATION_OF_NITRIC_OXIDE_SYNTHASE_ACTIVITY	23	0.338802	1.71858	0.0108812	0.0713425	0.0566864	13205	tags=87%, list=42%, signal=50%	PIK3CB/APOE/HIF1A/CALM3/KRAS/SCARB1/HTR2B/NUS1/TERF2/GCH1/AKT1/DHFR/NPR3/TNF/AGTR2/FCER2/TERT/CALM1/NOD1/S100A1
GOBP_TRNA_THREONYLCARBAMOYLADENOSINE_METABOLIC_PROCESS	GOBP_TRNA_THREONYLCARBAMOYLADENOSINE_METABOLIC_PROCESS	14	0.432899	1.81675	0.0108884	0.0713425	0.0566864	3132	tags=36%, list=10%, signal=32%	LAGE3/HSD17B10/TPRKB/TP53RK/TRMT5
GOCC_SMALL_SUBUNIT_PROCESSOME	GOCC_SMALL_SUBUNIT_PROCESSOME	32	0.309136	1.70776	0.0110128	0.0720151	0.0572208	3630	tags=28%, list=12%, signal=25%	RPS7/HEATR1/XRCC5/IMP3/UTP18/KRR1/RRP9/UTP6/NGDN
GOMF_CHLORIDE_CHANNEL_REGULATOR_ACTIVITY	GOMF_CHLORIDE_CHANNEL_REGULATOR_ACTIVITY	15	-0.544015	-1.7061	0.0110135	0.0720151	0.0572208	1091	tags=27%, list=3%, signal=26%	CFTR/SGK1/WNK2/WNK4
GOBP_SYNCYTIUM_FORMATION	GOBP_SYNCYTIUM_FORMATION	46	-0.385208	-1.5855	0.0111142	0.072599	0.0576847	1041	tags=20%, list=3%, signal=19%	IL4R/MYOF/SBNO2/CFLAR/RAPGEF3/SH3PXD2A/CACNA1H/EHD2/SCGB3A1
GOBP_SUBSTRATE_ADHESION_DEPENDENT_CELL_SPREADING	GOBP_SUBSTRATE_ADHESION_DEPENDENT_CELL_SPREADING	100	-0.32029	-1.50149	0.0112091	0.0731447	0.0581183	3973	tags=21%, list=13%, signal=18%	APOA1/LAMA5/UNC13D/FGB/S100A10/CORO1C/GBP1/AXL/LAMC3/NTN4/FBLN1/LAMB3/PDPN/TYRO3/ACTN4/FERMT2/OLFM4/LIMS2/LAMB2/FLNA/ITGA8
GOBP_HEART_TRABECULA_FORMATION	GOBP_HEART_TRABECULA_FORMATION	12	-0.567567	-1.65812	0.011248	0.0732494	0.0582015	2213	tags=42%, list=7%, signal=39%	FHL2/RBP4/SRF/ADAMTS1/TGFBR3
GOBP_XENOBIOTIC_CATABOLIC_PROCESS	GOBP_XENOBIOTIC_CATABOLIC_PROCESS	12	-0.566686	-1.65554	0.011248	0.0732494	0.0582015	2776	tags=33%, list=9%, signal=30%	GSTM1/PON3/GSTM3/GSTM2
GOBP_NUCLEOBASE_CONTAINING_SMALL_MOLECULE_BIOSYNTHETIC_PROCESS	GOBP_NUCLEOBASE_CONTAINING_SMALL_MOLECULE_BIOSYNTHETIC_PROCESS	107	0.184561	1.51301	0.0112604	0.0732557	0.0582065	2318	tags=18%, list=7%, signal=17%	TK1/GMPS/HPRT1/DCTPP1/HINT1/ENTPD5/APRT/NME5/NUDT5/ENPP3/NME7/SMPDL3A/NUDT9/DUT/ACAT1/UCK2/NUDT11/ITPA/NME1
GOBP_NEGATIVE_REGULATION_OF_FATTY_ACID_OXIDATION	GOBP_NEGATIVE_REGULATION_OF_FATTY_ACID_OXIDATION	10	-0.609555	-1.67954	0.0112966	0.0734162	0.058334	1297	tags=30%, list=4%, signal=29%	SOX9/PLIN5/ACACB
GOBP_TERMINATION_OF_RNA_POLYMERASE_II_TRANSCRIPTION	GOBP_TERMINATION_OF_RNA_POLYMERASE_II_TRANSCRIPTION	32	0.308275	1.70301	0.0113482	0.0736771	0.0585413	3187	tags=34%, list=10%, signal=31%	SNRPF/SLBP/CSTF2T/TTF2/SNRPB/SNRPG/CPSF2/CPSF3/CLP1/LSM10/NCBP2
GOBP_POSITIVE_REGULATION_OF_TRANSCRIPTION_FROM_RNA_POLYMERASE_II_PROMOTER_IN_RESPONSE_TO_STRESS	GOBP_POSITIVE_REGULATION_OF_TRANSCRIPTION_FROM_RNA_POLYMERASE_II_PROMOTER_IN_RESPONSE_TO_STRESS	23	-0.478924	-1.69752	0.0113979	0.0737562	0.0586042	7417	tags=39%, list=24%, signal=30%	MAPK7/CREB3L1/DDIT3/CEBPB/VEGFA/SESN2/ATF3/KLF2/NOTCH1
GOBP_CELLULAR_AMINO_ACID_BIOSYNTHETIC_PROCESS	GOBP_CELLULAR_AMINO_ACID_BIOSYNTHETIC_PROCESS	70	0.216088	1.481	0.0114037	0.0737562	0.0586042	2403	tags=19%, list=8%, signal=17%	FOLH1/ENOPH1/APIP/BCAT1/ASNSD1/AASDHPPT/ADI1/PARK7/SHMT2/PYCR1/PSPH/PSAT1/BCAT2
GOMF_MHC_CLASS_II_PROTEIN_COMPLEX_BINDING	GOMF_MHC_CLASS_II_PROTEIN_COMPLEX_BINDING	16	0.411002	1.81923	0.0114098	0.0737562	0.0586042	3553	tags=38%, list=11%, signal=33%	HLA-DRB1/HSPA8/HLA-DRA/HSP90AB1/HSP90AA1/ATP1B1
GOMF_PURINE_RIBONUCLEOTIDE_TRANSMEMBRANE_TRANSPORTER_ACTIVITY	GOMF_PURINE_RIBONUCLEOTIDE_TRANSMEMBRANE_TRANSPORTER_ACTIVITY	16	0.41086	1.8186	0.0114098	0.0737562	0.0586042	2205	tags=38%, list=7%, signal=35%	SLC33A1/SLC25A5/SLC35B2/SLC35B3/SLC25A17/SLC25A4
GOCC_GOLGI_STACK	GOCC_GOLGI_STACK	128	0.170065	1.42479	0.0114288	0.0737562	0.0586042	2811	tags=20%, list=9%, signal=19%	BET1/TOM1L1/GOLPH3/TMED2/SAR1B/MGAT4A/TRAPPC4/TMBIM4/YIPF6/USO1/TMEM87A/GOLGA5/GPR89A/GOLPH3L/MGAT2/CANT1/ATL1/TMEM59/TMED3/NSF/B4GALT3/PSENEN/COG3/RAB21/GOSR1/OCRL
GOBP_KERATINOCYTE_PROLIFERATION	GOBP_KERATINOCYTE_PROLIFERATION	46	-0.384433	-1.58231	0.0114295	0.0737562	0.0586042	3674	tags=24%, list=12%, signal=21%	SNAI2/INTU/PPARD/FERMT1/MIR21/TGM1/CDH3/SFN/FST/ZFP36/TP63
GOBP_LIVER_MORPHOGENESIS	GOBP_LIVER_MORPHOGENESIS	22	-0.490265	-1.72294	0.0115017	0.0740997	0.0588771	2585	tags=36%, list=8%, signal=33%	CEBPB/SULF2/WNT3A/PTN/CFLAR/CEACAM1/LIMS2/IL6
GOBP_REGULATION_OF_DNA_BIOSYNTHETIC_PROCESS	GOBP_REGULATION_OF_DNA_BIOSYNTHETIC_PROCESS	98	0.181847	1.41912	0.0115075	0.0740997	0.0588771	2746	tags=21%, list=9%, signal=20%	MYC/PTGES3/CCT2/CCT8/TCP1/CCT7/XRCC5/CCT6A/RFC4/TFDP1/TINF2/PCNA/AURKB/HNRNPA1/HSP90AB1/CCT5/MAPKAPK5/DKC1/CCT3/CCT4/PARP4
GOBP_NEGATIVE_REGULATION_OF_CAMP_MEDIATED_SIGNALING	GOBP_NEGATIVE_REGULATION_OF_CAMP_MEDIATED_SIGNALING	14	-0.540407	-1.64756	0.0115289	0.0740997	0.0588771	3084	tags=43%, list=10%, signal=39%	RNF157/PDE2A/RGS2/MGRN1/LPAR1/CRTC3
GOBP_REGULATION_OF_PEROXISOME_PROLIFERATOR_ACTIVATED_RECEPTOR_SIGNALING_PATHWAY	GOBP_REGULATION_OF_PEROXISOME_PROLIFERATOR_ACTIVATED_RECEPTOR_SIGNALING_PATHWAY	14	-0.540961	-1.64925	0.0115289	0.0740997	0.0588771	4227	tags=36%, list=13%, signal=31%	MIR34A/LMO3/PLIN5/LEP/PTGIS
GOBP_MITOTIC_G1_S_TRANSITION_CHECKPOINT	GOBP_MITOTIC_G1_S_TRANSITION_CHECKPOINT	57	0.223293	1.44888	0.0115482	0.0741493	0.0589165	3932	tags=33%, list=13%, signal=29%	AURKA/RPL26/CDC25C/CRADD/TFDP1/RBL2/CNOT7/PCNA/CNOT8/CNOT6/PRMT1/CDKN1B/CNOT10/RPA2/TRIAP1/SOX4/GTSE1/RPS27L/EP300
GOMF_UBIQUITIN_LIKE_MODIFIER_ACTIVATING_ENZYME_ACTIVITY	GOMF_UBIQUITIN_LIKE_MODIFIER_ACTIVATING_ENZYME_ACTIVITY	10	0.522841	1.89341	0.0116817	0.0749137	0.0595239	3350	tags=60%, list=11%, signal=54%	UBA3/UBA5/UBA6/SAE1/UBA2/NAE1
GOBP_MESODERMAL_CELL_DIFFERENTIATION	GOBP_MESODERMAL_CELL_DIFFERENTIATION	30	-0.442762	-1.67264	0.0116907	0.0749137	0.0595239	3321	tags=30%, list=11%, signal=27%	FOXC2/SIX2/DKK1/KDM6B/ITGB4/WNT3A/ITGA3/FOXF1/ITGA8
GOCC_FIBRILLAR_COLLAGEN_TRIMER	GOCC_FIBRILLAR_COLLAGEN_TRIMER	12	-0.563	-1.64477	0.0117967	0.0755178	0.0600039	2722	tags=33%, list=9%, signal=30%	COL27A1/COL5A3/COL5A1/COL16A1
GOMF_OXIDOREDUCTASE_ACTIVITY_ACTING_ON_THE_ALDEHYDE_OR_OXO_GROUP_OF_DONORS	GOMF_OXIDOREDUCTASE_ACTIVITY_ACTING_ON_THE_ALDEHYDE_OR_OXO_GROUP_OF_DONORS	44	0.27635	1.62251	0.0119343	0.076322	0.0606429	3486	tags=34%, list=11%, signal=30%	ALDH3B2/ALDH1A3/DLD/AKR1C3/ALDH7A1/FMO5/DLAT/PDHX/ALDH1A1/PDHB/ALDH9A1/HSD17B12/ADH5/ALDH6A1/BCKDHB
GOBP_MULTICELLULAR_ORGANISM_AGING	GOBP_MULTICELLULAR_ORGANISM_AGING	30	-0.441445	-1.66767	0.0120177	0.0767788	0.0610058	302	tags=17%, list=1%, signal=17%	TFCP2L1/RNF165/CRYAB/LEP/TP63
GOCC_AXON_INITIAL_SEGMENT	GOCC_AXON_INITIAL_SEGMENT	15	-0.538676	-1.68936	0.0120708	0.0770417	0.0612147	2698	tags=33%, list=9%, signal=30%	SPTBN4/TRIM46/BIN1/MAP1A/CCK
GOBP_ENDOTHELIAL_CELL_MORPHOGENESIS	GOBP_ENDOTHELIAL_CELL_MORPHOGENESIS	11	-0.578084	-1.63389	0.0121279	0.0773287	0.0614428	2320	tags=36%, list=7%, signal=34%	NOTCH4/COL18A1/STC1/COL22A1
GOBP_CIRCADIAN_REGULATION_OF_GENE_EXPRESSION	GOBP_CIRCADIAN_REGULATION_OF_GENE_EXPRESSION	59	-0.361147	-1.55399	0.0121664	0.0774973	0.0615767	4060	tags=29%, list=13%, signal=25%	KDM5A/PER3/CLOCK/PER2/RAI1/MYCBP2/CRY2/PASD1/NGFR/PER1/CARTPT/AHR/ZFHX3/ID1/EGR1/PPARGC1A/HNRNPU
GOBP_PROTEIN_NEDDYLATION	GOBP_PROTEIN_NEDDYLATION	17	0.386075	1.7206	0.0121792	0.0775018	0.0615803	3350	tags=41%, list=11%, signal=37%	UBA3/DCUN1D5/RBX1/UBE2F/HIF1A/NEDD8/NAE1
GOBP_POSITIVE_REGULATION_OF_FILOPODIUM_ASSEMBLY	GOBP_POSITIVE_REGULATION_OF_FILOPODIUM_ASSEMBLY	24	-0.465252	-1.65594	0.0122284	0.0777374	0.0617675	6181	tags=42%, list=20%, signal=33%	NLGN1/CCR7/DNM3/ARAP1/AGRN/PALM/SRF/DPYSL3/CCL21/TGFB3
GOMF_NUCLEOTIDYLTRANSFERASE_ACTIVITY	GOMF_NUCLEOTIDYLTRANSFERASE_ACTIVITY	105	0.195163	1.6098	0.0122697	0.0779227	0.0619148	3092	tags=25%, list=10%, signal=22%	PTGES3/POLR3K/POLR2B/PAPSS1/NANS/NUDT5/UAP1/POLR2J3/POLE4/POLR2D/POLR2H/POLE3/POLR2J2/POLR2F/GMPPB/THG1L/PRIM1/POLR2L/POLR3E/DKC1/CMAS/POLR1C/POLR2I/POLR2G/CDS2/POLB
GOBP_OSTEOBLAST_DEVELOPMENT	GOBP_OSTEOBLAST_DEVELOPMENT	17	-0.524764	-1.7011	0.0123217	0.0781091	0.0620628	6179	tags=47%, list=20%, signal=38%	LRP5/ACHE/JUND/HOXA2/TNN/PTH1R/SMAD3/LRP5L
GOBP_NEGATIVE_REGULATION_OF_CELL_SUBSTRATE_ADHESION	GOBP_NEGATIVE_REGULATION_OF_CELL_SUBSTRATE_ADHESION	60	-0.365589	-1.57351	0.0123234	0.0781091	0.0620628	8476	tags=38%, list=27%, signal=28%	PIK3R1/PLG/GCNT2/ARHGAP6/MIR939/FZD7/MIR192/AJAP1/ACVRL1/JAG1/CORO1C/GBP1/CORO2B/LRP1/DLC1/FBLN1/ACTN4/NOTCH1/SEMA3E/BCL6/SERPINE1/CX3CL1/FAM107A
GOBP_POSITIVE_REGULATION_OF_UBIQUITIN_DEPENDENT_PROTEIN_CATABOLIC_PROCESS	GOBP_POSITIVE_REGULATION_OF_UBIQUITIN_DEPENDENT_PROTEIN_CATABOLIC_PROCESS	98	0.180384	1.4077	0.0123368	0.0781169	0.062069	3596	tags=23%, list=11%, signal=21%	CDC20/TRIB3/SUMO2/RNF144B/AURKA/PSMD10/RBX1/CEBPA/MAPK9/STUB1/TRIB1/UBQLN1/RNF14/MAGEF1/CCDC22/EGF/DDRGK1/VCP/UBQLN2/KEAP1/CSNK1A1/UBE2V2/BCAP31
GOBP_REGULATION_OF_CHOLESTEROL_METABOLIC_PROCESS	GOBP_REGULATION_OF_CHOLESTEROL_METABOLIC_PROCESS	60	0.230787	1.47959	0.0124424	0.0786472	0.0624904	3908	tags=33%, list=12%, signal=29%	SQLE/RAN/APOE/ARV1/FASN/TM7SF2/ACADL/FMO5/SOD1/KPNB1/DGAT2/SCD/PMVK/LPCAT3/ABCG1/ELOVL6/IDI1/GPAM/MVK/DHCR7
GOBP_PIGMENT_METABOLIC_PROCESS	GOBP_PIGMENT_METABOLIC_PROCESS	68	0.215993	1.47071	0.0124566	0.0786472	0.0624904	3153	tags=22%, list=10%, signal=20%	GMPS/PRPS1/HPRT1/WNT5A/PPAT/DDT/APRT/SLC25A39/HMBS/SHMT2/IREB2/TSPO/TMEM14C/GART/BLVRA
GOBP_PURINE_CONTAINING_COMPOUND_SALVAGE	GOBP_PURINE_CONTAINING_COMPOUND_SALVAGE	14	0.428066	1.79646	0.0124574	0.0786472	0.0624904	17959	tags=100%, list=57%, signal=43%	HPRT1/APRT/DCK/GMPR2/ADK/DGUOK/AMPD1/ADAL/MTAP/ADA/AMPD2/AMPD3/PRTFDC1/GMPR
GOBP_ACTIVATION_OF_MAPKKK_ACTIVITY	GOBP_ACTIVATION_OF_MAPKKK_ACTIVITY	11	-0.577027	-1.6309	0.0124982	0.0788231	0.0626302	158	tags=27%, list=1%, signal=27%	MAP4K5/GADD45B/GADD45G
GOBP_SYMPATHETIC_NERVOUS_SYSTEM_DEVELOPMENT	GOBP_SYMPATHETIC_NERVOUS_SYSTEM_DEVELOPMENT	21	-0.475017	-1.6429	0.0125099	0.0788231	0.0626302	10791	tags=67%, list=34%, signal=44%	GDNF/PHOX2B/PHOX2A/TFAP2B/FZD3/ASCL1/HAND2/NF1/SEMA3A/PLXNA4/GFRA3/GATA3/SEMA3F/TP63
GOBP_NEGATIVE_REGULATION_OF_EXTRACELLULAR_MATRIX_ORGANIZATION	GOBP_NEGATIVE_REGULATION_OF_EXTRACELLULAR_MATRIX_ORGANIZATION	12	-0.561077	-1.63916	0.0125283	0.0788617	0.0626608	5529	tags=42%, list=18%, signal=34%	ANTXR1/TNFRSF1B/TNFRSF1A/NOTCH1/EMILIN1
GOBP_NEURON_MATURATION	GOBP_NEURON_MATURATION	42	-0.398003	-1.61055	0.0127849	0.0803982	0.0638817	7506	tags=40%, list=24%, signal=31%	RET/KCNIP2/LRRK2/SCLT1/TBX6/MECP2/GLDN/CNTN2/BCL11A/SPTBN4/LGI4/PICK1/AGRN/BCL2/NTN4/NR4A2/CX3CL1
GOBP_POSITIVE_REGULATION_OF_VASCULAR_ASSOCIATED_SMOOTH_MUSCLE_CELL_PROLIFERATION	GOBP_POSITIVE_REGULATION_OF_VASCULAR_ASSOCIATED_SMOOTH_MUSCLE_CELL_PROLIFERATION	43	-0.397369	-1.61593	0.01293	0.0812309	0.0645433	5084	tags=65%, list=16%, signal=55%	ERN1/MEF2D/GNAI2/GJA1/MIR27B/MIR135B/LDLRAP1/MIR27A/MIR208A/MMP2/MIR448/MIR221/MIR26A1/MIR214/NR4A3/P2RY6/HTR1B/EDN1/MFN2/FGF2/FGF9/MIR21/IGFBP5/PAK1/JUN/FOXJ2/IL10/ADAMTS1
GOBP_EMBRYONIC_APPENDAGE_MORPHOGENESIS	GOBP_EMBRYONIC_APPENDAGE_MORPHOGENESIS	106	-0.316557	-1.49615	0.012973	0.0814214	0.0646947	4141	tags=33%, list=13%, signal=29%	PBX1/MSX1/ZNF358/SP8/FBXW4/TFAP2A/LRP5/HAND2/CREBBP/PRRX1/ALX4/RSPO2/INTU/PITX1/CRABP2/TBX3/FREM2/HOXD9/HOXD13/LRP4/BMP7/PBX2/CACNA1C/TBX2/ZBTB16/SALL4/GLI3/OSR1/MYH3/FBN2/ALDH1A2/NOTCH1/HOXD10/TP63/ROR2
GOBP_TRABECULA_FORMATION	GOBP_TRABECULA_FORMATION	21	-0.473564	-1.63788	0.0130204	0.081639	0.0648676	2213	tags=33%, list=7%, signal=31%	FHL2/RBP4/SRF/THBS3/FBN2/ADAMTS1/TGFBR3
GOBP_NEGATIVE_REGULATION_OF_VASCULAR_ASSOCIATED_SMOOTH_MUSCLE_CELL_PROLIFERATION	GOBP_NEGATIVE_REGULATION_OF_VASCULAR_ASSOCIATED_SMOOTH_MUSCLE_CELL_PROLIFERATION	35	-0.421109	-1.64517	0.0130406	0.0816857	0.0649047	14901	tags=74%, list=47%, signal=39%	PTEN/MIR424/MIR140/MIR223/MIR362/MIR137/MIR339/MIR503/MIR185/CDKN1A/MIR182/MIR15A/MIR1-1/PRKG1/MIR1298/MIR214/MIR34A/MIR638/MYOCD/TPM1/EFEMP2/ADIPOQ/GSTP1/IL10/TGFB3/CNN1
GOBP_PYRIMIDINE_RIBONUCLEOSIDE_METABOLIC_PROCESS	GOBP_PYRIMIDINE_RIBONUCLEOSIDE_METABOLIC_PROCESS	14	-0.537318	-1.63814	0.0131376	0.0822125	0.0653233	9632	tags=64%, list=31%, signal=45%	CDA/CDADC1/UPP2/UPP1/APOBEC3A/AICDA/APOBEC3D/APOBEC3F/APOBEC3C
GOBP_SODIUM_ION_HOMEOSTASIS	GOBP_SODIUM_ION_HOMEOSTASIS	53	-0.37497	-1.58499	0.0131636	0.0822384	0.0653439	5131	tags=30%, list=16%, signal=25%	CYP4F2/SCNN1B/ATP1A3/SLC12A3/EDN1/SLC12A1/OXT/ATP1A2/SLC9A1/ADORA2A/CYP4F12/MLLT6/SCNN1G/ATP6V1B1/C7/SCNN1A
GOMF_PROTEOGLYCAN_BINDING	GOMF_PROTEOGLYCAN_BINDING	34	-0.419854	-1.625	0.0131674	0.0822384	0.0653439	2135	tags=29%, list=7%, signal=27%	LRP1/COL5A3/AGRN/TNC/PTN/COL5A1/SLIT2/FST/PLA2G2D/CTSB
GOBP_PYRIMIDINE_RIBONUCLEOSIDE_TRIPHOSPHATE_BIOSYNTHETIC_PROCESS	GOBP_PYRIMIDINE_RIBONUCLEOSIDE_TRIPHOSPHATE_BIOSYNTHETIC_PROCESS	13	0.454883	1.80102	0.0132269	0.082524	0.0655708	11952	tags=92%, list=38%, signal=57%	NME5/NME7/UCK2/NME1/NME3/NME4/NME6/NME2/UCKL1/CTPS2/UCK1/CAD
GOBP_NEGATIVE_REGULATION_OF_REACTIVE_OXYGEN_SPECIES_BIOSYNTHETIC_PROCESS	GOBP_NEGATIVE_REGULATION_OF_REACTIVE_OXYGEN_SPECIES_BIOSYNTHETIC_PROCESS	33	-0.432013	-1.65641	0.0132389	0.082524	0.0655708	1699	tags=27%, list=5%, signal=26%	MIR21/ZC3H12A/ABCD1/CAV1/ATP2B4/IL10/CFLAR/PAGE4/PTGIS
GOCC_PROTON_TRANSPORTING_V_TYPE_ATPASE_COMPLEX	GOCC_PROTON_TRANSPORTING_V_TYPE_ATPASE_COMPLEX	26	0.320109	1.70202	0.0132559	0.0825498	0.0655913	3694	tags=46%, list=12%, signal=41%	ATP6V1A/ATP6V0B/ATP6V1G1/ATP6V0E2/ATP6V0E1/ATP6AP2/ATP6V0D1/ATP6V1D/CCDC115/ATP6V1F/ATP6V1B2/TMEM199
GOBP_POSITIVE_REGULATION_OF_FOCAL_ADHESION_ASSEMBLY	GOBP_POSITIVE_REGULATION_OF_FOCAL_ADHESION_ASSEMBLY	25	-0.455755	-1.63814	0.013304	0.0827691	0.0657655	4623	tags=32%, list=15%, signal=27%	SFRP1/EPB41L5/S100A10/VEGFA/PPM1F/SMAD3/FERMT2/COL16A1
GOBP_TOLL_LIKE_RECEPTOR_7_SIGNALING_PATHWAY	GOBP_TOLL_LIKE_RECEPTOR_7_SIGNALING_PATHWAY	10	0.519025	1.87959	0.0134123	0.0830698	0.0660044	15103	tags=100%, list=48%, signal=52%	TLR7/HAVCR2/SLC15A4/DDX3X/LILRA4/UNC93B1/PIK3AP1/TREML4/PTPN22/RSAD2
GOBP_DNA_SYNTHESIS_INVOLVED_IN_DNA_REPAIR	GOBP_DNA_SYNTHESIS_INVOLVED_IN_DNA_REPAIR	47	0.257399	1.52909	0.0134187	0.0830698	0.0660044	3393	tags=34%, list=11%, signal=30%	RPA3/UBB/RFC4/POLDIP2/PCNA/TRIM25/MAD2L2/RPS27A/RPA1/USP10/POLD2/VCP/RPA2/SIRT1/WRNIP1/RFC3
GOBP_ASTROCYTE_DEVELOPMENT	GOBP_ASTROCYTE_DEVELOPMENT	42	-0.397373	-1.608	0.0134202	0.0830698	0.0660044	3702	tags=26%, list=12%, signal=23%	SMO/NF1/ROR1/LRP1/ADORA2A/LAMC3/S100A8/DLL1/IL6/LAMB2/ROR2
GOBP_SYNAPTIC_VESICLE_BUDDING	GOBP_SYNAPTIC_VESICLE_BUDDING	11	-0.57427	-1.62311	0.013424	0.0830698	0.0660044	6421	tags=55%, list=20%, signal=43%	DNM1/DNM2/SLC2A4/DNM3/MX2/MX1
GOCC_INTEGRAL_COMPONENT_OF_PRESYNAPTIC_ACTIVE_ZONE_MEMBRANE	GOCC_INTEGRAL_COMPONENT_OF_PRESYNAPTIC_ACTIVE_ZONE_MEMBRANE	11	-0.574641	-1.62416	0.013424	0.0830698	0.0660044	4657	tags=45%, list=15%, signal=39%	CDH2/SYT11/CDH10/P2RX1/ATP2B4
GOBP_SPROUTING_ANGIOGENESIS	GOBP_SPROUTING_ANGIOGENESIS	162	-0.287386	-1.42534	0.0134301	0.0830698	0.0660044	10892	tags=44%, list=35%, signal=29%	HDAC5/MIR503/MIR27B/MIR206/THBS1/MIR23A/MIR375/MIR126/MIR30B/MIR30C1/MEOX2/MIR16-1/NRARP/PPP1R16B/MIR27A/MIR10A/MIR15A/MIR483/BMPER/RHOJ/SPRED1/MIR30E/MIR361/MIR138-1/MIR1224/MIR1-1/PTK2B/MIR487B/TDGF1/CREB3L1/MIR125A/MIR24-1/ACVRL1/EGR3/FBXW7/JMJD6/PGF/MIR494/MIR320A/MIR221/MIR26A1/MIR34A/YJEFN3/EPN2/FOXC2/CARD10/FGF2/NR4A1/EPHA2/VEGFA/MIR21/RNF213/NGFR/RAMP2/RSPO3/STARD13/ANGPT1/SRF/SEMA6A/DLL1…
GOBP_SIGNAL_TRANSDUCTION_INVOLVED_IN_CELL_CYCLE_CHECKPOINT	GOBP_SIGNAL_TRANSDUCTION_INVOLVED_IN_CELL_CYCLE_CHECKPOINT	68	0.214851	1.46293	0.0134531	0.0831317	0.0660536	3371	tags=26%, list=11%, signal=24%	AURKA/RPL26/CDC25C/BRCC3/CRADD/TFDP1/RBL2/CNOT7/PCNA/CNOT8/CNOT6/CDC5L/PRMT1/CDKN1B/CNOT10/TRIAP1/CHEK1/SOX4
GOCC_PROTON_TRANSPORTING_TWO_SECTOR_ATPASE_COMPLEX	GOCC_PROTON_TRANSPORTING_TWO_SECTOR_ATPASE_COMPLEX	29	0.317519	1.72814	0.0135059	0.0832605	0.0661559	3694	tags=45%, list=12%, signal=40%	ATP6V1A/ATP6V0B/ATP6V1G1/ATP6V0E2/ATP6V0E1/ATP6AP2/ATP6V0D1/ATP6V1E2/ATP6V1D/CCDC115/ATP6V1F/ATP6V1B2/TMEM199
GOBP_FORELIMB_MORPHOGENESIS	GOBP_FORELIMB_MORPHOGENESIS	35	-0.419067	-1.63719	0.0135207	0.0832605	0.0661559	4141	tags=34%, list=13%, signal=30%	ALX4/RSPO2/CRABP2/TBX3/HOXD9/CACNA1C/ZBTB16/OSR1/ALDH1A2/HOXD10/RNF165/TP63
GOBP_COGNITION	GOBP_COGNITION	261	-0.257916	-1.3304	0.0135259	0.0832605	0.0661559	3037	tags=17%, list=10%, signal=16%	SORCS3/PRRT1/NTF3/STRA6/NTF4/GRIN2A/BTG2/SYT11/PPP3CB/ABCA7/CEBPB/HTR2A/OXT/ATP1A2/DKK1/NFATC4/CREB1/NLGN3/NPAS4/GIT1/SRF/JUN/ADCY3/ITPR3/PTN/ITGA3/FZD9/CHRM1/CIC/PTCHD1/FOSL1/SERPINF1/SGK1/DLG4/MAP1A/SHANK3/EIF2AK4/CLDN5/BRSK1/FOS/FAM107A/SHROOM4/ITGA5/CCK/MAGT1
GOMF_OLFACTORY_RECEPTOR_ACTIVITY	GOMF_OLFACTORY_RECEPTOR_ACTIVITY	373	-0.247051	-1.31186	0.0135259	0.0832605	0.0661559	22023	tags=90%, list=70%, signal=27%	OR52B2/OR56A4/OR7A17/OR2T11/OR13A1/OR5T3/OR4E2/OR5B17/OR52D1/OR13D1/OR51Q1/OR52N2/OR2L3/OR6C4/OR2F2/OR51S1/OR1A2/OR51G2/OR6B3/OR4D6/OR8D4/OR2K2/OR5AU1/OR13J1/OR5H1/OR5D13/OR5B12/OR10G7/OR1G1/OR51E1/OR1L6/OR52A1/OR4D9/OR52I2/OR8D2/GPR148/OR5H6/OR6K3/OR4C16/OR11H12/OR10G8/OR9A4/OR5H2/OR13G1/OR14J1/OR2M5/OR8K1/OR4K1/OR10S1/OR10Z1/OR4P4/OR6Q1/OR8B4/OR4Q3/OR8B8/OR6C76/OR52N4/OR8U1/OR51A4/OR4C6/OR2M2/O…
GOMF_INTRAMOLECULAR_OXIDOREDUCTASE_ACTIVITY_TRANSPOSING_C_C_BONDS	GOMF_INTRAMOLECULAR_OXIDOREDUCTASE_ACTIVITY_TRANSPOSING_C_C_BONDS	12	0.462445	1.79367	0.0135863	0.0834718	0.0663239	3592	tags=58%, list=11%, signal=52%	EHHADH/MIF/DDT/EBPL/EBP/ECH1/IDI1
GOMF_NUCLEOTIDE_SUGAR_TRANSMEMBRANE_TRANSPORTER_ACTIVITY	GOMF_NUCLEOTIDE_SUGAR_TRANSMEMBRANE_TRANSPORTER_ACTIVITY	12	0.462704	1.79467	0.0135863	0.0834718	0.0663239	2478	tags=42%, list=8%, signal=38%	SLC35A3/SLC35B1/SLC35A5/SLC35E3/SLC35D2
GOBP_ER_NUCLEUS_SIGNALING_PATHWAY	GOBP_ER_NUCLEUS_SIGNALING_PATHWAY	50	0.248371	1.52074	0.0136604	0.0837873	0.0665746	3124	tags=24%, list=10%, signal=22%	XBP1/TMED2/NCK1/AGR2/TMCO1/EIF2A/EIF2AK3/CCDC47/TMEM33/HSP90B1/LPCAT3/INSIG2
GOMF_CHROMATIN_DNA_BINDING	GOMF_CHROMATIN_DNA_BINDING	83	-0.331395	-1.50566	0.0136638	0.0837873	0.0665746	6395	tags=28%, list=20%, signal=22%	FOXO3/VAX2/CREBBP/MYOD1/UTY/TOX2/NEUROG3/CLOCK/ZNF276/FOXC2/TOX/MBD3/RARA/PER1/KDM6B/SRF/SBNO2/ACTN4/SMAD3/NOTCH1/PPARGC1A/BCL6/HNRNPU
GOBP_NEURAL_CREST_CELL_DIFFERENTIATION	GOBP_NEURAL_CREST_CELL_DIFFERENTIATION	90	-0.325504	-1.50024	0.0136911	0.083874	0.0666435	6008	tags=30%, list=19%, signal=24%	HAND2/ANXA6/JAG1/SEMA7A/CDH2/SFRP1/SEMA5B/SMO/SNAI2/LAMA5/FOXC2/EDN1/CORO1C/SEMA3A/BMP7/EFNB1/SOX9/SEMA4C/SEMA6A/EDN3/SEMA3F/SEMA3B/ALDH1A2/ISL1/EDNRA/FOXC1/SEMA3E
GOBP_RESPONSE_TO_CORTICOSTERONE	GOBP_RESPONSE_TO_CORTICOSTERONE	20	-0.481546	-1.63986	0.0138112	0.0845295	0.0671643	4109	tags=35%, list=13%, signal=30%	NEFL/HSD3B1/NPAS4/MAOB/FOSL1/FOS/FOSB
GOBP_REGULATION_OF_MACROPHAGE_DIFFERENTIATION	GOBP_REGULATION_OF_MACROPHAGE_DIFFERENTIATION	21	-0.470589	-1.62758	0.0138714	0.084817	0.0673927	6526	tags=43%, list=21%, signal=34%	INHA/IL34/PF4/LIF/RIPK1/ZBTB46/ADIPOQ/PRKCA/ROR2
GOBP_AORTA_DEVELOPMENT	GOBP_AORTA_DEVELOPMENT	50	-0.372557	-1.55868	0.0139078	0.0849336	0.0674853	2864	tags=24%, list=9%, signal=22%	PDE2A/MIR205/LRP1/NGFR/PRICKLE1/TBX2/SRF/EFEMP2/NOTCH1/MYLK/ADAMTS9/LEP
GOMF_NADPH_BINDING	GOMF_NADPH_BINDING	13	0.452446	1.79137	0.013917	0.0849336	0.0674853	2629	tags=38%, list=8%, signal=35%	CBR3/QDPR/DECR1/GRHPR/CBR4
GOBP_NUCLEOLAR_LARGE_RRNA_TRANSCRIPTION_BY_RNA_POLYMERASE_I	GOBP_NUCLEOLAR_LARGE_RRNA_TRANSCRIPTION_BY_RNA_POLYMERASE_I	12	0.45873	1.77926	0.0139889	0.0852908	0.0677692	11288	tags=92%, list=36%, signal=59%	PWP1/TAF1B/PIH1D1/NCL/NOL11/IPPK/SIRT7/SMARCB1/SMARCA4/POLR1E/TCOF1
GOBP_POSITIVE_REGULATION_OF_PROTEOLYSIS_INVOLVED_IN_CELLULAR_PROTEIN_CATABOLIC_PROCESS	GOBP_POSITIVE_REGULATION_OF_PROTEOLYSIS_INVOLVED_IN_CELLULAR_PROTEIN_CATABOLIC_PROCESS	118	0.17842	1.55094	0.0140225	0.0854145	0.0678675	2342	tags=15%, list=7%, signal=14%	CDC20/PSMC4/TRIB3/SUMO2/RNF144B/AURKA/PSMD10/RBX1/CEBPA/MAPK9/STUB1/PSMC2/RNFT1/TRIB1/UBQLN1/RNF14/MAGEF1/CCDC22
GOBP_REGULATION_OF_FATTY_ACID_BETA_OXIDATION	GOBP_REGULATION_OF_FATTY_ACID_BETA_OXIDATION	17	-0.520847	-1.6884	0.0140694	0.0855078	0.0679416	2894	tags=29%, list=9%, signal=27%	ABCB11/IRS1/ABCD1/PLIN5/ACACB
GOMF_BETA_CATENIN_BINDING	GOMF_BETA_CATENIN_BINDING	80	-0.334117	-1.51117	0.0140834	0.0855078	0.0679416	2580	tags=22%, list=8%, signal=21%	MED12/CARM1/TCF7L2/BCL9L/TCF7L1/DLG5/FOXO4/TBL1X/SOX9/KDM6B/VCL/NR4A2/CHD8/GLI3/SETD1A/TCF4/FOXO1/SMAD3
GOBP_NEGATIVE_REGULATION_OF_HISTONE_ACETYLATION	GOBP_NEGATIVE_REGULATION_OF_HISTONE_ACETYLATION	16	0.403811	1.7874	0.0141029	0.0855078	0.0679416	12741	tags=88%, list=41%, signal=52%	TAF7/SET/SNCA/SIRT1/PIH1D1/CTBP1/SDR16C5/SIN3A/NOC2L/TWIST1/THAP7/SPI1/FOXP3/BRCA1
GOBP_UBIQUINONE_METABOLIC_PROCESS	GOBP_UBIQUINONE_METABOLIC_PROCESS	16	0.403874	1.78768	0.0141029	0.0855078	0.0679416	11098	tags=88%, list=35%, signal=57%	COQ2/COQ5/UBIAD1/COQ3/PDSS2/COQ10B/NDUFA9/PDSS1/COQ9/COQ7/COQ6/PPTC7/COQ4/FDXR
GOMF_CAMP_DEPENDENT_PROTEIN_KINASE_REGULATOR_ACTIVITY	GOMF_CAMP_DEPENDENT_PROTEIN_KINASE_REGULATOR_ACTIVITY	10	0.516824	1.87162	0.0141045	0.0855078	0.0679416	3913	tags=50%, list=12%, signal=44%	PRKAG1/PKIA/CXCL10/PRKAR1A/PKIB
GOMF_EXORIBONUCLEASE_ACTIVITY	GOMF_EXORIBONUCLEASE_ACTIVITY	37	0.277879	1.53538	0.014271	0.0864352	0.0686785	2986	tags=30%, list=10%, signal=27%	EXOSC5/EXOSC4/EXOSC3/CNOT7/CNOT8/REXO2/EXD2/CNOT6/EXOSC9/PDE12/XRN2
GOMF_3_5_EXONUCLEASE_ACTIVITY	GOMF_3_5_EXONUCLEASE_ACTIVITY	49	0.255557	1.53665	0.0143134	0.08661	0.0688174	2986	tags=29%, list=10%, signal=26%	EXOSC5/APEX1/TATDN1/EXOSC4/EXOSC3/CNOT7/CNOT8/APEX2/REXO2/EXD2/CNOT6/EXOSC9/PDE12/XRN2
GOBP_CARDIOLIPIN_METABOLIC_PROCESS	GOBP_CARDIOLIPIN_METABOLIC_PROCESS	17	0.381472	1.70009	0.0143322	0.0866422	0.068843	1305	tags=29%, list=4%, signal=28%	CRLS1/DNAJC19/LCLAT1/HADHB/PTPMT1
GOBP_POSITIVE_REGULATION_OF_SODIUM_ION_TRANSMEMBRANE_TRANSPORTER_ACTIVITY	GOBP_POSITIVE_REGULATION_OF_SODIUM_ION_TRANSMEMBRANE_TRANSPORTER_ACTIVITY	15	-0.533138	-1.67199	0.0143616	0.0867381	0.0689192	6180	tags=53%, list=20%, signal=43%	WNK3/DMD/DNM2/SLC9A1/ACTN4/DRD4/WNK2/WNK4
GOBP_REGULATION_OF_IRE1_MEDIATED_UNFOLDED_PROTEIN_RESPONSE	GOBP_REGULATION_OF_IRE1_MEDIATED_UNFOLDED_PROTEIN_RESPONSE	13	0.448929	1.77745	0.0143771	0.0867498	0.0689284	3160	tags=38%, list=10%, signal=35%	AGR2/COPS5/DNAJB9/TMEM33/DDRGK1
GOCC_CUL4_RING_E3_UBIQUITIN_LIGASE_COMPLEX	GOCC_CUL4_RING_E3_UBIQUITIN_LIGASE_COMPLEX	24	0.33307	1.71503	0.0145009	0.0874147	0.0694568	12990	tags=88%, list=41%, signal=51%	RBX1/DCAF6/TRPC4AP/PLRG1/CDKN1B/DCAF7/CRBN/CUL4A/CUL4B/DDA1/ARIH1/DET1/DCAF16/DTL/DCAF10/GLMN/ERCC8/FBXW5/DDB2/DDB1/DCAF12L2
GOMF_TRANSFORMING_GROWTH_FACTOR_BETA_ACTIVATED_RECEPTOR_ACTIVITY	GOMF_TRANSFORMING_GROWTH_FACTOR_BETA_ACTIVATED_RECEPTOR_ACTIVITY	12	-0.557029	-1.62733	0.0145401	0.0875152	0.0695366	312	tags=25%, list=1%, signal=25%	ACVRL1/LTBP4/TGFBR3
GOCC_AXONAL_GROWTH_CONE	GOCC_AXONAL_GROWTH_CONE	27	-0.444249	-1.63342	0.0145818	0.0875152	0.0695366	6474	tags=37%, list=21%, signal=29%	TAOK2/EPHA4/KIF5C/TIAM1/MAPK8IP1/LRP1/MYO9A/BOC/FLRT3/FLNA
GOBP_POSITIVE_REGULATION_OF_CHROMOSOME_SEPARATION	GOBP_POSITIVE_REGULATION_OF_CHROMOSOME_SEPARATION	17	0.379123	1.68962	0.0145859	0.0875152	0.0695366	2658	tags=41%, list=8%, signal=38%	NSMCE2/ANAPC7/MAD2L1BP/DLGAP5/ANAPC5/RB1/CDT1
GOBP_REGULATION_OF_MITOTIC_SPINDLE_ASSEMBLY	GOBP_REGULATION_OF_MITOTIC_SPINDLE_ASSEMBLY	17	0.379222	1.69006	0.0145859	0.0875152	0.0695366	2722	tags=41%, list=9%, signal=38%	CHMP5/CHMP2B/CHMP4C/CHMP1B/VPS4B/DRG1/CHMP2A
GOMF_RIBOSOMAL_SMALL_SUBUNIT_BINDING	GOMF_RIBOSOMAL_SMALL_SUBUNIT_BINDING	17	0.379776	1.69253	0.0145859	0.0875152	0.0695366	3580	tags=41%, list=11%, signal=37%	ABCE1/EIF1B/EIF4H/NME1/EIF4B/MTIF3/DHX29
GOBP_REGULATION_OF_CELL_MORPHOGENESIS_INVOLVED_IN_DIFFERENTIATION	GOBP_REGULATION_OF_CELL_MORPHOGENESIS_INVOLVED_IN_DIFFERENTIATION	88	-0.325194	-1.49223	0.0147921	0.0885979	0.0703969	5813	tags=27%, list=19%, signal=22%	PAK3/EPHA4/TIAM1/DNM2/APOA1/OBSL1/UNC13D/FGB/S100A10/CORO1C/GBP1/PARP6/CAMK2B/CAPRIN2/FBXO31/ITPKA/FBLN1/PDPN/EEF2K/ACTN4/FERMT2/OLFM4/LIMS2/FLNA
GOBP_TRANSFORMING_GROWTH_FACTOR_BETA1_PRODUCTION	GOBP_TRANSFORMING_GROWTH_FACTOR_BETA1_PRODUCTION	12	0.456101	1.76906	0.014794	0.0885979	0.0703969	2649	tags=42%, list=8%, signal=38%	CD2AP/TYROBP/FKBP1A/ATP6AP2/LUM
GOBP_EOSINOPHIL_CHEMOTAXIS	GOBP_EOSINOPHIL_CHEMOTAXIS	18	-0.489183	-1.60684	0.0148392	0.088786	0.0705464	9367	tags=61%, list=30%, signal=43%	DAPK2/HRH1/CCL24/CCL11/CCL1/SCG2/CCL2/CCL26/CCL5/CCL21/CX3CL1
GOBP_NEGATIVE_REGULATION_OF_VASCULATURE_DEVELOPMENT	GOBP_NEGATIVE_REGULATION_OF_VASCULATURE_DEVELOPMENT	127	-0.306691	-1.48477	0.0148852	0.0888887	0.0706279	11180	tags=48%, list=36%, signal=31%	PRL/MIR29A/MIR503/NPPB/MIR185/THBS1/ISM1/TNMD/MIR125B1/MIR375/PML/MIR30B/MIR30C1/MIR16-1/ROCK2/MIR10A/MIR15A/SPRED1/MIR30E/COL4A3/MIR361/MIR138-1/MIR505/MIR939/MIR487B/CREB3L1/MIR20B/MIR125A/MIR24-1/PF4/MIR494/MIR1298/MECP2/MIR221/MIR214/AMOT/MIR34A/YJEFN3/EPN2/MIR217/SPRY2/SPINK5/EPHA2/MIR21/STAB1/FOXO4/COL4A2/SEMA6A/FOXJ2/PTN/SYNJ2BP/KLF2/SERPINF1/FOXC1/SEMA3E/ATP2B4/ADAMTS1/EMILIN1/SERPINE1/CL…
GOBP_RESPONSE_TO_ANTIBIOTIC	GOBP_RESPONSE_TO_ANTIBIOTIC	40	0.266317	1.55492	0.014898	0.0888887	0.0706279	2228	tags=28%, list=7%, signal=26%	RSRC1/JAK1/ATP7A/CRIP1/GJB2/SOD1/ACTR2/VKORC1/PPP2CB/RPL23/CYB5R4
GOBP_RNA_PHOSPHODIESTER_BOND_HYDROLYSIS_EXONUCLEOLYTIC	GOBP_RNA_PHOSPHODIESTER_BOND_HYDROLYSIS_EXONUCLEOLYTIC	40	0.26669	1.5571	0.014898	0.0888887	0.0706279	2986	tags=28%, list=10%, signal=25%	EXOSC5/EXOSC4/EXOSC3/CNOT7/CNOT8/REXO2/EXD2/CNOT6/EXOSC9/PDE12/XRN2
GOBP_ALDEHYDE_CATABOLIC_PROCESS	GOBP_ALDEHYDE_CATABOLIC_PROCESS	11	0.47919	1.78687	0.0149859	0.0893025	0.0709567	3857	tags=64%, list=12%, signal=56%	PDXP/ESD/HAGH/AKR1A1/PARK7/ADH5/PNKD
GOBP_VERY_LOW_DENSITY_LIPOPROTEIN_PARTICLE_ASSEMBLY	GOBP_VERY_LOW_DENSITY_LIPOPROTEIN_PARTICLE_ASSEMBLY	12	0.453321	1.75828	0.0149952	0.0893025	0.0709567	3488	tags=50%, list=11%, signal=44%	APOC1/SOAT1/ACSL3/ARF1/LPCAT3/P4HB
GOBP_HINDLIMB_MORPHOGENESIS	GOBP_HINDLIMB_MORPHOGENESIS	34	-0.41584	-1.60947	0.0151061	0.0898793	0.0714151	4141	tags=29%, list=13%, signal=26%	ALX4/RSPO2/PITX1/TBX3/HOXD9/ZBTB16/OSR1/NOTCH1/HOXD10/TP63
GOBP_DETECTION_OF_STIMULUS_INVOLVED_IN_SENSORY_PERCEPTION	GOBP_DETECTION_OF_STIMULUS_INVOLVED_IN_SENSORY_PERCEPTION	471	-0.234294	-1.26073	0.0151699	0.0901753	0.0716503	21348	tags=84%, list=68%, signal=27%	OR6C4/OR2F2/OR51S1/OR1A2/OR51G2/OR6B3/RHO/TAS2R7/OR4D6/OR8D4/OR2K2/OR5AU1/OR13J1/OR5H1/OR5D13/OR5B12/OR10G7/OR1G1/OR51E1/OR1L6/TAS2R43/KCNA1/OR52A1/OR4D9/NTSR1/OR52I2/OR8D2/GPR148/OR5H6/OR6K3/OR4C16/OR11H12/OR10G8/OR9A4/OR5H2/OR13G1/OR14J1/OR2M5/OR8K1/OR4K1/OR10S1/OR10Z1/OR4P4/OR6Q1/OR8B4/OR4Q3/OR8B8/OR6C76/OR52N4/OR8U1/OR51A4/TAS2R5/OR4C6/OR2M2/OR8U8/OR4C46/OR2C3/OR5H14/OR2B2/MMP24/TAS2R31/OR6N2…
GOMF_BHLH_TRANSCRIPTION_FACTOR_BINDING	GOMF_BHLH_TRANSCRIPTION_FACTOR_BINDING	22	-0.478601	-1.68195	0.0152504	0.0905695	0.0719635	2213	tags=27%, list=7%, signal=25%	FHL2/KLF5/SOX9/IKZF4/SMAD3/ISL1
GOMF_LAMININ_BINDING	GOMF_LAMININ_BINDING	27	-0.442955	-1.62866	0.0154056	0.0914065	0.0726285	2294	tags=30%, list=7%, signal=27%	LRRC15/AGRN/NTN4/ITGA9/ITGA3/ECM1/SLIT2/GPC1
GOBP_REGULATION_OF_BLOOD_CIRCULATION	GOBP_REGULATION_OF_BLOOD_CIRCULATION	276	-0.254571	-1.3213	0.0154703	0.0917057	0.0728662	3498	tags=19%, list=11%, signal=17%	FGB/FXYD1/EDN1/RGS4/TBX18/CALCA/TMEM65/BDKRB2/KCNIP3/SEMA3A/SPTBN4/KCNH6/HTR2A/PER2/SLC4A3/RGS2/OXT/GNAO1/ATP1A2/SLC9A1/KCND1/SCN2B/EDN2/KCNA5/GJC1/NPR2/MIR21/TPM1/CACNA1C/P2RX1/TBX2/ZC3H12A/RNF207/BIN1/EDN3/ITPR3/HBEGF/CAV1/CD38/TRPC1/STC1/FXYD6/ISL1/KCNK3/ATP2B4/HSPB7/CHGA/CACNA1H/POPDC2/LEP/GSTM2/DES/FLNA
GOBP_PROXIMAL_DISTAL_PATTERN_FORMATION	GOBP_PROXIMAL_DISTAL_PATTERN_FORMATION	32	-0.431788	-1.65118	0.0155299	0.0919736	0.0730791	2260	tags=28%, list=7%, signal=26%	HOXD9/LRP4/PBX2/DLL1/GLI3/OSR1/ALDH1A2/HOXD10/TP63
GOBP_REGULATION_OF_RHO_PROTEIN_SIGNAL_TRANSDUCTION	GOBP_REGULATION_OF_RHO_PROTEIN_SIGNAL_TRANSDUCTION	73	-0.335861	-1.4959	0.0155486	0.0919996	0.0730997	2402	tags=22%, list=8%, signal=20%	GPR55/DLC1/KCTD10/ARHGEF10/GPR35/KANK2/AKAP13/STARD13/LPAR1/RASIP1/ITGA3/ARHGEF2/BCL6/MYO9B/CCDC125/STARD8
GOBP_ENDODERM_DEVELOPMENT	GOBP_ENDODERM_DEVELOPMENT	74	-0.345662	-1.53889	0.0155647	0.0920098	0.0731079	1241	tags=15%, list=4%, signal=14%	ITGA7/COL4A2/DUSP1/COL5A1/LAMB3/SMAD3/NOTCH1/ITGA5/DUSP5/COL6A1/COL7A1
GOBP_REGULATION_OF_CYTOKINESIS	GOBP_REGULATION_OF_CYTOKINESIS	86	0.193927	1.41616	0.0156506	0.0924148	0.0734296	3126	tags=23%, list=10%, signal=21%	ECT2/PDXP/AURKA/PRC1/CHMP4C/PIK3R4/BECN1/SH3GLB1/KLHL9/RACGAP1/AURKB/CALM2/KIF20A/CETN2/CDC42/KIF3B/NUP62/RHOA/CALM3/RAB11A
GOBP_CELLULAR_RESPONSE_TO_OXIDISED_LOW_DENSITY_LIPOPROTEIN_PARTICLE_STIMULUS	GOBP_CELLULAR_RESPONSE_TO_OXIDISED_LOW_DENSITY_LIPOPROTEIN_PARTICLE_STIMULUS	10	0.509178	1.84393	0.0156621	0.0924148	0.0734296	15412	tags=100%, list=49%, signal=51%	CD36/MYD88/CD68/AKT1/SMPD3/TLR6/MIA3/TLR4/TICAM1/MIR146A
GOBP_MESODERM_MORPHOGENESIS	GOBP_MESODERM_MORPHOGENESIS	65	-0.345403	-1.507	0.0156783	0.0924257	0.0734383	3321	tags=25%, list=11%, signal=22%	FOXC2/SIX2/TBX3/EPHA2/DKK1/TBX19/BMP7/KDM6B/SRF/ITGB4/WNT3A/ITGA3/SMAD3/FOXC1/FOXF1/ITGA8
GOBP_PHAGOSOME_ACIDIFICATION	GOBP_PHAGOSOME_ACIDIFICATION	27	0.300872	1.61826	0.0157802	0.0929409	0.0738477	3676	tags=41%, list=12%, signal=36%	ATP6V1A/ATP6V0B/ATP6V1G1/RAB20/ATP6V0E2/ATP6V0E1/ATP6V0D1/ATP6V1E2/ATP6V1D/ATP6V1F/ATP6V1B2
GOBP_DENDRITIC_CELL_APOPTOTIC_PROCESS	GOBP_DENDRITIC_CELL_APOPTOTIC_PROCESS	11	-0.569019	-1.60827	0.015831	0.0931541	0.0740171	9064	tags=64%, list=29%, signal=45%	BLK/GAS6/CCR7/CCL19/AXL/LILRB1/CCL21
GOBP_NEURON_PROJECTION_ORGANIZATION	GOBP_NEURON_PROJECTION_ORGANIZATION	85	-0.329032	-1.50196	0.0159319	0.093662	0.0744206	7202	tags=32%, list=23%, signal=25%	CUX2/LRRK2/ZNF365/NLGN1/ARC/PAK3/EPHA4/INS/TIAM1/FYN/ATP1A3/DNM3/HDAC6/PPFIA2/ZNF804A/CAMK2B/PICK1/CAPRIN2/EPHB1/ITPKA/ABCD1/ITGA3/EEF2K/DLG4/MAP1A/SHANK3/KIF1A
GOBP_MUSCLE_FIBER_DEVELOPMENT	GOBP_MUSCLE_FIBER_DEVELOPMENT	47	-0.375089	-1.54703	0.016035	0.0941816	0.0748335	2034	tags=19%, list=6%, signal=18%	P2RX2/VEGFA/BCL2/WFIKKN1/BIN3/ACTA1/LMOD3/MYH11/FLNC
GOBP_POSITIVE_REGULATION_OF_CHOLESTEROL_EFFLUX	GOBP_POSITIVE_REGULATION_OF_CHOLESTEROL_EFFLUX	21	-0.463753	-1.60394	0.016084	0.0943833	0.0749938	4604	tags=43%, list=15%, signal=37%	NFKBIA/APOA1/ABCA7/ABCA8/LRP1/ZDHHC8/ADIPOQ/CAV1/CES1
GOBP_REGULATION_OF_PROTEIN_EXIT_FROM_ENDOPLASMIC_RETICULUM	GOBP_REGULATION_OF_PROTEIN_EXIT_FROM_ENDOPLASMIC_RETICULUM	24	0.328273	1.69033	0.0162634	0.0953369	0.0757515	4676	tags=50%, list=15%, signal=43%	EDEM1/SAR1B/EDEM2/TMEM30B/DERL2/OS9/BCAP31/UBE2J1/YOD1/INSIG1/TM9SF4/SAR1A
GOCC_DESMOSOME	GOCC_DESMOSOME	24	-0.455799	-1.62229	0.0162763	0.0953369	0.0757515	5219	tags=33%, list=17%, signal=28%	DSG4/PPL/DSG3/PNN/PKP1/EVPL/DSC3/JAM3
GOBP_REGULATION_OF_TRANSLATION_NCRNA_MEDIATED	GOBP_REGULATION_OF_TRANSLATION_NCRNA_MEDIATED	69	-0.349476	-1.53616	0.0164443	0.0962327	0.0764632	18368	tags=84%, list=59%, signal=35%	MIR200C/MIR659/MIR29B1/MIRLET7E/MIR96/MIR132/MIR181B1/MIR148A/MIR222/MIR31/MIR346/MIR146A/MIR144/MIR15B/MIR200B/MIR212/MIR107/MIRLET7A1/MIR101-1/MIR106B/MIR134/MIR204/MIR590/MIR298/MIR877/MIR10B/MIR29A/MIR210/MIR503/MIR27B/MIR181A2/MIR218-1/MIR135B/MIR125B1/MIR9-1/MIR182/MIR16-1/MIR133B/MIR27A/TNRC6B/MIR208A/MIR15A/MIR483/MIR138-1/MIR939/MIR1-1/MIR181D/DDX6/MIR299/MIRLET7I/MIR221/TNRC6C/MIR205/NO…
GOBP_PLATELET_AGGREGATION	GOBP_PLATELET_AGGREGATION	59	-0.352589	-1.51717	0.016565	0.0968511	0.0769546	1374	tags=19%, list=4%, signal=18%	C1QTNF1/VCL/WNT3A/PDPN/TYRO3/CSRP1/TLN1/CEACAM1/PRKCA/MYL9/FLNA
GOMF_PEPTIDE_HORMONE_RECEPTOR_BINDING	GOMF_PEPTIDE_HORMONE_RECEPTOR_BINDING	21	-0.462931	-1.6011	0.0165946	0.0969357	0.0770218	2124	tags=24%, list=7%, signal=22%	GNAO1/UCN2/GNRH1/LEP/CCK
GOBP_ANDROGEN_METABOLIC_PROCESS	GOBP_ANDROGEN_METABOLIC_PROCESS	30	0.311441	1.70538	0.0166263	0.0969858	0.0770616	1031	tags=20%, list=3%, signal=19%	HSD17B6/HSD17B4/HSD17B11/SGPL1/HSD17B10/SPP1
GOBP_TRNA_MODIFICATION	GOBP_TRNA_MODIFICATION	70	0.209992	1.43921	0.0166335	0.0969858	0.0770616	16382	tags=89%, list=52%, signal=42%	TRMT112/HSD17B10/TPRKB/LCMT2/BCDIN3D/THUMPD3/THG1L/CDKAL1/KTI12/METTL6/FTSJ1/ELP4/TRMT5/TYW1/PUS7/NSUN2/DUS4L/TRMT12/ELP2/THUMPD1/DUS3L/PUSL1/METTL1/DUS1L/OSGEPL1/DPH3/OSGEP/C9orf64/CDK5RAP1/PUS3/MTFMT/MTO1/DTWD1/TYW1B/MOCS3/ALKBH8/URM1/NSUN3/TRDMT1/WDR4/TRMT11/ALKBH1/TARBP1/SSB/TRMT6/TRUB1/GTPBP3/TRIT1/TRMT2B/PUS10/QTRT1/METTL2A/NAT10/NSUN6/THUMPD2/THADA/ANKRD16/PUS1/METTL2B/METTL8/CTU2/TRMT1
GOBP_NEGATIVE_REGULATION_OF_ACTIN_FILAMENT_POLYMERIZATION	GOBP_NEGATIVE_REGULATION_OF_ACTIN_FILAMENT_POLYMERIZATION	56	-0.369076	-1.57595	0.0169161	0.0985437	0.0782995	5065	tags=30%, list=16%, signal=26%	HIP1R/KANK3/MIR214/SSH3/AVIL/SPTBN2/SPTBN1/SPTBN4/PFN4/SPTAN1/SVIL/VILL/SLIT2/FHOD3/KANK4/LMOD1/LMOD3
GOBP_RETINA_LAYER_FORMATION	GOBP_RETINA_LAYER_FORMATION	25	-0.446206	-1.60382	0.0169856	0.0988589	0.0785499	4963	tags=32%, list=16%, signal=27%	CRB1/OBSL1/MEGF11/SDK2/HIPK2/RDH13/AHI1/PROM1
GOBP_CD40_SIGNALING_PATHWAY	GOBP_CD40_SIGNALING_PATHWAY	15	-0.520975	-1.63384	0.0170048	0.098881	0.0785675	5732	tags=27%, list=18%, signal=22%	TNFAIP3/RNF31/CD40/ITGA5
GOCC_RUFFLE	GOCC_RUFFLE	165	-0.286648	-1.42288	0.0170233	0.0988983	0.0785812	5392	tags=25%, list=17%, signal=21%	MACF1/FGD4/TIAM1/DNM2/HIP1R/SPATA13/AMOT/LAYN/EPB41L5/PLEKHO1/PLCG1/ARFIP2/FGR/RASGRP2/SPRY2/CORO1C/PDE9A/ABCA7/FGD3/EPHA2/FERMT1/PDLIM7/DLC1/ADAM17/TPM1/FGD5/INPP5E/PALLD/PAK1/ASAP3/ARHGEF4/ARHGEF2/PDPN/PDE4A/ARAP3/TLN1/CSPG4/ACTN1/PIP5K1C/FAM107A/ITGA5
GOMF_NUCLEOBASE_CONTAINING_COMPOUND_KINASE_ACTIVITY	GOMF_NUCLEOBASE_CONTAINING_COMPOUND_KINASE_ACTIVITY	37	0.273923	1.51352	0.0170387	0.0988983	0.0785812	3843	tags=35%, list=12%, signal=31%	TK1/CMPK1/NME5/NME7/AK2/UCK2/NME1/CLP1/DCK/PNKP/GUK1/CASK/NME3
GOBP_NEGATIVE_REGULATION_OF_INCLUSION_BODY_ASSEMBLY	GOBP_NEGATIVE_REGULATION_OF_INCLUSION_BODY_ASSEMBLY	11	0.476624	1.77731	0.0170858	0.0990822	0.0787273	16434	tags=100%, list=52%, signal=48%	DNAJB6/DNAJA4/HSPA1B/HSPA1A/DNAJB8/HSPA2/HSF1/DNAJB1/DNAJB2/SACS/SORL1
GOBP_POSITIVE_REGULATION_OF_VIRAL_TRANSCRIPTION	GOBP_POSITIVE_REGULATION_OF_VIRAL_TRANSCRIPTION	22	0.333782	1.67654	0.0171737	0.0995017	0.0790607	3392	tags=41%, list=11%, signal=37%	POLR2B/POLR2D/POLR2H/POLR2F/SUPT4H1/POLR2L/POLR2I/POLR2G/POLR2K
GOMF_NITRIC_OXIDE_SYNTHASE_BINDING	GOMF_NITRIC_OXIDE_SYNTHASE_BINDING	14	-0.527318	-1.60766	0.0172486	0.0997808	0.0792824	6188	tags=43%, list=20%, signal=34%	NOS1AP/DMD/DNM2/DNM3/CAV1/ATP2B4
GOBP_ANTIBACTERIAL_HUMORAL_RESPONSE	GOBP_ANTIBACTERIAL_HUMORAL_RESPONSE	46	-0.372345	-1.53256	0.0172686	0.0997808	0.0792824	4191	tags=28%, list=13%, signal=25%	WFDC13/WFDC10A/FGB/SPINK5/ELANE/SFTPD/SEMG2/CTSG/WFDC2/DEFB1/SEMG1/TF/PGC
GOBP_DENDRITIC_SPINE_MORPHOGENESIS	GOBP_DENDRITIC_SPINE_MORPHOGENESIS	55	-0.358059	-1.52359	0.0172686	0.0997808	0.0792824	7202	tags=35%, list=23%, signal=27%	CUX2/LRRK2/ZNF365/NLGN1/ARC/PAK3/EPHA4/TIAM1/DNM3/HDAC6/PPFIA2/CAMK2B/CAPRIN2/EPHB1/ITPKA/EEF2K/DLG4/SHANK3/KIF1A
GOBP_G_PROTEIN_COUPLED_RECEPTOR_SIGNALING_PATHWAY_INVOLVED_IN_HEART_PROCESS	GOBP_G_PROTEIN_COUPLED_RECEPTOR_SIGNALING_PATHWAY_INVOLVED_IN_HEART_PROCESS	13	-0.551949	-1.65464	0.0173445	0.100129	0.0795592	7881	tags=62%, list=25%, signal=46%	MIR30E/MIR1-1/PLN/RGS2/AKAP13/CAV1/ATP2B4/CHGA
GOMF_ENDORIBONUCLEASE_ACTIVITY	GOMF_ENDORIBONUCLEASE_ACTIVITY	54	0.236369	1.51639	0.0173846	0.100271	0.0796716	3146	tags=26%, list=10%, signal=23%	LACTB2/APEX1/POP7/RPP40/RNASEH2A/TSNAX/POP4/RCL1/FEN1/CPSF3/RPP21/RNASEK/DBR1/TSEN34
GOBP_POSITIVE_REGULATION_OF_POTASSIUM_ION_TRANSMEMBRANE_TRANSPORT	GOBP_POSITIVE_REGULATION_OF_POTASSIUM_ION_TRANSMEMBRANE_TRANSPORT	38	-0.382422	-1.51582	0.0174154	0.100358	0.0797408	8128	tags=39%, list=26%, signal=29%	WNK3/KCNQ1/MIR1-1/KCNIP2/NOS1AP/DNM2/ANO6/NPPA/MIR21/RNF207/EDN3/WNK2/WNK4/KCNMB1/FLNA
GOBP_AXON_EXTENSION	GOBP_AXON_EXTENSION	112	-0.304418	-1.45128	0.0174646	0.100551	0.0798942	3503	tags=22%, list=11%, signal=20%	LIMK1/SLIT1/SEMA3A/PPP3CB/TRIM46/ULK2/LRP1/PLXNA4/VEGFA/SLIT3/RUFY3/ARHGAP4/PAK1/NLGN3/SEMA4C/VCL/SRF/SEMA6A/WNT3A/AUTS2/SEMA3F/SEMA3B/SLIT2/SEMA3E/LAMB2
GOBP_NEUTROPHIL_HOMEOSTASIS	GOBP_NEUTROPHIL_HOMEOSTASIS	13	-0.551512	-1.65333	0.0175224	0.100793	0.0800866	3405	tags=38%, list=11%, signal=34%	ITPKB/AXL/PIK3CD/JAM3/IL6
GOBP_RELAXATION_OF_CARDIAC_MUSCLE	GOBP_RELAXATION_OF_CARDIAC_MUSCLE	17	-0.513923	-1.66596	0.0175648	0.100903	0.0801743	4807	tags=29%, list=15%, signal=25%	PLN/RGS2/ATP1A2/CHGA/GSTM2
GOBP_NEURON_DEATH	GOBP_NEURON_DEATH	327	-0.248304	-1.30699	0.017573	0.100903	0.0801743	2861	tags=16%, list=9%, signal=15%	NTF3/CLCF1/NTF4/BTG2/POU4F1/GRIK5/AXL/CEBPB/KIR3DL2/MAP3K11/LRP1/SLC25A27/SULT1A4/SLC9A1/DKK1/WFS1/ADORA2A/NFATC4/ATN1/CREB1/EPHB1/SNCG/NGFR/BCL2/NRBP2/CCL5/MAP3K12/DDIT4/GATA3/ANGPT1/NR4A2/JUN/WNT3A/TYRO3/HIPK2/FZD9/ISL1/KCNB1/SERPINF1/EGR1/PPARGC1A/IL10/XRCC2/CHGA/CX3CL1/TGFB3/NES/FOXQ1/PPP1R13B/FAIM2/FOS/TP63
GOBP_QUINONE_METABOLIC_PROCESS	GOBP_QUINONE_METABOLIC_PROCESS	32	0.296414	1.63748	0.0176401	0.101198	0.0804082	3247	tags=34%, list=10%, signal=31%	COQ2/CBR3/AKR1C3/COQ5/AKR1A1/CYP4F11/UBIAD1/CBR4/COQ3/AKR7A2/PDSS2
GOMF_OXIDOREDUCTASE_ACTIVITY_ACTING_ON_PEROXIDE_AS_ACCEPTOR	GOMF_OXIDOREDUCTASE_ACTIVITY_ACTING_ON_PEROXIDE_AS_ACCEPTOR	56	-0.36809	-1.57173	0.0178646	0.102353	0.0813261	3819	tags=27%, list=12%, signal=24%	MPO/PTGES/GSTA1/HBA1/PTGS1/HBD/SESN2/CYGB/DUOX1/GPX8/HBA2/GSTP1/GPX2/GPX3/GSTM2
GOCC_APICAL_PART_OF_CELL	GOCC_APICAL_PART_OF_CELL	387	-0.242324	-1.28922	0.0178734	0.102353	0.0813261	4228	tags=19%, list=13%, signal=17%	PDZK1/INSC/TRPM6/SLC12A3/IL6R/PLD1/PARD6B/SLC16A3/ATP6V0D2/SLC4A11/CNTFR/FXYD1/UPK1B/SPTBN2/CD300LG/DUOXA2/PROM2/LHFPL5/NHS/ABCB11/AMN/AQP2/PRKG2/SLC12A1/LRP1/GJB6/SLC25A27/TCIRG1/P2RX2/SLC9A1/ITPK1/KCNA5/EDAR/MUC13/ADAM17/CEACAM6/SLC7A9/MSN/UPK1A/PTH1R/VANGL2/CLCA4/MAL/DUOX1/KCNMA1/CFTR/DLL1/CYP4F12/SHROOM1/ITPR3/SLC47A1/SLC7A5/PDPN/MPDZ/MUC20/DDR2/SLC4A5/STC1/NAALADL1/NOTCH1/BST2/CSPG4/SCNN1G/A…
GOMF_CARBOHYDRATE_DERIVATIVE_TRANSMEMBRANE_TRANSPORTER_ACTIVITY	GOMF_CARBOHYDRATE_DERIVATIVE_TRANSMEMBRANE_TRANSPORTER_ACTIVITY	50	0.242882	1.48713	0.018061	0.103335	0.0821061	2478	tags=24%, list=8%, signal=22%	SLC33A1/SLC35A3/SLC25A5/SLC37A1/SLC35B1/SLC35B2/SLC35B3/SLC25A17/SLC25A4/SLC35A5/SLC35E3/SLC35D2
GOMF_NUCLEAR_EXPORT_SIGNAL_RECEPTOR_ACTIVITY	GOMF_NUCLEAR_EXPORT_SIGNAL_RECEPTOR_ACTIVITY	10	0.504757	1.82792	0.0182614	0.104358	0.082919	8392	tags=90%, list=27%, signal=66%	RAN/XPO1/XPO7/CSE1L/EIF4ENIF1/XPO4/XPO6/XPO5/RANBP17
GOMF_L_ASCORBIC_ACID_BINDING	GOMF_L_ASCORBIC_ACID_BINDING	16	0.393266	1.74073	0.0182723	0.104358	0.082919	10512	tags=88%, list=33%, signal=58%	EGLN1/PHYH/P4HA1/P4HTM/ALKBH3/PLOD3/PAM/OGFOD1/PLOD2/DBH/P4HA2/EGLN3/OGFOD2/P4HA3
GOBP_DNA_CYTOSINE_DEAMINATION	GOBP_DNA_CYTOSINE_DEAMINATION	10	-0.590552	-1.62718	0.0183212	0.104458	0.0829987	3856	tags=50%, list=12%, signal=44%	APOBEC3A/AICDA/APOBEC3D/APOBEC3F/APOBEC3C
GOMF_TRANSFORMING_GROWTH_FACTOR_BETA_BINDING	GOMF_TRANSFORMING_GROWTH_FACTOR_BETA_BINDING	22	-0.469727	-1.65076	0.0183225	0.104458	0.0829987	1267	tags=23%, list=4%, signal=22%	WFIKKN1/SPINT3/LTBP4/TGFB3/TGFBR3
GOBP_POSITIVE_REGULATION_OF_SMOOTH_MUSCLE_CELL_MIGRATION	GOBP_POSITIVE_REGULATION_OF_SMOOTH_MUSCLE_CELL_MIGRATION	40	-0.391781	-1.56971	0.0183545	0.104547	0.0830696	6989	tags=38%, list=22%, signal=29%	MIR448/SEMA6D/MIR221/MIR26A1/NR4A3/FGF9/LRP1/MIR21/IGFBP5/BCL2/FOXO4/CCL5/PAK1/LPAR1/ADAMTS1
GOBP_POSITIVE_REGULATION_OF_CELL_ADHESION_MEDIATED_BY_INTEGRIN	GOBP_POSITIVE_REGULATION_OF_CELL_ADHESION_MEDIATED_BY_INTEGRIN	20	-0.471939	-1.60715	0.0184486	0.10499	0.0834214	7626	tags=45%, list=24%, signal=34%	CD3E/RET/ADAM9/LIF/CXCL13/FOXC2/FERMT1/CCL5/CCL21
GOBP_SENSORY_PERCEPTION_OF_CHEMICAL_STIMULUS	GOBP_SENSORY_PERCEPTION_OF_CHEMICAL_STIMULUS	458	-0.237256	-1.27366	0.0184742	0.105042	0.083463	21348	tags=84%, list=68%, signal=27%	OR6C4/OR2F2/OR51S1/OR1A2/OR51G2/OR6B3/TAS2R7/OR4D6/OR8D4/OR2K2/OR5AU1/WNT10B/OR13J1/OR5H1/OR5D13/OR5B12/OR10G7/TAAR5/OR1G1/OR51E1/OR1L6/TAS2R43/OR52A1/OR4D9/OR52I2/OR8D2/GPR148/OR5H6/OR6K3/OR4C16/OR11H12/OR10G8/OR9A4/OR5H2/OR13G1/UGT2A1/OR14J1/OR2M5/OR8K1/OR4K1/OR10S1/OR10Z1/OR4P4/CNGA2/OR6Q1/OR8B4/OR4Q3/OR8B8/OR6C76/OR52N4/OR8U1/OR51A4/TAS2R5/OR4C6/OR2M2/OR8U8/OR4C46/OR2C3/OR5H14/OR2B2/TAS2R31/O…
GOBP_REGULATION_OF_ENDOPLASMIC_RETICULUM_UNFOLDED_PROTEIN_RESPONSE	GOBP_REGULATION_OF_ENDOPLASMIC_RETICULUM_UNFOLDED_PROTEIN_RESPONSE	26	0.310634	1.65164	0.0185206	0.105085	0.083497	1387	tags=19%, list=4%, signal=18%	XBP1/NCK1/AGR2/COPS5/DNAJB9
GOBP_TETRAPYRROLE_BIOSYNTHETIC_PROCESS	GOBP_TETRAPYRROLE_BIOSYNTHETIC_PROCESS	26	0.310852	1.6528	0.0185206	0.105085	0.083497	10063	tags=81%, list=32%, signal=55%	SUCLA2/SLC25A39/HMBS/IREB2/TSPO/TMEM14C/UROD/UROS/SRRD/ABCB6/CPOX/FECH/PGRMC1/SLC25A38/RSAD1/PPOX/ALAS1/COX15/FXN/COX10/ALAD
GOBP_SARCOMERE_ORGANIZATION	GOBP_SARCOMERE_ORGANIZATION	37	-0.389249	-1.5444	0.0185359	0.105085	0.083497	8107	tags=43%, list=26%, signal=32%	MYPN/CFL2/MIR1-1/MYH6/CAPN3/KRT19/MYOZ2/EDN1/ANKRD1/TPM1/AKAP13/OBSCN/SRF/MYH3/FHOD3/CSRP1
GOMF_STRUCTURAL_CONSTITUENT_OF_SYNAPSE	GOMF_STRUCTURAL_CONSTITUENT_OF_SYNAPSE	16	-0.498248	-1.58372	0.0185505	0.105085	0.083497	5923	tags=50%, list=19%, signal=41%	INA/DNM3/NEFL/PCLO/SPTBN2/PPFIA2/ACTN1/NEFH
GOBP_PLASMA_MEMBRANE_REPAIR	GOBP_PLASMA_MEMBRANE_REPAIR	12	-0.548117	-1.6013	0.0185637	0.105085	0.083497	2758	tags=50%, list=9%, signal=46%	ANXA6/FER1L5/SYT11/DYSF/MYOF/SYTL4
GOBP_POSITIVE_REGULATION_OF_VACUOLE_ORGANIZATION	GOBP_POSITIVE_REGULATION_OF_VACUOLE_ORGANIZATION	12	0.44661	1.73225	0.0186182	0.1053	0.0836682	2969	tags=50%, list=9%, signal=45%	BECN1/SH3GLB1/GRN/PIP4K2A/RALB/PIP4K2C
GOBP_NEGATIVE_REGULATION_OF_PROTEIN_POLYMERIZATION	GOBP_NEGATIVE_REGULATION_OF_PROTEIN_POLYMERIZATION	69	-0.34521	-1.51741	0.0186368	0.105313	0.0836777	5065	tags=26%, list=16%, signal=22%	HIP1R/KANK3/MIR214/SSH3/AVIL/SPTBN2/SPTBN1/SPTBN4/PFN4/SPTAN1/SVIL/VILL/SLIT2/FHOD3/KANK4/LMOD1/LMOD3/CLIP3
GOBP_REGULATION_OF_APPETITE	GOBP_REGULATION_OF_APPETITE	22	-0.468655	-1.64699	0.018665	0.105324	0.0836866	1447	tags=23%, list=5%, signal=22%	CARTPT/SLC22A3/NPY/LEP/CCK
GOBP_ENERGY_HOMEOSTASIS	GOBP_ENERGY_HOMEOSTASIS	34	-0.411562	-1.59291	0.0186716	0.105324	0.0836866	4693	tags=29%, list=15%, signal=25%	NR4A3/IRX3/MLXIPL/CRTC1/EDN2/DLL1/CRTC3/FOXO1/PPARGC1A/ACACB
GOMF_LONG_CHAIN_FATTY_ACID_BINDING	GOMF_LONG_CHAIN_FATTY_ACID_BINDING	13	-0.548365	-1.6439	0.0187711	0.105792	0.0840585	7019	tags=46%, list=22%, signal=36%	GPR31/UCP1/PPARD/OXER1/FABP3/S100A8
GOBP_SEMAPHORIN_PLEXIN_SIGNALING_PATHWAY	GOBP_SEMAPHORIN_PLEXIN_SIGNALING_PATHWAY	40	-0.390277	-1.56369	0.0189929	0.106936	0.0849675	9003	tags=48%, list=29%, signal=34%	FARP2/NCAM1/PLXNB2/SH3BP1/SEMA6D/HAND2/PLXNC1/SEMA7A/SEMA5B/PLXNA1/SEMA3A/PLXNA4/SEMA4C/SEMA6A/SEMA3F/SEMA3B/SEMA3E/PLXNB1/FLNA
GOBP_GLUTATHIONE_DERIVATIVE_METABOLIC_PROCESS	GOBP_GLUTATHIONE_DERIVATIVE_METABOLIC_PROCESS	22	-0.46729	-1.6422	0.0190075	0.106936	0.0849675	7270	tags=41%, list=23%, signal=31%	GSTM4/GSTA2/HPGDS/GSTA1/GSTM1/GSTP1/GSTM5/GSTM3/GSTM2
GOBP_DIOL_METABOLIC_PROCESS	GOBP_DIOL_METABOLIC_PROCESS	25	0.309864	1.63689	0.0190321	0.10698	0.085003	10999	tags=76%, list=35%, signal=49%	PTS/PCBD1/QDPR/NAAA/SGPP1/SPTLC2/AGK/SPTLC1/GBA/GCH1/DEGS2/SGPP2/DHFR/ACER2/SPR/ASAH1/SPHK2/SPTLC3/ACER3
GOBP_MUSCLE_HYPERTROPHY	GOBP_MUSCLE_HYPERTROPHY	90	-0.31876	-1.46916	0.0192161	0.107808	0.0856608	3318	tags=23%, list=11%, signal=21%	EDN1/RGS4/PDE9A/GATA5/RGS2/TNFRSF1A/LMCD1/SLC9A1/MIR21/IGFBP5/PAK1/AKAP13/LMNA/FOXO1/ERRFI1/SMAD3/NOTCH1/ATP2B4/PRKCA/LEP/PI16
GOMF_EXONUCLEASE_ACTIVITY	GOMF_EXONUCLEASE_ACTIVITY	71	0.206745	1.42553	0.0192274	0.107808	0.0856608	2986	tags=25%, list=10%, signal=23%	EXOSC5/APEX1/TATDN1/EXOSC4/ENPP3/EXOSC3/CNOT7/CNOT8/APEX2/REXO2/EXD2/CNOT6/FEN1/EXOSC9/CPSF3/PDE12/DDX1/XRN2
GOBP_ACETYL_COA_BIOSYNTHETIC_PROCESS	GOBP_ACETYL_COA_BIOSYNTHETIC_PROCESS	20	0.337396	1.61252	0.0192299	0.107808	0.0856608	1985	tags=35%, list=6%, signal=33%	DLD/ACLY/PPCS/DLAT/PDHX/ACAT1/PDHB
GOBP_SMOOTH_MUSCLE_CELL_CHEMOTAXIS	GOBP_SMOOTH_MUSCLE_CELL_CHEMOTAXIS	10	-0.586022	-1.6147	0.0192705	0.107851	0.0856949	4227	tags=40%, list=13%, signal=35%	MIR34A/LPAR1/SLIT2/GSTP1
GOBP_RESPONSE_TO_COLD	GOBP_RESPONSE_TO_COLD	44	-0.386202	-1.57554	0.0192712	0.107851	0.0856949	4741	tags=30%, list=15%, signal=25%	CDH8/NFKBIA/TRPA1/UCP1/ACOT11/SLC25A27/SLC9A1/SLC27A1/ZNF516/FOXO1/PPARGC1A/EIF2AK4/FOS
GOCC_MICROFIBRIL	GOCC_MICROFIBRIL	12	-0.54446	-1.59061	0.0192989	0.107912	0.0857433	4910	tags=50%, list=16%, signal=42%	THSD4/MFAP5/EFEMP2/FBN2/MFAP4/LTBP4
GOBP_APOPTOTIC_PROCESS_INVOLVED_IN_MORPHOGENESIS	GOBP_APOPTOTIC_PROCESS_INVOLVED_IN_MORPHOGENESIS	22	-0.466681	-1.64006	0.0193499	0.108103	0.0858951	6179	tags=41%, list=20%, signal=33%	LRP5/HAND2/TNFRSF1B/FOXC2/TNFRSF1A/BMP7/NOTCH1/FOXC1/CRYAB
GOMF_LYSOPHOSPHATIDIC_ACID_ACYLTRANSFERASE_ACTIVITY	GOMF_LYSOPHOSPHATIDIC_ACID_ACYLTRANSFERASE_ACTIVITY	17	0.372914	1.66195	0.0194054	0.108319	0.0860665	714	tags=24%, list=2%, signal=23%	CRLS1/LCLAT1/AGPAT5/ABHD5
GOBP_NEGATIVE_REGULATION_OF_SINGLE_STRANDED_VIRAL_RNA_REPLICATION_VIA_DOUBLE_STRANDED_DNA_INTERMEDIATE	GOBP_NEGATIVE_REGULATION_OF_SINGLE_STRANDED_VIRAL_RNA_REPLICATION_VIA_DOUBLE_STRANDED_DNA_INTERMEDIATE	14	-0.523296	-1.59539	0.0195793	0.109194	0.0867619	6043	tags=50%, list=19%, signal=40%	SETDB1/APOBEC3A/AICDA/APOBEC3D/MPHOSPH8/APOBEC3F/APOBEC3C
GOBP_POSITIVE_REGULATION_OF_PROTEIN_ACETYLATION	GOBP_POSITIVE_REGULATION_OF_PROTEIN_ACETYLATION	42	-0.387427	-1.56776	0.0196313	0.109362	0.0868956	6481	tags=29%, list=21%, signal=23%	NOS1/KAT2A/ARRB1/LIF/MIR34A/MIR217/TAOK1/GATA3/AUTS2/ISL1/PPARGC1A/RAPGEF3
GOMF_MOLECULAR_CARRIER_ACTIVITY	GOMF_MOLECULAR_CARRIER_ACTIVITY	55	0.234284	1.52134	0.0196436	0.109362	0.0868956	2549	tags=24%, list=8%, signal=22%	RAN/COX17/SCO2/NDUFAB1/MB/SCO1/ATP7A/PARK7/OXA1L/KPNA1/IPO4/KPNB1/XPO1
GOBP_DEVELOPMENTAL_MATURATION	GOBP_DEVELOPMENTAL_MATURATION	245	-0.262483	-1.34782	0.0196757	0.109446	0.0869623	3250	tags=18%, list=10%, signal=17%	TCP11/CCL19/CNTN2/SPINK5/CEND1/BCL11A/SPTBN4/PCSK4/AXL/CAMK2B/FERMT1/LGI4/PICK1/VEGFA/TMEM79/NFATC4/CDC25B/AGRN/NPR2/PALM/RAB38/BCL2/PTH1R/GATA3/CDH3/NTN4/CFTR/NR4A2/THBS3/CATSPER2/ALDH1A2/SEMG2/KLF2/DLG4/REC8/PLXNB1/DEFB1/CCL21/DCHS1/DMC1/CX3CL1/TFCP2L1/SEMG1/PABPC1L/LEP
GOBP_ASPARTATE_FAMILY_AMINO_ACID_BIOSYNTHETIC_PROCESS	GOBP_ASPARTATE_FAMILY_AMINO_ACID_BIOSYNTHETIC_PROCESS	21	0.349337	1.70404	0.0197221	0.109609	0.0870914	1642	tags=24%, list=5%, signal=23%	ENOPH1/APIP/ASNSD1/AASDHPPT/ADI1
GOBP_NUCLEOTIDE_BINDING_DOMAIN_LEUCINE_RICH_REPEAT_CONTAINING_RECEPTOR_SIGNALING_PATHWAY	GOBP_NUCLEOTIDE_BINDING_DOMAIN_LEUCINE_RICH_REPEAT_CONTAINING_RECEPTOR_SIGNALING_PATHWAY	34	0.282908	1.61074	0.0197601	0.10963	0.0871083	15788	tags=91%, list=50%, signal=45%	UBB/RIPK2/UBE2N/IRAK1/RPS27A/RELA/SLC15A3/HSPA1B/UBC/SLC15A4/HSPA1A/BIRC2/ITCH/CYLD/NOD2/IKBKG/RNF34/CASP8/MAP3K7/TRAF6/UBA52/UBE2V1/TLR4/MAP2K6/NOD1/XIAP/IRAK2/PTPN22/SLC15A2/IRGM/SLC46A2
GOBP_REGULATION_OF_ENDOCRINE_PROCESS	GOBP_REGULATION_OF_ENDOCRINE_PROCESS	34	0.283204	1.61243	0.0197601	0.10963	0.0871083	1196	tags=18%, list=4%, signal=17%	OR51E2/F2RL1/BMP6/AGTR1/NKX3-1/GAL
GOBP_CYTIDINE_TO_URIDINE_EDITING	GOBP_CYTIDINE_TO_URIDINE_EDITING	12	-0.542237	-1.58412	0.0200341	0.111054	0.0882396	3856	tags=42%, list=12%, signal=37%	APOBEC3A/AICDA/APOBEC3D/APOBEC3F/APOBEC3C
GOBP_LYMPHANGIOGENESIS	GOBP_LYMPHANGIOGENESIS	17	-0.505929	-1.64004	0.0201985	0.111869	0.088887	3321	tags=35%, list=11%, signal=32%	FOXC2/PPP3CB/EPHA2/PDPN/FOXC1/CCBE1
GOBP_HEART_TRABECULA_MORPHOGENESIS	GOBP_HEART_TRABECULA_MORPHOGENESIS	29	-0.433116	-1.62158	0.0202327	0.11195	0.0889519	2213	tags=24%, list=7%, signal=22%	FHL2/BMP7/RBP4/SRF/NOTCH1/ADAMTS1/TGFBR3
GOBP_ENDODERMAL_CELL_DIFFERENTIATION	GOBP_ENDODERMAL_CELL_DIFFERENTIATION	43	-0.386959	-1.57359	0.0202482	0.11195	0.0889519	1974	tags=19%, list=6%, signal=17%	DKK1/ITGA7/COL4A2/COL5A1/LAMB3/ITGA5/COL6A1/COL7A1
GOBP_REGULATION_OF_TYPE_B_PANCREATIC_CELL_PROLIFERATION	GOBP_REGULATION_OF_TYPE_B_PANCREATIC_CELL_PROLIFERATION	11	-0.557213	-1.5749	0.020282	0.112041	0.0890236	10333	tags=64%, list=33%, signal=43%	PTPRN/NR1D1/NR4A3/SFRP1/NR4A1/WNT3A/ERRFI1
GOBP_PROTEIN_HOMOTETRAMERIZATION	GOBP_PROTEIN_HOMOTETRAMERIZATION	55	0.232474	1.50958	0.0203389	0.112258	0.0891965	2629	tags=24%, list=8%, signal=22%	TK1/TRPM4/HPRT1/APIP/ALDH1A3/GNMT/HSD17B10/B2M/SHMT2/ALDOA/THG1L/ALDH9A1/CBR4
GOBP_AMINO_SUGAR_METABOLIC_PROCESS	GOBP_AMINO_SUGAR_METABOLIC_PROCESS	39	0.268531	1.59224	0.0203585	0.112269	0.0892055	3357	tags=36%, list=11%, signal=32%	GFPT1/SLC35A3/PGM3/GNE/CTBS/UAP1/CMAS/MDP1/GNPDA1/DPAGT1/GNPDA2/GNPNAT1/NPL/EXTL2
GOBP_GLIAL_CELL_DEVELOPMENT	GOBP_GLIAL_CELL_DEVELOPMENT	107	-0.301637	-1.42876	0.0205225	0.113077	0.0898471	2580	tags=17%, list=8%, signal=15%	MED12/ROR1/LGI4/LRP1/PICK1/ARHGEF10/ADORA2A/LAMC3/S100A8/LPAR1/DLL1/ITGB4/CNTNAP1/GSTP1/IL6/LAMB2/ROR2/PRDM8
GOBP_AMINE_BIOSYNTHETIC_PROCESS	GOBP_AMINE_BIOSYNTHETIC_PROCESS	37	0.270684	1.49563	0.0206866	0.11374	0.0903743	2265	tags=22%, list=7%, signal=20%	DDC/SMS/AZIN1/GPR37/SAT1/SNCA/PARK7/SRM
GOBP_TETRAHYDROFOLATE_INTERCONVERSION	GOBP_TETRAHYDROFOLATE_INTERCONVERSION	10	0.496183	1.79687	0.0206961	0.11374	0.0903743	3343	tags=50%, list=11%, signal=45%	TYMS/MTHFS/MTHFD2/SHMT2/MTHFD1
GOBP_NEGATIVE_REGULATION_OF_VASCULAR_ASSOCIATED_SMOOTH_MUSCLE_CELL_MIGRATION	GOBP_NEGATIVE_REGULATION_OF_VASCULAR_ASSOCIATED_SMOOTH_MUSCLE_CELL_MIGRATION	21	-0.453097	-1.56709	0.0206962	0.11374	0.0903743	14894	tags=86%, list=47%, signal=45%	MIR424/MIR140/MIR223/MIR362/MIR137/MIR503/MIR218-1/MIR182/MIR15A/PRKG1/MIR1298/MIR214/MIR34A/MIR638/MYOCD/MIR21/TPM1/ADIPOQ
GOBP_CELLULAR_OXIDANT_DETOXIFICATION	GOBP_CELLULAR_OXIDANT_DETOXIFICATION	92	-0.329471	-1.52294	0.0207959	0.11419	0.0907317	3819	tags=24%, list=12%, signal=21%	MPO/TXNDC2/PTGES/GSTA1/HBA1/NXN/PTGS1/HBD/SESN2/MIR21/BMP7/CYGB/FBLN5/H19/DUOX1/SOD3/GPX8/HBA2/GSTP1/GPX2/GPX3/GSTM2
GOBP_NEGATIVE_REGULATION_OF_CELL_MATRIX_ADHESION	GOBP_NEGATIVE_REGULATION_OF_CELL_MATRIX_ADHESION	36	-0.392197	-1.54115	0.0209081	0.114708	0.0911431	8476	tags=39%, list=27%, signal=28%	PIK3R1/ARHGAP6/MIR939/MIR192/AJAP1/ACVRL1/JAG1/CORO1C/LRP1/DLC1/SEMA3E/BCL6/SERPINE1/FAM107A
GOMF_ENDONUCLEASE_ACTIVITY	GOMF_ENDONUCLEASE_ACTIVITY	105	0.186281	1.53654	0.0209544	0.114864	0.0912667	3243	tags=25%, list=10%, signal=22%	LACTB2/DNASE2B/APEX1/G3BP1/POP7/RPP40/TATDN1/RNASEH2A/PELO/TSNAX/POP4/RCL1/APEX2/RAD51C/ENDOD1/FEN1/CPSF3/RPS3/RPP21/RNASEK/SETMAR/RNASE6/PNKP/DBR1/TSEN34/ERCC1
GOBP_CARDIAC_CHAMBER_DEVELOPMENT	GOBP_CARDIAC_CHAMBER_DEVELOPMENT	143	-0.288016	-1.40793	0.021088	0.115497	0.0917701	3702	tags=22%, list=12%, signal=19%	SMO/MYBPC3/FOXC2/PPP1R13L/SMARCD3/TMEM65/PDE2A/STRA6/TBX3/POU4F1/ZFPM2/FHL2/PTK7/MYOCD/SLIT3/LUZP1/TPM1/BMP7/RBP4/TBX2/GATA3/SALL4/SRF/SLIT2/ISL1/NOTCH1/NPHP3/FOXC1/ADAMTS1/FOXF1/TGFBR3
GOBP_SENSORY_PERCEPTION_OF_SMELL	GOBP_SENSORY_PERCEPTION_OF_SMELL	395	-0.242833	-1.29273	0.0211777	0.115889	0.0920818	21348	tags=85%, list=68%, signal=28%	OR6C4/OR2F2/OR51S1/OR1A2/OR51G2/OR6B3/OR4D6/OR8D4/OR2K2/OR5AU1/OR13J1/OR5H1/OR5D13/OR5B12/OR10G7/OR1G1/OR51E1/OR1L6/OR52A1/OR4D9/OR52I2/OR8D2/GPR148/OR5H6/OR6K3/OR4C16/OR11H12/OR10G8/OR9A4/OR5H2/OR13G1/UGT2A1/OR14J1/OR2M5/OR8K1/OR4K1/OR10S1/OR10Z1/OR4P4/CNGA2/OR6Q1/OR8B4/OR4Q3/OR8B8/OR6C76/OR52N4/OR8U1/OR51A4/OR4C6/OR2M2/OR8U8/OR4C46/OR2C3/OR5H14/OR2B2/OR6N2/OR7D4/OR2F1/OR2T27/OR8D1/OR1L4/OR4K2/O…
GOBP_RESPONSE_TO_HYDROPEROXIDE	GOBP_RESPONSE_TO_HYDROPEROXIDE	16	-0.495369	-1.57457	0.0213772	0.116881	0.09287	1165	tags=19%, list=4%, signal=18%	RNF112/CD38/GPX3
GOCC_APICOLATERAL_PLASMA_MEMBRANE	GOCC_APICOLATERAL_PLASMA_MEMBRANE	19	0.347415	1.64494	0.0214069	0.116886	0.0928735	1393	tags=21%, list=4%, signal=20%	CLDN8/CLDN7/FZD6/CXADR
GOBP_REGULATION_OF_HEPATOCYTE_PROLIFERATION	GOBP_REGULATION_OF_HEPATOCYTE_PROLIFERATION	15	-0.512914	-1.60856	0.0214275	0.116886	0.0928735	2356	tags=53%, list=8%, signal=49%	FBXW7/TNFAIP3/SULF2/WNT3A/PTN/CFLAR/CEACAM1/LIMS2
GOBP_SYNAPTIC_VESICLE_LOCALIZATION	GOBP_SYNAPTIC_VESICLE_LOCALIZATION	47	-0.369561	-1.52423	0.0214327	0.116886	0.0928735	6848	tags=36%, list=22%, signal=28%	LRRK2/DNM1/NLGN1/KIF5A/KIF5C/DNM2/SLC2A4/CDH2/DNM3/PCLO/TRIM46/BRSK2/MX2/PCDH17/NLGN2/BRSK1/MX1
GOBP_ANIMAL_ORGAN_MATURATION	GOBP_ANIMAL_ORGAN_MATURATION	24	-0.445756	-1.58655	0.0215265	0.117298	0.0932007	1317	tags=62%, list=4%, signal=60%	PTH/SEMA4D/FGFR3/FAT4/XYLT1/RYR1/RET/LTF/PHOSPHO1/GATA3/THBS3/ALDH1A2/PLXNB1/DCHS1/LEP
GOBP_PROTEIN_INSERTION_INTO_MEMBRANE	GOBP_PROTEIN_INSERTION_INTO_MEMBRANE	59	0.220728	1.39823	0.0216232	0.117724	0.0935396	3918	tags=37%, list=12%, signal=33%	YWHAQ/PDCD5/TFDP1/TRAM1/YWHAZ/ROMO1/TRAM2/MOAP1/BAD/YWHAG/OXA1L/TIMM9/PPP3R1/AGK/HSP90AA1/HSPA4/YWHAB/TIMM10/TIMM8B/SAMM50/TOMM22/BCS1L
GOMF_FOLIC_ACID_BINDING	GOMF_FOLIC_ACID_BINDING	10	0.493188	1.78602	0.0217396	0.118258	0.0939635	3316	tags=60%, list=11%, signal=54%	GNMT/TYMS/FOLR2/MTHFS/SLC46A1/SLC19A1
GOBP_REGULATION_OF_OSTEOBLAST_DIFFERENTIATION	GOBP_REGULATION_OF_OSTEOBLAST_DIFFERENTIATION	116	-0.30127	-1.44166	0.0220204	0.119607	0.0950359	6508	tags=28%, list=21%, signal=23%	NPPC/LRP5/MIR20B/HAND2/LTF/JAG1/SMAD6/SFRP1/GDF10/IL6R/GDPD2/SNAI2/CEBPB/JUND/HOXA2/PDLIM7/TNN/TCIRG1/RORB/MIR21/IGFBP5/BMP7/SOX9/IFITM1/GLI3/FBN2/DDR2/SMAD3/NOTCH1/FERMT2/SMOC1/IL6/TP63
GOMF_CALCIUM_ACTIVATED_CATION_CHANNEL_ACTIVITY	GOMF_CALCIUM_ACTIVATED_CATION_CHANNEL_ACTIVITY	25	-0.440606	-1.58369	0.0220307	0.119607	0.0950359	5734	tags=44%, list=18%, signal=36%	TMEM63B/ANO1/ANO6/KCNMB3/CALHM1/KCNN3/KCNMA1/CATSPER2/KCNN4/TMEM63A/KCNMB1
GOBP_HISTAMINE_SECRETION	GOBP_HISTAMINE_SECRETION	11	0.469835	1.75199	0.0220624	0.119607	0.0950359	2542	tags=36%, list=8%, signal=33%	SNX4/VAMP7/SNAP23/LYN
GOCC_LOW_DENSITY_LIPOPROTEIN_PARTICLE	GOCC_LOW_DENSITY_LIPOPROTEIN_PARTICLE	11	0.46885	1.74832	0.0220624	0.119607	0.0950359	524	tags=27%, list=2%, signal=27%	PLA2G7/APOO/APOE
GOBP_AORTA_MORPHOGENESIS	GOBP_AORTA_MORPHOGENESIS	30	-0.421681	-1.593	0.0221823	0.120156	0.0954716	2561	tags=27%, list=8%, signal=25%	MIR205/LRP1/TBX2/SRF/EFEMP2/NOTCH1/MYLK/ADAMTS9
GOBP_VASCULAR_ASSOCIATED_SMOOTH_MUSCLE_CONTRACTION	GOBP_VASCULAR_ASSOCIATED_SMOOTH_MUSCLE_CONTRACTION	23	-0.45683	-1.61921	0.0222296	0.12031	0.0955944	3318	tags=39%, list=11%, signal=35%	SCNN1B/EDN1/HTR2A/EDN2/MIR21/P2RX1/EDN3/CD38/EDNRA
GOCC_NEUROMUSCULAR_JUNCTION	GOCC_NEUROMUSCULAR_JUNCTION	69	-0.342169	-1.50404	0.0223954	0.121075	0.0962021	6349	tags=29%, list=20%, signal=23%	SERPINE2/CHRNE/EPHA4/ACHE/EFNA2/FCHSD1/NEFL/DLGAP4/UNC13C/LAMA5/SYNGR1/MUSK/SV2A/LRP4/COL4A5/PTN/SYNJ2BP/DLG4/LAMB2/DES
GOBP_RESPONSE_TO_ACTIVITY	GOBP_RESPONSE_TO_ACTIVITY	64	-0.342073	-1.49052	0.0224421	0.121075	0.0962021	3318	tags=23%, list=11%, signal=21%	EDN1/PPARD/OXT/CRY2/CREB1/KDM6B/FNDC5/COL4A2/PTN/ADIPOQ/RARRES2/PPARGC1A/IL10/IL6/LEP
GOBP_MITOCHONDRIAL_CYTOCHROME_C_OXIDASE_ASSEMBLY	GOBP_MITOCHONDRIAL_CYTOCHROME_C_OXIDASE_ASSEMBLY	11	0.465728	1.73667	0.0224461	0.121075	0.0962021	2159	tags=55%, list=7%, signal=51%	COX17/SCO2/SCO1/OXA1L/FASTKD3/SURF1
GOBP_REGULATION_OF_PROTEIN_LOCALIZATION_TO_MEMBRANE	GOBP_REGULATION_OF_PROTEIN_LOCALIZATION_TO_MEMBRANE	174	-0.274732	-1.37182	0.0224465	0.121075	0.0962021	3150	tags=16%, list=10%, signal=15%	SPTBN1/IQSEC2/GZMB/EPHA3/GBP1/LRRC15/EPHA2/LRP1/STAC/LRP4/SLC5A3/BCL2/PAK1/GRIPAP1/SORBS1/ZDHHC8/WNT3A/PTN/ITGA3/FZD9/GPC1/KCNB1/SFN/ATP2B4/PPP1R13B/NKD2/TP63/CLIP3
GOMF_PHOSPHORUS_OXYGEN_LYASE_ACTIVITY	GOMF_PHOSPHORUS_OXYGEN_LYASE_ACTIVITY	19	-0.481865	-1.60615	0.0225258	0.121401	0.0964609	2965	tags=37%, list=9%, signal=33%	GUCY1A2/GUCY2F/ADCY5/NPR2/ADCY3/CD38/ADCY4
GOBP_BASE_EXCISION_REPAIR_AP_SITE_FORMATION	GOBP_BASE_EXCISION_REPAIR_AP_SITE_FORMATION	10	-0.580004	-1.59812	0.0227047	0.122262	0.0971451	7818	tags=50%, list=25%, signal=38%	MUTYH/NEIL2/TDG/NEIL1/MBD4
GOBP_SIGNAL_PEPTIDE_PROCESSING	GOBP_SIGNAL_PEPTIDE_PROCESSING	12	0.436801	1.6942	0.0228569	0.122978	0.0977143	2792	tags=50%, list=9%, signal=46%	SPCS1/SPCS3/IMMP2L/SPCS2/SEC11A/SEC11C
GOBP_OTIC_VESICLE_DEVELOPMENT	GOBP_OTIC_VESICLE_DEVELOPMENT	13	-0.536854	-1.60939	0.0230615	0.123921	0.0984631	2058	tags=31%, list=7%, signal=29%	CEP290/GATA3/SOX9/AHI1
GOBP_CELLULAR_RESPONSE_TO_POTASSIUM_ION	GOBP_CELLULAR_RESPONSE_TO_POTASSIUM_ION	10	-0.579265	-1.59608	0.0230863	0.123921	0.0984631	486	tags=40%, list=2%, signal=39%	CYP11B1/DLG4/PPARGC1A/CACNA1H
GOBP_TRANSCRIPTION_INITIATION_FROM_RNA_POLYMERASE_I_PROMOTER	GOBP_TRANSCRIPTION_INITIATION_FROM_RNA_POLYMERASE_I_PROMOTER	33	0.271231	1.54387	0.0230901	0.123921	0.0984631	3392	tags=36%, list=11%, signal=32%	GTF2H5/POLR2H/RRN3/POLR2F/MNAT1/POLR2L/CCNH/GTF2H3/POLR1C/TAF1B/PIH1D1/POLR2K
GOBP_RESPIRATORY_CHAIN_COMPLEX_IV_ASSEMBLY	GOBP_RESPIRATORY_CHAIN_COMPLEX_IV_ASSEMBLY	13	0.425462	1.68454	0.0231182	0.123932	0.0984723	2159	tags=46%, list=7%, signal=43%	COX17/SCO2/SCO1/OXA1L/FASTKD3/SURF1
GOCC_AUTOLYSOSOME	GOCC_AUTOLYSOSOME	10	0.488713	1.76982	0.0231309	0.123932	0.0984723	3516	tags=40%, list=11%, signal=36%	LAMP2/FTL/FTH1/NCOA4
GOBP_GERMINAL_CENTER_FORMATION	GOBP_GERMINAL_CENTER_FORMATION	14	-0.519065	-1.58249	0.0231717	0.124047	0.0985636	5732	tags=50%, list=18%, signal=41%	TNFAIP3/CXCL13/UNC13D/NFKB2/ADAM17/BCL3/BCL6
GOMF_ACID_THIOL_LIGASE_ACTIVITY	GOMF_ACID_THIOL_LIGASE_ACTIVITY	30	0.301495	1.65092	0.0232004	0.124063	0.0985764	1807	tags=23%, list=6%, signal=22%	SLC27A2/ACSM1/ACSL1/AACS/SUCLG2/SUCLA2/ACSL3
GOMF_RIBONUCLEASE_P_ACTIVITY	GOMF_RIBONUCLEASE_P_ACTIVITY	11	0.463759	1.72933	0.0232134	0.124063	0.0985764	2734	tags=36%, list=9%, signal=33%	POP7/RPP40/POP4/RPP21
GOBP_REGULATION_OF_MITOCHONDRIAL_MEMBRANE_PERMEABILITY	GOBP_REGULATION_OF_MITOCHONDRIAL_MEMBRANE_PERMEABILITY	68	0.204582	1.39301	0.023434	0.125089	0.0993918	1787	tags=18%, list=6%, signal=17%	TMEM14A/HEBP2/SLC25A5/YWHAQ/TFDP1/DYNLT1/ALKBH7/YWHAZ/BNIP3/MOAP1/BAD/YWHAG
GOBP_REGULATION_OF_DENDRITIC_SPINE_MORPHOGENESIS	GOBP_REGULATION_OF_DENDRITIC_SPINE_MORPHOGENESIS	40	-0.384549	-1.54074	0.0234617	0.125089	0.0993918	7202	tags=38%, list=23%, signal=29%	CUX2/LRRK2/NLGN1/ARC/PAK3/EPHA4/TIAM1/DNM3/PPFIA2/CAMK2B/CAPRIN2/ITPKA/EEF2K/SHANK3/KIF1A
GOCC_TRANSCRIPTIONALLY_ACTIVE_CHROMATIN	GOCC_TRANSCRIPTIONALLY_ACTIVE_CHROMATIN	17	0.364267	1.62341	0.023464	0.125089	0.0993918	2520	tags=35%, list=8%, signal=32%	EXOSC5/EXOSC4/WDR61/EXOSC3/TTC37/AFF4
GOBP_HISTONE_H3_K27_METHYLATION	GOBP_HISTONE_H3_K27_METHYLATION	15	-0.504594	-1.58247	0.0235525	0.125457	0.0996838	10707	tags=60%, list=34%, signal=40%	OGT/EHMT2/EZH1/EHMT1/PHF1/SUPT6H/CHD5/GATA3/MTF2
GOBP_POSITIVE_REGULATION_OF_VASCULAR_ASSOCIATED_SMOOTH_MUSCLE_CELL_MIGRATION	GOBP_POSITIVE_REGULATION_OF_VASCULAR_ASSOCIATED_SMOOTH_MUSCLE_CELL_MIGRATION	19	-0.480125	-1.60035	0.0235735	0.125464	0.0996897	5084	tags=63%, list=16%, signal=53%	MIR135B/DOCK5/MIR448/MIR221/MIR26A1/NR4A3/FGF9/LRP1/MIR21/IGFBP5/PAK1/ADAMTS1
GOBP_RECEPTOR_CLUSTERING	GOBP_RECEPTOR_CLUSTERING	49	-0.363109	-1.51433	0.0238219	0.126681	0.100657	2602	tags=20%, list=8%, signal=19%	GRIK5/PICK1/AGRN/LRP4/PTN/FZD9/SYNJ2BP/DLG4/SHANK3/FLNA
GOCC_TRICARBOXYLIC_ACID_CYCLE_ENZYME_COMPLEX	GOCC_TRICARBOXYLIC_ACID_CYCLE_ENZYME_COMPLEX	14	0.407214	1.70895	0.0241355	0.128243	0.101897	3486	tags=43%, list=11%, signal=38%	SUCLG2/DLD/SUCLA2/FH/SUCLG1/BCKDHB
GOBP_LEUKOCYTE_MIGRATION_INVOLVED_IN_INFLAMMATORY_RESPONSE	GOBP_LEUKOCYTE_MIGRATION_INVOLVED_IN_INFLAMMATORY_RESPONSE	18	-0.469923	-1.54357	0.0242438	0.128711	0.10227	2704	tags=33%, list=9%, signal=30%	SELE/ELANE/S100A8/PTN/JAM3/CX3CL1
GOBP_POSITIVE_REGULATION_OF_POTASSIUM_ION_TRANSPORT	GOBP_POSITIVE_REGULATION_OF_POTASSIUM_ION_TRANSPORT	45	-0.372803	-1.52829	0.0243418	0.129102	0.10258	11586	tags=49%, list=37%, signal=31%	LRRC38/DLG1/ATP1B2/ADORA1/ANK2/WNK1/WNK3/KCNQ1/MIR1-1/KCNIP2/NOS1AP/DNM2/ANO6/NPPA/MIR21/RNF207/EDN3/FHL1/WNK2/WNK4/KCNMB1/FLNA
GOMF_LYSOPHOSPHOLIPID_ACYLTRANSFERASE_ACTIVITY	GOMF_LYSOPHOSPHOLIPID_ACYLTRANSFERASE_ACTIVITY	20	0.329047	1.57262	0.0243577	0.129102	0.10258	714	tags=20%, list=2%, signal=20%	CRLS1/LCLAT1/AGPAT5/ABHD5
GOBP_POSITIVE_REGULATION_OF_MITOCHONDRIAL_FISSION	GOBP_POSITIVE_REGULATION_OF_MITOCHONDRIAL_FISSION	12	0.430149	1.6684	0.024475	0.129512	0.102906	9108	tags=83%, list=29%, signal=59%	BNIP3/VPS35/DCN/FIS1/PINK1/MFF/DNM1L/DDHD2/MUL1/KDR
GOCC_PLATELET_DENSE_GRANULE_LUMEN	GOCC_PLATELET_DENSE_GRANULE_LUMEN	13	-0.534345	-1.60187	0.0244917	0.129512	0.102906	3159	tags=46%, list=10%, signal=42%	TIMP3/ITIH4/ECM1/CLEC3B/RARRES2/LGALS3BP
GOBP_REGULATION_OF_GENE_SILENCING_BY_RNA	GOBP_REGULATION_OF_GENE_SILENCING_BY_RNA	87	0.187822	1.36563	0.0244958	0.129512	0.102906	2918	tags=23%, list=9%, signal=21%	PPP3CA/MAP2K1/ZMPSTE24/NUP37/POLR2B/SEH1L/POLR2D/POLR2H/SEC13/BCDIN3D/POLR2F/NUP54/POLR2L/NUP205/NUP35/NUP62/POLR2I/NUP88/POLR2G/NUP153
GOBP_PRODUCTION_OF_SMALL_RNA_INVOLVED_IN_GENE_SILENCING_BY_RNA	GOBP_PRODUCTION_OF_SMALL_RNA_INVOLVED_IN_GENE_SILENCING_BY_RNA	45	-0.372513	-1.5271	0.02466	0.130273	0.10351	2610	tags=22%, list=8%, signal=20%	RIPK1/NCOR2/MYOCD/RMRP/DGCR8/H19/ZC3H12A/SMAD3/HNRNPA2B1/IL6
GOBP_DNA_DAMAGE_RESPONSE_SIGNAL_TRANSDUCTION_BY_P53_CLASS_MEDIATOR	GOBP_DNA_DAMAGE_RESPONSE_SIGNAL_TRANSDUCTION_BY_P53_CLASS_MEDIATOR	97	0.186016	1.40286	0.0248504	0.131171	0.104224	3632	tags=28%, list=12%, signal=25%	AURKA/RPL26/ZMPSTE24/PSMD10/MIF/CDC25C/MYO6/CRADD/TFDP1/RBL2/CNOT7/PCNA/EEF1E1/CNOT8/CNOT6/PRMT1/PTTG1IP/CDKN1B/PAXIP1/USP10/CNOT10/NBN/SIRT1/TRIAP1/SOX4/PPM1D/GTSE1
GOMF_HEAT_SHOCK_PROTEIN_BINDING	GOMF_HEAT_SHOCK_PROTEIN_BINDING	109	0.183596	1.46348	0.0248982	0.13126	0.104295	2985	tags=25%, list=10%, signal=22%	PTGES3/PDXP/HSPA8/TELO2/GPR37/DNAJB9/STUB1/HSPA14/DNAJB6/SNCA/DNAJC10/EIF2AK3/IRAK1/CSNK2A1/DNAJA1/HSP90AB1/HSPA9/SLC12A2/RPS3/HIF1A/ITGB2/DNAJA4/NUP62/DNAJA3/CDK5/PPP5C/IQCG
GOBP_NEGATIVE_REGULATION_OF_CELL_ADHESION	GOBP_NEGATIVE_REGULATION_OF_CELL_ADHESION	278	-0.253529	-1.3163	0.024975	0.13126	0.104295	3033	tags=17%, list=10%, signal=16%	CORO1C/PLXNA1/GBP1/CD80/CEBPB/CORO2B/NOTCH4/LRP1/DLC1/PLXNA4/IRF1/LAX1/VEGFA/PPM1F/MIR21/DLG5/LILRB1/SOCS1/GNRH1/C1QTNF1/ZC3H12A/SFTPD/TNC/ANGPT1/FBLN1/SEMA6A/IL4R/GLI3/VTCN1/DUSP1/ADIPOQ/SPN/ACTN4/NOTCH1/JAM3/LAG3/SEMA3E/IL10/BCL6/PLXNB1/PLA2G2D/SERPINE1/CCL21/AKNA/CX3CL1/CEACAM1/FAM107A/SCGB1A1
GOBP_POSITIVE_REGULATION_OF_CELL_PROJECTION_ORGANIZATION	GOBP_POSITIVE_REGULATION_OF_CELL_PROJECTION_ORGANIZATION	313	-0.248406	-1.30247	0.024975	0.13126	0.104295	6494	tags=26%, list=21%, signal=21%	CCDC88A/RAPGEF1/ANAPC2/KAT2A/NLGN1/CAMK1D/EPS8L2/PAK3/EPHA4/INS/CCR7/MACF1/DVL2/PLXNC1/FUT9/HTT/TIAM1/DNM2/MIR221/FYN/SEMA7A/CDC42EP4/DNM3/NEFL/AVIL/SF3A2/OBSL1/RP1/CRTC1/LIMK1/PLCE1/TOX/CCL19/CRABP2/CORO1C/PROM2/PLXNA1/EPHA3/ANKRD1/CROCC/ARAP1/ZNF804A/PARP6/RGS2/CAMK2B/ROR1/PTK7/LRP1/PLXNA4/VEGFA/KCTD17/CAPRIN2/FBXO31/RUFY3/AGRN/MIR21/BMP7/NGFR/ITPKA/PALM/PAK1/SRF/WNT3A/PTN/ITGA3/AUTS2/EEF2K/DPY…
GOBP_REGULATION_OF_CELL_MORPHOGENESIS	GOBP_REGULATION_OF_CELL_MORPHOGENESIS	284	-0.253876	-1.31984	0.024975	0.13126	0.104295	5813	tags=24%, list=19%, signal=19%	PAK3/SLC26A5/EPHA4/MACF1/DVL2/FGD4/PLXNC1/TIAM1/DNM2/FYN/CDC42EP4/PLEKHO1/RIMS2/APOA1/FGR/OBSL1/MOV10/UNC13D/FGB/CCL2/RNF157/S100A10/CORO1C/PLXNA1/GBP1/BCL11A/ARAP1/PARP6/FGD3/CAMK2B/CPNE6/BCL9L/DLC1/PLXNA4/VEGFA/RHOBTB2/CAPRIN2/FBXO31/MIR21/TPM1/ZRANB1/SYT17/MSN/ITPKA/FGD5/PALM/MYO9A/ITGA7/FBLN1/LPAR1/DAPK3/PTN/RHOB/PDPN/RND3/EEF2K/ACTN4/FES/RND2/CDC42EP5/SEMA3E/DLG4/PLXNB1/FERMT2/OLFM4/LIMS2/FL…
GOBP_REGULATION_OF_VASCULATURE_DEVELOPMENT	GOBP_REGULATION_OF_VASCULATURE_DEVELOPMENT	304	-0.249083	-1.30361	0.024975	0.13126	0.104295	11180	tags=40%, list=36%, signal=26%	PRL/MIR29A/MIR210/ADAM12/MIR1908/SIRT6/ANGPTL3/MIR503/MIR27B/NPPB/MIR185/THBS1/ISM1/TNFSF12/TNMD/MIR125B1/MIR375/MIRLET7G/MIR126/PML/MIR30B/SPHK1/MIR30C1/MIR16-1/PPP1R16B/CCL24/ROCK2/MIR10A/MIR15A/CCL11/BMPER/RHOJ/SPRED1/MIR30E/COL4A3/MIR361/MIR138-1/RUNX1/MIR505/MIR1224/MAPK7/MIR939/MIR1-1/PTK2B/MIR487B/TMIGD2/CREB3L1/MIR20B/MIR125A/MIR24-1/PRKCB/PGF/TNFAIP3/SP100/PF4/MIR494/MIR1298/FGF18/MECP2/…
GOBP_CELL_DEATH_IN_RESPONSE_TO_OXIDATIVE_STRESS	GOBP_CELL_DEATH_IN_RESPONSE_TO_OXIDATIVE_STRESS	79	0.198966	1.41186	0.0249902	0.13126	0.104295	3488	tags=32%, list=11%, signal=28%	TXN/PPIA/LANCL1/NME5/GPR37/SIGMAR1/PDCD10/HTRA2/TRAP1/PARK7/UBQLN1/SOD1/PYCR1/MELK/CYP1B1/HIF1A/ARL6IP5/NONO/ZNF622/PAWR/SIRT1/PINK1/SFPQ/SLC1A1/P4HB
GOBP_ENDONUCLEOLYTIC_CLEAVAGE_INVOLVED_IN_RRNA_PROCESSING	GOBP_ENDONUCLEOLYTIC_CLEAVAGE_INVOLVED_IN_RRNA_PROCESSING	14	0.406046	1.70405	0.0250378	0.131399	0.104405	1694	tags=29%, list=5%, signal=27%	RPS21/RPP40/RRS1/RCL1
GOBP_EXOCRINE_SYSTEM_DEVELOPMENT	GOBP_EXOCRINE_SYSTEM_DEVELOPMENT	40	-0.382638	-1.53308	0.0250577	0.131399	0.104405	3634	tags=28%, list=12%, signal=24%	LAMA5/PLXNA1/SEMA3A/TGM2/EDAR/BMP7/SOX9/NTN4/FOXC1/TGFB3/TFCP2L1
GOBP_DOPAMINE_BIOSYNTHETIC_PROCESS	GOBP_DOPAMINE_BIOSYNTHETIC_PROCESS	11	0.461326	1.72026	0.0251319	0.13168	0.104629	1847	tags=36%, list=6%, signal=34%	DDC/GPR37/SNCA/PARK7
GOBP_REGULATION_OF_GENE_SILENCING	GOBP_REGULATION_OF_GENE_SILENCING	95	0.188102	1.41843	0.0252122	0.131993	0.104877	2918	tags=23%, list=9%, signal=21%	PPP3CA/MAP2K1/ZMPSTE24/NUP37/POLR2B/SEH1L/ASF1A/POLR2D/POLR2H/SEC13/BCDIN3D/POLR2F/NUP54/ATAD2/POLR2L/NUP205/NUP35/NUP62/POLR2I/NUP88/POLR2G/NUP153
GOBP_NEGATIVE_REGULATION_OF_STRIATED_MUSCLE_CELL_APOPTOTIC_PROCESS	GOBP_NEGATIVE_REGULATION_OF_STRIATED_MUSCLE_CELL_APOPTOTIC_PROCESS	27	-0.429728	-1.58003	0.0253337	0.132521	0.105297	2467	tags=26%, list=8%, signal=24%	PPP1R10/BAG3/MYOCD/MIR21/BMP7/CFLAR/HSPB6
GOBP_NEGATIVE_REGULATION_OF_DNA_DEPENDENT_DNA_REPLICATION	GOBP_NEGATIVE_REGULATION_OF_DNA_DEPENDENT_DNA_REPLICATION	16	0.378565	1.67566	0.0253874	0.132694	0.105434	11491	tags=94%, list=37%, signal=59%	GMNN/TIMELESS/TIPIN/ZNF830/DONSON/ATG7/LIG3/SMARCAL1/FBXO5/MSH3/BLM/CHEK2/BRCA2/SLFN11/ZRANB3
GOBP_NEGATIVE_REGULATION_OF_GLIAL_CELL_PROLIFERATION	GOBP_NEGATIVE_REGULATION_OF_GLIAL_CELL_PROLIFERATION	13	-0.531279	-1.59268	0.0255643	0.133509	0.106082	2228	tags=31%, list=7%, signal=29%	RNF10/PTN/NOTCH1/ASCL2
GOCC_CORTICAL_ACTIN_CYTOSKELETON	GOCC_CORTICAL_ACTIN_CYTOSKELETON	74	-0.334381	-1.48866	0.0256802	0.134006	0.106476	8090	tags=35%, list=26%, signal=26%	TRPV4/SPTBN5/SPTA1/LLGL2/MYADM/EPB41L2/PLEKHH2/PRKCB/LLGL1/FCHSD1/CDH2/KRT19/SPTBN2/SPTBN1/PJVK/SPTBN4/DLC1/DCDC2B/AKAP13/SPTAN1/CALD1/SHROOM1/RAPGEF3/CLDN5/CIB2/SHROOM4
GOCC_RECEPTOR_COMPLEX	GOCC_RECEPTOR_COMPLEX	395	-0.23786	-1.26625	0.025974	0.135428	0.107607	2751	tags=15%, list=9%, signal=14%	GRIN2A/P2RX6/RIPK1/GRIK5/AXL/HTR2A/ACVR1C/EPHA2/TNFRSF1A/ROR1/LRP1/LRP1B/RXRA/P2RX2/PLXNA4/IL18RAP/CAPRIN2/VIPR1/GRIA2/IKBKB/GFRA3/CD40/EPHB1/GPRC5B/GFRA2/RAMP2/PTH1R/IRS1/ITGA7/CHRNA5/GABBR1/LOXL4/IL4R/ITGA9/ITGB4/AHR/ITPR3/ITGA3/ITGA10/TRPC1/CSF2RA/TYRO3/DDR2/SYNJ2BP/SMAD3/NOTCH1/LIME1/GABRP/DLG4/PLXNB1/SHANK3/EPHB4/EMILIN1/CEACAM1/IL6/TF/TGFBR3/ROR2/ITGA5/ITGA8/EPHB6
GOBP_REGULATION_OF_HEART_CONTRACTION	GOBP_REGULATION_OF_HEART_CONTRACTION	233	-0.264876	-1.3512	0.026	0.135454	0.107627	7396	tags=30%, list=24%, signal=23%	MIR1-1/CACNA2D2/CACNG4/GJA5/MYL3/NPFF/EPAS1/GJD3/KCNIP2/MYH6/NPPC/NOS1/NOS1AP/DMD/DMPK/CTNNA3/ATP2A3/RYR3/MIR26A1/KCNJ12/ATP1A3/PLN/KCNE3/NPPA/KCNK6/FXYD1/EDN1/RGS4/TBX18/CALCA/TMEM65/KCNIP3/SEMA3A/SPTBN4/KCNH6/SLC4A3/RGS2/OXT/GNAO1/ATP1A2/SLC9A1/KCND1/SCN2B/EDN2/KCNA5/GJC1/NPR2/TPM1/CACNA1C/TBX2/ZC3H12A/RNF207/BIN1/EDN3/ITPR3/HBEGF/CAV1/TRPC1/STC1/FXYD6/ISL1/KCNK3/ATP2B4/HSPB7/CHGA/CACNA1H/POPDC…
GOBP_TISSUE_REMODELING	GOBP_TISSUE_REMODELING	167	-0.277234	-1.37726	0.0260782	0.135751	0.107863	6329	tags=27%, list=20%, signal=22%	AGER/LRP5/HAND2/ACVRL1/PPARGC1B/TNFAIP3/JAG1/LIF/CRB1/EFNA2/MIR214/SFRP1/SIGLEC15/MIR34A/HOXA3/HTR1B/NF1/FOXC2/CALCA/AXL/GPR55/EPHA2/TCIRG1/TGM2/MC4R/IGFBP5/RSPO3/CARTPT/PTH1R/PTN/CAV1/CD38/DDR2/FOXC1/CSPG4/IL18/TGFB3/CEACAM1/PRKCA/IL6/LRP5L/LEP/TF/PDK4/FLNA
GOMF_CHLORIDE_CHANNEL_INHIBITOR_ACTIVITY	GOMF_CHLORIDE_CHANNEL_INHIBITOR_ACTIVITY	10	-0.574468	-1.58287	0.0261389	0.135956	0.108026	1091	tags=60%, list=3%, signal=58%	WNK1/WNK3/STX1A/CFTR/WNK2/WNK4
GOBP_NEGATIVE_REGULATION_OF_RHO_PROTEIN_SIGNAL_TRANSDUCTION	GOBP_NEGATIVE_REGULATION_OF_RHO_PROTEIN_SIGNAL_TRANSDUCTION	17	-0.499629	-1.61962	0.0261701	0.136008	0.108067	2063	tags=35%, list=7%, signal=33%	DLC1/KCTD10/RASIP1/ITGA3/BCL6/CCDC125
GOBP_APOPTOTIC_PROCESS_INVOLVED_IN_DEVELOPMENT	GOBP_APOPTOTIC_PROCESS_INVOLVED_IN_DEVELOPMENT	33	-0.408388	-1.56583	0.026282	0.136479	0.108442	8019	tags=42%, list=26%, signal=32%	ROBO2/XKR5/LRP5/HAND2/TNFRSF1B/FOXC2/TNFRSF1A/SLIT3/BMP7/XKR4/SLIT2/NOTCH1/FOXC1/CRYAB
GOBP_RHO_PROTEIN_SIGNAL_TRANSDUCTION	GOBP_RHO_PROTEIN_SIGNAL_TRANSDUCTION	121	-0.291135	-1.39882	0.0263158	0.136544	0.108493	5982	tags=27%, list=19%, signal=22%	EPS8L2/ARRB1/GPR20/ARHGAP5/KCTD13/CDC42EP4/RASGRF1/APOA1/LIMK1/CELSR1/PLEKHG7/GPR55/DLC1/KCTD10/ARHGEF10/GPR35/KANK2/ARHGEF12/NGFR/ARHGAP4/AKAP13/STARD13/LPAR1/RASIP1/ITGA3/RHOB/ARHGEF2/PDPN/CDC42EP5/BCL6/MYO9B/CCDC125/STARD8
GOMF_STRUCTURAL_CONSTITUENT_OF_EYE_LENS	GOMF_STRUCTURAL_CONSTITUENT_OF_EYE_LENS	22	-0.45881	-1.6124	0.0265418	0.137605	0.109336	6615	tags=45%, list=21%, signal=36%	CRYBA2/CRYGC/CRYBG3/CRYBA1/CRYBB3/MIP/CRYGD/CRYGS/CRYAB/HSPB6
GOBP_SEGMENTATION	GOBP_SEGMENTATION	91	-0.31538	-1.45705	0.0265849	0.137717	0.109425	5373	tags=27%, list=17%, signal=23%	DVL2/TBX6/SFRP1/IRX3/EPB41L5/FOXC2/POFUT1/TBX18/SEMA3A/TBX3/MED12/HOXA2/TBX19/MTF2/DLL1/WNT3A/OSR1/SEMA3F/ALDH1A2/SMAD3/NOTCH1/FOXC1/XRCC2/FOXF1/ROR2
GOBP_ARTERY_DEVELOPMENT	GOBP_ARTERY_DEVELOPMENT	88	-0.317534	-1.45708	0.0266393	0.13774	0.109443	6008	tags=31%, list=19%, signal=25%	HAND2/ACVRL1/JAG1/SMAD6/MIR494/PRRX1/NF1/FOXC2/PDE2A/STRA6/MIR205/LRP1/VEGFA/MYOCD/LUZP1/NGFR/PRICKLE1/TBX2/SRF/GLI3/EFEMP2/NOTCH1/MYLK/FOXC1/FOXF1/ADAMTS9/LEP
GOMF_SEMAPHORIN_RECEPTOR_BINDING	GOMF_SEMAPHORIN_RECEPTOR_BINDING	23	-0.44908	-1.59174	0.0266415	0.13774	0.109443	7415	tags=48%, list=24%, signal=37%	SH3BP1/SEMA6D/SEMA7A/SEMA5B/SEMA3A/SEMA4C/SEMA6A/SEMA3F/SEMA3B/SEMA3E/PLXNB1
GOBP_NEGATIVE_REGULATION_OF_MUSCLE_CELL_APOPTOTIC_PROCESS	GOBP_NEGATIVE_REGULATION_OF_MUSCLE_CELL_APOPTOTIC_PROCESS	40	-0.38133	-1.52784	0.0266537	0.13774	0.109443	7881	tags=38%, list=25%, signal=28%	MIR30E/MIR138-1/ALOX12/PTK2B/HAND2/MIR24-1/EDN1/PPP1R10/BAG3/MYOCD/MIR21/BMP7/ZC3H12A/CFLAR/HSPB6
GOBP_BONE_REMODELING	GOBP_BONE_REMODELING	86	-0.318524	-1.45401	0.0267215	0.137963	0.109621	4802	tags=24%, list=15%, signal=21%	EFNA2/SFRP1/SIGLEC15/HTR1B/NF1/CALCA/GPR55/EPHA2/TCIRG1/MC4R/CARTPT/PTH1R/PTN/CD38/TGFB3/PRKCA/IL6/LRP5L/LEP/TF/PDK4
GOMF_ACTIVIN_BINDING	GOMF_ACTIVIN_BINDING	15	-0.500538	-1.56975	0.02674	0.137963	0.109621	449	tags=20%, list=1%, signal=20%	FSTL3/FST/TGFBR3
GOBP_REGULATION_OF_CHOLESTEROL_BIOSYNTHETIC_PROCESS	GOBP_REGULATION_OF_CHOLESTEROL_BIOSYNTHETIC_PROCESS	47	0.238839	1.41884	0.0269698	0.138941	0.110398	3908	tags=34%, list=12%, signal=30%	SQLE/RAN/APOE/FASN/TM7SF2/SOD1/KPNB1/SCD/PMVK/LPCAT3/ABCG1/ELOVL6/IDI1/GPAM/MVK/DHCR7
GOBP_EPITHELIAL_TUBE_MORPHOGENESIS	GOBP_EPITHELIAL_TUBE_MORPHOGENESIS	307	-0.248696	-1.30294	0.026973	0.138941	0.110398	3933	tags=20%, list=13%, signal=18%	SOX17/NOTO/RSPO2/SMO/LAMA5/WNT2B/CELSR1/FOXC2/EDN1/SPRY2/SIX2/PRKD2/CCDC40/TBX3/MED12/FGF2/NOTCH4/EPHA2/PTK7/DLC1/CEP290/VEGFA/NFATC4/LUZP1/PIK3CD/MIR21/DLG5/BMP7/SPRY1/BCL2/PRICKLE1/TBX2/PAK1/GATA3/SOX9/STARD13/VANGL2/SEMA4C/TNC/RNF207/SALL4/RASIP1/SRF/DLL1/GLI3/WNT3A/OSR1/RHOB/SLIT2/SMAD3/NOTCH1/EDNRA/NPHP3/SEMA3E/FOXF1/DCHS1/PKD1/WNK4/AHI1/HOXD11/LRP5L
GOBP_RESPONSE_TO_MECHANICAL_STIMULUS	GOBP_RESPONSE_TO_MECHANICAL_STIMULUS	192	-0.269124	-1.35079	0.0270541	0.139247	0.110641	5134	tags=23%, list=16%, signal=20%	HTT/PPL/FYN/PKDREJ/CDH2/NFKBIA/TRPA1/TMC1/STRC/NPPA/MEIS2/MPO/EDN1/ANKRD23/PJVK/LHFPL5/RETN/PDE2A/STRA6/ANKRD1/BTG2/HTR2A/JUND/BAG3/TNFRSF1A/ATP1A2/SLC9A1/IRF1/CNN2/KCNA5/CD40/CLCN6/TLR5/MAP3K14/SOX9/TNC/JUN/PTN/TNFSF14/FOSL1/SHANK3/ACTA1/PKD1/FOS/FOSB
GOBP_SEMI_LUNAR_VALVE_DEVELOPMENT	GOBP_SEMI_LUNAR_VALVE_DEVELOPMENT	41	-0.386323	-1.55731	0.0272343	0.140049	0.111278	5523	tags=37%, list=18%, signal=30%	JAG1/SMAD6/TNFRSF1B/NPPA/SNAI2/STRA6/ELN/GATA5/TNFRSF1A/SLIT3/GATA3/SOX9/SLIT2/NOTCH1/EMILIN1
GOBP_GLOMERULUS_DEVELOPMENT	GOBP_GLOMERULUS_DEVELOPMENT	62	-0.342976	-1.48699	0.0272537	0.140049	0.111278	4552	tags=26%, list=15%, signal=22%	COL4A4/IL6R/PLCE1/FOXC2/SULF2/BMP7/BCL2/ANGPT1/OSR1/ADIPOQ/NOTCH1/EGR1/FOXC1/CFLAR/LAMB2/PROM1
GOBP_NEGATIVE_REGULATION_OF_MYOBLAST_DIFFERENTIATION	GOBP_NEGATIVE_REGULATION_OF_MYOBLAST_DIFFERENTIATION	23	-0.447607	-1.58652	0.0273202	0.140279	0.111461	5379	tags=57%, list=17%, signal=47%	SRA1/ID3/ANKRD2/CMTM5/DDIT3/PPARD/TBX3/EID2B/PRICKLE1/SOX9/DLL1/NOTCH1/IL18
GOBP_GENITALIA_DEVELOPMENT	GOBP_GENITALIA_DEVELOPMENT	41	-0.386204	-1.55682	0.0275528	0.14136	0.11232	2857	tags=27%, list=9%, signal=24%	STRA6/TBX3/AXL/HOXD13/RBP4/SRD5A2/TYRO3/FOXF2/PKD1/TP63/ROR2
GOBP_MACROPHAGE_CYTOKINE_PRODUCTION	GOBP_MACROPHAGE_CYTOKINE_PRODUCTION	15	-0.499514	-1.56654	0.0278025	0.142527	0.113247	1599	tags=33%, list=5%, signal=32%	SEMA7A/GPRC5B/LILRB1/IRAK3/TGFB3
GOBP_NEGATIVE_REGULATION_OF_MYELOID_CELL_DIFFERENTIATION	GOBP_NEGATIVE_REGULATION_OF_MYELOID_CELL_DIFFERENTIATION	77	-0.324761	-1.45879	0.0278638	0.142727	0.113406	6526	tags=31%, list=21%, signal=25%	INHA/GPR171/LTF/FBXW7/PF4/SFRP1/NFKBIA/MEIS2/ITPKB/LRRC17/GPR55/ZBTB46/TOB2/LILRB3/RARA/LILRB1/CARTPT/MEIS1/ZBTB16/DLL1/ADIPOQ/FSTL3/ZFP36/CEACAM1
GOCC_METHYLTRANSFERASE_COMPLEX	GOCC_METHYLTRANSFERASE_COMPLEX	84	0.182461	1.31599	0.0279281	0.142942	0.113577	2928	tags=23%, list=9%, signal=21%	RBBP5/TAF7/SNRPF/CLNS1A/RUVBL1/WDR5B/SNRPB/DPY30/ERH/PRMT5/RUVBL2/SNRPG/PRMT1/TAF9/RBBP7/PAXIP1/RBM15B/METTL3/METTL14
GOBP_MYELOID_LEUKOCYTE_CYTOKINE_PRODUCTION	GOBP_MYELOID_LEUKOCYTE_CYTOKINE_PRODUCTION	25	-0.436335	-1.56834	0.0279642	0.143012	0.113633	1599	tags=32%, list=5%, signal=30%	SEMA7A/NR4A3/GPRC5B/LILRB1/IRAK3/BCL6/CHGA/TGFB3
GOBP_RESPONSE_TO_REACTIVE_OXYGEN_SPECIES	GOBP_RESPONSE_TO_REACTIVE_OXYGEN_SPECIES	206	-0.265993	-1.3452	0.028028	0.143225	0.113801	5820	tags=25%, list=19%, signal=21%	ANKZF1/PPARGC1B/MYB/TNFAIP3/CCR7/DNM2/FYN/FER/NR4A3/TRPA1/ZNF580/UCP1/MIR34A/MPO/PCGF2/EDN1/HDAC6/CRYGD/CCL19/HBA1/PJVK/RIPK1/AXL/MMP3/GNAO1/IL18RAP/KCNA5/SESN2/MIR21/TPM1/BMP7/FBLN5/BCL2/H19/KDM6B/RNF112/SOD3/JUN/DUSP1/RHOB/FOXO1/FOSL1/KLF2/HBA2/GSTP1/PPARGC1A/IL10/CFLAR/CRYAB/FOS/IL6/SCGB1A1
GOBP_REGENERATION	GOBP_REGENERATION	179	-0.271702	-1.356	0.0280561	0.143254	0.113825	3013	tags=17%, list=10%, signal=16%	GAP43/PPARD/AXL/CEBPB/SULF2/LPIN1/LRP1/EYS/KLF5/UPF2/RGMA/BCL2/TNC/SGCA/GLI3/PTN/FZD9/ISL1/NOTCH1/JAM3/SOX15/GSTP1/BIN3/IL10/PNPT1/CFLAR/MAPK8IP3/IL6/TGFBR3/LAMB2/FLNA
GOBP_RNA_INTERFERENCE	GOBP_RNA_INTERFERENCE	12	0.42329	1.6418	0.0281159	0.143331	0.113886	10853	tags=92%, list=35%, signal=60%	TSNAX/PRKRA/CLP1/MRPL44/TARBP2/DHX9/ADAR/XPO5/TSN/TERT/DICER1
GOCC_ZYMOGEN_GRANULE	GOCC_ZYMOGEN_GRANULE	12	0.422636	1.63926	0.0281159	0.143331	0.113886	292	tags=17%, list=1%, signal=17%	TMED10/TMED2
GOBP_PROTEIN_REFOLDING	GOBP_PROTEIN_REFOLDING	23	0.310788	1.57648	0.0282553	0.143927	0.114359	3320	tags=35%, list=11%, signal=31%	HSPA8/FKBP1A/B2M/HSPA14/HSPA9/DNAJA4/HSPD1/HSP90AA1
GOMF_TRANSFERASE_ACTIVITY_TRANSFERRING_ALKYL_OR_ARYL_OTHER_THAN_METHYL_GROUPS	GOMF_TRANSFERASE_ACTIVITY_TRANSFERRING_ALKYL_OR_ARYL_OTHER_THAN_METHYL_GROUPS	56	-0.351357	-1.50029	0.0283912	0.144504	0.114818	3587	tags=20%, list=11%, signal=17%	PTGES/GSTA1/GSTM1/GSTT2/MMAB/MAT2A/DTWD2/GSTP1/GSTM5/GSTM3/GSTM2
GOBP_SALIVARY_GLAND_DEVELOPMENT	GOBP_SALIVARY_GLAND_DEVELOPMENT	31	-0.406883	-1.54447	0.0284775	0.144829	0.115076	3634	tags=29%, list=12%, signal=26%	LAMA5/PLXNA1/SEMA3A/TGM2/EDAR/BMP7/NTN4/TGFB3/TFCP2L1
GOBP_CELLULAR_RESPONSE_TO_KETONE	GOBP_CELLULAR_RESPONSE_TO_KETONE	91	-0.311658	-1.43986	0.0286299	0.145488	0.1156	1554	tags=15%, list=5%, signal=15%	MSN/DDIT4/NPAS4/TNC/CFTR/ADCY3/AHR/FOXO1/ERRFI1/KLF2/SERPINF1/SGK1/SCNN1G/CFLAR
GOMF_MAP_KINASE_PHOSPHATASE_ACTIVITY	GOMF_MAP_KINASE_PHOSPHATASE_ACTIVITY	14	-0.510408	-1.5561	0.0289196	0.146844	0.116677	5595	tags=50%, list=18%, signal=41%	DUSP7/DUSP9/DUSP3/DUSP18/DUSP1/DUSP8/DUSP5
GOBP_NEGATIVE_REGULATION_OF_SUPRAMOLECULAR_FIBER_ORGANIZATION	GOBP_NEGATIVE_REGULATION_OF_SUPRAMOLECULAR_FIBER_ORGANIZATION	144	-0.280411	-1.37405	0.0292044	0.148173	0.117733	3240	tags=18%, list=10%, signal=16%	SPTBN2/HDAC6/SPTBN1/TAOK1/SPTBN4/ARAP1/CORO2B/PFN4/PICK1/DLC1/CGNL1/MIR21/SPTAN1/SVIL/CLASP1/ARHGEF2/VILL/SLIT2/FHOD3/KANK4/SHANK3/EMILIN1/CRYAB/LMOD1/LMOD3/CLIP3
GOBP_PEPTIDE_CROSS_LINKING	GOBP_PEPTIDE_CROSS_LINKING	33	-0.395979	-1.51825	0.029316	0.148398	0.117912	2647	tags=21%, list=8%, signal=19%	ABCA7/EGFLAM/SPOCK3/TGM2/EVPL/TGM1/TGM4
GOBP_DETOXIFICATION	GOBP_DETOXIFICATION	124	-0.288241	-1.39141	0.0293225	0.148398	0.117912	3819	tags=20%, list=12%, signal=18%	MPO/TXNDC2/PTGES/GSTA1/HBA1/NXN/GSTM1/PTGS1/HBD/SESN2/MIR21/BMP7/PIM1/CYGB/FBLN5/H19/DUOX1/SOD3/GPX8/HBA2/GSTP1/GPX2/GPX3/GSTM3/GSTM2
GOMF_PROTEIN_TAG	GOMF_PROTEIN_TAG	13	0.418993	1.65892	0.0293585	0.148398	0.117912	3051	tags=46%, list=10%, signal=42%	SUMO2/UBB/UBL5/SUMO3/RPS27A/NEDD8
GOBP_REGULATION_OF_EXECUTION_PHASE_OF_APOPTOSIS	GOBP_REGULATION_OF_EXECUTION_PHASE_OF_APOPTOSIS	16	-0.485517	-1.54325	0.0293772	0.148398	0.117912	2063	tags=31%, list=7%, signal=29%	GCG/DLC1/DFFA/ZC3H12A/PTGIS
GOBP_NEGATIVE_REGULATION_OF_FAT_CELL_DIFFERENTIATION	GOBP_NEGATIVE_REGULATION_OF_FAT_CELL_DIFFERENTIATION	48	-0.363556	-1.50984	0.0293809	0.148398	0.117912	5523	tags=29%, list=18%, signal=24%	JAG1/ANKRD26/RUNX1T1/DDIT3/ZFPM2/JDP2/GATA3/WNT3A/ADIPOQ/FOXO1/SMAD3/FERMT2/TGFB1I1/IL6
GOBP_ENDOTHELIAL_CELL_DEVELOPMENT	GOBP_ENDOTHELIAL_CELL_DEVELOPMENT	63	-0.338006	-1.4665	0.0294118	0.148398	0.117912	3535	tags=22%, list=11%, signal=20%	S1PR3/PDE2A/NOTCH4/TNFRSF1A/VEGFA/IKBKB/MSN/VCL/COL18A1/STC1/COL22A1/RAPGEF3/CLDN5/GSTM3
GOBP_REGULATION_OF_WNT_SIGNALING_PATHWAY_PLANAR_CELL_POLARITY_PATHWAY	GOBP_REGULATION_OF_WNT_SIGNALING_PATHWAY_PLANAR_CELL_POLARITY_PATHWAY	15	-0.490432	-1.53806	0.0294464	0.148398	0.117912	4623	tags=40%, list=15%, signal=34%	SFRP1/ANKRD6/DKK1/RSPO3/PLEKHA4/NPHP3
GOMF_PROTEIN_DEMETHYLASE_ACTIVITY	GOMF_PROTEIN_DEMETHYLASE_ACTIVITY	15	-0.491051	-1.54	0.0294464	0.148398	0.117912	11089	tags=67%, list=35%, signal=43%	KDM2B/HR/FBXL19/PHF8/JMJD6/KDM1B/PHF2/UTY/KDM5A/KDM6B
GOCC_ENDORIBONUCLEASE_COMPLEX	GOCC_ENDORIBONUCLEASE_COMPLEX	24	0.308478	1.58841	0.0294671	0.148398	0.117912	3146	tags=33%, list=10%, signal=30%	POP7/RPP40/HSD17B10/POP4/PRKRA/CLP1/RPP21/TSEN34
GOMF_SOLUTE_PROTON_SYMPORTER_ACTIVITY	GOMF_SOLUTE_PROTON_SYMPORTER_ACTIVITY	20	0.322032	1.53909	0.0294884	0.148398	0.117912	1285	tags=20%, list=4%, signal=19%	SLC33A1/SLC39A8/MFSD3/SLC2A10
GOBP_FILOPODIUM_ASSEMBLY	GOBP_FILOPODIUM_ASSEMBLY	52	-0.354823	-1.49513	0.0295359	0.148398	0.117912	7415	tags=38%, list=24%, signal=29%	SH3BP1/FGD1/NLGN1/CCR7/FGD4/SPATA13/DNM3/FXR2/GAP43/ARAP1/FGD3/AGRN/FGD5/PALM/ARHGEF4/SRF/ITGB4/DPYSL3/CCL21/TGFB3
GOBP_RESPONSE_TO_FOOD	GOBP_RESPONSE_TO_FOOD	33	-0.403876	-1.54852	0.0295468	0.148398	0.117912	2216	tags=21%, list=7%, signal=20%	OXT/CLPS/HSD11B2/CARTPT/NPY/LEP/CCK
GOBP_PROSTANOID_METABOLIC_PROCESS	GOBP_PROSTANOID_METABOLIC_PROCESS	47	-0.363076	-1.49748	0.0295671	0.148398	0.117912	3587	tags=28%, list=11%, signal=25%	PTGES/EDN1/GSTA1/GSTM1/TNFRSF1A/PTGS1/EDN2/CYP4F8/PTGR2/GSTP1/ATP6V1B1/PTGDS/PTGIS
GOBP_REGULATION_OF_TRANSCRIPTION_INITIATION_FROM_RNA_POLYMERASE_II_PROMOTER	GOBP_REGULATION_OF_TRANSCRIPTION_INITIATION_FROM_RNA_POLYMERASE_II_PROMOTER	35	0.260437	1.44548	0.0295731	0.148398	0.117912	2646	tags=26%, list=8%, signal=24%	PSMC4/HEY2/SUB1/CAND1/DHX36/PSMC2/PSMC6/MED30/PAXIP1
GOBP_EOSINOPHIL_MIGRATION	GOBP_EOSINOPHIL_MIGRATION	22	-0.441876	-1.55288	0.0296128	0.148447	0.117951	10109	tags=55%, list=32%, signal=37%	ADAM8/DAPK2/HRH1/CCL24/CCL11/CCL1/SCG2/CCL2/CCL26/CCL5/CCL21/CX3CL1
GOCC_TRANSCRIPTION_ELONGATION_FACTOR_COMPLEX	GOCC_TRANSCRIPTION_ELONGATION_FACTOR_COMPLEX	36	0.260354	1.44764	0.0296361	0.148447	0.117951	13328	tags=83%, list=42%, signal=48%	WDR61/TTF2/ELL2/LEO1/SUPT4H1/RB1/EAF1/AFF4/ELP4/ELL3/SNW1/ELOF1/ELP2/CTR9/ZC3H8/CDC73/SUPT16H/AFF3/NUFIP1/RTF1/EAF2/SETD5/TCEA2/AFF1/CCNT2/MLLT3/CDK9/SSRP1/CCNK/ELL
GOBP_POSITIVE_REGULATION_OF_CELL_JUNCTION_ASSEMBLY	GOBP_POSITIVE_REGULATION_OF_CELL_JUNCTION_ASSEMBLY	89	-0.312142	-1.43515	0.0296524	0.148447	0.117951	3082	tags=22%, list=10%, signal=20%	S100A10/FLRT2/EPHA2/LRRN3/OXT/VEGFA/SLITRK3/AGRN/PPM1F/DLG5/EPHB1/NLGN3/CAV1/EEF2K/SMAD3/NLGN2/FLRT3/FERMT2/CLDN5/COL16A1
GOBP_REGULATION_OF_COLLAGEN_METABOLIC_PROCESS	GOBP_REGULATION_OF_COLLAGEN_METABOLIC_PROCESS	40	-0.380163	-1.52316	0.029724	0.14847	0.11797	773	tags=20%, list=2%, signal=20%	AMELX/PPARD/MFAP4/ERRFI1/EMILIN1/TGFB3/SERPINF2/IL6
GOMF_VITAMIN_B6_BINDING	GOMF_VITAMIN_B6_BINDING	46	0.240782	1.40517	0.0297259	0.14847	0.11797	2799	tags=22%, list=9%, signal=20%	DDC/GLDC/SGPL1/PNPO/PDXDC1/SHMT2/PSAT1/ALB/SPTLC2/MOCOS
GOBP_NEPHRIC_DUCT_DEVELOPMENT	GOBP_NEPHRIC_DUCT_DEVELOPMENT	13	-0.527877	-1.58248	0.0297265	0.14847	0.11797	1317	tags=31%, list=4%, signal=29%	GATA3/OSR1/PKD1/AHI1
GOBP_REGULATION_OF_RESPONSE_TO_REACTIVE_OXYGEN_SPECIES	GOBP_REGULATION_OF_RESPONSE_TO_REACTIVE_OXYGEN_SPECIES	29	-0.419273	-1.56975	0.0297731	0.148587	0.118062	4693	tags=34%, list=15%, signal=29%	NR4A3/MIR34A/HDAC6/RIPK1/SESN2/MIR21/BMP7/FBLN5/H19/IL10
GOCC_U5_SNRNP	GOCC_U5_SNRNP	16	0.37223	1.64762	0.0298239	0.148725	0.118172	4244	tags=62%, list=14%, signal=54%	SNRPN/SNRPB/SNRPG/PRPF6/PRPF18/SNRNP40/SNRPD2/SNRPD1/PRPF8/CD2BP2
GOBP_CGMP_METABOLIC_PROCESS	GOBP_CGMP_METABOLIC_PROCESS	15	-0.497023	-1.55873	0.0299276	0.149126	0.11849	7221	tags=60%, list=23%, signal=46%	GUCY2D/NPPC/NPPA/GUCY1A2/PDE5A/PDE2A/PDE9A/GUCY2F/NPR2
GOBP_POSITIVE_REGULATION_OF_CELL_DEVELOPMENT	GOBP_POSITIVE_REGULATION_OF_CELL_DEVELOPMENT	276	-0.250969	-1.3026	0.02997	0.149126	0.118491	8065	tags=30%, list=26%, signal=23%	MYF6/ASCL1/ROBO2/NTN1/STK11/MAP6/PTPRD/MYF5/OTP/PLXNB2/DISC1/RET/CUX2/MYADM/ZNF365/BNC1/ANAPC2/SERPINE2/PAK3/MYB/IL34/EPHA4/DMRTA2/MACF1/LIF/MYOD1/PLXNC1/TIAM1/DNM2/MIR221/SEMA7A/TNFRSF1B/NEFL/APOA1/OBSL1/SMO/UNC13D/LIMK1/FGB/S100A10/CRABP2/SMARCD3/PLXNA1/CLCF1/ZNF335/PARP6/RASSF10/CAMK2B/LRP1/PLXNA4/VEGFA/CAPRIN2/FBXO31/RUFY3/NUMBL/ETV5/NGFR/ITPKA/BCL2/PAK1/BIN1/RNF112/SPEN/SRF/GLI3/WNT3A/PTN/AD…
GOBP_RESPONSE_TO_ALCOHOL	GOBP_RESPONSE_TO_ALCOHOL	229	-0.263892	-1.34486	0.03	0.149126	0.118491	5404	tags=21%, list=17%, signal=18%	CCR7/H6PD/RAD51/FYN/SCNN1B/SLC2A4/SFRP1/AKAP8/NEFL/ADH7/HSD3B1/HTR1B/SMO/HMGCS1/RGS4/CCL19/GRIN2A/ADCY5/RGS2/OXT/SLIT3/RBP4/GNRH1/GATA3/NPAS4/MAOB/TNC/S100A8/OSBPL7/CFTR/ADCY3/AHR/ADIPOQ/CES1/SLIT2/FOSL1/DRD4/KLF2/ACTC1/SGK1/GSTP1/SCNN1G/CCL21/KCNMB1/FOS/LEP/PENK/TGFBR3/FOSB
GOBP_CELLULAR_MONOVALENT_INORGANIC_CATION_HOMEOSTASIS	GOBP_CELLULAR_MONOVALENT_INORGANIC_CATION_HOMEOSTASIS	107	0.173251	1.42029	0.0300005	0.149126	0.118491	3694	tags=27%, list=12%, signal=24%	AQP11/ATP6V1A/CA2/SLC4A4/ATP6V0B/SNAPIN/ATP6V1G1/RAB20/GPR89A/ATP6V0E2/GRN/ATP6V0E1/ATP6AP2/SLC9A2/TMEM9/SLC9A9/TMEM165/ATP6V0D1/SLC12A2/ATP6V1E2/CLCN3/ATP6V1D/DMXL1/CCDC115/PPT1/ATP6V1F/ATP1B1/ATP6V1B2/TMEM199
GOBP_NEPHRON_MORPHOGENESIS	GOBP_NEPHRON_MORPHOGENESIS	71	-0.329704	-1.45922	0.0300207	0.149126	0.118491	4740	tags=27%, list=15%, signal=23%	KLHL3/IRX3/SMO/LAMA5/WNT2B/SIX2/FGF2/VEGFA/BMP7/BCL2/GATA3/SOX9/GLI3/OSR1/DCHS1/PKD1/WNK4/AHI1/HOXD11
GOBP_CELL_CELL_JUNCTION_ORGANIZATION	GOBP_CELL_CELL_JUNCTION_ORGANIZATION	194	-0.267636	-1.344	0.0300601	0.149136	0.118498	2468	tags=15%, list=8%, signal=14%	CDH10/EPHA2/GJB6/VEGFA/IKBKB/GJC1/PKP1/NUMBL/DLG5/RAMP2/CDH3/CTNND1/VCL/SRF/CAV1/SDK2/SMAD3/NLGN2/CNTNAP1/JAM3/TLN1/FERMT2/DCHS1/CLDN5/TGFB3/PIP5K1C/PRKCA/LIMS2/CD177/FLNA
GOBP_REGULATION_OF_SUPEROXIDE_METABOLIC_PROCESS	GOBP_REGULATION_OF_SUPEROXIDE_METABOLIC_PROCESS	30	-0.41221	-1.55722	0.0300692	0.149136	0.118498	1699	tags=23%, list=5%, signal=22%	MIR21/BMP7/FBLN5/H19/PON3/GSTP1/CD177
GOMF_TRANSFERASE_ACTIVITY_TRANSFERRING_AMINO_ACYL_GROUPS	GOMF_TRANSFERASE_ACTIVITY_TRANSFERRING_AMINO_ACYL_GROUPS	18	-0.468434	-1.53868	0.0301624	0.149482	0.118774	1926	tags=22%, list=6%, signal=21%	TGM2/TGM1/GGT6/TGM4
GOMF_ATPASE_COUPLED_ION_TRANSMEMBRANE_TRANSPORTER_ACTIVITY	GOMF_ATPASE_COUPLED_ION_TRANSMEMBRANE_TRANSPORTER_ACTIVITY	45	0.234944	1.38988	0.030226	0.149682	0.118932	1425	tags=16%, list=5%, signal=15%	ABCC4/ATP6V1A/ATP2C1/ATP6V0B/ATP6V1G1/ATP6V0E2/ATP6V0E1
GOMF_1_PHOSPHATIDYLINOSITOL_BINDING	GOMF_1_PHOSPHATIDYLINOSITOL_BINDING	14	0.399605	1.67702	0.0304512	0.150681	0.119726	18852	tags=100%, list=60%, signal=40%	PICALM/SCARB1/SCIN/SNX10/WDFY1/EEA1/EPB41/ZFYVE16/SNX9/WDFY3/ZFYVE1/ZFYVE9/FRMPD2/SNAP91
GOMF_NEUROPEPTIDE_HORMONE_ACTIVITY	GOMF_NEUROPEPTIDE_HORMONE_ACTIVITY	28	-0.416421	-1.54687	0.0305677	0.15114	0.120091	10894	tags=57%, list=35%, signal=37%	UCN/PPY/HCRT/AVP/NPFF/ASIP/PNOC/NPPA/PYY/PRLH/OXT/GRP/CARTPT/NPY/PENK/CCK
GOBP_MYOTUBE_DIFFERENTIATION	GOBP_MYOTUBE_DIFFERENTIATION	93	-0.306528	-1.41971	0.0307062	0.151526	0.120398	2034	tags=17%, list=6%, signal=16%	P2RX2/MYOCD/KLF5/RBM38/BCL2/IL4R/MYOF/NOTCH1/BIN3/CFLAR/SIK1/ACTA1/CACNA1H/EHD2/LMOD3/SCGB3A1
GOCC_A_BAND	GOCC_A_BAND	35	-0.393122	-1.53583	0.0307124	0.151526	0.120398	4510	tags=31%, list=14%, signal=27%	SMTNL2/DST/OBSL1/MYBPC3/SPTBN1/CMYA5/FHL2/OBSCN/MYOM1/CRYAB/LMOD3
GOBP_DETECTION_OF_LIGHT_STIMULUS_INVOLVED_IN_SENSORY_PERCEPTION	GOBP_DETECTION_OF_LIGHT_STIMULUS_INVOLVED_IN_SENSORY_PERCEPTION	21	-0.443757	-1.53479	0.0307167	0.151526	0.120398	9779	tags=62%, list=31%, signal=43%	CNGB1/CACNA2D4/GJA10/GNAT1/CEP250/CRB1/SEMA5B/CCDC66/RPE65/GUCY2F/PRPH2/BEST1/EYS
GOBP_DNA_DEMETHYLATION	GOBP_DNA_DEMETHYLATION	27	-0.4253	-1.56375	0.030837	0.151769	0.120591	6568	tags=37%, list=21%, signal=29%	TET3/TDG/APOBEC3A/AICDA/APOBEC3D/TOX/TET1/APOBEC3F/GATA3/APOBEC3C
GOBP_EMBRYONIC_HINDLIMB_MORPHOGENESIS	GOBP_EMBRYONIC_HINDLIMB_MORPHOGENESIS	27	-0.424886	-1.56223	0.030837	0.151769	0.120591	4141	tags=30%, list=13%, signal=26%	ALX4/RSPO2/PITX1/TBX3/ZBTB16/OSR1/NOTCH1/TP63
GOMF_ALPHA_ACTININ_BINDING	GOMF_ALPHA_ACTININ_BINDING	27	-0.424103	-1.55935	0.030837	0.151769	0.120591	2701	tags=33%, list=9%, signal=30%	LRRC10/PDLIM7/PDLIM4/ADORA2A/KCNA5/RARA/CACNA1C/PALLD/SYNPO2
GOCC_NUCLEAR_EXOSOME_RNASE_COMPLEX	GOCC_NUCLEAR_EXOSOME_RNASE_COMPLEX	15	0.388802	1.64662	0.0308935	0.151929	0.120718	2273	tags=27%, list=7%, signal=25%	EXOSC5/EXOSC4/EXOSC3/EXOSC9
GOBP_ODONTOGENESIS_OF_DENTIN_CONTAINING_TOOTH	GOBP_ODONTOGENESIS_OF_DENTIN_CONTAINING_TOOTH	82	-0.317307	-1.44123	0.0309278	0.151929	0.120718	4714	tags=26%, list=15%, signal=22%	ENAM/FAM20A/RSPO2/SMO/LAMA5/AMELX/HTRA1/GNAO1/TCIRG1/EDAR/LRP4/BMP7/NGFR/ANKRD11/TNC/GLI3/FOXO1/FOXC1/FST/SERPINE1/TP63
GOBP_POSTSYNAPTIC_MEMBRANE_ASSEMBLY	GOBP_POSTSYNAPTIC_MEMBRANE_ASSEMBLY	11	-0.552651	-1.56201	0.0309406	0.151929	0.120718	6181	tags=64%, list=20%, signal=51%	NLGN1/NRXN2/CDH2/LRP4/NLGN3/CEL/NLGN2
GOBP_NEGATIVE_REGULATION_OF_GROWTH	GOBP_NEGATIVE_REGULATION_OF_GROWTH	235	-0.259457	-1.32543	0.031	0.152104	0.120857	2865	tags=16%, list=9%, signal=14%	PPARD/BCL11A/SEMA3A/TRIM46/RAI1/RGS2/DCBLD2/CAPRIN2/SLIT3/SESN2/IGFBP5/RBP4/BCL2/ARHGAP4/PAK1/MEIS1/DCUN1D3/SEMA4C/SEMA6A/WNT3A/TSPYL2/SEMA3F/SEMA3B/SLIT2/SMAD3/DACT3/FHL1/NOTCH1/BST2/SEMA3E/BCL6/PNPT1/WFDC1/CRYAB/PI16/MEG3/SCGB3A1
GOCC_INTERMEDIATE_FILAMENT_CYTOSKELETON	GOCC_INTERMEDIATE_FILAMENT_CYTOSKELETON	220	-0.263179	-1.33618	0.031031	0.15214	0.120885	7788	tags=30%, list=25%, signal=23%	KRTAP15-1/DISC1/KRT79/KRTAP6-1/KRT76/KRTAP20-1/KRTAP4-11/KRTAP4-2/KRTAP9-8/KRTAP4-4/KRTAP1-5/KRTAP13-3/KRTAP4-1/INA/KRTAP7-1/KRTAP19-1/MACF1/KRTAP10-1/KRTAP5-10/KRT85/UPP2/KRT4/PPL/KRTAP9-4/NARF/KRTAP2-1/KRTAP6-3/KRT12/DST/KRTAP10-3/KRT6A/NEFL/KRTAP19-6/KRTAP3-2/KRTAP5-11/KRT19/KRT27/KRTAP10-12/KRT78/KRTAP12-2/KRTAP21-2/KRTAP11-1/IFFO2/KRTAP4-12/KRT23/ADCY5/PNN/ADORA2A/PKP1/KRT16/EVPL/IFFO1/LMNA/…
GOMF_ACYLGLYCEROL_O_ACYLTRANSFERASE_ACTIVITY	GOMF_ACYLGLYCEROL_O_ACYLTRANSFERASE_ACTIVITY	23	0.303863	1.54135	0.0311286	0.152502	0.121173	714	tags=17%, list=2%, signal=17%	CRLS1/LCLAT1/AGPAT5/ABHD5
GOBP_STEROID_HORMONE_SECRETION	GOBP_STEROID_HORMONE_SECRETION	20	0.318141	1.5205	0.0312062	0.152648	0.121289	1196	tags=25%, list=4%, signal=24%	BMP6/AGTR1/NKX3-1/FZD4/GAL
GOCC_U2_SNRNP	GOCC_U2_SNRNP	20	0.318707	1.5232	0.0312062	0.152648	0.121289	3957	tags=45%, list=13%, signal=39%	SNRPN/SNRPB2/SNRPB/SNRPG/SF3B5/SNRPA1/SF3B1/SNRPD2/SNRPD1
GOBP_POSITIVE_REGULATION_OF_PROTEIN_DEACETYLATION	GOBP_POSITIVE_REGULATION_OF_PROTEIN_DEACETYLATION	22	-0.449855	-1.58093	0.0313363	0.153148	0.121686	4347	tags=27%, list=14%, signal=24%	AKAP8/PRKD2/VEGFA/JDP2/AKAP8L/BCL6
GOBP_RESPONSE_TO_ESTRADIOL	GOBP_RESPONSE_TO_ESTRADIOL	121	-0.287507	-1.38139	0.0313765	0.153148	0.121686	2216	tags=15%, list=7%, signal=14%	OXT/NCOR2/BMP7/RAMP2/DUSP1/PTN/CD38/ALDH1A2/GSTP1/PPARGC1A/IL10/WFDC1/CFLAR/CRYAB/LEP/PENK/MBD4/SSTR2
GOBP_REGULATION_OF_EXOSOMAL_SECRETION	GOBP_REGULATION_OF_EXOSOMAL_SECRETION	15	0.388386	1.64486	0.0313801	0.153148	0.121686	2722	tags=33%, list=9%, signal=30%	SDCBP/TSG101/VPS4B/STAM/CHMP2A
GOBP_NEGATIVE_REGULATION_OF_TRANSMEMBRANE_RECEPTOR_PROTEIN_SERINE_THREONINE_KINASE_SIGNALING_PATHWAY	GOBP_NEGATIVE_REGULATION_OF_TRANSMEMBRANE_RECEPTOR_PROTEIN_SERINE_THREONINE_KINASE_SIGNALING_PATHWAY	125	-0.291862	-1.41135	0.0314389	0.153319	0.121822	3279	tags=20%, list=10%, signal=18%	SPRY2/IGSF1/RASL11B/HTRA1/BCL9L/DKK1/ADAMTSL2/ADAM17/SPRY1/WFIKKN1/CAV1/FBN2/HIPK2/NBL1/IL17RD/SPINT3/SMAD3/NOTCH1/FSTL3/FST/EMILIN1/TGFB1I1/TGFB3/TGFBR3/RBPMS2
GOBP_EMBRYONIC_DIGIT_MORPHOGENESIS	GOBP_EMBRYONIC_DIGIT_MORPHOGENESIS	46	-0.362	-1.48997	0.0316122	0.153925	0.122304	6179	tags=33%, list=20%, signal=26%	LRP5/HAND2/CREBBP/ALX4/INTU/TBX3/FREM2/HOXD13/LRP4/TBX2/ZBTB16/GLI3/OSR1/NOTCH1/ROR2
GOBP_RESPONSE_TO_RETINOIC_ACID	GOBP_RESPONSE_TO_RETINOIC_ACID	98	-0.300395	-1.40289	0.0316327	0.153925	0.122304	2219	tags=18%, list=7%, signal=17%	HOXA2/OXT/PTK7/RXRA/RORB/RARA/CREB1/RBP4/SOX9/WNT5B/TNC/WNT3A/DUSP1/OSR1/CD38/ALDH1A2/SERPINF1/LEP
GOMF_PHOSPHATIDYLINOSITOL_3_4_BISPHOSPHATE_BINDING	GOMF_PHOSPHATIDYLINOSITOL_3_4_BISPHOSPHATE_BINDING	28	-0.413274	-1.53518	0.0316594	0.153925	0.122304	1243	tags=21%, list=4%, signal=21%	OBSCN/PHLDA3/ARAP3/PLEKHA4/DAPP1/SH3PXD2A
GOMF_RECEPTOR_INHIBITOR_ACTIVITY	GOMF_RECEPTOR_INHIBITOR_ACTIVITY	28	-0.413734	-1.53689	0.0316594	0.153925	0.122304	7395	tags=43%, list=24%, signal=33%	DKK2/LY6E/IL18BP/DKK3/ADH7/IGSF1/DKK1/CCL5/WFIKKN1/SPINT3/FST/LY6G6D
GOBP_LONG_TERM_MEMORY	GOBP_LONG_TERM_MEMORY	31	-0.402339	-1.52722	0.0317634	0.154314	0.122613	6339	tags=42%, list=20%, signal=33%	KAT2A/ARC/LRRN4/MECP2/SLC2A4/RASGRF1/NTF4/NFATC4/NPAS4/SRF/PTCHD1/SGK1/EIF2AK4
GOBP_CELL_PROLIFERATION_INVOLVED_IN_HEART_MORPHOGENESIS	GOBP_CELL_PROLIFERATION_INVOLVED_IN_HEART_MORPHOGENESIS	15	-0.486182	-1.52473	0.0318021	0.154385	0.122669	1518	tags=27%, list=5%, signal=25%	PIM1/SOX9/ISL1/NOTCH1
GOMF_CCR_CHEMOKINE_RECEPTOR_BINDING	GOMF_CCR_CHEMOKINE_RECEPTOR_BINDING	40	-0.378015	-1.51456	0.0318471	0.154486	0.12275	9463	tags=48%, list=30%, signal=33%	XCL1/CCL25/CCL27/CCL24/CCL11/CCL1/XCL2/CCL15/CXCL13/DEFB106A/CCL2/CCL26/CCL19/CCL14/CCL5/DEFB1/CCL21/CX3CL1/NES
GOBP_KERATINOCYTE_DIFFERENTIATION	GOBP_KERATINOCYTE_DIFFERENTIATION	273	-0.248546	-1.28818	0.031968	0.154838	0.123029	8193	tags=32%, list=26%, signal=24%	LCE2C/KRTAP24-1/KRTAP12-1/SERPINB13/KRTAP15-1/KRT79/SPRR1B/TRIM16/RUNX1/KRTAP6-1/KRT76/TCHH/KRTAP20-1/KRTAP4-11/KRTAP4-2/KRTAP9-8/EXPH5/KRTAP4-4/LCE2A/ADAM9/KRTAP1-5/KLK14/KRTAP13-3/DNASE1L2/VDR/KRTAP4-1/NCOA3/LCE6A/JAG1/SPRR2D/KRTAP19-1/CNFN/KRTAP10-1/KRTAP5-10/DSG4/KRT85/KRT4/PPL/LCE5A/KRTAP9-4/KRTAP2-1/LCE1B/LCE2B/AQP3/LCE1A/KRTAP6-3/KRT12/KRTAP10-3/KRT6A/LCE3E/KRTAP19-6/KRTAP3-2/KRTAP5-11/DSG…
GOBP_POSITIVE_REGULATION_OF_CELL_ADHESION	GOBP_POSITIVE_REGULATION_OF_CELL_ADHESION	406	-0.233491	-1.24484	0.031968	0.154838	0.123029	7750	tags=27%, list=25%, signal=21%	PLEKHA2/DISC1/CD3E/GCNT2/RUNX1/RET/SPTA1/RNASE10/PTK2B/TNFSF9/SDC4/SELP/ADAM19/MYADM/VWC2/RAG1/SART1/TMIGD2/ADAM9/AGER/KIF26B/NFKBID/MALT1/EGR3/PAK3/MYB/VIT/CCR7/PRKCQ/LIF/PTPRU/DNM2/FYN/SOX2/CXCL13/MIP/NR4A3/SFRP1/EPB41L5/KLRK1/APOA1/ICOSLG/BAG4/EFNB3/UNC13D/FGB/CCL2/ITPKB/FOXC2/CCL19/S100A10/TFE3/PRKD2/NFAT5/SELE/CD80/EGFLAM/FERMT1/IL7R/RRAS/VEGFA/TGM2/RARA/PPM1F/MIR21/SOX13/TPM1/BMP7/CEACAM6/L…
GOBP_NEGATIVE_REGULATION_OF_SMOOTH_MUSCLE_CELL_PROLIFERATION	GOBP_NEGATIVE_REGULATION_OF_SMOOTH_MUSCLE_CELL_PROLIFERATION	58	-0.355333	-1.52465	0.032059	0.155059	0.123204	13978	tags=60%, list=45%, signal=34%	MIR140/MIR223/IL15/MIR362/MIR137/NPR1/IFNG/OGN/MIR339/MIR503/MIR185/NDRG4/CDKN1A/MIR182/MIR15A/MIR1-1/PRKG1/TNFAIP3/MIR1298/MIR214/MIR34A/MIR638/PPARD/MFN2/MYOCD/IGFBP5/TPM1/NDRG2/EFEMP2/ADIPOQ/GSTP1/PPARGC1A/IL10/TGFB3/CNN1
GOBP_AXO_DENDRITIC_PROTEIN_TRANSPORT	GOBP_AXO_DENDRITIC_PROTEIN_TRANSPORT	13	-0.521884	-1.56451	0.0321046	0.155059	0.123204	455	tags=38%, list=1%, signal=38%	KIF5A/KIF5C/MAP1A/HNRNPU/MAPK8IP3
GOBP_RESPONSE_TO_POTASSIUM_ION	GOBP_RESPONSE_TO_POTASSIUM_ION	13	-0.522598	-1.56665	0.0321046	0.155059	0.123204	1387	tags=38%, list=4%, signal=37%	CYP11B1/GNRH1/DLG4/PPARGC1A/CACNA1H
GOBP_PYRIMIDINE_RIBONUCLEOTIDE_METABOLIC_PROCESS	GOBP_PYRIMIDINE_RIBONUCLEOTIDE_METABOLIC_PROCESS	27	0.282653	1.52027	0.0321103	0.155059	0.123204	2318	tags=22%, list=7%, signal=21%	CMPK1/UPRT/NME5/NME7/UCK2/NME1
GOBP_KETONE_BODY_METABOLIC_PROCESS	GOBP_KETONE_BODY_METABOLIC_PROCESS	12	0.418354	1.62265	0.0321613	0.155188	0.123307	3340	tags=42%, list=11%, signal=37%	AACS/OXCT1/ACAT1/SLC27A5/HMGCS2
GOBP_ESTABLISHMENT_OF_CELL_POLARITY	GOBP_ESTABLISHMENT_OF_CELL_POLARITY	126	-0.28421	-1.37675	0.0322906	0.155695	0.12371	5564	tags=25%, list=18%, signal=21%	MAP4/CCR7/HTT/LLGL1/CRB1/AMOT/INSC/KIF25/CYTH1/SPRY2/CCL19/AMOTL2/FERMT1/PTK7/TCIRG1/NUMA1/BRSK2/RUFY3/MYO18A/EPHB1/SPRY1/MSN/MYO9A/PAK1/GATA3/CLASP1/NDE1/JAM3/FOXF1/CCL21/BRSK1/PKD1
GOBP_REGULATION_OF_LEUKOCYTE_CHEMOTAXIS	GOBP_REGULATION_OF_LEUKOCYTE_CHEMOTAXIS	109	-0.296162	-1.40664	0.0323232	0.1557	0.123714	6125	tags=29%, list=20%, signal=24%	CAMK1D/CCL1/IL34/PGF/XCL2/CCR7/CXCL13/ZNF580/ANO6/KLRK1/IL6R/CCL2/EDN1/CCL19/CXCL17/PADI2/VEGFA/EDN2/ADAM17/C5/CCL5/EDN3/DUSP1/PTN/NBL1/RARRES2/SLIT2/JAM3/SERPINE1/CCL21/IL6/MST1
GOBP_PURINE_CONTAINING_COMPOUND_TRANSMEMBRANE_TRANSPORT	GOBP_PURINE_CONTAINING_COMPOUND_TRANSMEMBRANE_TRANSPORT	17	0.353417	1.57506	0.0323747	0.1557	0.123714	3771	tags=41%, list=12%, signal=36%	SLC25A5/SLC35B2/SLC35B3/SLC25A17/SLC25A4/SLC19A1/SLC25A6
GOMF_PEPTIDE_TRANSMEMBRANE_TRANSPORTER_ACTIVITY	GOMF_PEPTIDE_TRANSMEMBRANE_TRANSPORTER_ACTIVITY	34	0.262172	1.49268	0.0324059	0.1557	0.123714	2027	tags=15%, list=6%, signal=14%	TMED10/SEC61G/TOMM20/TIMM23/ABCA1
GOBP_REGULATION_OF_HISTONE_UBIQUITINATION	GOBP_REGULATION_OF_HISTONE_UBIQUITINATION	11	0.44839	1.67202	0.0324219	0.1557	0.123714	11914	tags=91%, list=38%, signal=56%	UBE2N/PARK7/CTR9/TRIP12/UBR5/WDR70/RNF20/OTUB2/OTUB1/CDK9
GOCC_G_PROTEIN_BETA_GAMMA_SUBUNIT_COMPLEX	GOCC_G_PROTEIN_BETA_GAMMA_SUBUNIT_COMPLEX	11	0.450386	1.67946	0.0324219	0.1557	0.123714	852	tags=27%, list=3%, signal=27%	GNG10/GNG12/GNG5
GOBP_REGULATION_OF_ENDOPLASMIC_RETICULUM_STRESS_INDUCED_INTRINSIC_APOPTOTIC_SIGNALING_PATHWAY	GOBP_REGULATION_OF_ENDOPLASMIC_RETICULUM_STRESS_INDUCED_INTRINSIC_APOPTOTIC_SIGNALING_PATHWAY	28	0.303081	1.6203	0.0325135	0.1557	0.123714	1861	tags=18%, list=6%, signal=17%	XBP1/NCK1/ERP29/PARK7/EIF2AK3
GOBP_CENTRAL_NERVOUS_SYSTEM_NEURON_AXONOGENESIS	GOBP_CENTRAL_NERVOUS_SYSTEM_NEURON_AXONOGENESIS	32	-0.407744	-1.55923	0.0325205	0.1557	0.123714	2698	tags=25%, list=9%, signal=23%	SPTBN4/MYCBP2/PLXNA4/EPHB1/NR4A2/NFIB/SLIT2/EPHB6
GOCC_TRAPP_COMPLEX	GOCC_TRAPP_COMPLEX	10	0.474315	1.71768	0.0325223	0.1557	0.123714	16506	tags=100%, list=53%, signal=47%	TRAPPC4/TRAPPC5/TRAPPC6A/TRAPPC6B/TRAPPC1/TRAPPC2/TRAPPC3/TRAPPC2L/TRAPPC9/TRAPPC10
GOBP_PRESYNAPTIC_ENDOCYTOSIS	GOBP_PRESYNAPTIC_ENDOCYTOSIS	59	-0.34084	-1.46661	0.0325289	0.1557	0.123714	7428	tags=37%, list=24%, signal=29%	BTBD9/BTBD8/LRRK2/SNCB/STX1A/DNM1/NLGN1/DNM2/SLC2A4/DNM3/SYT11/PPP3CB/VAMP2/STON1/SNCG/MX2/NLGN3/CEL/SH3GL2/NLGN2/PIP5K1C/MX1
GOBP_FC_RECEPTOR_MEDIATED_STIMULATORY_SIGNALING_PATHWAY	GOBP_FC_RECEPTOR_MEDIATED_STIMULATORY_SIGNALING_PATHWAY	82	0.187635	1.35386	0.0325347	0.1557	0.123714	4363	tags=34%, list=14%, signal=29%	ARPC3/PIK3CB/NCK1/ACTG1/FCER1G/NCKAP1/ARPC1B/ACTR2/ACTR3/ARPC5/HSP90AB1/LYN/YES1/CDC42/APPL2/ARPC1A/ARPC4/HSP90AA1/CYFIP1/FCGR1A/WASL/CRK/CSK/CYFIP2/SYK/MAPK1/FCGR2A/CD47
GOCC_ORGANELLE_MEMBRANE_CONTACT_SITE	GOCC_ORGANELLE_MEMBRANE_CONTACT_SITE	30	0.293051	1.60468	0.0325654	0.155731	0.123738	17832	tags=93%, list=57%, signal=40%	STARD3NL/TOMM20/PIK3R4/CANX/RAB32/TOMM40/BCAP31/SACM1L/TMEM41B/PDZD8/GRAMD1C/GRAMD1A/AHCYL1/TMCC1/C2CD2L/CLCC1/STX17/SERAC1/OSBPL1A/BCL2L10/STARD3/FATE1/ACSL4/ZFYVE1/MBOAT7/OSBPL5/ATG5/MOSPD2
GOBP_NEGATIVE_REGULATION_OF_NITRIC_OXIDE_METABOLIC_PROCESS	GOBP_NEGATIVE_REGULATION_OF_NITRIC_OXIDE_METABOLIC_PROCESS	17	-0.472702	-1.53233	0.0327103	0.156307	0.124196	1358	tags=29%, list=4%, signal=28%	ZC3H12A/CAV1/ATP2B4/IL10/PTGIS
GOBP_POSITIVE_REGULATION_OF_CELL_SUBSTRATE_JUNCTION_ORGANIZATION	GOBP_POSITIVE_REGULATION_OF_CELL_SUBSTRATE_JUNCTION_ORGANIZATION	30	-0.405076	-1.53027	0.0327869	0.156556	0.124394	4757	tags=30%, list=15%, signal=25%	DUSP3/SFRP1/EPB41L5/S100A10/VEGFA/PPM1F/SMAD3/FERMT2/COL16A1
GOBP_POSITIVE_REGULATION_OF_PROTEIN_IMPORT	GOBP_POSITIVE_REGULATION_OF_PROTEIN_IMPORT	38	-0.376804	-1.49355	0.0329437	0.157127	0.124848	2436	tags=21%, list=8%, signal=19%	BAG3/CHP2/ZC3H12A/TARDBP/GLI3/SMAD3/LEP/FLNA
GOBP_REGULATION_OF_ATTACHMENT_OF_SPINDLE_MICROTUBULES_TO_KINETOCHORE	GOBP_REGULATION_OF_ATTACHMENT_OF_SPINDLE_MICROTUBULES_TO_KINETOCHORE	12	0.417228	1.61829	0.0329703	0.157127	0.124848	2559	tags=42%, list=8%, signal=38%	ECT2/BECN1/RACGAP1/AURKB/CDC42
GOBP_COLLAGEN_ACTIVATED_SIGNALING_PATHWAY	GOBP_COLLAGEN_ACTIVATED_SIGNALING_PATHWAY	15	-0.485274	-1.52188	0.03298	0.157127	0.124848	4475	tags=40%, list=14%, signal=34%	COL4A1/MUSK/COL4A6/COL4A5/COL4A2/DDR2
GOBP_REGULATION_OF_NEURON_DIFFERENTIATION	GOBP_REGULATION_OF_NEURON_DIFFERENTIATION	176	-0.268979	-1.34095	0.0330661	0.15742	0.125081	8357	tags=34%, list=27%, signal=25%	HOXD3/TUG1/KCTD11/FGFR1/ASCL1/DIO3/PBX1/TIMP2/SH3GL3/TGIF2/RET/S1PR5/CASZ1/TLX3/CDK5RAP2/VWC2/LRRK2/CDK5RAP3/HES3/NLGN1/DDX6/NEUROD1/JAG1/TBX6/TIAM1/SOX2/GDF11/FEZF1/SFRP1/IRX3/NEUROG3/ZFHX2/ZNF536/NTF3/BCL11A/NTF4/HOXA2/DKK1/BMP7/ETV5/GPRC5B/BCL2/MEIS1/SOX9/BIN1/RNF112/DLL1/GLI3/WNT3A/ZFHX3/TCF4/ARHGEF2/NBL1/ISL1/NOTCH1/DUOXA1/BCL6/EIF2AK4/PCP4
GOBP_ENDOSOME_TO_LYSOSOME_TRANSPORT	GOBP_ENDOSOME_TO_LYSOSOME_TRANSPORT	48	0.24004	1.40511	0.0332807	0.158324	0.125799	3341	tags=31%, list=11%, signal=28%	CHMP5/VAMP7/CHMP2B/CHMP3/TSG101/SNAPIN/SCYL2/VPS4B/ADRB2/MTM1/STX8/M6PR/VCP/DTX3L/UBXN6
GOMF_HYDROLASE_ACTIVITY_HYDROLYZING_O_GLYCOSYL_COMPOUNDS	GOMF_HYDROLASE_ACTIVITY_HYDROLYZING_O_GLYCOSYL_COMPOUNDS	85	0.195645	1.41664	0.0334752	0.159132	0.126441	16707	tags=82%, list=53%, signal=39%	LYZ/EDEM1/SI/KL/GBE1/GNE/CTBS/GLA/AMY1C/EDEM2/GUSB/FUCA1/FUCA2/GLB1/NAGA/PSAP/ABHD10/HYAL3/LYG2/GBA/MAN1B1/MOGS/HEXB/GM2A/GALC/CHIT1/AMY1A/EDEM3/GANAB/MAN1A2/MANEA/GBA2/MAN1C1/GLB1L2/ACER2/MANBA/MAN2B1/MAN2B2/HEXA/HYAL2/NEU3/LYZL4/NAGPA/LYZL2/MANEAL/SPACA5/ACER3/LCTL/GLB1L/TREH/PARG/HPSE/GANC/NEU4/AMY1B/LCT/GLB1L3/KLB/SPAM1/MAN2A2/AGL/NAGLU/MAN1A1/MGAM/MAN2A1/GAA/HYAL1/GBA3/CHIA/ACER1
GOBP_REGULATION_OF_BONE_REMODELING	GOBP_REGULATION_OF_BONE_REMODELING	49	-0.355975	-1.48458	0.0335782	0.159503	0.126735	5815	tags=29%, list=19%, signal=23%	PPARGC1B/TNFAIP3/SFRP1/SIGLEC15/NF1/CALCA/MC4R/CARTPT/CD38/PRKCA/IL6/LEP/TF/PDK4
GOBP_RETINA_MORPHOGENESIS_IN_CAMERA_TYPE_EYE	GOBP_RETINA_MORPHOGENESIS_IN_CAMERA_TYPE_EYE	56	-0.348775	-1.48926	0.0336488	0.159639	0.126844	4963	tags=29%, list=16%, signal=24%	CRB1/CABP4/OBSL1/RP1/RPE65/MEGF11/RORB/RBP4/SOX9/DLL1/PTN/SDK2/HIPK2/RDH13/AHI1/PROM1
GOCC_CIS_GOLGI_NETWORK	GOCC_CIS_GOLGI_NETWORK	49	0.236798	1.42386	0.0336567	0.159639	0.126844	1246	tags=14%, list=4%, signal=14%	TMED10/KDELR2/TMED5/KDELR3/YIPF6/IFT20/GOLGA5
GOMF_FAD_BINDING	GOMF_FAD_BINDING	32	-0.396912	-1.51781	0.0336957	0.159701	0.126893	2200	tags=22%, list=7%, signal=20%	QSOX1/CRY2/PRODH/D2HGDH/AOX1/MICAL1/ACOX2
GOMF_SH2_DOMAIN_BINDING	GOMF_SH2_DOMAIN_BINDING	37	-0.376489	-1.49378	0.0337197	0.159701	0.126893	6494	tags=32%, list=21%, signal=26%	CCDC88A/AFAP1/ARHGAP5/SH2B2/INPPL1/DLC1/BLNK/LAX1/LILRB1/IRS1/AFAP1L2/SH3PXD2B
GOBP_PORE_COMPLEX_ASSEMBLY	GOBP_PORE_COMPLEX_ASSEMBLY	18	0.327232	1.51958	0.0337622	0.159785	0.126959	2918	tags=39%, list=9%, signal=35%	CCT8/BAD/ADAM10/RTN4/CCT3/NUP205/NUP153
GOBP_NEGATIVE_REGULATION_OF_PROGRAMMED_NECROTIC_CELL_DEATH	GOBP_NEGATIVE_REGULATION_OF_PROGRAMMED_NECROTIC_CELL_DEATH	17	-0.471111	-1.52717	0.0338785	0.160074	0.127189	5084	tags=41%, list=16%, signal=35%	MIR221/MIR214/RIPK1/CAV1/ARHGEF2/FZD9/BIRC3
GOBP_REGULATION_OF_RESPONSE_TO_FOOD	GOBP_REGULATION_OF_RESPONSE_TO_FOOD	17	-0.488216	-1.58262	0.0338981	0.160074	0.127189	1447	tags=24%, list=5%, signal=22%	CARTPT/NPY/LEP/CCK
GOBP_REGULATION_OF_VASCULAR_PERMEABILITY	GOBP_REGULATION_OF_VASCULAR_PERMEABILITY	41	-0.372032	-1.4997	0.0338983	0.160074	0.127189	2864	tags=29%, list=9%, signal=27%	PDE2A/BDKRB2/C2CD4B/VEGFA/ADORA2A/RAMP2/ANGPT1/SH3GL2/SLIT2/FERMT2/CLDN5/CEACAM1
GOBP_DETECTION_OF_CHEMICAL_STIMULUS	GOBP_DETECTION_OF_CHEMICAL_STIMULUS	446	-0.229784	-1.23224	0.033966	0.160276	0.12735	21935	tags=87%, list=70%, signal=27%	OR7A17/OR2T11/OR13A1/OR5T3/OR4E2/OR5B17/OR52D1/OR13D1/OR51Q1/CA6/OR52N2/OR2L3/GNAT2/TLR4/OR6C4/OR2F2/OR51S1/OR1A2/OR51G2/OR6B3/TAS2R7/OR4D6/OR8D4/OR2K2/OR5AU1/OR13J1/OR5H1/OR5D13/OR5B12/CASR/OR10G7/CASQ2/OR1G1/CALM1/OR51E1/OR1L6/TAS2R43/OR52A1/OR4D9/OR52I2/OR8D2/GPR148/OR5H6/OR6K3/OR4C16/OR11H12/OR10G8/OR9A4/OR5H2/OR13G1/OR14J1/OR2M5/OR8K1/OR4K1/OR10S1/OR10Z1/OR4P4/OR6Q1/OR8B4/OR4Q3/OR8B8/OR6C76/…
GOCC_INTRINSIC_COMPONENT_OF_PEROXISOMAL_MEMBRANE	GOCC_INTRINSIC_COMPONENT_OF_PEROXISOMAL_MEMBRANE	14	0.396119	1.66239	0.0340602	0.160521	0.127545	2276	tags=36%, list=7%, signal=33%	SLC27A2/SLC25A17/PEX11B/FIS1/PEX11A
GOBP_REGULATION_OF_SYNAPTIC_PLASTICITY	GOBP_REGULATION_OF_SYNAPTIC_PLASTICITY	166	-0.270795	-1.34413	0.0340681	0.160521	0.127545	6413	tags=28%, list=20%, signal=22%	ANAPC2/SERPINE2/KAT2A/AGER/NLGN1/ARC/EPHA4/INS/GRID2/MECP2/RASGRF1/AKAP5/RIMS2/UNC13C/SYNGR1/CRTC1/SORCS3/PRRT1/GRIN2A/PPP3CB/VAMP2/CAMK2B/PICK1/ADORA2A/NFATC4/CREB1/ITPKA/NPAS4/RIMS3/SRF/ITPR3/PTN/CD38/JPH4/MPP2/SORCS2/KCNB1/TSHZ3/PRRT2/DLG4/MAP1A/SHANK3/EIF2AK4/BRSK1/CX3CL1/FAM107A
GOBP_MYOBLAST_DIFFERENTIATION	GOBP_MYOBLAST_DIFFERENTIATION	76	-0.324354	-1.45141	0.0341615	0.160843	0.1278	8386	tags=38%, list=27%, signal=28%	ID3/MYF6/MYF5/HIF1AN/EPAS1/ANKRD2/CAPN3/JAG1/CMTM5/MYOD1/DDIT3/PITX1/DDX17/PPARD/TBX3/TCF7L2/MYOCD/EID2B/PRICKLE1/TBX2/KCNAB1/SOX9/BOC/SRF/DLL1/ISL1/NOTCH1/SOX15/IL18
GOCC_CELL_TRAILING_EDGE	GOCC_CELL_TRAILING_EDGE	12	-0.536725	-1.56802	0.0342298	0.161046	0.127962	4801	tags=42%, list=15%, signal=35%	SELPLG/PIP5K1B/MSN/SPN/PIP5K1C
GOBP_REGULATION_OF_CELLULAR_RESPONSE_TO_TRANSFORMING_GROWTH_FACTOR_BETA_STIMULUS	GOBP_REGULATION_OF_CELLULAR_RESPONSE_TO_TRANSFORMING_GROWTH_FACTOR_BETA_STIMULUS	124	-0.284568	-1.37368	0.0343782	0.161625	0.128422	2299	tags=18%, list=7%, signal=17%	HTRA1/FERMT1/BCL9L/MYOCD/ADAMTSL2/MIR21/ADAM17/SPRY1/WFIKKN1/ITGA3/CAV1/FBN2/HIPK2/IL17RD/SPINT3/SMAD3/EMILIN1/CFLAR/TGFB1I1/LTBP4/TGFB3/TGFBR3
GOCC_CYTOPLASMIC_SIDE_OF_ENDOPLASMIC_RETICULUM_MEMBRANE	GOCC_CYTOPLASMIC_SIDE_OF_ENDOPLASMIC_RETICULUM_MEMBRANE	14	0.39494	1.65744	0.0345113	0.162014	0.12873	2936	tags=43%, list=9%, signal=39%	SPPL2A/RPS26/RPL27/DNAJA1/RPS29/RPS28
GOMF_TRNA_SPECIFIC_RIBONUCLEASE_ACTIVITY	GOMF_TRNA_SPECIFIC_RIBONUCLEASE_ACTIVITY	14	0.394887	1.65722	0.0345113	0.162014	0.12873	3146	tags=36%, list=10%, signal=32%	POP7/RPP40/POP4/RPP21/TSEN34
GOBP_SKELETAL_MUSCLE_CELL_PROLIFERATION	GOBP_SKELETAL_MUSCLE_CELL_PROLIFERATION	14	-0.505581	-1.54138	0.0346476	0.162333	0.128984	2865	tags=36%, list=9%, signal=32%	PPARD/FGF2/EPHB1/ANGPT1/CFLAR
GOBP_RESPONSE_TO_LEUCINE	GOBP_RESPONSE_TO_LEUCINE	11	-0.547297	-1.54688	0.0346535	0.162333	0.128984	2622	tags=27%, list=8%, signal=25%	RPTOR/SESN2/PPARGC1A
GOBP_RESPONSE_TO_INTERFERON_ALPHA	GOBP_RESPONSE_TO_INTERFERON_ALPHA	20	-0.451919	-1.53897	0.0346554	0.162333	0.128984	11226	tags=65%, list=36%, signal=42%	STAR/IFNAR1/PYHIN1/IFIT3/TPR/GAS6/LAMP3/AXL/EIF2AK2/MX2/GATA3/IFITM1/BST2
GOBP_REGULATION_OF_HELICASE_ACTIVITY	GOBP_REGULATION_OF_HELICASE_ACTIVITY	11	0.44546	1.6611	0.034724	0.162536	0.129145	8240	tags=82%, list=26%, signal=60%	SSBP1/MNAT1/MCM2/MSH6/SIRT1/POT1/MSH3/GTF2H2/TP53
GOBP_RENAL_TUBULE_DEVELOPMENT	GOBP_RENAL_TUBULE_DEVELOPMENT	90	-0.306962	-1.41478	0.0347648	0.162608	0.129203	5523	tags=27%, list=18%, signal=22%	JAG1/LIF/KLHL3/IRX3/COL4A1/SMO/LAMA5/WNT2B/SIX2/FGF2/VEGFA/BCL2/GATA3/SOX9/DLL1/GLI3/OSR1/NOTCH1/DCHS1/PKD1/WNK4/AHI1/HOXD11/PROM1
GOBP_POSITIVE_REGULATION_OF_RECEPTOR_INTERNALIZATION	GOBP_POSITIVE_REGULATION_OF_RECEPTOR_INTERNALIZATION	24	-0.437469	-1.55705	0.0349493	0.163351	0.129794	2861	tags=29%, list=9%, signal=27%	NTF3/SELE/PICK1/VEGFA/ANGPT1/WNT3A/AHI1
GOCC_PERIKARYON	GOCC_PERIKARYON	144	-0.275965	-1.35227	0.0352467	0.164244	0.130503	4927	tags=22%, list=16%, signal=18%	HTR5A/RTN4RL1/EFNA2/FCHSD1/KCNE3/NPPA/OPN4/RCVRN/HDAC6/GAP43/PDE9A/SYT11/GRIK5/CPNE6/KCNB2/RUFY3/NGFR/CACNA1C/GNRH1/KCNAB1/RNF112/SORCS2/KCNB1/SLC2A3/CRYAB/ENO2/PENK/DMWD/CCK/FLNA/ITGA8
GOBP_DOUBLE_STRAND_BREAK_REPAIR_VIA_BREAK_INDUCED_REPLICATION	GOBP_DOUBLE_STRAND_BREAK_REPAIR_VIA_BREAK_INDUCED_REPLICATION	10	0.470414	1.70355	0.0353049	0.164244	0.130503	9462	tags=90%, list=30%, signal=63%	MCM4/MCM2/MCM5/GINS2/MCM6/MCM3/GINS4/CDC7/MCM7
GOCC_CMG_COMPLEX	GOCC_CMG_COMPLEX	10	0.470232	1.70289	0.0353049	0.164244	0.130503	9462	tags=90%, list=30%, signal=63%	MCM4/GINS3/MCM2/MCM5/GINS2/MCM6/MCM3/GINS4/MCM7
GOCC_DNA_REPLICATION_PREINITIATION_COMPLEX	GOCC_DNA_REPLICATION_PREINITIATION_COMPLEX	10	0.470232	1.70289	0.0353049	0.164244	0.130503	9462	tags=90%, list=30%, signal=63%	MCM4/GINS3/MCM2/MCM5/GINS2/MCM6/MCM3/GINS4/MCM7
GOMF_CARBON_SULFUR_LYASE_ACTIVITY	GOMF_CARBON_SULFUR_LYASE_ACTIVITY	10	0.47082	1.70502	0.0353049	0.164244	0.130503	3011	tags=40%, list=10%, signal=36%	GLO1/MGST3/MGST2/ALOX5AP
[truncated: 195 more rows]
