# Supplementary material for: Comprehensive analysis of integrin αvβ3/α6β1 in prognosis and immune escape of prostate cancer
Source: Aging (Albany NY). 2023 Oct 19;15(20):11369–88. doi: 10.18632/aging.205131 (PMC10637796; doi:10.18632/aging.205131)
Supplement: Supplementary Table 3 [file aging-15-205131-s004.xlsx]

## Sheet: GSEA.result
Supplementary Table 3. KEGG enrichment analysis for two risk groups in TCGA cohort.
ID	Description	setSize	enrichmentScore	NES	pvalue	p.adjust	qvalues	rank	leading_edge	core_enrichment
KEGG_GLYCEROPHOSPHOLIPID_METABOLISM	KEGG_GLYCEROPHOSPHOLIPID_METABOLISM	77	0.441788	1.59983	6.03519e-05	0.010803	0.00870338	6732	tags=55%, list=36%, signal=35%	PLA2G2F/GPD1/PLA2G10/ACHE/LCAT/GPAT3/JMJD7-PLA2G4B/MBOAT1/LPCAT4/PLA2G15/GPAM/DGKE/DGKA/TAZ/CHKB/DGKG/GPD2/PCYT1A/DGKZ/PLPP3/PLA2G6/CHKA/CDS1/GPAT4/DGKD/AGPAT3/CHPT1/PLA2G4A/PLA2G12A/LCLAT1/GNPAT/PLD2/PLA2G1B/AGPAT2/ADPRM/PCYT2/PTDSS1/PGS1/LYPLA2/LYPLA1/PEMT/PTDSS2
KEGG_REGULATION_OF_AUTOPHAGY	KEGG_REGULATION_OF_AUTOPHAGY	29	-0.357219	-2.0109	0.000866545	0.0642542	0.0517661	638	tags=31%, list=3%, signal=30%	IFNA6/BECN2/IFNA4/IFNA1/INS/IFNA5/IFNA13/IFNA16/IFNA7
KEGG_ENDOCYTOSIS	KEGG_ENDOCYTOSIS	181	0.348354	1.33768	0.00107689	0.0642542	0.0517661	9960	tags=64%, list=53%, signal=30%	ADRB3/CXCR1/SH3GL3/CXCR2/IQSEC3/GRK1/PSD/TFRC/RAB11FIP1/GRK5/KIT/ADRB2/HSPA1L/RAB5C/PRKCZ/RBSN/IQSEC1/PSD4/ACAP3/MVB12B/LDLRAP1/GRK4/AP2A2/RAB11FIP5/GIT2/RAB11FIP2/DNM1/EPN1/HLA-C/ARRB1/SMURF1/RUFY1/ACAP2/CLTB/PARD6B/AP2B1/CHMP5/CLTC/CSF1R/ARAP2/SH3GL1/VPS4A/CHMP3/AP2M1/NEDD4/RABEP1/EHD1/USP8/RNF41/CBLB/GRK2/HSPA1A/EGFR/AP2S1/TSG101/STAM2/HLA-A/VPS37B/PSD3/SH3KBP1/RAB22A/SH3GLB1/CHMP1B/EHD3/SMAP2…
KEGG_PATHWAYS_IN_CANCER	KEGG_PATHWAYS_IN_CANCER	319	0.317034	1.24239	0.0022754	0.101824	0.0820341	11037	tags=67%, list=59%, signal=28%	WNT6/MMP1/NOS2/PAX8/FGF9/IL6/ITGA2/CDKN2A/ITGA2B/FLT3LG/TGFB3/COL4A6/AXIN2/WNT9B/APC2/LAMA1/SHH/PIK3CD/KIT/ERBB2/CCNE1/MAPK10/TGFA/MAPK3/FZD3/FGF7/ARAF/STAT5A/WNT8B/STAT5B/CDK4/SUFU/MECOM/RARA/PTCH1/RUNX1T1/RASSF1/NRAS/STK36/MLH1/RXRA/PDGFB/RALB/CDK6/MSH3/PLCG2/LAMA5/CTNNA1/CRKL/PIK3R3/CCNA1/CSF1R/RASSF5/WNT3/RAC2/ARNT/COL4A4/MSH2/TPR/CBLB/FZD4/HSP90AB1/EGFR/EP300/RUNX1/DVL2/PPARD/SOS1/RALA/SKP2/…
KEGG_CELL_CYCLE	KEGG_CELL_CYCLE	124	0.370877	1.39489	0.00297835	0.106625	0.085902	8430	tags=57%, list=45%, signal=32%	WEE2/CDKN2A/TGFB3/ORC1/PKMYT1/PLK1/CCNE1/CDC25B/CDKN2D/E2F4/CDK4/RBL1/CDC25C/ANAPC1/CDK6/CDC26/CCNA1/ANAPC11/STAG1/CCNA2/CDC25A/SKP1/CDC6/EP300/CCNB2/SMC3/ORC2/SKP2/CDC7/HDAC2/YWHAB/YWHAG/GADD45A/CDKN1C/CHEK1/ORC5/CREBBP/TGFB2/MAD1L1/HDAC1/CDC23/YWHAQ/MCM4/DBF4/CDKN1A/RB1/ANAPC2/ATM/CDC14A/TTK/CUL1/CDC16/YWHAE/E2F2/ORC6/SMAD4/CDKN2B/CHEK2/E2F1/PRKDC/CCNE2/MCM5/CCND3/BUB3/MAD2L1/MCM7/CCND1/MCM2/SM…
KEGG_RETINOL_METABOLISM	KEGG_RETINOL_METABOLISM	55	0.421198	1.49054	0.00511423	0.142259	0.11461	3155	tags=36%, list=17%, signal=30%	CYP2A7/UGT1A8/ADH1A/LRAT/CYP1A1/UGT1A1/UGT2B7/CYP3A5/ADH4/ADH6/CYP3A43/CYP3A7/RDH5/ALDH1A2/CYP26B1/RDH11/BCO1/DHRS4/ADH1C/DHRS3
KEGG_SNARE_INTERACTIONS_IN_VESICULAR_TRANSPORT	KEGG_SNARE_INTERACTIONS_IN_VESICULAR_TRANSPORT	38	0.446245	1.51712	0.00634057	0.142259	0.11461	5771	tags=45%, list=31%, signal=31%	STX1B/GOSR2/YKT6/VAMP5/GOSR1/STX16/BET1L/SNAP23/STX12/VAMP3/SEC22B/VTI1B/SNAP29/BNIP1/TSNARE1/STX17/STX2
KEGG_T_CELL_RECEPTOR_SIGNALING_PATHWAY	KEGG_T_CELL_RECEPTOR_SIGNALING_PATHWAY	108	0.364209	1.35585	0.00635793	0.142259	0.11461	9709	tags=66%, list=52%, signal=32%	CHP2/LAT/PRKCQ/TNF/CD3G/RASGRP1/PAK1/PIK3CD/ZAP70/ICOS/NFATC4/MAPK3/CTLA4/NFATC3/MAP2K7/CDK4/NRAS/VAV2/PAK4/PIK3R3/FYN/CD4/CD3D/CHP1/PPP3CB/CBLB/MAPK12/SOS1/MALT1/MAPK13/GRB2/LCK/NFATC2/NCK2/PTPN6/DLG1/MAPK14/KRAS/CD3E/PTPRC/RELA/PIK3CA/PAK2/PPP3CC/NFKBIB/CD8B/NFKBIA/IL5/ITK/NFAT5/PDCD1/CBL/NCK1/NFKB1/IKBKB/PIK3R2/MAP3K14/IKBKG/PPP3R1/IFNG/PIK3CG/FOS/CARD11/PIK3CB/AKT1/CDC42/MAP2K2/MAPK11/NFATC1/…
KEGG_O_GLYCAN_BIOSYNTHESIS	KEGG_O_GLYCAN_BIOSYNTHESIS	28	0.487517	1.58784	0.00717776	0.142758	0.115012	7470	tags=68%, list=40%, signal=41%	GALNT8/GALNTL6/GALNT15/GALNT12/GALNT9/GALNT10/GALNT16/ST3GAL2/GCNT3/GALNT11/GALNT1/ST6GALNAC1/ST3GAL1/GALNT3/C1GALT1/GALNT18/GCNT1/GALNT13/B3GNT6
KEGG_CHEMOKINE_SIGNALING_PATHWAY	KEGG_CHEMOKINE_SIGNALING_PATHWAY	185	0.323894	1.24435	0.0123303	0.178821	0.144066	9083	tags=56%, list=49%, signal=29%	CXCR5/GNG8/CXCR1/CCR9/CXCL5/CCL23/GNG3/CXCR2/ADCY7/GRK1/CCR2/CCL26/CCL8/CXCL2/GRK5/CCL22/PAK1/PIK3CD/PLCB4/STAT2/TIAM1/PRKCZ/MAPK3/CCL25/CCL24/GRK4/STAT5B/ADCY4/GNGT2/CXCR3/NRAS/PTK2B/ARRB1/CCR4/VAV2/CXCL12/SHC1/CRKL/PIK3R3/SHC2/RAC2/GNAI3/GRK2/CCL2/PREX1/CXCL3/SOS1/FGR/RAC1/CCL21/CXCL13/GNB1/GRB2/STAT1/CCL20/JAK2/PRKCD/CCL4/PRKX/PLCB1/GRK3/KRAS/CXCL10/RAP1B/GNG11/LYN/RELA/CCL19/PIK3CA/CXCL9/JAK3…
KEGG_EPITHELIAL_CELL_SIGNALING_IN_HELICOBACTER_PYLORI_INFECTION	KEGG_EPITHELIAL_CELL_SIGNALING_IN_HELICOBACTER_PYLORI_INFECTION	68	0.376088	1.34794	0.0170233	0.178821	0.144066	9709	tags=68%, list=52%, signal=33%	CXCR1/CXCR2/ATP6V0A4/TCIRG1/PAK1/HBEGF/MAPK10/JAM3/ADAM17/PLCG2/ATP6V1D/ATP6V0E2/ATP6V0A1/ATP6V1A/ATP6V1H/ADAM10/ATP6V1E2/ATP6V0C/MAPK12/EGFR/RAC1/MAP2K4/MAPK13/PTPN11/MAPK14/ATP6V1C1/LYN/RELA/GIT1/SRC/ATP6V0D2/NFKBIA/JAM2/NFKB1/ATP6V0E1/NOD1/IKBKB/ATP6V1G2/MAP3K14/IKBKG/ATP6V1F/CXCL1/CDC42/ATP6V1E1/MAPK11/MAPK9
KEGG_CHRONIC_MYELOID_LEUKEMIA	KEGG_CHRONIC_MYELOID_LEUKEMIA	73	0.378206	1.36391	0.0173072	0.178821	0.144066	9278	tags=66%, list=50%, signal=33%	CDKN2A/TGFB3/PIK3CD/MAPK3/ARAF/STAT5A/STAT5B/CDK4/MECOM/NRAS/CDK6/SHC1/GAB2/CRKL/PIK3R3/SHC2/CBLB/RUNX1/SOS1/GRB2/HDAC2/PTPN11/TGFB2/HDAC1/CDKN1A/KRAS/CTBP2/RB1/RELA/PIK3CA/CRK/TGFBR1/E2F2/NFKBIA/SMAD4/E2F1/CBL/NFKB1/IKBKB/CCND1/PIK3R2/IKBKG/BAD/PIK3CG/SHC4/PIK3CB/AKT1/MAP2K2
KEGG_ALZHEIMERS_DISEASE	KEGG_ALZHEIMERS_DISEASE	151	0.332783	1.26737	0.019075	0.178821	0.144066	9154	tags=58%, list=49%, signal=30%	CALML5/CHP2/COX6A2/GRIN2B/NOS1/SNCA/GRIN1/RYR3/ATP2A1/LPL/TNF/PLCB4/MAPK3/GRIN2D/CAPN1/ATP2A3/APBB1/NDUFS6/NAE1/BACE2/CDK5/NCSTN/ADAM17/NDUFS8/HSD17B10/PSEN1/NDUFA10/UQCRQ/CHP1/COX7A1/NDUFC1/PPP3CB/ERN1/MAPT/MME/ADAM10/CALM2/APH1A/NDUFA6/NDUFS3/NDUFB7/COX7C/COX6B1/NDUFA8/GAPDH/MT-CO1/NDUFB9/NDUFA9/COX5B/MT-ATP6/PLCB1/CYCS/FAS/COX8A/NDUFA5/CASP8/COX7A2L/NDUFB1/UQCRFS1/NDUFB4/NDUFV3/NDUFB8/COX6A1/C…
KEGG_AXON_GUIDANCE	KEGG_AXON_GUIDANCE	129	0.336936	1.26911	0.0202765	0.178821	0.144066	10026	tags=60%, list=54%, signal=28%	CHP2/DPYSL5/EPHA5/SLIT1/NTN3/NGEF/NTN1/PLXNA3/PAK1/EPHA1/SEMA4F/NFATC4/SLIT3/MAPK3/NFATC3/EPHA4/EPHA7/SEMA3B/SEMA3F/ABLIM3/SEMA4B/NRAS/CDK5/CXCL12/SEMA4D/RASA1/LRRC4C/PAK4/FYN/RAC2/CFL2/CHP1/PPP3CB/GNAI3/ABLIM1/RAC1/NRP1/NFATC2/RAC3/NCK2/SRGAP1/KRAS/SEMA3C/SEMA5A/PAK2/PPP3CC/ROBO2/SRGAP3/NFAT5/EPHA8/PLXNB3/NCK1/RND1/SLIT2/NTNG1/EPHB2/PPP3R1/SEMA4A/PLXNC1/SEMA6A/EFNB3/ROCK2/CFL1/SEMA5B/EFNA2/CDC42…
KEGG_ACUTE_MYELOID_LEUKEMIA	KEGG_ACUTE_MYELOID_LEUKEMIA	57	0.384757	1.36223	0.0233973	0.178821	0.144066	9278	tags=68%, list=50%, signal=34%	PIK3CD/KIT/MAPK3/ARAF/RPS6KB2/STAT5A/STAT5B/RARA/RUNX1T1/NRAS/PIK3R3/CCNA1/EIF4EBP1/RUNX1/PPARD/SOS1/GRB2/JUP/PML/SPI1/TCF7L2/KRAS/ZBTB16/RELA/PIK3CA/PIM1/NFKB1/IKBKB/CCND1/PIK3R2/TCF7L1/FLT3/IKBKG/BAD/RPS6KB1/PIK3CG/PIK3CB/AKT1/MAP2K2
KEGG_NEUROTROPHIN_SIGNALING_PATHWAY	KEGG_NEUROTROPHIN_SIGNALING_PATHWAY	126	0.336392	1.26541	0.0256835	0.178821	0.144066	9709	tags=63%, list=52%, signal=30%	CALML5/NTF4/NTRK3/PIK3CD/MAPK10/MAPK3/CAMK2G/SH2B3/MAP3K3/MAP2K7/SH2B2/BEX3/NRAS/MAPK7/IRAK3/PLCG2/PSEN1/SHC1/CRKL/PIK3R3/SHC2/IRAK1/CALM2/MAPK12/SOS1/RAC1/RPS6KA4/RPS6KA1/MAPK13/GRB2/YWHAB/PTPN11/YWHAG/BDNF/IRAK2/PRKCD/MAPKAPK2/MAPK14/MAP3K5/YWHAQ/RPS6KA5/IRS2/KRAS/CAMK2D/NGF/RAP1B/RELA/RPS6KA6/SORT1/CALM1/PIK3CA/CRK/YWHAE/NFKBIB/KIDINS220/RIPK2/NFKBIA/RAPGEF1/ZNF274/NFKB1/TP73/IKBKB/MAGED1/PIK3…
KEGG_TGF_BETA_SIGNALING_PATHWAY	KEGG_TGF_BETA_SIGNALING_PATHWAY	85	0.349609	1.27428	0.026973	0.178821	0.144066	10837	tags=69%, list=58%, signal=29%	INHBC/LEFTY1/INHBE/TGFB3/TNF/ACVR1C/MAPK3/BMP7/ACVR1/RPS6KB2/E2F4/ID2/CHRD/FST/RBL1/ID1/SMURF1/ZFYVE16/PPP2CB/ZFYVE9/SKP1/EP300/CREBBP/TGFB2/GDF7/SP1/BMPR1A/DCN/INHBA/CUL1/TGFBR1/LEFTY2/BMP4/SMAD6/SMAD4/CDKN2B/SMURF2/ID4/PPP2R1A/NOG/RPS6KB1/IFNG/BMP8A/ROCK2/BMP5/RBL2/SMAD2/THBS2/SMAD5/E2F5/THBS3/PPP2R1B/INHBB/PPP2CA/LTBP1/ACVR2A/SMAD9/TFDP1/NODAL
KEGG_FC_EPSILON_RI_SIGNALING_PATHWAY	KEGG_FC_EPSILON_RI_SIGNALING_PATHWAY	79	0.353968	1.28221	0.027	0.178821	0.144066	5444	tags=44%, list=29%, signal=31%	PLA2G2F/PLA2G10/LAT/FCER1A/JMJD7-PLA2G4B/TNF/PIK3CD/MAPK10/MAPK3/BTK/MAP2K7/NRAS/VAV2/INPP5D/PLCG2/GAB2/PLA2G6/PIK3R3/FYN/IL13/RAC2/SYK/MAPK12/SOS1/FCER1G/RAC1/MAP2K4/PLA2G4A/MAPK13/GRB2/PLA2G12A/RAC3/PRKCD/MAPK14/PLA2G1B
KEGG_VALINE_LEUCINE_AND_ISOLEUCINE_DEGRADATION	KEGG_VALINE_LEUCINE_AND_ISOLEUCINE_DEGRADATION	43	0.396784	1.37269	0.028169	0.178821	0.144066	5833	tags=49%, list=31%, signal=34%	HMGCS2/OXCT2/EHHADH/BCKDHA/BCAT1/ABAT/MCCC2/OXCT1/MCCC1/HSD17B10/ACAT1/PCCB/MCEE/ECHS1/AOX1/DBT/AUH/IVD/ALDH3A2/ALDH1B1/BCAT2
KEGG_PRIMARY_IMMUNODEFICIENCY	KEGG_PRIMARY_IMMUNODEFICIENCY	33	0.422344	1.40742	0.0283976	0.178821	0.144066	8221	tags=67%, list=44%, signal=37%	AIRE/TNFRSF13C/CD19/ZAP70/ICOS/BTK/DCLRE1C/BLNK/ADA/CD4/CD3D/LCK/TAP2/CD3E/PTPRC/RFX5/JAK3/IL2RG/CD8B/TAP1/RFXAP/IKBKG
KEGG_PRIMARY_BILE_ACID_BIOSYNTHESIS	KEGG_PRIMARY_BILE_ACID_BIOSYNTHESIS	16	0.517037	1.49944	0.0286017	0.178821	0.144066	3487	tags=38%, list=19%, signal=31%	CYP8B1/CYP7A1/CYP46A1/BAAT/AKR1D1/HSD3B7
KEGG_P53_SIGNALING_PATHWAY	KEGG_P53_SIGNALING_PATHWAY	67	0.365062	1.30627	0.0296775	0.178821	0.144066	7975	tags=55%, list=43%, signal=32%	TP53I3/CDKN2A/SERPINB5/CCNE1/DDB2/ZMAT3/CDK4/TSC2/SESN1/CDK6/BBC3/MDM4/PERP/ADGRB1/CCNB2/PPM1D/EI24/GADD45A/CHEK1/CYCS/FAS/CASP8/CDKN1A/IGFBP3/CCNG1/SERPINE1/ATM/IGF1/SESN2/SESN3/CHEK2/CCNE2/CCND3/SHISA5/TP73/SIAH1/CCND1
KEGG_SPLICEOSOME	KEGG_SPLICEOSOME	126	0.33372	1.25536	0.0298889	0.178821	0.144066	10532	tags=64%, list=56%, signal=28%	DHX38/HSPA1L/PPIL1/SART1/PRPF4/SYF2/THOC1/PRPF6/RBM22/SF3A3/PRPF3/PRPF19/SRSF5/CTNNBL1/ISY1/HSPA1A/DDX46/USP39/PPIH/LSM4/WBP11/RBMX/PRPF8/SRSF8/SNRNP27/SF3B1/PPIE/SRSF2/NCBP1/SNRPF/TRA2A/LSM5/RBM8A/LSM3/PRPF38A/HNRNPA3/HNRNPA1/SNRPG/SNRPA1/SNRPB/U2SURP/SF3B4/HNRNPM/SRSF7/SNRPB2/LSM2/DDX23/HNRNPU/DDX39B/SMNDC1/SNW1/SNRNP200/PRPF40B/TRA2B/PQBP1/DDX42/HSPA1B/SNRPC/PRPF38B/SLU7/SRSF3/THOC3/MAGOHB/DHX…
KEGG_HUNTINGTONS_DISEASE	KEGG_HUNTINGTONS_DISEASE	165	0.317188	1.21191	0.02997	0.178821	0.144066	9057	tags=57%, list=49%, signal=30%	COX6A2/GRIN2B/DNAI2/HAP1/GRIN1/DLG4/DNAH2/PLCB4/SLC25A4/DCTN1/AP2A2/REST/NDUFS6/CREB3/DNAH1/NDUFS8/POLR2A/CLTB/BBC3/AP2B1/IFT57/CLTC/NDUFA10/AP2M1/UQCRQ/COX7A1/NDUFC1/CREB1/GPX1/EP300/NDUFA6/NDUFS3/VDAC2/NDUFB7/AP2S1/COX7C/VDAC1/SOD2/COX6B1/TBPL1/NDUFA8/CREB3L4/HDAC2/BDNF/MT-CO1/NDUFB9/NDUFA9/DNALI1/COX5B/MT-ATP6/CREB3L2/PLCB1/TGM2/CREBBP/CYCS/COX8A/HDAC1/SLC25A5/NDUFA5/PPID/CASP8/SLC25A6/COX7A2L…
KEGG_WNT_SIGNALING_PATHWAY	KEGG_WNT_SIGNALING_PATHWAY	148	0.321112	1.22131	0.02997	0.178821	0.144066	10431	tags=62%, list=56%, signal=28%	CHP2/WNT6/SFRP5/WIF1/AXIN2/WNT9B/APC2/PLCB4/MAPK10/NFATC4/PRICKLE2/FZD3/NFATC3/CAMK2G/WNT8B/SENP2/LRP6/CHD8/MMP7/DAAM2/PSEN1/PPP2CB/WNT3/TBL1X/RAC2/PRICKLE1/CSNK1E/CHP1/PPP3CB/FZD4/SKP1/EP300/DVL2/PPARD/FRAT2/RAC1/CSNK2A1/NFATC2/AXIN1/RAC3/CACYBP/PRKX/PLCB1/NKD1/CREBBP/CXXC4/TCF7L2/CTBP2/CAMK2D/WNT7B/FZD5/PRKACB/CUL1/PPP3CC/SMAD4/NLK/TBL1Y/WNT2/NFAT5/PRKCA/VANGL1/FBXW11/CCND3/WNT5B/APC/PPP2R1A/SI…
KEGG_ABC_TRANSPORTERS	KEGG_ABC_TRANSPORTERS	44	0.395726	1.36903	0.0302115	0.178821	0.144066	9581	tags=64%, list=51%, signal=31%	ABCC12/ABCA13/ABCC11/ABCG4/ABCA7/ABCC8/CFTR/ABCB4/ABCA1/ABCA12/ABCC2/ABCB6/ABCA5/ABCC1/ABCA10/TAP2/ABCC4/ABCA8/ABCB8/ABCG2/TAP1/ABCC10/ABCD4/ABCB1/ABCB5/ABCA9/ABCC6/ABCA3
KEGG_ALANINE_ASPARTATE_AND_GLUTAMATE_METABOLISM	KEGG_ALANINE_ASPARTATE_AND_GLUTAMATE_METABOLISM	28	0.452861	1.47497	0.0308362	0.178821	0.144066	8127	tags=57%, list=44%, signal=32%	AGXT/ABAT/ALDH5A1/GOT1/GLUD2/ASL/GFPT1/GLUL/GPT/GLS/GLUD1/ASPA/ASS1/CPS1/GPT2/ALDH4A1
KEGG_LYSINE_DEGRADATION	KEGG_LYSINE_DEGRADATION	44	0.395092	1.36683	0.0312185	0.178821	0.144066	8456	tags=57%, list=45%, signal=31%	PIPOX/EHHADH/TMLHE/AASDH/BBOX1/EHMT2/KMT5C/AASS/PLOD1/DOT1L/SETD7/ACAT1/ECHS1/SETD2/SETD1B/ALDH3A2/ALDH1B1/OGDHL/SETD1A/ASH1L/SETDB2/ALDH7A1/HADH/DLST/PLOD2
KEGG_B_CELL_RECEPTOR_SIGNALING_PATHWAY	KEGG_B_CELL_RECEPTOR_SIGNALING_PATHWAY	75	0.36434	1.31793	0.0329705	0.178821	0.144066	9670	tags=68%, list=52%, signal=33%	CHP2/CR2/CD19/PIK3CD/DAPP1/NFATC4/MAPK3/BTK/NFATC3/BLNK/NRAS/VAV2/INPP5D/PLCG2/CD72/PIK3R3/RAC2/SYK/RASGRP3/CHP1/PPP3CB/SOS1/FCGR2B/RAC1/MALT1/GRB2/NFATC2/RAC3/PTPN6/KRAS/LYN/RELA/PIK3AP1/PIK3CA/PPP3CC/NFKBIB/NFKBIA/NFAT5/NFKB1/IKBKB/PIK3R2/IKBKG/PPP3R1/PIK3CG/FOS/CARD11/PIK3CB/AKT1/MAP2K2/NFATC1/NFKBIE
KEGG_UBIQUITIN_MEDIATED_PROTEOLYSIS	KEGG_UBIQUITIN_MEDIATED_PROTEOLYSIS	131	0.326305	1.23081	0.033966	0.178821	0.144066	6729	tags=42%, list=36%, signal=27%	AIRE/BRCA1/UBE2S/DDB2/HERC2/HUWE1/UBE3B/SMURF1/PPIL2/ANAPC1/CDC26/UBE2Z/DDB1/UBA6/PRPF19/UBE2M/ANAPC11/UBA1/UBE2F/NEDD4/UBE2A/HERC3/KLHL9/HERC4/CBLB/UBA3/SKP1/UBE2O/TRIP12/UBE2E2/SKP2/FANCL/PIAS1/CDC34/UBR5/UBE2G1/PIAS3/UBE2H/UBE2D1/PML/CDC23/CUL3/PIAS4/MGRN1/UBE2B/KLHL13/ANAPC2/UBE2D3/WWP1/ELOC/UBA2/PRKN/HERC1/CUL1/CDC16
KEGG_PEROXISOME	KEGG_PEROXISOME	78	0.359302	1.30071	0.0353549	0.178821	0.144066	10367	tags=64%, list=56%, signal=29%	NOS2/BAAT/PIPOX/HAO2/EHHADH/CRAT/PAOX/ACOX3/XDH/AGXT/PXMP4/SLC27A2/MPV17L/PMVK/ACOT8/DHRS4/CROT/FAR1/IDH1/PEX12/PEX19/SOD2/PRDX1/IDH2/PEX11B/PEX10/PEX6/PEX5/GNPAT/PEX16/FAR2/SOD1/ACSL1/HAO1/ECH1/ACOX1/ACSL5/NUDT19/HACL1/PXMP2/ABCD4/PEX26/PEX13/SLC25A17/PEX1/HMGCL/MPV17/PEX14/AMACR/ACSL3
KEGG_NOTCH_SIGNALING_PATHWAY	KEGG_NOTCH_SIGNALING_PATHWAY	47	0.386778	1.34845	0.0361446	0.178821	0.144066	7608	tags=57%, list=41%, signal=34%	RBPJL/PTCRA/DTX4/MAML2/DTX3/DTX2/NCSTN/ADAM17/NOTCH2/PSEN1/KAT2A/NUMB/APH1A/EP300/DVL2/KAT2B/HDAC2/DLL1/CREBBP/HDAC1/CTBP2/JAG2/HES1/DLL4/SNW1/DLL3/HES5
KEGG_LEISHMANIA_INFECTION	KEGG_LEISHMANIA_INFECTION	69	0.354867	1.27192	0.0370741	0.178821	0.144066	9977	tags=62%, list=54%, signal=29%	FCGR3B/IL1A/NOS2/TGFB3/TNF/MAPK3/NCF2/TLR2/IRAK1/TAB1/MAPK12/ELK1/MAPK13/IFNGR2/HLA-DQA1/STAT1/JAK2/PTPN6/HLA-DRB1/MAPK14/TGFB2/CR1/FCGR3A/HLA-DMA/MARCKSL1/JAK1/RELA/IFNGR1/HLA-DQB1/NFKBIB/NFKBIA/MYD88/NFKB1/TLR4/ITGB2/HLA-DRA/IRAK4/IFNG/FOS/CYBA/MAPK11/HLA-DPA1/FCGR2A
KEGG_HEMATOPOIETIC_CELL_LINEAGE	KEGG_HEMATOPOIETIC_CELL_LINEAGE	83	0.354252	1.2886	0.0377346	0.178821	0.144066	7247	tags=52%, list=39%, signal=32%	FCER2/IL1A/CR2/CD19/IL6/MS4A1/ITGA2/ITGA2B/FLT3LG/TFRC/TNF/CD3G/IL1R2/KIT/EPO/ANPEP/CD33/IL4R/CD36/IL6R/CD14/CD5/IL3RA/GP5/CSF1R/IL11/CD4/CD3D/THPO/MME/CD1D/HLA-DRB1/CR1/CD3E/CSF2RA/IL7/ITGA5/CSF1/CD8B/CD34/IL11RA/IL9R/IL5
KEGG_PANCREATIC_CANCER	KEGG_PANCREATIC_CANCER	70	0.354161	1.27171	0.038038	0.178821	0.144066	9709	tags=69%, list=52%, signal=33%	CDKN2A/TGFB3/PIK3CD/ERBB2/MAPK10/TGFA/MAPK3/ARAF/CDK4/RALB/CDK6/PIK3R3/RAC2/EGFR/RALA/RAC1/RALGDS/RALBP1/VEGFC/RAC3/STAT1/TGFB2/KRAS/RB1/JAK1/RELA/PIK3CA/TGFBR1/E2F2/SMAD4/PGF/VEGFD/E2F1/NFKB1/IKBKB/VEGFA/VEGFB/CCND1/PIK3R2/IKBKG/BAD/PIK3CG/PIK3CB/AKT1/ARHGEF6/CDC42/SMAD2/MAPK9
KEGG_STEROID_HORMONE_BIOSYNTHESIS	KEGG_STEROID_HORMONE_BIOSYNTHESIS	50	0.379531	1.33349	0.0381526	0.178821	0.144066	2888	tags=36%, list=15%, signal=31%	UGT1A8/CYP1A1/UGT1A1/CYP7A1/UGT2B7/CYP3A5/CYP3A43/CYP3A7/HSD17B1/HSD17B3/HSD17B2/SULT2B1/SRD5A1/CYP1B1/HSD11B1/HSD17B8/AKR1D1/AKR1C2
KEGG_BLADDER_CANCER	KEGG_BLADDER_CANCER	42	0.39056	1.34594	0.0382294	0.178821	0.144066	8075	tags=57%, list=43%, signal=32%	MMP1/CDKN2A/ERBB2/MAPK3/ARAF/CDK4/RASSF1/NRAS/EGFR/VEGFC/RPS6KA5/MMP2/CDKN1A/KRAS/RB1/DAPK1/E2F2/PGF/VEGFD/E2F1/VEGFA/VEGFB/CCND1/DAPK3
KEGG_CALCIUM_SIGNALING_PATHWAY	KEGG_CALCIUM_SIGNALING_PATHWAY	171	0.313225	1.19932	0.038961	0.178821	0.144066	8739	tags=54%, list=47%, signal=29%	ADRB3/CALML5/CHP2/CCKAR/NOS1/MYLK2/CHRM2/CHRNA7/ITPKA/CACNA1I/CCKBR/DRD1/HTR7/NOS2/ADCY7/TNNC2/HTR4/GRIN1/P2RX1/TACR1/RYR3/LTB4R2/ATP2A1/PLCD1/SPHK1/BDKRB2/ERBB2/ADRB2/PLCB4/PLCD3/ADORA2A/GNA11/CAMK2G/GRIN2D/PHKA2/SLC25A4/ADCY4/ATP2A3/NOS3/TRPC1/PLCD4/PHKG2/PTK2B/PLCG2/CHP1/PHKB/PPP3CB/TBXA2R/CALM2/EGFR/P2RX7/VDAC2/VDAC1/HRH1/MYLK/GNAS/PRKX/PLCB1/PTAFR/HTR2B/SLC25A5/CHRM3/PPID/SLC25A6/EDNRA/PTGER…
KEGG_MAPK_SIGNALING_PATHWAY	KEGG_MAPK_SIGNALING_PATHWAY	256	0.298907	1.16329	0.038961	0.178821	0.144066	9278	tags=55%, list=50%, signal=28%	PLA2G2F/NTF4/CHP2/IL1A/CACNG8/CACNA1I/PLA2G10/FGF9/CACNA2D3/TGFB3/JMJD7-PLA2G4B/DUSP1/TNF/IL1R2/RASGRP1/CACNB1/PAK1/RASGRF2/CACNG6/HSPA1L/MAPK10/NFATC4/MAPK3/FGF7/CDC25B/FLNC/MAP3K3/MAP2K7/GNA12/MECOM/NRAS/ARRB1/CD14/MAPK7/DUSP16/PDGFB/MAP3K4/ELK4/DUSP14/MAPK8IP1/RASA1/DUSP3/PLA2G6/JUND/CRKL/TAOK3/PPP5C/RAC2/RASGRP3/CHP1/PPP3CB/MAPT/TAB1/HSPA1A/MAPK12/EGFR/SOS1/PTPN5/RASA2/ELK1/RAC1/MAP2K4/RPS6KA…
KEGG_LYSOSOME	KEGG_LYSOSOME	121	0.328693	1.23378	0.03996	0.178821	0.144066	6999	tags=44%, list=38%, signal=28%	PSAPL1/ATP6V0A4/GALNS/MANBA/TCIRG1/PLA2G15/ACP5/AGA/FUCA1/LGMN/AP4B1/AP1M1/AP1S1/GALC/AP3M2/AP1B1/NAGA/AP3D1/CLTB/GM2A/GAA/CLTC/AP3S2/MFSD8/ATP6V0A1/SMPD1/ATP6V1H/AP4E1/AP3M1/ATP6V0C/GGA1/LAMP2/AP4M1/LAPTM4B/MAN2B1/HGSNAT/SLC17A5/NEU1/NAGPA/AP1M2/AP3B1/CTSC/CTSO/CTSL/CTSG/M6PR/LAPTM5/SORT1/AP3B2/IDUA/ARSG/ATP6V0D2/GGA3
KEGG_FC_GAMMA_R_MEDIATED_PHAGOCYTOSIS	KEGG_FC_GAMMA_R_MEDIATED_PHAGOCYTOSIS	95	0.340361	1.25393	0.041958	0.183183	0.14758	9977	tags=61%, list=54%, signal=29%	PLA2G4D/LAT/SPHK1/PAK1/PIK3CD/MAPK3/RPS6KB2/DNM1/PLPP3/VAV2/INPP5D/PLCG2/GAB2/PLA2G6/SCIN/CRKL/PIK3R3/MARCKS/RAC2/CFL2/SYK/FCGR2B/RAC1/PLA2G4A/ARPC4/WASF3/ARPC5L/PRKCD/PLD2/DNM1L/FCGR3A/MARCKSL1/PIKFYVE/ARPC5/PTPRC/LYN/PIK3CA/CRK/WASF1/ARPC1B/PRKCA/PIK3R2/SPHK2/WASF2/RPS6KB1/PRKCG/WASL/PIK3CG/PIP5K1B/CFL1/PIK3CB/AKT1/CDC42/ASAP3/LIMK1/VASP/ASAP1/FCGR2A
KEGG_ERBB_SIGNALING_PATHWAY	KEGG_ERBB_SIGNALING_PATHWAY	87	0.340897	1.24356	0.048	0.204571	0.164812	10220	tags=66%, list=55%, signal=30%	NRG1/PAK1/PIK3CD/ERBB2/HBEGF/MAPK10/TGFA/MAPK3/CAMK2G/ARAF/RPS6KB2/STAT5A/STAT5B/MAP2K7/NRG4/NRAS/PLCG2/SHC1/CRKL/PAK4/PIK3R3/SHC2/CBLB/EIF4EBP1/EGFR/SOS1/ELK1/MAP2K4/GRB2/NCK2/CDKN1A/KRAS/CAMK2D/PIK3CA/CRK/PAK2/SRC/ABL2/CBL/PRKCA/NCK1/PIK3R2/BAD/RPS6KB1/ERBB4/PRKCG/PIK3CG/BTC/SHC4/PIK3CB/AKT1/MAP2K2/CAMK2A/MAPK9/HRAS/SOS2/PAK5
