# Supplementary material for: Comprehensive analysis of integrin αvβ3/α6β1 in prognosis and immune escape of prostate cancer
Source: Aging (Albany NY). 2023 Oct 19;15(20):11369–88. doi: 10.18632/aging.205131 (PMC10637796; doi:10.18632/aging.205131)
Supplement: Supplementary Table 4 [file aging-15-205131-s005.xlsx]

## Sheet: GSEA.result
Supplementary Table 4. KEGG enrichment analysis for two risk groups in GEO cohort.
ID	Description	setSize	enrichmentScore	NES	pvalue	p.adjust	qvalues	rank	leading_edge	core_enrichment
KEGG_N_GLYCAN_BIOSYNTHESIS	KEGG_N_GLYCAN_BIOSYNTHESIS	46	0.564509	3.45917	1e-10	2.25e-09	1.53947e-09	2968	tags=46%, list=9%, signal=41%	STT3B/ALG14/DAD1/TUSC3/ALG1/DPM1/DOLPP1/MGAT4A/ALG6/DDOST/DPM3/STT3A/ALG5/MGAT2/B4GALT3/ALG13/ALG10B/ALG8/ALG9/RPN1/DPAGT1
KEGG_OXIDATIVE_PHOSPHORYLATION	KEGG_OXIDATIVE_PHOSPHORYLATION	99	0.603808	4.61343	1e-10	2.25e-09	1.53947e-09	3263	tags=55%, list=10%, signal=49%	PPA1/NDUFB6/NDUFB5/COX7B/UQCRFS1/ATP6V1A/NDUFB3/COX17/SDHD/UQCRH/COX6A1/COX7A2/SDHB/CYC1/NDUFA11/NDUFA2/COX8A/COX5A/ATP6V0B/UQCRB/UQCRHL/COX6B1/COX7A2L/NDUFAB1/NDUFB2/COX5B/NDUFB9/ATP6V1G1/NDUFA3/NDUFA1/UQCRQ/NDUFA4/ATP6V0E2/ATP6V0E1/NDUFA7/SDHC/UQCRC2/NDUFC1/NDUFS4/COX6C/NDUFB7/COX7C/NDUFA4L2/NDUFA8/NDUFS5/ATP6V0D1/ATP6V1E2/SDHA/ATP6V1D/NDUFV2/NDUFB10/NDUFS3/NDUFV1/NDUFV3
KEGG_PARKINSONS_DISEASE	KEGG_PARKINSONS_DISEASE	97	0.587848	4.50476	1e-10	2.25e-09	1.53947e-09	3263	tags=55%, list=10%, signal=49%	NDUFB6/NDUFB5/COX7B/UQCRFS1/NDUFB3/SLC25A5/SDHD/UQCRH/COX6A1/COX7A2/UBB/SDHB/CYC1/NDUFA2/COX8A/COX5A/UQCRB/UQCRHL/COX6B1/COX7A2L/NDUFAB1/NDUFB2/COX5B/GPR37/NDUFB9/NDUFA3/NDUFA1/UQCRQ/NDUFA4/NDUFA7/SDHC/UQCRC2/UBE2G1/NDUFC1/NDUFS4/SNCA/HTRA2/COX6C/NDUFB7/PARK7/VDAC1/COX7C/NDUFA4L2/NDUFA8/SLC25A4/NDUFS5/SDHA/NDUFV2/VDAC3/NDUFB10/NDUFS3/NDUFV1/NDUFV3
KEGG_PROTEASOME	KEGG_PROTEASOME	43	0.621932	3.77747	1e-10	2.25e-09	1.53947e-09	4126	tags=60%, list=13%, signal=53%	PSMC4/PSMA3/PSMD6/PSMA6/PSMA5/PSMB5/PSMD14/PSMA1/PSMA4/PSMC2/PSMB4/PSME2/PSMC6/PSMD7/PSMD2/PSMB2/PSMB7/PSMB1/PSMA2/PSME3/PSMB6/POMP/PSMD13/PSMD4/PSMD8/PSMB9
KEGG_PROTEIN_EXPORT	KEGG_PROTEIN_EXPORT	22	0.793864	3.91751	1e-10	2.25e-09	1.53947e-09	2792	tags=68%, list=9%, signal=62%	SEC61G/SPCS1/SEC61B/SRP54/SPCS3/IMMP2L/SRP9/SRP72/SRPRB/SRP14/OXA1L/SPCS2/SEC11A/SRP19/SEC11C
KEGG_PYRIMIDINE_METABOLISM	KEGG_PYRIMIDINE_METABOLISM	94	0.37221	2.79062	1e-10	2.25e-09	1.53947e-09	3457	tags=41%, list=11%, signal=37%	TK1/CMPK1/UPRT/POLR3K/NME1-NME2/POLR2B/ENTPD5/DCTD/NME5/RRM2B/TYMS/POLR2J3/NME7/POLE4/POLR2D/POLR2H/PRIM2/CANT1/POLE3/DUT/POLR2J2/POLR2F/UCK2/ITPA/NME1/PRIM1/POLR2L/RRM1/RRM2/POLR1C/POLR2I/DCK/POLR2G/ENTPD6/POLD2/TXNRD1/POLR2K/POLR1D/NUDT2
KEGG_RIBOSOME	KEGG_RIBOSOME	87	0.7916	6.04424	1e-10	2.25e-09	1.53947e-09	3224	tags=69%, list=10%, signal=62%	RPS7/RPL29/RPS21/RPL34/RPL21/RPS2/RPLP0/MRPL13/RPL26/RPL26L1/RPS4X/RPL8/RPS26/RPS13/RPL7/RPS15A/RPL10A/RPL17/RPL36AL/RPL14/RPL36/RPL30/RPL35A/RPL13A/RPL24/RPL12/RPL23A/RPS24/RPL31/RPL22/RPL7A/RPL9/RPS5/RPS9/RPL19/RPS18/RPS15/RPL39/FAU/RPL6/RPL27/RPL15/RPL23/RPS17/RPS6/RPS8/RPS3/RPS25/RPS12/RPS27A/RSL24D1/RPS29/RPS3A/RPS28/RPS20/RPSA/RPLP1/RPL36A/RPL27A/RPL38
KEGG_VALINE_LEUCINE_AND_ISOLEUCINE_DEGRADATION	KEGG_VALINE_LEUCINE_AND_ISOLEUCINE_DEGRADATION	43	0.601844	3.65546	1e-10	2.25e-09	1.53947e-09	3494	tags=63%, list=11%, signal=56%	MCCC2/AUH/MCEE/PCCB/EHHADH/BCAT1/OXCT1/DLD/HSD17B10/ACADM/HADHB/ALDH7A1/HADH/ACAT1/MCCC1/ECHS1/ALDH9A1/ACAT2/BCAT2/ACAA1/HIBCH/HIBADH/ALDH6A1/HMGCS2/ACAD8/BCKDHB/IVD
KEGG_AMINO_SUGAR_AND_NUCLEOTIDE_SUGAR_METABOLISM	KEGG_AMINO_SUGAR_AND_NUCLEOTIDE_SUGAR_METABOLISM	42	0.520168	3.13813	9.22484e-10	1.84497e-08	1.26235e-08	3369	tags=48%, list=11%, signal=43%	GFPT1/PGM3/GMDS/NANS/GNE/UAP1/UGDH/PGM2/GMPPB/PMM1/MPI/PGM1/CMAS/GPI/GNPDA1/GNPDA2/GNPNAT1/NPL/PMM2/CYB5R1
KEGG_SPLICEOSOME	KEGG_SPLICEOSOME	110	0.322066	2.51736	1.52738e-09	2.74929e-08	1.88109e-08	4073	tags=44%, list=13%, signal=38%	LSM3/SNRNP27/HSPA8/PPIL1/SNRPF/PPIH/DHX15/SNRPB2/LSM7/SNRPB/PCBP1/LSM4/SNRPC/LSM5/HNRNPK/MAGOH/HNRNPA1/THOC3/SNRPG/EIF4A3/CRNKL1/CDC5L/PQBP1/SF3B5/PLRG1/PRPF6/CWC15/RBMX/PRPF18/LSM8/SNRPA1/PPIE/HNRNPM/HNRNPA3/LSM2/ZMAT2/NCBP2/SNRNP40/SNW1/U2AF2/SF3B1/SMNDC1/PUF60/SNRPD2/SNRPD1/SYF2/ISY1/PRPF4
KEGG_CITRATE_CYCLE_TCA_CYCLE	KEGG_CITRATE_CYCLE_TCA_CYCLE	30	0.593328	3.14364	2.59345e-09	4.24383e-08	2.90367e-08	2791	tags=50%, list=9%, signal=46%	IDH1/SDHD/SUCLG2/SDHB/DLD/MDH1/ACLY/ACO2/SUCLA2/DLAT/SDHC/PDHB/FH/MDH2/SDHA
KEGG_PEROXISOME	KEGG_PEROXISOME	76	0.371199	2.72478	4.99526e-09	7.49289e-08	5.12672e-08	3364	tags=37%, list=11%, signal=33%	SLC27A2/IDH1/HSD17B4/PEX7/ACSL1/AMACR/HACL1/EHHADH/ACOT8/PEX10/SLC25A17/PEX11B/PRDX1/CAT/GNPAT/ACSL3/PRDX5/MPV17/SOD1/PEX11A/PXMP2/ACAA1/PEX19/PMVK/MLYCD/PEX1/PHYH/ECH1
KEGG_FOCAL_ADHESION	KEGG_FOCAL_ADHESION	194	-0.384082	-1.93593	3.41754e-08	4.73198e-07	3.23767e-07	2044	tags=21%, list=7%, signal=19%	TNN/VAV2/VEGFA/COL5A3/PIK3CD/COL4A6/BCL2/LAMC3/PAK1/ITGA7/TNC/VCL/COL6A3/LAMA4/COL4A2/JUN/ITGA9/ITGB4/THBS3/ITGA3/ITGA10/COL5A1/CAV1/LAMB3/ACTN4/ZYX/COL6A2/MYLK/BIRC3/TLN1/ACTN1/PIP5K1C/PRKCA/MYL9/LAMB2/ITGA5/COL6A1/FLNA/ITGA8/FLNC
KEGG_GLYCOSYLPHOSPHATIDYLINOSITOL_GPI_ANCHOR_BIOSYNTHESIS	KEGG_GLYCOSYLPHOSPHATIDYLINOSITOL_GPI_ANCHOR_BIOSYNTHESIS	25	0.565377	2.91375	5.24864e-07	6.74825e-06	4.61722e-06	2927	tags=52%, list=9%, signal=47%	PIGK/GPAA1/PIGH/PIGP/PIGY/PIGB/PIGF/PIGC/PIGM/PIGW/PIGT/PIGO/PIGG
KEGG_DNA_REPLICATION	KEGG_DNA_REPLICATION	36	0.470083	2.67796	7.80391e-07	9.36469e-06	6.40742e-06	3393	tags=47%, list=11%, signal=42%	RPA3/SSBP1/RNASEH2A/RFC4/POLE4/PCNA/PRIM2/POLE3/MCM4/MCM2/FEN1/PRIM1/RPA1/POLD2/RPA2/MCM5/RFC3
KEGG_CELL_CYCLE	KEGG_CELL_CYCLE	116	0.264172	2.10016	1.08274e-06	1.21808e-05	8.33425e-06	3346	tags=27%, list=11%, signal=24%	E2F5/CDC20/CCNB2/PTTG1/MYC/ANAPC10/YWHAQ/RBX1/ANAPC13/CDC25C/CDK4/TFDP1/BUB1/ANAPC7/RBL2/YWHAZ/PCNA/MCM4/YWHAG/MCM2/MAD2L2/ANAPC5/RB1/CCNH/CCNA2/CDKN1B/MAD2L1/CDKN2C/MCM5/CHEK1/CCNE2
KEGG_PATHOGENIC_ESCHERICHIA_COLI_INFECTION	KEGG_PATHOGENIC_ESCHERICHIA_COLI_INFECTION	53	0.371959	2.42184	1.60882e-06	1.70345e-05	1.16552e-05	3356	tags=40%, list=11%, signal=35%	ARPC3/NCK1/TUBB3/TUBA1C/ACTG1/YWHAQ/TUBB2A/TUBB/CDH1/KRT18/ARPC1B/LY96/YWHAZ/TUBA1B/ARPC5/CDC42/TUBA1A/ARPC1A/RHOA/ARPC4/NCL
KEGG_ECM_RECEPTOR_INTERACTION	KEGG_ECM_RECEPTOR_INTERACTION	83	-0.453351	-2.07304	2.03251e-06	2.03251e-05	1.39067e-05	4612	tags=36%, list=15%, signal=31%	SV2B/COL4A4/COL4A1/GP6/ITGB8/LAMA5/ITGA2B/TNN/COL5A3/SV2A/AGRN/COL4A6/LAMC3/ITGA7/TNC/COL6A3/LAMA4/COL4A2/ITGA9/ITGB4/THBS3/ITGA3/ITGA10/COL5A1/LAMB3/COL6A2/LAMB2/ITGA5/COL6A1/ITGA8
KEGG_AMINOACYL_TRNA_BIOSYNTHESIS	KEGG_AMINOACYL_TRNA_BIOSYNTHESIS	22	0.561026	2.76851	3.81285e-06	3.61218e-05	2.47149e-05	10676	tags=95%, list=34%, signal=63%	YARS2/IARS2/NARS2/WARS2/DARS2/LARS2/EARS2/FARSA/FARS2/MARS2/RARS2/PSTK/MTFMT/VARS2/PARS2/SARS2/TARS2/CARS2/HARS2/SEPSECS/FARSB
KEGG_PROPANOATE_METABOLISM	KEGG_PROPANOATE_METABOLISM	31	0.458374	2.48602	4.78229e-06	4.30406e-05	2.94488e-05	3455	tags=52%, list=11%, signal=46%	MCEE/PCCB/EHHADH/SUCLG2/ACADM/ALDH7A1/SUCLA2/ACAT1/ECHS1/LDHA/ALDH9A1/ACAT2/HIBCH/MLYCD/ALDH6A1/SUCLG1
KEGG_OOCYTE_MEIOSIS	KEGG_OOCYTE_MEIOSIS	109	0.245806	1.90654	1.1207e-05	9.60601e-05	6.57254e-05	2253	tags=20%, list=7%, signal=19%	CDC20/CCNB2/PPP3CA/PTTG1/MAP2K1/AURKA/ANAPC10/YWHAQ/RBX1/ANAPC13/CDC25C/PPP1CC/BUB1/ANAPC7/PPP1CA/YWHAZ/MAPK12/CALM2/YWHAG/PPP2CB/MAD2L2/ANAPC5
KEGG_NUCLEOTIDE_EXCISION_REPAIR	KEGG_NUCLEOTIDE_EXCISION_REPAIR	44	0.371615	2.27972	1.6481e-05	0.000134844	9.2262e-05	3393	tags=41%, list=11%, signal=37%	RPA3/GTF2H5/RBX1/RFC4/RAD23B/POLE4/PCNA/POLE3/MNAT1/CETN2/CCNH/GTF2H3/RPA1/POLD2/RPA2/ERCC1/CUL4A/RFC3
KEGG_FATTY_ACID_METABOLISM	KEGG_FATTY_ACID_METABOLISM	40	0.378053	2.25758	3.37309e-05	0.000263981	0.000180619	2459	tags=35%, list=8%, signal=32%	ACSL1/EHHADH/ACADM/ACADL/HADHB/ALDH7A1/CPT2/HADH/ACAT1/ACSL3/ECHS1/ALDH9A1/ACAT2/ACAA1
KEGG_RNA_DEGRADATION	KEGG_RNA_DEGRADATION	54	0.315439	2.08279	6.17472e-05	0.000463104	0.000316861	3127	tags=37%, list=10%, signal=33%	EXOSC5/LSM3/EXOSC4/WDR61/EXOSC3/CNOT7/LSM7/TTC37/LSM4/CNOT8/LSM5/CNOT6/EXOSC9/HSPA9/ENO1/LSM8/XRN2/HSPD1/LSM2/CNOT10
KEGG_BUTANOATE_METABOLISM	KEGG_BUTANOATE_METABOLISM	34	0.406857	2.31225	7.68362e-05	0.00055322	0.000378519	2369	tags=32%, list=8%, signal=30%	ACSM1/AACS/EHHADH/OXCT1/ALDH7A1/HADH/ACAT1/PDHB/ECHS1/ALDH9A1/ACAT2
KEGG_PYRUVATE_METABOLISM	KEGG_PYRUVATE_METABOLISM	39	0.367642	2.21498	0.000114182	0.000790491	0.000540862	2756	tags=38%, list=9%, signal=35%	GLO1/ME2/DLD/MDH1/ALDH7A1/DLAT/HAGH/GRHPR/ACAT1/PDHB/LDHA/ALDH9A1/ACAT2/ACYP2/MDH2
KEGG_LYSOSOME	KEGG_LYSOSOME	119	0.216668	1.77562	0.000138621	0.000924141	0.000632307	4220	tags=35%, list=13%, signal=31%	AP1S1/DNASE2B/AP3S1/LAMP2/ATP6V0B/LIPA/CTSD/CLTC/GLA/ACP5/LGMN/GUSB/FUCA1/CTSO/AP1M2/SUMF1/ATP6V0D1/GLB1/GNPTAB/LAPTM4A/AP3M1/SCARB2/AP3B1/M6PR/CTSS/PPT1/AGA/CTSK/AP3S2/NAGA/GNS/AP1S2/CLTA/PSAP/AP1G1/CTSC/CD63/ATP6V0A2/NPC2/CD164/IDS/GBA
KEGG_MISMATCH_REPAIR	KEGG_MISMATCH_REPAIR	23	0.442229	2.22488	0.000202004	0.0012986	0.000888514	3393	tags=43%, list=11%, signal=39%	RPA3/SSBP1/RFC4/PCNA/MLH1/RPA1/POLD2/MSH6/RPA2/RFC3
KEGG_RNA_POLYMERASE	KEGG_RNA_POLYMERASE	28	0.396346	2.10416	0.000278263	0.00172533	0.00118049	3429	tags=46%, list=11%, signal=41%	POLR3K/POLR2B/POLR2J3/POLR2D/POLR2H/POLR2J2/POLR2F/POLR2L/POLR1C/POLR2I/POLR2G/POLR2K/POLR1D
KEGG_CARDIAC_MUSCLE_CONTRACTION	KEGG_CARDIAC_MUSCLE_CONTRACTION	71	0.263198	1.83216	0.000287554	0.00172533	0.00118049	1919	tags=24%, list=6%, signal=23%	COX7B/UQCRFS1/UQCRH/COX6A1/COX7A2/CYC1/COX8A/COX5A/UQCRB/UQCRHL/COX6B1/COX7A2L/COX5B/UQCRQ/UQCRC2/COX6C/COX7C
KEGG_VASCULAR_SMOOTH_MUSCLE_CONTRACTION	KEGG_VASCULAR_SMOOTH_MUSCLE_CONTRACTION	111	-0.36221	-1.72029	0.000355713	0.00206543	0.00141319	4110	tags=25%, list=13%, signal=22%	KCNMB3/GNA11/PLA2G2F/ARAF/GUCY1A2/ADCY5/PLCB4/ACTG2/ADORA2A/NPR2/ARHGEF12/RAMP2/CACNA1C/CALD1/KCNMA1/ADCY3/ITPR3/PPP1R14A/MYLK/ADCY4/EDNRA/CALML3/PLA2G2D/KCNMB1/PRKCA/MYL9/MYH11/PLA2G4B
KEGG_VIBRIO_CHOLERAE_INFECTION	KEGG_VIBRIO_CHOLERAE_INFECTION	53	0.288412	1.87786	0.000440565	0.00247818	0.0016956	3032	tags=30%, list=10%, signal=27%	KDELR2/ATP6V1A/SEC61G/KDELR3/ACTG1/SEC61B/ATP6V0B/ATP6V1G1/ATP6V0E2/ATP6V0E1/TJP1/ATP6V0D1/SLC12A2/ATP6V1E2/ATP6V1D/ARF1
KEGG_BIOSYNTHESIS_OF_UNSATURATED_FATTY_ACIDS	KEGG_BIOSYNTHESIS_OF_UNSATURATED_FATTY_ACIDS	20	0.449708	2.16678	0.000714909	0.0038995	0.00266808	4306	tags=60%, list=14%, signal=52%	ELOVL5/ELOVL2/ACAA1/ACOT1/HSD17B12/SCD/ACOT4/ELOVL6/ACOT2/ACOX1/PECR/YOD1
KEGG_SNARE_INTERACTIONS_IN_VESICULAR_TRANSPORT	KEGG_SNARE_INTERACTIONS_IN_VESICULAR_TRANSPORT	38	0.321005	1.90578	0.000745563	0.0039471	0.00270065	3154	tags=29%, list=10%, signal=26%	BET1/VAMP7/STX19/SNAP23/VAMP4/USE1/SEC22B/STX8/GOSR1/STX6/BNIP1
KEGG_RIBOFLAVIN_METABOLISM	KEGG_RIBOFLAVIN_METABOLISM	14	0.550186	2.25559	0.000851079	0.00434433	0.00297244	1731	tags=43%, list=6%, signal=41%	ACP1/PHPT1/ENPP3/ACP5/ACP6/MTMR6
KEGG_GLYCOLYSIS_GLUCONEOGENESIS	KEGG_GLYCOLYSIS_GLUCONEOGENESIS	61	0.265904	1.8055	0.000868866	0.00434433	0.00297244	2888	tags=31%, list=9%, signal=28%	ALDH3B2/PGAM1/ALDH1A3/DLD/ALDH7A1/DLAT/PGM2/AKR1A1/PGK1/PDHB/FBP1/ALDOA/LDHA/TPI1/ALDH9A1/PGAM4/PGM1/ENO1/GPI
KEGG_HYPERTROPHIC_CARDIOMYOPATHY_HCM	KEGG_HYPERTROPHIC_CARDIOMYOPATHY_HCM	83	-0.37207	-1.70137	0.00123916	0.00602837	0.00412467	1631	tags=19%, list=5%, signal=18%	TPM1/CACNA1C/LMNA/ITGA7/SGCA/ITGA9/ITGB4/ITGA3/ITGA10/TPM2/ACTC1/TGFB3/IL6/ITGA5/DES/ITGA8
KEGG_GLYOXYLATE_AND_DICARBOXYLATE_METABOLISM	KEGG_GLYOXYLATE_AND_DICARBOXYLATE_METABOLISM	16	0.4759	2.07266	0.00148806	0.00703617	0.00481422	3774	tags=50%, list=12%, signal=44%	MDH1/ACO2/GRHPR/MTHFD2/AFMID/MDH2/MTHFD1/CS
KEGG_DILATED_CARDIOMYOPATHY	KEGG_DILATED_CARDIOMYOPATHY	90	-0.356501	-1.64786	0.0015245	0.00703617	0.00481422	1631	tags=19%, list=5%, signal=18%	TPM1/CACNA1C/LMNA/ITGA7/SGCA/ITGA9/ITGB4/ADCY3/ITGA3/ITGA10/TPM2/ACTC1/ADCY4/TGFB3/ITGA5/DES/ITGA8
KEGG_FRUCTOSE_AND_MANNOSE_METABOLISM	KEGG_FRUCTOSE_AND_MANNOSE_METABOLISM	32	0.341942	1.93746	0.00173333	0.00779999	0.00533684	2248	tags=31%, list=7%, signal=29%	SORD/GMDS/PHPT1/MTMR6/GMPPB/PMM1/FBP1/ALDOA/TPI1/MPI
KEGG_BETA_ALANINE_METABOLISM	KEGG_BETA_ALANINE_METABOLISM	22	0.392604	1.9374	0.00217786	0.00956134	0.00654197	3139	tags=41%, list=10%, signal=37%	SMS/EHHADH/ACADM/ALDH7A1/ECHS1/SRM/ALDH9A1/HIBCH/MLYCD
KEGG_AXON_GUIDANCE	KEGG_AXON_GUIDANCE	127	-0.323671	-1.56035	0.00238031	0.0102013	0.00697985	3532	tags=25%, list=11%, signal=22%	EFNB3/LIMK1/SLIT1/UNC5B/LRRC4C/PLXNA1/EPHA3/NFAT5/SEMA3A/UNC5D/SRGAP1/PPP3CB/EPHA2/SLIT3/NFATC4/CHP2/ARHGEF12/EPHB1/EFNB1/PAK1/SEMA4C/NTN4/SEMA6A/SEMA3F/SEMA3B/FES/SLIT2/SEMA3E/ROBO3/PLXNB1/EPHB4/EPHB6
KEGG_TRYPTOPHAN_METABOLISM	KEGG_TRYPTOPHAN_METABOLISM	38	0.292264	1.73514	0.00248776	0.0104139	0.00712528	2417	tags=34%, list=8%, signal=32%	DDC/EHHADH/ALDH7A1/CAT/HADH/MAOA/ACAT1/ECHS1/CYP1B1/ALDH9A1/ACAT2/WARS2/AFMID
KEGG_PENTOSE_PHOSPHATE_PATHWAY	KEGG_PENTOSE_PHOSPHATE_PATHWAY	26	0.352009	1.84757	0.00263595	0.0107834	0.00737813	3431	tags=46%, list=11%, signal=41%	PRPS1/PGD/PGM2/FBP1/ALDOA/PGLS/RBKS/PGM1/GPI/PRPS2/RPE/TKT
KEGG_ARRHYTHMOGENIC_RIGHT_VENTRICULAR_CARDIOMYOPATHY_ARVC	KEGG_ARRHYTHMOGENIC_RIGHT_VENTRICULAR_CARDIOMYOPATHY_ARVC	74	-0.365337	-1.64455	0.00274122	0.0109649	0.00750229	2106	tags=20%, list=7%, signal=19%	TCF7L2/TCF7L1/CACNA1C/LMNA/ITGA7/SGCA/ITGA9/ITGB4/ITGA3/ITGA10/ACTN4/ACTN1/ITGA5/DES/ITGA8
KEGG_PROGESTERONE_MEDIATED_OOCYTE_MATURATION	KEGG_PROGESTERONE_MEDIATED_OOCYTE_MATURATION	84	0.217031	1.60474	0.00296413	0.0115988	0.00793601	2563	tags=20%, list=8%, signal=19%	CCNB2/PIK3CB/MAP2K1/ANAPC10/ANAPC13/CDC25C/PDE3B/MAPK9/BUB1/ANAPC7/MAPK13/MAPK12/MAD2L2/GNAI3/ANAPC5/HSP90AB1/CCNA2
KEGG_ALDOSTERONE_REGULATED_SODIUM_REABSORPTION	KEGG_ALDOSTERONE_REGULATED_SODIUM_REABSORPTION	42	-0.423282	-1.71001	0.00313891	0.0120214	0.00822514	2108	tags=31%, list=7%, signal=29%	PRKCB/INS/SCNN1B/ATP1A3/ATP1A2/PIK3CD/HSD11B2/IRS1/SGK1/SFN/SCNN1G/PRKCA/SCNN1A
KEGG_BASAL_TRANSCRIPTION_FACTORS	KEGG_BASAL_TRANSCRIPTION_FACTORS	35	0.311596	1.72814	0.00334709	0.0125516	0.00858792	2679	tags=29%, list=9%, signal=26%	GTF2A2/TAF7/TBPL1/TAF2/GTF2B/TAF10/GTF2E1/TAF12/TAF9/GTF2H3
KEGG_ASTHMA	KEGG_ASTHMA	30	0.321817	1.70509	0.0053561	0.0196755	0.0134622	2307	tags=27%, list=7%, signal=25%	HLA-DRB1/HLA-DRB5/HLA-DQA1/FCER1G/HLA-DRA/HLA-DPA1/HLA-DRB4/HLA-DRB3
KEGG_CYSTEINE_AND_METHIONINE_METABOLISM	KEGG_CYSTEINE_AND_METHIONINE_METABOLISM	34	0.317048	1.80185	0.00565742	0.0203667	0.0139351	2265	tags=21%, list=7%, signal=19%	SMS/ENOPH1/APIP/AHCY/ADI1/LDHA/SRM
KEGG_HISTIDINE_METABOLISM	KEGG_HISTIDINE_METABOLISM	27	0.31526	1.69263	0.00913393	0.0322374	0.0220572	2670	tags=37%, list=9%, signal=34%	DDC/ALDH3B2/ALDH1A3/ALDH7A1/LCMT1/LCMT2/MAOA/ALDH9A1/METTL6/ACY3
KEGG_TYPE_I_DIABETES_MELLITUS	KEGG_TYPE_I_DIABETES_MELLITUS	43	0.261971	1.59115	0.01146	0.0396694	0.0271422	2307	tags=19%, list=7%, signal=17%	HLA-DRB1/HLA-DRB5/HLA-DQA1/HLA-DRA/HLA-DPA1/CPE/HLA-DRB4/HLA-DRB3
KEGG_ARGININE_AND_PROLINE_METABOLISM	KEGG_ARGININE_AND_PROLINE_METABOLISM	51	0.243461	1.4984	0.0118015	0.0398804	0.0272866	2558	tags=22%, list=8%, signal=20%	ACY1/SMS/LAP3/ALDH7A1/SAT1/MAOA/CKMT1A/PYCR1/SRM/ALDH9A1/CKMT1B
KEGG_CIRCADIAN_RHYTHM_MAMMAL	KEGG_CIRCADIAN_RHYTHM_MAMMAL	11	-0.581898	-1.66991	0.0121429	0.0398804	0.0272866	8846	tags=64%, list=28%, signal=46%	NR1D1/NPAS2/PER3/CLOCK/PER2/CRY2/PER1
KEGG_LEISHMANIA_INFECTION	KEGG_LEISHMANIA_INFECTION	70	0.211471	1.46671	0.0121857	0.0398804	0.0272866	2536	tags=19%, list=8%, signal=17%	HLA-DRB1/HLA-DRB5/HLA-DQA1/MARCKSL1/JAK1/HLA-DRA/HLA-DPA1/MAPK13/MAPK12/IRAK1/HLA-DRB4/HLA-DRB3/ITGB2
KEGG_GLUTATHIONE_METABOLISM	KEGG_GLUTATHIONE_METABOLISM	50	-0.36457	-1.53498	0.0124935	0.0401576	0.0274763	3299	tags=22%, list=11%, signal=20%	GSTA1/GSTM1/GSTT2/ANPEP/GGT6/GSTP1/GPX2/GPX3/GSTM5/GSTM3/GSTM2
KEGG_STEROID_BIOSYNTHESIS	KEGG_STEROID_BIOSYNTHESIS	15	0.388652	1.66411	0.0133981	0.0423097	0.0289488	1761	tags=33%, list=6%, signal=31%	SQLE/SOAT1/LIPA/TM7SF2/EBP
KEGG_DRUG_METABOLISM_CYTOCHROME_P450	KEGG_DRUG_METABOLISM_CYTOCHROME_P450	72	-0.339497	-1.5223	0.0144358	0.0448007	0.0306531	3947	tags=22%, list=13%, signal=19%	ADH7/FMO1/GSTA1/GSTM1/UGT1A7/GSTT2/UGT1A4/MAOB/ALDH3A1/FMO2/GSTP1/AOX1/GSTM5/GSTM3/GSTM2/CYP3A5
KEGG_OLFACTORY_TRANSDUCTION	KEGG_OLFACTORY_TRANSDUCTION	384	-0.243443	-1.2913	0.0154703	0.0466156	0.0318949	22087	tags=90%, list=70%, signal=27%	OR9G4/CLCA1/OR52B2/OR56A4/OR7A17/OR2T11/OR13A1/OR5T3/OR4E2/OR5B17/OR52D1/OR13D1/OR51Q1/OR52N2/OR2L3/OR6C4/OR2F2/OR51S1/OR1A2/OR51G2/OR6B3/OR4D6/OR8D4/OR2K2/OR5AU1/OR13J1/OR5D13/OR5B12/PRKACG/OR10G7/PRKACA/OR1G1/CALM1/OR51E1/OR1L6/OR52A1/OR4D9/OR52I2/OR8D2/OR5H6/OR6K3/OR4C16/CALML6/OR10G8/OR9A4/OR5H2/OR13G1/OR14J1/OR2M5/OR8K1/OR4K1/OR10S1/OR10Z1/OR4P4/OR6Q1/OR8B4/OR4Q3/OR8B8/OR6C76/OR52N4/OR8U1/OR…
KEGG_EPITHELIAL_CELL_SIGNALING_IN_HELICOBACTER_PYLORI_INFECTION	KEGG_EPITHELIAL_CELL_SIGNALING_IN_HELICOBACTER_PYLORI_INFECTION	66	-0.340352	-1.50016	0.0155385	0.0466156	0.0318949	4604	tags=26%, list=15%, signal=22%	NFKBIA/CXCR1/PLCG1/ATP6V0D2/MAPK11/ATP6V1G3/TCIRG1/IKBKB/ADAM17/CCL5/MAP3K14/PAK1/GIT1/JUN/HBEGF/JAM3/ATP6V1B1
KEGG_PHENYLALANINE_METABOLISM	KEGG_PHENYLALANINE_METABOLISM	17	0.374752	1.6793	0.0199329	0.0588185	0.0402442	1689	tags=29%, list=5%, signal=28%	DDC/ALDH3B2/ALDH1A3/MIF/MAOA
KEGG_ALLOGRAFT_REJECTION	KEGG_ALLOGRAFT_REJECTION	37	0.251685	1.46233	0.0204607	0.059402	0.0406435	2307	tags=19%, list=7%, signal=18%	HLA-DRB1/HLA-DRB5/HLA-DQA1/HLA-DRA/HLA-DPA1/HLA-DRB4/HLA-DRB3
KEGG_MAPK_SIGNALING_PATHWAY	KEGG_MAPK_SIGNALING_PATHWAY	260	-0.257122	-1.32675	0.024975	0.0713572	0.0488234	3617	tags=17%, list=12%, signal=15%	NF1/MAPK11/RASGRP2/MAPK8IP1/TAOK1/NTF3/NTF4/PPP3CB/NFKB2/JUND/FGF2/NR4A1/MAP3K11/TNFRSF1A/FGF9/RRAS/NFATC4/CDC25B/IKBKB/CHP2/CACNA1C/MAP3K12/HSPA6/MAP3K14/PAK1/SRF/JUN/DUSP1/PPM1B/DUSP8/MAP3K6/PLA2G2D/MAPK8IP3/TGFB3/CACNA1H/PRKCA/FOS/GADD45B/GADD45G/DUSP5/FLNA/PLA2G4B/FLNC
